# Supplementary material for: Integrative Studies of Human Cord Blood Derived Mononuclear Cells and Umbilical Cord Derived Mesenchyme Stem Cells in Ameliorating Bronchopulmonary Dysplasia
Source: Front Cell Dev Biol. 2021 Nov 9;9:679866. doi: 10.3389/fcell.2021.679866 (PMC8631197; doi:10.3389/fcell.2021.679866)
Supplement: Supplementary file 1 [file Table_1.xlsx]

## Sheet: BPD VS MSC 
entrez	ID	logFC	Pvalue	regulation	ensembl	uniprot	symbol	description
22228	ENSMUST00000207748	-13.0686	1.1363e-07	DOWN	ENSMUSG00000033685	Q549J5	Ucp2	uncoupling protein 2 (mitochondrial, proton carrier) [Source:MGI Symbol;Acc:MGI:109354]
110596	ENSMUST00000109426	-11.9465	2.05227e-06	DOWN	ENSMUSG00000021662	P97433	Arhgef28	Rho guanine nucleotide exchange factor (GEF) 28
56531	ENSMUST00000164558	-11.644	4.40316e-06	DOWN	ENSMUSG00000021244	D3YWX2	Ylpm1	YLP motif containing 1 [Source:MGI Symbol;Acc:MGI:1926195]
19663	ENSMUST00000182987	-11.3657	2.56757e-06	DOWN	ENSMUSG00000031586	Q9WVB0	Rbpms	RNA-binding protein with multiple splicing [Source:UniProtKB/Swiss-Prot;Acc:Q9WVB0]
16886	ENSMUST00000101638	-11.2752	7.9654e-06	DOWN	ENSMUSG00000020451	O54785	Limk2	LIM domain kinase 2 [Source:UniProtKB/Swiss-Prot;Acc:O54785]
14225	ENSMUST00000142271	-10.9246	0.000375667	DOWN	ENSMUSG00000032966	P26883	Fkbp1a	Peptidyl-prolyl cis-trans isomerase FKBP1A [Source:UniProtKB/Swiss-Prot;Acc:P26883]
93701	ENSMUST00000195363	-10.9239	8.35545e-07	DOWN	ENSMUSG00000103585	Q91XX6	Pcdhgb4	protocadherin gamma subfamily B, 4 [Source:MGI Symbol;Acc:MGI:1935173]
71750	ENSMUST00000166820	-10.8926	1.62196e-05	DOWN	ENSMUSG00000025404	Q80TM6	R3hdm2	R3H domain-containing protein 2 [Source:UniProtKB/Swiss-Prot;Acc:Q80TM6]
142980	ENSMUST00000209772	-10.8853	3.12198e-05	DOWN	ENSMUSG00000031639	Q99MB1	Tlr3	Mus musculus toll-like receptor 3 (Tlr3), transcript variant 3, mRNA. [Source:RefSeq mRNA;Acc:NM_001357317]
74569	ENSMUST00000094801	-10.6974	0.000114356	DOWN	ENSMUSG00000027194	Q8C1H7	Ttc17	tetratricopeptide repeat domain 17 [Source:MGI Symbol;Acc:MGI:1921819]
102566	ENSMUST00000214283	-10.4114	3.67544e-06	DOWN	ENSMUSG00000037949	Q8BH79	Ano10	Anoctamin-10 [Source:UniProtKB/Swiss-Prot;Acc:Q8BH79]
110454	ENSMUST00000023248	-10.1907	0.0109533	DOWN	ENSMUSG00000075602	P05533	Ly6a	Lymphocyte antigen 6A-2/6E-1 [Source:UniProtKB/Swiss-Prot;Acc:P05533]
50791	ENSMUST00000197443	-9.95125	0.00144425	DOWN	ENSMUSG00000040003	Q9WVQ1	Magi2	Membrane-associated guanylate kinase, WW and PDZ domain-containing protein 2 [Source:UniProtKB/Swiss-Prot;Acc:Q9WVQ1]
14683	ENSMUST00000087871	-9.76537	0.000462735	DOWN	ENSMUSG00000027523	P63094	Gnas	GNAS (guanine nucleotide binding protein, alpha stimulating) complex locus [Source:MGI Symbol;Acc:MGI:95777]
211329	ENSMUST00000092610	-9.74452	0.000270633	DOWN	ENSMUSG00000039697	Q6DFV7	Ncoa7	nuclear receptor coactivator 7 [Source:MGI Symbol;Acc:MGI:2444847]
216760	ENSMUST00000020830	-9.71632	0.000823724	DOWN	ENSMUSG00000020522	A0A0R4J1C7	Mfap3	microfibril associated protein 3 [Source:HGNC Symbol;Acc:HGNC:7034]
18616	ENSMUST00000150182	-9.51842	0.000391413	DOWN	ENSMUSG00000002265	Q3URU2	Peg3	Paternally-expressed 3 protein [Source:UniProtKB/Swiss-Prot;Acc:Q3URU2]
78826	ENSMUST00000150494	-9.46354	6.45278e-05	DOWN	ENSMUSG00000050921	Q8BFU7	P2ry10	Mus musculus purinergic receptor P2Y, G-protein coupled 10 (P2ry10), transcript variant 2, mRNA. [Source:RefSeq mRNA;Acc:NM_001357810]
12505	ENSMUST00000111192	-9.42557	2.68176e-06	DOWN	ENSMUSG00000005087	P15379	Cd44	CD44 molecule (Indian blood group) [Source:HGNC Symbol;Acc:HGNC:1681]
67776	ENSMUST00000118144	-9.3971	0.0126002	DOWN	ENSMUSG00000023186	Q99KC8	Vwa5a	von Willebrand factor A domain containing 5A [Source:MGI Symbol;Acc:MGI:1915026]
212528	ENSMUST00000109768	-9.33181	3.91374e-06	DOWN	ENSMUSG00000001909	A0A0R4IZW7	Trmt1	tRNA methyltransferase 1 [Source:MGI Symbol;Acc:MGI:1289155]
70579	ENSMUST00000027736	-9.29762	5.33387e-06	DOWN	ENSMUSG00000116275	Q3UL31	Zc3h11a	Zinc finger CCCH domain-containing protein 11A [Source:UniProtKB/Swiss-Prot;Acc:Q6NZF1]
12297	ENSMUST00000109150	-9.25784	1.97281e-05	DOWN	ENSMUSG00000003352	P54285	Cacnb3	calcium channel, voltage-dependent, beta 3 subunit
230674	ENSMUST00000106403	-9.23282	2.37736e-06	DOWN	ENSMUSG00000033326	Q8BW72	Kdm4a	Lysine-specific demethylase 4A [Source:UniProtKB/Swiss-Prot;Acc:Q8BW72]
208748	ENSMUST00000170096	-9.20109	0.0157197	DOWN	ENSMUSG00000033361	Q6PAQ9	Prrg3	Transmembrane gamma-carboxyglutamic acid protein 3 [Source:UniProtKB/Swiss-Prot;Acc:Q6PAQ9]
114128	ENSMUST00000226437	-9.18315	0.0114977	DOWN	ENSMUSG00000022257	B2CZK6	Laptm4b	lysosomal-associated protein transmembrane 4B
109135	ENSMUST00000205025	-9.14787	3.95159e-06	DOWN	ENSMUSG00000030231	E9Q6H8	Plekha5	pleckstrin homology domain containing A5 [Source:HGNC Symbol;Acc:HGNC:30036]
11596	ENSMUST00000174069	-9.14339	0.00940058	DOWN	ENSMUSG00000015452	Q62151	Ager	Advanced glycosylation end product-specific receptor [Source:UniProtKB/Swiss-Prot;Acc:Q62151]
22290	ENSMUST00000137048	-9.13322	1.7176e-06	DOWN	ENSMUSG00000068457	G3X9F2	Uty	ubiquitously transcribed tetratricopeptide repeat gene, Y chromosome [Source:MGI Symbol;Acc:MGI:894810]
27395	ENSMUST00000146665	-9.12674	4.75638e-06	DOWN	ENSMUSG00000033845	Q9CPR5	Mrpl15	39S ribosomal protein L15, mitochondrial [Source:UniProtKB/Swiss-Prot;Acc:Q9CPR5]
19079	ENSMUST00000031486	-9.09429	0.0015996	DOWN	ENSMUSG00000029513	Q9R078	Prkab1	protein kinase, AMP-activated, beta 1 non-catalytic subunit [Source:MGI Symbol;Acc:MGI:1336167]
69257	ENSMUST00000183463	-9.05994	0.000587623	DOWN	ENSMUSG00000037174	Q9JHC9	Elf2	ETS-related transcription factor Elf-2 [Source:UniProtKB/Swiss-Prot;Acc:Q9JHC9]
72479	ENSMUST00000030078	-9.04441	0.00155918	DOWN	ENSMUSG00000028383	Q2TPA8	Hsdl2	Hydroxysteroid dehydrogenase-like protein 2 [Source:UniProtKB/Swiss-Prot;Acc:Q2TPA8]
69116	ENSMUST00000129949	-9.01418	0.0259286	DOWN	ENSMUSG00000066036	A2AN08	Ubr4	ubiquitin protein ligase E3 component n-recognin 4 [Source:MGI Symbol;Acc:MGI:1916366]
17283	ENSMUST00000078137	-8.99489	0.000151597	DOWN	ENSMUSG00000024947	O88559	Men1	Menin [Source:UniProtKB/Swiss-Prot;Acc:O88559]
71745	ENSMUST00000162301	-8.93514	0.0129927	DOWN	ENSMUSG00000024231	Q9D4H8	Cul2	Cullin-2 [Source:UniProtKB/Swiss-Prot;Acc:Q9D4H8]
225929	ENSMUST00000061618	-8.90976	0.020191	DOWN	ENSMUSG00000046139	Q3TC46	Patl1	protein associated with topoisomerase II homolog 1 (yeast)
51796	ENSMUST00000131301	-8.88044	7.60136e-06	DOWN	ENSMUSG00000028809	E9PUK6	Srrm1	serine and arginine repetitive matrix 1 [Source:HGNC Symbol;Acc:HGNC:16638]
74569	ENSMUST00000055081	-8.87785	0.0260158	DOWN	ENSMUSG00000027194	Q8C1H7	Ttc17	tetratricopeptide repeat domain 17 [Source:MGI Symbol;Acc:MGI:1921819]
228852	ENSMUST00000052927	-8.8104	0.0032048	DOWN	ENSMUSG00000037754	Q8VHQ3	Ppp1r16b	protein phosphatase 1, regulatory (inhibitor) subunit 16B [Source:MGI Symbol;Acc:MGI:2151841]
216805	ENSMUST00000091246	-8.69746	1.63264e-05	DOWN	ENSMUSG00000032633	Q8QZS3	Flcn	Folliculin [Source:UniProtKB/Swiss-Prot;Acc:Q8QZS3]
20617	ENSMUST00000163779	-8.6121	0.00324937	DOWN	ENSMUSG00000025889	O55042	Snca	Alpha-synuclein [Source:UniProtKB/Swiss-Prot;Acc:O55042]
66595	ENSMUST00000123807	-8.60941	1.06195e-06	DOWN	ENSMUSG00000032567	Q8BIR2	Aste1	1 [Source:UniProtKB/Swiss-Prot;Acc:Q8BIR2]
235587	ENSMUST00000123555	-8.52554	0.000570947	DOWN	ENSMUSG00000023249	Q3UGL7	Parp3	poly(ADP-ribose) polymerase family member 3 [Source:HGNC Symbol;Acc:HGNC:273]
71750	ENSMUST00000077046	-8.46022	0.00506046	DOWN	ENSMUSG00000025404	Q80TM6	R3hdm2	R3H domain-containing protein 2 [Source:UniProtKB/Swiss-Prot;Acc:Q80TM6]
69601	ENSMUST00000156669	-8.444	1.26359e-05	DOWN	ENSMUSG00000026883	Q3UHC7	Dab2ip	Disabled homolog 2-interacting protein [Source:UniProtKB/Swiss-Prot;Acc:Q3UHC7]
59046	ENSMUST00000168166	-8.44177	0.0151099	DOWN	ENSMUSG00000007656	P56212	Arpp19	Mus musculus cAMP-regulated phosphoprotein 19 (Arpp19), transcript variant 6, mRNA. [Source:RefSeq mRNA;Acc:NM_001357881]
19089	ENSMUST00000115331	-8.43663	4.64709e-06	DOWN	ENSMUSG00000003402	O08795	Prkcsh	protein kinase C substrate 80K-H [Source:MGI Symbol;Acc:MGI:107877]
208111	ENSMUST00000187616	-8.4317	2.9039e-06	DOWN	ENSMUSG00000074158	E9Q981	Zfp976	zinc finger protein 976 [Source:MGI Symbol;Acc:MGI:3036263]
108907	ENSMUST00000028771	-8.41556	0.000865008	DOWN	ENSMUSG00000027306	Q9ERH4	Nusap1	Nucleolar and spindle-associated protein 1 [Source:UniProtKB/Swiss-Prot;Acc:Q9ERH4]
66349	ENSMUST00000077338	-8.35822	2.86851e-05	DOWN	ENSMUSG00000057229	Q9D7K5	Dmac2	Distal membrane-arm assembly complex protein 2 [Source:UniProtKB/Swiss-Prot;Acc:Q9D7K5]
214048	ENSMUST00000191805	-8.35216	0.000218482	DOWN	ENSMUSG00000025762	Q8R3F0	Larp1b	La ribonucleoprotein domain family, member 1B
73385	ENSMUST00000177768	-8.30336	0.0020764	DOWN	ENSMUSG00000095595	Q8BR63	1700047I17Rik1	family with sequence similarity 177, member A
20358	ENSMUST00000135790	-8.27132	0.0254738	DOWN	ENSMUSG00000019647	O35464	Sema6a	Semaphorin-6A [Source:UniProtKB/Swiss-Prot;Acc:O35464]
13528	ENSMUST00000077930	-8.24221	0.0242925	DOWN	ENSMUSG00000071454	Q8C8Z9	Dtnb	Dystrobrevin beta [Source:UniProtKB/Swiss-Prot;Acc:O70585]
211535	ENSMUST00000210602	-8.22837	3.16952e-06	DOWN	ENSMUSG00000040189	Q3UX62	Ccdc114	Coiled-coil domain-containing protein 114 [Source:UniProtKB/Swiss-Prot;Acc:Q3UX62]
320487	ENSMUST00000040583	-8.20873	0.0245461	DOWN	ENSMUSG00000035181	Q5PRF0	Heatr5a	HEAT repeat containing 5A
192185	ENSMUST00000030939	-8.18908	0.0232495	DOWN	ENSMUSG00000029063	Q3UGI1	Nadk	NAD kinase [Source:UniProtKB/Swiss-Prot;Acc:P58058]
71777	ENSMUST00000115389	-8.15567	3.91685e-06	DOWN	ENSMUSG00000029670	Q8VEK6	Ing3	Inhibitor of growth protein 3 [Source:UniProtKB/Swiss-Prot;Acc:Q8VEK6]
108116	ENSMUST00000026897	-8.12519	0.00334397	DOWN	ENSMUSG00000025790	Q8R3L5	Slco3a1	Solute carrier organic anion transporter family member 3A1 [Source:UniProtKB/Swiss-Prot;Acc:Q8R3L5]
16423	ENSMUST00000229101	-8.11554	0.0010588	DOWN	ENSMUSG00000055447	Q61735	Cd47	Leukocyte surface antigen CD47 [Source:UniProtKB/Swiss-Prot;Acc:Q61735]
231807	ENSMUST00000159123	-8.11534	0.00010701	DOWN	ENSMUSG00000036948	Q3UTZ3	BC037034	chromosome 7 open reading frame 43 [Source:HGNC Symbol;Acc:HGNC:25604]
320197	ENSMUST00000100514	-8.09931	0.0036252	DOWN	ENSMUSG00000044197	Q8C3F6,D3Z262,Q99LE2	Gpr146	RIKEN cDNA D830046C22 gene
110147	ENSMUST00000013931	-8.06641	0.00856929	DOWN	ENSMUSG00000013787	Q9Z148	Ehmt2	Histone-lysine N-methyltransferase EHMT2 [Source:UniProtKB/Swiss-Prot;Acc:Q9Z148]
66138	ENSMUST00000202478	-8.06425	7.55528e-05	DOWN	ENSMUSG00000005378	Q148S9	Bud23	Probable 18S rRNA (guanine-N(7))-methyltransferase [Source:UniProtKB/Swiss-Prot;Acc:Q9CY21]
232987	ENSMUST00000205658	-8.03691	5.44165e-06	DOWN	ENSMUSG00000063439	Q3UK10	B9d2	B9 domain-containing protein 2 [Source:UniProtKB/Swiss-Prot;Acc:Q3UK10]
70508	ENSMUST00000089399	-8.02597	0.010482	DOWN	ENSMUSG00000022641	Q8VBW5	Bbx	HMG box transcription factor BBX [Source:UniProtKB/Swiss-Prot;Acc:Q8VBW5]
77569	ENSMUST00000038188	-8.01103	0.0164054	DOWN	ENSMUSG00000037736	Q3UH68	Limch1	LIM and calponin homology domains-containing protein 1 [Source:UniProtKB/Swiss-Prot;Acc:Q3UH68]
94242	ENSMUST00000105999	-7.93826	0.0120027	DOWN	ENSMUSG00000028776	Q99JR5	Tinagl1	Tubulointerstitial nephritis antigen-like [Source:UniProtKB/Swiss-Prot;Acc:Q99JR5]
72179	ENSMUST00000117537	-7.93371	7.22415e-06	DOWN	ENSMUSG00000032507	Q4VA21	Fbxl2	F-box/LRR-repeat protein 2 [Source:UniProtKB/Swiss-Prot;Acc:Q8BH16]
258571	ENSMUST00000213865	-7.91337	0.00669703	DOWN	ENSMUSG00000045392	Q8VFK5	Olfr1033	olfactory receptor 1033
72061	ENSMUST00000159152	-7.87159	0.000276725	DOWN	ENSMUSG00000021458	Q8BXQ6	2010111I01Rik	chromosome 9 open reading frame 3 [Source:HGNC Symbol;Acc:HGNC:1361]
11938	ENSMUST00000031423	-7.83832	0.0234069	DOWN	ENSMUSG00000029467	Q5DTI2	Atp2a2	Sarcoplasmic/endoplasmic reticulum calcium ATPase 2 [Source:UniProtKB/Swiss-Prot;Acc:O55143]
69674	ENSMUST00000106506	-7.83812	0.0188852	DOWN	ENSMUSG00000020743	Q3UBZ5	Mif4gd	MIF4G domain-containing protein [Source:UniProtKB/Swiss-Prot;Acc:Q3UBZ5]
16565	ENSMUST00000130864	-7.79992	0.0177627	DOWN	ENSMUSG00000041642	Q9QXL1	Kif21b	kinesin family member 21B [Source:HGNC Symbol;Acc:HGNC:29442]
14593	ENSMUST00000223174	-7.77722	9.44413e-06	DOWN	ENSMUSG00000021302	Q9WTN0	Ggps1	geranylgeranyl diphosphate synthase 1
214601	ENSMUST00000073067	-7.75698	0.01346	DOWN	ENSMUSG00000032806	A0A158SIT6	Slc10a3	solute carrier family 10 (sodium/bile acid cotransporter family), member 3 [Source:MGI Symbol;Acc:MGI:95048]
67203	ENSMUST00000117958	-7.72788	8.59789e-05	DOWN	ENSMUSG00000022678	Q9CZA6	Nde1	Nuclear distribution 1 [Source:UniProtKB/Swiss-Prot;Acc:Q9CZA6]
69179	ENSMUST00000006701	-7.72433	0.0124954	DOWN	ENSMUSG00000006526	Q3UF25	Tmem110	Store-operated calcium entry regulator STIMATE [Source:UniProtKB/Swiss-Prot;Acc:Q3UF25]
14173	ENSMUST00000138563	-7.68372	0.0148009	DOWN	ENSMUSG00000037225	P15655	Fgf2	Fibroblast growth factor 2 [Source:UniProtKB/Swiss-Prot;Acc:P15655]
20591	ENSMUST00000112588	-7.62068	0.0197654	DOWN	ENSMUSG00000025332	P41230	Kdm5c	Lysine-specific demethylase 5C [Source:UniProtKB/Swiss-Prot;Acc:P41230]
71910	ENSMUST00000210629	-7.60833	3.67083e-06	DOWN	ENSMUSG00000031570	Q3UMZ3	Plpp5	Phospholipid phosphatase 5 [Source:UniProtKB/Swiss-Prot;Acc:Q3UMZ3]
59025	ENSMUST00000116669	-7.55067	0.0136318	DOWN	ENSMUSG00000047879	Q9JMA1	Usp14	ubiquitin specific peptidase 14 [Source:MGI Symbol;Acc:MGI:1928898]
74159	ENSMUST00000028121	-7.48925	0.00653079	DOWN	ENSMUSG00000026781	Q5CZX6	Acbd5	acyl-Coenzyme A binding domain containing 5 [Source:MGI Symbol;Acc:MGI:1921409]
27981	ENSMUST00000145364	-7.46973	0.015188	DOWN	ENSMUSG00000037266	Q3UC65	Rsrp1	Arginine/serine-rich protein 1 [Source:UniProtKB/Swiss-Prot;Acc:Q3UC65]
107527	ENSMUST00000194296	-7.44603	0.0161547	DOWN	ENSMUSG00000070942	Q9ERS7	Il1rl2	Mus musculus interleukin 1 receptor-like 2 (Il1rl2), transcript variant 2, mRNA. [Source:RefSeq mRNA;Acc:NM_001356478]
75686	ENSMUST00000190375	-7.44059	1.88193e-05	DOWN	ENSMUSG00000032565	Q6P3D0	Nudt16	U8 snoRNA-decapping enzyme [Source:UniProtKB/Swiss-Prot;Acc:Q6P3D0]
227693	ENSMUST00000044751	-7.43168	0.0127548	DOWN	ENSMUSG00000039686	Q80ZJ6	Zer1	zyg-11 related, cell cycle regulator [Source:MGI Symbol;Acc:MGI:2442511]
72055	ENSMUST00000045402	-7.42709	0.0176244	DOWN	ENSMUSG00000061306	Q5I012	Slc38a10	Putative sodium-coupled neutral amino acid transporter 10 [Source:UniProtKB/Swiss-Prot;Acc:Q5I012]
228911	ENSMUST00000109157	-7.41208	0.0166717	DOWN	ENSMUSG00000047907	Q68FE9	Tshz2	teashirt zinc finger family member 2 [Source:MGI Symbol;Acc:MGI:2153084]
320405	ENSMUST00000156986	-7.40699	0.00693886	DOWN	ENSMUSG00000017978	Q8BYR5	Cadps2	Calcium-dependent secretion activator 2 [Source:UniProtKB/Swiss-Prot;Acc:Q8BYR5]
51810	ENSMUST00000037748	-7.37755	0.0275054	DOWN	ENSMUSG00000039630	Q8VEK3	Hnrnpu	Heteroous nuclear ribonucleoprotein U [Source:UniProtKB/Swiss-Prot;Acc:Q8VEK3]
217331	ENSMUST00000150759	-7.37305	0.00508892	DOWN	ENSMUSG00000020770	Q8BL48	Unk	unkempt family zinc finger [Source:MGI Symbol;Acc:MGI:2442456]
235587	ENSMUST00000067218	-7.36702	6.87219e-05	DOWN	ENSMUSG00000023249	Q3UGL7	Parp3	poly(ADP-ribose) polymerase family member 3 [Source:HGNC Symbol;Acc:HGNC:273]
633640	ENSMUST00000178948	-7.33991	2.83404e-05	DOWN	ENSMUSG00000074634	Q8VDR5	Tmem267	transmembrane protein 267 [Source:MGI Symbol;Acc:MGI:3648543]
20054	ENSMUST00000068408	-7.33059	0.00532572	DOWN	ENSMUSG00000063457	P62843	Rps15	40S ribosomal protein S15 [Source:UniProtKB/Swiss-Prot;Acc:P62843]
170755	ENSMUST00000188738	-7.30131	0.0278376	DOWN	ENSMUSG00000025915	Q9ERE3	Sgk3	serum/glucocorticoid regulated kinase 3 [Source:MGI Symbol;Acc:MGI:2182368]
227334	ENSMUST00000040783	-7.28981	0.013973	DOWN	ENSMUSG00000005501	Q8BWR4	Usp40	ubiquitin specific peptidase 40 [Source:MGI Symbol;Acc:MGI:2443184]
74168	ENSMUST00000225968	-7.26706	0.0141573	DOWN	ENSMUSG00000025157	Q9ESG8	Zdhhc16	zinc finger, DHHC domain containing 16
19356	ENSMUST00000177848	-7.24402	0.0162214	DOWN	ENSMUSG00000021635	Q3UYY2	Rad17	RAD17 checkpoint clamp loader component
338359	ENSMUST00000020273	-7.23966	0.00658418	DOWN	ENSMUSG00000020079	Q80YD1	Supv3l1	ATP-dependent RNA helicase SUPV3L1, mitochondrial [Source:UniProtKB/Swiss-Prot;Acc:Q80YD1]
15040	ENSMUST00000174161	-7.22611	2.17746e-05	DOWN	ENSMUSG00000067212	P06339	H2-T23	H-2 class I histocompatibility antigen, D-37 alpha chain [Source:UniProtKB/Swiss-Prot;Acc:P06339]
22063	ENSMUST00000186235	-7.21514	0.00030966	DOWN	ENSMUSG00000032839	Q61056	Trpc1	transient receptor potential cation channel, subfamily C, member 1 [Source:MGI Symbol;Acc:MGI:109528]
170643	ENSMUST00000107618	-7.18252	0.0269493	DOWN	ENSMUSG00000041734	Q80W68	Kirrel	Kin of IRRE-like protein 1 [Source:UniProtKB/Swiss-Prot;Acc:Q80W68]
224893	ENSMUST00000054780	-7.17619	0.00506601	DOWN	ENSMUSG00000003198	Q91VM8	Zfp959	zinc finger protein 959 [Source:MGI Symbol;Acc:MGI:2385058]
67071	ENSMUST00000113428	-7.16106	0.0090783	DOWN	ENSMUSG00000025665	Q7TPS0	Rps6ka6	ribosomal protein S6 kinase polypeptide 6 [Source:MGI Symbol;Acc:MGI:1914321]
20592	ENSMUST00000188910	-7.13665	0.0173773	DOWN	ENSMUSG00000056673	Q62240	Kdm5d	Lysine-specific demethylase 5D [Source:UniProtKB/Swiss-Prot;Acc:Q62240]
20535	ENSMUST00000080067	-7.08796	0.0420667	DOWN	ENSMUSG00000028962	P13808	Slc4a2	solute carrier family 4 (anion exchanger), member 2 [Source:MGI Symbol;Acc:MGI:109351]
100561	ENSMUST00000153832	-7.0673	0.0156215	DOWN	ENSMUSG00000029416	Q91W98	Slc15a4	Solute carrier family 15 member 4 [Source:UniProtKB/Swiss-Prot;Acc:Q91W98]
100113398	ENSMUST00000218067	-7.06475	0.0402058	DOWN	ENSMUSG00000035370	Q6PAT0	Adat3	Probable inactive tRNA-specific adenosine deaminase-like protein 3 [Source:UniProtKB/Swiss-Prot;Acc:Q6PAT0]
11821	ENSMUST00000213062	-7.02154	0.000187154	DOWN	ENSMUSG00000006589	P08030	Aprt	Adenine phosphoribosyltransferase [Source:UniProtKB/Swiss-Prot;Acc:P08030]
72281	ENSMUST00000066594	-7.01912	0.0165568	DOWN	ENSMUSG00000053886	Q9D7V1	Sh2d4a	SH2 domain-containing protein 4A [Source:UniProtKB/Swiss-Prot;Acc:Q9D7V1]
76786	ENSMUST00000120083	-7.01601	0.0143653	DOWN	ENSMUSG00000028700	Q91X88	Pomgnt1	RIKEN cDNA 2510003B16 gene
54325	ENSMUST00000102673	-6.98083	0.0178811	DOWN	ENSMUSG00000006390	Q9JLJ5	Elovl1	Elongation of very long chain fatty acids protein 1 [Source:UniProtKB/Swiss-Prot;Acc:Q9JLJ5]
212127	ENSMUST00000141418	-6.97988	0.000542563	DOWN	ENSMUSG00000049504	Q5PRE5	Proser1	Proline and serine-rich protein 1 [Source:UniProtKB/Swiss-Prot;Acc:Q5PRE5]
50908	ENSMUST00000162443	-6.97426	0.00610151	DOWN	ENSMUSG00000038521	E9Q6C2	C1s1	complement component 1, s subcomponent 1 [Source:MGI Symbol;Acc:MGI:1355312]
65116	ENSMUST00000210500	-6.96411	0.00177888	DOWN	ENSMUSG00000007837	Q8R182	Prrg2	proline-rich Gla (G-carboxyglutamic acid) polypeptide 2 [Source:MGI Symbol;Acc:MGI:1929596]
18477	ENSMUST00000151129	-6.91989	0.0285477	DOWN	ENSMUSG00000028691	P35700	Prdx1	Peroxiredoxin-1 [Source:UniProtKB/Swiss-Prot;Acc:P35700]
22658	ENSMUST00000169807	-6.88683	0.00975248	DOWN	ENSMUSG00000018537	P23798	Pcgf2	Polycomb group RING finger protein 2 [Source:UniProtKB/Swiss-Prot;Acc:P23798]
70314	ENSMUST00000151304	-6.87992	0.0335679	DOWN	ENSMUSG00000030727	Q91WG2	Rabep2	Rab GTPase-binding effector protein 2 [Source:UniProtKB/Swiss-Prot;Acc:Q91WG2]
20841	ENSMUST00000169638	-6.85602	0.000978787	DOWN	ENSMUSG00000061079	O70230	Zfp143	zinc finger protein 143 [Source:MGI Symbol;Acc:MGI:1277969]
20592	ENSMUST00000186726	-6.8429	0.0130148	DOWN	ENSMUSG00000056673	Q62240	Kdm5d	Lysine-specific demethylase 5D [Source:UniProtKB/Swiss-Prot;Acc:Q62240]
70612	ENSMUST00000180286	-6.82491	0.000184013	DOWN	ENSMUSG00000027341	Q8CIB6	Tmem230	Transmembrane protein 230 [Source:UniProtKB/Swiss-Prot;Acc:Q8CIB6]
54525	ENSMUST00000223586	-6.82278	4.99132e-05	DOWN	ENSMUSG00000024743	Q9R0N7	Syt7	synaptotagmin VII
68137	ENSMUST00000211234	-6.81697	0.0451764	DOWN	ENSMUSG00000002778	Q99JH8	Kdelr1	KDEL (Lys-Asp-Glu-Leu) endoplasmic reticulum protein retention receptor 1 [Source:MGI Symbol;Acc:MGI:1915387]
57080	ENSMUST00000167084	-6.77684	0.0197258	DOWN	ENSMUSG00000023079	Q9JI57	Gtf2ird1	ral transcription factor II-I repeat domain-containing protein 1 [Source:UniProtKB/Swiss-Prot;Acc:Q9JI57]
22290	ENSMUST00000069309	-6.77516	0.0138375	DOWN	ENSMUSG00000068457	G3X9F2	Uty	ubiquitously transcribed tetratricopeptide repeat gene, Y chromosome [Source:MGI Symbol;Acc:MGI:894810]
66943	ENSMUST00000123750	-6.7717	0.00529232	DOWN	ENSMUSG00000034006	Q80XM9	Pqlc1	PQ-loop repeat-containing protein 1 [Source:UniProtKB/Swiss-Prot;Acc:Q80XM9]
20103	ENSMUST00000147435	-6.75751	0.0479958	DOWN	ENSMUSG00000012848	P97461	Rps5	ribosomal protein S5 [Source:MGI Symbol;Acc:MGI:1097682]
227695	ENSMUST00000142669	-6.75339	0.011719	DOWN	ENSMUSG00000039660	Q3UHX9	Spout1	SPOUT domain containing methyltransferase 1 [Source:MGI Symbol;Acc:MGI:106544]
26908	ENSMUST00000137006	-6.73325	0.0129664	DOWN	ENSMUSG00000069049	Q9Z0N2	Eif2s3y	Eukaryotic translation initiation factor 2 subunit 3, Y-linked [Source:UniProtKB/Swiss-Prot;Acc:Q9Z0N2]
231712	ENSMUST00000152265	-6.71941	0.000433848	DOWN	ENSMUSG00000042726	Q3UDK1	Trafd1	TRAF-type zinc finger domain-containing protein 1 [Source:UniProtKB/Swiss-Prot;Acc:Q3UDK1]
208449	ENSMUST00000134415	-6.71102	0.000832359	DOWN	ENSMUSG00000040451	Q8VCQ6	Sgms1	Phosphatidylcholine:ceramide cholinephosphotransferase 1 [Source:UniProtKB/Swiss-Prot;Acc:Q8VCQ6]
13619	ENSMUST00000160163	-6.71076	0.0117735	DOWN	ENSMUSG00000040669	Q64028	Phc1	Mus musculus polyhomeotic 1 (Phc1), transcript variant 5, mRNA. [Source:RefSeq mRNA;Acc:NM_001355215]
228608	ENSMUST00000110183	-6.71028	0.000524701	DOWN	ENSMUSG00000027333	Q99K82	Smox	spermine oxidase [Source:MGI Symbol;Acc:MGI:2445356]
66971	ENSMUST00000028990	-6.70839	0.0218411	DOWN	ENSMUSG00000027487	Q8BTW8	Cdk5rap1	CDK5 regulatory subunit-associated protein 1 [Source:UniProtKB/Swiss-Prot;Acc:Q8BTW8]
269400	ENSMUST00000098971	-6.69661	0.0173806	DOWN	ENSMUSG00000038685	Q0VGM9	Rtel1	Regulator of telomere elongation helicase 1 [Source:UniProtKB/Swiss-Prot;Acc:Q0VGM9]
212555	ENSMUST00000139840	-6.68938	0.00114144	DOWN	ENSMUSG00000028744	Q8C4N4	Pqlc2	PQ loop repeat containing 2 [Source:MGI Symbol;Acc:MGI:2384837]
117146	ENSMUST00000130169	-6.67926	0.0314064	DOWN	ENSMUSG00000029577	Q9ES34	Ube3b	ubiquitin protein ligase E3B [Source:MGI Symbol;Acc:MGI:1891295]
15413	ENSMUST00000049272	-6.6767	0.018865	DOWN	ENSMUSG00000038700	P09079	Hoxb5	Homeobox protein Hox-B5 [Source:UniProtKB/Swiss-Prot;Acc:P09079]
214627	ENSMUST00000125043	-6.65807	3.46225e-05	DOWN	ENSMUSG00000036779	Q68ED3	Papd5	poly(A) RNA polymerase D5, non-canonical [Source:HGNC Symbol;Acc:HGNC:30758]
212974	ENSMUST00000164337	-6.6531	0.0221042	DOWN	ENSMUSG00000062031	Q8BP56	Pgghg	Protein-glucosylgalactosylhydroxylysine glucosidase [Source:UniProtKB/Swiss-Prot;Acc:Q8BP56]
51796	ENSMUST00000154788	-6.65069	0.00186256	DOWN	ENSMUSG00000028809	E9PUK6	Srrm1	serine and arginine repetitive matrix 1 [Source:HGNC Symbol;Acc:HGNC:16638]
24056	ENSMUST00000140002	-6.61391	0.00469398	DOWN	ENSMUSG00000021892	Q9Z131	Sh3bp5	SH3-domain binding protein 5 (BTK-associated) [Source:MGI Symbol;Acc:MGI:1344391]
68262	ENSMUST00000170858	-6.60159	0.00981181	DOWN	ENSMUSG00000023827	Q8K4X7	Agpat4	1-acyl-sn-glycerol-3-phosphate acyltransferase delta [Source:UniProtKB/Swiss-Prot;Acc:Q8K4X7]
223664	ENSMUST00000137649	-6.59347	0.011979	DOWN	ENSMUSG00000033728	Q8VC16	Lrrc14	Mus musculus leucine rich repeat containing 14 (Lrrc14), transcript variant 4, mRNA. [Source:RefSeq mRNA;Acc:NM_001358893]
13619	ENSMUST00000161739	-6.59128	0.0179459	DOWN	ENSMUSG00000040669	Q64028	Phc1	Mus musculus polyhomeotic 1 (Phc1), transcript variant 5, mRNA. [Source:RefSeq mRNA;Acc:NM_001355215]
170787	ENSMUST00000128908	-6.57492	0.00178273	DOWN	ENSMUSG00000062906	Q6P3E7	Hdac10	Histone deacetylase 10 [Source:UniProtKB/Swiss-Prot;Acc:Q6P3E7]
67387	ENSMUST00000118059	-6.56446	0.00679272	DOWN	ENSMUSG00000026111	Q9CQ61	Unc50	unc-50 homolog (C. elegans) [Source:MGI Symbol;Acc:MGI:1914637]
15469	ENSMUST00000107843	-6.54327	0.000586422	DOWN	ENSMUSG00000109324	Q9JIF0	Prmt1	protein arginine N-methyltransferase 1 [Source:MGI Symbol;Acc:MGI:107846]
76954	ENSMUST00000084738	-6.53714	0.0231	DOWN	ENSMUSG00000031024	Q924W7	St5	Suppression of tumorigenicity 5 protein [Source:UniProtKB/Swiss-Prot;Acc:Q924W7]
73681	ENSMUST00000019927	-6.52939	0.00974608	DOWN	ENSMUSG00000019792	Q9CWH5	Trmt11	tRNA methyltransferase 11 [Source:MGI Symbol;Acc:MGI:1920931]
22290	ENSMUST00000157073	-6.52221	0.0112158	DOWN	ENSMUSG00000068457	G3X9F2	Uty	ubiquitously transcribed tetratricopeptide repeat gene, Y chromosome [Source:MGI Symbol;Acc:MGI:894810]
217325	ENSMUST00000103032	-6.52149	0.00379997	DOWN	ENSMUSG00000020782	Q8BVC8	Llgl2	Lethal(2) giant larvae protein homolog 2 [Source:UniProtKB/Swiss-Prot;Acc:Q3TJ91]
71148	ENSMUST00000151588	-6.52131	0.0012506	DOWN	ENSMUSG00000028522	Q5UAK0	Mier1	Mesoderm induction early response protein 1 [Source:UniProtKB/Swiss-Prot;Acc:Q5UAK0]
225642	ENSMUST00000025395	-6.51346	0.0106959	DOWN	ENSMUSG00000024517	Q8R1I2	Grp	Gastrin-releasing peptide Neuromedin-C [Source:UniProtKB/Swiss-Prot;Acc:Q8R1I2]
433700	ENSMUST00000084646	-6.5083	0.0109794	DOWN	ENSMUSG00000066196	Q3V0Q6	Spag8	Sperm-associated antigen 8 [Source:UniProtKB/Swiss-Prot;Acc:Q3V0Q6]
29806	ENSMUST00000026269	-6.49589	0.009618	DOWN	ENSMUSG00000025239	Q9QXD8	Limd1	LIM domain-containing protein 1 [Source:UniProtKB/Swiss-Prot;Acc:Q9QXD8]
26908	ENSMUST00000091197	-6.48982	0.0146724	DOWN	ENSMUSG00000069049	Q9Z0N2	Eif2s3y	Eukaryotic translation initiation factor 2 subunit 3, Y-linked [Source:UniProtKB/Swiss-Prot;Acc:Q9Z0N2]
110058	ENSMUST00000203465	-6.48399	0.0132146	DOWN	ENSMUSG00000058420	Q920M7	Syt17	Synaptotagmin-17 [Source:UniProtKB/Swiss-Prot;Acc:Q920M7]
218103	ENSMUST00000006786	-6.46656	0.00689484	DOWN	ENSMUSG00000036110	Q5SZA1	Slc17a2	solute carrier family 17 (sodium phosphate), member 2 [Source:MGI Symbol;Acc:MGI:2443098]
20403	ENSMUST00000217981	-6.45623	0.0237048	DOWN	ENSMUSG00000020640	B2RR82	Itsn2	intersectin 2
67980	ENSMUST00000173927	-6.44591	7.53986e-05	DOWN	ENSMUSG00000029209	Q9CRC9	Gnpda2	glucosamine-6-phosphate deaminase 2 [Source:MGI Symbol;Acc:MGI:1915230]
66985	ENSMUST00000133763	-6.43357	2.73538e-05	DOWN	ENSMUSG00000038618	Q9DD19	Rassf7	Ras association domain-containing protein 7 [Source:UniProtKB/Swiss-Prot;Acc:Q9DD19]
72727	ENSMUST00000096243	-6.42343	0.0216381	DOWN	ENSMUSG00000071649	P58158	B3gat3	beta-1,3-glucuronyltransferase 3 (glucuronosyltransferase I)
55989	ENSMUST00000027174	-6.42176	0.0189767	DOWN	ENSMUSG00000026020	Q6DFW4	Nop58	Nucleolar protein 58 [Source:UniProtKB/Swiss-Prot;Acc:Q6DFW4]
15476	ENSMUST00000053116	-6.41241	0.0256774	DOWN	ENSMUSG00000051022	O35310	Hs3st1	Heparan sulfate glucosamine 3-O-sulfotransferase 1 [Source:UniProtKB/Swiss-Prot;Acc:O35310]
23971	ENSMUST00000200527	-6.4093	6.67947e-06	DOWN	ENSMUSG00000028032	Q60967	Papss1	Bifunctional 3'-phosphoadenosine 5'-phosphosulfate synthase 1 Sulfate adenylyltransferase Adenylyl-sulfate kinase [Source:UniProtKB/Swiss-Prot;Acc:Q60967]
78796	ENSMUST00000157074	-6.38714	0.0107647	DOWN	ENSMUSG00000029179	Q8BKW4	Zcchc4	zinc finger, CCHC domain containing 4 [Source:MGI Symbol;Acc:MGI:1926046]
381626	ENSMUST00000059644	-6.38414	0.0298264	DOWN	ENSMUSG00000048271	Q9CXK9	Rbm33	RNA-binding protein 33 [Source:UniProtKB/Swiss-Prot;Acc:Q9CXK9]
214804	ENSMUST00000212479	-6.36413	0.00111189	DOWN	ENSMUSG00000036863	Q8BKW6	Syde2	synapse defective Rho GTPase homolog 2 [Source:HGNC Symbol;Acc:HGNC:25841]
101568	ENSMUST00000144515	-6.34694	0.000104499	DOWN	ENSMUSG00000002205	Q3TAR6	Vrk3	vaccinia related kinase 3 [Source:MGI Symbol;Acc:MGI:2182465]
228366	ENSMUST00000176289	-6.33819	0.00726775	DOWN	ENSMUSG00000040434	Q5XPT3	Large2	LARGE xylosyl- and glucuronyltransferase 2 Xylosyltransferase LARGE2 Beta-1,3-glucuronyltransferase LARGE2 [Source:UniProtKB/Swiss-Prot;Acc:Q5XPT3]
54396	ENSMUST00000058704	-6.33476	0.020965	DOWN	ENSMUSG00000069874	Q9Z1M2	Irgm2	immunity-related GTPase family M member 2
77125	ENSMUST00000025724	-6.32513	0.0166693	DOWN	ENSMUSG00000024810	Q8BVZ5	Il33	Interleukin-33 Interleukin-33(102-266) Interleukin-33(109-266) [Source:UniProtKB/Swiss-Prot;Acc:Q8BVZ5]
67533	ENSMUST00000111623	-6.32091	0.0246374	DOWN	ENSMUSG00000016487	Q8C8U0	Ppfibp1	PTPRF interacting protein, binding protein 1 (liprin beta 1) [Source:MGI Symbol;Acc:MGI:1914783]
19663	ENSMUST00000033994	-6.32058	2.67898e-05	DOWN	ENSMUSG00000031586	Q9WVB0	Rbpms	RNA-binding protein with multiple splicing [Source:UniProtKB/Swiss-Prot;Acc:Q9WVB0]
74245	ENSMUST00000029840	-6.31594	0.0206397	DOWN	ENSMUSG00000028189	Q102J0	Ctbs	Di-N-acetylchitobiase [Source:UniProtKB/Swiss-Prot;Acc:Q8R242]
16570	ENSMUST00000220210	-6.29003	0.0159557	DOWN	ENSMUSG00000020668	Q571A6	Kif3c	kinesin family member 3C
66881	ENSMUST00000131500	-6.28822	0.000105258	DOWN	ENSMUSG00000029998	Q9CQF9	Pcyox1	Mus musculus prenylcysteine oxidase 1 (Pcyox1), transcript variant 2, mRNA. [Source:RefSeq mRNA;Acc:NM_001355687]
229905	ENSMUST00000044392	-6.26808	0.012259	DOWN	ENSMUSG00000040213	Q71RI9	Kyat3	Kynurenine--oxoglutarate transaminase 3 [Source:UniProtKB/Swiss-Prot;Acc:Q71RI9]
234214	ENSMUST00000139869	-6.25084	0.0217111	DOWN	ENSMUSG00000031626	B2RXQ9	Sorbs2	sorbin and SH3 domain containing 2 [Source:MGI Symbol;Acc:MGI:1924574]
23877	ENSMUST00000165320	-6.22652	0.0245919	DOWN	ENSMUSG00000061374	Q9WTJ4	Fiz1	Flt3-interacting zinc finger protein 1 [Source:UniProtKB/Swiss-Prot;Acc:Q9WTJ4]
216150	ENSMUST00000219791	-6.21013	0.0274526	DOWN	ENSMUSG00000020307	Q8CFI2	Cdc34	cell division cycle 34
69748	ENSMUST00000107815	-6.1944	0.0164076	DOWN	ENSMUSG00000007833	D3Z0B9	Aldh16a1	aldehyde dehydrogenase 16 family, member A1 [Source:MGI Symbol;Acc:MGI:1916998]
225049	ENSMUST00000041110	-6.19193	0.0293109	DOWN	ENSMUSG00000036918	Q8BGB2	Ttc7	tetratricopeptide repeat domain 7 [Source:MGI Symbol;Acc:MGI:1920999]
229541	ENSMUST00000098914	-6.17552	0.0226503	DOWN	ENSMUSG00000042404	Q3U1Y4	Dennd4b	Mus musculus DENN/MADD domain containing 4B (Dennd4b), transcript variant 2, mRNA. [Source:RefSeq mRNA;Acc:NM_001356483]
20404	ENSMUST00000030212	-6.17226	0.0187424	DOWN	ENSMUSG00000028488	Q62420	Sh3gl2	SH3-domain GRB2-like 2 [Source:MGI Symbol;Acc:MGI:700009]
266781	ENSMUST00000200730	-6.16437	0.00528318	DOWN	ENSMUSG00000029146	Q8BVL3	Snx17	Sorting nexin-17 [Source:UniProtKB/Swiss-Prot;Acc:Q8BVL3]
245688	ENSMUST00000033720	-6.14435	0.00619747	DOWN	ENSMUSG00000031353	Q60973	Rbbp7	retinoblastoma binding protein 7, chromatin remodeling factor [Source:MGI Symbol;Acc:MGI:1194910]
26381	ENSMUST00000110939	-6.13975	0.0154427	DOWN	ENSMUSG00000026610	P62509	Esrrg	Mus musculus estrogen-related receptor gamma (Esrrg), transcript variant 5, mRNA. [Source:RefSeq mRNA;Acc:NM_001357536]
217480	ENSMUST00000221176	-6.13437	0.00201812	DOWN	ENSMUSG00000036095	Q6NS52	Dgkb	diacylglycerol kinase, beta
12785	ENSMUST00000204890	-6.13321	0.0304012	DOWN	ENSMUSG00000030057	P53996	Cnbp	Mus musculus cellular nucleic acid binding protein (Cnbp), transcript variant 4, mRNA. [Source:RefSeq mRNA;Acc:NM_001347325]
432720	ENSMUST00000081326	-6.12255	0.0144059	DOWN	ENSMUSG00000071551	G3X9Y6	Akr1c19	aldo-keto reductase family 1, member C19 [Source:MGI Symbol;Acc:MGI:2653678]
19663	ENSMUST00000033995	-6.10802	0.00596772	DOWN	ENSMUSG00000031586	Q9WVB0	Rbpms	RNA-binding protein with multiple splicing [Source:UniProtKB/Swiss-Prot;Acc:Q9WVB0]
20602	ENSMUST00000134404	-6.10043	0.0158509	DOWN	ENSMUSG00000029478	E9Q9V3	Ncor2	Nuclear receptor corepressor 2 [Source:UniProtKB/Swiss-Prot;Acc:Q9WU42]
102443351	ENSMUST00000139104	-6.07545	0.0160849	DOWN	ENSMUSG00000070425	F8VQM8	Xntrpc	Xndc1-transient receptor potential cation channel, subfamily C, member 2 readthrough [Source:MGI Symbol;Acc:MGI:5546370]
12331	ENSMUST00000106255	-6.05778	0.0274295	DOWN	ENSMUSG00000028656	Q3UVJ2	Cap1	Mus musculus CAP, adenylate cyclase-associated protein 1 (yeast) (Cap1), transcript variant 3, mRNA. [Source:RefSeq mRNA;Acc:NM_001358035]
78796	ENSMUST00000149612	-6.05307	1.49165e-05	DOWN	ENSMUSG00000029179	Q8BKW4	Zcchc4	zinc finger, CCHC domain containing 4 [Source:MGI Symbol;Acc:MGI:1926046]
14548	ENSMUST00000114797	-6.05145	0.0229702	DOWN	ENSMUSG00000029918	Q58DZ5	Mrps33	28S ribosomal protein S33, mitochondrial [Source:UniProtKB/Swiss-Prot;Acc:Q9D2R8]
235534	ENSMUST00000119141	-6.02924	0.0257373	DOWN	ENSMUSG00000043587	Q8BHA9	Pxylp1	2-phosphoxylose phosphatase 1 [Source:UniProtKB/Swiss-Prot;Acc:Q8BHA9]
67897	ENSMUST00000148937	-6.02426	0.0161662	DOWN	ENSMUSG00000009535	Q9D0L8	Rnmt	RNA (guanine-7-) methyltransferase [Source:MGI Symbol;Acc:MGI:1915147]
11546	ENSMUST00000036126	-6.00361	0.0314299	DOWN	ENSMUSG00000036023	O88554	Parp2	poly (ADP-ribose) polymerase family, member 2
26900	ENSMUST00000187596	-5.99146	0.00700909	DOWN	ENSMUSG00000069045	Q3TUR4	Ddx3y	ATP-dependent RNA helicase DDX3Y [Source:UniProtKB/Swiss-Prot;Acc:Q62095]
67123	ENSMUST00000108060	-5.98719	0.0165397	DOWN	ENSMUSG00000028437	Q8BH48	Ubap1	ubiquitin-associated protein 1 [Source:MGI Symbol;Acc:MGI:2149543]
102626	ENSMUST00000035194	-5.97912	0.0272905	DOWN	ENSMUSG00000032577	Q3UMW7	Mapkapk3	MAP kinase-activated protein kinase 3 [Source:UniProtKB/Swiss-Prot;Acc:Q3UMW7]
20862	ENSMUST00000023619	-5.97911	0.00371205	DOWN	ENSMUSG00000022902	P35174	Stfa2	stefin A2
100043387	ENSMUST00000108981	-5.9731	0.0200267	DOWN	ENSMUSG00000078878	A2BE23	Gm14305	predicted, OTTMUSG00000016609 [Source:RefSeq peptide;Acc:NP_001093886]
57355	ENSMUST00000033334	-5.96403	0.0313589	DOWN	ENSMUSG00000031022	Q3UQ01	BC051019	Uncharacterized [Source:UniProtKB/Swiss-Prot;Acc:Q9JJR6]
27410	ENSMUST00000079594	-5.92561	0.00162057	DOWN	ENSMUSG00000024130	Q8R420	Abca3	ATP-binding cassette, sub-family A (ABC1), member 3 [Source:MGI Symbol;Acc:MGI:1351617]
18639	ENSMUST00000150783	-5.9209	0.0234051	DOWN	ENSMUSG00000025271	A2AFM9	Pfkfb1	6-phosphofructo-2-kinase/fructose-2,6-biphosphatase 1 [Source:MGI Symbol;Acc:MGI:107816]
22290	ENSMUST00000185837	-5.92009	0.0126482	DOWN	ENSMUSG00000068457	G3X9F2	Uty	ubiquitously transcribed tetratricopeptide repeat gene, Y chromosome [Source:MGI Symbol;Acc:MGI:894810]
14747	ENSMUST00000132065	-5.89293	0.012095	DOWN	ENSMUSG00000042190	Q497D3	Cmklr1	Mus musculus chemokine-like receptor 1 (Cmklr1), transcript variant 1, mRNA. [Source:RefSeq mRNA;Acc:NM_001359060]
80912	ENSMUST00000105991	-5.88844	0.0233863	DOWN	ENSMUSG00000028580	Q80U78	Pum1	pumilio RNA-binding family member 1 [Source:MGI Symbol;Acc:MGI:1931749]
64291	ENSMUST00000121888	-5.88655	0.0155742	DOWN	ENSMUSG00000044252	Q91XL9	Osbpl1a	Oxysterol-binding protein-related protein 1 [Source:UniProtKB/Swiss-Prot;Acc:Q91XL9]
66277	ENSMUST00000113530	-5.87785	0.0154201	DOWN	ENSMUSG00000030087	Q9EPW2	Klf15	Krueppel-like factor 15 [Source:UniProtKB/Swiss-Prot;Acc:Q9EPW2]
18595	ENSMUST00000168162	-5.86929	0.0449431	DOWN	ENSMUSG00000029231	P26618	Pdgfra	Mus musculus platelet derived growth factor receptor, alpha polypeptide (Pdgfra), transcript variant 4, mRNA. [Source:RefSeq mRNA;Acc:NM_001347719]
193796	ENSMUST00000141507	-5.84783	0.0345322	DOWN	ENSMUSG00000024201	Q91VY5	Kdm4b	Lysine-specific demethylase 4B [Source:UniProtKB/Swiss-Prot;Acc:Q91VY5]
213783	ENSMUST00000137111	-5.83408	0.0401479	DOWN	ENSMUSG00000040624	Q3UX37	Plekhg1	pleckstrin homology and RhoGEF domain containing G1 [Source:HGNC Symbol;Acc:HGNC:20884]
74136	ENSMUST00000103026	-5.82533	0.008594	DOWN	ENSMUSG00000020823	A8Y5H7	Sec14l1	SEC14-like protein 1 [Source:UniProtKB/Swiss-Prot;Acc:A8Y5H7]
23825	ENSMUST00000025762	-5.82507	0.0370754	DOWN	ENSMUSG00000024844	O54962	Banf1	barrier to autointegration factor 1
320538	ENSMUST00000039127	-5.82106	0.0297923	DOWN	ENSMUSG00000038538	Q80WC1	Ubn2	ubinuclein 2 [Source:MGI Symbol;Acc:MGI:2444236]
22321	ENSMUST00000173584	-5.80462	0.0221659	DOWN	ENSMUSG00000007029	Q790I0	Vars	valyl-tRNA synthetase [Source:MGI Symbol;Acc:MGI:90675]
14311	ENSMUST00000032416	-5.79054	0.0238816	DOWN	ENSMUSG00000030278	P56198	Cidec	Cell death activator CIDE-3 [Source:UniProtKB/Swiss-Prot;Acc:P56198]
14904	ENSMUST00000230023	-5.78855	0.00488467	DOWN	ENSMUSG00000042535	O08582	Gtpbp1	GTP binding protein 1
232878	ENSMUST00000119989	-5.78733	0.0260287	DOWN	ENSMUSG00000054715	Q8BGS5	Zscan22	zinc finger and SCAN domain containing 22 [Source:MGI Symbol;Acc:MGI:2443312]
66895	ENSMUST00000125037	-5.78076	0.04365	DOWN	ENSMUSG00000021411	Q8JZU6	Pxdc1	PX domain-containing protein 1 [Source:UniProtKB/Swiss-Prot;Acc:Q8JZU6]
72368	ENSMUST00000129668	-5.77604	0.0144839	DOWN	ENSMUSG00000002345	Q9D6Y4	Borcs8	BLOC-1-related complex subunit 8 [Source:UniProtKB/Swiss-Prot;Acc:Q9D6Y4]
14225	ENSMUST00000126670	-5.76849	0.00106491	DOWN	ENSMUSG00000032966	P26883	Fkbp1a	Peptidyl-prolyl cis-trans isomerase FKBP1A [Source:UniProtKB/Swiss-Prot;Acc:P26883]
12331	ENSMUST00000069533	-5.75753	0.0391716	DOWN	ENSMUSG00000028656	Q3UVJ2	Cap1	Mus musculus CAP, adenylate cyclase-associated protein 1 (yeast) (Cap1), transcript variant 3, mRNA. [Source:RefSeq mRNA;Acc:NM_001358035]
73373	ENSMUST00000028494	-5.74761	0.0237539	DOWN	ENSMUSG00000027088	Q9D9M5	Phospho2	Pyridoxal phosphate phosphatase PHOSPHO2 [Source:UniProtKB/Swiss-Prot;Acc:Q9D9M5]
269800	ENSMUST00000046064	-5.74405	0.0233314	DOWN	ENSMUSG00000038346	E9QAR1	Zfp384	zinc finger protein 384 [Source:MGI Symbol;Acc:MGI:2443203]
69807	ENSMUST00000050850	-5.73018	0.0134057	DOWN	ENSMUSG00000051675	Q3TLR3	Trim32	tripartite motif-containing 32 [Source:MGI Symbol;Acc:MGI:1917057]
70605	ENSMUST00000162134	-5.72837	0.0113885	DOWN	ENSMUSG00000006463	Q6IR37	Zdhhc24	zinc finger, DHHC domain containing 24 [Source:MGI Symbol;Acc:MGI:1917855]
70122	ENSMUST00000126353	-5.72705	0.0131166	DOWN	ENSMUSG00000028496	A2AM29	Mllt3	myeloid/lymphoid or mixed-lineage leukemia; translocated to, 3 [Source:MGI Symbol;Acc:MGI:1917372]
19739	ENSMUST00000020920	-5.72066	0.0442768	DOWN	ENSMUSG00000020599	O54828	Rgs9	Regulator of G-protein signaling 9 [Source:UniProtKB/Swiss-Prot;Acc:O54828]
68519	ENSMUST00000130999	-5.69244	0.031602	DOWN	ENSMUSG00000058070	Q05BC3	Eml1	Echinoderm microtubule-associated protein-like 1 [Source:UniProtKB/Swiss-Prot;Acc:Q05BC3]
74356	ENSMUST00000212922	-5.68238	0.0225409	DOWN	ENSMUSG00000014837	Q810A5	4931428F04Rik	Uncharacterized protein KIAA0895-like [Source:UniProtKB/Swiss-Prot;Acc:Q810A5]
280668	ENSMUST00000200170	-5.67614	0.0154519	DOWN	ENSMUSG00000072647	Q3V0H1	Adam1a	Disintegrin and metalloproteinase domain-containing protein 1a [Source:UniProtKB/Swiss-Prot;Acc:Q60813]
68731	ENSMUST00000025462	-5.66651	0.0102125	DOWN	ENSMUSG00000024570	Q6P3B9	Rbfa	ribosome binding factor A
72238	ENSMUST00000224528	-5.66368	9.48472e-05	DOWN	ENSMUSG00000023923	Q80XQ2	Tbc1d5	TBC1 domain family, member 5
218503	ENSMUST00000224231	-5.65883	0.000271619	DOWN	ENSMUSG00000041685	Q3UQN2	Fcho2	FCH domain only 2
50770	ENSMUST00000033818	-5.64797	0.00530204	DOWN	ENSMUSG00000031441	P98197	Atp11a	Probable phospholipid-transporting ATPase IH [Source:UniProtKB/Swiss-Prot;Acc:P98197]
215008	ENSMUST00000118077	-5.63528	0.0214703	DOWN	ENSMUSG00000036099	Q3ZK22	Vezt	vezatin, adherens junctions transmembrane protein [Source:MGI Symbol;Acc:MGI:2143698]
15525	ENSMUST00000020630	-5.63336	0.0405514	DOWN	ENSMUSG00000020361	Q3U2G2	Hspa4	heat shock protein 4 [Source:MGI Symbol;Acc:MGI:1342292]
12388	ENSMUST00000099941	-5.61975	0.0231318	DOWN	ENSMUSG00000034101	P30999	Ctnnd1	Mus musculus catenin (cadherin associated protein), delta 1 (Ctnnd1), transcript variant 7, mRNA. [Source:RefSeq mRNA;Acc:NM_001355065]
14727	ENSMUST00000219717	-5.60756	0.00558286	DOWN	ENSMUSG00000112023	Q549E3	Lilr4b	leukocyte immunoglobulin-like receptor, subfamily B, member 4B
170791	ENSMUST00000146549	-5.6058	0.00156602	DOWN	ENSMUSG00000027620	Q8VH51	Rbm39	RNA binding motif protein 39 [Source:MGI Symbol;Acc:MGI:2157953]
18227	ENSMUST00000183542	-5.60182	0.0485045	DOWN	ENSMUSG00000026826	Q3TYI4	Nr4a2	Nuclear receptor subfamily 4 group A member 2 [Source:UniProtKB/Swiss-Prot;Acc:Q06219]
26908	ENSMUST00000154556	-5.59577	0.0132413	DOWN	ENSMUSG00000069049	Q9Z0N2	Eif2s3y	Eukaryotic translation initiation factor 2 subunit 3, Y-linked [Source:UniProtKB/Swiss-Prot;Acc:Q9Z0N2]
321003	ENSMUST00000041609	-5.58701	0.0233894	DOWN	ENSMUSG00000022401	B7ZMP1	Xpnpep3	X-prolyl aminopeptidase 3, mitochondrial [Source:MGI Symbol;Acc:MGI:2445217]
231506	ENSMUST00000149714	-5.58116	0.0471962	DOWN	ENSMUSG00000035310	Q571G4	Lin54	Mus musculus lin-54 homolog (C. elegans) (Lin54), transcript variant 3, mRNA. [Source:RefSeq mRNA;Acc:NM_001346583]
56316	ENSMUST00000207000	-5.57846	2.71631e-05	DOWN	ENSMUSG00000053460	Q9QYC7	Ggcx	Vitamin K-dependent gamma-carboxylase [Source:UniProtKB/Swiss-Prot;Acc:Q9QYC7]
321007	ENSMUST00000024570	-5.57607	0.0246983	DOWN	ENSMUSG00000015659	Q3U213	Serac1	Protein SERAC1 [Source:UniProtKB/Swiss-Prot;Acc:Q3U213]
70552	ENSMUST00000047093	-5.57338	0.0262352	DOWN	ENSMUSG00000038637	Q8K375	Lrrc56	Leucine-rich repeat-containing protein 56 [Source:UniProtKB/Swiss-Prot;Acc:Q8K375]
228911	ENSMUST00000185239	-5.56996	0.0137267	DOWN	ENSMUSG00000047907	Q68FE9	Tshz2	teashirt zinc finger family member 2 [Source:MGI Symbol;Acc:MGI:2153084]
22634	ENSMUST00000121766	-5.55332	0.0140036	DOWN	ENSMUSG00000019817	Q9JLQ4	Plagl1	pleiomorphic adenoma gene-like 1
100986	ENSMUST00000044492	-5.54004	0.0485464	DOWN	ENSMUSG00000040407	Q70FJ1	Akap9	A-kinase anchoring protein 9 [Source:HGNC Symbol;Acc:HGNC:379]
320139	ENSMUST00000187985	-5.53793	0.0298575	DOWN	ENSMUSG00000031506	Q8BUM3	Ptpn7	Mus musculus protein tyrosine phosphatase, non-receptor type 7 (Ptpn7), transcript variant 2, mRNA. [Source:RefSeq mRNA;Acc:NM_001356382]
16885	ENSMUST00000111233	-5.53781	0.0247895	DOWN	ENSMUSG00000029674	P53668	Limk1	LIM domain kinase 1 [Source:UniProtKB/Swiss-Prot;Acc:P53668]
74685	ENSMUST00000100123	-5.5315	0.00500542	DOWN	ENSMUSG00000022759	Q14BP6	Lrrc74b	Leucine-rich repeat-containing protein 74B [Source:UniProtKB/Swiss-Prot;Acc:Q14BP6]
16800	ENSMUST00000175749	-5.53045	0.0197391	DOWN	ENSMUSG00000028059	Q60875	Arhgef2	Rho guanine nucleotide exchange factor 2 [Source:UniProtKB/Swiss-Prot;Acc:Q60875]
74117	ENSMUST00000186008	-5.52946	0.012717	DOWN	ENSMUSG00000026341	Q99JY9	Actr3	Actin-related protein 3 [Source:UniProtKB/Swiss-Prot;Acc:Q99JY9]
66077	ENSMUST00000139651	-5.51791	0.0387041	DOWN	ENSMUSG00000065990	Q9DCJ7	Aurkaip1	Aurora kinase A-interacting protein [Source:UniProtKB/Swiss-Prot;Acc:Q9DCJ7]
83433	ENSMUST00000024791	-5.51784	0.011251	DOWN	ENSMUSG00000023992	Q99NH8	Trem2	Triggering receptor expressed on myeloid cells 2 [Source:UniProtKB/Swiss-Prot;Acc:Q99NH8]
19303	ENSMUST00000152156	-5.50751	0.026316	DOWN	ENSMUSG00000029528	Q8VI36	Pxn	Paxillin [Source:UniProtKB/Swiss-Prot;Acc:Q8VI36]
74776	ENSMUST00000029644	-5.48986	0.0155536	DOWN	ENSMUSG00000028013	Q91VM9	Ppa2	pyrophosphatase (inorganic) 2 [Source:MGI Symbol;Acc:MGI:1922026]
110213	ENSMUST00000160635	-5.48305	0.0119444	DOWN	ENSMUSG00000023010	Q9D2C7	Tmbim6	transmembrane BAX inhibitor motif containing 6 [Source:MGI Symbol;Acc:MGI:99682]
20592	ENSMUST00000189069	-5.48072	0.0171371	DOWN	ENSMUSG00000056673	Q62240	Kdm5d	Lysine-specific demethylase 5D [Source:UniProtKB/Swiss-Prot;Acc:Q62240]
235956	ENSMUST00000202645	-5.47522	0.0263082	DOWN	ENSMUSG00000069208	Q91VL6	Zfp825	zinc finger protein 825 [Source:MGI Symbol;Acc:MGI:2385315]
70393	ENSMUST00000154812	-5.4749	0.0347117	DOWN	ENSMUSG00000018378	Q8R1H6,A2RS63,Q8R3V6,F2Z3X3,Q3TRP3,B7ZNF1	Cuedc1	RIKEN cDNA 2210416O15 gene
234854	ENSMUST00000213005	-5.45979	0.0269077	DOWN	ENSMUSG00000033862	Q3UMM4	Cdk10	Cyclin-dependent kinase 10 [Source:UniProtKB/Swiss-Prot;Acc:Q3UMM4]
234684	ENSMUST00000211199	-5.45796	0.0148419	DOWN	ENSMUSG00000041679	Q3UG51	Lrrc29	leucine rich repeat containing 29 [Source:HGNC Symbol;Acc:HGNC:13605]
328801	ENSMUST00000073570	-5.45689	0.0128746	DOWN	ENSMUSG00000073423	Q14A93	Zfp414	zinc finger protein 414 [Source:MGI Symbol;Acc:MGI:1915641]
74167	ENSMUST00000031250	-5.45138	0.0222384	DOWN	ENSMUSG00000029310	Q8BVU5	Nudt9	ADP-ribose pyrophosphatase, mitochondrial [Source:UniProtKB/Swiss-Prot;Acc:Q8BVU5]
71862	ENSMUST00000108261	-5.44515	0.0412962	DOWN	ENSMUSG00000037661	Q3U3F9	Gpr160	G protein-coupled receptor 160 [Source:MGI Symbol;Acc:MGI:1919112]
16594	ENSMUST00000142255	-5.43433	0.0422844	DOWN	ENSMUSG00000024862	Q91YS4	Klc2	kinesin light chain 2 [Source:HGNC Symbol;Acc:HGNC:20716]
66674	ENSMUST00000100496	-5.43255	0.0200013	DOWN	ENSMUSG00000021930	Q3TFQ1	Spryd7	SPRY domain containing 7 [Source:MGI Symbol;Acc:MGI:1913924]
66394	ENSMUST00000211465	-5.43247	0.045215	DOWN	ENSMUSG00000003421	Q9D6T0	Nosip	Nitric oxide synthase-interacting protein [Source:UniProtKB/Swiss-Prot;Acc:Q9D6T0]
14115	ENSMUST00000041544	-5.40192	0.018857	DOWN	ENSMUSG00000064080	P37889	Fbln2	Fibulin-2 [Source:UniProtKB/Swiss-Prot;Acc:P37889]
13619	ENSMUST00000081849	-5.40045	0.0126359	DOWN	ENSMUSG00000040669	Q64028	Phc1	Mus musculus polyhomeotic 1 (Phc1), transcript variant 5, mRNA. [Source:RefSeq mRNA;Acc:NM_001355215]
208146	ENSMUST00000115560	-5.3902	0.0415203	DOWN	ENSMUSG00000041215	B9EKJ4	Yeats2	YEATS domain containing 2
14057	ENSMUST00000021930	-5.38253	0.0357811	DOWN	ENSMUSG00000021474	Q99JR1	Sfxn1	sideroflexin 1
210293	ENSMUST00000190595	-5.38072	0.0449765	DOWN	ENSMUSG00000038608	A0A087WQ86	Dock10	dedicator of cytokinesis 10 [Source:HGNC Symbol;Acc:HGNC:23479]
100113398	ENSMUST00000038411	-5.37355	0.0489377	DOWN	ENSMUSG00000113640	Q6PAT0	Adat3	adenosine deaminase, tRNA-specific 3
69641	ENSMUST00000095410	-5.35568	0.00509921	DOWN	ENSMUSG00000037957	Q3UWE6	Wdr20	WD repeat domain 20 [Source:MGI Symbol;Acc:MGI:1916891]
106869	ENSMUST00000148989	-5.34828	0.0175055	DOWN	ENSMUSG00000062210	Q921Z5	Tnfaip8	Tumor necrosis factor alpha-induced protein 8 [Source:UniProtKB/Swiss-Prot;Acc:Q921Z5]
171429	ENSMUST00000193291	-5.34824	0.0127171	DOWN	ENSMUSG00000023259	Q8CIW6	Slc26a6	solute carrier family 26, member 6 [Source:MGI Symbol;Acc:MGI:2159728]
71929	ENSMUST00000154371	-5.34657	0.0269468	DOWN	ENSMUSG00000050912	Q91Z22	Tmem123	transmembrane protein 123 [Source:MGI Symbol;Acc:MGI:1919179]
231717	ENSMUST00000198271	-5.33722	0.0341643	DOWN	ENSMUSG00000044134	Q8BH49	Fam109a	Sesquipedalian-1 [Source:UniProtKB/Swiss-Prot;Acc:Q8BH49]
27660	ENSMUST00000169604	-5.32975	0.018382	DOWN	ENSMUSG00000033029	Q14AC9	1700088E04Rik	UPF0193 [Source:UniProtKB/Swiss-Prot;Acc:Q9D9S1]
234413	ENSMUST00000139781	-5.32862	0.000126656	DOWN	ENSMUSG00000052446	E9Q4R5	Zfp961	zinc finger protein 961 [Source:MGI Symbol;Acc:MGI:3583954]
76900	ENSMUST00000049908	-5.31167	0.0455025	DOWN	ENSMUSG00000070003	Q3U4B1	Ssbp4	single stranded DNA binding protein 4 [Source:MGI Symbol;Acc:MGI:1924150]
233870	ENSMUST00000205346	-5.3035	0.0478036	DOWN	ENSMUSG00000073838	Q8BFR5	Tufm	Tu translation elongation factor, mitochondrial [Source:MGI Symbol;Acc:MGI:1923686]
225898	ENSMUST00000224272	-5.30208	0.0228786	DOWN	ENSMUSG00000071647	Q8VC03	Eml3	echinoderm microtubule associated protein like 3
118453	ENSMUST00000103209	-5.302	0.0252485	DOWN	ENSMUSG00000020682	Q8CGV8	Mmp28	matrix metallopeptidase 28 (epilysin) [Source:MGI Symbol;Acc:MGI:2153062]
67839	ENSMUST00000147873	-5.2954	0.00541271	DOWN	ENSMUSG00000026930	Q6IR34	Gpsm1	Mus musculus G-protein signalling modulator 1 (AGS3-like, C. elegans) (Gpsm1), transcript variant 5, mRNA. [Source:RefSeq mRNA;Acc:NM_001355575]
227545	ENSMUST00000054254	-5.28867	0.0447418	DOWN	ENSMUSG00000045319	Q8C5R2	Proser2	Proline and serine-rich protein 2 [Source:UniProtKB/Swiss-Prot;Acc:Q8C5R2]
11983	ENSMUST00000067496	-5.28676	0.0273166	DOWN	ENSMUSG00000054428	O35143	Atpif1	ATPase inhibitor, mitochondrial [Source:UniProtKB/Swiss-Prot;Acc:O35143]
12829	ENSMUST00000087050	-5.2685	0.0290222	DOWN	ENSMUSG00000067158	Q9QZR9	Col4a4	Collagen alpha-4(IV) chain [Source:UniProtKB/Swiss-Prot;Acc:Q9QZR9]
68877	ENSMUST00000160172	-5.26761	0.0284137	DOWN	ENSMUSG00000022553	Q9D0U6	Maf1	Repressor of RNA polymerase III transcription MAF1 homolog [Source:UniProtKB/Swiss-Prot;Acc:Q9D0U6]
53970	ENSMUST00000107253	-5.24884	0.0404132	DOWN	ENSMUSG00000005774	Q0P5W9	Rfx5	Mus musculus regulatory factor X, 5 (influences HLA class II expression) (Rfx5), transcript variant 2, mRNA. [Source:RefSeq mRNA;Acc:NM_001355705]
19708	ENSMUST00000118623	-5.24762	0.0253919	DOWN	ENSMUSG00000024826	Q61103	Dpf2	Zinc finger protein ubi-d4 [Source:UniProtKB/Swiss-Prot;Acc:Q61103]
55981	ENSMUST00000184389	-5.23879	0.0246464	DOWN	ENSMUSG00000079469	Q9JJQ0	Pigb	GPI mannosyltransferase 3 [Source:UniProtKB/Swiss-Prot;Acc:Q9JJQ0]
77613	ENSMUST00000141385	-5.22816	0.000915631	DOWN	ENSMUSG00000070371	E9QJT0	Prss36	serine protease 36 [Source:HGNC Symbol;Acc:HGNC:26906]
67392	ENSMUST00000224081	-5.22193	0.0299256	DOWN	ENSMUSG00000062822	Q3UJC8	4833420G17Rik	RIKEN cDNA 4833420G17 gene
16179	ENSMUST00000148706	-5.22002	0.0456408	DOWN	ENSMUSG00000031392	Q62406	Irak1	Interleukin-1 receptor-associated kinase 1 [Source:UniProtKB/Swiss-Prot;Acc:Q62406]
52432	ENSMUST00000155672	-5.21895	0.0204224	DOWN	ENSMUSG00000041769	Q925E7	Ppp2r2d	protein phosphatase 2, regulatory subunit B, delta [Source:MGI Symbol;Acc:MGI:1289252]
215494	ENSMUST00000217610	-5.20928	0.0412961	DOWN	ENSMUSG00000066235	Q8BW41	Pomgnt2	Protein O-linked-mannose beta-1,4-N-acetylglucosaminyltransferase 2 [Source:UniProtKB/Swiss-Prot;Acc:Q8BW41]
75751	ENSMUST00000047131	-5.18385	0.0228187	DOWN	ENSMUSG00000002319	Q8VI75	Ipo4	Importin-4 [Source:UniProtKB/Swiss-Prot;Acc:Q8VI75]
73274	ENSMUST00000136471	-5.16729	0.0455422	DOWN	ENSMUSG00000032745	Q6NXH3	Gpbp1	GC-rich promoter binding protein 1 [Source:MGI Symbol;Acc:MGI:1920524]
216867	ENSMUST00000149880	-5.1638	0.000344833	DOWN	ENSMUSG00000040938	Q9JJC0	Slc16a11	solute carrier family 16 (monocarboxylic acid transporters), member 11 [Source:MGI Symbol;Acc:MGI:2663709]
21374	ENSMUST00000014911	-5.15897	0.0353839	DOWN	ENSMUSG00000014767	P29037	Tbp	TATA box binding protein [Source:MGI Symbol;Acc:MGI:101838]
228602	ENSMUST00000138758	-5.15204	0.0401993	DOWN	ENSMUSG00000027309	Q7TT23	4930402H24Rik	Uncharacterized [Source:UniProtKB/Swiss-Prot;Acc:Q7TT23]
230603	ENSMUST00000064129	-5.14941	0.0432069	DOWN	ENSMUSG00000028555	A2ACP1	Ttc39a	tetratricopeptide repeat domain 39A [Source:MGI Symbol;Acc:MGI:2444350]
20922	ENSMUST00000093955	-5.14817	0.0451211	DOWN	ENSMUSG00000020485	P63271	Supt4a	suppressor of Ty 4A [Source:MGI Symbol;Acc:MGI:107416]
78670	ENSMUST00000219959	-5.14351	0.0461831	DOWN	ENSMUSG00000035278	Q9D240	Plekhj1	pleckstrin homology domain containing, family J member 1
104718	ENSMUST00000062957	-5.13375	0.000937884	DOWN	ENSMUSG00000033530	E9Q6P5	Ttc7b	tetratricopeptide repeat domain 7B
227835	ENSMUST00000100127	-5.13319	0.0276229	DOWN	ENSMUSG00000036890	Q8BW56	Gtdc1	Glycosyltransferase-like domain-containing protein 1 [Source:UniProtKB/Swiss-Prot;Acc:Q8BW56]
67808	ENSMUST00000134492	-5.12935	0.0407057	DOWN	ENSMUSG00000029030	Q9DBS2	Tprgl	Tumor protein p63-regulated 1-like protein [Source:UniProtKB/Swiss-Prot;Acc:Q9DBS2]
110315	ENSMUST00000193064	-5.12296	6.68905e-05	DOWN	ENSMUSG00000076479	A0A0B4J1P5,A0A075B5J0	Trbv26	T cell receptor beta, variable 26
69837	ENSMUST00000165164	-5.09536	0.0210628	DOWN	ENSMUSG00000069678	A0A0R4J141	Pcgf1	Polycomb group RING finger protein 1 [Source:UniProtKB/Swiss-Prot;Acc:Q8R023]
100503185	ENSMUST00000060553	-5.07508	0.0306728	DOWN	ENSMUSG00000111375	D3YUB6	Btbd8	BTB (POZ) domain containing 8
73545	ENSMUST00000162114	-5.06912	0.0185914	DOWN	ENSMUSG00000027942	A0A0R4J089	4933434E20Rik	RIKEN cDNA 1700094D03 gene
69454	ENSMUST00000142006	-5.06683	1.92071e-06	DOWN	ENSMUSG00000015093	Q9D7P7	Clic3	Chloride intracellular channel protein 3 [Source:UniProtKB/Swiss-Prot;Acc:Q9D7P7]
19383	ENSMUST00000129137	-5.06312	0.0435341	DOWN	ENSMUSG00000027593	Q64012	Raly	hnRNP-associated with lethal yellow [Source:MGI Symbol;Acc:MGI:97850]
67095	ENSMUST00000211301	-5.05817	0.0452636	DOWN	ENSMUSG00000032536	Q6PD31	Trak1	trafficking protein, kinesin binding 1 [Source:MGI Symbol;Acc:MGI:1914345]
239510	ENSMUST00000230948	-5.05063	0.000105761	DOWN	ENSMUSG00000072501	Q8CCJ9	Phf20l1	PHD finger protein 20-like 1
74330	ENSMUST00000026410	-5.0418	0.0171411	DOWN	ENSMUSG00000025354	Q921R4	Dnajc14	DnaJ heat shock protein family (Hsp40) member C14
13107	ENSMUST00000206552	-5.04161	0.0183976	DOWN	ENSMUSG00000052974	P33267	Cyp2f2	Cytochrome P450 2F2 [Source:UniProtKB/Swiss-Prot;Acc:P33267]
74763	ENSMUST00000006138	-5.00782	0.00442768	DOWN	ENSMUSG00000005982	Q9DBU2	Naa60	N-alpha-acetyltransferase 60 [Source:UniProtKB/Swiss-Prot;Acc:Q9DBU2]
18744	ENSMUST00000036354	-5.00582	0.0154252	DOWN	ENSMUSG00000034403	Q05CG5	Pja1	E3 ubiquitin-protein ligase Praja-1 [Source:UniProtKB/Swiss-Prot;Acc:O55176]
18027	ENSMUST00000152023	-5.00573	0.02632	DOWN	ENSMUSG00000028565	Q02780	Nfia	Nuclear factor 1 A-type [Source:UniProtKB/Swiss-Prot;Acc:Q02780]
73873	ENSMUST00000058269	-5.00152	0.0400323	DOWN	ENSMUSG00000049811	B1AVK0	Fam161a	family with sequence similarity 161, member A
74585	ENSMUST00000150708	-4.99979	0.0259611	DOWN	ENSMUSG00000029550	Q9CUS9	Sppl3	Signal peptide peptidase-like 3 [Source:UniProtKB/Swiss-Prot;Acc:Q9CUS9]
244152	ENSMUST00000167405	-4.9982	0.0250852	DOWN	ENSMUSG00000049580	Q08EE6	Tsku	tsukushi, small leucine rich proteoglycan [Source:MGI Symbol;Acc:MGI:2443855]
232288	ENSMUST00000113359	-4.99818	0.00136858	DOWN	ENSMUSG00000030064	Q920B0	Frmd4b	Mus musculus FERM domain containing 4B (Frmd4b), transcript variant 2, mRNA. [Source:RefSeq mRNA;Acc:NM_001346639]
20592	ENSMUST00000189626	-4.98066	0.0235154	DOWN	ENSMUSG00000056673	Q62240	Kdm5d	Lysine-specific demethylase 5D [Source:UniProtKB/Swiss-Prot;Acc:Q62240]
64704	ENSMUST00000150217	-4.97822	0.0407622	DOWN	ENSMUSG00000068329	Q9JIY5	Htra2	Serine protease HTRA2, mitochondrial [Source:UniProtKB/Swiss-Prot;Acc:Q9JIY5]
243725	ENSMUST00000177338	-4.97608	0.0456447	DOWN	ENSMUSG00000032827	Q7TN74	Ppp1r9a	protein phosphatase 1, regulatory (inhibitor) subunit 9A [Source:MGI Symbol;Acc:MGI:2442401]
22290	ENSMUST00000133976	-4.97211	0.0257859	DOWN	ENSMUSG00000068457	G3X9F2	Uty	ubiquitously transcribed tetratricopeptide repeat gene, Y chromosome [Source:MGI Symbol;Acc:MGI:894810]
26908	ENSMUST00000148961	-4.95919	0.0272309	DOWN	ENSMUSG00000069049	Q9Z0N2	Eif2s3y	Eukaryotic translation initiation factor 2 subunit 3, Y-linked [Source:UniProtKB/Swiss-Prot;Acc:Q9Z0N2]
233789	ENSMUST00000179047	-4.95616	0.0194021	DOWN	ENSMUSG00000030655	Q8BKX6	Smg1	Serine/threonine-protein kinase SMG1 [Source:UniProtKB/Swiss-Prot;Acc:Q8BKX6]
18632	ENSMUST00000156015	-4.95464	0.0161994	DOWN	ENSMUSG00000028102	Q9Z210	Pex11b	Peroxisomal membrane protein 11B [Source:UniProtKB/Swiss-Prot;Acc:Q9Z210]
65963	ENSMUST00000203265	-4.95058	0.0251162	DOWN	ENSMUSG00000029810	Q9R1Q6	Tmem176b	Transmembrane protein 176B [Source:UniProtKB/Swiss-Prot;Acc:Q9R1Q6]
72315	ENSMUST00000183279	-4.9485	0.0199558	DOWN	ENSMUSG00000041617	E9Q9U8	Ccdc74a	coiled-coil domain containing 74A [Source:MGI Symbol;Acc:MGI:1919565]
109225	ENSMUST00000067532	-4.94157	0.04287	DOWN	ENSMUSG00000024672	Q8BV59	Ms4a7	membrane-spanning 4-domains, subfamily A, member 7
67500	ENSMUST00000218946	-4.93466	0.0431354	DOWN	ENSMUSG00000020074	Q8CH18	Ccar1	cell division cycle and apoptosis regulator 1
382406	ENSMUST00000020113	-4.92288	0.0289381	DOWN	ENSMUSG00000019952	Q8BHD1	Poc1b	POC1 centriolar protein B [Source:MGI Symbol;Acc:MGI:1918511]
330119	ENSMUST00000163159	-4.91999	0.027523	DOWN	ENSMUSG00000043635	G3X9D2	Adamts3	a disintegrin-like and metallopeptidase (reprolysin type) with thrombospondin type 1 motif, 3 [Source:MGI Symbol;Acc:MGI:3045353]
20930	ENSMUST00000129822	-4.89609	0.0137756	DOWN	ENSMUSG00000015790	P09925	Surf1	Surfeit locus protein 1 [Source:UniProtKB/Swiss-Prot;Acc:P09925]
67923	ENSMUST00000185771	-4.89023	0.0457233	DOWN	ENSMUSG00000079658	P83940	Eloc	Elongin-C [Source:UniProtKB/Swiss-Prot;Acc:P83940]
66058	ENSMUST00000203639	-4.87408	0.0159993	DOWN	ENSMUSG00000023367	Q9DCS1	Tmem176a	Transmembrane protein 176A [Source:UniProtKB/Swiss-Prot;Acc:Q9DCS1]
108655	ENSMUST00000177410	-4.86588	0.0425659	DOWN	ENSMUSG00000030067	P58462	Foxp1	Mus musculus forkhead box P1 (Foxp1), transcript variant 4, mRNA. [Source:RefSeq mRNA;Acc:NM_001347345]
101513	ENSMUST00000210684	-4.86323	0.0422112	DOWN	ENSMUSG00000025147	Q8VI63	Mob2	Mus musculus MOB kinase activator 2 (Mob2), transcript variant 2, mRNA. [Source:RefSeq mRNA;Acc:NM_001347560]
76080	ENSMUST00000109405	-4.84462	0.0485154	DOWN	ENSMUSG00000017679	Q9D3D0	Ttpal	tocopherol (alpha) transfer protein-like [Source:MGI Symbol;Acc:MGI:1923330]
11842	ENSMUST00000156572	-4.83753	0.0411349	DOWN	ENSMUSG00000051853	P61205	Arf3	ADP-ribosylation factor 3 [Source:UniProtKB/Swiss-Prot;Acc:P61205]
63986	ENSMUST00000078845	-4.83705	0.00859378	DOWN	ENSMUSG00000060791	A7VJA4	Gmfg	glia maturation factor, gamma [Source:MGI Symbol;Acc:MGI:1927135]
20592	ENSMUST00000185542	-4.83655	0.032044	DOWN	ENSMUSG00000056673	Q62240	Kdm5d	Lysine-specific demethylase 5D [Source:UniProtKB/Swiss-Prot;Acc:Q62240]
78267	ENSMUST00000192245	-4.83211	0.0210978	DOWN	ENSMUSG00000032609	Q9D2D9	Klhdc8b	Kelch domain-containing protein 8B [Source:UniProtKB/Swiss-Prot;Acc:Q9D2D9]
66989	ENSMUST00000153462	-4.81662	0.0428944	DOWN	ENSMUSG00000005936	Q8CDD8	Kctd20	Mus musculus potassium channel tetramerisation domain containing 20 (Kctd20), transcript variant 3, mRNA. [Source:RefSeq mRNA;Acc:NM_001356299]
382252	ENSMUST00000112464	-4.81012	0.0443546	DOWN	ENSMUSG00000044150	A2AG58	Bclaf3	Bclaf1 and Thrap3 family member 3 [Source:MGI Symbol;Acc:MGI:2685992]
171207	ENSMUST00000114405	-4.80134	0.043388	DOWN	ENSMUSG00000031389	B1AUY2	Arhgap4	Rho GTPase activating protein 4 [Source:MGI Symbol;Acc:MGI:2159577]
103268	ENSMUST00000019951	-4.79761	0.0165019	DOWN	ENSMUSG00000019813	Q8VDS7	Cep57l1	centrosomal protein CEP57L1 isoform 3 [Source:RefSeq peptide;Acc:NP_001230003]
269424	ENSMUST00000191952	-4.78462	0.029552	DOWN	ENSMUSG00000025764	Q6ZPI0	Jade1	Protein Jade-1 [Source:UniProtKB/Swiss-Prot;Acc:Q6ZPI0]
72795	ENSMUST00000162385	-4.76176	0.0418312	DOWN	ENSMUSG00000042298	Q9D857	Ttc19	tetratricopeptide repeat domain 19 [Source:MGI Symbol;Acc:MGI:1920045]
269800	ENSMUST00000112428	-4.75464	0.0259198	DOWN	ENSMUSG00000038346	E9QAR1	Zfp384	zinc finger protein 384 [Source:MGI Symbol;Acc:MGI:2443203]
382030	ENSMUST00000117775	-4.75438	0.0279201	DOWN	ENSMUSG00000036810	Q3UJ81	Cnep1r1	Nuclear envelope phosphatase-regulatory subunit 1 [Source:UniProtKB/Swiss-Prot;Acc:Q3UJ81]
380863	ENSMUST00000148950	-4.74861	0.0166689	DOWN	ENSMUSG00000052485	Q4KL18	Tmem171	Transmembrane protein 171 [Source:UniProtKB/Swiss-Prot;Acc:Q4KL18]
108655	ENSMUST00000124058	-4.74114	0.0370002	DOWN	ENSMUSG00000030067	P58462	Foxp1	Mus musculus forkhead box P1 (Foxp1), transcript variant 4, mRNA. [Source:RefSeq mRNA;Acc:NM_001347345]
80294	ENSMUST00000218064	-4.74107	0.0147285	DOWN	ENSMUSG00000020260	B2RV73	Pofut2	protein O-fucosyltransferase 2
56427	ENSMUST00000108030	-4.73641	0.00889885	DOWN	ENSMUSG00000020513	Q8CDD3	Tubd1	tubulin, delta 1 [Source:MGI Symbol;Acc:MGI:1891826]
231086	ENSMUST00000141236	-4.73222	0.0221864	DOWN	ENSMUSG00000059447	Q99JY0	Hadhb	hydroxyacyl-Coenzyme A dehydrogenase/3-ketoacyl-Coenzyme A thiolase/enoyl-Coenzyme A hydratase (trifunctional protein), beta subunit [Source:MGI Symbol;Acc:MGI:2136381]
218699	ENSMUST00000225653	-4.72206	0.0159296	DOWN	ENSMUSG00000033885	Q8BX57	Pxk	PX domain containing serine/threonine kinase
71678	ENSMUST00000195054	-4.71634	0.0397242	DOWN	ENSMUSG00000046836	Q8K2Q7	Brox	Mus musculus BRO1 domain and CAAX motif containing (Brox), transcript variant 2, mRNA. [Source:RefSeq mRNA;Acc:NM_001357242]
228960	ENSMUST00000156054	-4.69761	0.0390943	DOWN	ENSMUSG00000027522	Q8BVI5	Stx16	syntaxin 16 [Source:MGI Symbol;Acc:MGI:1923396]
66606	ENSMUST00000102497	-4.67803	0.0217038	DOWN	ENSMUSG00000027286	Q8JZX5	Lrrc57	leucine-rich repeat-containing protein 57 isoform a [Source:RefSeq peptide;Acc:NP_001153082]
100041546	ENSMUST00000100542	-4.67347	0.0158104	DOWN	ENSMUSG00000022584	P0CW03	Ly6c2	Mus musculus lymphocyte antigen 6 complex, locus C2 (Ly6c2), transcript variant 1, mRNA. [Source:RefSeq mRNA;Acc:NM_001357693]
11750	ENSMUST00000065504	-4.66158	0.027766	DOWN	ENSMUSG00000021814	Q3UYL7	Anxa7	annexin A7
13732	ENSMUST00000210939	-4.64991	0.00887115	DOWN	ENSMUSG00000040212	O35912	Emp3	Epithelial membrane protein 3 [Source:UniProtKB/Swiss-Prot;Acc:O35912]
22041	ENSMUST00000168142	-4.64665	0.0195068	DOWN	ENSMUSG00000032554	Q921I1	Trf	Serotransferrin [Source:UniProtKB/Swiss-Prot;Acc:Q921I1]
26888	ENSMUST00000032248	-4.64267	0.00314375	DOWN	ENSMUSG00000030148	Q9QZ15	Clec4a2	C-type lectin domain family 4 member A [Source:UniProtKB/Swiss-Prot;Acc:Q9QZ15]
19338	ENSMUST00000195715	-4.64226	0.00651966	DOWN	ENSMUSG00000027739	O35963	Rab33b	RAB33B, member RAS oncogene family [Source:MGI Symbol;Acc:MGI:1330805]
329470	ENSMUST00000111246	-4.63874	0.0482626	DOWN	ENSMUSG00000040272	A2AIG8	Accs	1-aminocyclopropane-1-carboxylate synthase (non-functional) [Source:MGI Symbol;Acc:MGI:1919717]
100034684	ENSMUST00000096089	-4.63267	0.00552263	DOWN	ENSMUSG00000071561	Q497J0	BC100530	cDNA sequence BC100530 [Source:MGI Symbol;Acc:MGI:3696883]
64540	ENSMUST00000146305	-4.62533	0.0385509	DOWN	ENSMUSG00000025511	Q4FJW7	Tspan4	tetraspanin 4 [Source:MGI Symbol;Acc:MGI:1928097]
73942	ENSMUST00000225299	-4.6247	0.0212127	DOWN	ENSMUSG00000034334	D3YUE4	Fam151b	family with sequence similarity 151, member B
20301	ENSMUST00000136768	-4.62385	0.0272638	DOWN	ENSMUSG00000073888	A2AMS7	Ccl27a	chemokine (C-C motif) ligand 27A [Source:MGI Symbol;Acc:MGI:1343459]
235493	ENSMUST00000216809	-4.6198	0.0192262	DOWN	ENSMUSG00000034858	Q69ZK7	Fam214a	Protein FAM214A [Source:UniProtKB/Swiss-Prot;Acc:Q69ZK7]
628900	ENSMUST00000109960	-4.61317	0.00511224	DOWN	ENSMUSG00000079014	D3Z450	Serpina3i	serine (or cysteine) peptidase inhibitor, clade A, member 3I
76453	ENSMUST00000208402	-4.60077	0.0267831	DOWN	ENSMUSG00000039405	Q9D6X6	Prss23	Serine protease 23 [Source:UniProtKB/Swiss-Prot;Acc:Q9D6X6]
70285	ENSMUST00000196909	-4.56263	0.00337469	DOWN	ENSMUSG00000028187	Q7TND5	Rpf1	ribosome production factor 1 homolog [Source:MGI Symbol;Acc:MGI:1917535]
209630	ENSMUST00000147156	-4.54734	0.0413776	DOWN	ENSMUSG00000026657	Q8BIE6	Frmd4a	Mus musculus FERM domain containing 4A (Frmd4a), transcript variant 4, mRNA. [Source:RefSeq mRNA;Acc:NM_001347086]
12406	ENSMUST00000208749	-4.54183	0.0322219	DOWN	ENSMUSG00000070436	P19324	Serpinh1	Serpin H1 [Source:UniProtKB/Swiss-Prot;Acc:P19324]
80901	ENSMUST00000216072	-4.52725	0.0360873	DOWN	ENSMUSG00000048521	Q9EQ16	Cxcr6	C-X-C chemokine receptor type 6 [Source:UniProtKB/Swiss-Prot;Acc:Q9EQ16]
233813	ENSMUST00000165055	-4.52462	0.0194193	DOWN	ENSMUSG00000030889	Q3UVV9	Vwa3a	von Willebrand factor A domain containing 3A [Source:MGI Symbol;Acc:MGI:3041229]
-	ENSMUST00000149819	-4.51236	0.0178673	DOWN	ENSMUSG00000110234	A0A1B0GRJ5,A0A1B0GR28,D3YVK5,D3YVK4	Gm45799	predicted gene 45799 [Source:MGI Symbol;Acc:MGI:5804914]
109778	ENSMUST00000142737	-4.50785	0.042893	DOWN	ENSMUSG00000001999	Q9CY64	Blvra	Biliverdin reductase A [Source:UniProtKB/Swiss-Prot;Acc:Q9CY64]
74149	ENSMUST00000141831	-4.50672	0.0456974	DOWN	ENSMUSG00000071266	Q8K3B4	Zfp946	zinc finger protein 946 [Source:MGI Symbol;Acc:MGI:1921399]
12675	ENSMUST00000026217	-4.49388	0.0159384	DOWN	ENSMUSG00000025199	Q3TPN9	Chuk	conserved helix-loop-helix ubiquitous kinase [Source:HGNC Symbol;Acc:HGNC:1974]
14184	ENSMUST00000202138	-4.49287	0.000132885	DOWN	ENSMUSG00000054252	Q7TSI8	Fgfr3	Mus musculus fibroblast growth factor receptor 3 (Fgfr3), transcript variant 6, mRNA. [Source:RefSeq mRNA;Acc:NM_001359036]
170787	ENSMUST00000138245	-4.46868	0.0436865	DOWN	ENSMUSG00000062906	Q6P3E7	Hdac10	Histone deacetylase 10 [Source:UniProtKB/Swiss-Prot;Acc:Q6P3E7]
21387	ENSMUST00000108045	-4.46588	0.0483341	DOWN	ENSMUSG00000000094	Q8BSY3	Tbx4	T-box 4 [Source:MGI Symbol;Acc:MGI:102556]
18000	ENSMUST00000142401	-4.45966	0.0375533	DOWN	ENSMUSG00000026276	P42208	Sept2	septin 2 [Source:MGI Symbol;Acc:MGI:97298]
74025	ENSMUST00000193439	-4.44784	0.0240811	DOWN	ENSMUSG00000032558	Q7TNH6	Nphp3	Nephrocystin-3 [Source:UniProtKB/Swiss-Prot;Acc:Q7TNH6]
76747	ENSMUST00000028369	-4.44228	0.0372597	DOWN	ENSMUSG00000026989	Q9D757	Dapl1	Death-associated protein-like 1 [Source:UniProtKB/Swiss-Prot;Acc:Q9D757]
18476	ENSMUST00000005583	-4.43539	0.0281917	DOWN	ENSMUSG00000005447	Q3TJC2	Pafah1b3	Platelet-activating factor acetylhydrolase IB subunit gamma [Source:UniProtKB/Swiss-Prot;Acc:Q61205]
225876	ENSMUST00000047898	-4.43393	0.0387039	DOWN	ENSMUSG00000054611	P59997	Kdm2a	lysine demethylase 2A [Source:HGNC Symbol;Acc:HGNC:13606]
94066	ENSMUST00000222030	-4.42846	0.0306048	DOWN	ENSMUSG00000021607	Q99N90	Mrpl36	mitochondrial ribosomal protein L36
16456	ENSMUST00000155913	-4.42562	0.0260586	DOWN	ENSMUSG00000038235	O88792	F11r	Junctional adhesion molecule A [Source:UniProtKB/Swiss-Prot;Acc:O88792]
17258	ENSMUST00000208823	-4.41931	0.0399581	DOWN	ENSMUSG00000030557	Q60929	Mef2a	Mus musculus myocyte enhancer factor 2A (Mef2a), transcript variant 7, mRNA. [Source:RefSeq mRNA;Acc:NM_001357325]
217715	ENSMUST00000136495	-4.41118	0.038617	DOWN	ENSMUSG00000004788	Q99LD9	Eif2b2	Translation initiation factor eIF-2B subunit beta [Source:UniProtKB/Swiss-Prot;Acc:Q99LD9]
18830	ENSMUST00000148912	-4.39203	9.73273e-05	DOWN	ENSMUSG00000017754	Q3UFS5	Pltp	phospholipid transfer protein [Source:MGI Symbol;Acc:MGI:103151]
16169	ENSMUST00000078834	-4.39053	0.0482752	DOWN	ENSMUSG00000023206	Q60819	Il15ra	Interleukin-15 receptor subunit alpha Soluble interleukin-15 receptor subunit alpha [Source:UniProtKB/Swiss-Prot;Acc:Q60819]
74568	ENSMUST00000056157	-4.3798	0.0221762	DOWN	ENSMUSG00000012519	Q9D2Y4	Mlkl	Mixed lineage kinase domain-like protein [Source:UniProtKB/Swiss-Prot;Acc:Q9D2Y4]
15490	ENSMUST00000111353	-4.35898	0.0173928	DOWN	ENSMUSG00000026675	O88736	Hsd17b7	hydroxysteroid (17-beta) dehydrogenase 7 [Source:MGI Symbol;Acc:MGI:1330808]
13823	ENSMUST00000112680	-4.34498	0.00597258	DOWN	ENSMUSG00000024044	Q9WV92	Epb41l3	Band 4.1-like protein 3 Band 4.1-like protein 3, N-terminally processed [Source:UniProtKB/Swiss-Prot;Acc:Q9WV92]
56551	ENSMUST00000005487	-4.34336	0.0453593	DOWN	ENSMUSG00000005354	P97493	Txn2	thioredoxin 2 [Source:MGI Symbol;Acc:MGI:1929468]
99237	ENSMUST00000089027	-4.32938	2.22688e-05	DOWN	ENSMUSG00000068040	Q8BH24	Tm9sf4	Transmembrane 9 superfamily member 4 [Source:UniProtKB/Swiss-Prot;Acc:Q8BH24]
17254	ENSMUST00000206895	-4.32596	0.0450669	DOWN	ENSMUSG00000010095	P10852	Slc3a2	solute carrier family 3 (activators of dibasic and neutral amino acid transport), member 2 [Source:MGI Symbol;Acc:MGI:96955]
12388	ENSMUST00000111678	-4.29545	0.0466357	DOWN	ENSMUSG00000034101	P30999	Ctnnd1	Mus musculus catenin (cadherin associated protein), delta 1 (Ctnnd1), transcript variant 7, mRNA. [Source:RefSeq mRNA;Acc:NM_001355065]
71838	ENSMUST00000228930	-4.29533	0.0315796	DOWN	ENSMUSG00000021902	A2RTI5	Phf7	PHD finger protein 7
59042	ENSMUST00000167850	-4.26917	0.0362133	DOWN	ENSMUSG00000055681	O89079	Cope	Coatomer subunit epsilon [Source:UniProtKB/Swiss-Prot;Acc:O89079]
67621	ENSMUST00000129760	-4.26057	0.0342492	DOWN	ENSMUSG00000028545	Q8C6D4	Bend5	BEN domain-containing protein 5 [Source:UniProtKB/Swiss-Prot;Acc:Q8C6D4]
67683	ENSMUST00000119477	-4.24239	0.0360783	DOWN	ENSMUSG00000031226	Q9D0B6	Pbdc1	Protein PBDC1 [Source:UniProtKB/Swiss-Prot;Acc:Q9D0B6]
433016	ENSMUST00000114858	-4.22698	0.012272	DOWN	ENSMUSG00000079597	B2RV77	Gm5483	predicted gene 5483
26908	ENSMUST00000139083	-4.21001	0.0383047	DOWN	ENSMUSG00000069049	Q9Z0N2	Eif2s3y	Eukaryotic translation initiation factor 2 subunit 3, Y-linked [Source:UniProtKB/Swiss-Prot;Acc:Q9Z0N2]
80286	ENSMUST00000210890	-4.20073	0.0249304	DOWN	ENSMUSG00000039530	Q8BTV1	Tusc3	tumor suppressor candidate 3 [Source:MGI Symbol;Acc:MGI:1933134]
194908	ENSMUST00000125307	-4.19829	0.0362761	DOWN	ENSMUSG00000043648	Q5SWZ9	Pld6	Mitochondrial cardiolipin hydrolase [Source:UniProtKB/Swiss-Prot;Acc:Q5SWZ9]
544717	ENSMUST00000183363	-4.17852	0.0358923	DOWN	ENSMUSG00000063320	Q8BTC1	1190007I07Rik	RIKEN cDNA 1190007I07 gene [Source:MGI Symbol;Acc:MGI:3698433]
18631	ENSMUST00000150606	-4.15637	0.0305501	DOWN	ENSMUSG00000030545	Q9Z211	Pex11a	Peroxisomal membrane protein 11A [Source:UniProtKB/Swiss-Prot;Acc:Q9Z211]
218850	ENSMUST00000225139	-4.14563	0.00424179	DOWN	ENSMUSG00000040651	Q69ZR9	Fam208a	family with sequence similarity 208, member A
67856	ENSMUST00000114941	-4.13679	0.0190124	DOWN	ENSMUSG00000039063	Q9D7J9	Echdc3	Enoyl-CoA hydratase domain-containing protein 3, mitochondrial [Source:UniProtKB/Swiss-Prot;Acc:Q9D7J9]
14999	ENSMUST00000114232	-4.13139	0.0237931	DOWN	ENSMUSG00000079547	Q31094	H2-DMb1	histocompatibility 2, class II, locus Mb1 [Source:MGI Symbol;Acc:MGI:95922]
56176	ENSMUST00000113914	-4.1251	0.0462046	DOWN	ENSMUSG00000022940	Q9JHG1	Pigp	Phosphatidylinositol N-acetylglucosaminyltransferase subunit P [Source:UniProtKB/Swiss-Prot;Acc:Q9JHG1]
71750	ENSMUST00000168079	-4.12466	0.0346245	DOWN	ENSMUSG00000025404	Q80TM6	R3hdm2	R3H domain-containing protein 2 [Source:UniProtKB/Swiss-Prot;Acc:Q80TM6]
18205	ENSMUST00000050484	-4.12299	0.0412174	DOWN	ENSMUSG00000049107	Q3V1A4	Ntf3	Neurotrophin-3 [Source:UniProtKB/Swiss-Prot;Acc:P20181]
94284	ENSMUST00000014263	-4.10933	0.0107265	DOWN	ENSMUSG00000054545	Q64435	Ugt1a6a	UDP glucuronosyltransferase 1 family, polypeptide A6A [Source:MGI Symbol;Acc:MGI:2137698]
18763	ENSMUST00000228550	-4.10765	0.00122224	DOWN	ENSMUSG00000032855	O08852	Pkd1	polycystin 1, transient receptor poteintial channel interacting
13163	ENSMUST00000173279	-4.10585	0.0310474	DOWN	ENSMUSG00000002307	O35613	Daxx	Mus musculus Fas death domain-associated protein (Daxx), transcript variant 3, mRNA. [Source:RefSeq mRNA;Acc:NM_001355704]
18778	ENSMUST00000125568	-4.08957	0.0444791	DOWN	ENSMUSG00000029522	Q9Z0Y2	Pla2g1b	Phospholipase A2 [Source:UniProtKB/Swiss-Prot;Acc:Q9Z0Y2]
19336	ENSMUST00000224685	-4.0814	0.0114933	DOWN	ENSMUSG00000034789	P35290	Rab24	RAB24, member RAS oncogene family
237859	ENSMUST00000134685	-4.06323	0.038691	DOWN	ENSMUSG00000037958	Q5NCR9	Nsrp1	Nuclear speckle splicing regulatory protein 1 [Source:UniProtKB/Swiss-Prot;Acc:Q5NCR9]
77733	ENSMUST00000110575	-4.05337	0.0324688	DOWN	ENSMUSG00000013878	Q8CBG9	Rnf170	Mus musculus ring finger protein 170 (Rnf170), transcript variant 3, mRNA. [Source:RefSeq mRNA;Acc:NM_001357293]
21400	ENSMUST00000136145	-4.04608	0.0164715	DOWN	ENSMUSG00000059540	Q9QVN7	Tcea2	transcription elongation factor A (SII), 2 [Source:MGI Symbol;Acc:MGI:107368]
57875	ENSMUST00000174858	-4.04511	0.00777482	DOWN	ENSMUSG00000002289	Q9Z1P8	Angptl4	Angiopoietin-related protein 4 [Source:UniProtKB/Swiss-Prot;Acc:Q9Z1P8]
21871	ENSMUST00000037865	-4.03943	0.0166529	DOWN	ENSMUSG00000038023	P15920	Atp6v0a2	V-type proton ATPase 116 kDa subunit a isoform 2 [Source:UniProtKB/Swiss-Prot;Acc:P15920]
68653	ENSMUST00000230498	-4.0271	0.0266554	DOWN	ENSMUSG00000022437	Q8BGH2	Samm50	SAMM50 sorting and assembly machinery component
242736	ENSMUST00000132915	-4.0112	0.0373982	DOWN	ENSMUSG00000046862	Q8CE24	Pramef8	PRAME family member 8 [Source:MGI Symbol;Acc:MGI:2140473]
66264	ENSMUST00000150357	-4.00214	0.0277401	DOWN	ENSMUSG00000028795	Q8CEG5	Ccdc28b	Coiled-coil domain-containing protein 28B [Source:UniProtKB/Swiss-Prot;Acc:Q8CEG5]
71711	ENSMUST00000146661	-4.00133	0.0269477	DOWN	ENSMUSG00000024906	Q91ZJ0	Mus81	Crossover junction endonuclease MUS81 [Source:UniProtKB/Swiss-Prot;Acc:Q91ZJ0]
399566	ENSMUST00000002880	-3.99734	0.0151306	DOWN	ENSMUSG00000002803	Q8K2J9	Btbd6	BTB (POZ) domain containing 6
74008	ENSMUST00000106697	-3.99127	0.0139805	DOWN	ENSMUSG00000020604	Q3TYD4	Arsg	Arylsulfatase G [Source:UniProtKB/Swiss-Prot;Acc:Q3TYD4]
353047	ENSMUST00000041272	-3.99016	0.0230127	DOWN	ENSMUSG00000034247	Q7TSI1	Plekhm1	Pleckstrin homology domain-containing family M member 1 [Source:UniProtKB/Swiss-Prot;Acc:Q7TSI1]
217333	ENSMUST00000021120	-3.98805	0.0483731	DOWN	ENSMUSG00000020773	Q497Z1	Trim47	tripartite motif-containing 47 [Source:MGI Symbol;Acc:MGI:1917374]
29811	ENSMUST00000004673	-3.96288	0.0347888	DOWN	ENSMUSG00000004558	Q9QYG0	Ndrg2	N-myc UPstream regulated gene 2
226922	ENSMUST00000115300	-3.94531	0.0174675	DOWN	ENSMUSG00000028033	Q9JK45	Kcnq5	Potassium voltage-gated channel subfamily KQT member 5 [Source:UniProtKB/Swiss-Prot;Acc:Q9JK45]
70225	ENSMUST00000117069	-3.93923	0.0061915	DOWN	ENSMUSG00000026035	Q9D6L8	Ppil3	Peptidyl-prolyl cis-trans isomerase-like 3 [Source:UniProtKB/Swiss-Prot;Acc:Q9D6L8]
79202	ENSMUST00000171066	-3.92249	0.000193843	DOWN	ENSMUSG00000010751	Q9ER62	Tnfrsf22	Tumor necrosis factor receptor superfamily member 22 [Source:UniProtKB/Swiss-Prot;Acc:Q9ER62]
70823	ENSMUST00000211863	-3.92197	0.0178226	DOWN	ENSMUSG00000034518	Q80Y32	Hmgxb4	HMG domain-containing protein 4 isoform 2 [Source:RefSeq peptide;Acc:NP_001303682]
14263	ENSMUST00000133017	-3.91269	0.0168466	DOWN	ENSMUSG00000028088	Q3TRA1	Fmo5	Mus musculus flavin containing monooxygenase 5 (Fmo5), transcript variant 4, mRNA. [Source:RefSeq mRNA;Acc:NM_001355119]
70209	ENSMUST00000209292	-3.90697	0.0309441	DOWN	ENSMUSG00000002781	G3X9F4	Tmem143	transmembrane protein 143 [Source:HGNC Symbol;Acc:HGNC:25603]
110454	ENSMUST00000190188	-3.90361	0.0230605	DOWN	ENSMUSG00000075602	P05533	Ly6a	Lymphocyte antigen 6A-2/6E-1 [Source:UniProtKB/Swiss-Prot;Acc:P05533]
109054	ENSMUST00000170167	-3.89067	0.0416317	DOWN	ENSMUSG00000052033	Q6P0X1	Pfdn4	prefoldin 4 [Source:MGI Symbol;Acc:MGI:1923512]
69731	ENSMUST00000051364	-3.85868	0.0362305	DOWN	ENSMUSG00000044709	Q9CWY4	Gemin7	Gem-associated protein 7 [Source:UniProtKB/Swiss-Prot;Acc:Q9CWY4]
27060	ENSMUST00000001801	-3.85463	0.0382409	DOWN	ENSMUSG00000001750	Q9JHF5	Tcirg1	T cell, immune regulator 1, ATPase, H+ transporting, lysosomal V0 protein A3 [Source:MGI Symbol;Acc:MGI:1350931]
237940	ENSMUST00000041095	-3.85274	0.0446018	DOWN	ENSMUSG00000078651	Q812C9	Aoc2	Retina-specific copper amine oxidase [Source:UniProtKB/Swiss-Prot;Acc:Q812C9]
74772	ENSMUST00000127833	-3.84909	0.0288963	DOWN	ENSMUSG00000036622	Q9CTG6	Atp13a2	Cation-transporting ATPase 13A2 [Source:UniProtKB/Swiss-Prot;Acc:Q9CTG6]
214899	ENSMUST00000203373	-3.84346	0.0204432	DOWN	ENSMUSG00000030180	Q3UXZ9	Kdm5a	Lysine-specific demethylase 5A [Source:UniProtKB/Swiss-Prot;Acc:Q3UXZ9]
226255	ENSMUST00000077282	-3.84273	0.00304424	DOWN	ENSMUSG00000054843	Q6A051	Atrnl1	attractin like 1
100041621,100041574	ENSMUST00000226213	-3.83556	0.0343171	DOWN	ENSMUSG00000036552	F6UWZ4,Q8C5D3	Ermard	predicted gene 3435
244152	ENSMUST00000179780	-3.83238	0.0337183	DOWN	ENSMUSG00000049580	Q08EE6	Tsku	tsukushi, small leucine rich proteoglycan [Source:MGI Symbol;Acc:MGI:2443855]
69126	ENSMUST00000190064	-3.81203	0.012246	DOWN	ENSMUSG00000078784	G3UW58	1810022K09Rik	Mus musculus RIKEN cDNA 1810022K09 (1810022K09Rik), transcript variant 1, mRNA. [Source:RefSeq mRNA;Acc:NM_001347206]
57080	ENSMUST00000201495	-3.79402	0.0256467	DOWN	ENSMUSG00000023079	Q9JI57	Gtf2ird1	ral transcription factor II-I repeat domain-containing protein 1 [Source:UniProtKB/Swiss-Prot;Acc:Q9JI57]
20014	ENSMUST00000156007	-3.79002	0.0314666	DOWN	ENSMUSG00000027642	Q9DBG6	Rpn2	Mus musculus ribophorin II (Rpn2), transcript variant 4, mRNA. [Source:RefSeq mRNA;Acc:NM_001355165]
22644	ENSMUST00000114178	-3.77003	0.0206816	DOWN	ENSMUSG00000052656	Q9R1W3	Rnf103	E3 ubiquitin-protein ligase RNF103 [Source:UniProtKB/Swiss-Prot;Acc:Q9R1W3]
20855	ENSMUST00000014957	-3.73191	0.0390031	DOWN	ENSMUSG00000014813	Q3UYZ1	Stc1	stanniocalcin 1
65111	ENSMUST00000172790	-3.72641	0.0160127	DOWN	ENSMUSG00000068921	G3X9M0	Dap3	28S ribosomal protein S29, mitochondrial [Source:UniProtKB/Swiss-Prot;Acc:Q9ER88]
20363	ENSMUST00000160930	-3.7166	0.0324448	DOWN	ENSMUSG00000064373	P70274	Selenop	Selenoprotein P [Source:UniProtKB/Swiss-Prot;Acc:P70274]
243725	ENSMUST00000035813	-3.67927	0.0134107	DOWN	ENSMUSG00000032827	Q7TN74	Ppp1r9a	protein phosphatase 1, regulatory (inhibitor) subunit 9A [Source:MGI Symbol;Acc:MGI:2442401]
94219	ENSMUST00000099373	-3.67619	0.0164333	DOWN	ENSMUSG00000064105	Q3TWN3	Cnnm2	cyclin M2
276852	ENSMUST00000042227	-3.67476	0.00736565	DOWN	ENSMUSG00000041623	Q6PIX9	D11Wsu47e	Uncharacterized [Source:UniProtKB/Swiss-Prot;Acc:Q6PIX9]
73472	ENSMUST00000178631	-3.66036	0.0297615	DOWN	ENSMUSG00000029155	Q0P557	Spata18	spermatogenesis associated 18 [Source:MGI Symbol;Acc:MGI:1920722]
19383	ENSMUST00000029120	-3.65469	0.0424081	DOWN	ENSMUSG00000027593	Q64012	Raly	hnRNP-associated with lethal yellow [Source:MGI Symbol;Acc:MGI:97850]
19732	ENSMUST00000173258	-3.63497	0.044333	DOWN	ENSMUSG00000041354	Q61193	Rgl2	Ral guanine nucleotide dissociation stimulator-like 2 [Source:UniProtKB/Swiss-Prot;Acc:Q61193]
170791	ENSMUST00000137297	-3.63114	0.0325931	DOWN	ENSMUSG00000027620	Q8VH51	Rbm39	RNA binding motif protein 39 [Source:MGI Symbol;Acc:MGI:2157953]
21341	ENSMUST00000212929	-3.61541	0.0414945	DOWN	ENSMUSG00000031832	Q6PDZ2	Taf1c	TATA box-binding protein-associated factor RNA polymerase I subunit C [Source:UniProtKB/Swiss-Prot;Acc:Q6PDZ2]
16500	ENSMUST00000148226	-3.605	0.0176572	DOWN	ENSMUSG00000050556	Q03717	Kcnb1	Potassium voltage-gated channel subfamily B member 1 [Source:UniProtKB/Swiss-Prot;Acc:Q03717]
209361	ENSMUST00000114909	-3.60098	0.00641425	DOWN	ENSMUSG00000025782	A2ASY1	Taf3	TATA-box binding protein associated factor 3 [Source:MGI Symbol;Acc:MGI:2388097]
13897	ENSMUST00000175983	-3.60042	0.0474427	DOWN	ENSMUSG00000061959	Q3UN14	Ces1e	Carboxylesterase 1E [Source:UniProtKB/Swiss-Prot;Acc:Q64176]
77733	ENSMUST00000110573	-3.59678	0.0315277	DOWN	ENSMUSG00000013878	Q8CBG9	Rnf170	Mus musculus ring finger protein 170 (Rnf170), transcript variant 3, mRNA. [Source:RefSeq mRNA;Acc:NM_001357293]
381801	ENSMUST00000153661	-3.588	0.0274446	DOWN	ENSMUSG00000056952	F8VQE6	Tatdn2	putative deoxyribonuclease TATDN2 isoform 1 [Source:RefSeq peptide;Acc:NP_001334285]
15932	ENSMUST00000159464	-3.5719	0.0486369	DOWN	ENSMUSG00000033540	Q3U1Z0	Idua	iduronidase, alpha-L- [Source:MGI Symbol;Acc:MGI:96418]
233900	ENSMUST00000206724	-3.56564	0.00486959	DOWN	ENSMUSG00000030816	Q3U319	Rnf40	ring finger protein 40 [Source:MGI Symbol;Acc:MGI:2142048]
14268	ENSMUST00000188894	-3.56008	0.000551576	DOWN	ENSMUSG00000026193	P11276	Fn1	Fibronectin Anastellin [Source:UniProtKB/Swiss-Prot;Acc:P11276]
14790	ENSMUST00000140423	-3.52378	0.0299108	DOWN	ENSMUSG00000072772	O35127	Grcc10	gene rich cluster, C10 gene [Source:MGI Symbol;Acc:MGI:1315201]
14048	ENSMUST00000188857	-3.51654	0.036393	DOWN	ENSMUSG00000025932	P97767	Eya1	Eyes absent homolog 1 [Source:UniProtKB/Swiss-Prot;Acc:P97767]
19383	ENSMUST00000140713	-3.50717	0.026846	DOWN	ENSMUSG00000027593	Q64012	Raly	hnRNP-associated with lethal yellow [Source:MGI Symbol;Acc:MGI:97850]
100504362	ENSMUST00000178919	-3.48943	0.0359656	DOWN	ENSMUSG00000095320	P84444	Ccl21a	predicted gene 1987
66384	ENSMUST00000131713	-3.48023	0.048247	DOWN	ENSMUSG00000014504	Q9D104	Srp19	signal recognition particle 19 [Source:HGNC Symbol;Acc:HGNC:11300]
245536	ENSMUST00000101358	-3.4758	0.035777	DOWN	ENSMUSG00000090141	Q3V2K1	Gm614	predicted gene 614 [Source:MGI Symbol;Acc:MGI:2685460]
19383	ENSMUST00000109701	-3.46006	0.0282021	DOWN	ENSMUSG00000027593	Q64012	Raly	hnRNP-associated with lethal yellow [Source:MGI Symbol;Acc:MGI:97850]
66748	ENSMUST00000153121	-3.44112	0.0490003	DOWN	ENSMUSG00000075302	E9Q1A6	Erich2	glutamate rich 2
83946	ENSMUST00000190838	-3.42796	0.0404512	DOWN	ENSMUSG00000032253	F8VQ93	Phip	pleckstrin homology domain interacting protein [Source:HGNC Symbol;Acc:HGNC:15673]
12304	ENSMUST00000204029	-3.41683	0.0287824	DOWN	ENSMUSG00000025823	P08003	Pdia4	protein disulfide isomerase family A member 4 [Source:HGNC Symbol;Acc:HGNC:30167]
74772	ENSMUST00000151517	-3.4162	0.0320919	DOWN	ENSMUSG00000036622	Q9CTG6	Atp13a2	Cation-transporting ATPase 13A2 [Source:UniProtKB/Swiss-Prot;Acc:Q9CTG6]
78906	ENSMUST00000218531	-3.41333	0.0317717	DOWN	ENSMUSG00000035852	Q9D279	Misp	mitotic spindle positioning
14760	ENSMUST00000116515	-3.35266	0.0288494	DOWN	ENSMUSG00000032641	Q61121	Gpr19	Probable G-protein coupled receptor 19 [Source:UniProtKB/Swiss-Prot;Acc:Q61121]
59008	ENSMUST00000200058	-3.3486	0.0299618	DOWN	ENSMUSG00000029472	Q8BTZ4	Anapc5	Anaphase-promoting complex subunit 5 [Source:UniProtKB/Swiss-Prot;Acc:Q8BTZ4]
328424	ENSMUST00000225582	-3.32716	0.0401265	DOWN	ENSMUSG00000046168	Q2TUM3	Kcnrg	potassium channel regulator
66311	ENSMUST00000099985	-3.29363	0.043475	DOWN	ENSMUSG00000075266	Q3URR0	Cenpw	Centromere protein W [Source:UniProtKB/Swiss-Prot;Acc:Q3URR0]
209837	ENSMUST00000127103	-3.29054	0.0411945	DOWN	ENSMUSG00000031170	Q3U1J0	Slc38a5	Sodium-coupled neutral amino acid transporter 5 [Source:UniProtKB/Swiss-Prot;Acc:Q3U1J0]
15586	ENSMUST00000112387	-3.28435	0.00112363	DOWN	ENSMUSG00000010051	Q91ZJ9	Hyal1	Mus musculus hyaluronoglucosaminidase 1 (Hyal1), transcript variant 2, mRNA. [Source:RefSeq mRNA;Acc:NM_001331161]
16423	ENSMUST00000231187	-3.28219	0.00116522	DOWN	ENSMUSG00000055447	Q61735	Cd47	Leukocyte surface antigen CD47 [Source:UniProtKB/Swiss-Prot;Acc:Q61735]
72747	ENSMUST00000143388	-3.25166	0.0194099	DOWN	ENSMUSG00000024424	Q8BJQ0	Ttc39c	tetratricopeptide repeat domain 39C [Source:MGI Symbol;Acc:MGI:1919997]
56195	ENSMUST00000198733	-3.25115	0.0319123	DOWN	ENSMUSG00000028134	Q91Z31	Ptbp2	Polypyrimidine tract-binding protein 2 [Source:UniProtKB/Swiss-Prot;Acc:Q91Z31]
224902	ENSMUST00000155983	-3.24814	0.0370489	DOWN	ENSMUSG00000042625	Q80YR5	Safb2	scaffold attachment factor B2 [Source:MGI Symbol;Acc:MGI:2146808]
13107	ENSMUST00000133841	-3.2349	0.0110338	DOWN	ENSMUSG00000052974	P33267	Cyp2f2	Cytochrome P450 2F2 [Source:UniProtKB/Swiss-Prot;Acc:P33267]
73724	ENSMUST00000206882	-3.22727	0.0447098	DOWN	ENSMUSG00000033429	Q9D1I5	Mcee	Methylmalonyl-CoA epimerase, mitochondrial [Source:UniProtKB/Swiss-Prot;Acc:Q9D1I5]
14088	ENSMUST00000161507	-3.22079	0.0309659	DOWN	ENSMUSG00000021461	Q8CBR3	Fancc	Mus musculus Fanconi anemia, complementation group C (Fancc), transcript variant 4, mRNA. [Source:RefSeq mRNA;Acc:NM_001347514]
16956	ENSMUST00000168401	-3.21679	0.0100447	DOWN	ENSMUSG00000015568	P11152	Lpl	lipoprotein lipase [Source:MGI Symbol;Acc:MGI:96820]
56703	ENSMUST00000155429	-3.19371	0.0262458	DOWN	ENSMUSG00000028454	Q562G0	Pigo	phosphatidylinositol glycan anchor biosynthesis, class O [Source:MGI Symbol;Acc:MGI:1861452]
22668	ENSMUST00000131083	-3.17636	0.0399003	DOWN	ENSMUSG00000024949	Q3UI45	Sf1	Splicing factor 1 [Source:UniProtKB/Swiss-Prot;Acc:Q64213]
382118	ENSMUST00000215872	-3.1721	0.0230993	DOWN	ENSMUSG00000063488	E9PVW1	Zkscan7	zinc finger with KRAB and SCAN domains 7 [Source:MGI Symbol;Acc:MGI:3040678]
27418	ENSMUST00000026699	-3.16294	0.0114302	DOWN	ENSMUSG00000025609	O89050	Mkln1	Muskelin [Source:UniProtKB/Swiss-Prot;Acc:O89050]
23945	ENSMUST00000163271	-3.15492	0.0237634	DOWN	ENSMUSG00000033174	O35678	Mgll	Monoglyceride lipase [Source:UniProtKB/Swiss-Prot;Acc:O35678]
66435	ENSMUST00000173470	-3.15214	0.0499853	DOWN	ENSMUSG00000042104	E9Q4X2	Uggt2	UDP-glucose glycoprotein glucosyltransferase 2 [Source:MGI Symbol;Acc:MGI:1913685]
76901	ENSMUST00000109091	-3.13447	0.031325	DOWN	ENSMUSG00000020387	Q6ZQF7	Jade2	Mus musculus jade family PHD finger 2 (Jade2), transcript variant 1, mRNA. [Source:RefSeq mRNA;Acc:NM_001357588]
192786	ENSMUST00000136494	-3.11917	0.000439546	DOWN	ENSMUSG00000037533	Q3TKC6	Rapgef6	Rap guanine nucleotide exchange factor (GEF) 6 [Source:MGI Symbol;Acc:MGI:2384761]
244349	ENSMUST00000110696	-3.117	5.08676e-05	DOWN	ENSMUSG00000031540	G3X940	Kat6a	lysine acetyltransferase 6A [Source:HGNC Symbol;Acc:HGNC:13013]
23808	ENSMUST00000166078	-3.11542	0.040295	DOWN	ENSMUSG00000031575	Q91X20	Ash2l	Mus musculus ASH2 like histone lysine methyltransferase complex subunit (Ash2l), transcript variant 4, mRNA. [Source:RefSeq mRNA;Acc:NM_001359012]
216963	ENSMUST00000037285	-3.09886	0.027456	DOWN	ENSMUSG00000011877	Q68FF6	Git1	ARF GTPase-activating protein GIT1 [Source:UniProtKB/Swiss-Prot;Acc:Q68FF6]
72895	ENSMUST00000125003	-3.09611	0.049077	DOWN	ENSMUSG00000034269	Q5XJV7	Setd5	Mus musculus SET domain containing 5 (Setd5), transcript variant 2, mRNA. [Source:RefSeq mRNA;Acc:NM_173005]
329165	ENSMUST00000191493	-3.09063	0.000398964	DOWN	ENSMUSG00000026782	P62484	Abi2	abl-interactor 2 [Source:MGI Symbol;Acc:MGI:106913]
71091	ENSMUST00000021377	-3.08255	0.025484	DOWN	ENSMUSG00000020990	Q14BG3	Cdkl1	cyclin-dependent kinase-like 1 (CDC2-related kinase)
70351	ENSMUST00000162272	-3.08082	0.0329375	DOWN	ENSMUSG00000061950	Q8K2V1	Ppp4r1	protein phosphatase 4 regulatory subunit 1 [Source:HGNC Symbol;Acc:HGNC:9320]
75578	ENSMUST00000141248	-3.07886	0.00111929	DOWN	ENSMUSG00000028573	A2AJL3	Fggy	FGGY carbohydrate kinase domain-containing protein [Source:UniProtKB/Swiss-Prot;Acc:A2AJL3]
105000	ENSMUST00000156138	-3.03293	0.0347166	DOWN	ENSMUSG00000042523	Q05A62	Dnal1	Mus musculus dynein, axonemal, light chain 1 (Dnal1), transcript variant 2, mRNA. [Source:RefSeq mRNA;Acc:NM_001346528]
11865	ENSMUST00000210238	-3.02733	0.0485926	DOWN	ENSMUSG00000055116	Q9WTL8	Arntl	Mus musculus aryl hydrocarbon receptor nuclear translocator-like (Arntl), transcript variant 3, mRNA. [Source:RefSeq mRNA;Acc:NM_001357070]
56758	ENSMUST00000194069	-3.0251	0.0441723	DOWN	ENSMUSG00000027763	Q3U581	Mbnl1	Muscleblind-like protein 1 [Source:UniProtKB/Swiss-Prot;Acc:Q9JKP5]
228769	ENSMUST00000151656	-3.01539	0.0470736	DOWN	ENSMUSG00000032869	A2AU35	Psmf1	proteasome (prosome, macropain) inhibitor subunit 1 [Source:MGI Symbol;Acc:MGI:1346072]
76267	ENSMUST00000010807	-3.00647	0.0299261	DOWN	ENSMUSG00000010663	Q920L1	Fads1	fatty acid desaturase 1
19352	ENSMUST00000200209	-2.99602	0.0226479	DOWN	ENSMUSG00000038975	P53612	Rabggtb	Rab geranylgeranyl transferase, b subunit [Source:MGI Symbol;Acc:MGI:99537]
69019	ENSMUST00000226782	-2.99593	0.000168936	DOWN	ENSMUSG00000021917	Q9D958	Spcs1	Signal peptidase complex subunit 1 [Source:UniProtKB/Swiss-Prot;Acc:Q9D958]
18117	ENSMUST00000034277	-2.99189	0.0185891	DOWN	ENSMUSG00000031819	O70378	Emc8	ER membrane protein complex subunit 8 [Source:UniProtKB/Swiss-Prot;Acc:O70378]
263803	ENSMUST00000156197	-2.97924	0.0338878	DOWN	ENSMUSG00000026785	Q8K045	Pkn3	Serine/threonine-protein kinase N3 [Source:UniProtKB/Swiss-Prot;Acc:Q8K045]
71640	ENSMUST00000161232	-2.97412	0.0204921	DOWN	ENSMUSG00000032425	B2RU83	Zfp949	zinc finger protein 949 [Source:MGI Symbol;Acc:MGI:1918890]
18010	ENSMUST00000174715	-2.96131	0.0100051	DOWN	ENSMUSG00000007038	Q3UL64	Neu1	neuraminidase 1 [Source:MGI Symbol;Acc:MGI:97305]
230393	ENSMUST00000159342	-2.95197	0.0239653	DOWN	ENSMUSG00000038368	A2AKG8	Focad	Focadhesin [Source:UniProtKB/Swiss-Prot;Acc:A2AKG8]
69754	ENSMUST00000147168	-2.95195	0.0385807	DOWN	ENSMUSG00000001786	Q3U7U3	Fbxo7	Mus musculus F-box protein 7 (Fbxo7), transcript variant 3, mRNA. [Source:RefSeq mRNA;Acc:NM_001347151]
192236	ENSMUST00000162004	-2.94392	0.0334161	DOWN	ENSMUSG00000025188	O08983	Hps1	Mus musculus HPS1, biosis of lysosomal organelles complex 3 subunit 1 (Hps1), transcript variant 2, mRNA. [Source:RefSeq mRNA;Acc:NM_001346703]
11983	ENSMUST00000152993	-2.94209	0.00042622	DOWN	ENSMUSG00000054428	O35143	Atpif1	ATPase inhibitor, mitochondrial [Source:UniProtKB/Swiss-Prot;Acc:O35143]
100689	ENSMUST00000201475	-2.91346	0.0235173	DOWN	ENSMUSG00000037379	Q8BMS2	Spon2	Spondin-2 [Source:UniProtKB/Swiss-Prot;Acc:Q8BMS2]
140481	ENSMUST00000205436	-2.91279	0.0251818	DOWN	ENSMUSG00000038886	Q197W7	Man2a2	Alpha-mannosidase 2x [Source:UniProtKB/Swiss-Prot;Acc:Q8BRK9]
16456	ENSMUST00000043839	-2.90407	0.0221953	DOWN	ENSMUSG00000038235	O88792	F11r	Junctional adhesion molecule A [Source:UniProtKB/Swiss-Prot;Acc:O88792]
102566	ENSMUST00000216081	-2.89836	9.94251e-05	DOWN	ENSMUSG00000037949	Q8BH79	Ano10	Anoctamin-10 [Source:UniProtKB/Swiss-Prot;Acc:Q8BH79]
20969	ENSMUST00000160348	-2.88945	0.0465581	DOWN	ENSMUSG00000020592	Q3V1F2	Sdc1	syndecan 1 [Source:MGI Symbol;Acc:MGI:1349162]
54197	ENSMUST00000174475	-2.88318	0.0441965	DOWN	ENSMUSG00000015478	O35445	Rnf5	E3 ubiquitin-protein ligase RNF5 [Source:UniProtKB/Swiss-Prot;Acc:O35445]
213393	ENSMUST00000204555	-2.87733	0.0197336	DOWN	ENSMUSG00000048489	Q8K2F3	8430408G22Rik	Protein DEPP1 [Source:UniProtKB/Swiss-Prot;Acc:Q8K2F3]
18186	ENSMUST00000212833	-2.86709	0.0475606	DOWN	ENSMUSG00000025810	P97333	Nrp1	Neuropilin-1 [Source:UniProtKB/Swiss-Prot;Acc:P97333]
225341	ENSMUST00000025254	-2.86653	0.00107325	DOWN	ENSMUSG00000024395	Q91XD2	Lims2	LIM and senescent cell antigen like domains 2
394432	ENSMUST00000113135	-2.84973	0.000407455	DOWN	ENSMUSG00000090124	Q6ZQM8	Ugt1a7c	UDP glucuronosyltransferase 1 family, polypeptide A7C [Source:MGI Symbol;Acc:MGI:3032636]
105559	ENSMUST00000088419	-2.84625	0.0490882	DOWN	ENSMUSG00000022139	Q8C181	Mbnl2	muscleblind like splicing factor 2
170770	ENSMUST00000147267	-2.8433	0.0443493	DOWN	ENSMUSG00000002083	B2RVL4	Bbc3	Bcl-2-binding component 3 [Source:UniProtKB/Swiss-Prot;Acc:Q99ML1]
54409	ENSMUST00000107282	-2.84271	0.0415249	DOWN	ENSMUSG00000001240	Q9WUP0	Ramp2	Receptor activity-modifying protein 2 [Source:UniProtKB/Swiss-Prot;Acc:Q9WUP0]
54426	ENSMUST00000030985	-2.82016	0.00820694	DOWN	ENSMUSG00000029102	Q9R098	Hgfac	hepatocyte growth factor activator [Source:MGI Symbol;Acc:MGI:1859281]
69562	ENSMUST00000042365	-2.81916	0.0257609	DOWN	ENSMUSG00000041297	Q69ZA1	Cdk13	cyclin-dependent kinase 13
16653	ENSMUST00000149314	-2.81633	0.0224619	DOWN	ENSMUSG00000030265	P32883	Kras	GTPase KRas GTPase KRas, N-terminally processed [Source:UniProtKB/Swiss-Prot;Acc:P32883]
11821	ENSMUST00000213029	-2.74862	0.0210223	DOWN	ENSMUSG00000006589	P08030	Aprt	Adenine phosphoribosyltransferase [Source:UniProtKB/Swiss-Prot;Acc:P08030]
22589	ENSMUST00000146193	-2.73844	0.0273418	DOWN	ENSMUSG00000031229	Q61687	Atrx	Transcriptional regulator ATRX [Source:UniProtKB/Swiss-Prot;Acc:Q61687]
68052	ENSMUST00000205265	-2.72308	0.0157158	DOWN	ENSMUSG00000090862	P62301	Rps13	ribosomal protein S13 [Source:MGI Symbol;Acc:MGI:1915302]
11774	ENSMUST00000022196	-2.70487	0.000112324	DOWN	ENSMUSG00000021686	Q3UPG0	Ap3b1	adaptor-related protein complex 3, beta 1 subunit
225280	ENSMUST00000055012	-2.70281	0.0312811	DOWN	ENSMUSG00000047989	Q8BHA0	Ino80c	INO80 complex subunit C [Source:UniProtKB/Swiss-Prot;Acc:Q8BHA0]
20715	ENSMUST00000170628	-2.70229	0.0428632	DOWN	ENSMUSG00000041481	Q5I2A0	Serpina3g	serine (or cysteine) peptidase inhibitor, clade A, member 3G [Source:MGI Symbol;Acc:MGI:105046]
58234	ENSMUST00000135214	-2.70188	0.0147085	DOWN	ENSMUSG00000022623	Q4ACU6	Shank3	SH3 and multiple ankyrin repeat domains protein 3 [Source:UniProtKB/Swiss-Prot;Acc:Q4ACU6]
-	ENSMUST00000176935	-2.69021	0.0211332	DOWN	ENSMUSG00000022362	H3BJT1,H3BKS2,H3BIW7,H3BKI4	Gm29394	-
20638	ENSMUST00000103199	-2.68936	0.00175266	DOWN	ENSMUSG00000027404	P27048	Snrpb	Small nuclear ribonucleoprotein-associated protein B [Source:UniProtKB/Swiss-Prot;Acc:P27048]
68098	ENSMUST00000031345	-2.68302	0.0491269	DOWN	ENSMUSG00000029397	Q9CR50	Rchy1	ring finger and CHY zinc finger domain containing 1 [Source:MGI Symbol;Acc:MGI:1915348]
69178	ENSMUST00000028909	-2.6774	0.0141305	DOWN	ENSMUSG00000027423	Q9D8U8	Snx5	Sorting nexin-5 [Source:UniProtKB/Swiss-Prot;Acc:Q9D8U8]
71770	ENSMUST00000176430	-2.67327	0.0342112	DOWN	ENSMUSG00000035152	Q9DBG3	Ap2b1	AP-2 complex subunit beta [Source:UniProtKB/Swiss-Prot;Acc:Q9DBG3]
217882	ENSMUST00000221125	-2.6639	0.0126835	DOWN	ENSMUSG00000072825	Q80U49	Cep170b	centrosomal protein 170B
319504	ENSMUST00000220130	-2.65255	0.00309826	DOWN	ENSMUSG00000020598	Q810U4	Nrcam	neuronal cell adhesion molecule
114249	ENSMUST00000117164	-2.65244	0.00342439	DOWN	ENSMUSG00000040998	Q91V88	Npnt	Nephronectin [Source:UniProtKB/Swiss-Prot;Acc:Q91V88]
20111	ENSMUST00000168974	-2.63448	0.000455787	DOWN	ENSMUSG00000003644	P18653	Rps6ka1	ribosomal protein S6 kinase polypeptide 1 [Source:MGI Symbol;Acc:MGI:104558]
140497	ENSMUST00000092464	-2.63413	0.0433619	DOWN	ENSMUSG00000044811	Q7TSN2	Cd300c2	CD300C molecule 2 [Source:MGI Symbol;Acc:MGI:2153249]
319477	ENSMUST00000217624	-2.63372	0.00120533	DOWN	ENSMUSG00000066607	Q8CD60	6030419C18Rik	UPF0583 [Source:UniProtKB/Swiss-Prot;Acc:Q8CD60]
68519	ENSMUST00000155544	-2.62565	0.0329367	DOWN	ENSMUSG00000058070	Q05BC3	Eml1	Echinoderm microtubule-associated protein-like 1 [Source:UniProtKB/Swiss-Prot;Acc:Q05BC3]
67855	ENSMUST00000043400	-2.6207	0.00047964	DOWN	ENSMUSG00000033508	Q09PK2	Asprv1	Retroviral-like aspartic protease 1 [Source:UniProtKB/Swiss-Prot;Acc:Q09PK2]
330260	ENSMUST00000057792	-2.61888	0.0133312	DOWN	ENSMUSG00000032667	Q62086	Pon2	Serum paraoxonase/arylesterase 2 [Source:UniProtKB/Swiss-Prot;Acc:Q62086]
13666	ENSMUST00000159401	-2.6169	0.047836	DOWN	ENSMUSG00000031668	A0A0R4J1Y1	Eif2ak3	eukaryotic translation initiation factor 2 alpha kinase 3 [Source:HGNC Symbol;Acc:HGNC:3255]
319880	ENSMUST00000117929	-2.6166	0.017679	DOWN	ENSMUSG00000020023	Q8R310	Tmcc3	Transmembrane and coiled-coil domain protein 3 [Source:UniProtKB/Swiss-Prot;Acc:Q8R310]
320799	ENSMUST00000109460	-2.59857	0.000813902	DOWN	ENSMUSG00000035877	Q8C0Q2	Zhx3	zinc fingers and homeoboxes 3 [Source:MGI Symbol;Acc:MGI:2444772]
12153	ENSMUST00000226246	-2.5936	0.0316111	DOWN	ENSMUSG00000022098	P98063	Bmp1	bone morphogenetic protein 1
16785	ENSMUST00000035105	-2.58132	0.0231946	DOWN	ENSMUSG00000032518	P14206	Rpsa	40S ribosomal protein SA [Source:UniProtKB/Swiss-Prot;Acc:P14206]
216049	ENSMUST00000138543	-2.57515	0.0145271	DOWN	ENSMUSG00000037855	Q8BG89	Zfp365	zinc finger protein 365 [Source:MGI Symbol;Acc:MGI:2143676]
27058	ENSMUST00000193005	-2.57334	0.0300821	DOWN	ENSMUSG00000026511	P49962	Srp9	signal recognition particle 9 [Source:MGI Symbol;Acc:MGI:1350930]
30806	ENSMUST00000163037	-2.55862	9.4819e-05	DOWN	ENSMUSG00000031994	F8VQ15	Adamts8	A disintegrin and metalloproteinase with thrombospondin motifs 8 isoform 2 [Source:RefSeq peptide;Acc:NP_001313221]
80876	ENSMUST00000081649	-2.55446	0.0230262	DOWN	ENSMUSG00000060591	Q99J93	Ifitm2	Interferon-induced transmembrane protein 2 [Source:UniProtKB/Swiss-Prot;Acc:Q99J93]
192285	ENSMUST00000159727	-2.54258	0.0298791	DOWN	ENSMUSG00000058318	Q6ZPK0	Phf21a	PHD finger protein 21A isoform 4 [Source:RefSeq peptide;Acc:NP_001333633]
18986	ENSMUST00000176004	-2.52862	0.0191129	DOWN	ENSMUSG00000026565	P25425	Pou2f1	POU domain, class 2, transcription factor 1 [Source:UniProtKB/Swiss-Prot;Acc:P25425]
13728	ENSMUST00000171044	-2.52759	0.0148321	DOWN	ENSMUSG00000024969	E9QMP6	Mark2	microtubule affinity regulating kinase 2 [Source:HGNC Symbol;Acc:HGNC:3332]
244853	ENSMUST00000093853	-2.52617	0.00750692	DOWN	ENSMUSG00000044229	Q52KP5	Nxpe4	NXPE family member 4 [Source:UniProtKB/Swiss-Prot;Acc:Q52KP5]
58234	ENSMUST00000066545	-2.52456	0.0113423	DOWN	ENSMUSG00000022623	Q4ACU6	Shank3	SH3 and multiple ankyrin repeat domains protein 3 [Source:UniProtKB/Swiss-Prot;Acc:Q4ACU6]
27399	ENSMUST00000035214	-2.50992	0.0382252	DOWN	ENSMUSG00000032594	Q6PD10	Ip6k1	Inositol hexakisphosphate kinase 1 [Source:UniProtKB/Swiss-Prot;Acc:Q6PD10]
242646	ENSMUST00000144269	-2.50831	0.0169163	DOWN	ENSMUSG00000047671	Q8CDY7	Tctex1d4	Tctex1 domain-containing protein 4 [Source:UniProtKB/Swiss-Prot;Acc:Q8CDY7]
70021	ENSMUST00000227794	-2.47895	0.030354	DOWN	ENSMUSG00000071547	Q91X76	Nt5dc2	5'-nucleotidase domain containing 2
15042	ENSMUST00000174063	-2.45988	0.00727131	DOWN	ENSMUSG00000053835	F8VQG4	H2-T24	histocompatibility 2, T region locus 24
100503915	ENSMUST00000171192	-2.44932	0.00976977	DOWN	ENSMUSG00000071724	D6MZJ6	Smpd5	sphingomyelin phosphodiesterase 5 [Source:MGI Symbol;Acc:MGI:3709877]
15587	ENSMUST00000193747	-2.44706	0.0373724	DOWN	ENSMUSG00000010047	O35632	Hyal2	Hyaluronidase-2 [Source:UniProtKB/Swiss-Prot;Acc:O35632]
114886	ENSMUST00000021166	-2.42739	0.00869311	DOWN	ENSMUSG00000020810	Q546K1	Cygb	Cytoglobin [Source:UniProtKB/Swiss-Prot;Acc:Q9CX80]
75430	ENSMUST00000137949	-2.41657	0.0211552	DOWN	ENSMUSG00000030649	P60007	Anapc15	Anaphase-promoting complex subunit 15 [Source:UniProtKB/Swiss-Prot;Acc:P60007]
19729	ENSMUST00000132445	-2.40779	0.00692738	DOWN	ENSMUSG00000027953	Q9CXK4	Slc50a1	Sugar transporter SWEET1 [Source:UniProtKB/Swiss-Prot;Acc:Q9CXK4]
75612	ENSMUST00000219216	-2.38552	0.0168593	DOWN	ENSMUSG00000034707	Q8BFR4	Gns	glucosamine (N-acetyl)-6-sulfatase
30931	ENSMUST00000137694	-2.36597	0.0494895	DOWN	ENSMUSG00000026849	Q9ER39	Tor1a	torsin family 1, member A (torsin A) [Source:MGI Symbol;Acc:MGI:1353568]
233802	ENSMUST00000033236	-2.36497	0.000109791	DOWN	ENSMUSG00000030942	Q99J36	Thumpd1	THUMP domain-containing protein 1 [Source:UniProtKB/Swiss-Prot;Acc:Q99J36]
240025	ENSMUST00000053218	-2.36373	0.00480838	DOWN	ENSMUSG00000048826	Q7TN08	Dact2	dishevelled-binding antagonist of beta-catenin 2
29815	ENSMUST00000197956	-2.36064	0.0130169	DOWN	ENSMUSG00000028121	Q9QZK2	Bcar3	Breast cancer anti-estrogen resistance protein 3 [Source:UniProtKB/Swiss-Prot;Acc:Q9QZK2]
140481	ENSMUST00000205318	-2.35957	0.0184779	DOWN	ENSMUSG00000038886	Q197W7	Man2a2	Alpha-mannosidase 2x [Source:UniProtKB/Swiss-Prot;Acc:Q8BRK9]
94112	ENSMUST00000012259	-2.34533	0.000147938	DOWN	ENSMUSG00000012114	E9Q7C1	Med15	mediator complex subunit 15
78232	ENSMUST00000021380	-2.34392	0.00309003	DOWN	ENSMUSG00000020993	Q9D289	Trappc6b	trafficking protein particle complex 6B
67946	ENSMUST00000038868	-2.33188	0.0295481	DOWN	ENSMUSG00000034401	Q3U6K5	Spata6	Spermatosis-associated protein 6 [Source:UniProtKB/Swiss-Prot;Acc:Q3U6K5]
19703	ENSMUST00000116578	-2.3306	0.00847692	DOWN	ENSMUSG00000031387	P82343	Renbp	N-acylglucosamine 2-epimerase [Source:UniProtKB/Swiss-Prot;Acc:P82343]
68212	ENSMUST00000145015	-2.32942	0.0198935	DOWN	ENSMUSG00000020225	Q9DA39	Tmbim4	transmembrane BAX inhibitor motif containing 4 [Source:MGI Symbol;Acc:MGI:1915462]
27392	ENSMUST00000186485	-2.32901	0.00350329	DOWN	ENSMUSG00000056536	G3X9F1	Pign	phosphatidylinositol glycan anchor biosynthesis class N [Source:HGNC Symbol;Acc:HGNC:8967]
213234	ENSMUST00000107776	-2.32609	0.0411747	DOWN	ENSMUSG00000034151	Q0P5X5	Zbbx	zinc finger, B-box domain containing [Source:MGI Symbol;Acc:MGI:2674085]
67115	ENSMUST00000215063	-2.32158	0.0027312	DOWN	ENSMUSG00000025794	Q9CR57	Rpl14	60S ribosomal protein L14 [Source:UniProtKB/Swiss-Prot;Acc:Q9CR57]
104871	ENSMUST00000222195	-2.3191	0.022858	DOWN	ENSMUSG00000021007	Q80VP2	Spata7	spermatogenesis associated 7 [Source:MGI Symbol;Acc:MGI:2144877]
20861	ENSMUST00000042097	-2.31765	0.0355724	DOWN	ENSMUSG00000071562	P35175	Stfa1	stefin A1
27223	ENSMUST00000147540	-2.31385	0.00589139	DOWN	ENSMUSG00000043909	Q8BZ87	Trp53bp1	TP53-binding protein 1 [Source:UniProtKB/Swiss-Prot;Acc:P70399]
67803	ENSMUST00000138094	-2.31206	0.0295277	DOWN	ENSMUSG00000040699	Q8BGB5	Limd2	Mus musculus LIM domain containing 2 (Limd2), transcript variant 3, mRNA. [Source:RefSeq mRNA;Acc:NM_001356459]
22235	ENSMUST00000031103	-2.30918	0.00032824	DOWN	ENSMUSG00000029201	Q3TS38	Ugdh	UDP-glucose dehydrogenase [Source:MGI Symbol;Acc:MGI:1306785]
27993	ENSMUST00000134327	-2.30154	0.0032644	DOWN	ENSMUSG00000026127	Q8VHZ7	Imp4	U3 small nucleolar ribonucleoprotein protein IMP4 [Source:UniProtKB/Swiss-Prot;Acc:Q8VHZ7]
77254	ENSMUST00000108238	-2.29687	0.0118856	DOWN	ENSMUSG00000030588	Q9CX30	Yif1b	Yip1 interacting factor homolog B (S. cerevisiae) [Source:MGI Symbol;Acc:MGI:1924504]
264064	ENSMUST00000160924	-2.29211	0.00605473	DOWN	ENSMUSG00000029635	Q8R3L8	Cdk8	Cyclin-dependent kinase 8 [Source:UniProtKB/Swiss-Prot;Acc:Q8R3L8]
66366	ENSMUST00000144707	-2.278	0.0412092	DOWN	ENSMUSG00000005881	Q9CQE7	Ergic3	Mus musculus ERGIC and golgi 3 (Ergic3), transcript variant 2, mRNA. [Source:RefSeq mRNA;Acc:NM_001356414]
71777	ENSMUST00000144534	-2.27296	0.00031139	DOWN	ENSMUSG00000029670	Q8VEK6	Ing3	Inhibitor of growth protein 3 [Source:UniProtKB/Swiss-Prot;Acc:Q8VEK6]
231532	ENSMUST00000070000	-2.27232	0.00756508	DOWN	ENSMUSG00000057315	G3X9N1	Arhgap24	Rho GTPase activating protein 24 [Source:MGI Symbol;Acc:MGI:1922647]
28135	ENSMUST00000162655	-2.26753	0.00757678	DOWN	ENSMUSG00000032534	U5KVR9	Cep63	Centrosomal protein of 63 kDa [Source:UniProtKB/Swiss-Prot;Acc:Q3UPP8]
74211	ENSMUST00000213199	-2.25892	0.0250554	DOWN	ENSMUSG00000032300	Q3TEI4	1700017B05Rik	RIKEN cDNA 1700017B05 gene [Source:MGI Symbol;Acc:MGI:1921461]
18643	ENSMUST00000178254	-2.24862	0.0286073	DOWN	ENSMUSG00000018293	Q5SX50	Pfn1	profilin 1 [Source:MGI Symbol;Acc:MGI:97549]
74694	ENSMUST00000218688	-2.24376	0.0415911	DOWN	ENSMUSG00000052302	Q69ZT9	Tbc1d30	TBC1 domain family, member 30
14897	ENSMUST00000027421	-2.24221	0.0184023	DOWN	ENSMUSG00000026219	G5E870	Trip12	thyroid hormone receptor interactor 12 [Source:MGI Symbol;Acc:MGI:1309481]
11949	ENSMUST00000114897	-2.24153	0.0057486	DOWN	ENSMUSG00000025781	Q91VR2	Atp5c1	ATP synthase subunit gamma, mitochondrial [Source:UniProtKB/Swiss-Prot;Acc:Q91VR2]
13629	ENSMUST00000219497	-2.24112	0.0240146	DOWN	ENSMUSG00000034994	P58252	Eef2	eukaryotic translation elongation factor 2
56452	ENSMUST00000170141	-2.23516	0.00220767	DOWN	ENSMUSG00000031697	Q3TQX1	Orc6	origin recognition complex subunit 6 [Source:HGNC Symbol;Acc:HGNC:17151]
12842	ENSMUST00000148593	-2.21312	0.0474641	DOWN	ENSMUSG00000001506	P11087	Col1a1	Collagen alpha-1(I) chain [Source:UniProtKB/Swiss-Prot;Acc:P11087]
56449	ENSMUST00000087865	-2.20964	0.0169013	DOWN	ENSMUSG00000030189	Q68G78	Ybx3	Y box protein 3 [Source:MGI Symbol;Acc:MGI:2137670]
21387	ENSMUST00000108047	-2.20484	0.0249351	DOWN	ENSMUSG00000000094	Q8BSY3	Tbx4	T-box 4 [Source:MGI Symbol;Acc:MGI:102556]
50770	ENSMUST00000091237	-2.19336	0.0142458	DOWN	ENSMUSG00000031441	P98197	Atp11a	Probable phospholipid-transporting ATPase IH [Source:UniProtKB/Swiss-Prot;Acc:P98197]
382137	ENSMUST00000176619	-2.19179	0.0183443	DOWN	ENSMUSG00000037845	Q3UY23	Fdxacb1	Ferredoxin-fold anticodon-binding domain-containing [Source:UniProtKB/Swiss-Prot;Acc:Q3UY23]
70676	ENSMUST00000160854	-2.1861	0.00300295	DOWN	ENSMUSG00000056870	Q8K2A1	Gulp1	PTB domain-containing engulfment adapter protein 1 [Source:UniProtKB/Swiss-Prot;Acc:Q8K2A1]
74200	ENSMUST00000197300	-2.18393	0.00130512	DOWN	ENSMUSG00000028060	Q3TCX3	2810403A07Rik	Protein BLOM7 [Source:UniProtKB/Swiss-Prot;Acc:Q3TCX3]
12575	ENSMUST00000023829	-2.1801	0.00566031	DOWN	ENSMUSG00000023067	Q564P6	Cdkn1a	Cyclin-dependent kinase inhibitor 1 [Source:UniProtKB/Swiss-Prot;Acc:P39689]
319944	ENSMUST00000226864	-2.1733	0.00237411	DOWN	ENSMUSG00000037343	B9EJX5	Taf2	TATA-box binding protein associated factor 2
69080	ENSMUST00000140287	-2.17239	0.012966	DOWN	ENSMUSG00000033021	Q922H4	Gmppa	GDP-mannose pyrophosphorylase A [Source:MGI Symbol;Acc:MGI:1916330]
380753	ENSMUST00000125192	-2.1655	0.0177045	DOWN	ENSMUSG00000020564	Q9CZ05	Atxn7l1	Ataxin-7-like protein 1 [Source:UniProtKB/Swiss-Prot;Acc:Q9CZ05]
50523	ENSMUST00000022531	-2.15994	0.022759	DOWN	ENSMUSG00000021959	Q7TSJ6	Lats2	Serine/threonine-protein kinase LATS2 [Source:UniProtKB/Swiss-Prot;Acc:Q7TSJ6]
19263	ENSMUST00000218601	-2.15769	0.0366849	DOWN	ENSMUSG00000020154	B2RU80	Ptprb	protein tyrosine phosphatase, receptor type, B
215798	ENSMUST00000041168	-2.15314	0.00350092	DOWN	ENSMUSG00000039116	Q6F3F9	Adgrg6	Adhesion G-protein coupled receptor G6 ADGRG6 N-terminal fragment ADGRG6 C-terminal fragment [Source:UniProtKB/Swiss-Prot;Acc:Q6F3F9]
13360	ENSMUST00000128610	-2.15095	0.0364875	DOWN	ENSMUSG00000058454	O88455	Dhcr7	7-dehydrocholesterol reductase [Source:UniProtKB/Swiss-Prot;Acc:O88455]
102566	ENSMUST00000214507	-2.12709	0.000934579	DOWN	ENSMUSG00000037949	Q8BH79	Ano10	Anoctamin-10 [Source:UniProtKB/Swiss-Prot;Acc:Q8BH79]
69697	ENSMUST00000207930	-2.10866	0.0287674	DOWN	ENSMUSG00000044433	U5LK19	Camsap3	Calmodulin-regulated spectrin-associated protein 3 [Source:UniProtKB/Swiss-Prot;Acc:Q80VC9]
192786	ENSMUST00000102743	-2.10386	0.00410695	DOWN	ENSMUSG00000037533	Q3TKC6	Rapgef6	Rap guanine nucleotide exchange factor (GEF) 6 [Source:MGI Symbol;Acc:MGI:2384761]
14199	ENSMUST00000144600	-2.10045	0.0149982	DOWN	ENSMUSG00000023092	P97447	Fhl1	Four and a half LIM domains protein 1 [Source:UniProtKB/Swiss-Prot;Acc:P97447]
109910	ENSMUST00000038627	-2.09763	0.044003	DOWN	ENSMUSG00000024695	Q62511	Zfp91	zinc finger protein 91 [Source:MGI Symbol;Acc:MGI:104854]
320951	ENSMUST00000202641	-2.09486	0.0272674	DOWN	ENSMUSG00000023452	Q505E1	Pisd	phosphatidylserine decarboxylase [Source:MGI Symbol;Acc:MGI:2445114]
14603	ENSMUST00000025585	-2.09156	0.00735817	DOWN	ENSMUSG00000024682	P52787	Gif	Gastric intrinsic factor [Source:UniProtKB/Swiss-Prot;Acc:P52787]
208263	ENSMUST00000130995	-2.0834	0.0363644	DOWN	ENSMUSG00000026466	Q921T2	Tor1aip1	torsin A interacting protein 1 [Source:MGI Symbol;Acc:MGI:3582693]
20044	ENSMUST00000122279	-2.08328	0.0201689	DOWN	ENSMUSG00000024608	P62264	Rps14	40S ribosomal protein S14 [Source:UniProtKB/Swiss-Prot;Acc:P62264]
70693	ENSMUST00000030971	-2.07604	0.0483456	DOWN	ENSMUSG00000029090	Q7TT36	Adgra3	Adhesion G protein-coupled receptor A3 [Source:UniProtKB/Swiss-Prot;Acc:Q7TT36]
69671	ENSMUST00000131599	-2.07595	0.0313117	DOWN	ENSMUSG00000023153	Q9D702	Tmem52	transmembrane protein 52 [Source:MGI Symbol;Acc:MGI:1916921]
71723	ENSMUST00000163968	-2.07132	0.0108331	DOWN	ENSMUSG00000006019	Q9DBV3	Dhx34	DExH-box helicase 34 [Source:HGNC Symbol;Acc:HGNC:16719]
215351	ENSMUST00000165607	-2.06458	0.0123347	DOWN	ENSMUSG00000034252	Q6P7W0	Senp6	SUMO/sentrin specific peptidase 6 [Source:MGI Symbol;Acc:MGI:1922075]
56360	ENSMUST00000134662	-2.05948	0.0389735	DOWN	ENSMUSG00000025287	Q9R0X4	Acot9	Acyl-coenzyme A thioesterase 9, mitochondrial [Source:UniProtKB/Swiss-Prot;Acc:Q9R0X4]
234371	ENSMUST00000126268	-2.05536	0.042917	DOWN	ENSMUSG00000002342	Q8VCA6	Tmem161a	Transmembrane protein 161A [Source:UniProtKB/Swiss-Prot;Acc:Q8VCA6]
102626	ENSMUST00000143487	-2.04844	0.0072231	DOWN	ENSMUSG00000032577	Q3UMW7	Mapkapk3	MAP kinase-activated protein kinase 3 [Source:UniProtKB/Swiss-Prot;Acc:Q3UMW7]
71908	ENSMUST00000060128	-2.0407	0.0121879	DOWN	ENSMUSG00000055976	Q9D7D7	Cldn23	Claudin-23 [Source:UniProtKB/Swiss-Prot;Acc:Q9D7D7]
209039	ENSMUST00000228958	-2.03851	0.0078194	DOWN	ENSMUSG00000037003	Q8CGB6	Tns2	tensin 2
66126	ENSMUST00000013966	-2.03732	0.0483566	DOWN	ENSMUSG00000013822	Q545S6	Elof1	Mus musculus ELF1 homolog, elongation factor 1 (Elof1), transcript variant 4, mRNA. [Source:RefSeq mRNA;Acc:NM_001357311]
216190	ENSMUST00000150685	-2.0106	0.0213336	DOWN	ENSMUSG00000020263	Q3TVI6	Appl2	DCC-interacting protein 13-beta [Source:UniProtKB/Swiss-Prot;Acc:Q8K3G9]
78339	ENSMUST00000198765	-2.00927	0.0202942	DOWN	ENSMUSG00000036565	Q6P5F7	Ttyh3	tweety family member 3 [Source:MGI Symbol;Acc:MGI:1925589]
208943	ENSMUST00000213424	-2.00311	0.0283253	DOWN	ENSMUSG00000033590	E9Q1F5	Myo5c	myosin VC [Source:HGNC Symbol;Acc:HGNC:7604]
232798	ENSMUST00000154571	-1.99686	0.0234824	DOWN	ENSMUSG00000035545	Q8CBY3	Leng8	Leukocyte receptor cluster member 8 homolog [Source:UniProtKB/Swiss-Prot;Acc:Q8CBY3]
107976	ENSMUST00000202293	-1.99489	0.0106069	DOWN	ENSMUSG00000052139	Q8K3W0	Babam2	BRISC and BRCA1-A complex member 2 [Source:UniProtKB/Swiss-Prot;Acc:Q8K3W0]
276829	ENSMUST00000108500	-1.98611	0.0227473	DOWN	ENSMUSG00000045667	Q8CI12	Smtnl2	Smoothelin-like protein 2 [Source:UniProtKB/Swiss-Prot;Acc:Q8CI12]
103850	ENSMUST00000102695	-1.98408	0.00556996	DOWN	ENSMUSG00000032615	Q8VCE6	Nt5m	5'(3')-deoxyribonucleotidase, mitochondrial [Source:UniProtKB/Swiss-Prot;Acc:Q8VCE6]
19185	ENSMUST00000147960	-1.97908	0.00601589	DOWN	ENSMUSG00000005625	O35226	Psmd4	26S proteasome non-ATPase regulatory subunit 4 [Source:UniProtKB/Swiss-Prot;Acc:O35226]
12036	ENSMUST00000033098	-1.97763	0.0363622	DOWN	ENSMUSG00000030826	Q3ULU3	Bcat2	Branched-chain-amino-acid aminotransferase, mitochondrial [Source:UniProtKB/Swiss-Prot;Acc:O35855]
77963	ENSMUST00000030306	-1.96802	0.0046282	DOWN	ENSMUSG00000028572	Q8BIL5	Hook1	1 [Source:UniProtKB/Swiss-Prot;Acc:Q8BIL5]
73667	ENSMUST00000095823	-1.96333	0.0318351	DOWN	ENSMUSG00000071398	D3Z430	2410004P03Rik	RIKEN cDNA 2410004P03 gene [Source:MGI Symbol;Acc:MGI:1920917]
93734	ENSMUST00000128757	-1.95225	0.00903316	DOWN	ENSMUSG00000022679	Q99MS3	Mpv17l	Mpv17-like protein [Source:UniProtKB/Swiss-Prot;Acc:Q99MS3]
59052	ENSMUST00000207835	-1.94715	0.0116806	DOWN	ENSMUSG00000030876	Q9EPL4	Mettl9	Methyltransferase-like protein 9 [Source:UniProtKB/Swiss-Prot;Acc:Q9EPL4]
192136	ENSMUST00000068545	-1.93584	0.0348473	DOWN	ENSMUSG00000055137	Q7TNE1	Sugct	succinyl-CoA glutarate-CoA transferase
27364	ENSMUST00000065211	-1.93493	0.00211832	DOWN	ENSMUSG00000001323	Q9QZX7	Srr	Serine racemase [Source:UniProtKB/Swiss-Prot;Acc:Q9QZX7]
108012	ENSMUST00000112294	-1.9336	0.0482886	DOWN	ENSMUSG00000031367	Q9DB50	Ap1s2	AP-1 complex subunit sigma-2 [Source:UniProtKB/Swiss-Prot;Acc:Q9DB50]
17686	ENSMUST00000191304	-1.92953	0.0255537	DOWN	ENSMUSG00000014850	A0A087WQ16	Msh3	mutS homolog 3 [Source:HGNC Symbol;Acc:HGNC:7326]
76551	ENSMUST00000147545	-1.92835	0.0346079	DOWN	ENSMUSG00000048701	D3YZP9	Ccdc6	Coiled-coil domain-containing protein 6 [Source:UniProtKB/Swiss-Prot;Acc:D3YZP9]
329178	ENSMUST00000061620	-1.92792	0.000568294	DOWN	ENSMUSG00000055567	Q8BLN6	Unc80	unc-80, NALCN activator [Source:MGI Symbol;Acc:MGI:2652882]
13638	ENSMUST00000029673	-1.92598	0.00747649	DOWN	ENSMUSG00000028039	O08545	Efna3	Ephrin-A3 [Source:UniProtKB/Swiss-Prot;Acc:O08545]
56295	ENSMUST00000215007	-1.92546	0.0313205	DOWN	ENSMUSG00000038412	Q9JLR9	Higd1a	HIG1 domain family, member 1A [Source:MGI Symbol;Acc:MGI:1930666]
224088	ENSMUST00000061350	-1.92393	0.041371	DOWN	ENSMUSG00000022533	Q5XF89	Atp13a3	Probable cation-transporting ATPase 13A3 [Source:UniProtKB/Swiss-Prot;Acc:Q5XF89]
12747	ENSMUST00000156931	-1.92292	0.0148215	DOWN	ENSMUSG00000026034	P22518	Clk1	Dual specificity protein kinase CLK1 [Source:UniProtKB/Swiss-Prot;Acc:P22518]
66505	ENSMUST00000130151	-1.91516	0.0137032	DOWN	ENSMUSG00000021156	Q3UKS1	Zmynd11	zinc finger, MYND domain containing 11 [Source:MGI Symbol;Acc:MGI:1913755]
114249	ENSMUST00000093971	-1.91143	0.00300533	DOWN	ENSMUSG00000040998	Q91V88	Npnt	Nephronectin [Source:UniProtKB/Swiss-Prot;Acc:Q91V88]
59029	ENSMUST00000154627	-1.90627	0.0237749	DOWN	ENSMUSG00000026914	O35593	Psmd14	26S proteasome non-ATPase regulatory subunit 14 [Source:UniProtKB/Swiss-Prot;Acc:O35593]
13717	ENSMUST00000202620	-1.90504	0.00549766	DOWN	ENSMUSG00000029675	P54320	Eln	Elastin [Source:UniProtKB/Swiss-Prot;Acc:P54320]
21665	ENSMUST00000142658	-1.88981	0.0119688	DOWN	ENSMUSG00000034674	P56581	Tdg	Mus musculus thymine DNA glycosylase (Tdg), transcript variant 3, mRNA. [Source:RefSeq mRNA;Acc:NM_001358517]
14977	ENSMUST00000167145	-1.88917	0.0146236	DOWN	ENSMUSG00000024327	Q31125	Slc39a7	solute carrier family 39 (zinc transporter), member 7 [Source:MGI Symbol;Acc:MGI:95909]
13617	ENSMUST00000034029	-1.88676	0.00971342	DOWN	ENSMUSG00000031616	Q61614	Ednra	Endothelin-1 receptor [Source:UniProtKB/Swiss-Prot;Acc:Q61614]
215387	ENSMUST00000152806	-1.88388	0.0220619	DOWN	ENSMUSG00000034906	Q8C156	Ncaph	non-SMC condensin I complex, subunit H [Source:MGI Symbol;Acc:MGI:2444777]
11865	ENSMUST00000209495	-1.8819	0.00704124	DOWN	ENSMUSG00000055116	Q9WTL8	Arntl	Mus musculus aryl hydrocarbon receptor nuclear translocator-like (Arntl), transcript variant 3, mRNA. [Source:RefSeq mRNA;Acc:NM_001357070]
12905	ENSMUST00000220279	-1.88084	0.0113714	DOWN	ENSMUSG00000045867	Q549T4	Cradd	CASP2 and RIPK1 domain containing adaptor with death domain
11861	ENSMUST00000146905	-1.88082	0.00715027	DOWN	ENSMUSG00000047446	P61213	Arl4a	ADP-ribosylation factor-like protein 4A [Source:UniProtKB/Swiss-Prot;Acc:P61213]
101187	ENSMUST00000112193	-1.8757	0.0359203	DOWN	ENSMUSG00000037997	Q8CFF0	Parp11	Mus musculus poly (ADP-ribose) polymerase family, member 11 (Parp11), transcript variant 3, mRNA. [Source:RefSeq mRNA;Acc:NM_001346513]
51897	ENSMUST00000076803	-1.87011	0.0184905	DOWN	ENSMUSG00000027244	Q91YI1	Atg13	Mus musculus autophagy related 13 (Atg13), transcript variant 4, mRNA. [Source:RefSeq mRNA;Acc:NM_001355419]
69605	ENSMUST00000154706	-1.86921	0.0010121	DOWN	ENSMUSG00000009207	Q7TQ95	Lnpk	lunapark, ER junction formation factor [Source:MGI Symbol;Acc:MGI:1918115]
73122	ENSMUST00000187872	-1.86253	0.0224815	DOWN	ENSMUSG00000070939	Q3UR70	Tgfbrap1	Mus musculus transforming growth factor, beta receptor associated protein 1 (Tgfbrap1), transcript variant 2, mRNA. [Source:RefSeq mRNA;Acc:NM_001357299]
216881	ENSMUST00000138339	-1.8505	0.00859442	DOWN	ENSMUSG00000020811	Q80XH4	Wscd1	WSC domain containing 1 [Source:MGI Symbol;Acc:MGI:2448493]
72432	ENSMUST00000069245	-1.84422	0.000685507	DOWN	ENSMUSG00000055561	Q148R4	Spink5	serine peptidase inhibitor, Kazal type 5 [Source:MGI Symbol;Acc:MGI:1919682]
623121	ENSMUST00000150649	-1.83486	0.0128403	DOWN	ENSMUSG00000073491	Q3UPZ5	Ifi213	interferon activated gene 213
12476	ENSMUST00000058746	-1.83473	0.0316767	DOWN	ENSMUSG00000025510	O35566	Cd151	CD151 antigen [Source:UniProtKB/Swiss-Prot;Acc:O35566]
319719	ENSMUST00000121401	-1.8328	0.0160009	DOWN	ENSMUSG00000043183	Q505H0	Simc1	SUMO interacting motifs containing 1 [Source:HGNC Symbol;Acc:HGNC:24779]
66365	ENSMUST00000153776	-1.8328	0.0352482	DOWN	ENSMUSG00000030613	Q8C3X2	Ccdc90b	Coiled-coil domain-containing protein 90B, mitochondrial [Source:UniProtKB/Swiss-Prot;Acc:Q8C3X2]
12282	ENSMUST00000161318	-1.83216	0.0217073	DOWN	ENSMUSG00000032115	Q9JKR6	Hyou1	Hypoxia up-regulated protein 1 [Source:UniProtKB/Swiss-Prot;Acc:Q9JKR6]
71715	ENSMUST00000145692	-1.82639	0.0259403	DOWN	ENSMUSG00000027655	Q8K1G9,A2ACP9,A2ACQ1	Dhx35	probable ATP-dependent RNA helicase DHX35 isoform b [Source:RefSeq peptide;Acc:NP_001278073]
76650	ENSMUST00000041500	-1.82348	0.026892	DOWN	ENSMUSG00000032802	A2AQU8	Srxn1	sulfiredoxin 1 [Source:HGNC Symbol;Acc:HGNC:16132]
12740	ENSMUST00000051401	-1.81831	0.00192495	DOWN	ENSMUSG00000047501	Q3UM35	Cldn4	Claudin-4 [Source:UniProtKB/Swiss-Prot;Acc:O35054]
70967	ENSMUST00000130868	-1.81734	0.0210093	DOWN	ENSMUSG00000039903	Q8CAX0	Eva1c	C [Source:UniProtKB/Swiss-Prot;Acc:P58659]
72895	ENSMUST00000149584	-1.81384	0.00586088	DOWN	ENSMUSG00000034269	Q5XJV7	Setd5	Mus musculus SET domain containing 5 (Setd5), transcript variant 2, mRNA. [Source:RefSeq mRNA;Acc:NM_173005]
104418	ENSMUST00000124427	-1.81377	0.0167203	DOWN	ENSMUSG00000040479	Q80UP3	Dgkz	Diacylglycerol kinase zeta [Source:UniProtKB/Swiss-Prot;Acc:Q80UP3]
108652	ENSMUST00000225396	-1.79786	0.00194567	DOWN	ENSMUSG00000021432	Q922Q5	Slc35b3	solute carrier family 35, member B3
23959	ENSMUST00000186789	-1.79441	0.0328267	DOWN	ENSMUSG00000032420	Q0VEE0	Nt5e	5' nucleotidase, ecto [Source:MGI Symbol;Acc:MGI:99782]
56194	ENSMUST00000132031	-1.79018	0.0293247	DOWN	ENSMUSG00000061136	Q9R1C7	Prpf40a	Pre-mRNA-processing factor 40 homolog A [Source:UniProtKB/Swiss-Prot;Acc:Q9R1C7]
17151	ENSMUST00000099489	-1.79015	0.0076654	DOWN	ENSMUSG00000023572	Q3TVC7	Ccndbp1	Cyclin-D1-binding protein 1 [Source:UniProtKB/Swiss-Prot;Acc:Q3TVC7]
381626	ENSMUST00000114884	-1.78724	0.0236199	DOWN	ENSMUSG00000048271	Q9CXK9	Rbm33	RNA-binding protein 33 [Source:UniProtKB/Swiss-Prot;Acc:Q9CXK9]
73852	ENSMUST00000195577	-1.78603	0.0445307	DOWN	ENSMUSG00000025766	Q8BGN2	D3Ertd751e	DNA segment, Chr 3, ERATO Doi 751, expressed [Source:MGI Symbol;Acc:MGI:1289213]
67772	ENSMUST00000147827	-1.78591	0.0200757	DOWN	ENSMUSG00000053754	Q09XV5	Chd8	Chromodomain-helicase-DNA-binding protein 8 [Source:UniProtKB/Swiss-Prot;Acc:Q09XV5]
17470	ENSMUST00000172091	-1.77696	0.00329011	DOWN	ENSMUSG00000022661	Q80VX2	Cd200	CD200 antigen [Source:MGI Symbol;Acc:MGI:1196990]
29875	ENSMUST00000205606	-1.76328	0.0320263	DOWN	ENSMUSG00000030536	Q3TU98	Iqgap1	Ras GTPase-activating-like protein IQGAP1 [Source:UniProtKB/Swiss-Prot;Acc:Q9JKF1]
100041546	ENSMUST00000187864	-1.76249	0.00461191	DOWN	ENSMUSG00000022584	P0CW03	Ly6c2	Mus musculus lymphocyte antigen 6 complex, locus C2 (Ly6c2), transcript variant 1, mRNA. [Source:RefSeq mRNA;Acc:NM_001357693]
20200	ENSMUST00000001051	-1.76227	0.0120985	DOWN	ENSMUSG00000001025	Q545I9	S100a6	S100 calcium binding protein A6 (calcyclin) [Source:MGI Symbol;Acc:MGI:1339467]
321008	ENSMUST00000119139	-1.76203	0.0146265	DOWN	ENSMUSG00000070814	A0A0R4J1C4	Zswim9	zinc finger SWIM-type containing 9
104725	ENSMUST00000056228	-1.75787	0.0444734	DOWN	ENSMUSG00000044408	Q8R207	Sptssa	serine palmitoyltransferase, small subunit A
13872	ENSMUST00000025241	-1.75728	0.00914199	DOWN	ENSMUSG00000024382	P49135	Ercc3	TFIIH basal transcription factor complex helicase XPB subunit [Source:UniProtKB/Swiss-Prot;Acc:P49135]
17750	ENSMUST00000034214	-1.75369	0.00041515	DOWN	ENSMUSG00000031762	P02798	Mt2	Metallothionein-2 [Source:UniProtKB/Swiss-Prot;Acc:P02798]
75686	ENSMUST00000035179	-1.75364	0.0464662	DOWN	ENSMUSG00000032565	Q6P3D0	Nudt16	U8 snoRNA-decapping enzyme [Source:UniProtKB/Swiss-Prot;Acc:Q6P3D0]
214585	ENSMUST00000135847	-1.75225	0.0271011	DOWN	ENSMUSG00000033396	Q3UHA3	Spg11	Spatacsin [Source:UniProtKB/Swiss-Prot;Acc:Q3UHA3]
67268	ENSMUST00000128179	-1.75191	0.0121029	DOWN	ENSMUSG00000024048	Q6ZWQ9	Myl12a	myosin, light chain 12A, regulatory, non-sarcomeric
53315	ENSMUST00000113314	-1.7518	0.0302802	DOWN	ENSMUSG00000029273	Q3UZZ6	Sult1d1	Sulfotransferase 1 family member D1 [Source:UniProtKB/Swiss-Prot;Acc:Q3UZZ6]
72587	ENSMUST00000176753	-1.74802	0.0119856	DOWN	ENSMUSG00000029647	Q640Q5	Pan3	PAN2-PAN3 deadenylation complex subunit Pan3 [Source:UniProtKB/Swiss-Prot;Acc:Q640Q5]
20874	ENSMUST00000051691	-1.74717	0.045626	DOWN	ENSMUSG00000025060	O54988	Slk	STE20-like serine/threonine-protein kinase [Source:UniProtKB/Swiss-Prot;Acc:O54988]
20479	ENSMUST00000094646	-1.74652	0.0176627	DOWN	ENSMUSG00000009907	Q8BM73	Vps4b	vacuolar protein sorting 4B [Source:MGI Symbol;Acc:MGI:1100499]
11501	ENSMUST00000106069	-1.74352	0.0116226	DOWN	ENSMUSG00000025473	Q3U1J7	Adam8	Disintegrin and metalloproteinase domain-containing protein 8 [Source:UniProtKB/Swiss-Prot;Acc:Q05910]
100637	ENSMUST00000202031	-1.74335	0.00168745	DOWN	ENSMUSG00000041132	Q3V2Q8	N4bp2l1	NEDD4-binding protein 2-like 1 [Source:UniProtKB/Swiss-Prot;Acc:Q3V2Q8]
18452	ENSMUST00000019050	-1.74149	0.0473109	DOWN	ENSMUSG00000018906	Q5SX74	P4ha2	Prolyl 4-hydroxylase subunit alpha-2 [Source:UniProtKB/Swiss-Prot;Acc:Q60716]
20201	ENSMUST00000069927	-1.73822	0.0044389	DOWN	ENSMUSG00000056054	Q53X15	S100a8	S100 calcium binding protein A8 (calgranulin A) [Source:MGI Symbol;Acc:MGI:88244]
50500	ENSMUST00000098244	-1.73711	0.0266814	DOWN	ENSMUSG00000073988	Q8BWP5	Ttpa	tocopherol (alpha) transfer protein [Source:MGI Symbol;Acc:MGI:1354168]
71151	ENSMUST00000150844	-1.73444	0.0294651	DOWN	ENSMUSG00000030929	Q5BKS4	Eri2	Mus musculus exoribonuclease 2 (Eri2), transcript variant 2, mRNA. [Source:RefSeq mRNA;Acc:NM_001355104]
17939	ENSMUST00000230139	-1.73357	0.00418266	DOWN	ENSMUSG00000022453	Q3U6T2	Naga	N-acetyl galactosaminidase, alpha
66236	ENSMUST00000061251	-1.73076	0.0384988	DOWN	ENSMUSG00000072694	Q3TTH7,Q3V495,Q3TMY3	1500011B03Rik	RIKEN cDNA 1500011B03 gene [Source:MGI Symbol;Acc:MGI:1913486]
54616	ENSMUST00000022550	-1.73042	0.0231955	DOWN	ENSMUSG00000021978	Q6P1H4	Extl3	exostoses (multiple)-like 3
26572	ENSMUST00000136901	-1.72607	0.0107662	DOWN	ENSMUSG00000019373	Q3UQL2	Cops3	COP9 signalosome complex subunit 3 [Source:UniProtKB/Swiss-Prot;Acc:O88543]
16979	ENSMUST00000049285	-1.72585	0.00758048	DOWN	ENSMUSG00000034648	Q61809	Lrrn1	Leucine-rich repeat neuronal protein 1 [Source:UniProtKB/Swiss-Prot;Acc:Q61809]
20471	ENSMUST00000050029	-1.72513	0.030763	DOWN	ENSMUSG00000051367	Q8BSP4	Six1	Homeobox protein SIX1 [Source:UniProtKB/Swiss-Prot;Acc:Q62231]
72368	ENSMUST00000002418	-1.72473	0.00511414	DOWN	ENSMUSG00000002345	Q9D6Y4	Borcs8	BLOC-1-related complex subunit 8 [Source:UniProtKB/Swiss-Prot;Acc:Q9D6Y4]
51798	ENSMUST00000127590	-1.72202	0.028117	DOWN	ENSMUSG00000053898	O35459	Ech1	Delta(3,5)-Delta(2,4)-dienoyl-CoA isomerase, mitochondrial [Source:UniProtKB/Swiss-Prot;Acc:O35459]
67025	ENSMUST00000133613	-1.7206	0.0475911	DOWN	ENSMUSG00000059291	Q9CXW4	Rpl11	60S ribosomal protein L11 [Source:UniProtKB/Swiss-Prot;Acc:Q9CXW4]
67887	ENSMUST00000211664	-1.71367	0.00747555	DOWN	ENSMUSG00000031532	A0A0R4J0D1	Saraf	store-operated calcium entry associated regulatory factor [Source:HGNC Symbol;Acc:HGNC:28789]
231655	ENSMUST00000112143	-1.71209	0.02251	DOWN	ENSMUSG00000041827	Q8VI94	Oasl1	2'-5'-oligoadenylate synthase-like protein 1 [Source:UniProtKB/Swiss-Prot;Acc:Q8VI94]
21847	ENSMUST00000074043	-1.71097	0.000157524	DOWN	ENSMUSG00000037465	O89091	Klf10	Kruppel-like factor 10
14266	ENSMUST00000033532	-1.70678	0.015816	DOWN	ENSMUSG00000031189	O55112	Aff2	AF4/FMR2 family member 2 [Source:UniProtKB/Swiss-Prot;Acc:O55112]
66821	ENSMUST00000027358	-1.70447	0.0420484	DOWN	ENSMUSG00000026172	Q9CZP5	Bcs1l	Mitochondrial chaperone BCS1 [Source:UniProtKB/Swiss-Prot;Acc:Q9CZP5]
12033	ENSMUST00000218942	-1.70262	0.0129424	DOWN	ENSMUSG00000020650	Q542A1	Bcap29	B cell receptor associated protein 29
19165	ENSMUST00000149590	-1.70242	0.0151132	DOWN	ENSMUSG00000010609	Q3U4P5	Psen2	presenilin 2 [Source:HGNC Symbol;Acc:HGNC:9509]
213208	ENSMUST00000125259	-1.70198	0.0179805	DOWN	ENSMUSG00000044244	E9Q9A6	Il20rb	interleukin 20 receptor subunit beta [Source:HGNC Symbol;Acc:HGNC:6004]
71584	ENSMUST00000113744	-1.70082	0.0174887	DOWN	ENSMUSG00000019359	Q9ESM6	Gdpd2	Mus musculus glycerophosphodiester phosphodiesterase domain containing 2 (Gdpd2), transcript variant 3, mRNA. [Source:RefSeq mRNA;Acc:NM_001358507]
13730	ENSMUST00000204299	-1.70008	0.0354031	DOWN	ENSMUSG00000030208	Q4FK43	Emp1	Epithelial membrane protein 1 [Source:UniProtKB/Swiss-Prot;Acc:P47801]
77522	ENSMUST00000031851	-1.69522	0.0458241	DOWN	ENSMUSG00000029829	Q08EA8	Tmem213	transmembrane protein 213 [Source:MGI Symbol;Acc:MGI:1924772]
12142	ENSMUST00000218369	-1.69272	0.0275033	DOWN	ENSMUSG00000038151	Q60636	Prdm1	PR domain zinc finger protein 1 [Source:UniProtKB/Swiss-Prot;Acc:Q60636]
19339	ENSMUST00000110092	-1.69248	0.00120672	DOWN	ENSMUSG00000031840	Q0PD63	Rab3a	RAB3A, member RAS oncogene family [Source:MGI Symbol;Acc:MGI:97843]
12789	ENSMUST00000006020	-1.69016	0.00173238	DOWN	ENSMUSG00000005864	A3KGE1	Cnga2	Cyclic nucleotide-gated olfactory channel [Source:UniProtKB/Swiss-Prot;Acc:Q62398]
11980	ENSMUST00000072971	-1.68823	0.0280233	DOWN	ENSMUSG00000037685	P70704	Atp8a1	Phospholipid-transporting ATPase IA [Source:UniProtKB/Swiss-Prot;Acc:P70704]
68080	ENSMUST00000151173	-1.68661	0.0334823	DOWN	ENSMUSG00000029464	Q9D3W4	Gpn3	GPN-loop GTPase 3 [Source:MGI Symbol;Acc:MGI:1289326]
66556	ENSMUST00000124478	-1.67782	0.0203467	DOWN	ENSMUSG00000024914	Q4FJW2	Drap1	Dr1-associated corepressor [Source:UniProtKB/Swiss-Prot;Acc:Q9D6N5]
16178	ENSMUST00000027243	-1.67703	0.00490826	DOWN	ENSMUSG00000026073	Q4FK69	Il1r2	Interleukin-1 receptor type 2 Interleukin-1 receptor type 2, membrane form Interleukin-1 receptor type 2, soluble form [Source:UniProtKB/Swiss-Prot;Acc:P27931]
21928	ENSMUST00000133865	-1.67256	0.0310343	DOWN	ENSMUSG00000021281	Q61333	Tnfaip2	tumor necrosis factor, alpha-induced protein 2 [Source:MGI Symbol;Acc:MGI:104960]
72772	ENSMUST00000030852	-1.66714	0.0216458	DOWN	ENSMUSG00000028999	Q8BZ36	Rint1	RAD50 interactor 1 [Source:MGI Symbol;Acc:MGI:1916233]
432508	ENSMUST00000176686	-1.66627	0.0018171	DOWN	ENSMUSG00000055531	Q6NVF9	Cpsf6	Cleavage and polyadenylation specificity factor subunit 6 [Source:UniProtKB/Swiss-Prot;Acc:Q6NVF9]
22411	ENSMUST00000165240	-1.66534	0.036614	DOWN	ENSMUSG00000015957	Q059Y4	Wnt11	wingless-type MMTV integration site family, member 11 [Source:MGI Symbol;Acc:MGI:101948]
71340	ENSMUST00000021866	-1.65968	0.00281479	DOWN	ENSMUSG00000021428	Q922Q2	Riok1	RIO kinase 1
78806	ENSMUST00000063707	-1.65513	0.00866259	DOWN	ENSMUSG00000028801	Q9D2F5	Stpg1	O(6)-methylguanine-induced apoptosis 2 [Source:UniProtKB/Swiss-Prot;Acc:Q9D2F5]
20610	ENSMUST00000174295	-1.64454	0.0478846	DOWN	ENSMUSG00000020265	Q9Z172	Sumo3	small ubiquitin-like modifier 3 [Source:MGI Symbol;Acc:MGI:1336201]
14768	ENSMUST00000027149	-1.64399	0.035621	DOWN	ENSMUSG00000026000	O89112	Lancl1	LanC-like protein 1 [Source:UniProtKB/Swiss-Prot;Acc:O89112]
75767	ENSMUST00000211646	-1.64231	0.0121965	DOWN	ENSMUSG00000031488	Q9D620	Rab11fip1	Rab11 family-interacting protein 1 [Source:UniProtKB/Swiss-Prot;Acc:Q9D620]
14229	ENSMUST00000147716	-1.6411	0.0423993	DOWN	ENSMUSG00000024222	Q64378	Fkbp5	Peptidyl-prolyl cis-trans isomerase FKBP5 [Source:UniProtKB/Swiss-Prot;Acc:Q64378]
67888	ENSMUST00000092788	-1.63636	0.0485236	DOWN	ENSMUSG00000069763	Q9CQG9	Tmem100	Transmembrane protein 100 [Source:UniProtKB/Swiss-Prot;Acc:Q9CQG9]
272158	ENSMUST00000042954	-1.63239	0.00858444	DOWN	ENSMUSG00000045102	A0A0R4J0E3	Poln	DNA polymerase N [Source:MGI Symbol;Acc:MGI:2675617]
71724	ENSMUST00000160815	-1.63172	0.00909206	DOWN	ENSMUSG00000064294	Q9CW59	Aox3	Aldehyde oxidase 3 [Source:UniProtKB/Swiss-Prot;Acc:G3X982]
14231	ENSMUST00000147355	-1.63124	0.024453	DOWN	ENSMUSG00000002732	Q3UU11	Fkbp7	Mus musculus FK506 binding protein 7 (Fkbp7), transcript variant 2, mRNA. [Source:RefSeq mRNA;Acc:NM_001355079]
71310	ENSMUST00000142673	-1.6286	0.00723333	DOWN	ENSMUSG00000031709	Q3UYK3	Tbc1d9	TBC1 domain family member 9 [Source:UniProtKB/Swiss-Prot;Acc:Q3UYK3]
103988	ENSMUST00000102920	-1.62725	0.00628876	DOWN	ENSMUSG00000041798	Q5SVI6	Gck	Glucokinase [Source:UniProtKB/Swiss-Prot;Acc:P52792]
17992	ENSMUST00000203801	-1.62237	0.0276822	DOWN	ENSMUSG00000029632	Q62425	Ndufa4	Cytochrome c oxidase subunit NDUFA4 [Source:UniProtKB/Swiss-Prot;Acc:Q62425]
66358	ENSMUST00000146338	-1.62199	0.0304552	DOWN	ENSMUSG00000020910	Q99KS6	Adprm	Manganese-dependent ADP-ribose/CDP-alcohol diphosphatase [Source:UniProtKB/Swiss-Prot;Acc:Q99KS6]
94280	ENSMUST00000062213	-1.61889	0.0237333	DOWN	ENSMUSG00000025212	Q91V61	Sfxn3	sideroflexin 3
208092	ENSMUST00000137055	-1.613	0.0330447	DOWN	ENSMUSG00000025371	P0C0A3	Chmp6	Charged multivesicular body protein 6 [Source:UniProtKB/Swiss-Prot;Acc:P0C0A3]
93716	ENSMUST00000066149	-1.60596	0.0271392	DOWN	ENSMUSG00000103897	Q91XY0	Pcdhga8	protocadherin gamma subfamily A, 8 [Source:MGI Symbol;Acc:MGI:1935221]
93736	ENSMUST00000153821	-1.60334	0.0380469	DOWN	ENSMUSG00000049470	Q9ESC8	Aff4	AF4/FMR2 family member 4 [Source:UniProtKB/Swiss-Prot;Acc:Q9ESC8]
66293	ENSMUST00000144049	-1.6021	0.0272228	DOWN	ENSMUSG00000020812	F2Z424,E9PZV8,Q8C2B7,E9PV55,E9Q255,Q9D8U9	1810032O08Rik	RIKEN cDNA 1810032O08 gene [Source:MGI Symbol;Acc:MGI:1913543]
22791	ENSMUST00000115192	-1.59899	0.037795	DOWN	ENSMUSG00000029014	P54103	Dnajc2	DnaJ homolog subfamily C member 2 [Source:UniProtKB/Swiss-Prot;Acc:P54103]
227937	ENSMUST00000168631	-1.59502	0.022829	DOWN	ENSMUSG00000026991	Q3UIX3	Pkp4	plakophilin 4 [Source:MGI Symbol;Acc:MGI:109281]
66989	ENSMUST00000122163	-1.59257	0.00552238	DOWN	ENSMUSG00000005936	Q8CDD8	Kctd20	Mus musculus potassium channel tetramerisation domain containing 20 (Kctd20), transcript variant 3, mRNA. [Source:RefSeq mRNA;Acc:NM_001356299]
78617	ENSMUST00000129719	-1.59136	0.0242249	DOWN	ENSMUSG00000047363	Q9D245	Cstad	CSA-conditional, T cell activation-dependent protein [Source:MGI Symbol;Acc:MGI:1925867]
71715	ENSMUST00000146797	-1.59027	0.0405464	DOWN	ENSMUSG00000027655	Q8K1G9,A2ACP9,A2ACQ1	Dhx35	probable ATP-dependent RNA helicase DHX35 isoform b [Source:RefSeq peptide;Acc:NP_001278073]
16825	ENSMUST00000136203	-1.58855	0.0382791	DOWN	ENSMUSG00000025223	P70662	Ldb1	LIM domain-binding protein 1 [Source:UniProtKB/Swiss-Prot;Acc:P70662]
53618	ENSMUST00000219289	-1.58791	0.0420909	DOWN	ENSMUSG00000021065	Q9WTS2	Fut8	fucosyltransferase 8
329015	ENSMUST00000045351	-1.58334	0.0335586	DOWN	ENSMUSG00000024773	Q6P4T0	Atg2a	Autophagy-related A [Source:UniProtKB/Swiss-Prot;Acc:Q6P4T0]
68328	ENSMUST00000065418	-1.57464	0.0366283	DOWN	ENSMUSG00000027935	Q9DD03	Rab13	Ras-related protein Rab-13 [Source:UniProtKB/Swiss-Prot;Acc:Q9DD03]
14199	ENSMUST00000114768	-1.57367	0.0270954	DOWN	ENSMUSG00000023092	P97447	Fhl1	Four and a half LIM domains protein 1 [Source:UniProtKB/Swiss-Prot;Acc:P97447]
64660	ENSMUST00000020770	-1.57367	0.0171568	DOWN	ENSMUSG00000020477	Q9CQV5	Mrps24	28S ribosomal protein S24, mitochondrial [Source:UniProtKB/Swiss-Prot;Acc:Q9CQV5]
21926	ENSMUST00000025263	-1.57294	0.0265552	DOWN	ENSMUSG00000024401	Q3U593	Tnf	tumor necrosis factor [Source:MGI Symbol;Acc:MGI:104798]
432508	ENSMUST00000176670	-1.57228	0.0160128	DOWN	ENSMUSG00000055531	Q6NVF9	Cpsf6	Cleavage and polyadenylation specificity factor subunit 6 [Source:UniProtKB/Swiss-Prot;Acc:Q6NVF9]
13000	ENSMUST00000056919	-1.57183	0.0415402	DOWN	ENSMUSG00000046707	Q545V8	Csnk2a2	Casein kinase II subunit alpha' [Source:UniProtKB/Swiss-Prot;Acc:O54833]
73288	ENSMUST00000184461	-1.568	0.000952848	DOWN	ENSMUSG00000001376	Q8CI71	Vps50	VPS50 EARP/GARPII complex subunit [Source:MGI Symbol;Acc:MGI:1920538]
20930	ENSMUST00000142967	-1.56697	0.042139	DOWN	ENSMUSG00000015790	P09925	Surf1	Surfeit locus protein 1 [Source:UniProtKB/Swiss-Prot;Acc:P09925]
232400	ENSMUST00000203291	-1.56499	0.00725229	DOWN	ENSMUSG00000047228	Q3UU35	A2ml1	alpha-2-macroglobulin like 1 [Source:MGI Symbol;Acc:MGI:3039594]
227696	ENSMUST00000139719	-1.55218	0.0250468	DOWN	ENSMUSG00000079484	Q9DB26	Phyhd1	Phytanoyl-CoA dioxygenase domain-containing protein 1 [Source:UniProtKB/Swiss-Prot;Acc:Q9DB26]
69748	ENSMUST00000209963	-1.54633	0.0472878	DOWN	ENSMUSG00000007833	D3Z0B9	Aldh16a1	aldehyde dehydrogenase 16 family, member A1 [Source:MGI Symbol;Acc:MGI:1916998]
106639	ENSMUST00000164907	-1.5456	0.00391157	DOWN	ENSMUSG00000054723	Q8BP01	Vmac	vimentin-type intermediate filament associated coiled-coil protein
20639	ENSMUST00000139114	-1.54482	0.0440044	DOWN	ENSMUSG00000008333	Q9CQI7	Snrpb2	U2 small nuclear ribonucleoprotein B'' [Source:UniProtKB/Swiss-Prot;Acc:Q9CQI7]
235497	ENSMUST00000213767	-1.54425	0.0380629	DOWN	ENSMUSG00000042487	Q5XJE5	Leo1	RNA polymerase-associated protein LEO1 [Source:UniProtKB/Swiss-Prot;Acc:Q5XJE5]
212114	ENSMUST00000198983	-1.54043	0.0020497	DOWN	ENSMUSG00000042997	Q8CCH2	Nhlrc3	NHL repeat containing 3 [Source:MGI Symbol;Acc:MGI:2444520]
15288	ENSMUST00000077353	-1.53783	0.0499696	DOWN	ENSMUSG00000032126	Q3UBC6	Hmbs	Porphobilinogen deaminase [Source:UniProtKB/Swiss-Prot;Acc:P22907]
242960	ENSMUST00000047857	-1.53592	0.0398758	DOWN	ENSMUSG00000039753	Q8C2S5	Fbxl5	F-box/LRR-repeat protein 5 [Source:UniProtKB/Swiss-Prot;Acc:Q8C2S5]
22722	ENSMUST00000109162	-1.53303	0.0156313	DOWN	ENSMUSG00000027551	A2AQR4	Zfp64	zinc finger protein 64 [Source:MGI Symbol;Acc:MGI:107342]
234374	ENSMUST00000008004	-1.52873	0.00328382	DOWN	ENSMUSG00000057788	Q4FZF3	Ddx49	Probable ATP-dependent RNA helicase DDX49 [Source:UniProtKB/Swiss-Prot;Acc:Q4FZF3]
50817	ENSMUST00000212789	-1.5268	0.0300918	DOWN	ENSMUSG00000037326	Q9JLG8	Capn15	Mus musculus calpain 15 (Capn15), transcript variant 1, mRNA. [Source:RefSeq mRNA;Acc:NM_001347334]
70930	ENSMUST00000221328	-1.52403	0.0176018	DOWN	ENSMUSG00000021392	Q3UHX0	Nol8	nucleolar protein 8
233781	ENSMUST00000032892	-1.52353	0.0471382	DOWN	ENSMUSG00000030657	Q811B1	Xylt1	xylosyltransferase 1 [Source:MGI Symbol;Acc:MGI:2451073]
75767	ENSMUST00000210919	-1.51672	0.0328989	DOWN	ENSMUSG00000031488	Q9D620	Rab11fip1	Rab11 family-interacting protein 1 [Source:UniProtKB/Swiss-Prot;Acc:Q9D620]
12048	ENSMUST00000109820	-1.51183	0.00875337	DOWN	ENSMUSG00000007659	Q5HZH3	Bcl2l1	Mus musculus BCL2-like 1 (Bcl2l1), transcript variant 5, mRNA. [Source:RefSeq mRNA;Acc:NM_001355053]
171580	ENSMUST00000123798	-1.5117	0.0281659	DOWN	ENSMUSG00000019823	Q8VDP3	Mical1	Mus musculus microtubule associated monooxygenase, calponin and LIM domain containing 1 (Mical1), transcript variant 4, mRNA. [Source:RefSeq mRNA;Acc:NM_001358839]
73737	ENSMUST00000146423	-1.51062	0.0158338	DOWN	ENSMUSG00000039195	P58686	1110008P14Rik	RIKEN cDNA 1110008P14 gene [Source:MGI Symbol;Acc:MGI:1920987]
244608	ENSMUST00000041569	-1.5097	0.0131488	DOWN	ENSMUSG00000036598	Q8C5T8	Ccdc113	Coiled-coil domain-containing protein 113 [Source:UniProtKB/Swiss-Prot;Acc:Q8C5T8]
211151	ENSMUST00000126408	-1.50663	0.0354088	DOWN	ENSMUSG00000090258	Q6DG52	Churc1	Protein Churchill [Source:UniProtKB/Swiss-Prot;Acc:Q6DG52]
213393	ENSMUST00000067354	-1.50125	0.0149668	DOWN	ENSMUSG00000048489	Q8K2F3	8430408G22Rik	Protein DEPP1 [Source:UniProtKB/Swiss-Prot;Acc:Q8K2F3]
213895	ENSMUST00000205207	-1.50019	0.0131755	DOWN	ENSMUSG00000030138	Q6PGF5	Bms1	BMS1, ribosome biogenesis factor [Source:MGI Symbol;Acc:MGI:2446132]
109305	ENSMUST00000152213	-1.49886	0.029092	DOWN	ENSMUSG00000049686	Q8BWG9	Orai1	ORAI calcium release-activated calcium modulator 1 [Source:MGI Symbol;Acc:MGI:1925542]
330863	ENSMUST00000167588	-1.49816	0.0382454	DOWN	ENSMUSG00000036913	Q8BQ60	Trim67	Tripartite motif-containing protein 67 [Source:UniProtKB/Swiss-Prot;Acc:Q505D9]
67998	ENSMUST00000142733	-1.49301	0.0364113	DOWN	ENSMUSG00000017802	Q9CQV4	Retreg3	Reticulophagy regulator 3 [Source:UniProtKB/Swiss-Prot;Acc:Q9CQV4]
20872	ENSMUST00000131738	-1.49002	0.033209	DOWN	ENSMUSG00000026201	Q8BSV9	Stk16	serine/threonine kinase 16 [Source:MGI Symbol;Acc:MGI:1313271]
15587	ENSMUST00000195667	-1.4899	0.0413346	DOWN	ENSMUSG00000010047	O35632	Hyal2	Hyaluronidase-2 [Source:UniProtKB/Swiss-Prot;Acc:O35632]
194655	ENSMUST00000020982	-1.48763	0.000337844	DOWN	ENSMUSG00000020653	Q8K1S5	Klf11	Krueppel-like factor 11 [Source:UniProtKB/Swiss-Prot;Acc:Q8K1S5]
110460	ENSMUST00000159697	-1.48697	0.0251141	DOWN	ENSMUSG00000023832	Q8CAY6	Acat2	acetyl-Coenzyme A acetyltransferase 2 [Source:MGI Symbol;Acc:MGI:87871]
11689	ENSMUST00000026795	-1.47832	0.0157761	DOWN	ENSMUSG00000025701	P48999	Alox5	Arachidonate 5-lipoxygenase [Source:UniProtKB/Swiss-Prot;Acc:P48999]
21855	ENSMUST00000150541	-1.47708	0.0352549	DOWN	ENSMUSG00000031158	Q9Z0V7	Timm17b	translocase of inner mitochondrial membrane 17b [Source:MGI Symbol;Acc:MGI:1343176]
233651	ENSMUST00000140959	-1.47631	0.018313	DOWN	ENSMUSG00000036862	E9PVD3	Dchs1	Protocadherin-16 [Source:UniProtKB/Swiss-Prot;Acc:E9PVD3]
227613	ENSMUST00000145607	-1.476	0.0432306	DOWN	ENSMUSG00000036752	P68372	Tubb4b	tubulin, beta 4B class IVB [Source:MGI Symbol;Acc:MGI:1915472]
17151	ENSMUST00000099488	-1.47567	0.0130194	DOWN	ENSMUSG00000023572	Q3TVC7	Ccndbp1	Cyclin-D1-binding protein 1 [Source:UniProtKB/Swiss-Prot;Acc:Q3TVC7]
69315	ENSMUST00000022007	-1.47157	0.0354085	DOWN	ENSMUSG00000021534	Q9DAR0	1700001L19Rik	RIKEN cDNA 1700001L19 gene
223864	ENSMUST00000177352	-1.47091	0.0308193	DOWN	ENSMUSG00000022469	Q8VCC8	Rapgef3	Mus musculus Rap guanine nucleotide exchange factor (GEF) 3 (Rapgef3), transcript variant 4, mRNA. [Source:RefSeq mRNA;Acc:NM_001357630]
16885	ENSMUST00000134093	-1.46928	0.0115776	DOWN	ENSMUSG00000029674	P53668	Limk1	LIM domain kinase 1 [Source:UniProtKB/Swiss-Prot;Acc:P53668]
245195	ENSMUST00000065666	-1.46547	0.00469832	DOWN	ENSMUSG00000022651	Q8K426	Retnlg	resistin like gamma
66510	ENSMUST00000133978	-1.46314	0.0316561	DOWN	ENSMUSG00000055850	Q9CY62	Rnf181	Mus musculus ring finger protein 181 (Rnf181), transcript variant 11, mRNA. [Source:RefSeq mRNA;Acc:NM_001331173]
69697	ENSMUST00000171962	-1.46082	0.00235129	DOWN	ENSMUSG00000044433	U5LK19	Camsap3	Calmodulin-regulated spectrin-associated protein 3 [Source:UniProtKB/Swiss-Prot;Acc:Q80VC9]
75497	ENSMUST00000029043	-1.45472	0.0207017	DOWN	ENSMUSG00000027530	Q9DAK4	Fabp12	Fatty acid-binding protein 12 [Source:UniProtKB/Swiss-Prot;Acc:Q9DAK4]
231668	ENSMUST00000128524	-1.45166	0.0316141	DOWN	ENSMUSG00000066894	D3YX43	Vsig10	V-set and immunoglobulin domain containing 10 [Source:MGI Symbol;Acc:MGI:2448533]
98845	ENSMUST00000136736	-1.45073	0.0228866	DOWN	ENSMUSG00000025504	Q99K30	Eps8l2	Epidermal growth factor receptor kinase substrate 8-like protein 2 [Source:UniProtKB/Swiss-Prot;Acc:Q99K30]
96957	ENSMUST00000110686	-1.44932	0.0286615	DOWN	ENSMUSG00000054484	Q8BXJ9	Tmem62	Transmembrane protein 62 [Source:UniProtKB/Swiss-Prot;Acc:Q8BXJ9]
319772	ENSMUST00000052176	-1.44828	0.0172563	DOWN	ENSMUSG00000044092	Q497Y9	C130050O18Rik	RIKEN cDNA C130050O18 gene [Source:MGI Symbol;Acc:MGI:2442694]
80880	ENSMUST00000172649	-1.44732	0.0323844	DOWN	ENSMUSG00000042099	Q9Z1P7	Kank3	Mus musculus KN motif and ankyrin repeat domains 3 (Kank3), transcript variant 2, mRNA. [Source:RefSeq mRNA;Acc:NM_001357162]
100502937	ENSMUST00000080215	-1.44568	0.0498303	DOWN	ENSMUSG00000030930	Q91XQ5	Chst15	predicted gene, 19463
12655	ENSMUST00000063062	-1.4447	0.013009	DOWN	ENSMUSG00000040809	O35744	Chil3	Chitinase-like protein 3 [Source:UniProtKB/Swiss-Prot;Acc:O35744]
14199	ENSMUST00000023854	-1.44362	0.00352072	DOWN	ENSMUSG00000023092	P97447	Fhl1	Four and a half LIM domains protein 1 [Source:UniProtKB/Swiss-Prot;Acc:P97447]
71941	ENSMUST00000049461	-1.44054	0.00860303	DOWN	ENSMUSG00000056228	Q8BYM8	Cars2	cysteinyl-tRNA synthetase 2 (mitochondrial)(putative) [Source:MGI Symbol;Acc:MGI:1919191]
18124	ENSMUST00000030025	-1.4349	0.00748356	DOWN	ENSMUSG00000028341	Q9QZB6	Nr4a3	Nuclear receptor subfamily 4 group A member 3 [Source:UniProtKB/Swiss-Prot;Acc:Q9QZB6]
258216	ENSMUST00000213496	-1.43436	0.0352752	DOWN	ENSMUSG00000102091	A2ATE5	Olfr1034	olfactory receptor 1034
17250	ENSMUST00000146032	-1.43322	0.0462648	DOWN	ENSMUSG00000023088	A5D6P3	Abcc1	ATP-binding cassette, sub-family C (CFTR/MRP), member 1 [Source:MGI Symbol;Acc:MGI:102676]
19416	ENSMUST00000062405	-1.42772	0.0481204	DOWN	ENSMUSG00000049892	O35626	Rasd1	Dexamethasone-induced Ras-related protein 1 [Source:UniProtKB/Swiss-Prot;Acc:O35626]
208583	ENSMUST00000038648	-1.42608	0.00178694	DOWN	ENSMUSG00000035032	Q8C0Q4	Nek11	Serine/threonine-protein kinase Nek11 [Source:UniProtKB/Swiss-Prot;Acc:Q8C0Q4]
70701	ENSMUST00000087212	-1.42166	0.00155859	DOWN	ENSMUSG00000067219	Q8BMW7	Nipal1	Magnesium transporter NIPA3 [Source:UniProtKB/Swiss-Prot;Acc:Q8BMW7]
14766	ENSMUST00000211911	-1.42096	0.0246414	DOWN	ENSMUSG00000031785	Q8K209	Adgrg1	Adhesion G-protein coupled receptor G1 ADGRG1 N-terminal fragment ADGRG1 C-terminal fragment [Source:UniProtKB/Swiss-Prot;Acc:Q8K209]
171167	ENSMUST00000161788	-1.42025	0.0224902	DOWN	ENSMUSG00000046152	Q5F2L2	Fut10	Alpha-(1,3)-fucosyltransferase 10 [Source:UniProtKB/Swiss-Prot;Acc:Q5F2L2]
18082	ENSMUST00000135405	-1.41778	0.0403437	DOWN	ENSMUSG00000034285	Q5SVF7	Nipsnap1	1 [Source:UniProtKB/Swiss-Prot;Acc:O55125]
15894	ENSMUST00000086399	-1.41637	0.0472177	DOWN	ENSMUSG00000037405	P13597	Icam1	intercellular adhesion molecule 1 [Source:MGI Symbol;Acc:MGI:96392]
71340	ENSMUST00000226056	-1.41396	0.0183388	DOWN	ENSMUSG00000021428	Q922Q2	Riok1	RIO kinase 1
12192	ENSMUST00000021552	-1.41149	0.000577992	DOWN	ENSMUSG00000021127	Q543H2	Zfp36l1	zinc finger protein 36, C3H type-like 1
67873	ENSMUST00000127747	-1.41071	0.0240678	DOWN	ENSMUSG00000004996	Q9CQT1	Mri1	Methylthioribose-1-phosphate isomerase [Source:UniProtKB/Swiss-Prot;Acc:Q9CQT1]
11479	ENSMUST00000000544	-1.4093	0.039786	DOWN	ENSMUSG00000000532	Q61271	Acvr1b	Activin receptor type-1B [Source:UniProtKB/Swiss-Prot;Acc:Q61271]
18196	ENSMUST00000202831	-1.40847	0.0476097	DOWN	ENSMUSG00000029126	Q62092	Nsg1	Neuronal vesicle trafficking-associated protein 1 [Source:UniProtKB/Swiss-Prot;Acc:Q62092]
15394	ENSMUST00000000964	-1.4077	0.0485108	DOWN	ENSMUSG00000029844	D3Z4E1	Hoxa1	homeobox A1 [Source:HGNC Symbol;Acc:HGNC:5099]
20361	ENSMUST00000043059	-1.40735	0.000960139	DOWN	ENSMUSG00000038264	Q9QUR8	Sema7a	Semaphorin-7A [Source:UniProtKB/Swiss-Prot;Acc:Q9QUR8]
14199	ENSMUST00000153401	-1.40641	0.00847689	DOWN	ENSMUSG00000023092	P97447	Fhl1	Four and a half LIM domains protein 1 [Source:UniProtKB/Swiss-Prot;Acc:P97447]
74485	ENSMUST00000023846	-1.4049	0.0353761	DOWN	ENSMUSG00000023084	Q9D3W5	Lrrc71	Leucine-rich repeat-containing protein 71 [Source:UniProtKB/Swiss-Prot;Acc:Q9D3W5]
17390	ENSMUST00000211691	-1.40223	0.0059903	DOWN	ENSMUSG00000031740	P33434	Mmp2	72 kDa type IV collagenase PEX [Source:UniProtKB/Swiss-Prot;Acc:P33434]
50868	ENSMUST00000164812	-1.39681	0.00523042	DOWN	ENSMUSG00000003308	Q9Z2X8	Keap1	Kelch-like ECH-associated protein 1 [Source:UniProtKB/Swiss-Prot;Acc:Q9Z2X8]
227736	ENSMUST00000102813	-1.39675	0.0213639	DOWN	ENSMUSG00000038987	Q0VFX2	Cfap157	Cilia- and flagella-associated protein 157 [Source:UniProtKB/Swiss-Prot;Acc:Q0VFX2]
328801	ENSMUST00000170225	-1.39592	0.0376809	DOWN	ENSMUSG00000073423	Q14A93	Zfp414	zinc finger protein 414 [Source:MGI Symbol;Acc:MGI:1915641]
19264	ENSMUST00000185570	-1.39443	0.0305364	DOWN	ENSMUSG00000026395	S4R1S4	Ptprc	protein tyrosine phosphatase, receptor type, C [Source:MGI Symbol;Acc:MGI:97810]
26894	ENSMUST00000112439	-1.39216	0.0106929	DOWN	ENSMUSG00000030127	Q9CZ04	Cops7a	Mus musculus COP9 signalosome subunit 7A (Cops7a), transcript variant 4, mRNA. [Source:RefSeq mRNA;Acc:NM_001355542]
72873	ENSMUST00000081828	-1.39211	0.0101692	DOWN	ENSMUSG00000057265	Q3V079	Bbof1	Basal body-orientation factor 1 [Source:UniProtKB/Swiss-Prot;Acc:Q3V079]
214112	ENSMUST00000020679	-1.3921	0.0269072	DOWN	ENSMUSG00000020411	Q8BZF2	Nipal4	Magnesium transporter NIPA4 [Source:UniProtKB/Swiss-Prot;Acc:Q8BZF2]
76491	ENSMUST00000213179	-1.39043	0.0274448	DOWN	ENSMUSG00000042073	E9QN99	Abhd14b	abhydrolase domain containing 14b [Source:MGI Symbol;Acc:MGI:1923741]
67268	ENSMUST00000024846	-1.38901	0.00921531	DOWN	ENSMUSG00000024048	Q6ZWQ9	Myl12a	myosin, light chain 12A, regulatory, non-sarcomeric
69692	ENSMUST00000160447	-1.38059	0.0200142	DOWN	ENSMUSG00000000295	Q3SXD3	Hddc2	HD domain-containing protein 2 [Source:UniProtKB/Swiss-Prot;Acc:Q3SXD3]
14232	ENSMUST00000128513	-1.37806	0.037074	DOWN	ENSMUSG00000019428	O35465	Fkbp8	Peptidyl-prolyl cis-trans isomerase FKBP8 [Source:UniProtKB/Swiss-Prot;Acc:O35465]
67529	ENSMUST00000067404	-1.37742	0.0156992	DOWN	ENSMUSG00000040242	Q9CRA9	Fgfr1op2	Mus musculus FGFR1 onco partner 2 (Fgfr1op2), transcript variant 2, mRNA. [Source:RefSeq mRNA;Acc:NM_001347513]
104079	ENSMUST00000058866	-1.37645	0.00872887	DOWN	ENSMUSG00000046719	Q544G3	Nxph3	Neurexophilin-3 [Source:UniProtKB/Swiss-Prot;Acc:Q91VX5]
14537	ENSMUST00000174137	-1.37514	0.0457363	DOWN	ENSMUSG00000038843	Q09324	Gcnt1	Beta-1,3-galactosyl-O-glycosyl-glycoprotein beta-1,6-N-acetylglucosaminyltransferase [Source:UniProtKB/Swiss-Prot;Acc:Q09324]
216867	ENSMUST00000094055	-1.37141	0.000999562	DOWN	ENSMUSG00000040938	Q9JJC0	Slc16a11	solute carrier family 16 (monocarboxylic acid transporters), member 11 [Source:MGI Symbol;Acc:MGI:2663709]
55934	ENSMUST00000215715	-1.37032	0.0298683	DOWN	ENSMUSG00000032239	Q3TH81	Rp9	retinitis pigmentosa 9 (human) [Source:MGI Symbol;Acc:MGI:2157166]
384071	ENSMUST00000038661	-1.36926	0.00821826	DOWN	ENSMUSG00000040740	A2ADF7	Slc25a34	Solute carrier family 25 member 34 [Source:UniProtKB/Swiss-Prot;Acc:A2ADF7]
70408	ENSMUST00000136999	-1.3673	0.00461157	DOWN	ENSMUSG00000027427	Q8C108	Polr3f	polymerase (RNA) III (DNA directed) polypeptide F [Source:MGI Symbol;Acc:MGI:1924086]
77569	ENSMUST00000135334	-1.36496	0.0347313	DOWN	ENSMUSG00000037736	Q3UH68	Limch1	LIM and calponin homology domains-containing protein 1 [Source:UniProtKB/Swiss-Prot;Acc:Q3UH68]
74480	ENSMUST00000022386	-1.36442	0.00614502	DOWN	ENSMUSG00000021838	Q8CBY1	Samd4	1 [Source:UniProtKB/Swiss-Prot;Acc:Q8CBY1]
108657	ENSMUST00000179854	-1.36158	0.00679781	DOWN	ENSMUSG00000026269	G5E872	Rnpepl1	Aminopeptidase RNPEPL1 [Source:UniProtKB/Swiss-Prot;Acc:G5E872]
18044	ENSMUST00000159063	-1.36049	0.0413629	DOWN	ENSMUSG00000023994	Q3UP82	Nfya	Mus musculus nuclear transcription factor-Y alpha (Nfya), transcript variant 3, mRNA. [Source:RefSeq mRNA;Acc:NM_001347401]
59029	ENSMUST00000028278	-1.35957	0.047405	DOWN	ENSMUSG00000026914	O35593	Psmd14	26S proteasome non-ATPase regulatory subunit 14 [Source:UniProtKB/Swiss-Prot;Acc:O35593]
70673	ENSMUST00000070313	-1.35886	0.0479671	DOWN	ENSMUSG00000039410	A2A935	Prdm16	PR domain zinc finger protein 16 [Source:UniProtKB/Swiss-Prot;Acc:A2A935]
17394	ENSMUST00000018765	-1.35261	0.0042312	DOWN	ENSMUSG00000005800	O70138	Mmp8	Neutrophil collagenase [Source:UniProtKB/Swiss-Prot;Acc:O70138]
13586	ENSMUST00000179200	-1.34767	0.0302997	DOWN	ENSMUSG00000072601	P97426	Ear1	Eosinophil cationic protein 1 [Source:UniProtKB/Swiss-Prot;Acc:P97426]
67010	ENSMUST00000213525	-1.34457	0.0177284	DOWN	ENSMUSG00000042396	Q9CQT2	Rbm7	RNA binding motif protein 7 [Source:MGI Symbol;Acc:MGI:1914260]
15951	ENSMUST00000111214	-1.34391	0.00276452	DOWN	ENSMUSG00000073489	P15092	Ifi204	Interferon-activable protein 204 [Source:UniProtKB/Swiss-Prot;Acc:P0DOV2]
231858	ENSMUST00000139824	-1.3434	0.0452652	DOWN	ENSMUSG00000029576	Q69Z89	Radil	Ras-associating and dilute domain-containing protein [Source:UniProtKB/Swiss-Prot;Acc:Q69Z89]
11522	ENSMUST00000161799	-1.34088	0.00411161	DOWN	ENSMUSG00000074207	P00329	Adh1	Alcohol dehydrogenase 1 [Source:UniProtKB/Swiss-Prot;Acc:P00329]
94184	ENSMUST00000115804	-1.34031	0.00495228	DOWN	ENSMUSG00000022680	Q99K01	Pdxdc1	pyridoxal-dependent decarboxylase domain containing 1 [Source:MGI Symbol;Acc:MGI:1920909]
58248	ENSMUST00000038539	-1.34027	0.0412208	DOWN	ENSMUSG00000040822	Q9JJ93	1700123O20Rik	RIKEN cDNA 1700123O20 gene
414801	ENSMUST00000160247	-1.33839	0.0219471	DOWN	ENSMUSG00000044948	Q3TNL8	Cfap43	inositol 1,4,5-triphosphate receptor interacting protein
98386	ENSMUST00000192075	-1.33792	0.0334113	DOWN	ENSMUSG00000004880	Q3U9G9	Lbr	Lamin-B receptor [Source:UniProtKB/Swiss-Prot;Acc:Q3U9G9]
72973	ENSMUST00000093939	-1.33617	0.0225879	DOWN	ENSMUSG00000070336	A2A6H3	Fbxo47	F-box only protein 47 [Source:UniProtKB/Swiss-Prot;Acc:A2A6H3]
68718	ENSMUST00000014614	-1.33528	0.0181072	DOWN	ENSMUSG00000014470	A2RS02	Rnf166	ring finger protein 166 [Source:MGI Symbol;Acc:MGI:1915968]
14467	ENSMUST00000086046	-1.3328	0.0194398	DOWN	ENSMUSG00000029432	Q7TMG8	Nipsnap2	nipsnap homolog 2 [Source:HGNC Symbol;Acc:HGNC:4179]
56209	ENSMUST00000038791	-1.33013	0.0226342	DOWN	ENSMUSG00000033917	Q9JL56	Gde1	Glycerophosphodiester phosphodiesterase 1 [Source:UniProtKB/Swiss-Prot;Acc:Q9JL56]
52521	ENSMUST00000227093	-1.32807	0.0234788	DOWN	ENSMUSG00000052253	Q91VY9	Zfp622	zinc finger protein 622
11565	ENSMUST00000021726	-1.32664	0.00639561	DOWN	ENSMUSG00000011148	P28650	Adssl1	adenylosuccinate synthetase like 1
18674	ENSMUST00000171960	-1.3247	0.040782	DOWN	ENSMUSG00000061904	Q8VEM8	Slc25a3	solute carrier family 25 (mitochondrial carrier, phosphate carrier), member 3 [Source:MGI Symbol;Acc:MGI:1353498]
228775	ENSMUST00000040312	-1.32461	0.0296261	DOWN	ENSMUSG00000032715	Q8K4K2	Trib3	Tribbles homolog 3 [Source:UniProtKB/Swiss-Prot;Acc:Q8K4K2]
108954	ENSMUST00000122956	-1.32198	0.0423555	DOWN	ENSMUSG00000046062	Q8BFW3	Ppp1r15b	Protein phosphatase 1 regulatory subunit 15B [Source:UniProtKB/Swiss-Prot;Acc:Q8BFW3]
98910	ENSMUST00000114937	-1.31939	0.0189757	DOWN	ENSMUSG00000039046	Q80XC3	Usp6nl	USP6 N-terminal like [Source:MGI Symbol;Acc:MGI:2138893]
15976	ENSMUST00000134491	-1.31791	0.0464393	DOWN	ENSMUSG00000022971	O35664	Ifnar2	interferon (alpha and beta) receptor 2 [Source:MGI Symbol;Acc:MGI:1098243]
101700	ENSMUST00000209654	-1.31458	0.0371213	DOWN	ENSMUSG00000073968	G3X9I6,Q8K243,A0A1B0GSL9	Trim68	tripartite motif-containing 68 [Source:MGI Symbol;Acc:MGI:2142077]
170757	ENSMUST00000141038	-1.31415	0.0365298	DOWN	ENSMUSG00000039167	Q923X1	Adgrl4	Adhesion G protein-coupled receptor L4 [Source:UniProtKB/Swiss-Prot;Acc:Q923X1]
20016	ENSMUST00000174392	-1.31381	0.0111206	DOWN	ENSMUSG00000067148	P52432	Polr1c	DNA-directed RNA polymerases I and III subunit RPAC1 [Source:UniProtKB/Swiss-Prot;Acc:P52432]
71584	ENSMUST00000156336	-1.31358	0.0381253	DOWN	ENSMUSG00000019359	Q9ESM6	Gdpd2	Mus musculus glycerophosphodiester phosphodiesterase domain containing 2 (Gdpd2), transcript variant 3, mRNA. [Source:RefSeq mRNA;Acc:NM_001358507]
210126	ENSMUST00000078988	-1.31173	0.0439485	DOWN	ENSMUSG00000033306	Q8BFW7	Lpp	LIM domain containing preferred translocation partner in lipoma
19009	ENSMUST00000073837	-1.30981	0.0177938	DOWN	ENSMUSG00000009739	Q5U4D4	Pou6f1	POU domain, class 6, transcription factor 1 [Source:MGI Symbol;Acc:MGI:102935]
239570	ENSMUST00000146088	-1.30951	0.00162926	DOWN	ENSMUSG00000035944	A3KMP2	Ttc38	tetratricopeptide repeat domain 38 [Source:MGI Symbol;Acc:MGI:2146198]
24067	ENSMUST00000221479	-1.30887	0.0157137	DOWN	ENSMUSG00000073079	P14576	Srp54	signal recognition particle 54A
16898	ENSMUST00000129984	-1.30628	0.0198938	DOWN	ENSMUSG00000044533	Q58EU3	Rps2	ribosomal protein S2 [Source:MGI Symbol;Acc:MGI:105110]
320299	ENSMUST00000114819	-1.30355	0.00947283	DOWN	ENSMUSG00000022837	Q8BP00	Iqcb1	IQ calmodulin-binding motif-containing protein 1 [Source:UniProtKB/Swiss-Prot;Acc:Q8BP00]
114332	ENSMUST00000033050	-1.30229	0.00142817	DOWN	ENSMUSG00000030787	Q8BHC0	Lyve1	Lymphatic vessel endothelial hyaluronic acid receptor 1 [Source:UniProtKB/Swiss-Prot;Acc:Q8BHC0]
258783	ENSMUST00000074740	-1.30227	0.0160341	DOWN	ENSMUSG00000061039	E9Q413	Olfr920	olfactory receptor 920
24110	ENSMUST00000204926	-1.30206	0.0310621	DOWN	ENSMUSG00000030107	Q9WTV6	Usp18	ubiquitin specific peptidase 18 [Source:MGI Symbol;Acc:MGI:1344364]
231571	ENSMUST00000112651	-1.3003	0.0380687	DOWN	ENSMUSG00000033773	Q8VC34	Rpap2	Putative RNA polymerase II subunit B1 CTD phosphatase Rpap2 [Source:UniProtKB/Swiss-Prot;Acc:Q8VC34]
56739	ENSMUST00000002395	-1.29316	0.00658781	DOWN	ENSMUSG00000002324	Q8C5S7	Rec8	Meiotic recombination [Source:UniProtKB/Swiss-Prot;Acc:Q8C5S7]
66078	ENSMUST00000108627	-1.29134	0.0307159	DOWN	ENSMUSG00000035585	Q8BMZ5	Tsen34	tRNA-splicing endonuclease subunit Sen34 [Source:UniProtKB/Swiss-Prot;Acc:Q8BMZ5]
64381	ENSMUST00000025636	-1.28833	0.0137167	DOWN	ENSMUSG00000024730	Q99N10	Ms4a8a	Membrane-spanning 4-domains subfamily A member 8 [Source:UniProtKB/Swiss-Prot;Acc:Q99N10]
16948	ENSMUST00000025409	-1.28669	0.0453893	DOWN	ENSMUSG00000024529	Q3TP83	Lox	lysyl oxidase
12258	ENSMUST00000111641	-1.2865	0.0140177	DOWN	ENSMUSG00000023224	P97290	Serping1	serine (or cysteine) peptidase inhibitor, clade G, member 1 [Source:MGI Symbol;Acc:MGI:894696]
14694	ENSMUST00000142269	-1.28287	0.0040268	DOWN	ENSMUSG00000020372	P68040	Rack1	Receptor of activated protein C kinase 1 Receptor of activated protein C kinase 1, N-terminally processed [Source:UniProtKB/Swiss-Prot;Acc:P68040]
30839	ENSMUST00000142004	-1.28121	0.0456871	DOWN	ENSMUSG00000015095	Q9QXW2	Fbxw5	Mus musculus F-box and WD-40 domain protein 5 (Fbxw5), transcript variant 3, mRNA. [Source:RefSeq mRNA;Acc:NM_001356408]
320292	ENSMUST00000031276	-1.27536	0.0218194	DOWN	ENSMUSG00000089809	Q8JZL7	Rasgef1b	Ras-GEF domain-containing family member 1B [Source:UniProtKB/Swiss-Prot;Acc:Q8JZL7]
71724	ENSMUST00000159014	-1.27413	0.00415454	DOWN	ENSMUSG00000064294	Q9CW59	Aox3	Aldehyde oxidase 3 [Source:UniProtKB/Swiss-Prot;Acc:G3X982]
100504491	ENSMUST00000106037	-1.27388	0.0205088	DOWN	ENSMUSG00000078552	J3KML0	Dcdc2b	doublecortin domain containing 2B [Source:HGNC Symbol;Acc:HGNC:32576]
12490	ENSMUST00000016638	-1.26752	0.0138791	DOWN	ENSMUSG00000016494	Q543Y2	Cd34	Hematopoietic progenitor cell antigen CD34 [Source:UniProtKB/Swiss-Prot;Acc:Q64314]
16418	ENSMUST00000109638	-1.26734	0.0105818	DOWN	ENSMUSG00000027613	O55135	Eif6	Eukaryotic translation initiation factor 6 [Source:UniProtKB/Swiss-Prot;Acc:O55135]
109075	ENSMUST00000059045	-1.26594	0.0355582	DOWN	ENSMUSG00000034259	Q921I9	Exosc4	Exosome complex component RRP41 [Source:UniProtKB/Swiss-Prot;Acc:Q921I9]
19724	ENSMUST00000210660	-1.26562	0.00871448	DOWN	ENSMUSG00000031706	P48377	Rfx1	MHC class II regulatory factor RFX1 [Source:UniProtKB/Swiss-Prot;Acc:P48377]
232798	ENSMUST00000037472	-1.26547	0.0354959	DOWN	ENSMUSG00000035545	Q8CBY3	Leng8	Leukocyte receptor cluster member 8 homolog [Source:UniProtKB/Swiss-Prot;Acc:Q8CBY3]
234366	ENSMUST00000177851	-1.26487	0.0147459	DOWN	ENSMUSG00000036180	Q8CHY6	Gatad2a	Transcriptional repressor p66 alpha [Source:UniProtKB/Swiss-Prot;Acc:Q8CHY6]
68922	ENSMUST00000102963	-1.26393	0.01113	DOWN	ENSMUSG00000061322	Q8C0M8	Dnaic1	Dynein intermediate chain 1, axonemal [Source:UniProtKB/Swiss-Prot;Acc:Q8C0M8]
68080	ENSMUST00000127608	-1.26307	0.0480686	DOWN	ENSMUSG00000029464	Q9D3W4	Gpn3	GPN-loop GTPase 3 [Source:MGI Symbol;Acc:MGI:1289326]
18054	ENSMUST00000035061	-1.26156	0.047736	DOWN	ENSMUSG00000032484	O08692	Ngp	Neutrophilic granule protein [Source:UniProtKB/Swiss-Prot;Acc:O08692]
18227	ENSMUST00000140165	-1.25951	0.0245821	DOWN	ENSMUSG00000026826	Q3TYI4	Nr4a2	Nuclear receptor subfamily 4 group A member 2 [Source:UniProtKB/Swiss-Prot;Acc:Q06219]
108089	ENSMUST00000222505	-1.25674	0.0302214	DOWN	ENSMUSG00000020642	Q925F3	Rnf144a	ring finger protein 144A
22228	ENSMUST00000149808	-1.25547	0.0385735	DOWN	ENSMUSG00000033685	Q549J5	Ucp2	uncoupling protein 2 (mitochondrial, proton carrier) [Source:MGI Symbol;Acc:MGI:109354]
380694	ENSMUST00000050574	-1.2537	0.0205921	DOWN	ENSMUSG00000044707	Q5SRT8	Ccnjl	Cyclin-J-like protein [Source:UniProtKB/Swiss-Prot;Acc:Q5SRT8]
66980	ENSMUST00000223625	-1.25343	0.0173181	DOWN	ENSMUSG00000024982	Q9CPV7	Zdhhc6	zinc finger, DHHC domain containing 6
11486	ENSMUST00000017841	-1.24998	0.0141697	DOWN	ENSMUSG00000017697	Q4FK28	Ada	Adenosine deaminase [Source:UniProtKB/Swiss-Prot;Acc:P03958]
72054	ENSMUST00000003574	-1.24774	0.00869327	DOWN	ENSMUSG00000003484	Q99N16	Cyp4f18	Leukotriene-B(4) omega-hydroxylase 2 [Source:UniProtKB/Swiss-Prot;Acc:Q99N16]
66202	ENSMUST00000035154	-1.24392	0.0457735	DOWN	ENSMUSG00000032551	Q8K039	1110059G10Rik	RIKEN cDNA 1110059G10 gene [Source:MGI Symbol;Acc:MGI:1913452]
230596	ENSMUST00000132951	-1.24339	0.0220018	DOWN	ENSMUSG00000063800	Q4FK66	Prpf38a	PRP38 pre-mRNA processing factor 38 (yeast) domain containing A [Source:MGI Symbol;Acc:MGI:1916962]
239318	ENSMUST00000130332	-1.24103	0.0158943	DOWN	ENSMUSG00000049148	G3X9A7	Plcxd3	phosphatidylinositol-specific phospholipase C, X domain containing 3 [Source:MGI Symbol;Acc:MGI:2442605]
14894	ENSMUST00000212731	-1.24056	0.0201924	DOWN	ENSMUSG00000031796	Q8BTU1	Cfap20	Cilia- and flagella-associated protein 20 [Source:UniProtKB/Swiss-Prot;Acc:Q8BTU1]
229055	ENSMUST00000155203	-1.24009	0.02164	DOWN	ENSMUSG00000069114	Q8BNK5	Zbtb10	zinc finger and BTB domain containing 10 [Source:HGNC Symbol;Acc:HGNC:30953]
59083	ENSMUST00000023587	-1.23935	0.0263117	DOWN	ENSMUSG00000022871	Q9QXC1	Fetub	fetuin beta
68744	ENSMUST00000141465	-1.23865	0.0385946	DOWN	ENSMUSG00000046897	Q6NZQ6	Zfp740	zinc finger protein 740 [Source:MGI Symbol;Acc:MGI:1915994]
12821	ENSMUST00000026045	-1.23708	0.00580494	DOWN	ENSMUSG00000025064	Q07563	Col17a1	Collagen alpha-1(XVII) chain 120 kDa linear IgA disease antigen homolog [Source:UniProtKB/Swiss-Prot;Acc:Q07563]
71838	ENSMUST00000228140	-1.23705	0.0323203	DOWN	ENSMUSG00000021902	A2RTI5	Phf7	PHD finger protein 7
75137	ENSMUST00000197449	-1.23647	0.0274321	DOWN	ENSMUSG00000028106	Q6NXI6	Rprd2	regulation of nuclear pre-mRNA domain containing 2 [Source:MGI Symbol;Acc:MGI:1922387]
56615	ENSMUST00000120230	-1.2349	0.0474827	DOWN	ENSMUSG00000008540	Q91VS7	Mgst1	Microsomal glutathione S-transferase 1 [Source:UniProtKB/Swiss-Prot;Acc:Q91VS7]
14683	ENSMUST00000129534	-1.23169	0.0127194	DOWN	ENSMUSG00000027523	P63094	Gnas	GNAS (guanine nucleotide binding protein, alpha stimulating) complex locus [Source:MGI Symbol;Acc:MGI:95777]
16438	ENSMUST00000203530	-1.22749	0.0169937	DOWN	ENSMUSG00000030102	Q8C8N0	Itpr1	Inositol 1,4,5-trisphosphate receptor type 1 [Source:UniProtKB/Swiss-Prot;Acc:P11881]
70807	ENSMUST00000212898	-1.2264	0.0118325	DOWN	ENSMUSG00000002910	Q9D668	Arrdc2	Arrestin domain-containing protein 2 [Source:UniProtKB/Swiss-Prot;Acc:Q9D668]
64177	ENSMUST00000031902	-1.22624	0.0107338	DOWN	ENSMUSG00000029868	Q91WD2	Trpv6	transient receptor potential cation channel, subfamily V, member 6 [Source:MGI Symbol;Acc:MGI:1927259]
14782	ENSMUST00000033992	-1.22588	0.00586943	DOWN	ENSMUSG00000031584	P47791	Gsr	Glutathione reductase, mitochondrial [Source:UniProtKB/Swiss-Prot;Acc:P47791]
225994	ENSMUST00000162446	-1.22541	0.0139178	DOWN	ENSMUSG00000037847	Q91W63	Nmrk1	Nicotinamide riboside kinase 1 [Source:UniProtKB/Swiss-Prot;Acc:Q91W63]
19893	ENSMUST00000124744	-1.22519	0.0329115	DOWN	ENSMUSG00000031174	A2ADP2	Rpgr	retinitis pigmentosa GTPase regulator [Source:MGI Symbol;Acc:MGI:1344037]
69666	ENSMUST00000147632	-1.22415	0.0438129	DOWN	ENSMUSG00000071451	P0C7N9	Psmg4	Proteasome assembly chaperone 4 [Source:UniProtKB/Swiss-Prot;Acc:P0C7N9]
69047	ENSMUST00000095171	-1.22039	0.0287069	DOWN	ENSMUSG00000034112	A7L9Z8	Atp2c2	Calcium-transporting ATPase type 2C member 2 [Source:UniProtKB/Swiss-Prot;Acc:A7L9Z8]
338359	ENSMUST00000159042	-1.22014	0.0389958	DOWN	ENSMUSG00000020079	Q80YD1	Supv3l1	ATP-dependent RNA helicase SUPV3L1, mitochondrial [Source:UniProtKB/Swiss-Prot;Acc:Q80YD1]
215303	ENSMUST00000016323	-1.2199	0.00321101	DOWN	ENSMUSG00000016179	Q91VB2	Camk1g	Calcium/calmodulin-dependent protein kinase type 1G [Source:UniProtKB/Swiss-Prot;Acc:Q91VB2]
223267	ENSMUST00000038075	-1.21914	0.00732193	DOWN	ENSMUSG00000041625	Q923B0	Ggact	Gamma-glutamylaminecyclotransferase [Source:UniProtKB/Swiss-Prot;Acc:Q923B0]
230917	ENSMUST00000139923	-1.2179	0.0386532	DOWN	ENSMUSG00000044700	A2A8U2	Tmem201	Transmembrane protein 201 [Source:UniProtKB/Swiss-Prot;Acc:A2A8U2]
52206	ENSMUST00000031072	-1.21536	0.0216547	DOWN	ENSMUSG00000029176	Q91W96	Anapc4	Anaphase-promoting complex subunit 4 [Source:UniProtKB/Swiss-Prot;Acc:Q91W96]
20201	ENSMUST00000198156	-1.21457	0.0330648	DOWN	ENSMUSG00000056054	Q53X15	S100a8	S100 calcium binding protein A8 (calgranulin A) [Source:MGI Symbol;Acc:MGI:88244]
72542	ENSMUST00000112505	-1.21398	0.00830144	DOWN	ENSMUSG00000029500	Q8BX10	Pgam5	Serine/threonine-protein phosphatase PGAM5, mitochondrial [Source:UniProtKB/Swiss-Prot;Acc:Q8BX10]
20300	ENSMUST00000098949	-1.21312	0.0281686	DOWN	ENSMUSG00000023235	O35903	Ccl25	C-C motif chemokine 25 [Source:UniProtKB/Swiss-Prot;Acc:O35903]
228765	ENSMUST00000028950	-1.20933	0.0331102	DOWN	ENSMUSG00000027456	Q3UN51	Sdcbp2	Syntenin-2 [Source:UniProtKB/Swiss-Prot;Acc:Q99JZ0]
14385	ENSMUST00000215420	-1.20633	0.0197174	DOWN	ENSMUSG00000032114	Q9D1F9	Slc37a4	glucose-6-phosphate exchanger SLC37A4 isoform a [Source:RefSeq peptide;Acc:NP_001344659]
66058	ENSMUST00000203461	-1.20385	0.0144606	DOWN	ENSMUSG00000023367	Q9DCS1	Tmem176a	Transmembrane protein 176A [Source:UniProtKB/Swiss-Prot;Acc:Q9DCS1]
229707	ENSMUST00000064759	-1.20033	0.040976	DOWN	ENSMUSG00000014601	Q3UGC1	Strip1	Striatin-interacting protein 1 [Source:UniProtKB/Swiss-Prot;Acc:Q8C079]
75541	ENSMUST00000095757	-1.19969	0.00457343	DOWN	ENSMUSG00000068299	E0CYM0	Nat8f4	N-acetyltransferase 8 (GCN5-related) family member 4
51796	ENSMUST00000150619	-1.19927	0.0498944	DOWN	ENSMUSG00000028809	E9PUK6	Srrm1	serine and arginine repetitive matrix 1 [Source:HGNC Symbol;Acc:HGNC:16638]
15929	ENSMUST00000142707	-1.19752	0.0451297	DOWN	ENSMUSG00000002010	P70404	Idh3g	isocitrate dehydrogenase 3 (NAD+), gamma [Source:MGI Symbol;Acc:MGI:1099463]
17748	ENSMUST00000034215	-1.19641	0.0033664	DOWN	ENSMUSG00000031765	P02802	Mt1	Metallothionein-1 [Source:UniProtKB/Swiss-Prot;Acc:P02802]
50877	ENSMUST00000036331	-1.19576	0.0109775	DOWN	ENSMUSG00000035239	Q9JMH7	Neu3	neuraminidase 3 [Source:MGI Symbol;Acc:MGI:1355305]
69821	ENSMUST00000152307	-1.19437	0.00923782	DOWN	ENSMUSG00000026273	Q8BVN4	Mterf4	Transcription termination factor 4, mitochondrial [Source:UniProtKB/Swiss-Prot;Acc:Q8BVN4]
73389	ENSMUST00000175686	-1.193	0.0128272	DOWN	ENSMUSG00000002996	Q8R316	Hbp1	HMG-box transcription factor 1 [Source:HGNC Symbol;Acc:HGNC:23200]
20515	ENSMUST00000140907	-1.18994	0.0245349	DOWN	ENSMUSG00000027397	Q61609	Slc20a1	Sodium-dependent phosphate transporter 1 [Source:UniProtKB/Swiss-Prot;Acc:Q61609]
101543	ENSMUST00000123813	-1.18938	0.0409978	DOWN	ENSMUSG00000036459	Q7TQJ8	Wtip	WT1-interacting protein [Source:MGI Symbol;Acc:MGI:2141920]
381107	ENSMUST00000062161	-1.18454	0.0210977	DOWN	ENSMUSG00000045036	Q5K6N0	Tmem232	transmembrane protein 232
353156	ENSMUST00000100290	-1.18406	0.0463998	DOWN	ENSMUSG00000026921	Q9QXT5	Egfl7	EGF like domain multiple 7 [Source:HGNC Symbol;Acc:HGNC:20594]
21423	ENSMUST00000020379	-1.18325	0.0280813	DOWN	ENSMUSG00000020167	P15806	Tcf3	Transcription factor E2-alpha [Source:UniProtKB/Swiss-Prot;Acc:P15806]
17299	ENSMUST00000006915	-1.18256	0.0134944	DOWN	ENSMUSG00000006732	Q9Z120	Mettl1	tRNA (guanine-N(7)-)-methyltransferase [Source:UniProtKB/Swiss-Prot;Acc:Q9Z120]
407795	ENSMUST00000098713	-1.18128	0.0209907	DOWN	ENSMUSG00000074300	-	BC030870	cDNA sequence BC030870 [Source:MGI Symbol;Acc:MGI:3039572]
57438	ENSMUST00000102748	-1.17999	0.00343926	DOWN	ENSMUSG00000026977	Q9WV66	March7	E3 ubiquitin-protein ligase MARCH7 [Source:UniProtKB/Swiss-Prot;Acc:Q9WV66]
12946	ENSMUST00000194111	-1.17645	0.0147723	DOWN	ENSMUSG00000016481	Q64735	Cr1l	Mus musculus complement component (3b/4b) receptor 1-like (Cr1l), transcript variant 2, mRNA. [Source:RefSeq mRNA;Acc:NM_001355060]
233552	ENSMUST00000208061	-1.17438	0.0159407	DOWN	ENSMUSG00000035314	Q640M6	Gdpd5	Glycerophosphodiester phosphodiesterase domain-containing protein 5 [Source:UniProtKB/Swiss-Prot;Acc:Q640M6]
68970	ENSMUST00000030145	-1.17411	0.00364701	DOWN	ENSMUSG00000028436	Q8BGZ3	Dcaf12	DDB1- and CUL4-associated factor 12 [Source:UniProtKB/Swiss-Prot;Acc:Q8BGZ3]
224813	ENSMUST00000095262	-1.17313	0.0309993	DOWN	ENSMUSG00000071073	B2RWC4	Lrrc73	leucine rich repeat containing 73
21859	ENSMUST00000136045	-1.1723	0.0420905	DOWN	ENSMUSG00000020044	P39876	Timp3	tissue inhibitor of metalloproteinase 3 [Source:MGI Symbol;Acc:MGI:98754]
102103	ENSMUST00000155174	-1.17193	0.0109715	DOWN	ENSMUSG00000045636	A0A0R4J1L9	Mtus1	mitochondrial tumor suppressor 1 [Source:MGI Symbol;Acc:MGI:2142572]
18104	ENSMUST00000003947	-1.17072	0.0138928	DOWN	ENSMUSG00000003849	Q64669	Nqo1	NAD(P)H dehydrogenase [quinone] 1 [Source:UniProtKB/Swiss-Prot;Acc:Q64669]
12617	ENSMUST00000198059	-1.16662	0.0362619	DOWN	ENSMUSG00000029253	P49452	Cenpc1	Centromere protein C [Source:UniProtKB/Swiss-Prot;Acc:P49452]
227700	ENSMUST00000028214	-1.16284	0.0265268	DOWN	ENSMUSG00000026860	B0LDS3	Sh3glb2	SH3-domain GRB2-like endophilin B2 [Source:MGI Symbol;Acc:MGI:2385131]
11641	ENSMUST00000102902	-1.16056	0.0349849	DOWN	ENSMUSG00000038729	O54931	Akap2	A-kinase anchor protein 2 [Source:UniProtKB/Swiss-Prot;Acc:O54931]
171210	ENSMUST00000021649	-1.15838	0.00433273	DOWN	ENSMUSG00000021226	Q9QYR9	Acot2	acyl-CoA thioesterase 2 [Source:MGI Symbol;Acc:MGI:2159605]
22413	ENSMUST00000010941	-1.15796	0.0207572	DOWN	ENSMUSG00000010797	Q8BRC7	Wnt2	wingless-type MMTV integration site family, member 2 [Source:MGI Symbol;Acc:MGI:98954]
59014	ENSMUST00000072079	-1.15677	0.0253409	DOWN	ENSMUSG00000061024	Q9CYH6	Rrs1	Ribosome biosis regulatory protein homolog [Source:UniProtKB/Swiss-Prot;Acc:Q9CYH6]
67657	ENSMUST00000128036	-1.15645	0.0202772	DOWN	ENSMUSG00000022827	Q9D4V7	Rabl3	Rab-like protein 3 [Source:UniProtKB/Swiss-Prot;Acc:Q9D4V7]
93732	ENSMUST00000164598	-1.15645	0.00376695	DOWN	ENSMUSG00000021751	Q9QXD1	Acox2	Peroxisomal acyl-coenzyme A oxidase 2 [Source:UniProtKB/Swiss-Prot;Acc:Q9QXD1]
241158	ENSMUST00000212504	-1.1563	0.0157493	DOWN	ENSMUSG00000034212	E9PUG3	Ankmy1	Mus musculus ankyrin repeat and MYND domain containing 1 (Ankmy1), transcript variant 2, mRNA. [Source:RefSeq mRNA;Acc:NM_001347091]
64451	ENSMUST00000160048	-1.15606	0.0288348	DOWN	ENSMUSG00000020231	F8WI56	Dip2a	Disco-interacting A [Source:UniProtKB/Swiss-Prot;Acc:Q8BWT5]
68528	ENSMUST00000132961	-1.15374	0.0211101	DOWN	ENSMUSG00000075420	Q3U0I6	Smim6	small integral membrane protein 6
66596	ENSMUST00000133296	-1.15009	0.0177351	DOWN	ENSMUSG00000016503	Q8VHT7	Gtf3a	transcription factor IIIA [Source:RefSeq peptide;Acc:NP_079928]
58180	ENSMUST00000090190	-1.14975	0.00761019	DOWN	ENSMUSG00000050240	Q9JLZ6	Hic2	Hypermethylated in cancer 2 protein [Source:UniProtKB/Swiss-Prot;Acc:Q9JLZ6]
217480	ENSMUST00000040500	-1.14949	0.0246223	DOWN	ENSMUSG00000036095	Q6NS52	Dgkb	diacylglycerol kinase, beta
17975	ENSMUST00000185676	-1.14816	0.0431906	DOWN	ENSMUSG00000026234	P09405	Ncl	Nucleolin [Source:UniProtKB/Swiss-Prot;Acc:P09405]
14226	ENSMUST00000020964	-1.14723	0.0233457	DOWN	ENSMUSG00000020635	Q9Z2I2	Fkbp1b	FK506 binding protein 1b
70285	ENSMUST00000199079	-1.14587	0.0386206	DOWN	ENSMUSG00000028187	Q7TND5	Rpf1	ribosome production factor 1 homolog [Source:MGI Symbol;Acc:MGI:1917535]
216760	ENSMUST00000128971	-1.14537	0.0158016	DOWN	ENSMUSG00000020522	A0A0R4J1C7	Mfap3	microfibril associated protein 3 [Source:HGNC Symbol;Acc:HGNC:7034]
69215	ENSMUST00000108656	-1.14489	0.0164017	DOWN	ENSMUSG00000069835	Q6P8J2	Sat2	Mus musculus spermidine/spermine N1-acetyl transferase 2 (Sat2), transcript variant 2, mRNA. [Source:RefSeq mRNA;Acc:NM_001356468]
22099	ENSMUST00000186608	-1.14487	0.0419738	DOWN	ENSMUSG00000026374	Q545E6	Tsn	translin [Source:MGI Symbol;Acc:MGI:109263]
67223	ENSMUST00000162336	-1.14357	0.0246044	DOWN	ENSMUSG00000001305	Q9CYX7	Rrp15	RRP15-like protein [Source:UniProtKB/Swiss-Prot;Acc:Q9CYX7]
18081	ENSMUST00000049022	-1.14297	0.0247471	DOWN	ENSMUSG00000037966	Q3TXT8	Ninj1	ninjurin 1 [Source:MGI Symbol;Acc:MGI:1196617]
235627	ENSMUST00000167320	-1.14268	0.0312319	DOWN	ENSMUSG00000056724	E9Q9L6	Nbeal2	Neurobeachin-like protein 2 [Source:UniProtKB/Swiss-Prot;Acc:Q6ZQA0]
107976	ENSMUST00000201592	-1.14147	0.0251618	DOWN	ENSMUSG00000052139	Q8K3W0	Babam2	BRISC and BRCA1-A complex member 2 [Source:UniProtKB/Swiss-Prot;Acc:Q8K3W0]
80861	ENSMUST00000017974	-1.14022	0.0224646	DOWN	ENSMUSG00000017830	Q99J87	Dhx58	Probable ATP-dependent RNA helicase DHX58 [Source:UniProtKB/Swiss-Prot;Acc:Q99J87]
17764	ENSMUST00000147452	-1.13957	0.0458325	DOWN	ENSMUSG00000028890	Q07243	Mtf1	Metal regulatory transcription factor 1 [Source:UniProtKB/Swiss-Prot;Acc:Q07243]
67282	ENSMUST00000020248	-1.13805	0.0162317	DOWN	ENSMUSG00000020056	Q9CR27	Washc3	WASH complex subunit 3 [Source:MGI Symbol;Acc:MGI:1914532]
108037	ENSMUST00000026470	-1.13775	0.0172527	DOWN	ENSMUSG00000025403	Q3TFD0	Shmt2	serine hydroxymethyltransferase 2 (mitochondrial)
76846	ENSMUST00000126562	-1.13594	0.0172824	DOWN	ENSMUSG00000006333	Q6ZWN5	Rps9	40S ribosomal protein S9 [Source:UniProtKB/Swiss-Prot;Acc:Q6ZWN5]
22215	ENSMUST00000200949	-1.1351	0.0311535	DOWN	ENSMUSG00000025326	O08759	Ube3a	ubiquitin protein ligase E3A [Source:MGI Symbol;Acc:MGI:105098]
97112	ENSMUST00000029358	-1.13483	0.017791	DOWN	ENSMUSG00000027787	Q99L48	Nmd3	60S ribosomal export protein NMD3 [Source:UniProtKB/Swiss-Prot;Acc:Q99L48]
76522	ENSMUST00000128526	-1.13322	0.0273926	DOWN	ENSMUSG00000044155	Q6ZWM4	Lsm8	U6 snRNA-associated Sm-like protein LSm8 [Source:UniProtKB/Swiss-Prot;Acc:Q6ZWM4]
208715	ENSMUST00000224188	-1.12855	0.0484613	DOWN	ENSMUSG00000093930	Q8JZK9	Hmgcs1	3-hydroxy-3-methylglutaryl-Coenzyme A synthase 1
11426	ENSMUST00000147030	-1.12471	0.00710046	DOWN	ENSMUSG00000028649	E9PVY8	Macf1	microtubule-actin crosslinking factor 1 [Source:HGNC Symbol;Acc:HGNC:13664]
16403	ENSMUST00000112101	-1.12416	0.00347265	DOWN	ENSMUSG00000027111	Q6PEE8	Itga6	Integrin alpha-6 Integrin alpha-6 heavy chain Integrin alpha-6 light chain [Source:UniProtKB/Swiss-Prot;Acc:Q61739]
66971	ENSMUST00000152180	-1.123	0.03761	DOWN	ENSMUSG00000027487	Q8BTW8	Cdk5rap1	CDK5 regulatory subunit-associated protein 1 [Source:UniProtKB/Swiss-Prot;Acc:Q8BTW8]
76566	ENSMUST00000021207	-1.12278	0.0454129	DOWN	ENSMUSG00000020846	Q5SVD0	Rflnb	Refilin-B [Source:UniProtKB/Swiss-Prot;Acc:Q5SVD0]
70592	ENSMUST00000176521	-1.12131	0.0408669	DOWN	ENSMUSG00000029089	A0A0G2JE33,A0A0G2JE98	5730480H06Rik	RIKEN cDNA 5730480H06 gene
80981	ENSMUST00000039388	-1.11978	0.00362047	DOWN	ENSMUSG00000034936	Q99PE9	Arl4d	ADP-ribosylation factor-like protein 4D [Source:UniProtKB/Swiss-Prot;Acc:Q99PE9]
13139	ENSMUST00000219834	-1.11739	0.0288166	DOWN	ENSMUSG00000025357	O88673	Dgka	diacylglycerol kinase, alpha
66255	ENSMUST00000166219	-1.11635	0.0379715	DOWN	ENSMUSG00000078963	B2RXB2	Hsbp1l1	heat shock factor binding protein 1-like 1
216198	ENSMUST00000162874	-1.11226	0.0370099	DOWN	ENSMUSG00000020034	Q8K1H7	Tcp11l2	T-complex protein 11-like protein 2 [Source:UniProtKB/Swiss-Prot;Acc:Q8K1H7]
230753	ENSMUST00000151728	-1.11147	0.0291036	DOWN	ENSMUSG00000043962	Q569Z6	Thrap3	thyroid hormone receptor associated protein 3 [Source:MGI Symbol;Acc:MGI:2442637]
21821	ENSMUST00000154492	-1.11146	0.00437942	DOWN	ENSMUSG00000040040	G3X9Z7	Ift88	intraflagellar transport 88 [Source:HGNC Symbol;Acc:HGNC:20606]
18618	ENSMUST00000102693	-1.11142	0.0356143	DOWN	ENSMUSG00000000301	Q61907	Pemt	Phosphatidylethanolamine N-methyltransferase [Source:UniProtKB/Swiss-Prot;Acc:Q61907]
16400	ENSMUST00000107739	-1.11019	0.0176847	DOWN	ENSMUSG00000001507	Q62470	Itga3	Integrin alpha-3 Integrin alpha-3 heavy chain Integrin alpha-3 light chain [Source:UniProtKB/Swiss-Prot;Acc:Q62470]
215446	ENSMUST00000047687	-1.10831	0.0295951	DOWN	ENSMUSG00000041608	Q8BFW6	Entpd3	ectonucleoside triphosphate diphosphohydrolase 3 [Source:RefSeq peptide;Acc:NP_848791]
103737	ENSMUST00000108146	-1.10797	0.0196799	DOWN	ENSMUSG00000018733	Q5SWQ8	Pex12	Peroxisome assembly protein 12 [Source:UniProtKB/Swiss-Prot;Acc:Q8VC48]
67203	ENSMUST00000156041	-1.1079	0.031892	DOWN	ENSMUSG00000022678	Q9CZA6	Nde1	Nuclear distribution 1 [Source:UniProtKB/Swiss-Prot;Acc:Q9CZA6]
71728	ENSMUST00000113553	-1.10788	0.0355507	DOWN	ENSMUSG00000026213	Q3TAA7	Stk11ip	Serine/threonine-protein kinase 11-interacting protein [Source:UniProtKB/Swiss-Prot;Acc:Q3TAA7]
13388	ENSMUST00000014917	-1.10628	0.00479975	DOWN	ENSMUSG00000014773	Q61483	Dll1	Delta-like protein 1 Dll1-soluble form Dll1-derived cell-associated form Dll1-intracellular form [Source:UniProtKB/Swiss-Prot;Acc:Q61483]
224023	ENSMUST00000144116	-1.10607	0.0267421	DOWN	ENSMUSG00000022750	Q99JN2	Klhl22	Mus musculus kelch-like 22 (Klhl22), transcript variant 2, mRNA. [Source:RefSeq mRNA;Acc:NM_001359068]
52685	ENSMUST00000017453	-1.10548	0.0312741	DOWN	ENSMUSG00000017309	Q1ERP8	Cd300lg	CMRF35-like molecule 9 [Source:UniProtKB/Swiss-Prot;Acc:Q1ERP8]
11606	ENSMUST00000063278	-1.10515	0.01858	DOWN	ENSMUSG00000031980	Q3UTR7	Agt	angiotensinogen [Source:HGNC Symbol;Acc:HGNC:333]
381813	ENSMUST00000032500	-1.10255	0.00511487	DOWN	ENSMUSG00000030350	Q6PAK3	Prmt8	protein arginine N-methyltransferase 8 [Source:MGI Symbol;Acc:MGI:3043083]
12821	ENSMUST00000086923	-1.10225	0.0145943	DOWN	ENSMUSG00000025064	Q07563	Col17a1	Collagen alpha-1(XVII) chain 120 kDa linear IgA disease antigen homolog [Source:UniProtKB/Swiss-Prot;Acc:Q07563]
56480	ENSMUST00000020316	-1.10192	0.0199441	DOWN	ENSMUSG00000020115	A1L361	Tbk1	TANK-binding kinase 1
29871	ENSMUST00000064991	-1.10184	0.0194159	DOWN	ENSMUSG00000000085	Q8K214	Scmh1	Polycomb protein SCMH1 [Source:UniProtKB/Swiss-Prot;Acc:Q8K214]
105428	ENSMUST00000090499	-1.10053	0.0160058	DOWN	ENSMUSG00000039599	Q6NSV7	Fam149b	family with sequence similarity 149, member B
245020	ENSMUST00000093792	-1.09819	0.014813	DOWN	ENSMUSG00000070287	D3YVE8	Slc35g2	Solute carrier family 35 member G2 [Source:UniProtKB/Swiss-Prot;Acc:D3YVE8]
68764	ENSMUST00000219065	-1.0981	0.0491817	DOWN	ENSMUSG00000035860	Q8BL00	Cdhr3	cadherin-related family member 3
227707	ENSMUST00000152007	-1.09667	0.0425551	DOWN	ENSMUSG00000026851	Q3TQI7	BC005624	Telomere length and silencing [Source:UniProtKB/Swiss-Prot;Acc:Q3TQI7]
17299	ENSMUST00000135655	-1.09356	0.0213782	DOWN	ENSMUSG00000006732	Q9Z120	Mettl1	tRNA (guanine-N(7)-)-methyltransferase [Source:UniProtKB/Swiss-Prot;Acc:Q9Z120]
72614	ENSMUST00000124029	-1.09296	0.0468862	DOWN	ENSMUSG00000000167	Q8CHR9	Pih1d2	PIH1 domain-containing protein 2 [Source:UniProtKB/Swiss-Prot;Acc:Q8CHR9]
22121	ENSMUST00000209626	-1.09175	0.0282674	DOWN	ENSMUSG00000074129	P19253	Rpl13a	ribosomal protein L13A [Source:MGI Symbol;Acc:MGI:1351455]
381544	ENSMUST00000165128	-1.09139	0.0145133	DOWN	ENSMUSG00000060268	E9Q963	Gm1661	chromosome 1 open reading frame 228 [Source:HGNC Symbol;Acc:HGNC:34345]
13711	ENSMUST00000028609	-1.08768	0.0116506	DOWN	ENSMUSG00000027186	Q8VDK3	Elf5	ETS-related transcription factor Elf-5 [Source:UniProtKB/Swiss-Prot;Acc:Q8VDK3]
108156	ENSMUST00000220321	-1.08764	0.0151387	DOWN	ENSMUSG00000021048	Q3TW74	Mthfd1	methylenetetrahydrofolate dehydrogenase (NADP+ dependent), methenyltetrahydrofolate cyclohydrolase, formyltetrahydrofolate synthase
80284	ENSMUST00000142029	-1.08366	0.0301306	DOWN	ENSMUSG00000042380	Q78RX3	Smim12	Small integral membrane protein 12 [Source:UniProtKB/Swiss-Prot;Acc:Q78RX3]
195727	ENSMUST00000087085	-1.08344	0.0259127	DOWN	ENSMUSG00000059493	B9EJX2	Nhs	NHS actin remodeling regulator [Source:HGNC Symbol;Acc:HGNC:7820]
72029	ENSMUST00000145877	-1.08293	0.0237259	DOWN	ENSMUSG00000023973	Q9DAU1	Cnpy3	3 [Source:UniProtKB/Swiss-Prot;Acc:Q9DAU1]
67049	ENSMUST00000135768	-1.08185	0.00944839	DOWN	ENSMUSG00000032103	Q9JI38	Pus3	tRNA pseudouridine(38/39) synthase [Source:UniProtKB/Swiss-Prot;Acc:Q9JI38]
100503572	ENSMUST00000135402	-1.08036	0.00974688	DOWN	ENSMUSG00000084957	J3QMK2	Bbip1	BBSome interacting protein 1
13521	ENSMUST00000181997	-1.07938	0.0420453	DOWN	ENSMUSG00000034320	Q62273	Slc26a2	Sulfate transporter [Source:UniProtKB/Swiss-Prot;Acc:Q62273]
11677	ENSMUST00000201392	-1.07935	0.024326	DOWN	ENSMUSG00000001642	P45376	Akr1b3	Aldose reductase [Source:UniProtKB/Swiss-Prot;Acc:P45376]
232035	ENSMUST00000131989	-1.07878	0.0182537	DOWN	ENSMUSG00000039578	Q8C0C4	Ccser1	Serine-rich coiled-coil domain-containing protein 1 [Source:UniProtKB/Swiss-Prot;Acc:Q8C0C4]
327762	ENSMUST00000131422	-1.07873	0.0302245	DOWN	ENSMUSG00000036875	Q6ZQJ5	Dna2	DNA replication ATP-dependent helicase/nuclease DNA2 DNA replication nuclease DNA2 DNA replication ATP-dependent helicase DNA2 [Source:UniProtKB/Swiss-Prot;Acc:Q6ZQJ5]
22268	ENSMUST00000057767	-1.07765	0.0134413	DOWN	ENSMUSG00000049436	Q9Z2C6	Upk1b	uroplakin 1B
74340	ENSMUST00000102995	-1.0757	0.037239	DOWN	ENSMUSG00000029772	Q68FL4	Ahcyl2	S-adenosylhomocysteine hydrolase-like 2 [Source:MGI Symbol;Acc:MGI:1921590]
19016	ENSMUST00000171644	-1.07445	0.0235565	DOWN	ENSMUSG00000000440	P37238	Pparg	peroxisome proliferator activated receptor gamma [Source:MGI Symbol;Acc:MGI:97747]
103140	ENSMUST00000133869	-1.0744	0.0255074	DOWN	ENSMUSG00000001665	Q99L20	Gstt3	Mus musculus glutathione S-transferase, theta 3 (Gstt3), transcript variant 2, mRNA. [Source:RefSeq mRNA;Acc:NM_001346523]
50789	ENSMUST00000123043	-1.07364	0.0254114	DOWN	ENSMUSG00000022124	Q5PRF6	Fbxl3	F-box/LRR-repeat protein 3 [Source:UniProtKB/Swiss-Prot;Acc:Q8C4V4]
232089	ENSMUST00000141833	-1.07315	0.0440958	DOWN	ENSMUSG00000056698	Q91YP6	Elmod3	ELMO domain-containing protein 3 [Source:UniProtKB/Swiss-Prot;Acc:Q91YP6]
223776	ENSMUST00000082439	-1.06844	0.0446886	DOWN	ENSMUSG00000035757	Q9DBC0	Selenoo	Selenoprotein O [Source:UniProtKB/Swiss-Prot;Acc:Q9DBC0]
170789	ENSMUST00000103094	-1.06423	0.0346079	DOWN	ENSMUSG00000017307	P58137	Acot8	Acyl-coenzyme A thioesterase 8 [Source:UniProtKB/Swiss-Prot;Acc:P58137]
68481	ENSMUST00000111435	-1.064	0.0214148	DOWN	ENSMUSG00000026566	Q3TEW6	Mpzl1	myelin protein zero-like 1 [Source:MGI Symbol;Acc:MGI:1915731]
17101	ENSMUST00000221717	-1.06374	0.0274925	DOWN	ENSMUSG00000019726	G5E8Q0	Lyst	lysosomal trafficking regulator
231042	ENSMUST00000049887	-1.06364	0.0049284	DOWN	ENSMUSG00000048439	Q8CIC2	Nupl2	nucleoporin like 2 [Source:HGNC Symbol;Acc:HGNC:17010]
108664	ENSMUST00000194978	-1.06292	0.0223124	DOWN	ENSMUSG00000033793	Q8BVE3	Atp6v1h	V-type proton ATPase subunit H [Source:UniProtKB/Swiss-Prot;Acc:Q8BVE3]
234684	ENSMUST00000210801	-1.06233	0.0469204	DOWN	ENSMUSG00000041679	Q3UG51	Lrrc29	leucine rich repeat containing 29 [Source:HGNC Symbol;Acc:HGNC:13605]
89867	ENSMUST00000086130	-1.06164	0.0209584	DOWN	ENSMUSG00000026589	Q91XT4	Sec16b	Protein transport protein Sec16B [Source:UniProtKB/Swiss-Prot;Acc:Q91XT4]
66223	ENSMUST00000065103	-1.06009	0.00854087	DOWN	ENSMUSG00000052962	Q9CQL6	Mrpl35	39S ribosomal protein L35, mitochondrial [Source:UniProtKB/Swiss-Prot;Acc:Q9CQL6]
226527	ENSMUST00000046743	-1.05762	0.0247024	DOWN	ENSMUSG00000033488	Q3UNZ8	Cryzl2	crystallin zeta like 2 [Source:MGI Symbol;Acc:MGI:2448516]
56699	ENSMUST00000053536	-1.05682	0.0149578	DOWN	ENSMUSG00000041598	Q9JM96	Cdc42ep4	Cdc42 effector protein 4 [Source:UniProtKB/Swiss-Prot;Acc:Q9JM96]
270150	ENSMUST00000092426	-1.05579	0.00526597	DOWN	ENSMUSG00000070306	P0C7Q1	Ccdc153	Coiled-coil domain-containing protein 153 [Source:UniProtKB/Swiss-Prot;Acc:P0C7Q1]
74711	ENSMUST00000099197	-1.0557	0.0278703	DOWN	ENSMUSG00000074673	A2APC3	Ttll9	tubulin tyrosine ligase-like family, member 9 [Source:MGI Symbol;Acc:MGI:1913589]
11847	ENSMUST00000021550	-1.05452	0.0115957	DOWN	ENSMUSG00000021125	O08691	Arg2	Arginase-2, mitochondrial [Source:UniProtKB/Swiss-Prot;Acc:O08691]
16408	ENSMUST00000117762	-1.05385	0.00805744	DOWN	ENSMUSG00000030830	E9Q5M7	Itgal	Integrin alpha-L [Source:UniProtKB/Swiss-Prot;Acc:P24063]
13000	ENSMUST00000212214	-1.05382	0.00532111	DOWN	ENSMUSG00000046707	Q545V8	Csnk2a2	Casein kinase II subunit alpha' [Source:UniProtKB/Swiss-Prot;Acc:O54833]
53978	ENSMUST00000034325	-1.05285	0.00466804	DOWN	ENSMUSG00000031861	Q6P290	Lpar2	lysophosphatidic acid receptor 2
73067	ENSMUST00000026595	-1.05219	0.0221726	DOWN	ENSMUSG00000025521	Q9CXT7	Tmem192	Transmembrane protein 192 [Source:UniProtKB/Swiss-Prot;Acc:Q9CXT7]
15976	ENSMUST00000089042	-1.05172	0.0217699	DOWN	ENSMUSG00000022971	O35664	Ifnar2	interferon (alpha and beta) receptor 2 [Source:MGI Symbol;Acc:MGI:1098243]
66282	ENSMUST00000026681	-1.05157	0.0103671	DOWN	ENSMUSG00000025591	Q9CR02	Tma16	Translation machinery-associated protein 16 [Source:UniProtKB/Swiss-Prot;Acc:Q9CR02]
69038	ENSMUST00000127878	-1.05069	0.0402858	DOWN	ENSMUSG00000036372	P61166	Tmem258	transmembrane protein 258 [Source:MGI Symbol;Acc:MGI:1916288]
67843	ENSMUST00000168343	-1.04916	0.0173077	DOWN	ENSMUSG00000033272	Q9D321	Slc35a4	Probable UDP-sugar transporter protein SLC35A4 [Source:UniProtKB/Swiss-Prot;Acc:Q9D321]
56338	ENSMUST00000049093	-1.04786	0.00318693	DOWN	ENSMUSG00000038393	Q8BG60	Txnip	thioredoxin interacting protein [Source:MGI Symbol;Acc:MGI:1889549]
15558	ENSMUST00000036653	-1.04705	0.00485153	DOWN	ENSMUSG00000034997	Q543D4	Htr2a	5-hydroxytryptamine (serotonin) receptor 2A
353156	ENSMUST00000147351	-1.04688	0.0264576	DOWN	ENSMUSG00000026921	Q9QXT5	Egfl7	EGF like domain multiple 7 [Source:HGNC Symbol;Acc:HGNC:20594]
271813	ENSMUST00000170320	-1.04666	0.0112431	DOWN	ENSMUSG00000040812	Q8CDK2	Agbl2	Mus musculus ATP/GTP binding protein-like 2 (Agbl2), transcript variant 2, mRNA. [Source:RefSeq mRNA;Acc:NM_001356533]
76892	ENSMUST00000125675	-1.04152	0.0367025	DOWN	ENSMUSG00000020521	Q9DCN7	Rnft1	E3 ubiquitin-protein ligase RNFT1 [Source:UniProtKB/Swiss-Prot;Acc:Q9DCN7]
208718	ENSMUST00000190618	-1.0412	0.0277586	DOWN	ENSMUSG00000053333	Q8CI75	Dis3l2	DIS3-like exonuclease 2 [Source:UniProtKB/Swiss-Prot;Acc:Q8CI75]
56453	ENSMUST00000212601	-1.04088	0.0205268	DOWN	ENSMUSG00000031835	Q9WTZ2	Mbtps1	Membrane-bound transcription factor site-1 protease [Source:UniProtKB/Swiss-Prot;Acc:Q9WTZ2]
108811	ENSMUST00000048208	-1.03729	0.00961927	DOWN	ENSMUSG00000034795	Q8BVN0	Ccdc122	Coiled-coil domain-containing protein 122 [Source:UniProtKB/Swiss-Prot;Acc:Q8BVN0]
78937	ENSMUST00000177249	-1.03683	0.0425116	DOWN	ENSMUSG00000029787	Q80U56	Avl9	Late secretory pathway [Source:UniProtKB/Swiss-Prot;Acc:Q80U56]
15357	ENSMUST00000170287	-1.03631	0.0408706	DOWN	ENSMUSG00000021670	Q8BV96	Hmgcr	3-hydroxy-3-methylglutaryl-coenzyme A reductase [Source:UniProtKB/Swiss-Prot;Acc:Q01237]
108156	ENSMUST00000218110	-1.03513	0.0415839	DOWN	ENSMUSG00000021048	Q3TW74	Mthfd1	methylenetetrahydrofolate dehydrogenase (NADP+ dependent), methenyltetrahydrofolate cyclohydrolase, formyltetrahydrofolate synthase
109294	ENSMUST00000027056	-1.03465	0.00276342	DOWN	ENSMUSG00000048960	Q3LAC4	Prex2	Phosphatidylinositol 3,4,5-trisphosphate-dependent Rac exchanger 2 protein [Source:UniProtKB/Swiss-Prot;Acc:Q3LAC4]
56312	ENSMUST00000131174	-1.03421	0.0232755	DOWN	ENSMUSG00000030717	Q9WTK0	Nupr1	Nuclear protein 1 [Source:UniProtKB/Swiss-Prot;Acc:Q9WTK0]
70510	ENSMUST00000141237	-1.03357	0.0404171	DOWN	ENSMUSG00000040746	Q91XF4	Rnf167	E3 ubiquitin-protein ligase RNF167 [Source:UniProtKB/Swiss-Prot;Acc:Q91XF4]
17975	ENSMUST00000186050	-1.03194	0.0386447	DOWN	ENSMUSG00000026234	P09405	Ncl	Nucleolin [Source:UniProtKB/Swiss-Prot;Acc:P09405]
72349	ENSMUST00000003612	-1.03146	0.0297294	DOWN	ENSMUSG00000003518	Q9D7X3	Dusp3	Dual specificity protein phosphatase 3 [Source:UniProtKB/Swiss-Prot;Acc:Q9D7X3]
17684	ENSMUST00000219558	-1.03089	0.0387342	DOWN	ENSMUSG00000039910	O35740	Cited2	Cbp/p300-interacting transactivator, with Glu/Asp-rich carboxy-terminal domain, 2
15936	ENSMUST00000060427	-1.02994	0.0267196	DOWN	ENSMUSG00000053560	P17950	Ier2	immediate early response 2
80517	ENSMUST00000214190	-1.02962	0.0136943	DOWN	ENSMUSG00000008429	Q9JJC9	Herpud2	Homocysteine-responsive endoplasmic reticulum-resident ubiquitin-like domain member 2 protein [Source:UniProtKB/Swiss-Prot;Acc:Q9JJC9]
56399	ENSMUST00000002699	-1.02871	0.0207315	DOWN	ENSMUSG00000024045	Q059U9	Akap8	A kinase (PRKA) anchor protein 8
68121	ENSMUST00000191014	-1.02802	0.0252477	DOWN	ENSMUSG00000056267	Q6IQY5	Cep70	Centrosomal protein of 70 kDa [Source:UniProtKB/Swiss-Prot;Acc:Q6IQY5]
68121	ENSMUST00000190715	-1.02764	0.0139571	DOWN	ENSMUSG00000056267	Q6IQY5	Cep70	Centrosomal protein of 70 kDa [Source:UniProtKB/Swiss-Prot;Acc:Q6IQY5]
13710	ENSMUST00000003135	-1.02671	0.0176915	DOWN	ENSMUSG00000003051	Q3UPW2	Elf3	ETS-related transcription factor Elf-3 [Source:UniProtKB/Swiss-Prot;Acc:Q3UPW2]
12125	ENSMUST00000146023	-1.02503	0.0437943	DOWN	ENSMUSG00000027381	O54918	Bcl2l11	Bcl-2-like protein 11 [Source:UniProtKB/Swiss-Prot;Acc:O54918]
98258	ENSMUST00000193832	-1.02448	0.0127363	DOWN	ENSMUSG00000058407	Q9CQ79	Txndc9	thioredoxin domain containing 9 [Source:MGI Symbol;Acc:MGI:2138153]
22221	ENSMUST00000216558	-1.0232	0.027816	DOWN	ENSMUSG00000009741	Q811S7	Ubp1	upstream binding protein 1 [Source:MGI Symbol;Acc:MGI:104889]
22228	ENSMUST00000126381	-1.02312	0.0427215	DOWN	ENSMUSG00000033685	Q549J5	Ucp2	uncoupling protein 2 (mitochondrial, proton carrier) [Source:MGI Symbol;Acc:MGI:109354]
623121	ENSMUST00000097462	-1.02177	0.0157026	DOWN	ENSMUSG00000073491	Q3UPZ5	Ifi213	interferon activated gene 213
53859	ENSMUST00000146163	-1.01868	0.0433604	DOWN	ENSMUSG00000020941	Q9WUL6	Map3k14	Mitogen-activated protein kinase kinase kinase 14 [Source:UniProtKB/Swiss-Prot;Acc:Q9WUL6]
381038	ENSMUST00000155832	-1.0185	0.0315706	DOWN	ENSMUSG00000033918	Q5XJY4	Parl	Presenilins-associated rhomboid-like protein, mitochondrial P-beta [Source:UniProtKB/Swiss-Prot;Acc:Q5XJY4]
12007	ENSMUST00000035390	-1.0183	0.0243455	DOWN	ENSMUSG00000037053	Q64726	Azgp1	Zinc-alpha-2-glycoprotein [Source:UniProtKB/Swiss-Prot;Acc:Q64726]
634386	ENSMUST00000221435	-1.01623	0.0337398	DOWN	ENSMUSG00000062382	A0A1Y7VNT9	Ftl1-ps1	ferritin light polypeptide 1, pseudogene 1
56224	ENSMUST00000142890	-1.01603	0.0360511	DOWN	ENSMUSG00000028152	P62080	Tspan5	tetraspanin 5 [Source:MGI Symbol;Acc:MGI:1928096]
107508	ENSMUST00000192284	-1.01558	0.0451207	DOWN	ENSMUSG00000026615	Q8CGC7	Eprs	Mus musculus glutamyl-prolyl-tRNA synthetase (Eprs), transcript variant 2, mRNA. [Source:RefSeq mRNA;Acc:NM_001357474]
74155	ENSMUST00000030811	-1.01499	0.01866	DOWN	ENSMUSG00000028967	Q3TK48	Errfi1	Mus musculus ERBB receptor feedback inhibitor 1 (Errfi1), transcript variant 1, mRNA. [Source:RefSeq mRNA;Acc:NM_001356323]
328162	ENSMUST00000084947	-1.01268	0.0379035	DOWN	ENSMUSG00000060950	Q80XC2	Trmt61a	tRNA methyltransferase 61A
213417	ENSMUST00000046071	-1.01027	0.0444497	DOWN	ENSMUSG00000042115	Q91XA8	Klhdc8a	Kelch domain-containing protein 8A [Source:UniProtKB/Swiss-Prot;Acc:Q91XA8]
80287	ENSMUST00000175849	-1.00637	0.0235432	DOWN	ENSMUSG00000009585	H3BJD1,H3BL97,G3KG21,G3KG22,G3KG23,A0A2R8VHT8,B5T0J0,G3KJG6,G3KJG5,G3KFZ3,Q3UZ34,Q99J72,E9QMH1,G3KG05,C3UP55,H3BJJ6,C3UP59,Q3TI69,H3BKS1,H3BKS5,B5T0I7,B5T0I8,B5T0I9,E2D6P1,G3KG18,E2D6P3,E2D6P2,Q3U5C5,G3KG12,G3KG17,B9ZZS3,A0A2R8VKS7,B9ZZS2	Apobec3	apolipoprotein B mRNA editing enzyme, catalytic polypeptide 3 [Source:MGI Symbol;Acc:MGI:1933111]
74393	ENSMUST00000053078	-1.0036	0.00564728	DOWN	ENSMUSG00000050930	Q8BJS7	Map10	Microtubule-associated protein 10 [Source:UniProtKB/Swiss-Prot;Acc:Q8BJS7]
11987	ENSMUST00000201860	-1.00215	0.0185206	DOWN	ENSMUSG00000041313	Q3UGD6	Slc7a1	solute carrier family 7 (cationic amino acid transporter, y+ system), member 1 [Source:MGI Symbol;Acc:MGI:88117]
382137	ENSMUST00000042391	-1.0009	0.00999505	DOWN	ENSMUSG00000037845	Q3UY23	Fdxacb1	Ferredoxin-fold anticodon-binding domain-containing [Source:UniProtKB/Swiss-Prot;Acc:Q3UY23]
11787	ENSMUST00000159847	1.00068	0.0307198	UP	ENSMUSG00000029207	F6V9I9	Apbb2	Amyloid-beta A4 protein-binding family B member 2 [Source:UniProtKB/Swiss-Prot;Acc:Q9DBR4]
22780	ENSMUST00000103141	1.00164	0.0272079	UP	ENSMUSG00000018168	O08900	Ikzf3	Zinc finger protein Aiolos [Source:UniProtKB/Swiss-Prot;Acc:O08900]
270086	ENSMUST00000141636	1.00334	0.0267187	UP	ENSMUSG00000033009	Q3U0K8	Ogfod1	Prolyl 3-hydroxylase OGFOD1 [Source:UniProtKB/Swiss-Prot;Acc:Q3U0K8]
23834	ENSMUST00000133779	1.00655	0.0318556	UP	ENSMUSG00000017499	O89033	Cdc6	Cell division control [Source:UniProtKB/Swiss-Prot;Acc:O89033]
104759	ENSMUST00000220826	1.00666	0.0405322	UP	ENSMUSG00000052160	Q8BG07	Pld4	phospholipase D family, member 4
66975	ENSMUST00000144060	1.00736	0.0382941	UP	ENSMUSG00000021711	Q3TIR1	Trappc13	Trafficking protein particle complex subunit 13 [Source:UniProtKB/Swiss-Prot;Acc:Q3TIR1]
19091	ENSMUST00000182685	1.0079	0.0397346	UP	ENSMUSG00000052920	Q8BND1	Prkg1	protein kinase, cGMP-dependent, type I [Source:MGI Symbol;Acc:MGI:108174]
56720	ENSMUST00000029645	1.01099	0.0170399	UP	ENSMUSG00000028011	Q8VCW3	Tdo2	tryptophan 2,3-dioxygenase [Source:MGI Symbol;Acc:MGI:1928486]
103967	ENSMUST00000161155	1.01177	0.0394415	UP	ENSMUSG00000040265	Q8BZ98	Dnm3	Dynamin-3 [Source:UniProtKB/Swiss-Prot;Acc:Q8BZ98]
70885	ENSMUST00000110241	1.01467	0.0430715	UP	ENSMUSG00000031864	Q8K2A7	Ints10	Integrator complex subunit 10 [Source:UniProtKB/Swiss-Prot;Acc:Q8K2A7]
380614	ENSMUST00000091186	1.01511	0.0176702	UP	ENSMUSG00000060798	Q059U7	Intu	Protein inturned [Source:UniProtKB/Swiss-Prot;Acc:Q059U7]
16551	ENSMUST00000012587	1.0158	0.0384757	UP	ENSMUSG00000012443	Q6P9P6	Kif11	kinesin family member 11
12615	ENSMUST00000197962	1.0169	0.0189339	UP	ENSMUSG00000029177	O35216	Cenpa	Histone H3-like centromeric protein A [Source:UniProtKB/Swiss-Prot;Acc:O35216]
212111	ENSMUST00000152475	1.02023	0.016728	UP	ENSMUSG00000025477	Q7TNC9	Inpp5a	inositol polyphosphate-5-phosphatase A [Source:MGI Symbol;Acc:MGI:2686961]
71365	ENSMUST00000160823	1.02084	0.0202754	UP	ENSMUSG00000038240	Q33DR3	Pdss2	prenyl (solanesyl) diphosphate synthase, subunit 2 [Source:MGI Symbol;Acc:MGI:1918615]
70661	ENSMUST00000215954	1.02151	0.0172345	UP	ENSMUSG00000034135	Q6P4S6	Sik3	SIK family kinase 3 [Source:HGNC Symbol;Acc:HGNC:29165]
237256	ENSMUST00000039484	1.02244	0.0231975	UP	ENSMUSG00000039981	Q8BIY3	Zc3h12d	zinc finger CCCH type containing 12D
207278	ENSMUST00000208063	1.02451	0.0120405	UP	ENSMUSG00000030691	Q3USJ8	Fchsd2	F-BAR and double SH3 domains protein 2 [Source:UniProtKB/Swiss-Prot;Acc:Q3USJ8]
19264	ENSMUST00000187586	1.02477	0.00792477	UP	ENSMUSG00000026395	S4R1S4	Ptprc	protein tyrosine phosphatase, receptor type, C [Source:MGI Symbol;Acc:MGI:97810]
73711	ENSMUST00000212336	1.02714	0.049897	UP	ENSMUSG00000031813	Q78HU3	Mvb12a	Multivesicular body subunit 12A [Source:UniProtKB/Swiss-Prot;Acc:Q78HU3]
72607	ENSMUST00000072312	1.02846	0.0121149	UP	ENSMUSG00000056900	Q5BKP2	Usp13	ubiquitin specific peptidase 13 (isopeptidase T-3) [Source:MGI Symbol;Acc:MGI:1919857]
68473	ENSMUST00000125171	1.02976	0.0159844	UP	ENSMUSG00000006262	Q8BPB0	Mob1b	MOB kinase activator 1B [Source:UniProtKB/Swiss-Prot;Acc:Q8BPB0]
229841	ENSMUST00000062893	1.03193	0.0382711	UP	ENSMUSG00000045328	E9QKK1	Cenpe	centromere protein E [Source:HGNC Symbol;Acc:HGNC:1856]
13605	ENSMUST00000108300	1.03259	0.00981769	UP	ENSMUSG00000027699	Q07139	Ect2	Protein ECT2 [Source:UniProtKB/Swiss-Prot;Acc:Q07139]
208092	ENSMUST00000139814	1.03282	0.0416406	UP	ENSMUSG00000025371	P0C0A3	Chmp6	Charged multivesicular body protein 6 [Source:UniProtKB/Swiss-Prot;Acc:P0C0A3]
108958	ENSMUST00000137441	1.03352	0.0181205	UP	ENSMUSG00000026858	Q8BK03	Miga2	Mitoguardin 2 [Source:UniProtKB/Swiss-Prot;Acc:Q8BK03]
56380	ENSMUST00000164035	1.03474	0.0227666	UP	ENSMUSG00000004661	Q9Z1N7	Arid3b	AT-rich interactive domain-containing protein 3B [Source:UniProtKB/Swiss-Prot;Acc:Q9Z1N7]
75089	ENSMUST00000218776	1.03528	0.0472042	UP	ENSMUSG00000019951	Q9D574	Uhrf1bp1l	UHRF1 (ICBP90) binding protein 1-like
17952	ENSMUST00000118574	1.03644	0.0174089	UP	ENSMUSG00000078942	Q9JIB6	Naip6	NLR family, apoptosis inhibitory protein 6 [Source:MGI Symbol;Acc:MGI:1298222]
232811	ENSMUST00000129927	1.03728	0.0105298	UP	ENSMUSG00000059851	Q6Q783	Kmt5c	Mus musculus lysine methyltransferase 5C (Kmt5c), transcript variant 3, mRNA. [Source:RefSeq mRNA;Acc:NM_001358044]
77041	ENSMUST00000224884	1.0375	0.0482018	UP	ENSMUSG00000021592	Q9D2L1	Arsk	arylsulfatase family member K [Source:HGNC Symbol;Acc:HGNC:25239]
235431	ENSMUST00000123379	1.0392	0.0318237	UP	ENSMUSG00000041729	Q8BH44	Coro2b	Coronin-2B [Source:UniProtKB/Swiss-Prot;Acc:Q8BH44]
215512	ENSMUST00000155999	1.04082	0.0258878	UP	ENSMUSG00000038893	Q7TNF9	Fam117a	Protein FAM117A [Source:UniProtKB/Swiss-Prot;Acc:Q7TNF9]
107769	ENSMUST00000124616	1.04262	0.0108579	UP	ENSMUSG00000038623	P58749	Tm6sf1	transmembrane 6 superfamily member 1 [Source:MGI Symbol;Acc:MGI:1933209]
333639	ENSMUST00000082088	1.0434	0.00845523	UP	ENSMUSG00000059401	P0C6A2	Mamld1	Mastermind-like domain-containing protein 1 [Source:UniProtKB/Swiss-Prot;Acc:P0C6A2]
14886	ENSMUST00000201371	1.04603	0.0117228	UP	ENSMUSG00000060261	Q9ESZ8	Gtf2i	Mus musculusral transcription factor II I (Gtf2i), transcript variant 7, mRNA. [Source:RefSeq mRNA;Acc:NM_001359063]
320924	ENSMUST00000061103	1.04808	0.00472504	UP	ENSMUSG00000046318	Q3MI99	Ccbe1	Collagen and calcium-binding EGF domain-containing protein 1 [Source:UniProtKB/Swiss-Prot;Acc:Q3MI99]
218194	ENSMUST00000132050	1.04879	0.0087817	UP	ENSMUSG00000054728	Q2M3X8	Phactr1	Phosphatase and actin regulator 1 [Source:UniProtKB/Swiss-Prot;Acc:Q2M3X8]
83486	ENSMUST00000194801	1.05036	0.0267022	UP	ENSMUSG00000032580	Q91YE7	Rbm5	RNA-binding protein 5 [Source:UniProtKB/Swiss-Prot;Acc:Q91YE7]
57267	ENSMUST00000219294	1.05092	0.0487357	UP	ENSMUSG00000004931	O88888	Apba3	amyloid beta (A4) precursor protein-binding, family A, member 3
26432	ENSMUST00000161906	1.0512	0.0422198	UP	ENSMUSG00000032374	Q9R0B9	Plod2	Procollagen-lysine,2-oxoglutarate 5-dioxygenase 2 [Source:UniProtKB/Swiss-Prot;Acc:Q9R0B9]
227693	ENSMUST00000154231	1.05215	0.0194524	UP	ENSMUSG00000039686	Q80ZJ6	Zer1	zyg-11 related, cell cycle regulator [Source:MGI Symbol;Acc:MGI:2442511]
219103	ENSMUST00000225951	1.05224	0.0353295	UP	ENSMUSG00000064128	Q569L8	Cenpj	Centromere protein J [Source:UniProtKB/Swiss-Prot;Acc:Q569L8]
13016	ENSMUST00000201514	1.05287	0.0192282	UP	ENSMUSG00000037373	O88712	Ctbp1	C-terminal-binding protein 1 [Source:UniProtKB/Swiss-Prot;Acc:O88712]
17909	ENSMUST00000131834	1.05329	0.0418087	UP	ENSMUSG00000022272	Q80TR9	Myo10	Mus musculus myosin X (Myo10), transcript variant 3, mRNA. [Source:RefSeq mRNA;Acc:NM_001353142]
56215	ENSMUST00000133706	1.05449	0.0274853	UP	ENSMUSG00000022185	Q9JIX8	Acin1	apoptotic chromatin condensation inducer 1 [Source:MGI Symbol;Acc:MGI:1891824]
17480	ENSMUST00000102671	1.05637	0.00932825	UP	ENSMUSG00000006389	Q08351	Mpl	Thrombopoietin receptor [Source:UniProtKB/Swiss-Prot;Acc:Q08351]
70461	ENSMUST00000127182	1.05748	0.0204792	UP	ENSMUSG00000030527	Q91X84	Crtc3	CREB-regulated transcription coactivator 3 [Source:UniProtKB/Swiss-Prot;Acc:Q91X84]
241447	ENSMUST00000183755	1.06014	0.0377165	UP	ENSMUSG00000027035	Q8C172	Cers6	Ceramide synthase 6 [Source:UniProtKB/Swiss-Prot;Acc:Q8C172]
26894	ENSMUST00000032220	1.06102	0.00360643	UP	ENSMUSG00000030127	Q9CZ04	Cops7a	Mus musculus COP9 signalosome subunit 7A (Cops7a), transcript variant 4, mRNA. [Source:RefSeq mRNA;Acc:NM_001355542]
71918	ENSMUST00000069180	1.06127	0.0487667	UP	ENSMUSG00000055538	B2RVL6	Zcchc24	zinc finger, CCHC domain containing 24 [Source:MGI Symbol;Acc:MGI:1919168]
50780	ENSMUST00000126338	1.0616	0.0277362	UP	ENSMUSG00000059810	Q9DC04	Rgs3	regulator of G-protein signaling 3 [Source:MGI Symbol;Acc:MGI:1354734]
109700	ENSMUST00000224541	1.06223	0.0130991	UP	ENSMUSG00000042284	Q8BPT3	Itga1	integrin alpha 1
210356	ENSMUST00000057846	1.06501	0.0197018	UP	ENSMUSG00000049690	Q6NZK2	Nckap5	NCK-associated protein 5 [Source:MGI Symbol;Acc:MGI:2686394]
71371	ENSMUST00000218425	1.0662	0.00984566	UP	ENSMUSG00000019947	Q8BM75	Arid5b	AT rich interactive domain 5B (MRF1-like)
271564	ENSMUST00000225764	1.06993	0.00825216	UP	ENSMUSG00000046230	Q6P6M9	Vps13a	vacuolar protein sorting 13A
20913	ENSMUST00000107872	1.0704	0.0228759	UP	ENSMUSG00000020546	Q9WV89	Stxbp4	Syntaxin-binding protein 4 [Source:UniProtKB/Swiss-Prot;Acc:Q9WV89]
20725	ENSMUST00000112706	1.0752	0.00515929	UP	ENSMUSG00000026315	O08800	Serpinb8	Serpin B8 [Source:UniProtKB/Swiss-Prot;Acc:O08800]
12394	ENSMUST00000189679	1.07548	0.0214546	UP	ENSMUSG00000022952	Q3UM65	Runx1	runt related transcription factor 1 [Source:MGI Symbol;Acc:MGI:99852]
72238	ENSMUST00000024717	1.07571	0.00404203	UP	ENSMUSG00000023923	Q80XQ2	Tbc1d5	TBC1 domain family, member 5
59003	ENSMUST00000202941	1.07588	0.0444123	UP	ENSMUSG00000079562	Q4VC33	Maea	Macrophage erythroblast attacher [Source:UniProtKB/Swiss-Prot;Acc:Q4VC33]
68952	ENSMUST00000079423	1.07794	0.02481	UP	ENSMUSG00000058966	Q7TNV1	Fam57b	Protein FAM57B [Source:UniProtKB/Swiss-Prot;Acc:Q7TNV1]
50915	ENSMUST00000134020	1.07894	0.0215074	UP	ENSMUSG00000026888	A2ASX2	Grb14	Growth factor receptor-bound protein 14 [Source:UniProtKB/Swiss-Prot;Acc:Q9JLM9]
668880	ENSMUST00000229722	1.07925	0.00510898	UP	ENSMUSG00000033705	Q80TF6,A2AKH9,A2AKI0,F7B335,Q8C0V5	Stard9	StAR-related lipid transfer protein 9 [Source:UniProtKB/Swiss-Prot;Acc:Q80TF6]
53893	ENSMUST00000138549	1.08026	0.0361524	UP	ENSMUSG00000025817	Q9JKX6	Nudt5	ADP-sugar pyrophosphatase [Source:UniProtKB/Swiss-Prot;Acc:Q9JKX6]
17524	ENSMUST00000114091	1.0815	0.0193387	UP	ENSMUSG00000031402	Q542P4	Mpp1	membrane protein, palmitoylated [Source:MGI Symbol;Acc:MGI:105941]
67045	ENSMUST00000024627	1.08232	0.0175272	UP	ENSMUSG00000023852	Q9CQS5	Chd1	RIO kinase 2
194590	ENSMUST00000155043	1.08621	0.0205629	UP	ENSMUSG00000040855	Q80XA6	Reps2	RALBP1 associated Eps domain containing protein 2 [Source:MGI Symbol;Acc:MGI:2663511]
72772	ENSMUST00000132260	1.08752	0.0138264	UP	ENSMUSG00000028999	Q8BZ36	Rint1	RAD50 interactor 1 [Source:MGI Symbol;Acc:MGI:1916233]
27399	ENSMUST00000177158	1.08775	0.00842993	UP	ENSMUSG00000032594	Q6PD10	Ip6k1	Inositol hexakisphosphate kinase 1 [Source:UniProtKB/Swiss-Prot;Acc:Q6PD10]
226517	ENSMUST00000188937	1.0883	0.0242338	UP	ENSMUSG00000042772	Q5RJH6	Smg7	Protein SMG7 [Source:UniProtKB/Swiss-Prot;Acc:Q5RJH6]
13006	ENSMUST00000171083	1.08848	0.0398337	UP	ENSMUSG00000024974	Q1HL32	Smc3	Structural maintenance of chromosomes protein 3 [Source:UniProtKB/Swiss-Prot;Acc:Q9CW03]
223870	ENSMUST00000180531	1.09172	0.0358326	UP	ENSMUSG00000033075	P59110	Senp1	Sentrin-specific protease 1 [Source:UniProtKB/Swiss-Prot;Acc:P59110]
73747	ENSMUST00000141460	1.09187	0.0394098	UP	ENSMUSG00000044991	Q9D112	1110034G24Rik	RIKEN cDNA 1110034G24 gene [Source:MGI Symbol;Acc:MGI:1920997]
18195	ENSMUST00000107009	1.09238	0.0377784	UP	ENSMUSG00000034187	P46460	Nsf	Vesicle-fusing ATPase [Source:UniProtKB/Swiss-Prot;Acc:P46460]
70472	ENSMUST00000227134	1.09503	0.0188826	UP	ENSMUSG00000022360	G3X963	Atad2	ATPase family, AAA domain containing 2
75345	ENSMUST00000192195	1.09625	0.00497131	UP	ENSMUSG00000038179	Q8BHK6	Slamf7	SLAM family member 7 [Source:MGI Symbol;Acc:MGI:1922595]
332175	ENSMUST00000165648	1.09713	0.0484741	UP	ENSMUSG00000036304	Q5Y5T3	Zdhhc23	zinc finger, DHHC domain containing 23
14270	ENSMUST00000189893	1.099	0.00898857	UP	ENSMUSG00000026425	Q91Z67	Srgap2	SLIT-ROBO Rho GTPase-activating protein 2 [Source:UniProtKB/Swiss-Prot;Acc:Q91Z67]
382113	ENSMUST00000093775	1.10075	0.0249749	UP	ENSMUSG00000070280	Q497L9	Slc22a14	solute carrier family 22 (organic cation transporter), member 14 [Source:MGI Symbol;Acc:MGI:2685974]
27405	ENSMUST00000031239	1.10107	0.0396184	UP	ENSMUSG00000029299	Q99P81	Abcg3	ATP binding cassette subfamily G member 3 [Source:MGI Symbol;Acc:MGI:1351624]
16571	ENSMUST00000048962	1.1032	0.0191395	UP	ENSMUSG00000034311	P33174	Kif4	Chromosome-associated kinesin KIF4 [Source:UniProtKB/Swiss-Prot;Acc:P33174]
109700	ENSMUST00000224865	1.10533	0.0465493	UP	ENSMUSG00000042284	Q8BPT3	Itga1	integrin alpha 1
74015	ENSMUST00000127005	1.10815	0.0484208	UP	ENSMUSG00000070000	Q8K285	Fcho1	F-BAR domain only protein 1 [Source:UniProtKB/Swiss-Prot;Acc:Q8K285]
69538	ENSMUST00000205033	1.11243	0.0397472	UP	ENSMUSG00000033420	Q9CZ52	Antxr1	Anthrax toxin receptor 1 [Source:UniProtKB/Swiss-Prot;Acc:Q9CZ52]
216274	ENSMUST00000218703	1.11252	0.0250713	UP	ENSMUSG00000019971	Q6A078	Cep290	centrosomal protein 290
26549	ENSMUST00000033674	1.11389	0.0348826	UP	ENSMUSG00000031312	Q9R000	Itgb1bp2	Integrin beta-1-binding protein 2 [Source:UniProtKB/Swiss-Prot;Acc:Q9R000]
224090	ENSMUST00000125260	1.11514	0.00267639	UP	ENSMUSG00000022537	Q8C820	Tmem44	Mus musculus transmembrane protein 44 (Tmem44), transcript variant 3, mRNA. [Source:RefSeq mRNA;Acc:NM_001357413]
78885	ENSMUST00000139072	1.11961	0.0245872	UP	ENSMUSG00000039637	Q9D2V7	Coro7	Coronin-7 [Source:UniProtKB/Swiss-Prot;Acc:Q9D2V7]
227700	ENSMUST00000151354	1.12024	0.0216298	UP	ENSMUSG00000026860	B0LDS3	Sh3glb2	SH3-domain GRB2-like endophilin B2 [Source:MGI Symbol;Acc:MGI:2385131]
231225	ENSMUST00000055128	1.12171	0.0252235	UP	ENSMUSG00000046985	Q4VBD2	Tapt1	Transmembrane anterior posterior transformation protein 1 [Source:UniProtKB/Swiss-Prot;Acc:Q4VBD2]
16906	ENSMUST00000025486	1.1233	0.0376919	UP	ENSMUSG00000024590	P14733	Lmnb1	Lamin-B1 [Source:UniProtKB/Swiss-Prot;Acc:P14733]
70381	ENSMUST00000085701	1.12691	0.00106755	UP	ENSMUSG00000066621	Q80VP0	Tecpr1	Tectonin beta-propeller repeat-containing protein 1 [Source:UniProtKB/Swiss-Prot;Acc:Q80VP0]
69082	ENSMUST00000130948	1.1272	0.0449059	UP	ENSMUSG00000027091	Q3TIV5	Zc3h15	zinc finger CCCH-type containing 15 [Source:MGI Symbol;Acc:MGI:1919747]
71709	ENSMUST00000040580	1.12791	0.00824557	UP	ENSMUSG00000032714	G3X960	Syde1	synapse defective 1, Rho GTPase, homolog 1 (C. elegans)
57342	ENSMUST00000126047	1.13129	0.0258203	UP	ENSMUSG00000030770	Q9EPC1	Parva	parvin, alpha [Source:MGI Symbol;Acc:MGI:1931144]
20452	ENSMUST00000189556	1.13409	0.0138477	UP	ENSMUSG00000040710	Q53WR7	St8sia4	ST8 alpha-N-acetyl-neuraminide alpha-2,8-sialyltransferase 4 [Source:MGI Symbol;Acc:MGI:106018]
26893	ENSMUST00000132639	1.136	0.0271617	UP	ENSMUSG00000019494	O88545	Cops6	COP9 signalosome complex subunit 6 [Source:UniProtKB/Swiss-Prot;Acc:O88545]
11421	ENSMUST00000001964	1.13603	0.0219784	UP	ENSMUSG00000020681	P09470	Ace	angiotensin I converting enzyme (peptidyl-dipeptidase A) 1 [Source:MGI Symbol;Acc:MGI:87874]
226251	ENSMUST00000133782	1.13783	0.0370941	UP	ENSMUSG00000025085	Q8K4G5	Ablim1	actin-binding LIM protein 1 [Source:MGI Symbol;Acc:MGI:1194500]
16847	ENSMUST00000102777	1.13805	0.00947364	UP	ENSMUSG00000057722	P48356	Lepr	Leptin receptor [Source:UniProtKB/Swiss-Prot;Acc:P48356]
17101	ENSMUST00000110559	1.13805	0.0368625	UP	ENSMUSG00000019726	G5E8Q0	Lyst	lysosomal trafficking regulator
327826	ENSMUST00000020381	1.13876	0.0156336	UP	ENSMUSG00000020170	Q8C180	Frs2	fibroblast growth factor receptor substrate 2
237886	ENSMUST00000138797	1.14361	0.0242848	UP	ENSMUSG00000069793	Q8CB82	Slfn9	schlafen 9
544817	ENSMUST00000116102	1.14489	0.04134	UP	ENSMUSG00000034255	A2AB59	Arhgap27	Rho GTPase activating protein 27 [Source:MGI Symbol;Acc:MGI:1916903]
277939	ENSMUST00000184753	1.14734	0.0128024	UP	ENSMUSG00000047248	Q52KB6	C2cd3	C2 domain-containing protein 3 [Source:UniProtKB/Swiss-Prot;Acc:Q52KB6]
652925	ENSMUST00000200542	1.1479	0.00192935	UP	ENSMUSG00000079659	B2RVB9	Tmem243	transmembrane protein 243, mitochondrial [Source:MGI Symbol;Acc:MGI:3606159]
208076	ENSMUST00000215175	1.1511	0.0265762	UP	ENSMUSG00000035934	Q8BG99	Pknox2	Homeobox protein PKNOX2 [Source:UniProtKB/Swiss-Prot;Acc:Q8BG99]
14268	ENSMUST00000189160	1.15286	0.00135005	UP	ENSMUSG00000026193	P11276	Fn1	Fibronectin Anastellin [Source:UniProtKB/Swiss-Prot;Acc:P11276]
69780	ENSMUST00000151615	1.1555	0.0491676	UP	ENSMUSG00000032870	Q7TN29	Smap2	small ArfGAP 2 [Source:MGI Symbol;Acc:MGI:1917030]
110351	ENSMUST00000151601	1.15747	0.0166473	UP	ENSMUSG00000041351	A2ALS5	Rap1gap	Mus musculus Rap1 GTPase-activating protein (Rap1gap), transcript variant 5, mRNA. [Source:RefSeq mRNA;Acc:NM_001331215]
320528	ENSMUST00000216856	1.15816	0.0478076	UP	ENSMUSG00000035284	A1ILG8	Vps13c	vacuolar protein sorting 13C [Source:MGI Symbol;Acc:MGI:2444207]
69538	ENSMUST00000205089	1.16192	0.043808	UP	ENSMUSG00000033420	Q9CZ52	Antxr1	Anthrax toxin receptor 1 [Source:UniProtKB/Swiss-Prot;Acc:Q9CZ52]
24117	ENSMUST00000020439	1.1643	0.00650255	UP	ENSMUSG00000020218	Q3TYU1	Wif1	Wnt inhibitory factor 1 [Source:MGI Symbol;Acc:MGI:1344332]
53609	ENSMUST00000208427	1.16439	0.0146897	UP	ENSMUSG00000061028	Q8CFC7	Clasrp	CLK4-associating serine/arginine rich protein [Source:UniProtKB/Swiss-Prot;Acc:Q8CFC7]
16149	ENSMUST00000097563	1.166	0.0129509	UP	ENSMUSG00000024610	Q545Y5	Cd74	CD74 antigen (invariant polypeptide of major histocompatibility complex, class II antigen-associated)
17692	ENSMUST00000129860	1.166	0.0113592	UP	ENSMUSG00000031358	Q9WVG9	Msl3	Male-specific lethal 3 homolog [Source:UniProtKB/Swiss-Prot;Acc:Q9WVG9]
338355	ENSMUST00000084528	1.16661	0.0275505	UP	ENSMUSG00000066151	Q6P9Q6	Fkbp15	FK506-binding protein 15 [Source:UniProtKB/Swiss-Prot;Acc:Q6P9Q6]
17979	ENSMUST00000139658	1.17282	0.0286063	UP	ENSMUSG00000027678	Q05BA5	Ncoa3	nuclear receptor coactivator 3 [Source:HGNC Symbol;Acc:HGNC:7670]
240283	ENSMUST00000181907	1.17338	0.026371	UP	ENSMUSG00000037416	Q6PNC0	Dmxl1	DmX-like protein 1 [Source:UniProtKB/Swiss-Prot;Acc:Q6PNC0]
71544	ENSMUST00000183182	1.17359	0.019389	UP	ENSMUSG00000050730	B2RQE8	Arhgap42	Rho GTPase activating protein 42 [Source:MGI Symbol;Acc:MGI:1918794]
18769	ENSMUST00000147385	1.17438	0.00757433	UP	ENSMUSG00000035268	Q3TP50	Pkig	cAMP-dependent protein kinase inhibitor gamma [Source:UniProtKB/Swiss-Prot;Acc:O70139]
83768	ENSMUST00000028332	1.17533	0.0260395	UP	ENSMUSG00000026958	Q9ET22	Dpp7	Dipeptidyl peptidase 2 [Source:UniProtKB/Swiss-Prot;Acc:Q9ET22]
227699	ENSMUST00000133603	1.1765	0.0464334	UP	ENSMUSG00000052533	Q6ZQH8	Nup188	Nucleoporin NUP188 homolog [Source:UniProtKB/Swiss-Prot;Acc:Q6ZQH8]
14462	ENSMUST00000102976	1.17813	0.0279529	UP	ENSMUSG00000015619	P23772	Gata3	Mus musculus GATA binding protein 3 (Gata3), transcript variant 3, mRNA. [Source:RefSeq mRNA;Acc:NM_001355111]
13132	ENSMUST00000161040	1.17878	0.0298714	UP	ENSMUSG00000022150	A0A0R4J104	Dab2	DAB2, clathrin adaptor protein [Source:HGNC Symbol;Acc:HGNC:2662]
66999	ENSMUST00000156481	1.17973	0.0420817	UP	ENSMUSG00000015804	Q920D3	Med28	Mediator of RNA polymerase II transcription subunit 28 [Source:UniProtKB/Swiss-Prot;Acc:Q920D3]
12316	ENSMUST00000053364	1.18015	0.00787842	UP	ENSMUSG00000033952	Q4G1G9	Aspm	Abnormal spindle-like microcephaly-associated protein homolog [Source:UniProtKB/Swiss-Prot;Acc:Q8CJ27]
12797	ENSMUST00000216872	1.18117	0.028155	UP	ENSMUSG00000001349	Q8CBQ2	Cnn1	Calponin-1 [Source:UniProtKB/Swiss-Prot;Acc:Q08091]
12062	ENSMUST00000001652	1.18291	0.048478	UP	ENSMUSG00000021070	P32299	Bdkrb2	bradykinin receptor, beta 2
70789	ENSMUST00000050511	1.18431	0.0344583	UP	ENSMUSG00000026866	A2ARD6	Kynu	kynureninase [Source:HGNC Symbol;Acc:HGNC:6469]
110380	ENSMUST00000101141	1.18663	0.017113	UP	ENSMUSG00000045180	A2ALU4	Shroom2	shroom family member 2 [Source:MGI Symbol;Acc:MGI:107194]
234730	ENSMUST00000212568	1.19029	0.0262786	UP	ENSMUSG00000033703	Q7TMC8	Fuk	L-fucose kinase [Source:UniProtKB/Swiss-Prot;Acc:Q7TMC8]
71941	ENSMUST00000211172	1.19303	0.0400818	UP	ENSMUSG00000056228	Q8BYM8	Cars2	cysteinyl-tRNA synthetase 2 (mitochondrial)(putative) [Source:MGI Symbol;Acc:MGI:1919191]
29819	ENSMUST00000162751	1.19696	0.0215438	UP	ENSMUSG00000025920	Q8CJ67	Stau2	staufen double-stranded RNA binding protein 2 [Source:MGI Symbol;Acc:MGI:1352508]
76799	ENSMUST00000102591	1.19704	0.0238536	UP	ENSMUSG00000028797	Q8R1E7	Tmem234	transmembrane protein 234 [Source:MGI Symbol;Acc:MGI:1924049]
70101	ENSMUST00000169591	1.20287	0.0342976	UP	ENSMUSG00000048440	Q99N17	Cyp4f16	cytochrome P450, family 4, subfamily f, polypeptide 16 [Source:MGI Symbol;Acc:MGI:1917351]
66970	ENSMUST00000144659	1.20479	0.022035	UP	ENSMUSG00000003992	Q9CYZ8	Ssbp2	Single-stranded DNA-binding protein 2 [Source:UniProtKB/Swiss-Prot;Acc:Q9CYZ8]
211896	ENSMUST00000028595	1.20521	0.0142085	UP	ENSMUSG00000027173	Q91WS7	Depdc7	DEP domain-containing protein 7 [Source:UniProtKB/Swiss-Prot;Acc:Q91WS7]
72789	ENSMUST00000182815	1.20545	0.0406509	UP	ENSMUSG00000027831	A1A535	Veph1	ventricular zone expressed PH domain-containing 1 [Source:MGI Symbol;Acc:MGI:1920039]
216848	ENSMUST00000146930	1.20722	0.00975725	UP	ENSMUSG00000018474	B1AR17	Chd3	chromodomain helicase DNA binding protein 3 [Source:MGI Symbol;Acc:MGI:1344395]
100504710	ENSMUST00000174143	1.21283	0.0191159	UP	ENSMUSG00000079495	Q9JIY8	Nat8f6	N-acetyltransferase 8 (GCN5-related) family member 6 [Source:MGI Symbol;Acc:MGI:3779382]
218756	ENSMUST00000224197	1.21392	0.0442562	UP	ENSMUSG00000021733	F8VQC9	Slc4a7	solute carrier family 4, sodium bicarbonate cotransporter, member 7
69940	ENSMUST00000202151	1.21409	0.0178039	UP	ENSMUSG00000036435	Q8R3S6	Exoc1	Mus musculus exocyst complex component 1 (Exoc1), transcript variant 5, mRNA. [Source:RefSeq mRNA;Acc:NM_001359372]
75974	ENSMUST00000145757	1.21504	0.00476329	UP	ENSMUSG00000031093	A2AF47	Dock11	Dedicator of cytokinesis protein 11 [Source:UniProtKB/Swiss-Prot;Acc:A2AF47]
73668	ENSMUST00000131503	1.2157	0.0224958	UP	ENSMUSG00000034848	Q0HA38	Ttc21b	tetratricopeptide repeat domain 21B [Source:MGI Symbol;Acc:MGI:1920918]
100683	ENSMUST00000136379	1.21612	0.00727415	UP	ENSMUSG00000045482	E9QLK7	Trrap	transformation/transcription domain associated protein [Source:HGNC Symbol;Acc:HGNC:12347]
59041	ENSMUST00000125778	1.21715	0.0447571	UP	ENSMUSG00000026277	Q3U6Y0	Stk25	Serine/threonine-protein kinase 25 [Source:UniProtKB/Swiss-Prot;Acc:Q9Z2W1]
70472	ENSMUST00000226526	1.21877	0.0208011	UP	ENSMUSG00000022360	G3X963	Atad2	ATPase family, AAA domain containing 2
17754	ENSMUST00000110639	1.21882	0.0287761	UP	ENSMUSG00000027254	Q9QYR6	Map1a	Microtubule-associated protein 1A MAP1A heavy chain MAP1 light chain LC2 [Source:UniProtKB/Swiss-Prot;Acc:Q9QYR6]
330119	ENSMUST00000061427	1.21915	0.0417175	UP	ENSMUSG00000043635	G3X9D2	Adamts3	a disintegrin-like and metallopeptidase (reprolysin type) with thrombospondin type 1 motif, 3 [Source:MGI Symbol;Acc:MGI:3045353]
54673	ENSMUST00000163279	1.22116	0.0174115	UP	ENSMUSG00000037062	Q9JK48	Sh3glb1	Endophilin-B1 [Source:UniProtKB/Swiss-Prot;Acc:Q9JK48]
76491	ENSMUST00000048527	1.22391	0.0442495	UP	ENSMUSG00000042073	E9QN99	Abhd14b	abhydrolase domain containing 14b [Source:MGI Symbol;Acc:MGI:1923741]
23792	ENSMUST00000087374	1.22604	0.018048	UP	ENSMUSG00000025964	Q9R1V7	Adam23	Disintegrin and metalloproteinase domain-containing protein 23 [Source:UniProtKB/Swiss-Prot;Acc:Q9R1V7]
192190	ENSMUST00000209244	1.23116	0.0053559	UP	ENSMUSG00000038725	Q80ZA4	Pkhd1l1	Fibrocystin-L [Source:UniProtKB/Swiss-Prot;Acc:Q80ZA4]
76917	ENSMUST00000024704	1.23337	0.0412824	UP	ENSMUSG00000023911	Q9CQE9	Flywch2	FLYWCH family member 2 [Source:UniProtKB/Swiss-Prot;Acc:Q9CQE9]
328133	ENSMUST00000219689	1.2336	0.0448826	UP	ENSMUSG00000048833	Q8BFU1	Slc39a9	solute carrier family 39 (zinc transporter), member 9
14268	ENSMUST00000186129	1.23713	0.0482164	UP	ENSMUSG00000026193	P11276	Fn1	Fibronectin Anastellin [Source:UniProtKB/Swiss-Prot;Acc:P11276]
19245	ENSMUST00000229339	1.23916	0.0356474	UP	ENSMUSG00000059895	Q9D658	Ptp4a3	protein tyrosine phosphatase 4a3
66977	ENSMUST00000111368	1.2398	0.0473284	UP	ENSMUSG00000026683	Q99P69	Nuf2	Mus musculus NUF2, NDC80 kinetochore complex component (Nuf2), transcript variant 2, mRNA. [Source:RefSeq mRNA;Acc:NM_001355159]
620393	ENSMUST00000133144	1.2399	0.0213681	UP	ENSMUSG00000087247	J3QPP8	Alkal1	ALK and LTK ligand 1 [Source:UniProtKB/Swiss-Prot;Acc:J3QPP8]
17155	ENSMUST00000146483	1.24156	0.036348	UP	ENSMUSG00000003746	P45700	Man1a	mannosidase 1, alpha [Source:MGI Symbol;Acc:MGI:104677]
11491	ENSMUST00000155115	1.24159	0.00665468	UP	ENSMUSG00000052593	Q9Z0F8	Adam17	Disintegrin and metalloproteinase domain-containing protein 17 [Source:UniProtKB/Swiss-Prot;Acc:Q9Z0F8]
68366	ENSMUST00000125527	1.24201	0.0334974	UP	ENSMUSG00000019295	Q8K304	Tmem129	E3 ubiquitin-protein ligase TM129 [Source:UniProtKB/Swiss-Prot;Acc:Q8K304]
23832	ENSMUST00000182350	1.24283	0.022214	UP	ENSMUSG00000060509	S4R1K3	Xcr1	chemokine (C motif) receptor 1 [Source:MGI Symbol;Acc:MGI:1346338]
17060	ENSMUST00000134568	1.2432	0.00780538	UP	ENSMUSG00000061132	Q9QUN3	Blnk	B-cell linker protein [Source:UniProtKB/Swiss-Prot;Acc:Q9QUN3]
217198	ENSMUST00000156320	1.25304	0.0432722	UP	ENSMUSG00000035172	Q8VCE9	Plekhh3	Mus musculus pleckstrin homology domain containing, family H (with MyTH4 domain) member 3 (Plekhh3), transcript variant 2, mRNA. [Source:RefSeq mRNA;Acc:NM_001346769]
381812	ENSMUST00000212051	1.25439	0.0189538	UP	ENSMUSG00000061414	Q3UP38	Cracr2a	EF-hand calcium-binding domain-containing protein 4B [Source:UniProtKB/Swiss-Prot;Acc:Q3UP38]
23885	ENSMUST00000135880	1.25729	0.03382	UP	ENSMUSG00000001157	Q920G9	Gmcl1	germ cell-less, spermatogenesis associated 1 [Source:MGI Symbol;Acc:MGI:1345156]
234729	ENSMUST00000213015	1.25803	0.0150787	UP	ENSMUSG00000010936	Q80WQ2	Vac14	Vac14 homolog (S. cerevisiae) [Source:MGI Symbol;Acc:MGI:2157980]
12143	ENSMUST00000224965	1.2607	0.0449239	UP	ENSMUSG00000014453	P16277	Blk	B lymphoid kinase
66532	ENSMUST00000036194	1.26298	0.0235978	UP	ENSMUSG00000040121	Q9D7T1	Rep15	Rab15 effector protein [Source:UniProtKB/Swiss-Prot;Acc:Q9D7T1]
109135	ENSMUST00000204528	1.26555	0.0350801	UP	ENSMUSG00000030231	E9Q6H8	Plekha5	pleckstrin homology domain containing A5 [Source:HGNC Symbol;Acc:HGNC:30036]
170786	ENSMUST00000012847	1.26594	0.034124	UP	ENSMUSG00000031494	Q91ZX1	Cd209a	CD209 antigen-like protein A [Source:UniProtKB/Swiss-Prot;Acc:Q91ZX1]
52348	ENSMUST00000098817	1.26808	0.0103627	UP	ENSMUSG00000031600	Q3UV99	Vps37a	vacuolar protein sorting 37A
50915	ENSMUST00000145603	1.26997	0.00675505	UP	ENSMUSG00000026888	A2ASX2	Grb14	Growth factor receptor-bound protein 14 [Source:UniProtKB/Swiss-Prot;Acc:Q9JLM9]
24056	ENSMUST00000091903	1.27101	0.00498407	UP	ENSMUSG00000021892	Q9Z131	Sh3bp5	SH3-domain binding protein 5 (BTK-associated) [Source:MGI Symbol;Acc:MGI:1344391]
16970	ENSMUST00000143631	1.27259	0.0152824	UP	ENSMUSG00000030263	Q60664	Lrmp	lymphoid-restricted membrane protein isoform 2 [Source:RefSeq peptide;Acc:NP_001268910]
74026	ENSMUST00000037915	1.27305	0.018331	UP	ENSMUSG00000052915	Q6PDM1	Msl1	Male-specific lethal 1 homolog [Source:UniProtKB/Swiss-Prot;Acc:Q6PDM1]
17948	ENSMUST00000117913	1.2753	0.0365047	UP	ENSMUSG00000078945	Q9QUK4	Naip2	NLR family, apoptosis inhibitory protein 2 [Source:MGI Symbol;Acc:MGI:1298226]
-	ENSMUST00000225486	1.27917	0.0118604	UP	ENSMUSG00000114470	-	AC175538.1	-
74148	ENSMUST00000128155	1.2794	0.0365114	UP	ENSMUSG00000020741	Q5SW19	Cluh	clustered mitochondria homolog [Source:HGNC Symbol;Acc:HGNC:29094]
68795	ENSMUST00000126165	1.2816	0.0251251	UP	ENSMUSG00000044308	Q5U430	Ubr3	ubiquitin protein ligase E3 component n-recognin 3 [Source:MGI Symbol;Acc:MGI:1861100]
217558	ENSMUST00000152236	1.28356	0.0166078	UP	ENSMUSG00000035293	Q5RJY2	G2e3	G2/M phase-specific E3 ubiquitin-protein ligase [Source:UniProtKB/Swiss-Prot;Acc:Q5RJY2]
27401	ENSMUST00000096482	1.28396	0.0268181	UP	ENSMUSG00000054115	Q569Z9	Skp2	S-phase kinase-associated protein 2 (p45) [Source:MGI Symbol;Acc:MGI:1351663]
231051	ENSMUST00000172707	1.28412	0.0245853	UP	ENSMUSG00000038056	F8WI37	Kmt2c	lysine methyltransferase 2C [Source:HGNC Symbol;Acc:HGNC:13726]
16154	ENSMUST00000034594	1.28562	0.0318636	UP	ENSMUSG00000032089	Q3UDV8	Il10ra	Interleukin-10 receptor subunit alpha [Source:UniProtKB/Swiss-Prot;Acc:Q61727]
72958	ENSMUST00000180507	1.28723	0.00733243	UP	ENSMUSG00000090659	E9Q1L8	Zfp493	zinc finger protein 493 [Source:MGI Symbol;Acc:MGI:1920208]
235050	ENSMUST00000217563	1.2905	0.0268222	UP	ENSMUSG00000066829	Q99K45	Zfp810	zinc finger protein 810 [Source:MGI Symbol;Acc:MGI:2384563]
14538	ENSMUST00000110191	1.29098	0.0434697	UP	ENSMUSG00000021360	P97402	Gcnt2	glucosaminyl (N-acetyl) transferase 2, I-branching enzyme
20877	ENSMUST00000021277	1.29146	0.0297749	UP	ENSMUSG00000020897	O70126	Aurkb	Aurora kinase B [Source:UniProtKB/Swiss-Prot;Acc:O70126]
244418	ENSMUST00000150295	1.29274	0.0368773	UP	ENSMUSG00000050271	E9QLH9	Prag1	PEAK1 related, kinase-activating pseudokinase 1 [Source:HGNC Symbol;Acc:HGNC:25438]
100504518	ENSMUST00000096038	1.29399	0.027381	UP	ENSMUSG00000071540	D3Z1D3	3425401B19Rik	RIKEN cDNA 3425401B19 gene
27406	ENSMUST00000148679	1.29507	0.0477671	UP	ENSMUSG00000003234	Q8K268	Abcf3	ATP-binding cassette, sub-family F (GCN20), member 3 [Source:MGI Symbol;Acc:MGI:1351656]
223701	ENSMUST00000145779	1.29864	0.0160432	UP	ENSMUSG00000042292	Q8K4J6	Mkl1	MKL/myocardin-like protein 1 [Source:UniProtKB/Swiss-Prot;Acc:Q8K4J6]
67785	ENSMUST00000151026	1.29939	0.0473756	UP	ENSMUSG00000042446	A2A791	Zmym4	zinc finger, MYM-type 4 [Source:MGI Symbol;Acc:MGI:1915035]
69993	ENSMUST00000114403	1.30382	0.0416357	UP	ENSMUSG00000004633	Q3V2R3	Chn2	Beta-chimaerin [Source:UniProtKB/Swiss-Prot;Acc:Q80XD1]
73744	ENSMUST00000159496	1.30728	0.0430296	UP	ENSMUSG00000032295	Q91W89	Man2c1	Alpha-mannosidase 2C1 [Source:UniProtKB/Swiss-Prot;Acc:Q91W89]
18787	ENSMUST00000199832	1.30832	0.0349252	UP	ENSMUSG00000037411	G5E899	Serpine1	serine (or cysteine) peptidase inhibitor, clade E, member 1 [Source:MGI Symbol;Acc:MGI:97608]
234889	ENSMUST00000212705	1.31171	0.0205215	UP	ENSMUSG00000041624	F8VQK3	Gucy1a2	guanylate cyclase 1 soluble subunit alpha 2 [Source:HGNC Symbol;Acc:HGNC:4684]
242248	ENSMUST00000041577	1.31326	0.0107451	UP	ENSMUSG00000037922	Q80VH0	Bank1	B-cell scaffold protein with ankyrin repeats [Source:UniProtKB/Swiss-Prot;Acc:Q80VH0]
21898	ENSMUST00000048096	1.31348	0.0343813	UP	ENSMUSG00000039005	Q9QUK6	Tlr4	toll-like receptor 4 [Source:MGI Symbol;Acc:MGI:96824]
60596	ENSMUST00000193924	1.31746	0.0245923	UP	ENSMUSG00000033910	Q9ERL9	Gucy1a1	guanylate cyclase 1, soluble, alpha 1 [Source:MGI Symbol;Acc:MGI:1926562]
70713	ENSMUST00000227086	1.31778	0.0194749	UP	ENSMUSG00000049092	E9Q343	Gpr137c	G protein-coupled receptor 137C [Source:HGNC Symbol;Acc:HGNC:25445]
50530	ENSMUST00000126357	1.31873	0.00333328	UP	ENSMUSG00000030116	Q9QZJ6	Mfap5	Microfibrillar-associated protein 5 [Source:UniProtKB/Swiss-Prot;Acc:Q9QZJ6]
59049	ENSMUST00000228249	1.32214	0.0336677	UP	ENSMUSG00000022199	Q9D9E0	Slc22a17	solute carrier family 22 (organic cation transporter), member 17
50767	ENSMUST00000208006	1.32373	0.045693	UP	ENSMUSG00000004565	A0A140LI54	Pnpla6	Mus musculus patatin-like phospholipase domain containing 6 (Pnpla6), transcript variant 4, mRNA. [Source:RefSeq mRNA;Acc:NM_001359122]
21402	ENSMUST00000116595	1.32491	0.0476779	UP	ENSMUSG00000036309	Q9WTX5	Skp1a	S-phase kinase-associated protein 1A [Source:MGI Symbol;Acc:MGI:103575]
434178	ENSMUST00000173439	1.32517	0.0328261	UP	ENSMUSG00000092416	G3UY09	Zfp141	zinc finger protein 141 [Source:MGI Symbol;Acc:MGI:3584269]
66938	ENSMUST00000141638	1.32529	0.0294881	UP	ENSMUSG00000073758	Q9D9T7	Sh3d21	SH3 domain containing 21 [Source:MGI Symbol;Acc:MGI:1914188]
26886	ENSMUST00000075550	1.33006	0.0491767	UP	ENSMUSG00000045273	Q9QYM8	Cenph	Centromere protein H [Source:UniProtKB/Swiss-Prot;Acc:Q9QYM8]
319660	ENSMUST00000160390	1.33103	0.0426485	UP	ENSMUSG00000050103	Q8BS35	Agmo	Alkylglycerol monooxygenase [Source:UniProtKB/Swiss-Prot;Acc:Q8BS35]
22321	ENSMUST00000173911	1.33191	0.0387154	UP	ENSMUSG00000007029	Q790I0	Vars	valyl-tRNA synthetase [Source:MGI Symbol;Acc:MGI:90675]
214580	ENSMUST00000124672	1.33351	0.00926977	UP	ENSMUSG00000063179	Q8BP74	Pstk	L-seryl-tRNA(Sec) kinase [Source:UniProtKB/Swiss-Prot;Acc:Q8BP74]
50496	ENSMUST00000020908	1.33584	0.0110431	UP	ENSMUSG00000057469	O54917	E2f6	E2F transcription factor 6
70551	ENSMUST00000228661	1.33741	0.0229933	UP	ENSMUSG00000041594	Q8BG19	Tmtc4	Transmembrane and TPR repeat-containing protein 4 [Source:UniProtKB/Swiss-Prot;Acc:Q8BG19]
234673	ENSMUST00000034355	1.34046	0.00885143	UP	ENSMUSG00000031886	Q8BK48	Ces2e	Pyrethroid hydrolase Ces2e [Source:UniProtKB/Swiss-Prot;Acc:Q8BK48]
109129	ENSMUST00000144143	1.34174	0.0230693	UP	ENSMUSG00000026766	Q99LS1	Mmadhc	Methylmalonic aciduria and homocystinuria type D homolog, mitochondrial [Source:UniProtKB/Swiss-Prot;Acc:Q99LS1]
218699	ENSMUST00000224462	1.34716	0.04943	UP	ENSMUSG00000033885	Q8BX57	Pxk	PX domain containing serine/threonine kinase
15525	ENSMUST00000151854	1.34975	0.0246227	UP	ENSMUSG00000020361	Q3U2G2	Hspa4	heat shock protein 4 [Source:MGI Symbol;Acc:MGI:1342292]
56758	ENSMUST00000099087	1.353	0.0367033	UP	ENSMUSG00000027763	Q3U581	Mbnl1	Muscleblind-like protein 1 [Source:UniProtKB/Swiss-Prot;Acc:Q9JKP5]
63985	ENSMUST00000111817	1.35962	0.034012	UP	ENSMUSG00000062014	Q9CQI3	Gmfb	glia maturation factor, beta [Source:MGI Symbol;Acc:MGI:1927133]
72475	ENSMUST00000131111	1.35973	0.0160043	UP	ENSMUSG00000061887	Q9D032	Ssbp3	Single-stranded DNA-binding protein 3 [Source:UniProtKB/Swiss-Prot;Acc:Q9D032]
12482	ENSMUST00000187379	1.36075	0.0133981	UP	ENSMUSG00000024673	Q542S5	Ms4a1	membrane-spanning 4-domains, subfamily A, member 1 [Source:MGI Symbol;Acc:MGI:88321]
57028	ENSMUST00000231057	1.36494	0.035925	UP	ENSMUSG00000022436	Q6IS27	Sh3bp1	pyridoxal (pyridoxine, vitamin B6) phosphatase
229599	ENSMUST00000159739	1.36595	0.0181313	UP	ENSMUSG00000038550	A2RTE4	Ciart	Circadian-associated transcriptional repressor [Source:UniProtKB/Swiss-Prot;Acc:Q3TQ03]
241494	ENSMUST00000128583	1.36702	0.00944248	UP	ENSMUSG00000027016	Q8BXJ8	Zfp385b	zinc finger protein 385B [Source:MGI Symbol;Acc:MGI:2444734]
13400	ENSMUST00000140742	1.3679	0.0117989	UP	ENSMUSG00000030409	P54265	Dmpk	Myotonin-protein kinase [Source:UniProtKB/Swiss-Prot;Acc:P54265]
19216	ENSMUST00000159935	1.37293	0.0081404	UP	ENSMUSG00000019464	P35375	Ptger1	Prostaglandin E2 receptor EP1 subtype [Source:UniProtKB/Swiss-Prot;Acc:P35375]
50874	ENSMUST00000149898	1.3747	0.0191722	UP	ENSMUSG00000005628	Q3UN19	Tmod4	tropomodulin 4 [Source:MGI Symbol;Acc:MGI:1355285]
215114	ENSMUST00000201479	1.38869	0.00468515	UP	ENSMUSG00000039959	Q8VD75	Hip1	Huntingtin-interacting protein 1 [Source:UniProtKB/Swiss-Prot;Acc:Q8VD75]
53623	ENSMUST00000076349	1.38884	0.0284851	UP	ENSMUSG00000001986	Q0VGS8	Gria3	Mus musculus glutamate receptor, ionotropic, AMPA3 (alpha 3) (Gria3), transcript variant 5, mRNA. [Source:RefSeq mRNA;Acc:NM_001358361]
12421	ENSMUST00000027040	1.38947	0.0145325	UP	ENSMUSG00000025907	Q9ESK9	Rb1cc1	RB1-inducible coiled-coil protein 1 [Source:UniProtKB/Swiss-Prot;Acc:Q9ESK9]
110094	ENSMUST00000112376	1.39137	0.00722046	UP	ENSMUSG00000031295	Q8BWJ3	Phka2	Phosphorylase b kinase regulatory subunit alpha, liver isoform [Source:UniProtKB/Swiss-Prot;Acc:Q8BWJ3]
14130	ENSMUST00000160106	1.39401	0.0194899	UP	ENSMUSG00000026656	A0A0B4J1G1	Fcgr2b	Fc receptor, IgG, low affinity IIb
11549	ENSMUST00000160647	1.39418	0.0123694	UP	ENSMUSG00000045875	P97718	Adra1a	Alpha-1A adrenergic receptor [Source:UniProtKB/Swiss-Prot;Acc:P97718]
52668	ENSMUST00000148824	1.40014	0.010372	UP	ENSMUSG00000064215	Q8C6G0	Ifi27	interferon, alpha-inducible protein 27
210293	ENSMUST00000187698	1.40107	0.00420039	UP	ENSMUSG00000038608	A0A087WQ86	Dock10	dedicator of cytokinesis 10 [Source:HGNC Symbol;Acc:HGNC:23479]
241062	ENSMUST00000187949	1.40118	0.0187681	UP	ENSMUSG00000073678	Q3UUQ7	Pgap1	GPI inositol-deacylase [Source:UniProtKB/Swiss-Prot;Acc:Q3UUQ7]
74204	ENSMUST00000167268	1.40276	0.018097	UP	ENSMUSG00000000131	Q924Z6	Xpo6	exportin 6 [Source:MGI Symbol;Acc:MGI:2429950]
330460	ENSMUST00000086363	1.40293	0.0106348	UP	ENSMUSG00000046456	Q8R218	Tmem150b	Modulator of macroautophagy TMEM150B [Source:UniProtKB/Swiss-Prot;Acc:Q8R218]
98685	ENSMUST00000189655	1.40339	0.00295638	UP	ENSMUSG00000053286	A2RSY6	Trmt1l	Mus musculus tRNA methyltransferase 1 like (Trmt1l), transcript variant 3, mRNA. [Source:RefSeq mRNA;Acc:NM_001357570]
109359	ENSMUST00000138436	1.40421	0.00345244	UP	ENSMUSG00000030965	Z4YJY0	Abraxas2	BRISC complex subunit [Source:MGI Symbol;Acc:MGI:1926116]
53972	ENSMUST00000168235	1.40991	0.0296775	UP	ENSMUSG00000026259	E9QK62	Ngef	Ephexin-1 [Source:UniProtKB/Swiss-Prot;Acc:Q8CHT1]
16970	ENSMUST00000135191	1.4107	0.0482052	UP	ENSMUSG00000030263	Q60664	Lrmp	lymphoid-restricted membrane protein isoform 2 [Source:RefSeq peptide;Acc:NP_001268910]
208164	ENSMUST00000051176	1.41196	0.00632112	UP	ENSMUSG00000047420	Q8BR21	Fam180a	Protein FAM180A [Source:UniProtKB/Swiss-Prot;Acc:Q8BR21]
100039795	ENSMUST00000111416	1.41515	0.00645198	UP	ENSMUSG00000040612	B5TVM2	Ildr2	Immunoglobulin-like domain-containing receptor 2 [Source:UniProtKB/Swiss-Prot;Acc:B5TVM2]
56289	ENSMUST00000144129	1.41662	0.033645	UP	ENSMUSG00000010067	Q99MK9	Rassf1	Ras association (RalGDS/AF-6) domain family member 1 [Source:MGI Symbol;Acc:MGI:1928386]
53623	ENSMUST00000156721	1.41726	0.000871902	UP	ENSMUSG00000001986	Q0VGS8	Gria3	Mus musculus glutamate receptor, ionotropic, AMPA3 (alpha 3) (Gria3), transcript variant 5, mRNA. [Source:RefSeq mRNA;Acc:NM_001358361]
53325	ENSMUST00000174327	1.41819	0.047436	UP	ENSMUSG00000025316	Q8VBU8	Banp	Protein BANP [Source:UniProtKB/Swiss-Prot;Acc:Q8VBU8]
381810	ENSMUST00000171989	1.42004	0.0204086	UP	ENSMUSG00000067714	G3X9K0	Lpar5	lysophosphatidic acid receptor 5 [Source:HGNC Symbol;Acc:HGNC:13307]
20305	ENSMUST00000150243	1.42091	0.0186639	UP	ENSMUSG00000018927	P27784	Ccl6	C-C motif chemokine 6 CCL6(22-95) CCL6(23-95) [Source:UniProtKB/Swiss-Prot;Acc:P27784]
20163	ENSMUST00000131226	1.42212	0.00413213	UP	ENSMUSG00000026727	Q9D031	Rsu1	Ras suppressor protein 1 [Source:MGI Symbol;Acc:MGI:103040]
66897	ENSMUST00000163486	1.42619	0.0432454	UP	ENSMUSG00000022020	Q9DBB4	Naa16	N-alpha-acetyltransferase 16, NatA auxiliary subunit [Source:UniProtKB/Swiss-Prot;Acc:Q9DBB4]
66129	ENSMUST00000222570	1.42637	0.0191952	UP	ENSMUSG00000021482	Q9D1A0	Aaed1	AhpC/TSA antioxidant enzyme domain containing 1
19400	ENSMUST00000050323	1.42819	0.041091	UP	ENSMUSG00000002104	P12672	Rapsn	43 kDa receptor-associated protein of the synapse [Source:UniProtKB/Swiss-Prot;Acc:P12672]
28006	ENSMUST00000204495	1.42845	0.00679416	UP	ENSMUSG00000024104	Q6PGL7	Washc2	WASH complex subunit 2` [Source:MGI Symbol;Acc:MGI:106463]
14064	ENSMUST00000022182	1.42978	0.0288618	UP	ENSMUSG00000021675	O08675	F2rl2	Proteinase-activated receptor 3 [Source:UniProtKB/Swiss-Prot;Acc:O08675]
12273	ENSMUST00000168818	1.43201	0.00850117	UP	ENSMUSG00000049130	P30993	C5ar1	C5a anaphylatoxin chemotactic receptor 1 [Source:UniProtKB/Swiss-Prot;Acc:P30993]
67590	ENSMUST00000025981	1.43573	0.00738593	UP	ENSMUSG00000025008	Q8R2Q6	Tctn3	Tectonic-3 [Source:UniProtKB/Swiss-Prot;Acc:Q8R2Q6]
224170	ENSMUST00000133377	1.43772	0.0113013	UP	ENSMUSG00000064061	E9QNZ2	Dzip3	E3 ubiquitin-protein ligase DZIP3 [Source:UniProtKB/Swiss-Prot;Acc:Q7TPV2]
13170	ENSMUST00000211748	1.43803	0.010226	UP	ENSMUSG00000059824	Q60925	Dbp	D site-binding protein [Source:UniProtKB/Swiss-Prot;Acc:Q60925]
17069	ENSMUST00000051698	1.4425	0.0395747	UP	ENSMUSG00000022587	Q99JA5	Ly6e	lymphocyte antigen 6 family member E [Source:HGNC Symbol;Acc:HGNC:6727]
72587	ENSMUST00000176466	1.45857	0.0261539	UP	ENSMUSG00000029647	Q640Q5	Pan3	PAN2-PAN3 deadenylation complex subunit Pan3 [Source:UniProtKB/Swiss-Prot;Acc:Q640Q5]
20411	ENSMUST00000225306	1.45874	0.0249133	UP	ENSMUSG00000025006	E9QNA7	Sorbs1	sorbin and SH3 domain containing 1
13478	ENSMUST00000054708	1.45879	0.0466593	UP	ENSMUSG00000032123	P42867	Dpagt1	UDP-N-acetylglucosamine--dolichyl-phosphate N-acetylglucosaminephosphotransferase [Source:UniProtKB/Swiss-Prot;Acc:P42867]
12750	ENSMUST00000093132	1.4615	0.00460353	UP	ENSMUSG00000020385	Q4FJV9	Clk4	Dual specificity protein kinase CLK4 [Source:UniProtKB/Swiss-Prot;Acc:O35493]
208748	ENSMUST00000048790	1.46205	0.00614834	UP	ENSMUSG00000033361	Q6PAQ9	Prrg3	Transmembrane gamma-carboxyglutamic acid protein 3 [Source:UniProtKB/Swiss-Prot;Acc:Q6PAQ9]
319660	ENSMUST00000159998	1.46255	0.0166918	UP	ENSMUSG00000050103	Q8BS35	Agmo	Alkylglycerol monooxygenase [Source:UniProtKB/Swiss-Prot;Acc:Q8BS35]
12616	ENSMUST00000089510	1.4635	0.0286288	UP	ENSMUSG00000068267	P27790	Cenpb	Major centromere autoantigen B [Source:UniProtKB/Swiss-Prot;Acc:P27790]
140500	ENSMUST00000131168	1.46463	0.0331347	UP	ENSMUSG00000029033	Q6NXL5	Acap3	ArfGAP with coiled-coil, ankyrin repeat and PH domains 3 [Source:MGI Symbol;Acc:MGI:2153589]
233545	ENSMUST00000206611	1.46601	0.00668634	UP	ENSMUSG00000035401	Q8BMB0	Emsy	BRCA2-interacting transcriptional repressor EMSY [Source:UniProtKB/Swiss-Prot;Acc:Q8BMB0]
70713	ENSMUST00000146150	1.46679	0.0120038	UP	ENSMUSG00000049092	E9Q343	Gpr137c	G protein-coupled receptor 137C [Source:HGNC Symbol;Acc:HGNC:25445]
68606	ENSMUST00000027373	1.46696	0.00886128	UP	ENSMUSG00000026181	Q8CGA0	Ppm1f	Protein phosphatase 1F [Source:UniProtKB/Swiss-Prot;Acc:Q8CGA0]
232288	ENSMUST00000126899	1.46825	0.0358396	UP	ENSMUSG00000030064	Q920B0	Frmd4b	Mus musculus FERM domain containing 4B (Frmd4b), transcript variant 2, mRNA. [Source:RefSeq mRNA;Acc:NM_001346639]
19258	ENSMUST00000064091	1.47129	0.0355242	UP	ENSMUSG00000026384	Q9WU22	Ptpn4	Tyrosine-protein phosphatase non-receptor type 4 [Source:UniProtKB/Swiss-Prot;Acc:Q9WU22]
232414	ENSMUST00000058352	1.47326	0.00123159	UP	ENSMUSG00000046080	Q8BRU4	Clec9a	C-type lectin domain family 9 member A [Source:UniProtKB/Swiss-Prot;Acc:Q8BRU4]
53609	ENSMUST00000207253	1.47405	0.00673608	UP	ENSMUSG00000061028	Q8CFC7	Clasrp	CLK4-associating serine/arginine rich protein [Source:UniProtKB/Swiss-Prot;Acc:Q8CFC7]
68316	ENSMUST00000113897	1.4743	0.0164513	UP	ENSMUSG00000079508	Q9DCZ4	Apoo	MICOS complex subunit Mic26 [Source:UniProtKB/Swiss-Prot;Acc:Q9DCZ4]
94184	ENSMUST00000154150	1.47468	0.00111066	UP	ENSMUSG00000022680	Q99K01	Pdxdc1	pyridoxal-dependent decarboxylase domain containing 1 [Source:MGI Symbol;Acc:MGI:1920909]
102443350	ENSMUST00000153176	1.47704	0.0267116	UP	ENSMUSG00000099481	E9PVR2	Xndc1	Xrcc1 N-terminal domain containing 1 [Source:MGI Symbol;Acc:MGI:5546359]
93742	ENSMUST00000108752	1.47782	0.0350582	UP	ENSMUSG00000025812	Q99NH2	Pard3	par-3 family cell polarity regulator [Source:MGI Symbol;Acc:MGI:2135608]
76843	ENSMUST00000193977	1.47806	0.0138159	UP	ENSMUSG00000037474	Q3TLR7	Dtl	Denticleless protein homolog [Source:UniProtKB/Swiss-Prot;Acc:Q3TLR7]
103711	ENSMUST00000153896	1.47983	0.045876	UP	ENSMUSG00000018659	Q91XF0	Pnpo	Pyridoxine-5'-phosphate oxidase [Source:UniProtKB/Swiss-Prot;Acc:Q91XF0]
100042480	ENSMUST00000125115	1.48438	0.0326664	UP	ENSMUSG00000079481	E9Q0V6	Nhsl2	NHS like 2 [Source:HGNC Symbol;Acc:HGNC:33737]
227619	ENSMUST00000131826	1.48438	0.0287295	UP	ENSMUSG00000036646	A2AJ15	Man1b1	Endoplasmic reticulum mannosyl-oligosaccharide 1,2-alpha-mannosidase [Source:UniProtKB/Swiss-Prot;Acc:A2AJ15]
106512	ENSMUST00000038244	1.48462	0.0200605	UP	ENSMUSG00000034786	Q0VGT5	Gpsm3	G-protein signalling modulator 3 (AGS3-like, C. elegans) [Source:MGI Symbol;Acc:MGI:2146785]
21677	ENSMUST00000209708	1.4859	0.0256533	UP	ENSMUSG00000030796	P48301	Tead2	TEA domain family member 2 [Source:MGI Symbol;Acc:MGI:104904]
72475	ENSMUST00000137786	1.48645	0.00909361	UP	ENSMUSG00000061887	Q9D032	Ssbp3	Single-stranded DNA-binding protein 3 [Source:UniProtKB/Swiss-Prot;Acc:Q9D032]
16590	ENSMUST00000151357	1.48673	0.0471648	UP	ENSMUSG00000005672	P05532	Kit	Mast/stem cell growth factor receptor Kit [Source:UniProtKB/Swiss-Prot;Acc:P05532]
16847	ENSMUST00000037552	1.48977	0.0119999	UP	ENSMUSG00000057722	P48356	Lepr	Leptin receptor [Source:UniProtKB/Swiss-Prot;Acc:P48356]
227648	ENSMUST00000114082	1.49315	0.00889457	UP	ENSMUSG00000026924	Q80U43	Sec16a	SEC16 homolog A, endoplasmic reticulum export factor [Source:HGNC Symbol;Acc:HGNC:29006]
18671	ENSMUST00000138138	1.49369	0.0370833	UP	ENSMUSG00000040584	P21447	Abcb1a	Multidrug resistance protein 1A [Source:UniProtKB/Swiss-Prot;Acc:P21447]
242509	ENSMUST00000176264	1.49376	0.0209598	UP	ENSMUSG00000028487	Q2TBA4	Bnc2	Zinc finger protein basonuclin-2 [Source:UniProtKB/Swiss-Prot;Acc:Q8BMQ3]
67092	ENSMUST00000028624	1.49522	0.0478018	UP	ENSMUSG00000027199	Q9D964	Gatm	Glycine amidinotransferase, mitochondrial [Source:UniProtKB/Swiss-Prot;Acc:Q9D964]
14225	ENSMUST00000044011	1.49865	0.00253901	UP	ENSMUSG00000032966	P26883	Fkbp1a	Peptidyl-prolyl cis-trans isomerase FKBP1A [Source:UniProtKB/Swiss-Prot;Acc:P26883]
76582	ENSMUST00000190794	1.49918	0.0460819	UP	ENSMUSG00000042590	Q8K2V6	Ipo11	Importin-11 [Source:UniProtKB/Swiss-Prot;Acc:Q8K2V6]
67246	ENSMUST00000100765	1.50106	0.00667788	UP	ENSMUSG00000032712	B2KFD2	2810474O19Rik	RIKEN cDNA 2810474O19 gene [Source:MGI Symbol;Acc:MGI:1914496]
227929	ENSMUST00000146545	1.5016	0.00822649	UP	ENSMUSG00000026832	Q91VY6	Cytip	Cytohesin-interacting protein [Source:UniProtKB/Swiss-Prot;Acc:Q91VY6]
214150	ENSMUST00000069097	1.50567	0.0106245	UP	ENSMUSG00000028842	Q8CJF9	Ago3	Protein argonaute-3 [Source:UniProtKB/Swiss-Prot;Acc:Q8CJF9]
26888	ENSMUST00000041779	1.50657	0.00718695	UP	ENSMUSG00000030148	Q9QZ15	Clec4a2	C-type lectin domain family 4 member A [Source:UniProtKB/Swiss-Prot;Acc:Q9QZ15]
78825	ENSMUST00000069568	1.50787	0.0321559	UP	ENSMUSG00000026502	Q8BIB9	Desi2	Desumoylating isopeptidase 2 [Source:UniProtKB/Swiss-Prot;Acc:Q9D291]
14268	ENSMUST00000185408	1.50793	8.14989e-05	UP	ENSMUSG00000026193	P11276	Fn1	Fibronectin Anastellin [Source:UniProtKB/Swiss-Prot;Acc:P11276]
232879	ENSMUST00000051390	1.50897	0.0401057	UP	ENSMUSG00000049600	Q52KG4	Zbtb45	zinc finger and BTB domain containing 45 [Source:MGI Symbol;Acc:MGI:2685003]
14025	ENSMUST00000109514	1.51254	0.00470517	UP	ENSMUSG00000000861	Q9QYE3	Bcl11a	B-cell lymphoma/leukemia 11A [Source:UniProtKB/Swiss-Prot;Acc:Q9QYE3]
20239	ENSMUST00000199451	1.51396	0.0273405	UP	ENSMUSG00000042605	O70305	Atxn2	ataxin 2 [Source:HGNC Symbol;Acc:HGNC:10555]
99011	ENSMUST00000129163	1.51499	0.029766	UP	ENSMUSG00000039254	Q8R2R1	Pomt1	Protein O-mannosyl-transferase 1 [Source:UniProtKB/Swiss-Prot;Acc:Q8R2R1]
14080	ENSMUST00000067492	1.51511	0.0458987	UP	ENSMUSG00000054422	P12710	Fabp1	Fatty acid-binding protein, liver [Source:UniProtKB/Swiss-Prot;Acc:P12710]
75317	ENSMUST00000048518	1.52018	0.00628458	UP	ENSMUSG00000035365	Q6IRT3	Parpbp	PARP1 binding protein [Source:HGNC Symbol;Acc:HGNC:26074]
68728	ENSMUST00000174685	1.52131	0.0196206	UP	ENSMUSG00000038375	Q8CFU8	Trp53inp2	Tumor protein p53-inducible nuclear protein 2 [Source:UniProtKB/Swiss-Prot;Acc:Q8CFU8]
53893	ENSMUST00000128604	1.52245	0.0206462	UP	ENSMUSG00000025817	Q9JKX6	Nudt5	ADP-sugar pyrophosphatase [Source:UniProtKB/Swiss-Prot;Acc:Q9JKX6]
70428	ENSMUST00000077175	1.52609	0.0054362	UP	ENSMUSG00000034453	P59470	Polr3b	DNA-directed RNA polymerase III subunit RPC2 [Source:UniProtKB/Swiss-Prot;Acc:P59470]
12879	ENSMUST00000172771	1.52891	0.0158513	UP	ENSMUSG00000062563	A0A0R4J216	Cys1	cystin 1 [Source:HGNC Symbol;Acc:HGNC:18525]
320244	ENSMUST00000110220	1.53097	0.0127801	UP	ENSMUSG00000012609	Q8CHB8	Ttll5	tubulin tyrosine ligase-like family, member 5 [Source:MGI Symbol;Acc:MGI:2443657]
233038	ENSMUST00000057974	1.53111	0.0161494	UP	ENSMUSG00000047586	G3X9C2	Nccrp1	non-specific cytotoxic cell receptor protein 1 homolog (zebrafish) [Source:MGI Symbol;Acc:MGI:2685009]
66129	ENSMUST00000220895	1.53203	0.00747805	UP	ENSMUSG00000021482	Q9D1A0	Aaed1	AhpC/TSA antioxidant enzyme domain containing 1
19724	ENSMUST00000005600	1.53402	0.00163221	UP	ENSMUSG00000031706	P48377	Rfx1	MHC class II regulatory factor RFX1 [Source:UniProtKB/Swiss-Prot;Acc:P48377]
81898	ENSMUST00000027127	1.53555	0.0415979	UP	ENSMUSG00000025982	Q8C2Y9	Sf3b1	splicing factor 3b, subunit 1 [Source:MGI Symbol;Acc:MGI:1932339]
237890	ENSMUST00000163961	1.53564	0.00412419	UP	ENSMUSG00000082101	V9GXG1	Slfn14	Protein SLFN14 C-terminally truncated SLFN14 endoribonuclease [Source:UniProtKB/Swiss-Prot;Acc:V9GXG1]
17155	ENSMUST00000105469	1.53943	0.00936212	UP	ENSMUSG00000003746	P45700	Man1a	mannosidase 1, alpha [Source:MGI Symbol;Acc:MGI:104677]
70349	ENSMUST00000033012	1.54268	0.0392482	UP	ENSMUSG00000030754	Q9JIF7	Copb1	Coatomer subunit beta [Source:UniProtKB/Swiss-Prot;Acc:Q9JIF7]
69546	ENSMUST00000119664	1.54559	0.0146212	UP	ENSMUSG00000041775	Q9D7G9	Mapk1ip1	MAPK-interacting and spindle-stabilizing protein [Source:UniProtKB/Swiss-Prot;Acc:Q9D7G9]
68554	ENSMUST00000063817	1.54608	0.00713545	UP	ENSMUSG00000062691	Q8BTE5	Cebpzos	Protein CEBPZOS [Source:UniProtKB/Swiss-Prot;Acc:Q8BTE5]
67155	ENSMUST00000176019	1.54993	0.00464979	UP	ENSMUSG00000024921	Q6DIC0	Smarca2	SWI/SNF related, matrix associated, actin dependent regulator of chromatin, subfamily a, member 2 [Source:MGI Symbol;Acc:MGI:99603]
70317	ENSMUST00000076921	1.55051	0.0353913	UP	ENSMUSG00000057594	B1ATY8	Arl16	ADP-ribosylation factor-like 16 [Source:MGI Symbol;Acc:MGI:1917567]
79202	ENSMUST00000075588	1.55216	0.00222299	UP	ENSMUSG00000010751	Q9ER62	Tnfrsf22	Tumor necrosis factor receptor superfamily member 22 [Source:UniProtKB/Swiss-Prot;Acc:Q9ER62]
270058	ENSMUST00000212697	1.55239	0.0387727	UP	ENSMUSG00000019261	Q8C052	Map1s	Microtubule-associated protein 1S MAP1S heavy chain MAP1S light chain [Source:UniProtKB/Swiss-Prot;Acc:Q8C052]
225164	ENSMUST00000052838	1.55316	0.00301065	UP	ENSMUSG00000024294	Q80SY4	Mib1	E3 ubiquitin-protein ligase MIB1 [Source:UniProtKB/Swiss-Prot;Acc:Q80SY4]
54624	ENSMUST00000143201	1.5534	0.00301823	UP	ENSMUSG00000003437	Q8K2T8	Paf1	RNA polymerase II-associated factor 1 homolog [Source:UniProtKB/Swiss-Prot;Acc:Q8K2T8]
59024	ENSMUST00000146877	1.55511	0.0364323	UP	ENSMUSG00000079487	Q2NLB9	Med12	Mediator of RNA polymerase II transcription subunit 12 [Source:UniProtKB/Swiss-Prot;Acc:A2AGH6]
17918	ENSMUST00000142181	1.56032	0.00172965	UP	ENSMUSG00000034593	Q99104	Myo5a	Unconventional myosin-Va [Source:UniProtKB/Swiss-Prot;Acc:Q99104]
224836	ENSMUST00000024779	1.5606	0.011118	UP	ENSMUSG00000090115	Q6P9L4	Usp49	ubiquitin specific peptidase 49 [Source:MGI Symbol;Acc:MGI:2685391]
76425	ENSMUST00000078687	1.56095	0.00296246	UP	ENSMUSG00000027573	Q9D7M1	Gid8	Glucose-induced degradation [Source:UniProtKB/Swiss-Prot;Acc:Q9D7M1]
100040049	ENSMUST00000208788	1.56342	0.0400292	UP	ENSMUSG00000109305	A0A1L1SR87	1810010D01Rik	RIKEN cDNA 1810010D01 gene [Source:MGI Symbol;Acc:MGI:1916283]
66875	ENSMUST00000138095	1.56463	0.0420596	UP	ENSMUSG00000052748	Q9DBQ9	Swt1	Transcriptional protein SWT1 [Source:UniProtKB/Swiss-Prot;Acc:Q9DBQ9]
235633	ENSMUST00000155014	1.56486	0.0494137	UP	ENSMUSG00000044037	A0A0R4J1X4	Als2cl	ALS2 C-terminal like [Source:HGNC Symbol;Acc:HGNC:20605]
228602	ENSMUST00000148924	1.56655	0.00205551	UP	ENSMUSG00000027309	Q7TT23	4930402H24Rik	Uncharacterized [Source:UniProtKB/Swiss-Prot;Acc:Q7TT23]
238505	ENSMUST00000221190	1.56868	0.00918299	UP	ENSMUSG00000021311	A6H5Y3	Mtr	5-methyltetrahydrofolate-homocysteine methyltransferase
27215	ENSMUST00000135251	1.57126	0.0173409	UP	ENSMUSG00000039285	Q9QYP6	Azi2	5-azacytidine-induced protein 2 [Source:UniProtKB/Swiss-Prot;Acc:Q9QYP6]
210622	ENSMUST00000028612	1.57301	0.0199163	UP	ENSMUSG00000027188	Q8BU25	Pamr1	Inactive serine protease PAMR1 [Source:UniProtKB/Swiss-Prot;Acc:Q8BU25]
66394	ENSMUST00000210998	1.57329	0.0420263	UP	ENSMUSG00000003421	Q9D6T0	Nosip	Nitric oxide synthase-interacting protein [Source:UniProtKB/Swiss-Prot;Acc:Q9D6T0]
320484	ENSMUST00000143808	1.57379	0.0473961	UP	ENSMUSG00000052142	Q8CAS7	Rasal3	RAS protein activator like 3 [Source:MGI Symbol;Acc:MGI:2444128]
193740	ENSMUST00000087328	1.57395	0.0382153	UP	ENSMUSG00000091971	Q3TU85	Hspa1a	Heat shock 70 kDa protein 1A [Source:UniProtKB/Swiss-Prot;Acc:Q61696]
232341	ENSMUST00000159397	1.57435	0.0271601	UP	ENSMUSG00000045962	P83741	Wnk1	WNK lysine deficient protein kinase 1 [Source:MGI Symbol;Acc:MGI:2442092]
70086	ENSMUST00000228154	1.57571	0.0365228	UP	ENSMUSG00000033470	Q920A1	Cysltr2	cysteinyl leukotriene receptor 2
17250	ENSMUST00000147759	1.57618	0.00165423	UP	ENSMUSG00000023088	A5D6P3	Abcc1	ATP-binding cassette, sub-family C (CFTR/MRP), member 1 [Source:MGI Symbol;Acc:MGI:102676]
14368	ENSMUST00000179165	1.57727	0.00639912	UP	ENSMUSG00000022297	Q3UTZ0	Fzd6	frizzled class receptor 6
19069	ENSMUST00000178253	1.57932	0.024129	UP	ENSMUSG00000040667	Q8CEC0	Nup88	nucleoporin 88 [Source:MGI Symbol;Acc:MGI:104900]
76539	ENSMUST00000065286	1.58035	0.0102986	UP	ENSMUSG00000057858	Q8C6C7	Fam204a	family with sequence similarity 204, member A
269643	ENSMUST00000031003	1.58597	0.0131381	UP	ENSMUSG00000029120	Q8BG02	Ppp2r2c	protein phosphatase 2, regulatory subunit B, gamma [Source:MGI Symbol;Acc:MGI:2442660]
109212	ENSMUST00000021164	1.58949	0.0476987	UP	ENSMUSG00000020808	Q8BFY7	Pimreg	Protein PIMREG [Source:UniProtKB/Swiss-Prot;Acc:Q8BFY7]
50768	ENSMUST00000179652	1.58982	0.0115135	UP	ENSMUSG00000031523	Q9R0Z9	Dlc1	DLC1 Rho GTPase activating protein [Source:HGNC Symbol;Acc:HGNC:2897]
73139	ENSMUST00000135497	1.58999	0.0131161	UP	ENSMUSG00000018509	Q9CXS4	Cenpv	Centromere protein V [Source:UniProtKB/Swiss-Prot;Acc:Q9CXS4]
319822	ENSMUST00000135774	1.59439	0.0468388	UP	ENSMUSG00000018809	Q8BTK5	Smyd4	SET and MYND domain-containing protein 4 [Source:UniProtKB/Swiss-Prot;Acc:Q8BTK5]
68427	ENSMUST00000149430	1.59479	0.00917911	UP	ENSMUSG00000002105	Q8BZH0	Slc39a13	solute carrier family 39 (metal ion transporter), member 13 [Source:MGI Symbol;Acc:MGI:1915677]
212127	ENSMUST00000198186	1.59672	0.0175805	UP	ENSMUSG00000049504	Q5PRE5	Proser1	Proline and serine-rich protein 1 [Source:UniProtKB/Swiss-Prot;Acc:Q5PRE5]
74182	ENSMUST00000127712	1.59857	0.000574052	UP	ENSMUSG00000027346	Q8C0L9	Gpcpd1	glycerophosphocholine phosphodiesterase 1 [Source:MGI Symbol;Acc:MGI:104898]
12482	ENSMUST00000169159	1.60187	0.0264225	UP	ENSMUSG00000024673	Q542S5	Ms4a1	membrane-spanning 4-domains, subfamily A, member 1 [Source:MGI Symbol;Acc:MGI:88321]
208076	ENSMUST00000188348	1.60327	0.0414563	UP	ENSMUSG00000035934	Q8BG99	Pknox2	Homeobox protein PKNOX2 [Source:UniProtKB/Swiss-Prot;Acc:Q8BG99]
56760	ENSMUST00000032262	1.60364	0.012978	UP	ENSMUSG00000030159	Q9JL99	Clec1b	C-type lectin domain family 1 member B [Source:UniProtKB/Swiss-Prot;Acc:Q9JL99]
53325	ENSMUST00000172513	1.60402	0.00881654	UP	ENSMUSG00000025316	Q8VBU8	Banp	Protein BANP [Source:UniProtKB/Swiss-Prot;Acc:Q8VBU8]
110006	ENSMUST00000122994	1.60406	0.03938	UP	ENSMUSG00000025534	P12265	Gusb	glucuronidase, beta [Source:MGI Symbol;Acc:MGI:95872]
50933	ENSMUST00000228773	1.60727	0.0096052	UP	ENSMUSG00000022111	Q9JKB1	Uchl3	ubiquitin carboxyl-terminal esterase L3 (ubiquitin thiolesterase)
319153	ENSMUST00000189457	1.60751	0.0377094	UP	ENSMUSG00000101972	P68433	Hist1h3i	Histone H3.1 [Source:UniProtKB/Swiss-Prot;Acc:P68433]
100037278	ENSMUST00000132891	1.60849	0.0121531	UP	ENSMUSG00000043243	D3YZB0	Fam129c	family with sequence similarity 129 member C [Source:HGNC Symbol;Acc:HGNC:24130]
17827	ENSMUST00000124086	1.61471	0.0244759	UP	ENSMUSG00000064068	G3UXX9,Q8R5C0,G3XA75,D3Z3F4,F7C846,G3XA66,P47802,G3UYJ5,G3UZR5,G3UXB5,D3YVW0,G3UXP6	Mtx1	metaxin 1 [Source:MGI Symbol;Acc:MGI:103025]
432467	ENSMUST00000141616	1.61983	0.00256545	UP	ENSMUSG00000020069	D3Z3N4	Hnrnph3	Mus musculus heteroous nuclear ribonucleoprotein H3 (Hnrnph3), transcript variant 3, mRNA. [Source:RefSeq mRNA;Acc:NM_001359260]
69202	ENSMUST00000181150	1.62013	0.0375563	UP	ENSMUSG00000030122	Q9D0J8	Ptms	Parathymosin [Source:UniProtKB/Swiss-Prot;Acc:Q9D0J8]
70310	ENSMUST00000019605	1.62328	0.00720149	UP	ENSMUSG00000019461	Q5F283	Plscr3	Phospholipid scramblase 3 [Source:UniProtKB/Swiss-Prot;Acc:Q9JIZ9]
71448	ENSMUST00000155657	1.6243	0.0388106	UP	ENSMUSG00000025505	Q9D3H0	Tmem80	Transmembrane protein 80 [Source:UniProtKB/Swiss-Prot;Acc:Q9D3H0]
14130	ENSMUST00000161503	1.62684	0.00921783	UP	ENSMUSG00000026656	A0A0B4J1G1	Fcgr2b	Fc receptor, IgG, low affinity IIb
69748	ENSMUST00000209581	1.62729	0.00470549	UP	ENSMUSG00000007833	D3Z0B9	Aldh16a1	aldehyde dehydrogenase 16 family, member A1 [Source:MGI Symbol;Acc:MGI:1916998]
74374	ENSMUST00000145866	1.62835	0.0416154	UP	ENSMUSG00000068663	Q80U30	Clec16a	Protein CLEC16A [Source:UniProtKB/Swiss-Prot;Acc:Q80U30]
231148	ENSMUST00000101280	1.63115	0.0373046	UP	ENSMUSG00000029095	Q8BL65	Ablim2	actin-binding LIM protein 2 [Source:MGI Symbol;Acc:MGI:2385758]
22138	ENSMUST00000099981	1.63156	0.0424701	UP	ENSMUSG00000051747	Q8BUJ6	Ttn	titin [Source:MGI Symbol;Acc:MGI:98864]
216613	ENSMUST00000140601	1.63268	0.0490055	UP	ENSMUSG00000032878	Q5SP85	Ccdc85a	Coiled-coil domain-containing protein 85A [Source:UniProtKB/Swiss-Prot;Acc:Q5SP85]
19882	ENSMUST00000194527	1.63317	0.0195861	UP	ENSMUSG00000032584	Q62190	Mst1r	macrophage stimulating 1 receptor (c-met-related tyrosine kinase) [Source:MGI Symbol;Acc:MGI:99614]
93687	ENSMUST00000170482	1.63986	0.0399913	UP	ENSMUSG00000024576	Q6PJ87	Csnk1a1	casein kinase 1, alpha 1 [Source:MGI Symbol;Acc:MGI:1934950]
226412	ENSMUST00000187900	1.64237	0.0290383	UP	ENSMUSG00000056211	E9Q9Q2	R3hdm1	R3H domain containing 1 [Source:MGI Symbol;Acc:MGI:2448514]
15511	ENSMUST00000172753	1.64549	0.0344292	UP	ENSMUSG00000090877	P17879	Hspa1b	Heat shock 70 kDa protein 1B [Source:UniProtKB/Swiss-Prot;Acc:P17879]
12265	ENSMUST00000230392	1.64689	0.00416916	UP	ENSMUSG00000022504	P79621	Ciita	class II transactivator
268527	ENSMUST00000162112	1.64907	0.000926848	UP	ENSMUSG00000036523	Q3UHK3	Greb1	Protein GREB1 [Source:UniProtKB/Swiss-Prot;Acc:Q3UHK3]
219114	ENSMUST00000022536	1.6518	0.0169404	UP	ENSMUSG00000021965	Q8C263	Ska3	spindle and kinetochore associated complex subunit 3
140703	ENSMUST00000153308	1.65257	0.0462531	UP	ENSMUSG00000034164	Q91VF5	Emid1	EMI domain-containing protein 1 [Source:UniProtKB/Swiss-Prot;Acc:Q91VF5]
16468	ENSMUST00000172924	1.65777	0.0161359	UP	ENSMUSG00000038518	Q62315	Jarid2	Protein Jumonji [Source:UniProtKB/Swiss-Prot;Acc:Q62315]
320538	ENSMUST00000161280	1.65825	0.00823986	UP	ENSMUSG00000038538	Q80WC1	Ubn2	ubinuclein 2 [Source:MGI Symbol;Acc:MGI:2444236]
218811	ENSMUST00000048657	1.66123	0.0316893	UP	ENSMUSG00000039367	Q80U83	Sec24c	Sec24 related gene family, member C (S. cerevisiae)
269400	ENSMUST00000139608	1.66149	0.0349963	UP	ENSMUSG00000038685	Q0VGM9	Rtel1	Regulator of telomere elongation helicase 1 [Source:UniProtKB/Swiss-Prot;Acc:Q0VGM9]
12235	ENSMUST00000133943	1.66422	0.00443215	UP	ENSMUSG00000027379	O08901	Bub1	mitotic checkpoint serine/threonine-protein kinase BUB1 isoform 2 [Source:RefSeq peptide;Acc:NP_033902]
30806	ENSMUST00000068135	1.66548	0.0167659	UP	ENSMUSG00000031994	F8VQ15	Adamts8	A disintegrin and metalloproteinase with thrombospondin motifs 8 isoform 2 [Source:RefSeq peptide;Acc:NP_001313221]
67946	ENSMUST00000122820	1.67095	0.011634	UP	ENSMUSG00000034401	Q3U6K5	Spata6	Spermatosis-associated protein 6 [Source:UniProtKB/Swiss-Prot;Acc:Q3U6K5]
15366	ENSMUST00000020579	1.67156	0.01696	UP	ENSMUSG00000020330	Q3UPW7	Hmmr	Hyaluronan mediated motility receptor [Source:UniProtKB/Swiss-Prot;Acc:Q00547]
18667	ENSMUST00000189181	1.67412	0.00159198	UP	ENSMUSG00000031870	A6H6A5	Pgr	Progesterone receptor [Source:UniProtKB/Swiss-Prot;Acc:Q00175]
20737	ENSMUST00000143713	1.68044	0.0059922	UP	ENSMUSG00000051457	Q544C5	Spn	sialophorin [Source:MGI Symbol;Acc:MGI:98384]
319604	ENSMUST00000208406	1.68175	0.00415802	UP	ENSMUSG00000029461	Q68FE1	Fam168a	Protein FAM168A [Source:UniProtKB/Swiss-Prot;Acc:Q8BGZ2]
56190	ENSMUST00000130430	1.68321	0.0492129	UP	ENSMUSG00000027510	Q62176	Rbm38	RNA-binding protein 38 [Source:UniProtKB/Swiss-Prot;Acc:Q62176]
140917	ENSMUST00000147894	1.68447	0.0416255	UP	ENSMUSG00000027845	Q8C7W7	Dclre1b	5' exonuclease Apollo [Source:UniProtKB/Swiss-Prot;Acc:Q8C7W7]
20111	ENSMUST00000173989	1.69193	0.0139515	UP	ENSMUSG00000003644	P18653	Rps6ka1	ribosomal protein S6 kinase polypeptide 1 [Source:MGI Symbol;Acc:MGI:104558]
13132	ENSMUST00000162094	1.69323	0.0428194	UP	ENSMUSG00000022150	A0A0R4J104	Dab2	DAB2, clathrin adaptor protein [Source:HGNC Symbol;Acc:HGNC:2662]
20841	ENSMUST00000211798	1.69924	0.0429874	UP	ENSMUSG00000061079	O70230	Zfp143	zinc finger protein 143 [Source:MGI Symbol;Acc:MGI:1277969]
20286	ENSMUST00000231108	1.71082	0.010222	UP	ENSMUSG00000022390	F8VPP8	Zc3h7b	zinc finger CCCH type containing 7B
12050	ENSMUST00000227108	1.71563	0.0255728	UP	ENSMUSG00000089682	P70345	Bcl2l2	Bcl-2-like protein 2 [Source:UniProtKB/Swiss-Prot;Acc:P70345]
238037	ENSMUST00000053034	1.71594	0.00943355	UP	ENSMUSG00000051721	Q6NV72	Wdcp	WD repeat and coiled coil containing
230393	ENSMUST00000147527	1.71806	0.0497226	UP	ENSMUSG00000038368	A2AKG8	Focad	Focadhesin [Source:UniProtKB/Swiss-Prot;Acc:A2AKG8]
224705	ENSMUST00000174588	1.72651	0.0151042	UP	ENSMUSG00000024319	Q8C754	Vps52	VPS52 GARP complex subunit [Source:MGI Symbol;Acc:MGI:1330304]
18033	ENSMUST00000196246	1.73461	0.0483959	UP	ENSMUSG00000028163	P25799	Nfkb1	Nuclear factor NF-kappa-B p105 subunit Nuclear factor NF-kappa-B p50 subunit [Source:UniProtKB/Swiss-Prot;Acc:P25799]
74154	ENSMUST00000039734	1.73547	0.0143814	UP	ENSMUSG00000015127	Q5FWH2	Unkl	unkempt family like zinc finger [Source:MGI Symbol;Acc:MGI:1921404]
72635	ENSMUST00000065323	1.73666	0.00303469	UP	ENSMUSG00000053091	Q3U1D0	Lins1	1 [Source:UniProtKB/Swiss-Prot;Acc:Q3U1D0]
70551	ENSMUST00000135917	1.73706	0.0313962	UP	ENSMUSG00000041594	Q8BG19	Tmtc4	Transmembrane and TPR repeat-containing protein 4 [Source:UniProtKB/Swiss-Prot;Acc:Q8BG19]
67425	ENSMUST00000163137	1.73783	0.0216209	UP	ENSMUSG00000006154	Q8R5F8	Eps8l1	Epidermal growth factor receptor kinase substrate 8-like protein 1 [Source:UniProtKB/Swiss-Prot;Acc:Q8R5F8]
57277	ENSMUST00000190433	1.73927	0.00298269	UP	ENSMUSG00000022596	Q9Z0K7	Slurp1	Secreted Ly-6/uPAR-related protein 1 [Source:UniProtKB/Swiss-Prot;Acc:Q9Z0K7]
320162	ENSMUST00000131244	1.74023	0.0237924	UP	ENSMUSG00000018372	Q8BWE9	Cep95	Centrosomal protein of 95 kDa [Source:UniProtKB/Swiss-Prot;Acc:Q8BVV7]
109019	ENSMUST00000027279	1.74036	0.0339561	UP	ENSMUSG00000026107	Q8BGW5	Nabp1	SOSS complex subunit B2 [Source:UniProtKB/Swiss-Prot;Acc:Q8BGW5]
215653	ENSMUST00000140791	1.74132	0.0393499	UP	ENSMUSG00000027339	Q8BMS9	Rassf2	Ras association domain-containing protein 2 [Source:UniProtKB/Swiss-Prot;Acc:Q8BMS9]
17913	ENSMUST00000123064	1.74267	0.0340407	UP	ENSMUSG00000017774	Q9WTI7	Myo1c	Unconventional myosin-Ic [Source:UniProtKB/Swiss-Prot;Acc:Q9WTI7]
54598	ENSMUST00000074262	1.74405	0.0362068	UP	ENSMUSG00000059588	A2AR99	Calcrl	Calcitonin-related peptide type 1 receptor [Source:UniProtKB/Swiss-Prot;Acc:Q9R1W5]
30843	ENSMUST00000086459	1.74503	0.047121	UP	ENSMUSG00000066892	Q9EPX5	Fbxl12	F-box/LRR-repeat protein 12 [Source:UniProtKB/Swiss-Prot;Acc:Q9EPX5]
97114	ENSMUST00000167403	1.74549	0.0298412	UP	ENSMUSG00000081058	B9EI85	Hist2h3c2	Histone H3.2 [Source:UniProtKB/Swiss-Prot;Acc:P84228]
108000	ENSMUST00000171929	1.74587	0.00248524	UP	ENSMUSG00000026605	E9Q3P4	Cenpf	centromere protein F [Source:MGI Symbol;Acc:MGI:1313302]
12721	ENSMUST00000133718	1.74805	0.0170233	UP	ENSMUSG00000030707	O89053	Coro1a	Coronin-1A [Source:UniProtKB/Swiss-Prot;Acc:O89053]
52850	ENSMUST00000112324	1.74893	0.0376317	UP	ENSMUSG00000042216	Q8BPQ7	Sgsm1	Small G protein signaling modulator 1 [Source:UniProtKB/Swiss-Prot;Acc:Q8BPQ7]
27218	ENSMUST00000015460	1.75047	0.0124683	UP	ENSMUSG00000015316	Q9QUM4	Slamf1	signaling lymphocytic activation molecule family member 1 [Source:MGI Symbol;Acc:MGI:1351314]
100037278	ENSMUST00000143662	1.76042	0.00857401	UP	ENSMUSG00000043243	D3YZB0	Fam129c	family with sequence similarity 129 member C [Source:HGNC Symbol;Acc:HGNC:24130]
209224	ENSMUST00000114914	1.76254	0.043414	UP	ENSMUSG00000031109	Q8R0Z2	Enox2	Ecto-NOX disulfide-thiol exchanger 2 Hydroquinone [NADH] oxidase Protein disulfide-thiol oxidoreductase [Source:UniProtKB/Swiss-Prot;Acc:Q8R0Z2]
11532	ENSMUST00000159392	1.76576	0.0311795	UP	ENSMUSG00000028138	P28474	Adh5	Alcohol dehydrogenase class-3 [Source:UniProtKB/Swiss-Prot;Acc:P28474]
22757	ENSMUST00000085671	1.76833	0.0149453	UP	ENSMUSG00000055991	Q9Z1D8	Zkscan5	zinc finger with KRAB and SCAN domains 5 [Source:MGI Symbol;Acc:MGI:107533]
11687	ENSMUST00000019068	1.76834	0.00705066	UP	ENSMUSG00000018924	P39654	Alox15	Arachidonate 15-lipoxygenase [Source:UniProtKB/Swiss-Prot;Acc:P39654]
240354	ENSMUST00000224056	1.7715	0.0451884	UP	ENSMUSG00000032688	Q2TBA3	Malt1	Mucosa-associated lymphoid tissue lymphoma translocation [Source:UniProtKB/Swiss-Prot;Acc:Q2TBA3]
13838	ENSMUST00000189934	1.77333	0.00558942	UP	ENSMUSG00000026235	Q03137	Epha4	Ephrin type-A receptor 4 [Source:UniProtKB/Swiss-Prot;Acc:Q03137]
71782	ENSMUST00000196865	1.77521	0.00516585	UP	ENSMUSG00000029501	Q6P1H6	Ankle2	Ankyrin repeat and LEM domain-containing protein 2 [Source:UniProtKB/Swiss-Prot;Acc:Q6P1H6]
229937	ENSMUST00000197474	1.78241	0.0150904	UP	ENSMUSG00000074182	Q3UFB2	Znhit6	zinc finger, HIT type 6 [Source:MGI Symbol;Acc:MGI:1916996]
76820	ENSMUST00000223061	1.78442	0.0494991	UP	ENSMUSG00000020589	Q8BHZ0	Fam49a	family with sequence similarity 49, member A
17345	ENSMUST00000033310	1.78504	0.00234141	UP	ENSMUSG00000031004	Q7TSF6	Mki67	Proliferation marker protein Ki-67 [Source:UniProtKB/Swiss-Prot;Acc:E9PVX6]
12750	ENSMUST00000109111	1.78515	0.0067827	UP	ENSMUSG00000020385	Q4FJV9	Clk4	Dual specificity protein kinase CLK4 [Source:UniProtKB/Swiss-Prot;Acc:O35493]
14731	ENSMUST00000164680	1.788	0.0355614	UP	ENSMUSG00000022561	Q9WTK3	Gpaa1	GPI anchor attachment protein 1 [Source:MGI Symbol;Acc:MGI:1202392]
546071	ENSMUST00000211841	1.79219	0.0220282	UP	ENSMUSG00000031833	E9Q8S5	Mast3	Microtubule-associated serine/threonine-protein kinase 3 [Source:UniProtKB/Swiss-Prot;Acc:Q3U214]
240726	ENSMUST00000115403	1.79528	0.000808357	UP	ENSMUSG00000025938	E9PVD9	Slco5a1	solute carrier organic anion transporter family, member 5A1 [Source:MGI Symbol;Acc:MGI:2443431]
242248	ENSMUST00000198034	1.79534	0.0010826	UP	ENSMUSG00000037922	Q80VH0	Bank1	B-cell scaffold protein with ankyrin repeats [Source:UniProtKB/Swiss-Prot;Acc:Q80VH0]
623474	ENSMUST00000070755	1.79778	0.011721	UP	ENSMUSG00000078773	Q6PFE3	Rad54b	DNA repair and recombination protein RAD54B [Source:UniProtKB/Swiss-Prot;Acc:Q6PFE3]
75029	ENSMUST00000078058	1.80048	0.00615152	UP	ENSMUSG00000049184	Q8R4E6	Purg	Purine-rich element-binding protein gamma [Source:UniProtKB/Swiss-Prot;Acc:Q8R4E6]
20617	ENSMUST00000203177	1.80144	0.0291792	UP	ENSMUSG00000025889	O55042	Snca	Alpha-synuclein [Source:UniProtKB/Swiss-Prot;Acc:O55042]
208628	ENSMUST00000031366	1.80851	0.0400447	UP	ENSMUSG00000029414	Q8C3Y4	Kntc1	Kinetochore-associated protein 1 [Source:UniProtKB/Swiss-Prot;Acc:Q8C3Y4]
12295	ENSMUST00000124170	1.80881	0.0146078	UP	ENSMUSG00000020882	A2A545	Cacnb1	Voltage-dependent L-type calcium channel subunit beta-1 [Source:UniProtKB/Swiss-Prot;Acc:Q8R3Z5]
403183	ENSMUST00000054801	1.81027	0.028318	UP	ENSMUSG00000046828	Q8CDZ2	Mettl21e	Protein-lysine methyltransferase METTL21E [Source:UniProtKB/Swiss-Prot;Acc:Q8CDZ2]
234847	ENSMUST00000128803	1.81185	0.000539808	UP	ENSMUSG00000000738	Q3ULF4	Spg7	Paraplegin [Source:UniProtKB/Swiss-Prot;Acc:Q3ULF4]
71602	ENSMUST00000213863	1.82333	0.0309518	UP	ENSMUSG00000032220	E9Q634	Myo1e	Unconventional myosin-Ie [Source:UniProtKB/Swiss-Prot;Acc:E9Q634]
223970	ENSMUST00000037913	1.8357	0.00136143	UP	ENSMUSG00000037991	Q3UPE3	Rmi2	RecQ-mediated genome instability protein 2 [Source:UniProtKB/Swiss-Prot;Acc:Q3UPE3]
75869	ENSMUST00000069870	1.83817	0.000907961	UP	ENSMUSG00000017418	Q9D4P0	Arl5b	ADP ribosylation factor like GTPase 5B [Source:HGNC Symbol;Acc:HGNC:23052]
20973	ENSMUST00000143852	1.84513	0.0293703	UP	ENSMUSG00000048277	O55101	Syngr2	Synaptogyrin-2 [Source:UniProtKB/Swiss-Prot;Acc:O55101]
20843	ENSMUST00000136323	1.85313	0.0450841	UP	ENSMUSG00000025862	O35638	Stag2	stromal antigen 2 [Source:MGI Symbol;Acc:MGI:1098583]
73205	ENSMUST00000156472	1.85508	0.00861875	UP	ENSMUSG00000028300	Q3U3D8	3110043O21Rik	Guanine nucleotide exchange C9orf72 homolog [Source:UniProtKB/Swiss-Prot;Acc:Q6DFW0]
68188	ENSMUST00000146903	1.85727	0.00179844	UP	ENSMUSG00000023118	F8WJD4	Sympk	symplekin [Source:HGNC Symbol;Acc:HGNC:22935]
207798	ENSMUST00000179565	1.85852	0.029387	UP	ENSMUSG00000036292	Q8CI52	Gramd1c	GRAM domain-containing protein 1C [Source:UniProtKB/Swiss-Prot;Acc:Q8CI52]
69179	ENSMUST00000227776	1.85927	0.0487315	UP	ENSMUSG00000006526	Q3UF25	Tmem110	Store-operated calcium entry regulator STIMATE [Source:UniProtKB/Swiss-Prot;Acc:Q3UF25]
19155	ENSMUST00000165489	1.86015	0.0194682	UP	ENSMUSG00000001441	Q11011	Npepps	Puromycin-sensitive aminopeptidase [Source:UniProtKB/Swiss-Prot;Acc:Q11011]
214580	ENSMUST00000148533	1.8609	0.0124305	UP	ENSMUSG00000063179	Q8BP74	Pstk	L-seryl-tRNA(Sec) kinase [Source:UniProtKB/Swiss-Prot;Acc:Q8BP74]
216350	ENSMUST00000080630	1.86584	0.00501746	UP	ENSMUSG00000034127	Q8R3G9	Tspan8	tetraspanin 8
193742	ENSMUST00000173247	1.86975	0.0118648	UP	ENSMUSG00000007036	Q9Z1Q2	Abhd16a	abhydrolase domain containing 16A [Source:MGI Symbol;Acc:MGI:99476]
16835	ENSMUST00000214549	1.87515	0.0325201	UP	ENSMUSG00000032193	P35951	Ldlr	Low-density lipoprotein receptor [Source:UniProtKB/Swiss-Prot;Acc:P35951]
56453	ENSMUST00000098362	1.87858	0.00244142	UP	ENSMUSG00000031835	Q9WTZ2	Mbtps1	Membrane-bound transcription factor site-1 protease [Source:UniProtKB/Swiss-Prot;Acc:Q9WTZ2]
19419	ENSMUST00000110898	1.8819	0.0226203	UP	ENSMUSG00000027347	Q9Z1S3	Rasgrp1	RAS guanyl releasing protein 1 [Source:MGI Symbol;Acc:MGI:1314635]
218397	ENSMUST00000142285	1.88668	0.0224418	UP	ENSMUSG00000021549	E9PYG6	Rasa1	RAS p21 protein activator 1 [Source:HGNC Symbol;Acc:HGNC:9871]
234779	ENSMUST00000081232	1.88668	0.00318894	UP	ENSMUSG00000034330	Q8CIH5	Plcg2	1-phosphatidylinositol 4,5-bisphosphate phosphodiesterase gamma-2 [Source:UniProtKB/Swiss-Prot;Acc:Q8CIH5]
109700	ENSMUST00000224268	1.88902	0.000229914	UP	ENSMUSG00000042284	Q8BPT3	Itga1	integrin alpha 1
17227	ENSMUST00000043249	1.90069	0.031739	UP	ENSMUSG00000061068	Q3UN88	Mcpt4	mast cell protease 4
69617	ENSMUST00000222061	1.90213	0.0275703	UP	ENSMUSG00000021193	Q8K411	Pitrm1	pitrilysin metallepetidase 1
231803	ENSMUST00000031740	1.92711	0.0468722	UP	ENSMUSG00000029726	Q8K3A9	Mepce	7SK snRNA methylphosphate capping enzyme [Source:UniProtKB/Swiss-Prot;Acc:Q8K3A9]
19718	ENSMUST00000200767	1.93234	0.0151878	UP	ENSMUSG00000023104	Q9WUK4	Rfc2	replication factor C (activator 1) 2 [Source:MGI Symbol;Acc:MGI:1341868]
74568	ENSMUST00000120432	1.93351	0.0360738	UP	ENSMUSG00000012519	Q9D2Y4	Mlkl	Mixed lineage kinase domain-like protein [Source:UniProtKB/Swiss-Prot;Acc:Q9D2Y4]
67295	ENSMUST00000224287	1.93508	0.046626	UP	ENSMUSG00000021700	P62823	Rab3c	RAB3C, member RAS oncogene family
66860	ENSMUST00000112568	1.93667	0.0124004	UP	ENSMUSG00000035168	Q0VGY8	Tanc1	Protein TANC1 [Source:UniProtKB/Swiss-Prot;Acc:Q0VGY8]
319148	ENSMUST00000091752	1.9371	0.0415723	UP	ENSMUSG00000069310	B9EI85	Hist1h3c	Histone H3.2 [Source:UniProtKB/Swiss-Prot;Acc:P84228]
100637	ENSMUST00000016279	1.93997	0.0172958	UP	ENSMUSG00000041132	Q3V2Q8	N4bp2l1	NEDD4-binding protein 2-like 1 [Source:UniProtKB/Swiss-Prot;Acc:Q3V2Q8]
227656	ENSMUST00000114020	1.9444	0.00593254	UP	ENSMUSG00000052406	Q6PAQ4	Rexo4	RNA exonuclease 4 [Source:UniProtKB/Swiss-Prot;Acc:Q6PAQ4]
80288	ENSMUST00000220303	1.95178	0.00243978	UP	ENSMUSG00000063382	Q67FY2	Bcl9l	B cell CLL/lymphoma 9-like
15166	ENSMUST00000099513	1.95251	0.0219139	UP	ENSMUSG00000020331	O88703	Hcn2	Potassium/sodium hyperpolarization-activated cyclic nucleotide-gated channel 2 [Source:UniProtKB/Swiss-Prot;Acc:O88703]
76089	ENSMUST00000136126	1.95394	0.0126889	UP	ENSMUSG00000062232	E9QNQ4	Rapgef2	Rap guanine nucleotide exchange factor 2 [Source:UniProtKB/Swiss-Prot;Acc:Q8CHG7]
244853	ENSMUST00000216998	1.95697	0.025929	UP	ENSMUSG00000044229	Q52KP5	Nxpe4	NXPE family member 4 [Source:UniProtKB/Swiss-Prot;Acc:Q52KP5]
24050	ENSMUST00000023095	1.96019	0.0327645	UP	ENSMUSG00000022456	Q9Z1S5	Sept3	septin 3
54712	ENSMUST00000180573	1.9674	0.0341086	UP	ENSMUSG00000074785	Q9CRY9	Plxnc1	Plexin-C1 [Source:UniProtKB/Swiss-Prot;Acc:Q9QZC2]
12903	ENSMUST00000034830	1.96901	0.0260278	UP	ENSMUSG00000032291	P62965	Crabp1	Cellular retinoic acid-binding protein 1 [Source:UniProtKB/Swiss-Prot;Acc:P62965]
17192	ENSMUST00000105348	1.97302	0.0335834	UP	ENSMUSG00000035478	Q9Z2D8	Mbd3	Methyl-CpG-binding domain protein 3 [Source:UniProtKB/Swiss-Prot;Acc:Q9Z2D8]
72313	ENSMUST00000176910	1.9789	0.00252052	UP	ENSMUSG00000070733	Q80XD5	Fryl	FRY like transcription coactivator [Source:HGNC Symbol;Acc:HGNC:29127]
218639	ENSMUST00000224068	1.98283	0.0130188	UP	ENSMUSG00000042348	Q8BGR6	Arl15	ADP-ribosylation factor-like protein 15 [Source:UniProtKB/Swiss-Prot;Acc:Q8BGR6]
239081	ENSMUST00000185091	1.98657	0.0111413	UP	ENSMUSG00000051969	Q6R5P0	Tlr11	Toll-like receptor 11 [Source:UniProtKB/Swiss-Prot;Acc:Q6R5P0]
619605	ENSMUST00000129840	1.99146	0.0470705	UP	ENSMUSG00000028772	Q9ESX4	Zcchc17	zinc finger, CCHC domain containing 17 [Source:MGI Symbol;Acc:MGI:1919955]
20284	ENSMUST00000034023	1.99351	0.0039848	UP	ENSMUSG00000031610	O88745	Scrg1	scrapie responsive gene 1 [Source:MGI Symbol;Acc:MGI:1328308]
108148	ENSMUST00000034458	1.99383	0.0473015	UP	ENSMUSG00000089704	Q6PB93	Galnt2	Polypeptide N-acetylgalactosaminyltransferase 2 Polypeptide N-acetylgalactosaminyltransferase 2 soluble form [Source:UniProtKB/Swiss-Prot;Acc:Q6PB93]
234729	ENSMUST00000212829	1.99983	0.0385395	UP	ENSMUSG00000010936	Q80WQ2	Vac14	Vac14 homolog (S. cerevisiae) [Source:MGI Symbol;Acc:MGI:2157980]
76293	ENSMUST00000126308	2.00023	0.0112487	UP	ENSMUSG00000042436	Q9D1H9	Mfap4	Microfibril-associated glycoprotein 4 [Source:UniProtKB/Swiss-Prot;Acc:Q9D1H9]
14268	ENSMUST00000189821	2.00319	0.00727147	UP	ENSMUSG00000026193	P11276	Fn1	Fibronectin Anastellin [Source:UniProtKB/Swiss-Prot;Acc:P11276]
381801	ENSMUST00000204753	2.01491	0.0290546	UP	ENSMUSG00000056952	F8VQE6	Tatdn2	putative deoxyribonuclease TATDN2 isoform 1 [Source:RefSeq peptide;Acc:NP_001334285]
68842	ENSMUST00000141059	2.01862	0.04105	UP	ENSMUSG00000034377	Q9JIL5	Tulp4	tubby like protein 4 [Source:MGI Symbol;Acc:MGI:1916092]
15402	ENSMUST00000048794	2.02918	0.0279598	UP	ENSMUSG00000038253	P09021	Hoxa5	Homeobox protein Hox-A5 [Source:UniProtKB/Swiss-Prot;Acc:P09021]
11938	ENSMUST00000177974	2.03036	0.00785239	UP	ENSMUSG00000029467	Q5DTI2	Atp2a2	Sarcoplasmic/endoplasmic reticulum calcium ATPase 2 [Source:UniProtKB/Swiss-Prot;Acc:O55143]
17292	ENSMUST00000032760	2.03606	0.0118561	UP	ENSMUSG00000030544	P97309	Mesp1	Mesoderm posterior protein 1 [Source:UniProtKB/Swiss-Prot;Acc:P97309]
11514	ENSMUST00000228014	2.04202	0.0125309	UP	ENSMUSG00000022376	Q3UUN2	Adcy8	adenylate cyclase 8
54604	ENSMUST00000221675	2.04318	0.00926243	UP	ENSMUSG00000021140	Q9QYC1	Pcnx	pecanex homolog
12445	ENSMUST00000182591	2.04562	0.0450209	UP	ENSMUSG00000034165	P30282	Ccnd3	G1/S-specific cyclin-D3 [Source:UniProtKB/Swiss-Prot;Acc:P30282]
404743	ENSMUST00000103751	2.05024	0.0367728	UP	ENSMUSG00000076939	A0A0B4J1K5	Iglv3	immunoglobulin lambda variable 3
24071	ENSMUST00000169158	2.05435	0.00953656	UP	ENSMUSG00000090935	Q9D6K5	Synj2bp	synaptojanin 2 binding protein [Source:MGI Symbol;Acc:MGI:1344347]
14385	ENSMUST00000165839	2.05631	0.0107335	UP	ENSMUSG00000032114	Q9D1F9	Slc37a4	glucose-6-phosphate exchanger SLC37A4 isoform a [Source:RefSeq peptide;Acc:NP_001344659]
67463	ENSMUST00000099295	2.06337	0.0208916	UP	ENSMUSG00000021671	Q9DBS8	Poc5	POC5 centriolar protein
229003	ENSMUST00000149417	2.07181	0.00855746	UP	ENSMUSG00000027580	E9QAM5	Helz2	Helicase with zinc finger domain 2 [Source:UniProtKB/Swiss-Prot;Acc:E9QAM5]
14056	ENSMUST00000170327	2.07425	0.00677862	UP	ENSMUSG00000029687	Q61188	Ezh2	Histone-lysine N-methyltransferase EZH2 [Source:UniProtKB/Swiss-Prot;Acc:Q61188]
12265	ENSMUST00000230533	2.08902	0.0149558	UP	ENSMUSG00000022504	P79621	Ciita	class II transactivator
14268	ENSMUST00000188674	2.09225	0.00524748	UP	ENSMUSG00000026193	P11276	Fn1	Fibronectin Anastellin [Source:UniProtKB/Swiss-Prot;Acc:P11276]
66989	ENSMUST00000118762	2.09905	0.00374788	UP	ENSMUSG00000005936	Q8CDD8	Kctd20	Mus musculus potassium channel tetramerisation domain containing 20 (Kctd20), transcript variant 3, mRNA. [Source:RefSeq mRNA;Acc:NM_001356299]
78795	ENSMUST00000155168	2.10138	0.0186265	UP	ENSMUSG00000062590	Q9D2I5	Armc9	LisH domain-containing protein ARMC9 [Source:UniProtKB/Swiss-Prot;Acc:Q9D2I5]
104799	ENSMUST00000220858	2.11292	0.0348909	UP	ENSMUSG00000021038	Q8BGQ1	Vipas39	VPS33B interacting protein, apical-basolateral polarity regulator, spe-39 homolog
269209	ENSMUST00000113694	2.11514	0.00901279	UP	ENSMUSG00000033276	Q69ZM6	Stk36	serine/threonine kinase 36 [Source:MGI Symbol;Acc:MGI:1920831]
233406	ENSMUST00000174111	2.11555	0.023591	UP	ENSMUSG00000038943	Q99K43	Prc1	protein regulator of cytokinesis 1 [Source:MGI Symbol;Acc:MGI:1858961]
329727	ENSMUST00000166143	2.1276	0.0334756	UP	ENSMUSG00000007379	E9Q4E4	Dennd2c	DENN domain containing 2C [Source:HGNC Symbol;Acc:HGNC:24748]
11804	ENSMUST00000216921	2.12916	0.037167	UP	ENSMUSG00000031996	Q06335	Aplp2	Amyloid-like protein 2 [Source:UniProtKB/Swiss-Prot;Acc:Q06335]
225266	ENSMUST00000122333	2.15063	0.00133582	UP	ENSMUSG00000042514	Q69ZK5	Klhl14	Kelch-like protein 14 [Source:UniProtKB/Swiss-Prot;Acc:Q69ZK5]
104444	ENSMUST00000216142	2.15139	0.016214	UP	ENSMUSG00000032026	Q9D8S4	Rexo2	Mus musculus RNA exonuclease 2 (Rexo2), transcript variant 3, mRNA. [Source:RefSeq mRNA;Acc:NM_001357503]
338355	ENSMUST00000107461	2.15611	0.00395038	UP	ENSMUSG00000066151	Q6P9Q6	Fkbp15	FK506-binding protein 15 [Source:UniProtKB/Swiss-Prot;Acc:Q6P9Q6]
225372	ENSMUST00000173202	2.15955	0.00452902	UP	ENSMUSG00000006050	Q8R1C9	Sra1	amyloid beta (A4) precursor protein-binding, family B, member 3
20725	ENSMUST00000151283	2.16534	0.0374467	UP	ENSMUSG00000026315	O08800	Serpinb8	Serpin B8 [Source:UniProtKB/Swiss-Prot;Acc:O08800]
72568	ENSMUST00000193162	2.16583	0.0035915	UP	ENSMUSG00000058729	A0A0A6YVZ7	Lin9	lin-9 DREAM MuvB core complex component [Source:HGNC Symbol;Acc:HGNC:30830]
216856	ENSMUST00000056484	2.17039	0.00798526	UP	ENSMUSG00000051790	Q6PHN2	Nlgn2	Neuroligin-2 [Source:UniProtKB/Swiss-Prot;Acc:Q69ZK9]
20452	ENSMUST00000043336	2.17364	0.0463055	UP	ENSMUSG00000040710	Q53WR7	St8sia4	ST8 alpha-N-acetyl-neuraminide alpha-2,8-sialyltransferase 4 [Source:MGI Symbol;Acc:MGI:106018]
170718	ENSMUST00000028892	2.17762	0.0103139	UP	ENSMUSG00000027406	Q91VA7	Idh3b	isocitrate dehydrogenase 3 (NAD(+)) beta [Source:HGNC Symbol;Acc:HGNC:5385]
207592	ENSMUST00000207655	2.18265	0.00645594	UP	ENSMUSG00000039976	A2ABG4	Tbc1d16	Mus musculus TBC1 domain family, member 16 (Tbc1d16), transcript variant 2, mRNA. [Source:RefSeq mRNA;Acc:NM_001347625]
241431	ENSMUST00000112347	2.18777	0.0213727	UP	ENSMUSG00000027022	Q4U4S6	Xirp2	xin actin-binding repeat containing 2 [Source:MGI Symbol;Acc:MGI:2685198]
20419	ENSMUST00000022945	2.18787	0.0104184	UP	ENSMUSG00000022322	Q9Z179	Shcbp1	SHC SH2 domain-binding protein 1 [Source:UniProtKB/Swiss-Prot;Acc:Q9Z179]
18507	ENSMUST00000014174	2.18837	0.00842063	UP	ENSMUSG00000014030	Q02650	Pax5	Paired box protein Pax-5 [Source:UniProtKB/Swiss-Prot;Acc:Q02650]
23972	ENSMUST00000025833	2.19429	0.0368268	UP	ENSMUSG00000024899	O88428	Papss2	3'-phosphoadenosine 5'-phosphosulfate synthase 2
670558	ENSMUST00000170893	2.19896	0.00133815	UP	ENSMUSG00000091618	B1B213	H60c	Histocompatibility antigen 60c [Source:UniProtKB/Swiss-Prot;Acc:B1B213]
20182	ENSMUST00000173554	2.20156	0.010462	UP	ENSMUSG00000039656	P28704	Rxrb	retinoid X receptor beta [Source:MGI Symbol;Acc:MGI:98215]
226823	ENSMUST00000195787	2.21876	0.00123487	UP	ENSMUSG00000026608	Q8BFX3	Kctd3	BTB/POZ domain-containing protein KCTD3 [Source:UniProtKB/Swiss-Prot;Acc:Q8BFX3]
104836	ENSMUST00000101499	2.22544	0.0380833	UP	ENSMUSG00000020659	Q9JIY2	Cbll1	E3 ubiquitin-protein ligase Hakai [Source:UniProtKB/Swiss-Prot;Acc:Q9JIY2]
244058	ENSMUST00000139780	2.22874	0.00986896	UP	ENSMUSG00000070509	Q6PCX7	Rgma	Repulsive guidance molecule A [Source:UniProtKB/Swiss-Prot;Acc:Q6PCX7]
16835	ENSMUST00000034713	2.23212	0.0473966	UP	ENSMUSG00000032193	P35951	Ldlr	Low-density lipoprotein receptor [Source:UniProtKB/Swiss-Prot;Acc:P35951]
319653	ENSMUST00000199532	2.25722	0.0141163	UP	ENSMUSG00000054099	Q8BGP6	Slc25a40	Solute carrier family 25 member 40 [Source:UniProtKB/Swiss-Prot;Acc:Q8BGP6]
71602	ENSMUST00000214767	2.26031	0.0337799	UP	ENSMUSG00000032220	E9Q634	Myo1e	Unconventional myosin-Ie [Source:UniProtKB/Swiss-Prot;Acc:E9Q634]
13034	ENSMUST00000073350	2.26965	0.048515	UP	ENSMUSG00000004552	P70269	Ctse	cathepsin E [Source:MGI Symbol;Acc:MGI:107361]
18679	ENSMUST00000142534	2.28726	0.0241221	UP	ENSMUSG00000034055	P18826	Phka1	Phosphorylase b kinase regulatory subunit alpha, skeletal muscle isoform [Source:UniProtKB/Swiss-Prot;Acc:P18826]
243864	ENSMUST00000072386	2.29749	0.0201595	UP	ENSMUSG00000040987	Q8HWE6	Mill2	MHC I like leukocyte 2 [Source:MGI Symbol;Acc:MGI:2179989]
224903	ENSMUST00000183318	2.30527	0.0376989	UP	ENSMUSG00000071054	D3YXK2	Safb	Scaffold attachment factor B1 [Source:UniProtKB/Swiss-Prot;Acc:D3YXK2]
224024	ENSMUST00000012161	2.30754	0.0421454	UP	ENSMUSG00000012017	P59222	Scarf2	scavenger receptor class F, member 2
13717	ENSMUST00000015138	2.31558	0.0332515	UP	ENSMUSG00000029675	P54320	Eln	Elastin [Source:UniProtKB/Swiss-Prot;Acc:P54320]
57028	ENSMUST00000229803	2.32081	0.0217066	UP	ENSMUSG00000022436	Q6IS27	Sh3bp1	pyridoxal (pyridoxine, vitamin B6) phosphatase
22321	ENSMUST00000172637	2.33104	0.0229767	UP	ENSMUSG00000007029	Q790I0	Vars	valyl-tRNA synthetase [Source:MGI Symbol;Acc:MGI:90675]
14268	ENSMUST00000187938	2.33401	0.00151548	UP	ENSMUSG00000026193	P11276	Fn1	Fibronectin Anastellin [Source:UniProtKB/Swiss-Prot;Acc:P11276]
100637	ENSMUST00000202279	2.34309	0.0427246	UP	ENSMUSG00000041132	Q3V2Q8	N4bp2l1	NEDD4-binding protein 2-like 1 [Source:UniProtKB/Swiss-Prot;Acc:Q3V2Q8]
11980	ENSMUST00000135930	2.37683	0.0226836	UP	ENSMUSG00000037685	P70704	Atp8a1	Phospholipid-transporting ATPase IA [Source:UniProtKB/Swiss-Prot;Acc:P70704]
98828	ENSMUST00000150876	2.39136	0.0189836	UP	ENSMUSG00000039128	Q8CII2	Cdc123	Cell division cycle [Source:UniProtKB/Swiss-Prot;Acc:Q8CII2]
216190	ENSMUST00000130285	2.39918	0.00354302	UP	ENSMUSG00000020263	Q3TVI6	Appl2	DCC-interacting protein 13-beta [Source:UniProtKB/Swiss-Prot;Acc:Q8K3G9]
234378	ENSMUST00000066597	2.40418	0.0134576	UP	ENSMUSG00000055707	Q8BGY4	Klhl26	Kelch-like protein 26 [Source:UniProtKB/Swiss-Prot;Acc:Q8BGY4]
17686	ENSMUST00000190393	2.40909	0.000358487	UP	ENSMUSG00000014850	A0A087WQ16	Msh3	mutS homolog 3 [Source:HGNC Symbol;Acc:HGNC:7326]
67268	ENSMUST00000148960	2.41722	0.026129	UP	ENSMUSG00000024048	Q6ZWQ9	Myl12a	myosin, light chain 12A, regulatory, non-sarcomeric
67299	ENSMUST00000139152	2.42563	0.0248168	UP	ENSMUSG00000028556	A2A9M5	Dock7	dedicator of cytokinesis 7 [Source:HGNC Symbol;Acc:HGNC:19190]
22253	ENSMUST00000200114	2.43688	0.00968159	UP	ENSMUSG00000059921	O08747	Unc5c	unc-5 netrin receptor C [Source:MGI Symbol;Acc:MGI:1095412]
22780	ENSMUST00000140876	2.45247	0.00365403	UP	ENSMUSG00000018168	O08900	Ikzf3	Zinc finger protein Aiolos [Source:UniProtKB/Swiss-Prot;Acc:O08900]
11720	ENSMUST00000225720	2.45337	0.030121	UP	ENSMUSG00000037798	Q91X83	Mat1a	methionine adenosyltransferase I, alpha
12325	ENSMUST00000224887	2.45591	0.0397192	UP	ENSMUSG00000021820	Q8BW40	Camk2g	calcium/calmodulin-dependent protein kinase II gamma
213498	ENSMUST00000152006	2.45775	0.0447357	UP	ENSMUSG00000041977	Q68FM7	Arhgef11	Rho guanine nucleotide exchange factor (GEF) 11 [Source:MGI Symbol;Acc:MGI:2441869]
50492	ENSMUST00000166404	2.47058	0.0091296	UP	ENSMUSG00000004929	A0A0R4IZY0	Thop1	thimet oligopeptidase 1 [Source:MGI Symbol;Acc:MGI:1354165]
22235	ENSMUST00000125375	2.47314	8.22399e-05	UP	ENSMUSG00000029201	Q3TS38	Ugdh	UDP-glucose dehydrogenase [Source:MGI Symbol;Acc:MGI:1306785]
238276	ENSMUST00000095610	2.47425	0.0459298	UP	ENSMUSG00000021057	D3YVF0	Akap5	A-kinase anchor protein 5 [Source:UniProtKB/Swiss-Prot;Acc:D3YVF0]
170643	ENSMUST00000041732	2.47629	0.00273882	UP	ENSMUSG00000041734	Q80W68	Kirrel	Kin of IRRE-like protein 1 [Source:UniProtKB/Swiss-Prot;Acc:Q80W68]
18639	ENSMUST00000112713	2.47677	0.0138129	UP	ENSMUSG00000025271	A2AFM9	Pfkfb1	6-phosphofructo-2-kinase/fructose-2,6-biphosphatase 1 [Source:MGI Symbol;Acc:MGI:107816]
223601	ENSMUST00000228226	2.47768	0.0166483	UP	ENSMUSG00000022378	Q921M7	Fam49b	family with sequence similarity 49, member B
14115	ENSMUST00000137029	2.4901	0.0237697	UP	ENSMUSG00000064080	P37889	Fbln2	Fibulin-2 [Source:UniProtKB/Swiss-Prot;Acc:P37889]
20430	ENSMUST00000032629	2.4931	0.0210176	UP	ENSMUSG00000030447	Q7TMB8	Cyfip1	Cytoplasmic FMR1-interacting protein 1 [Source:UniProtKB/Swiss-Prot;Acc:Q7TMB8]
100503676	ENSMUST00000128400	2.49599	0.0301544	UP	ENSMUSG00000003812	S4R1G0,D3Z5U3,D3Z512,Q3UM14	Dnase2a	predicted gene, 38426
319170	ENSMUST00000091751	2.50238	0.036387	UP	ENSMUSG00000069309	P22752	Hist1h2an	Histone H2A type 1-B [Source:UniProtKB/Swiss-Prot;Acc:C0HKE1]
319469	ENSMUST00000165477	2.50758	0.0150441	UP	ENSMUSG00000021557	E9Q878,E9Q352,E9Q2R5,E9Q3T5,E9PXA7,Q8C1R2,Q80TL9,A0A286YDY7,Q641K1,F6ZCF0,E9PX07,A0A286YDV2,E9PYF9,A0A286YCK8	Agtpbp1	RIKEN cDNA A230056J06 gene
69202	ENSMUST00000032216	2.51299	0.0236367	UP	ENSMUSG00000030122	Q9D0J8	Ptms	Parathymosin [Source:UniProtKB/Swiss-Prot;Acc:Q9D0J8]
100561	ENSMUST00000031367	2.51414	0.0348673	UP	ENSMUSG00000029416	Q91W98	Slc15a4	Solute carrier family 15 member 4 [Source:UniProtKB/Swiss-Prot;Acc:Q91W98]
72318	ENSMUST00000231180	2.51522	0.0310978	UP	ENSMUSG00000018008	Q80YW0	Cyth4	cytohesin 4
319165	ENSMUST00000090776	2.51839	0.00668159	UP	ENSMUSG00000071478	B2RVF0	Hist1h2ad	Histone H2A type 1-B [Source:UniProtKB/Swiss-Prot;Acc:C0HKE1]
320209	ENSMUST00000223805	2.53439	0.0160678	UP	ENSMUSG00000035842	Q6AXC6	Ddx11	DEAD/H (Asp-Glu-Ala-Asp/His) box helicase 11
217030	ENSMUST00000184239	2.53524	0.0036305	UP	ENSMUSG00000034940	Q5SV85	Synrg	Synergin gamma [Source:UniProtKB/Swiss-Prot;Acc:Q5SV85]
22185	ENSMUST00000207523	2.54031	0.0274207	UP	ENSMUSG00000030435	P26369	U2af2	U2 small nuclear ribonucleoprotein auxiliary factor (U2AF) 2 [Source:MGI Symbol;Acc:MGI:98886]
66394	ENSMUST00000003513	2.54896	0.0420402	UP	ENSMUSG00000003421	Q9D6T0	Nosip	Nitric oxide synthase-interacting protein [Source:UniProtKB/Swiss-Prot;Acc:Q9D6T0]
69367	ENSMUST00000145571	2.5583	0.0173348	UP	ENSMUSG00000018196	Q923X4	Glrx2	Glutaredoxin-2, mitochondrial [Source:UniProtKB/Swiss-Prot;Acc:Q923X4]
233056	ENSMUST00000178162	2.55865	0.0236795	UP	ENSMUSG00000011427	Q80ZX2	Zfp790	zinc finger protein 790 [Source:MGI Symbol;Acc:MGI:1923431]
12816	ENSMUST00000121227	2.55941	0.000547429	UP	ENSMUSG00000032332	Q60847	Col12a1	Collagen alpha-1(XII) chain [Source:UniProtKB/Swiss-Prot;Acc:Q60847]
15356	ENSMUST00000134135	2.57668	0.00827651	UP	ENSMUSG00000028672	P38060	Hmgcl	Hydroxymethylglutaryl-CoA lyase, mitochondrial [Source:UniProtKB/Swiss-Prot;Acc:P38060]
229707	ENSMUST00000198424	2.57843	0.0272469	UP	ENSMUSG00000014601	Q3UGC1	Strip1	Striatin-interacting protein 1 [Source:UniProtKB/Swiss-Prot;Acc:Q8C079]
76223	ENSMUST00000115012	2.60194	0.0473533	UP	ENSMUSG00000038836	Q8CDP0	Agbl3	Cytosolic carboxypeptidase 3 [Source:UniProtKB/Swiss-Prot;Acc:Q8CDP0]
19663	ENSMUST00000191473	2.60318	0.00192046	UP	ENSMUSG00000031586	Q9WVB0	Rbpms	RNA-binding protein with multiple splicing [Source:UniProtKB/Swiss-Prot;Acc:Q9WVB0]
232566	ENSMUST00000095319	2.60893	0.0156131	UP	ENSMUSG00000068250	B8JKV0	Amn1	antagonist of mitotic exit network 1 [Source:MGI Symbol;Acc:MGI:2442933]
24059	ENSMUST00000035148	2.61063	0.0351575	UP	ENSMUSG00000032548	Q3TED0	Slco2a1	solute carrier organic anion transporter family, member 2a1 [Source:MGI Symbol;Acc:MGI:1346021]
270118	ENSMUST00000177755	2.61523	0.0140541	UP	ENSMUSG00000031925	Q8BYF1	Maml2	mastermind-like protein 2 isoform 1 [Source:RefSeq peptide;Acc:NP_001013835]
333088	ENSMUST00000101614	2.6332	0.0285285	UP	ENSMUSG00000059022	Q3U492	Kcp	Kielin/chordin-like protein [Source:UniProtKB/Swiss-Prot;Acc:Q3U492]
100710	ENSMUST00000016569	2.6344	0.044939	UP	ENSMUSG00000034021	Q4VA53	Pds5b	Mus musculus PDS5 cohesin associated factor B (Pds5b), transcript variant 2, mRNA. [Source:RefSeq mRNA;Acc:NM_001346503]
72318	ENSMUST00000230041	2.67195	0.0450922	UP	ENSMUSG00000018008	Q80YW0	Cyth4	cytohesin 4
67533	ENSMUST00000016631	2.67465	0.0155238	UP	ENSMUSG00000016487	Q8C8U0	Ppfibp1	PTPRF interacting protein, binding protein 1 (liprin beta 1) [Source:MGI Symbol;Acc:MGI:1914783]
20198	ENSMUST00000142476	2.67587	0.0310523	UP	ENSMUSG00000001020	P07091	S100a4	S100 calcium binding protein A4 [Source:MGI Symbol;Acc:MGI:1330282]
57349	ENSMUST00000031319	2.68015	0.000294428	UP	ENSMUSG00000029372	Q9EQI5	Ppbp	pro-platelet basic protein [Source:MGI Symbol;Acc:MGI:1888712]
16974	ENSMUST00000111950	2.71146	9.13705e-05	UP	ENSMUSG00000030201	O88572	Lrp6	LDL receptor related protein 6 [Source:HGNC Symbol;Acc:HGNC:6698]
20399	ENSMUST00000205340	2.74025	0.0270151	UP	ENSMUSG00000030733	Q91ZM2	Sh2b1	SH2B adapter protein 1 [Source:UniProtKB/Swiss-Prot;Acc:Q91ZM2]
11363	ENSMUST00000027153	2.77146	0.028162	UP	ENSMUSG00000026003	A0A0R4J083	Acadl	acyl-Coenzyme A dehydrogenase, long-chain [Source:MGI Symbol;Acc:MGI:87866]
16558	ENSMUST00000212106	2.7837	0.0469126	UP	ENSMUSG00000038844	B1AVY7	Kif16b	Kinesin-like protein KIF16B [Source:UniProtKB/Swiss-Prot;Acc:B1AVY7]
17973	ENSMUST00000112874	2.8071	0.0460549	UP	ENSMUSG00000032475	Q99M51	Nck1	Cytoplasmic protein NCK1 [Source:UniProtKB/Swiss-Prot;Acc:Q99M51]
216742	ENSMUST00000046835	2.81299	0.0299044	UP	ENSMUSG00000035992	Q68FD7	Fnip1	Folliculin-interacting protein 1 [Source:UniProtKB/Swiss-Prot;Acc:Q68FD7]
58237	ENSMUST00000151494	2.83678	0.018928	UP	ENSMUSG00000027574	Q9JMG4	Nkain4	Sodium/potassium-transporting ATPase subunit beta-1-interacting protein 4 [Source:UniProtKB/Swiss-Prot;Acc:Q9JMG4]
23922	ENSMUST00000029546	2.85352	0.0391932	UP	ENSMUSG00000027937	O88824	Jtb	jumping translocation breakpoint [Source:MGI Symbol;Acc:MGI:1346082]
108037	ENSMUST00000219239	2.86361	0.0187988	UP	ENSMUSG00000025403	Q3TFD0	Shmt2	serine hydroxymethyltransferase 2 (mitochondrial)
15369	ENSMUST00000004172	2.86704	0.035168	UP	ENSMUSG00000004070	Q544R7	Hmox2	Mus musculus heme oxygenase 2 (Hmox2), transcript variant 3, mRNA. [Source:RefSeq mRNA;Acc:NM_001357050]
210711	ENSMUST00000057557	2.87987	0.0405238	UP	ENSMUSG00000048170	Q8R3C0	Mcmbp	Mini-chromosome maintenance complex-binding protein [Source:UniProtKB/Swiss-Prot;Acc:Q8R3C0]
116939	ENSMUST00000045289	2.89291	0.001125	UP	ENSMUSG00000041653	E9QNZ9	Pnpla3	patatin-like phospholipase domain containing 3
320159	ENSMUST00000156665	2.89657	0.0280262	UP	ENSMUSG00000045761	Q3TYG6	Togaram2	TOG array regulator of axonemal microtubules protein 2 [Source:UniProtKB/Swiss-Prot;Acc:Q3TYG6]
18439	ENSMUST00000100737	2.9034	0.0101766	UP	ENSMUSG00000029468	C8YIX4	P2rx7	P2X purinoceptor 7 [Source:UniProtKB/Swiss-Prot;Acc:Q9Z1M0]
69562	ENSMUST00000222848	2.90739	0.0176447	UP	ENSMUSG00000041297	Q69ZA1	Cdk13	cyclin-dependent kinase 13
76260	ENSMUST00000139298	2.90854	0.00139246	UP	ENSMUSG00000021013	Q8VD72	Ttc8	tetratricopeptide repeat domain 8 [Source:MGI Symbol;Acc:MGI:1923510]
17067	ENSMUST00000185372	2.91212	0.0364595	UP	ENSMUSG00000079018	P0CW02	Ly6c1	Lymphocyte antigen 6C1 [Source:UniProtKB/Swiss-Prot;Acc:P0CW02]
18582	ENSMUST00000146220	2.91238	0.0152909	UP	ENSMUSG00000026239	Q3TDQ8	Pde6d	Retinal rod rhodopsin-sensitive cGMP 3',5'-cyclic phosphodiesterase subunit delta [Source:UniProtKB/Swiss-Prot;Acc:O55057]
69202	ENSMUST00000203422	2.91351	0.0396018	UP	ENSMUSG00000030122	Q9D0J8	Ptms	Parathymosin [Source:UniProtKB/Swiss-Prot;Acc:Q9D0J8]
319468	ENSMUST00000161371	2.92273	0.00828479	UP	ENSMUSG00000034613	Q3UYC0	Ppm1h	Protein phosphatase 1H [Source:UniProtKB/Swiss-Prot;Acc:Q3UYC0]
56419	ENSMUST00000227666	2.92637	0.0492938	UP	ENSMUSG00000022021	Q9Z207	Diaph3	diaphanous related formin 3
75725	ENSMUST00000133776	2.92968	0.0372466	UP	ENSMUSG00000029629	Q9D4H9	Phf14	PHD finger protein 14 [Source:MGI Symbol;Acc:MGI:1923539]
233064	ENSMUST00000132483	2.93949	0.00718638	UP	ENSMUSG00000037020	E9QK36	Wdr62	WD repeat domain 62 [Source:MGI Symbol;Acc:MGI:1923696]
14168	ENSMUST00000150413	2.95274	0.0479468	UP	ENSMUSG00000031137	P70377	Fgf13	Mus musculus fibroblast growth factor 13 (Fgf13), transcript variant 4, mRNA. [Source:RefSeq mRNA;Acc:NM_001356335]
22780	ENSMUST00000153902	2.95319	0.0153235	UP	ENSMUSG00000018168	O08900	Ikzf3	Zinc finger protein Aiolos [Source:UniProtKB/Swiss-Prot;Acc:O08900]
244667	ENSMUST00000122389	2.95953	0.036918	UP	ENSMUSG00000043051	Q811T9	Disc1	Disrupted in schizophrenia 1 homolog [Source:UniProtKB/Swiss-Prot;Acc:Q811T9]
21388	ENSMUST00000202723	2.96339	0.0220703	UP	ENSMUSG00000018263	P70326	Tbx5	T-box 5 [Source:MGI Symbol;Acc:MGI:102541]
73998	ENSMUST00000204196	2.96863	0.0157993	UP	ENSMUSG00000029804	Q8CFQ0	Herc3	HECT and RLD domain containing E3 ubiquitin protein ligase 3 [Source:HGNC Symbol;Acc:HGNC:4876]
140481	ENSMUST00000098346	2.97276	0.0325113	UP	ENSMUSG00000038886	Q197W7	Man2a2	Alpha-mannosidase 2x [Source:UniProtKB/Swiss-Prot;Acc:Q8BRK9]
213827	ENSMUST00000217199	3.00555	0.000114142	UP	ENSMUSG00000032096	Q5XJY5	Arcn1	Coatomer subunit delta [Source:UniProtKB/Swiss-Prot;Acc:Q5XJY5]
77057	ENSMUST00000137138	3.00934	0.0374142	UP	ENSMUSG00000033855	Q8CDJ8	Ston1	Stonin-1 [Source:UniProtKB/Swiss-Prot;Acc:Q8CDJ8]
381319	ENSMUST00000191621	3.02344	0.0365986	UP	ENSMUSG00000026630	Q9D275	Batf3	Basic leucine zipper transcriptional factor ATF-like 3 [Source:UniProtKB/Swiss-Prot;Acc:Q9D275]
71326	ENSMUST00000223968	3.02854	0.000315709	UP	ENSMUSG00000023993	Q8K558	Treml1	triggering receptor expressed on myeloid cells-like 1
18476	ENSMUST00000140093	3.05718	0.000371667	UP	ENSMUSG00000005447	Q3TJC2	Pafah1b3	Platelet-activating factor acetylhydrolase IB subunit gamma [Source:UniProtKB/Swiss-Prot;Acc:Q61205]
75089	ENSMUST00000020112	3.06138	0.0166369	UP	ENSMUSG00000019951	Q9D574	Uhrf1bp1l	UHRF1 (ICBP90) binding protein 1-like
83946	ENSMUST00000190774	3.06707	0.0187193	UP	ENSMUSG00000032253	F8VQ93	Phip	pleckstrin homology domain interacting protein [Source:HGNC Symbol;Acc:HGNC:15673]
74513	ENSMUST00000109686	3.07884	0.00698794	UP	ENSMUSG00000036902	Q8BNJ6	Neto2	Mus musculus neuropilin (NRP) and tolloid (TLL)-like 2 (Neto2), transcript variant 1, mRNA. [Source:RefSeq mRNA;Acc:NM_001357287]
16543	ENSMUST00000125326	3.10882	4.43112e-05	UP	ENSMUSG00000041390	Q8BX65	Mdfic	MyoD family inhibitor domain-containing protein [Source:UniProtKB/Swiss-Prot;Acc:Q8BX65]
14694	ENSMUST00000136703	3.10982	0.000947261	UP	ENSMUSG00000020372	P68040	Rack1	Receptor of activated protein C kinase 1 Receptor of activated protein C kinase 1, N-terminally processed [Source:UniProtKB/Swiss-Prot;Acc:P68040]
320487	ENSMUST00000220369	3.12036	0.00766066	UP	ENSMUSG00000035181	Q5PRF0	Heatr5a	HEAT repeat containing 5A
57442	ENSMUST00000170954	3.12861	0.00373078	UP	ENSMUSG00000035165	Q9WTW2	Kcne3	Potassium voltage-gated channel subfamily E member 3 [Source:UniProtKB/Swiss-Prot;Acc:Q9WTW2]
13518	ENSMUST00000183006	3.13313	0.0164827	UP	ENSMUSG00000026131	Q91ZU6	Dst	Dystonin [Source:UniProtKB/Swiss-Prot;Acc:Q91ZU6]
68292	ENSMUST00000035010	3.13554	0.0171186	UP	ENSMUSG00000032437	A0A0R4J0D3	Stt3b	STT3, subunit of the oligosaccharyltransferase complex, homolog B (S. cerevisiae) [Source:MGI Symbol;Acc:MGI:1915542]
621976	ENSMUST00000221694	3.16992	0.0291689	UP	ENSMUSG00000087370	P86050	Tmem170b	transmembrane protein 170B
347722	ENSMUST00000074945	3.18496	0.0493082	UP	ENSMUSG00000055013	Q8BXK8	Agap1	Arf-GAP with GTPase, ANK repeat and PH domain-containing protein 1 [Source:UniProtKB/Swiss-Prot;Acc:Q8BXK8]
68842	ENSMUST00000039655	3.18659	0.0360623	UP	ENSMUSG00000034377	Q9JIL5	Tulp4	tubby like protein 4 [Source:MGI Symbol;Acc:MGI:1916092]
227634	ENSMUST00000151593	3.18879	0.0354855	UP	ENSMUSG00000026933	A0A0A0MQE5	Camsap1	Calmodulin-regulated spectrin-associated protein 1 [Source:UniProtKB/Swiss-Prot;Acc:A2AHC3]
16201	ENSMUST00000214200	3.19415	0.0102594	UP	ENSMUSG00000032178	Q9Z1X4	Ilf3	Interleukin enhancer-binding factor 3 [Source:UniProtKB/Swiss-Prot;Acc:Q9Z1X4]
14088	ENSMUST00000159024	3.22445	0.00467933	UP	ENSMUSG00000021461	Q8CBR3	Fancc	Mus musculus Fanconi anemia, complementation group C (Fancc), transcript variant 4, mRNA. [Source:RefSeq mRNA;Acc:NM_001347514]
69940	ENSMUST00000132807	3.24027	0.008024	UP	ENSMUSG00000036435	Q8R3S6	Exoc1	Mus musculus exocyst complex component 1 (Exoc1), transcript variant 5, mRNA. [Source:RefSeq mRNA;Acc:NM_001359372]
70394	ENSMUST00000130170	3.24311	0.0143673	UP	ENSMUSG00000006021	G3X8R1	Kptn	kaptin, actin binding protein [Source:HGNC Symbol;Acc:HGNC:6404]
21417	ENSMUST00000025081	3.24631	0.0355861	UP	ENSMUSG00000024238	Q64318	Zeb1	zinc finger E-box binding homeobox 1 [Source:MGI Symbol;Acc:MGI:1344313]
12006	ENSMUST00000139682	3.25771	0.0150514	UP	ENSMUSG00000000142	O88566	Axin2	Axin-2 [Source:UniProtKB/Swiss-Prot;Acc:O88566]
110385	ENSMUST00000110095	3.26624	0.0051206	UP	ENSMUSG00000031842	Q3UEI1	Pde4c	cAMP-specific 3',5'-cyclic phosphodiesterase 4C [Source:UniProtKB/Swiss-Prot;Acc:Q3UEI1]
13106	ENSMUST00000026552	3.26911	0.00558488	UP	ENSMUSG00000025479	Q05421	Cyp2e1	Cytochrome P450 2E1 [Source:UniProtKB/Swiss-Prot;Acc:Q05421]
16186	ENSMUST00000127538	3.28445	0.0281069	UP	ENSMUSG00000031304	P34902	Il2rg	Cytokine receptor common subunit gamma [Source:UniProtKB/Swiss-Prot;Acc:P34902]
19089	ENSMUST00000215795	3.3064	0.010498	UP	ENSMUSG00000003402	O08795	Prkcsh	protein kinase C substrate 80K-H [Source:MGI Symbol;Acc:MGI:107877]
11504	ENSMUST00000023610	3.31762	5.62764e-06	UP	ENSMUSG00000022893	Q3TQF7	Adamts1	A disintegrin and metalloproteinase with thrombospondin motifs 1 [Source:UniProtKB/Swiss-Prot;Acc:P97857]
667742	ENSMUST00000047480	3.32644	0.0252709	UP	ENSMUSG00000041482	E9QNW4	Piezo2	Piezo-type mechanosensitive ion channel component 2 [Source:UniProtKB/Swiss-Prot;Acc:Q8CD54]
69035	ENSMUST00000130717	3.37222	0.0257706	UP	ENSMUSG00000025786	Q8R173	Zdhhc3	zinc finger, DHHC domain containing 3 [Source:MGI Symbol;Acc:MGI:1926134]
21975	ENSMUST00000102668	3.38231	0.0316251	UP	ENSMUSG00000002814	O70157	Top3a	topoisomerase (DNA) III alpha [Source:MGI Symbol;Acc:MGI:1197527]
99712	ENSMUST00000141525	3.39245	0.00331893	UP	ENSMUSG00000040774	Q8BGS7	Cept1	Mus musculus choline/ethanolaminephosphotransferase 1 (Cept1), transcript variant 3, mRNA. [Source:RefSeq mRNA;Acc:NM_001357818]
71421	ENSMUST00000073363	3.43361	0.0370876	UP	ENSMUSG00000029282	Q9D3J8	Amtn	Amelotin [Source:UniProtKB/Swiss-Prot;Acc:Q9D3J8]
75729	ENSMUST00000231122	3.43938	0.0242017	UP	ENSMUSG00000042564	Q9D3V8	Fam227a	family with sequence similarity 227, member A
67241	ENSMUST00000218319	3.44018	0.000172486	UP	ENSMUSG00000020608	Q924W5	Smc6	structural maintenance of chromosomes 6
74772	ENSMUST00000135117	3.45265	0.0237614	UP	ENSMUSG00000036622	Q9CTG6	Atp13a2	Cation-transporting ATPase 13A2 [Source:UniProtKB/Swiss-Prot;Acc:Q9CTG6]
64383	ENSMUST00000141077	3.48054	0.0126565	UP	ENSMUSG00000015149	Q8VDQ8	Sirt2	NAD-dependent protein deacetylase sirtuin-2 [Source:UniProtKB/Swiss-Prot;Acc:Q8VDQ8]
30795	ENSMUST00000222467	3.48921	0.0236592	UP	ENSMUSG00000020949	Q62446	Fkbp3	FK506 binding protein 3
104732	ENSMUST00000196505	3.49402	0.0329639	UP	ENSMUSG00000037466	Q3UK37	Tedc1	tubulin epsilon and delta complex 1 [Source:MGI Symbol;Acc:MGI:2144738]
93671	ENSMUST00000203210	3.49432	0.0497794	UP	ENSMUSG00000008845	Q2VLH6	Cd163	Scavenger receptor cysteine-rich type 1 protein M130 Soluble CD163 [Source:UniProtKB/Swiss-Prot;Acc:Q2VLH6]
53609	ENSMUST00000207264	3.49649	0.0191822	UP	ENSMUSG00000061028	Q8CFC7	Clasrp	CLK4-associating serine/arginine rich protein [Source:UniProtKB/Swiss-Prot;Acc:Q8CFC7]
212514	ENSMUST00000133168	3.50149	0.0431924	UP	ENSMUSG00000043065	Q8C804	Spice1	Spindle and centriole-associated protein 1 [Source:UniProtKB/Swiss-Prot;Acc:Q8C804]
105847	ENSMUST00000229308	3.51227	0.029566	UP	ENSMUSG00000022614	Q8C3X8	Lmf2	lipase maturation factor 2
56788	ENSMUST00000106729	3.52995	0.0247915	UP	ENSMUSG00000007279	D3YVM9	Scube2	Signal peptide, CUB and EGF-like domain-containing protein 2 [Source:UniProtKB/Swiss-Prot;Acc:Q9JJS0]
71795	ENSMUST00000146680	3.53683	0.038251	UP	ENSMUSG00000040430	Q8K4R4	Pitpnc1	Cytoplasmic phosphatidylinositol transfer protein 1 [Source:UniProtKB/Swiss-Prot;Acc:Q8K4R4]
192188	ENSMUST00000035288	3.56271	0.000692637	UP	ENSMUSG00000035459	E5RKF9	Stab2	stabilin 2
234839	ENSMUST00000067252	3.5871	0.00427913	UP	ENSMUSG00000014444	E9PUQ9	Piezo1	Mus musculus piezo-type mechanosensitive ion channel component 1 (Piezo1), transcript variant 1, mRNA. [Source:RefSeq mRNA;Acc:NM_001357349]
-	ENSMUST00000179436	3.59387	0.00800927	UP	ENSMUSG00000095742	-	CAAA01147332.1	-
60534	ENSMUST00000133915	3.62561	0.0136089	UP	ENSMUSG00000028453	Q9EQR6	Fancg	Fanconi anemia group G protein homolog [Source:UniProtKB/Swiss-Prot;Acc:Q9EQR6]
67345	ENSMUST00000219177	3.63414	0.0275336	UP	ENSMUSG00000020064	Q6PAV2	Herc4	hect domain and RLD 4
210297	ENSMUST00000137665	3.65594	0.0479742	UP	ENSMUSG00000031290	Q3UMG5	Lrch2	Leucine-rich repeat and calponin homology domain-containing protein 2 [Source:UniProtKB/Swiss-Prot;Acc:Q3UMG5]
14123	ENSMUST00000205432	3.66547	0.0287859	UP	ENSMUSG00000042423	Q8R089	Fbrs	Probable fibrosin-1 [Source:UniProtKB/Swiss-Prot;Acc:Q8R089]
107747	ENSMUST00000130418	3.67567	0.000691548	UP	ENSMUSG00000030088	Q8R0Y6	Aldh1l1	Mus musculus aldehyde dehydrogenase 1 family, member L1 (Aldh1l1), transcript variant 2, mRNA. [Source:RefSeq mRNA;Acc:NM_001356412]
109778	ENSMUST00000135529	3.68279	0.0141156	UP	ENSMUSG00000001999	Q9CY64	Blvra	Biliverdin reductase A [Source:UniProtKB/Swiss-Prot;Acc:Q9CY64]
17083	ENSMUST00000213316	3.69032	0.0300263	UP	ENSMUSG00000032180	Q3V009	Tmed1	transmembrane p24 trafficking protein 1 [Source:MGI Symbol;Acc:MGI:106201]
13346	ENSMUST00000144894	3.69088	0.0392553	UP	ENSMUSG00000026208	Q3V1K9	Des	Desmin [Source:UniProtKB/Swiss-Prot;Acc:P31001]
110075	ENSMUST00000197143	3.70406	0.0350267	UP	ENSMUSG00000029335	Q8BHE5	Bmp3	Bone morphotic protein 3 [Source:UniProtKB/Swiss-Prot;Acc:Q8BHE5]
14104	ENSMUST00000055655	3.72286	0.0477602	UP	ENSMUSG00000025153	P19096	Fasn	Fatty acid synthase [Acyl-carrier-protein] S-acetyltransferase [Acyl-carrier-protein] S-malonyltransferase 3-oxoacyl-[acyl-carrier-protein] synthase 3-oxoacyl-[acyl-carrier-protein] reductase 3-hydroxyacyl-[acyl-carrier-protein] dehydratase Enoyl-[acyl-carrier-protein] reductase Oleoyl-[acyl-carrier-protein] hydrolase [Source:UniProtKB/Swiss-Prot;Acc:P19096]
240067	ENSMUST00000141815	3.73045	0.0145242	UP	ENSMUSG00000053390	B0V2W4	Zfp952	zinc finger protein 952 [Source:MGI Symbol;Acc:MGI:2441928]
213827	ENSMUST00000215140	3.73605	5.03923e-05	UP	ENSMUSG00000032096	Q5XJY5	Arcn1	Coatomer subunit delta [Source:UniProtKB/Swiss-Prot;Acc:Q5XJY5]
100125263	ENSMUST00000103299	3.7367	0.000550482	UP	ENSMUSG00000076498	A0A075B5J4	Trbc2	T cell receptor beta, constant 2
319168	ENSMUST00000091742	3.73737	0.0350873	UP	ENSMUSG00000069302	Q8CGP6	Hist1h2ah	Histone H2A type 1-H [Source:UniProtKB/Swiss-Prot;Acc:Q8CGP6]
21416	ENSMUST00000111653	3.74175	0.015899	UP	ENSMUSG00000024985	E9QQ91	Tcf7l2	transcription factor 7 like 2, T cell specific, HMG box [Source:MGI Symbol;Acc:MGI:1202879]
80285	ENSMUST00000114877	3.74311	0.0451316	UP	ENSMUSG00000022906	Q8CAS9	Parp9	Poly [ADP-ribose] polymerase 9 [Source:UniProtKB/Swiss-Prot;Acc:Q8CAS9]
11514	ENSMUST00000023007	3.74778	0.00131443	UP	ENSMUSG00000022376	Q3UUN2	Adcy8	adenylate cyclase 8
110611	ENSMUST00000042498	3.74866	0.0448302	UP	ENSMUSG00000034088	Q3U4Z7	Hdlbp	Mus musculus high density lipoprotein (HDL) binding protein (Hdlbp), transcript variant 3, mRNA. [Source:RefSeq mRNA;Acc:NM_001357556]
319944	ENSMUST00000041733	3.77211	0.0161842	UP	ENSMUSG00000037343	B9EJX5	Taf2	TATA-box binding protein associated factor 2
27414	ENSMUST00000216505	3.79566	0.0461903	UP	ENSMUSG00000030839	Q80YD6	Sergef	Secretion-regulating guanine nucleotide exchange factor [Source:UniProtKB/Swiss-Prot;Acc:Q80YD6]
12955	ENSMUST00000217475	3.80135	0.0413578	UP	ENSMUSG00000032060	Q52L78	Cryab	Alpha-crystallin B chain [Source:UniProtKB/Swiss-Prot;Acc:P23927]
19013	ENSMUST00000138813	3.80387	0.0111832	UP	ENSMUSG00000022383	P23204	Ppara	peroxisome proliferator activated receptor alpha [Source:MGI Symbol;Acc:MGI:104740]
18612	ENSMUST00000017868	3.80735	0.043618	UP	ENSMUSG00000017724	A6MDC6	Etv4	ETS translocation variant 4 [Source:UniProtKB/Swiss-Prot;Acc:P28322]
107885	ENSMUST00000209568	3.82818	0.00786563	UP	ENSMUSG00000066442	Q9D110	Mthfs	5-formyltetrahydrofolate cyclo-ligase [Source:UniProtKB/Swiss-Prot;Acc:Q9D110]
68147	ENSMUST00000143545	3.84226	0.0443258	UP	ENSMUSG00000028010	Q9CY66	Gar1	H/ACA ribonucleoprotein complex subunit 1 [Source:UniProtKB/Swiss-Prot;Acc:Q9CY66]
68743	ENSMUST00000215006	3.8461	0.034182	UP	ENSMUSG00000036777	Q8K298	Anln	Anillin [Source:UniProtKB/Swiss-Prot;Acc:Q8K298]
18786	ENSMUST00000136669	3.84701	0.0470347	UP	ENSMUSG00000028577	P27612	Plaa	Phospholipase A-2-activating protein [Source:UniProtKB/Swiss-Prot;Acc:P27612]
17260	ENSMUST00000199167	3.84951	0.0389825	UP	ENSMUSG00000005583	Q8CFN5	Mef2c	Mus musculus myocyte enhancer factor 2C (Mef2c), transcript variant 14, mRNA. [Source:RefSeq mRNA;Acc:NM_001347577]
234582	ENSMUST00000162020	3.86401	0.0484291	UP	ENSMUSG00000063605	B2RTE5	Ccdc102a	Coiled-coil domain-containing protein 102A [Source:UniProtKB/Swiss-Prot;Acc:Q3TMW1]
74735	ENSMUST00000102924	3.88191	0.0240976	UP	ENSMUSG00000039853	Q14AR3	Trim14	tripartite motif-containing 14 [Source:MGI Symbol;Acc:MGI:1921985]
102115	ENSMUST00000072751	3.89117	0.00099244	UP	ENSMUSG00000078440	Q99LN9	Dohh	Deoxyhypusine hydroxylase [Source:UniProtKB/Swiss-Prot;Acc:Q99LN9]
59024	ENSMUST00000137664	3.90269	0.000781896	UP	ENSMUSG00000079487	Q2NLB9	Med12	Mediator of RNA polymerase II transcription subunit 12 [Source:UniProtKB/Swiss-Prot;Acc:A2AGH6]
26942	ENSMUST00000171205	3.93578	0.0378069	UP	ENSMUSG00000037617	Q80ZX8	Spag1	sperm associated antigen 1
104394	ENSMUST00000015003	3.94044	0.00501752	UP	ENSMUSG00000014859	Q8R0K9	E2f4	Transcription factor E2F4 [Source:UniProtKB/Swiss-Prot;Acc:Q8R0K9]
74504	ENSMUST00000137705	3.94509	0.0278386	UP	ENSMUSG00000037339	Q8R2K2	Fam53a	Mus musculus family with sequence similarity 53, member A (Fam53a), transcript variant 3, mRNA. [Source:RefSeq mRNA;Acc:NM_001359462]
105988	ENSMUST00000229050	3.96442	0.0497759	UP	ENSMUSG00000058290	P60330	Espl1	extra spindle pole bodies 1, separase
74388	ENSMUST00000034960	3.96948	0.0446851	UP	ENSMUSG00000032393	Q80YA7	Dpp8	Dipeptidyl peptidase 8 [Source:UniProtKB/Swiss-Prot;Acc:Q80YA7]
12395	ENSMUST00000098256	3.97113	0.015126	UP	ENSMUSG00000006586	B1AXH9	Runx1t1	runt-related transcription factor 1; translocated to, 1 (cyclin D-related) [Source:MGI Symbol;Acc:MGI:104793]
319172	ENSMUST00000078369	3.98558	0.042197	UP	ENSMUSG00000061615	B2RVF0	Hist1h2ab	Histone H2A type 1-B [Source:UniProtKB/Swiss-Prot;Acc:C0HKE1]
19164	ENSMUST00000223542	4.02054	0.0451148	UP	ENSMUSG00000019969	P49769	Psen1	presenilin 1
77090	ENSMUST00000002469	4.03209	0.00174618	UP	ENSMUSG00000002396	Q8VCR9	Ocel1	occludin/ELL domain containing 1 [Source:MGI Symbol;Acc:MGI:1924340]
70693	ENSMUST00000198868	4.04785	0.0410951	UP	ENSMUSG00000029090	Q7TT36	Adgra3	Adhesion G protein-coupled receptor A3 [Source:UniProtKB/Swiss-Prot;Acc:Q7TT36]
240057	ENSMUST00000202208	4.05791	0.0178845	UP	ENSMUSG00000067629	F6SEU4	Syngap1	Ras/Rap GTPase-activating protein SynGAP [Source:UniProtKB/Swiss-Prot;Acc:F6SEU4]
14026	ENSMUST00000223548	4.06791	0.0149509	UP	ENSMUSG00000021262	Q6PB99	Evl	Ena-vasodilator stimulated phosphoprotein
12445	ENSMUST00000183177	4.0705	0.0419382	UP	ENSMUSG00000034165	P30282	Ccnd3	G1/S-specific cyclin-D3 [Source:UniProtKB/Swiss-Prot;Acc:P30282]
107375	ENSMUST00000125114	4.07299	0.0358667	UP	ENSMUSG00000024818	Q8CFJ7	Slc25a45	Solute carrier family 25 member 45 [Source:UniProtKB/Swiss-Prot;Acc:Q8CFJ7]
72949	ENSMUST00000153359	4.07453	0.0353775	UP	ENSMUSG00000026349	Q7TQK0	Ccnt2	Cyclin-T2 [Source:UniProtKB/Swiss-Prot;Acc:Q7TQK0]
26921	ENSMUST00000191964	4.09049	0.0366526	UP	ENSMUSG00000026074	A0A0A6YWR8	Map4k4	mitogen-activated protein kinase kinase kinase kinase 4 [Source:MGI Symbol;Acc:MGI:1349394]
67270	ENSMUST00000218996	4.11058	0.0270466	UP	ENSMUSG00000062981	Q9CPV3	Mrpl42	mitochondrial ribosomal protein L42
12850	ENSMUST00000098090	4.11173	0.0176813	UP	ENSMUSG00000030652	P97478	Coq7	5-demethoxyubiquinone hydroxylase, mitochondrial [Source:UniProtKB/Swiss-Prot;Acc:P97478]
20054	ENSMUST00000062674	4.13389	0.014499	UP	ENSMUSG00000063457	P62843	Rps15	40S ribosomal protein S15 [Source:UniProtKB/Swiss-Prot;Acc:P62843]
73122	ENSMUST00000187525	4.14792	0.0448629	UP	ENSMUSG00000070939	Q3UR70	Tgfbrap1	Mus musculus transforming growth factor, beta receptor associated protein 1 (Tgfbrap1), transcript variant 2, mRNA. [Source:RefSeq mRNA;Acc:NM_001357299]
12505	ENSMUST00000111191	4.16621	0.0361267	UP	ENSMUSG00000005087	P15379	Cd44	CD44 molecule (Indian blood group) [Source:HGNC Symbol;Acc:HGNC:1681]
66314	ENSMUST00000184849	4.17896	0.0100625	UP	ENSMUSG00000000827	Q9CYZ2	Tpd52l2	tumor protein D52-like 2 [Source:MGI Symbol;Acc:MGI:1913564]
30050	ENSMUST00000150865	4.18482	0.0220675	UP	ENSMUSG00000035949	Q9QUH1	Fbxw2	F-box and WD repeat domain containing 2 [Source:HGNC Symbol;Acc:HGNC:13608]
17194	ENSMUST00000225792	4.19092	0.0246146	UP	ENSMUSG00000037780	P39039	Mbl1	mannose-binding lectin (protein A) 1
100041621,100041574	ENSMUST00000227545	4.19507	0.033148	UP	ENSMUSG00000036552	F6UWZ4,Q8C5D3	Ermard	predicted gene 3435
57370	ENSMUST00000129985	4.19901	0.0314572	UP	ENSMUSG00000052423	Q3U260	B4galt3	Beta-1,4-galactosyltransferase 3 N-acetyllactosamine synthase Beta-N-acetylglucosaminylglycopeptide beta-1,4-galactosyltransferase Beta-N-acetylglucosaminyl-glycolipid beta-1,4-galactosyltransferase [Source:UniProtKB/Swiss-Prot;Acc:Q91YY2]
230674	ENSMUST00000106406	4.20091	0.000550537	UP	ENSMUSG00000033326	Q8BW72	Kdm4a	Lysine-specific demethylase 4A [Source:UniProtKB/Swiss-Prot;Acc:Q8BW72]
22668	ENSMUST00000144409	4.21143	0.031763	UP	ENSMUSG00000024949	Q3UI45	Sf1	Splicing factor 1 [Source:UniProtKB/Swiss-Prot;Acc:Q64213]
23922	ENSMUST00000157045	4.21901	0.0260892	UP	ENSMUSG00000027937	O88824	Jtb	jumping translocation breakpoint [Source:MGI Symbol;Acc:MGI:1346082]
65967	ENSMUST00000205014	4.22557	0.0307072	UP	ENSMUSG00000033216	Q9JHW4	Eefsec	Selenocysteine-specific elongation factor [Source:UniProtKB/Swiss-Prot;Acc:Q9JHW4]
70315	ENSMUST00000087916	4.25886	0.0339316	UP	ENSMUSG00000067567	Q8VH37	Hdac8	Histone deacetylase 8 [Source:UniProtKB/Swiss-Prot;Acc:Q8VH37]
53761	ENSMUST00000174805	4.2603	0.0239722	UP	ENSMUSG00000024393	Q7TSC1	Prrc2a	Protein PRRC2A [Source:UniProtKB/Swiss-Prot;Acc:Q7TSC1]
20384	ENSMUST00000138434	4.2612	0.0492432	UP	ENSMUSG00000021134	O35326	Srsf5	serine/arginine-rich splicing factor 5 [Source:MGI Symbol;Acc:MGI:98287]
17165	ENSMUST00000031410	4.2662	0.0164353	UP	ENSMUSG00000029454	O54992	Mapkapk5	MAP kinase-activated protein kinase 5 [Source:UniProtKB/Swiss-Prot;Acc:O54992]
14183	ENSMUST00000120187	4.27135	0.035323	UP	ENSMUSG00000030849	P21803	Fgfr2	fibroblast growth factor receptor 2 isoform 3 [Source:RefSeq peptide;Acc:NP_001334567]
15469	ENSMUST00000207735	4.27499	0.000560396	UP	ENSMUSG00000109324	Q9JIF0	Prmt1	protein arginine N-methyltransferase 1 [Source:MGI Symbol;Acc:MGI:107846]
66980	ENSMUST00000223807	4.28282	0.000307828	UP	ENSMUSG00000024982	Q9CPV7	Zdhhc6	zinc finger, DHHC domain containing 6
238023	ENSMUST00000131009	4.28745	0.0475178	UP	ENSMUSG00000039307	Q3U4H6	Hexdc	Hexosaminidase D [Source:UniProtKB/Swiss-Prot;Acc:Q3U4H6]
353242	ENSMUST00000155870	4.29292	0.0158592	UP	ENSMUSG00000024829	Q9D1N9	Mrpl21	39S ribosomal protein L21, mitochondrial [Source:UniProtKB/Swiss-Prot;Acc:Q9D1N9]
69662	ENSMUST00000148721	4.29986	0.031026	UP	ENSMUSG00000050705	B8JJ69	2310061I04Rik	RIKEN cDNA 2310061I04 gene [Source:MGI Symbol;Acc:MGI:1916912]
107527	ENSMUST00000193388	4.3068	0.0491789	UP	ENSMUSG00000070942	Q9ERS7	Il1rl2	Mus musculus interleukin 1 receptor-like 2 (Il1rl2), transcript variant 2, mRNA. [Source:RefSeq mRNA;Acc:NM_001356478]
66505	ENSMUST00000128658	4.31592	0.0114039	UP	ENSMUSG00000021156	Q3UKS1	Zmynd11	zinc finger, MYND domain containing 11 [Source:MGI Symbol;Acc:MGI:1913755]
277345	ENSMUST00000109336	4.31969	0.00438525	UP	ENSMUSG00000070530	A2A5H4	Wfdc16	WAP four-disulfide core domain 16 [Source:MGI Symbol;Acc:MGI:2670994]
109331	ENSMUST00000132782	4.32922	0.0315235	UP	ENSMUSG00000028309	Q5DTM8	Rnf20	ring finger protein 20 [Source:MGI Symbol;Acc:MGI:1925927]
73242	ENSMUST00000141662	4.33816	0.026097	UP	ENSMUSG00000024426	Q8K341	Atat1	Mus musculus alpha tubulin acetyltransferase 1 (Atat1), transcript variant 5, mRNA. [Source:RefSeq mRNA;Acc:NM_001357865]
18846	ENSMUST00000137484	4.34635	0.0476464	UP	ENSMUSG00000031398	P70208	Plxna3	plexin A3 [Source:MGI Symbol;Acc:MGI:107683]
67581	ENSMUST00000227359	4.34704	0.0229864	UP	ENSMUSG00000022749	Q8K0F1	Tbc1d23	TBC1 domain family, member 23
66462	ENSMUST00000135773	4.34765	0.00377518	UP	ENSMUSG00000058833	Q9CYZ6	Rex1bd	Uncharacterized [Source:UniProtKB/Swiss-Prot;Acc:Q9CYZ6]
14797	ENSMUST00000220348	4.35788	0.00175295	UP	ENSMUSG00000054452	Q3TYD9	Aes	amino-terminal enhancer of split
18761	ENSMUST00000195628	4.37168	0.00100049	UP	ENSMUSG00000026778	A6H667	Prkcq	protein kinase C, theta [Source:MGI Symbol;Acc:MGI:97601]
68957	ENSMUST00000147818	4.37284	0.0387077	UP	ENSMUSG00000041423	Q0VBT6	Paqr6	progestin and adipoQ receptor family member VI [Source:MGI Symbol;Acc:MGI:1916207]
269593	ENSMUST00000001116	4.38174	0.0398709	UP	ENSMUSG00000001089	Q8R4U7	Luzp1	Leucine zipper protein 1 [Source:UniProtKB/Swiss-Prot;Acc:Q8R4U7]
66136	ENSMUST00000174466	4.40538	0.048418	UP	ENSMUSG00000036315	Q791N7	Znrd1	zinc ribbon domain containing, 1 [Source:MGI Symbol;Acc:MGI:1913386]
19280	ENSMUST00000225381	4.42844	0.00467314	UP	ENSMUSG00000013236	B0V2N1	Ptprs	Receptor-type tyrosine-protein phosphatase S [Source:UniProtKB/Swiss-Prot;Acc:B0V2N1]
106795	ENSMUST00000160885	4.43438	0.0332734	UP	ENSMUSG00000050410	G3XA31	Tcf19	transcription factor 19 [Source:MGI Symbol;Acc:MGI:103180]
381668	ENSMUST00000200293	4.44218	0.0106746	UP	ENSMUSG00000043323	E9Q9T0	Fbrsl1	fibrosin-1-like protein isoform 3 [Source:RefSeq peptide;Acc:NP_001303971]
74195	ENSMUST00000224743	4.4598	0.000549254	UP	ENSMUSG00000022031	Q9CZX0	Elp3	elongator acetyltransferase complex subunit 3
246277	ENSMUST00000229770	4.46968	0.00291232	UP	ENSMUSG00000023044	Q9DBE0	Csad	cysteine sulfinic acid decarboxylase
18022	ENSMUST00000154510	4.48656	0.0217531	UP	ENSMUSG00000058794	A0A0R4J0Y5	Nfe2	nuclear factor, erythroid 2 [Source:HGNC Symbol;Acc:HGNC:7780]
17684	ENSMUST00000038107	4.49691	3.05299e-05	UP	ENSMUSG00000039910	O35740	Cited2	Cbp/p300-interacting transactivator, with Glu/Asp-rich carboxy-terminal domain, 2
233186	ENSMUST00000122423	4.49885	0.0488794	UP	ENSMUSG00000039013	Q920G3	Siglec5	Sialic acid-binding Ig-like lectin 5 [Source:UniProtKB/Swiss-Prot;Acc:Q920G3]
233208	ENSMUST00000211680	4.50622	0.0128649	UP	ENSMUSG00000038406	Q5U4C3	Scaf1	Splicing factor, arginine/serine-rich 19 [Source:UniProtKB/Swiss-Prot;Acc:Q5U4C3]
12325	ENSMUST00000223712	4.5085	0.0495568	UP	ENSMUSG00000021820	Q8BW40	Camk2g	calcium/calmodulin-dependent protein kinase II gamma
71890	ENSMUST00000105707	4.5253	0.0120636	UP	ENSMUSG00000029003	Q9D752	Mad2l2	Mitotic spindle assembly checkpoint protein MAD2B [Source:UniProtKB/Swiss-Prot;Acc:Q9D752]
226499	ENSMUST00000148389	4.53781	0.0160319	UP	ENSMUSG00000006010	Q4PJX1	BC003331	odr-4 GPCR localization factor homolog [Source:HGNC Symbol;Acc:HGNC:24299]
68480	ENSMUST00000221443	4.5473	0.0299983	UP	ENSMUSG00000037960	Q9D1I2	Card19	caspase recruitment domain family, member 19
18537	ENSMUST00000161428	4.56269	0.0221223	UP	ENSMUSG00000019795	E9PWE0	Pcmt1	protein-L-isoaspartate (D-aspartate) O-methyltransferase 1 [Source:MGI Symbol;Acc:MGI:97502]
108907	ENSMUST00000068225	4.56905	0.0328748	UP	ENSMUSG00000027306	Q9ERH4	Nusap1	Nucleolar and spindle-associated protein 1 [Source:UniProtKB/Swiss-Prot;Acc:Q9ERH4]
67713	ENSMUST00000117223	4.57472	0.0298374	UP	ENSMUSG00000027679	Q9CQV7	Dnajc19	Mitochondrial import inner membrane translocase subunit TIM14 [Source:UniProtKB/Swiss-Prot;Acc:Q9CQV7]
241308	ENSMUST00000138704	4.6001	0.0131596	UP	ENSMUSG00000038831	A2AR50	Ralgps1	Ras-specific guanine nucleotide-releasing factor RalGPS1 [Source:UniProtKB/Swiss-Prot;Acc:A2AR50]
76799	ENSMUST00000174350	4.60792	0.0227843	UP	ENSMUSG00000028797	Q8R1E7	Tmem234	transmembrane protein 234 [Source:MGI Symbol;Acc:MGI:1924049]
71116	ENSMUST00000031008	4.61684	0.0312447	UP	ENSMUSG00000029125	Q8VDS8	Stx18	Syntaxin-18 [Source:UniProtKB/Swiss-Prot;Acc:Q8VDS8]
18189	ENSMUST00000177342	4.62062	0.0349452	UP	ENSMUSG00000024109	Q9CS84	Nrxn1	Neurexin-1 [Source:UniProtKB/Swiss-Prot;Acc:Q9CS84]
16186	ENSMUST00000135038	4.62072	0.0182185	UP	ENSMUSG00000031304	P34902	Il2rg	Cytokine receptor common subunit gamma [Source:UniProtKB/Swiss-Prot;Acc:P34902]
11733	ENSMUST00000117296	4.62465	0.0337506	UP	ENSMUSG00000031543	Q02357	Ank1	Ankyrin-1 [Source:UniProtKB/Swiss-Prot;Acc:Q02357]
66105	ENSMUST00000196878	4.63882	0.015971	UP	ENSMUSG00000078578	Q4QQL2	Ube2d3	ubiquitin-conjugating enzyme E2D 3 [Source:MGI Symbol;Acc:MGI:1913355]
329154	ENSMUST00000178226	4.64002	0.0337903	UP	ENSMUSG00000052331	B2RXR6	Ankrd44	Serine/threonine-protein phosphatase 6 regulatory ankyrin repeat subunit B [Source:UniProtKB/Swiss-Prot;Acc:B2RXR6]
67268	ENSMUST00000129093	4.64453	0.00231426	UP	ENSMUSG00000024048	Q6ZWQ9	Myl12a	myosin, light chain 12A, regulatory, non-sarcomeric
629756	ENSMUST00000094344	4.68071	0.00300787	UP	ENSMUSG00000070529	Q3V2J9	Wfdc10	WAP four-disulfide core domain 10 [Source:MGI Symbol;Acc:MGI:3616889]
20014	ENSMUST00000126248	4.68323	0.0486637	UP	ENSMUSG00000027642	Q9DBG6	Rpn2	Mus musculus ribophorin II (Rpn2), transcript variant 4, mRNA. [Source:RefSeq mRNA;Acc:NM_001355165]
100503659	ENSMUST00000147778	4.70582	0.0308988	UP	ENSMUSG00000035640	Q66L44	Cbarp	Voltage-dependent calcium channel beta subunit-associated regulatory protein [Source:UniProtKB/Swiss-Prot;Acc:Q66L44]
56708	ENSMUST00000132305	4.71762	0.0338878	UP	ENSMUSG00000040663	Q9QZM3	Clcf1	Cardiotrophin-like cytokine factor 1 [Source:UniProtKB/Swiss-Prot;Acc:Q9QZM3]
11870	ENSMUST00000033300	4.72091	0.0397387	UP	ENSMUSG00000030996	Q60935	Art1	ADP-ribosyltransferase 1 [Source:MGI Symbol;Acc:MGI:107511]
19261	ENSMUST00000127751	4.72618	0.000432576	UP	ENSMUSG00000037902	P97797	Sirpa	signal-regulatory protein alpha [Source:MGI Symbol;Acc:MGI:108563]
74246	ENSMUST00000102540	4.79072	0.0208173	UP	ENSMUSG00000028671	Q8R059	Gale	Mus musculus galactose-4-epimerase, UDP (Gale), mRNA. [Source:RefSeq mRNA;Acc:NM_001356493]
18146	ENSMUST00000144413	4.79167	0.0480155	UP	ENSMUSG00000015094	Q64322	Npdc1	Neural proliferation differentiation and control protein 1 [Source:UniProtKB/Swiss-Prot;Acc:Q64322]
55927	ENSMUST00000086851	4.79764	0.0337493	UP	ENSMUSG00000067071	Q9JHE6	Hes6	Transcription cofactor HES-6 [Source:UniProtKB/Swiss-Prot;Acc:Q9JHE6]
100041621,100041574	ENSMUST00000040594	4.80571	0.0289173	UP	ENSMUSG00000036552	F6UWZ4,Q8C5D3	Ermard	predicted gene 3435
68616	ENSMUST00000207004	4.82574	0.0321411	UP	ENSMUSG00000030703	Q99LY2	Gdpd3	Lysophospholipase D GDPD3 [Source:UniProtKB/Swiss-Prot;Acc:Q99LY2]
208643	ENSMUST00000115461	4.8378	0.048343	UP	ENSMUSG00000045983	Q6NZJ6	Eif4g1	Eukaryotic translation initiation factor 4 gamma 1 [Source:UniProtKB/Swiss-Prot;Acc:Q6NZJ6]
70592	ENSMUST00000030968	4.86058	0.0400537	UP	ENSMUSG00000029089	A0A0G2JE33,A0A0G2JE98	5730480H06Rik	RIKEN cDNA 5730480H06 gene
71721	ENSMUST00000220442	4.86552	0.00732606	UP	ENSMUSG00000043259	Q9DBR2	Fam13c	Protein FAM13C [Source:UniProtKB/Swiss-Prot;Acc:Q9DBR2]
230648	ENSMUST00000074425	4.86901	0.0343437	UP	ENSMUSG00000034210	Q6PCQ6	Efcab14	EF-hand calcium-binding domain-containing protein 14 [Source:UniProtKB/Swiss-Prot;Acc:Q8BGQ6]
234839	ENSMUST00000156333	4.86981	0.000377404	UP	ENSMUSG00000014444	E9PUQ9	Piezo1	Mus musculus piezo-type mechanosensitive ion channel component 1 (Piezo1), transcript variant 1, mRNA. [Source:RefSeq mRNA;Acc:NM_001357349]
98256	ENSMUST00000142223	4.89223	0.0473266	UP	ENSMUSG00000039783	Q91WN4	Kmo	Kynurenine 3-monooxygenase [Source:UniProtKB/Swiss-Prot;Acc:Q91WN4]
22418	ENSMUST00000112272	4.89978	0.0246827	UP	ENSMUSG00000021994	P22725	Wnt5a	wingless-type MMTV integration site family, member 5A [Source:MGI Symbol;Acc:MGI:98958]
246277	ENSMUST00000230288	4.92281	0.0323576	UP	ENSMUSG00000023044	Q9DBE0	Csad	cysteine sulfinic acid decarboxylase
56490	ENSMUST00000141941	4.93415	0.00766145	UP	ENSMUSG00000022708	Q8K0L9	Zbtb20	zinc finger and BTB domain containing 20 [Source:MGI Symbol;Acc:MGI:1929213]
21453	ENSMUST00000163446	4.93606	0.00676669	UP	ENSMUSG00000024613	O08784	Tcof1	Treacle protein [Source:UniProtKB/Swiss-Prot;Acc:O08784]
234663	ENSMUST00000212230	4.96833	0.0246058	UP	ENSMUSG00000035770	Q6PDL0	Dync1li2	Cytoplasmic dynein 1 light intermediate chain 2 [Source:UniProtKB/Swiss-Prot;Acc:Q6PDL0]
14130	ENSMUST00000081103	4.97155	0.0417124	UP	ENSMUSG00000026656	A0A0B4J1G1	Fcgr2b	Fc receptor, IgG, low affinity IIb
28169	ENSMUST00000001240	4.97339	0.0270795	UP	ENSMUSG00000001211	Q9D517	Agpat3	1-acyl-sn-glycerol-3-phosphate acyltransferase gamma [Source:UniProtKB/Swiss-Prot;Acc:Q9D517]
28135	ENSMUST00000162960	4.97379	0.0406393	UP	ENSMUSG00000032534	U5KVR9	Cep63	Centrosomal protein of 63 kDa [Source:UniProtKB/Swiss-Prot;Acc:Q3UPP8]
29813	ENSMUST00000229551	4.97501	0.0128839	UP	ENSMUSG00000000552	Q8VD12	Zfp385a	zinc finger protein 385A
65963	ENSMUST00000203501	4.97626	0.00325224	UP	ENSMUSG00000029810	Q9R1Q6	Tmem176b	Transmembrane protein 176B [Source:UniProtKB/Swiss-Prot;Acc:Q9R1Q6]
69930	ENSMUST00000107986	4.97705	0.0456773	UP	ENSMUSG00000012640	Q6PG13	Zfp715	zinc finger protein 715 [Source:MGI Symbol;Acc:MGI:1917180]
235493	ENSMUST00000214755	5.0422	0.0419865	UP	ENSMUSG00000034858	Q69ZK7	Fam214a	Protein FAM214A [Source:UniProtKB/Swiss-Prot;Acc:Q69ZK7]
15018	ENSMUST00000173788	5.05516	0.0479855	UP	ENSMUSG00000060550	P14429	H2-Q7	Mus musculus histocompatibility 2, Q region locus 9 (H2-Q9), mRNA. [Source:RefSeq mRNA;Acc:NM_001201460]
67621	ENSMUST00000030274	5.09103	0.0105032	UP	ENSMUSG00000028545	Q8C6D4	Bend5	BEN domain-containing protein 5 [Source:UniProtKB/Swiss-Prot;Acc:Q8C6D4]
28254	ENSMUST00000173877	5.09731	0.000655229	UP	ENSMUSG00000079262	Q99J94	Slco1a6	Solute carrier organic anion transporter family member 1A6 [Source:UniProtKB/Swiss-Prot;Acc:Q99J94]
27214	ENSMUST00000002368	5.11185	0.0103927	UP	ENSMUSG00000002297	Q9QZ41	Dbf4	A [Source:UniProtKB/Swiss-Prot;Acc:Q9QZ41]
74776	ENSMUST00000122334	5.11781	0.011389	UP	ENSMUSG00000028013	Q91VM9	Ppa2	pyrophosphatase (inorganic) 2 [Source:MGI Symbol;Acc:MGI:1922026]
20353	ENSMUST00000191642	5.13662	0.0349899	UP	ENSMUSG00000026121	Q64151	Sema4c	Semaphorin-4C [Source:UniProtKB/Swiss-Prot;Acc:Q64151]
66441	ENSMUST00000173837	5.13964	0.0069205	UP	ENSMUSG00000030188	A0A023T778	Magohb	mago homolog B, exon junction complex core component
18577	ENSMUST00000115458	5.14271	0.0345809	UP	ENSMUSG00000032177	Q3TUD0	Pde4a	phosphodiesterase 4A, cAMP specific [Source:MGI Symbol;Acc:MGI:99558]
101543	ENSMUST00000205914	5.15214	0.00359455	UP	ENSMUSG00000036459	Q7TQJ8	Wtip	WT1-interacting protein [Source:MGI Symbol;Acc:MGI:2141920]
74694	ENSMUST00000064107	5.15249	0.00980091	UP	ENSMUSG00000052302	Q69ZT9	Tbc1d30	TBC1 domain family, member 30
[truncated: 257 more rows]

## Sheet: BPD VS MNC
entrez	ID	logFC	Pvalue	adj.Pvalue	regulation	ensembl	symbol	description
237082	ENSMUST00000112916	9.87795	4.41522e-05	0.0219015	up	ENSMUSG00000042271	Nxt2	NTF2-related export protein 2 [Source:UniProtKB/Swiss-Prot;Acc:Q3UNA4]
17937	ENSMUST00000099157	9.85783	3.91625e-07	0.00268112	up	ENSMUSG00000025402	Nab2	NGFI-A-binding protein 2 [Source:UniProtKB/Swiss-Prot;Acc:Q61127]
12802	ENSMUST00000068830	9.74768	5.45987e-06	0.0071261	up	ENSMUSG00000062585	Cnr2	Cannabinoid receptor 2 [Source:UniProtKB/Swiss-Prot;Acc:P47936]
218215	ENSMUST00000068891	9.70291	0.000150479	0.0502105	up	ENSMUSG00000038068	Rnf144b	ring finger protein 144B
71640	ENSMUST00000161458	9.67275	2.6285e-07	0.00268112	up	ENSMUSG00000032425	Zfp949	zinc finger protein 949 [Source:MGI Symbol;Acc:MGI:1918890]
237886	ENSMUST00000092840	9.55175	8.09551e-06	0.00874577	up	ENSMUSG00000069793	Slfn9	schlafen 9
83395	ENSMUST00000047997	9.47568	8.32392e-06	0.00876608	up	ENSMUSG00000038560	Sp6	trans-acting transcription factor 6 [Source:MGI Symbol;Acc:MGI:1932575]
12265	ENSMUST00000023147	9.43634	0.000366147	0.0805561	up	ENSMUSG00000022504	Ciita	class II transactivator
243272	ENSMUST00000065263	9.38579	0.0102303	0.396314	up	ENSMUSG00000038095	Sbno1	strawberry notch 1 [Source:MGI Symbol;Acc:MGI:2384298]
30877	ENSMUST00000037739	9.27298	5.34559e-05	0.0251993	up	ENSMUSG00000042354	Gnl3	guanine nucleotide binding protein-like 3 (nucleolar)
13845	ENSMUST00000159575	9.26071	6.11314e-06	0.00747052	up	ENSMUSG00000005958	Ephb3	Ephrin type-B receptor 3 [Source:UniProtKB/Swiss-Prot;Acc:P54754]
12675	ENSMUST00000119591	9.06579	3.24135e-05	0.0190616	up	ENSMUSG00000025199	Chuk	conserved helix-loop-helix ubiquitous kinase [Source:HGNC Symbol;Acc:HGNC:1974]
108101	ENSMUST00000040772	9.04511	0.000378233	0.0818088	up	ENSMUSG00000024965	Fermt3	fermitin family member 3
240354	ENSMUST00000225085	8.982	0.000107628	0.0407291	up	ENSMUSG00000032688	Malt1	Mucosa-associated lymphoid tissue lymphoma translocation [Source:UniProtKB/Swiss-Prot;Acc:Q2TBA3]
235431	ENSMUST00000048043	8.94752	0.013302	0.435593	up	ENSMUSG00000041729	Coro2b	Coronin-2B [Source:UniProtKB/Swiss-Prot;Acc:Q8BH44]
83395	ENSMUST00000107622	8.92848	5.16935e-06	0.00683997	up	ENSMUSG00000038560	Sp6	trans-acting transcription factor 6 [Source:MGI Symbol;Acc:MGI:1932575]
22034	ENSMUST00000004949	8.88918	0.000829896	0.124951	up	ENSMUSG00000027164	Traf6	TNF receptor-associated factor 6 [Source:UniProtKB/Swiss-Prot;Acc:P70196]
216874	ENSMUST00000145823	8.88415	0.00077453	0.123004	up	ENSMUSG00000040712	Camta2	Calmodulin-binding transcription activator 2 [Source:UniProtKB/Swiss-Prot;Acc:Q80Y50]
71085	ENSMUST00000177495	8.83981	1.1057e-06	0.00353136	up	ENSMUSG00000025154	Arhgap19	Rho GTPase-activating protein 19 [Source:UniProtKB/Swiss-Prot;Acc:Q8BRH3]
244757	ENSMUST00000040398	8.81252	0.0103441	0.397882	up	ENSMUSG00000036395	Glb1l2	galactosidase beta 1 like 2 [Source:HGNC Symbol;Acc:HGNC:25129]
434197	ENSMUST00000210558	8.77174	1.26969e-06	0.00373578	up	ENSMUSG00000074071	Fam169b	Protein FAM169B [Source:UniProtKB/Swiss-Prot;Acc:Q8CHT6]
20533	ENSMUST00000006749	8.74048	0.0171402	0.469722	up	ENSMUSG00000006574	Slc4a1	solute carrier family 4 (anion exchanger), member 1 [Source:MGI Symbol;Acc:MGI:109393]
109135	ENSMUST00000204145	8.72373	2.80947e-06	0.00502624	up	ENSMUSG00000030231	Plekha5	pleckstrin homology domain containing A5 [Source:HGNC Symbol;Acc:HGNC:30036]
11433	ENSMUST00000213815	8.68512	3.10557e-05	0.0186199	up	ENSMUSG00000001348	Acp5	Tartrate-resistant acid phosphatase type 5 [Source:UniProtKB/Swiss-Prot;Acc:Q05117]
11492	ENSMUST00000011400	8.67495	0.0166428	0.465528	up	ENSMUSG00000011256	Adam19	Disintegrin and metalloproteinase domain-containing protein 19 [Source:UniProtKB/Swiss-Prot;Acc:O35674]
99696	ENSMUST00000156038	8.66402	0.0258059	0.53578	up	ENSMUSG00000044864	Ankrd50	ankyrin repeat domain 50 [Source:MGI Symbol;Acc:MGI:2139777]
192285	ENSMUST00000090586	8.64825	0.00751262	0.350359	up	ENSMUSG00000058318	Phf21a	PHD finger protein 21A isoform 4 [Source:RefSeq peptide;Acc:NP_001333633]
20787	ENSMUST00000134660	8.54513	0.0168451	0.467688	up	ENSMUSG00000020538	Srebf1	Mus musculus sterol regulatory element binding transcription factor 1 (Srebf1), transcript variant 4, mRNA. [Source:RefSeq mRNA;Acc:NM_001358315]
244958	ENSMUST00000113149	8.54306	8.62107e-07	0.00324323	up	ENSMUSG00000042761	Mrap2	Melanocortin-2 receptor accessory protein 2 [Source:UniProtKB/Swiss-Prot;Acc:D3Z1Q2]
15560	ENSMUST00000036303	8.53436	1.00248e-06	0.00345352	up	ENSMUSG00000041380	Htr2c	5-hydroxytryptamine (serotonin) receptor 2C [Source:MGI Symbol;Acc:MGI:96281]
16882	ENSMUST00000092849	8.48352	0.00132132	0.156204	up	ENSMUSG00000020697	Lig3	ligase III, DNA, ATP-dependent [Source:MGI Symbol;Acc:MGI:109152]
94094	ENSMUST00000106849	8.46954	0.00268682	0.214701	up	ENSMUSG00000056144	Trim34a	tripartite motif-containing 34A [Source:MGI Symbol;Acc:MGI:2137359]
328563	ENSMUST00000181467	8.46532	1.49515e-06	0.00376175	up	ENSMUSG00000091694	Apol11b	apolipoprotein L 11b [Source:MGI Symbol;Acc:MGI:3036248]
110611	ENSMUST00000170883	8.42592	0.00796	0.359398	up	ENSMUSG00000034088	Hdlbp	Mus musculus high density lipoprotein (HDL) binding protein (Hdlbp), transcript variant 3, mRNA. [Source:RefSeq mRNA;Acc:NM_001357556]
19262	ENSMUST00000028769	8.39505	0.0117493	0.419703	up	ENSMUSG00000027303	Ptpra	protein tyrosine phosphatase, receptor type, A [Source:MGI Symbol;Acc:MGI:97808]
19016	ENSMUST00000203732	8.36232	4.7729e-06	0.00672885	up	ENSMUSG00000000440	Pparg	peroxisome proliferator activated receptor gamma [Source:MGI Symbol;Acc:MGI:97747]
27049	ENSMUST00000119109	8.28086	0.00200914	0.186942	up	ENSMUSG00000003382	Etv3	ETS translocation variant 3 [Source:UniProtKB/Swiss-Prot;Acc:Q8R4Z4]
104732	ENSMUST00000049271	8.24019	3.6833e-05	0.0201909	up	ENSMUSG00000037466	Tedc1	tubulin epsilon and delta complex 1 [Source:MGI Symbol;Acc:MGI:2144738]
12695	ENSMUST00000041284	8.22481	0.0229692	0.518275	up	ENSMUSG00000061859	Patj	Mus musculus PATJ, crumbs cell polarity complex component (Patj), transcript variant 5, mRNA. [Source:RefSeq mRNA;Acc:NM_001355177]
268515	ENSMUST00000044985	8.15112	0.00739037	0.349303	up	ENSMUSG00000039741	Bahcc1	Mus musculus BAH domain and coiled-coil containing 1 (Bahcc1), transcript variant 2, mRNA. [Source:RefSeq mRNA;Acc:NM_001347621]
71746	ENSMUST00000214713	8.0855	5.0661e-06	0.00683997	up	ENSMUSG00000040146	Rgl3	Ral guanine nucleotide dissociation stimulator-like 3 [Source:UniProtKB/Swiss-Prot;Acc:Q3UYI5]
15122	ENSMUST00000093209	8.0644	0.0028059	0.219929	up	ENSMUSG00000069919	Hba-a1	hemoglobin alpha, adult chain 1 [Source:MGI Symbol;Acc:MGI:96015]
12297	ENSMUST00000230490	8.00111	0.0300683	0.55955	up	ENSMUSG00000003352	Cacnb3	calcium channel, voltage-dependent, beta 3 subunit
14731	ENSMUST00000164972	7.98875	0.0100439	0.393353	up	ENSMUSG00000022561	Gpaa1	GPI anchor attachment protein 1 [Source:MGI Symbol;Acc:MGI:1202392]
68675	ENSMUST00000099358	7.9867	2.08696e-05	0.0149405	up	ENSMUSG00000064138	Fam172a	family with sequence similarity 172, member A
105855	ENSMUST00000047405	7.96288	0.0130157	0.432023	up	ENSMUSG00000022488	Nckap1l	NCK associated protein 1 like
102423	ENSMUST00000216508	7.92319	0.00200718	0.186942	up	ENSMUSG00000032119	Hinfp	Histone H4 transcription factor [Source:UniProtKB/Swiss-Prot;Acc:Q8K1K9]
67241	ENSMUST00000218022	7.89739	0.0250735	0.530771	up	ENSMUSG00000020608	Smc6	structural maintenance of chromosomes 6
72416	ENSMUST00000112308	7.897	0.0158577	0.458364	up	ENSMUSG00000024120	Lrpprc	Leucine-rich PPR motif-containing protein, mitochondrial [Source:UniProtKB/Swiss-Prot;Acc:Q6PB66]
22359	ENSMUST00000047645	7.88558	0.0184275	0.482797	up	ENSMUSG00000024924	Vldlr	very low density lipoprotein receptor [Source:MGI Symbol;Acc:MGI:98935]
20661	ENSMUST00000135636	7.8413	0.00136951	0.159764	up	ENSMUSG00000068747	Sort1	Sortilin [Source:UniProtKB/Swiss-Prot;Acc:Q6PHU5]
14615	ENSMUST00000107075	7.7943	0.0168831	0.467688	up	ENSMUSG00000034520	Gjc1	gap junction protein, gamma 1 [Source:MGI Symbol;Acc:MGI:95718]
15388	ENSMUST00000038572	7.78119	0.000255408	0.0660416	up	ENSMUSG00000015165	Hnrnpl	Heteroous nuclear ribonucleoprotein L [Source:UniProtKB/Swiss-Prot;Acc:Q8R081]
18854	ENSMUST00000126690	7.7593	0.0100959	0.394098	up	ENSMUSG00000036986	Pml	Protein PML [Source:UniProtKB/Swiss-Prot;Acc:Q60953]
19356	ENSMUST00000022136	7.75609	0.00331923	0.238871	up	ENSMUSG00000021635	Rad17	RAD17 checkpoint clamp loader component
77976	ENSMUST00000020220	7.74366	0.0184541	0.483164	up	ENSMUSG00000020032	Nuak1	NUAK family SNF1-like kinase 1 [Source:UniProtKB/Swiss-Prot;Acc:Q641K5]
50793	ENSMUST00000108142	7.739	0.0146965	0.448461	up	ENSMUSG00000040044	Orc3	Origin recognition complex subunit 3 [Source:UniProtKB/Swiss-Prot;Acc:Q9JK30]
103724	ENSMUST00000180088	7.68973	0.00939031	0.38114	up	ENSMUSG00000034412	Tbc1d10a	TBC1 domain family member 10A [Source:UniProtKB/Swiss-Prot;Acc:P58802]
18019	ENSMUST00000074618	7.67309	0.00457232	0.27964	up	ENSMUSG00000027544	Nfatc2	nuclear factor of activated T cells, cytoplasmic, calcineurin dependent 2 [Source:MGI Symbol;Acc:MGI:102463]
212974	ENSMUST00000164580	7.67243	0.00252851	0.208713	up	ENSMUSG00000062031	Pgghg	Protein-glucosylgalactosylhydroxylysine glucosidase [Source:UniProtKB/Swiss-Prot;Acc:Q8BP56]
140481	ENSMUST00000205535	7.65484	0.0171889	0.47038	up	ENSMUSG00000038886	Man2a2	Alpha-mannosidase 2x [Source:UniProtKB/Swiss-Prot;Acc:Q8BRK9]
108058	ENSMUST00000066466	7.62148	0.0295613	0.556755	up	ENSMUSG00000053819	Camk2d	Mus musculus calcium/calmodulin-dependent protein kinase II, delta (Camk2d), transcript variant 8, mRNA. [Source:RefSeq mRNA;Acc:NM_001346635]
13831	ENSMUST00000028100	7.55464	0.00722671	0.346545	up	ENSMUSG00000024240	Epc1	Enhancer of polycomb homolog 1 [Source:UniProtKB/Swiss-Prot;Acc:Q8C9X6]
237073	ENSMUST00000033810	7.55294	0.0100699	0.393646	up	ENSMUSG00000031433	Rbm41	RNA-binding protein 41 [Source:UniProtKB/Swiss-Prot;Acc:Q8JZV4]
57810	ENSMUST00000042842	7.54871	0.0194618	0.490213	up	ENSMUSG00000038119	Cdon	Cell adhesion molecule-related/down-regulated by oncos [Source:UniProtKB/Swiss-Prot;Acc:Q32MD9]
68743	ENSMUST00000040912	7.54154	0.0117199	0.419301	up	ENSMUSG00000036777	Anln	Anillin [Source:UniProtKB/Swiss-Prot;Acc:Q8K298]
15018	ENSMUST00000173788	7.53264	0.00605032	0.317074	up	ENSMUSG00000060550	H2-Q7	Mus musculus histocompatibility 2, Q region locus 9 (H2-Q9), mRNA. [Source:RefSeq mRNA;Acc:NM_001201460]
24099	ENSMUST00000208683	7.50421	0.00417463	0.269142	up	ENSMUSG00000031497	Tnfsf13b	tumor necrosis factor (ligand) superfamily, member 13b [Source:MGI Symbol;Acc:MGI:1344376]
15273	ENSMUST00000015645	7.47855	0.0247378	0.529126	up	ENSMUSG00000015501	Hivep2	Mus musculus human immunodeficiency virus type I enhancer binding protein 2 (Hivep2), transcript variant 2, mRNA. [Source:RefSeq mRNA;Acc:NM_001358782]
73340	ENSMUST00000175858	7.4696	0.0160557	0.459748	up	ENSMUSG00000022421	Nptxr	neuronal pentraxin receptor [Source:MGI Symbol;Acc:MGI:1920590]
13838	ENSMUST00000027451	7.45509	0.0139473	0.439616	up	ENSMUSG00000026235	Epha4	Ephrin type-A receptor 4 [Source:UniProtKB/Swiss-Prot;Acc:Q03137]
76464	ENSMUST00000028799	7.44251	0.00501705	0.291661	up	ENSMUSG00000027326	Knl1	Kinetochore scaffold 1 [Source:UniProtKB/Swiss-Prot;Acc:Q66JQ7]
108912	ENSMUST00000124045	7.3982	0.000235011	0.0645057	up	ENSMUSG00000048922	Cdca2	Cell division cycle-associated protein 2 [Source:UniProtKB/Swiss-Prot;Acc:Q14B71]
22031	ENSMUST00000021706	7.38142	0.0191768	0.487708	up	ENSMUSG00000021277	Traf3	TNF receptor-associated factor 3 [Source:MGI Symbol;Acc:MGI:108041]
16978	ENSMUST00000189505	7.35958	2.18182e-06	0.00436049	up	ENSMUSG00000026305	Lrrfip1	leucine rich repeat (in FLII) interacting protein 1 [Source:MGI Symbol;Acc:MGI:1342770]
13047	ENSMUST00000004097	7.34767	0.0234747	0.521327	up	ENSMUSG00000029705	Cux1	cut-like homeobox 1 [Source:MGI Symbol;Acc:MGI:88568]
18189	ENSMUST00000174331	7.33316	0.000354683	0.0794048	up	ENSMUSG00000024109	Nrxn1	Neurexin-1 [Source:UniProtKB/Swiss-Prot;Acc:Q9CS84]
72155	ENSMUST00000212184	7.33277	0.000257682	0.0662723	up	ENSMUSG00000031756	Cenpn	Centromere protein N [Source:UniProtKB/Swiss-Prot;Acc:Q9CZW2]
226407	ENSMUST00000142662	7.30867	0.00039581	0.083465	up	ENSMUSG00000036104	Rab3gap1	Rab3 GTPase-activating protein catalytic subunit [Source:UniProtKB/Swiss-Prot;Acc:Q80UJ7]
319565	ENSMUST00000157033	7.30636	0.0211835	0.503863	up	ENSMUSG00000063450	Syne2	spectrin repeat containing, nuclear envelope 2 [Source:MGI Symbol;Acc:MGI:2449316]
217304	ENSMUST00000149663	7.29627	0.0452794	0.604758	up	ENSMUSG00000063193	Cd300lb	Mus musculus CD300 molecule like family member B (Cd300lb), transcript variant 2, mRNA. [Source:RefSeq mRNA;Acc:NM_001347651]
215653	ENSMUST00000028814	7.29604	0.0200106	0.493921	up	ENSMUSG00000027339	Rassf2	Ras association domain-containing protein 2 [Source:UniProtKB/Swiss-Prot;Acc:Q8BMS9]
71723	ENSMUST00000094816	7.28145	0.0080805	0.361288	up	ENSMUSG00000006019	Dhx34	DExH-box helicase 34 [Source:HGNC Symbol;Acc:HGNC:16719]
15273	ENSMUST00000191138	7.27658	0.020158	0.494973	up	ENSMUSG00000015501	Hivep2	Mus musculus human immunodeficiency virus type I enhancer binding protein 2 (Hivep2), transcript variant 2, mRNA. [Source:RefSeq mRNA;Acc:NM_001358782]
14017	ENSMUST00000103236	7.2495	0.000802423	0.123581	up	ENSMUSG00000078771	Evi2a	Protein EVI2A [Source:UniProtKB/Swiss-Prot;Acc:P20934]
243308	ENSMUST00000069862	7.22618	0.0167343	0.466586	up	ENSMUSG00000056014	A430033K04Rik	RIKEN cDNA A430033K04 gene [Source:MGI Symbol;Acc:MGI:3583896]
234258	ENSMUST00000047768	7.20999	0.00145036	0.165045	up	ENSMUSG00000039396	Neil3	Endonuclease 8-like 3 [Source:UniProtKB/Swiss-Prot;Acc:Q8K203]
18751	ENSMUST00000064989	7.19238	0.0123187	0.424702	up	ENSMUSG00000052889	Prkcb	protein kinase C, beta [Source:MGI Symbol;Acc:MGI:97596]
214133	ENSMUST00000199381	7.19161	0.0300883	0.559707	up	ENSMUSG00000040943	Tet2	Mus musculus tet methylcytosine dioxygenase 2 (Tet2), transcript variant 2, mRNA. [Source:RefSeq mRNA;Acc:NM_001346736]
52858	ENSMUST00000206346	7.19106	0.00325312	0.236159	up	ENSMUSG00000030682	Cdipt	CDP-diacylglycerol--inositol 3-phosphatidyltransferase [Source:UniProtKB/Swiss-Prot;Acc:Q8VDP6]
110816	ENSMUST00000042556	7.1581	0.0126106	0.427848	up	ENSMUSG00000032834	Pwp2	PWP2 periodic tryptophan protein homolog (yeast)
17260	ENSMUST00000197146	7.15721	0.00485246	0.288235	up	ENSMUSG00000005583	Mef2c	Mus musculus myocyte enhancer factor 2C (Mef2c), transcript variant 14, mRNA. [Source:RefSeq mRNA;Acc:NM_001347577]
434218	ENSMUST00000180136	7.1341	2.8817e-06	0.00502624	up	ENSMUSG00000090215	Trim34b	tripartite motif-containing 34B
108912	ENSMUST00000131179	7.09505	3.51585e-05	0.0196092	up	ENSMUSG00000048922	Cdca2	Cell division cycle-associated protein 2 [Source:UniProtKB/Swiss-Prot;Acc:Q14B71]
319817	ENSMUST00000112936	7.08397	0.0203456	0.496499	up	ENSMUSG00000075376	Rc3h2	Roquin-2 [Source:UniProtKB/Swiss-Prot;Acc:P0C090]
26939	ENSMUST00000033173	7.07952	0.0154042	0.455344	up	ENSMUSG00000030880	Polr3e	DNA-directed RNA polymerase III subunit RPC5 [Source:UniProtKB/Swiss-Prot;Acc:Q9CZT4]
14107	ENSMUST00000191428	7.0472	0.0181316	0.479628	up	ENSMUSG00000070047	Fat1	FAT atypical cadherin 1 [Source:HGNC Symbol;Acc:HGNC:3595]
26885	ENSMUST00000029950	7.0229	0.0260493	0.537194	up	ENSMUSG00000028282	Casp8ap2	CASP8-associated protein 2 [Source:UniProtKB/Swiss-Prot;Acc:Q9WUF3]
102920	ENSMUST00000101251	7.01912	0.010922	0.408401	up	ENSMUSG00000031262	Cenpi	Centromere protein I [Source:UniProtKB/Swiss-Prot;Acc:Q8K1K4]
104027	ENSMUST00000143275	7.00364	0.0206794	0.499177	up	ENSMUSG00000043079	Synpo	Synaptopodin [Source:UniProtKB/Swiss-Prot;Acc:Q8CC35]
101739	ENSMUST00000107215	6.98497	0.0101223	0.39449	up	ENSMUSG00000028484	Psip1	Mus musculus PC4 and SFRS1 interacting protein 1 (Psip1), transcript variant 3, mRNA. [Source:RefSeq mRNA;Acc:NM_001347143]
114716	ENSMUST00000093299	6.98277	0.027789	0.545863	up	ENSMUSG00000045671	Spred2	Sprouty-related, EVH1 domain-containing protein 2 [Source:UniProtKB/Swiss-Prot;Acc:Q924S7]
71721	ENSMUST00000220159	6.96618	0.00152487	0.169433	up	ENSMUSG00000043259	Fam13c	Protein FAM13C [Source:UniProtKB/Swiss-Prot;Acc:Q9DBR2]
22402	ENSMUST00000147079	6.92065	4.47857e-05	0.0220187	up	ENSMUSG00000005124	Wisp1	WNT1 inducible signaling pathway protein 1 [Source:MGI Symbol;Acc:MGI:1197008]
237436	ENSMUST00000220234	6.91155	0.000127738	0.0454692	up	ENSMUSG00000074802	Gas2l3	growth arrest-specific 2 like 3
27401	ENSMUST00000191316	6.91077	3.71903e-06	0.00589701	up	ENSMUSG00000054115	Skp2	S-phase kinase-associated protein 2 (p45) [Source:MGI Symbol;Acc:MGI:1351663]
56795	ENSMUST00000026988	6.90794	0.0136742	0.438881	up	ENSMUSG00000025870	Arl10	ADP-ribosylation factor-like protein 10 [Source:UniProtKB/Swiss-Prot;Acc:Q9QXJ4]
54132	ENSMUST00000182540	6.90599	0.0244383	0.52825	up	ENSMUSG00000055044	Pdlim1	PDZ and LIM domain protein 1 [Source:UniProtKB/Swiss-Prot;Acc:O70400]
12428	ENSMUST00000156575	6.90318	5.55634e-06	0.00720301	up	ENSMUSG00000027715	Ccna2	Cyclin-A2 [Source:UniProtKB/Swiss-Prot;Acc:P51943]
69125	ENSMUST00000108843	6.88582	0.0499791	0.604758	up	ENSMUSG00000020515	Cnot8	Mus musculus CCR4-NOT transcription complex, subunit 8 (Cnot8), transcript variant 2, mRNA. [Source:RefSeq mRNA;Acc:NM_001356477]
171567	ENSMUST00000193808	6.87369	0.00051889	0.0973166	up	ENSMUSG00000026575	Nme7	NME/NM23 family member 7 [Source:HGNC Symbol;Acc:HGNC:20461]
226594	ENSMUST00000040357	6.84775	0.0320873	0.569076	up	ENSMUSG00000040723	Rcsd1	RCSD domain containing 1 [Source:MGI Symbol;Acc:MGI:2676394]
319817	ENSMUST00000112934	6.84609	0.0240755	0.525142	up	ENSMUSG00000075376	Rc3h2	Roquin-2 [Source:UniProtKB/Swiss-Prot;Acc:P0C090]
76380	ENSMUST00000150863	6.84279	0.0152431	0.453451	up	ENSMUSG00000020728	Cep112	Centrosomal protein of 112 kDa [Source:UniProtKB/Swiss-Prot;Acc:Q5PR68]
320664	ENSMUST00000103073	6.83766	0.0229298	0.518275	up	ENSMUSG00000074570	Cass4	Cas scaffolding protein family member 4 [Source:UniProtKB/Swiss-Prot;Acc:Q08EC4]
217333	ENSMUST00000141531	6.83589	0.0157104	0.457674	up	ENSMUSG00000020773	Trim47	tripartite motif-containing 47 [Source:MGI Symbol;Acc:MGI:1917374]
20612	ENSMUST00000028794	6.82683	0.0209665	0.502225	up	ENSMUSG00000027322	Siglec1	sialic acid binding Ig-like lectin 1, sialoadhesin [Source:MGI Symbol;Acc:MGI:99668]
15587	ENSMUST00000010191	6.79443	0.00613558	0.319328	up	ENSMUSG00000010047	Hyal2	Hyaluronidase-2 [Source:UniProtKB/Swiss-Prot;Acc:O35632]
381820	ENSMUST00000187237	6.77663	0.0128975	0.430225	up	ENSMUSG00000072704	Smim10l1	small integral membrane protein 10-like protein 1 isoform 1 [Source:RefSeq peptide;Acc:NP_001258511]
319817	ENSMUST00000100143	6.7711	0.025018	0.530561	up	ENSMUSG00000075376	Rc3h2	Roquin-2 [Source:UniProtKB/Swiss-Prot;Acc:P0C090]
13821	ENSMUST00000103137	6.76717	0.0145095	0.44669	up	ENSMUSG00000027624	Epb41l1	band 4.1-like protein 1 isoform d [Source:RefSeq peptide;Acc:NP_001278051]
54141	ENSMUST00000146068	6.73004	0.0305022	0.561572	up	ENSMUSG00000002055	Spag5	Sperm-associated antigen 5 [Source:UniProtKB/Swiss-Prot;Acc:Q7TME2]
16453	ENSMUST00000110013	6.71327	0.0146474	0.447709	up	ENSMUSG00000031805	Jak3	Janus kinase 3 [Source:HGNC Symbol;Acc:HGNC:6193]
12581	ENSMUST00000086374	6.71184	0.0094881	0.383	up	ENSMUSG00000096472	Cdkn2d	Cyclin-dependent kinase 4 inhibitor D [Source:UniProtKB/Swiss-Prot;Acc:Q60773]
21844	ENSMUST00000089084	6.70142	0.0105049	0.400103	up	ENSMUSG00000002489	Tiam1	T cell lymphoma invasion and metastasis 1 [Source:MGI Symbol;Acc:MGI:103306]
226922	ENSMUST00000029667	6.68875	0.027319	0.543516	up	ENSMUSG00000028033	Kcnq5	Potassium voltage-gated channel subfamily KQT member 5 [Source:UniProtKB/Swiss-Prot;Acc:Q9JK45]
73447	ENSMUST00000130832	6.68527	0.016303	0.461003	up	ENSMUSG00000031166	Wdr13	WD repeat domain 13 [Source:MGI Symbol;Acc:MGI:1914661]
252837	ENSMUST00000188000	6.68332	0.00437454	0.275144	up	ENSMUSG00000079355	Ackr4	atypical chemokine receptor 4 [Source:MGI Symbol;Acc:MGI:2181676]
332397	ENSMUST00000088237	6.68323	0.0106283	0.402121	up	ENSMUSG00000072437	Nanos1	nanos C2HC-type zinc finger 1
19194	ENSMUST00000048103	6.68215	0.0010595	0.137912	up	ENSMUSG00000042459	Bpifa2	BPI fold-containing family A member 2 [Source:UniProtKB/Swiss-Prot;Acc:P07743]
226610	ENSMUST00000128373	6.67923	0.0075109	0.350359	up	ENSMUSG00000060568	Fam78b	Protein FAM78B [Source:UniProtKB/Swiss-Prot;Acc:Q8BQN5]
93742	ENSMUST00000162602	6.65783	0.0212195	0.50421	up	ENSMUSG00000025812	Pard3	par-3 family cell polarity regulator [Source:MGI Symbol;Acc:MGI:2135608]
76614	ENSMUST00000166975	6.65482	0.0196182	0.491275	up	ENSMUSG00000052337	Immt	MICOS complex subunit Mic60 [Source:UniProtKB/Swiss-Prot;Acc:Q8CAQ8]
67839	ENSMUST00000066936	6.63738	0.0254816	0.533307	up	ENSMUSG00000026930	Gpsm1	Mus musculus G-protein signalling modulator 1 (AGS3-like, C. elegans) (Gpsm1), transcript variant 5, mRNA. [Source:RefSeq mRNA;Acc:NM_001355575]
54135	ENSMUST00000108116	6.60699	0.0154651	0.455923	up	ENSMUSG00000001247	Lsr	Lipolysis-stimulated lipoprotein receptor [Source:UniProtKB/Swiss-Prot;Acc:Q99KG5]
12704	ENSMUST00000145363	6.58792	0.0107072	0.403833	up	ENSMUSG00000029516	Cit	citron rho-interacting serine/threonine kinase [Source:HGNC Symbol;Acc:HGNC:1985]
18029	ENSMUST00000020461	6.58753	0.0273716	0.543637	up	ENSMUSG00000055053	Nfic	Nuclear factor 1 C-type [Source:UniProtKB/Swiss-Prot;Acc:P70255]
21335	ENSMUST00000074849	6.55263	0.0103599	0.397884	up	ENSMUSG00000037313	Tacc3	transforming, acidic coiled-coil containing protein 3 [Source:MGI Symbol;Acc:MGI:1341163]
68957	ENSMUST00000147948	6.54954	3.47651e-05	0.0196092	up	ENSMUSG00000041423	Paqr6	progestin and adipoQ receptor family member VI [Source:MGI Symbol;Acc:MGI:1916207]
55932	ENSMUST00000106222	6.54952	0.0344692	0.577485	up	ENSMUSG00000028268	Gbp3	Mus musculus guanylate binding protein 3 (Gbp3), transcript variant 4, mRNA. [Source:RefSeq mRNA;Acc:NM_001355403]
18018	ENSMUST00000167977	6.53938	0.0332844	0.571715	up	ENSMUSG00000033016	Nfatc1	nuclear factor of activated T cells, cytoplasmic, calcineurin dependent 1
51944	ENSMUST00000110842	6.5157	0.000642754	0.111744	up	ENSMUSG00000027331	Knstrn	Small kinetochore-associated protein [Source:UniProtKB/Swiss-Prot;Acc:Q9D9Z1]
268958	ENSMUST00000120717	6.49329	0.00208523	0.191149	up	ENSMUSG00000058626	Capn11	Calpain-11 [Source:UniProtKB/Swiss-Prot;Acc:Q6J756]
14962	ENSMUST00000025229	6.47632	0.0245941	0.528596	up	ENSMUSG00000090231	Cfb	Complement factor B Complement factor B Ba fragment Complement factor B Bb fragment [Source:UniProtKB/Swiss-Prot;Acc:P04186]
19158	ENSMUST00000211783	6.46085	0.0326148	0.570845	up	ENSMUSG00000003269	Cyth2	Cytohesin-2 [Source:UniProtKB/Swiss-Prot;Acc:P63034]
18018	ENSMUST00000035800	6.45556	0.0398578	0.598551	up	ENSMUSG00000033016	Nfatc1	nuclear factor of activated T cells, cytoplasmic, calcineurin dependent 1
170676	ENSMUST00000176204	6.45104	0.0217161	0.508789	up	ENSMUSG00000092035	Peg10	Mus musculus paternally expressed 10 (Peg10), transcript variant 1, mRNA. [Source:RefSeq mRNA;Acc:NM_130877]
56427	ENSMUST00000069503	6.4464	0.0113597	0.415613	up	ENSMUSG00000020513	Tubd1	tubulin, delta 1 [Source:MGI Symbol;Acc:MGI:1891826]
13555	ENSMUST00000000894	6.40991	0.0158585	0.458364	up	ENSMUSG00000027490	E2f1	Transcription factor E2F1 [Source:UniProtKB/Swiss-Prot;Acc:Q61501]
72119	ENSMUST00000028969	6.39934	0.0159915	0.459748	up	ENSMUSG00000027469	Tpx2	Targeting protein for Xklp2 [Source:UniProtKB/Swiss-Prot;Acc:A2APB8]
269514	ENSMUST00000039234	6.39496	0.0108374	0.406743	up	ENSMUSG00000040410	Fbxl4	F-box/LRR-repeat protein 4 [Source:UniProtKB/Swiss-Prot;Acc:Q8BH70]
64899	ENSMUST00000040872	6.3939	0.00473681	0.285439	up	ENSMUSG00000027412	Lpin3	Phosphatidate phosphatase LPIN3 [Source:UniProtKB/Swiss-Prot;Acc:Q99PI4]
269346	ENSMUST00000110525	6.39197	0.00828785	0.365095	up	ENSMUSG00000027219	Slc28a2	Mus musculus solute carrier family 28 (sodium-coupled nucleoside transporter), member 2 (Slc28a2), transcript variant 2, mRNA. [Source:RefSeq mRNA;Acc:NM_001356532]
56488	ENSMUST00000109961	6.36128	0.00575378	0.310004	up	ENSMUSG00000036992	Nxt1	NTF2-related export protein 1 [Source:UniProtKB/Swiss-Prot;Acc:Q9QZV9]
227738	ENSMUST00000028132	6.35856	0.0236232	0.522134	up	ENSMUSG00000026792	Lrsam1	E3 ubiquitin-protein ligase LRSAM1 [Source:UniProtKB/Swiss-Prot;Acc:Q80ZI6]
103080	ENSMUST00000165971	6.31654	0.0127824	0.429322	up	ENSMUSG00000019917	Sept10	septin 10
20466	ENSMUST00000168177	6.30876	0.013792	0.438881	up	ENSMUSG00000042557	Sin3a	Mus musculus transcriptional regulator, SIN3A (yeast) (Sin3a), transcript variant 4, mRNA. [Source:RefSeq mRNA;Acc:NM_001357754]
66531	ENSMUST00000078589	6.30529	3.4561e-05	0.0196092	up	ENSMUSG00000014633	Cmc2	COX assembly mitochondrial [Source:UniProtKB/Swiss-Prot;Acc:Q8K199]
234736	ENSMUST00000212958	6.28204	0.0164146	0.462281	up	ENSMUSG00000033596	Rfwd3	E3 ubiquitin-protein ligase RFWD3 [Source:UniProtKB/Swiss-Prot;Acc:Q8CIK8]
217216	ENSMUST00000140040	6.28074	1.56423e-05	0.0124409	up	ENSMUSG00000034773	BC030867	Uncharacterized [Source:UniProtKB/Swiss-Prot;Acc:Q32P12]
93840	ENSMUST00000111263	6.2711	0.0218704	0.509271	up	ENSMUSG00000026556	Vangl2	VANGL planar cell polarity 2 [Source:MGI Symbol;Acc:MGI:2135272]
13685	ENSMUST00000033880	6.26667	0.0234191	0.521092	up	ENSMUSG00000031490	Eif4ebp1	eukaryotic translation initiation factor 4E binding protein 1 [Source:MGI Symbol;Acc:MGI:103267]
74016	ENSMUST00000128663	6.26296	0.0404948	0.600279	up	ENSMUSG00000026873	Phf19	PHD finger protein 19 [Source:UniProtKB/Swiss-Prot;Acc:Q9CXG9]
57442	ENSMUST00000208260	6.24912	0.000726435	0.119123	up	ENSMUSG00000035165	Kcne3	Potassium voltage-gated channel subfamily E member 3 [Source:UniProtKB/Swiss-Prot;Acc:Q9WTW2]
233789	ENSMUST00000032891	6.24136	0.0408145	0.600877	up	ENSMUSG00000030655	Smg1	Serine/threonine-protein kinase SMG1 [Source:UniProtKB/Swiss-Prot;Acc:Q8BKX6]
52023	ENSMUST00000227969	6.2123	0.0229643	0.518275	up	ENSMUSG00000022064	Pibf1	progesterone immunomodulatory binding factor 1
235493	ENSMUST00000170846	6.20286	0.0178805	0.47737	up	ENSMUSG00000034858	Fam214a	Protein FAM214A [Source:UniProtKB/Swiss-Prot;Acc:Q69ZK7]
380753	ENSMUST00000144586	6.2001	0.00852551	0.367554	up	ENSMUSG00000020564	Atxn7l1	Ataxin-7-like protein 1 [Source:UniProtKB/Swiss-Prot;Acc:Q9CZ05]
319758	ENSMUST00000183372	6.18129	0.0148385	0.448921	up	ENSMUSG00000037674	Rfx7	regulatory factor X7 [Source:HGNC Symbol;Acc:HGNC:25777]
16548	ENSMUST00000202752	6.12815	0.000457643	0.0902785	up	ENSMUSG00000029162	Khk	ketohexokinase [Source:HGNC Symbol;Acc:HGNC:6315]
13026	ENSMUST00000079791	6.0679	0.0156394	0.457042	up	ENSMUSG00000005615	Pcyt1a	Choline-phosphate cytidylyltransferase A [Source:UniProtKB/Swiss-Prot;Acc:P49586]
233406	ENSMUST00000206178	6.06348	7.95604e-05	0.0333506	up	ENSMUSG00000038943	Prc1	protein regulator of cytokinesis 1 [Source:MGI Symbol;Acc:MGI:1858961]
14199	ENSMUST00000114772	6.05513	0.0232269	0.520174	up	ENSMUSG00000023092	Fhl1	Four and a half LIM domains protein 1 [Source:UniProtKB/Swiss-Prot;Acc:P97447]
108907	ENSMUST00000068225	6.04838	0.00844168	0.366765	up	ENSMUSG00000027306	Nusap1	Nucleolar and spindle-associated protein 1 [Source:UniProtKB/Swiss-Prot;Acc:Q9ERH4]
54392	ENSMUST00000198274	6.02268	0.00346434	0.243909	up	ENSMUSG00000015880	Ncapg	non-SMC condensin I complex subunit G [Source:HGNC Symbol;Acc:HGNC:24304]
72692	ENSMUST00000184889	6.00614	0.0313056	0.565385	up	ENSMUSG00000024095	Hnrnpll	Heteroous nuclear ribonucleoprotein L-like [Source:UniProtKB/Swiss-Prot;Acc:Q921F4]
20419	ENSMUST00000208856	5.99385	0.00174575	0.175362	up	ENSMUSG00000022322	Shcbp1	SHC SH2 domain-binding protein 1 [Source:UniProtKB/Swiss-Prot;Acc:Q9Z179]
93734	ENSMUST00000023360	5.98494	0.0369496	0.588443	up	ENSMUSG00000022679	Mpv17l	Mpv17-like protein [Source:UniProtKB/Swiss-Prot;Acc:Q99MS3]
20877	ENSMUST00000140531	5.98349	0.000258304	0.0663434	up	ENSMUSG00000020897	Aurkb	Aurora kinase B [Source:UniProtKB/Swiss-Prot;Acc:O70126]
231801	ENSMUST00000151839	5.97912	0.00831179	0.365151	up	ENSMUSG00000029722	Agfg2	Arf-GAP domain and FG repeat-containing protein 2 [Source:UniProtKB/Swiss-Prot;Acc:Q80WC7]
20454	ENSMUST00000114112	5.97279	0.0318606	0.567752	up	ENSMUSG00000056091	St3gal5	Lactosylceramide alpha-2,3-sialyltransferase [Source:UniProtKB/Swiss-Prot;Acc:O88829]
72151	ENSMUST00000150962	5.96255	0.0275398	0.544461	up	ENSMUSG00000029363	Rfc5	replication factor C (activator 1) 5 [Source:MGI Symbol;Acc:MGI:1919401]
21749	ENSMUST00000027057	5.96074	0.0134098	0.437072	up	ENSMUSG00000025925	Terf1	Telomeric repeat-binding factor 1 [Source:UniProtKB/Swiss-Prot;Acc:P70371]
26379	ENSMUST00000025906	5.9486	0.0135901	0.438881	up	ENSMUSG00000024955	Esrra	Steroid hormone receptor ERR1 [Source:UniProtKB/Swiss-Prot;Acc:O08580]
104111	ENSMUST00000124505	5.94432	0.0120549	0.422132	up	ENSMUSG00000020654	Adcy3	Adenylate cyclase type 3 [Source:UniProtKB/Swiss-Prot;Acc:Q8VHH7]
241447	ENSMUST00000176018	5.93089	0.0354868	0.581128	up	ENSMUSG00000027035	Cers6	Ceramide synthase 6 [Source:UniProtKB/Swiss-Prot;Acc:Q8C172]
327762	ENSMUST00000139212	5.91806	0.0357873	0.582868	up	ENSMUSG00000036875	Dna2	DNA replication ATP-dependent helicase/nuclease DNA2 DNA replication nuclease DNA2 DNA replication ATP-dependent helicase DNA2 [Source:UniProtKB/Swiss-Prot;Acc:Q6ZQJ5]
433926	ENSMUST00000112707	5.91749	0.0339869	0.575276	up	ENSMUSG00000070639	Lrrc8b	Volume-regulated anion channel subunit LRRC8B [Source:UniProtKB/Swiss-Prot;Acc:Q5DU41]
268902	ENSMUST00000140062	5.91726	0.0405561	0.600347	up	ENSMUSG00000052516	Robo2	roundabout guidance receptor 2 [Source:MGI Symbol;Acc:MGI:1890110]
21780	ENSMUST00000092430	5.9109	0.0331235	0.571539	up	ENSMUSG00000003923	Tfam	transcription factor A, mitochondrial [Source:MGI Symbol;Acc:MGI:107810]
15400	ENSMUST00000114434	5.91077	0.0382226	0.593655	up	ENSMUSG00000079560	Hoxa3	Homeobox protein Hox-A3 [Source:UniProtKB/Swiss-Prot;Acc:P02831]
110196	ENSMUST00000081848	5.90516	0.00322718	0.235247	up	ENSMUSG00000059743	Fdps	Farnesyl pyrophosphate synthase [Source:UniProtKB/Swiss-Prot;Acc:Q920E5]
-	ENSMUST00000177817	5.87882	0.0481897	0.604758	up	ENSMUSG00000095280	Gm21738	-
231866	ENSMUST00000077485	5.86646	0.0121484	0.422861	up	ENSMUSG00000029587	Zfp12	zinc finger protein 12 [Source:MGI Symbol;Acc:MGI:99157]
69710	ENSMUST00000098243	5.86085	0.0224122	0.513266	up	ENSMUSG00000032812	Arap1	Arf-GAP with Rho-GAP domain, ANK repeat and PH domain-containing protein 1 [Source:UniProtKB/Swiss-Prot;Acc:Q4LDD4]
109900	ENSMUST00000161094	5.85026	0.0166781	0.465895	up	ENSMUSG00000025533	Asl	Argininosuccinate lyase [Source:UniProtKB/Swiss-Prot;Acc:Q91YI0]
27373	ENSMUST00000120859	5.84837	0.0274652	0.543937	up	ENSMUSG00000022433	Csnk1e	Casein kinase I isoform epsilon [Source:UniProtKB/Swiss-Prot;Acc:Q9JMK2]
211651	ENSMUST00000143535	5.83288	9.27616e-05	0.0368475	up	ENSMUSG00000034023	Fancd2	Fanconi anemia group D2 protein homolog [Source:UniProtKB/Swiss-Prot;Acc:Q80V62]
71878	ENSMUST00000151801	5.82388	0.00742587	0.3498	up	ENSMUSG00000027654	Fam83d	Protein FAM83D [Source:UniProtKB/Swiss-Prot;Acc:Q9D7I8]
16582	ENSMUST00000169353	5.81901	0.0299108	0.558834	up	ENSMUSG00000031788	Kifc3	Kinesin-like protein KIFC3 [Source:UniProtKB/Swiss-Prot;Acc:O35231]
93790	ENSMUST00000126604	5.81885	0.00157419	0.1718	up	ENSMUSG00000030452	Nipa2	Magnesium transporter NIPA2 [Source:UniProtKB/Swiss-Prot;Acc:Q9JJC8]
233406	ENSMUST00000173824	5.81618	0.00403327	0.266121	up	ENSMUSG00000038943	Prc1	protein regulator of cytokinesis 1 [Source:MGI Symbol;Acc:MGI:1858961]
12617	ENSMUST00000199392	5.81455	0.00226706	0.198793	up	ENSMUSG00000029253	Cenpc1	Centromere protein C [Source:UniProtKB/Swiss-Prot;Acc:P49452]
22241	ENSMUST00000200299	5.79596	0.000141036	0.0480784	up	ENSMUSG00000029512	Ulk1	unc-51 like kinase 1 [Source:MGI Symbol;Acc:MGI:1270126]
105787	ENSMUST00000051186	5.78045	0.0174285	0.47253	up	ENSMUSG00000050697	Prkaa1	protein kinase, AMP-activated, alpha 1 catalytic subunit
19164	ENSMUST00000223542	5.77297	3.23577e-05	0.0190616	up	ENSMUSG00000019969	Psen1	presenilin 1
320538	ENSMUST00000159215	5.76393	0.0164018	0.462028	up	ENSMUSG00000038538	Ubn2	ubinuclein 2 [Source:MGI Symbol;Acc:MGI:2444236]
623474	ENSMUST00000108306	5.76229	1.35068e-05	0.0111699	up	ENSMUSG00000078773	Rad54b	DNA repair and recombination protein RAD54B [Source:UniProtKB/Swiss-Prot;Acc:Q6PFE3]
101772	ENSMUST00000152531	5.72233	0.0153028	0.453693	up	ENSMUSG00000031075	Ano1	Anoctamin-1 [Source:UniProtKB/Swiss-Prot;Acc:Q8BHY3]
19752	ENSMUST00000080126	5.70714	0.00831387	0.365151	up	ENSMUSG00000035896	Rnase1	ribonuclease, RNase A family, 1 (pancreatic)
114674	ENSMUST00000016086	5.70533	0.0287958	0.551892	up	ENSMUSG00000015942	Gtf2ird2	ral transcription factor II-I repeat domain-containing protein 2 [Source:UniProtKB/Swiss-Prot;Acc:Q99NI3]
192976	ENSMUST00000143262	5.6872	0.019994	0.493921	up	ENSMUSG00000046417	Lrrc75a	Leucine-rich repeat-containing protein 75A [Source:UniProtKB/Swiss-Prot;Acc:Q7TSF4]
16801	ENSMUST00000117419	5.68583	0.0155804	0.457042	up	ENSMUSG00000040940	Arhgef1	Rho guanine nucleotide exchange factor 1 [Source:UniProtKB/Swiss-Prot;Acc:Q61210]
74041	ENSMUST00000208356	5.68566	0.00384383	0.260138	up	ENSMUSG00000030641	Ddias	Mus musculus DNA damage-induced apoptosis suppressor (Ddias), transcript variant 2, mRNA. [Source:RefSeq mRNA;Acc:NM_001355126]
17846	ENSMUST00000071068	5.67736	0.000131855	0.0467979	up	ENSMUSG00000051355	Commd1	COMM domain-containing protein 1 [Source:UniProtKB/Swiss-Prot;Acc:Q8K4M5]
98256	ENSMUST00000142223	5.66188	0.0119405	0.420851	up	ENSMUSG00000039783	Kmo	Kynurenine 3-monooxygenase [Source:UniProtKB/Swiss-Prot;Acc:Q91WN4]
13433	ENSMUST00000178110	5.64851	0.0186394	0.483965	up	ENSMUSG00000004099	Dnmt1	DNA (cytosine-5)-methyltransferase 1 [Source:UniProtKB/Swiss-Prot;Acc:P13864]
11465	ENSMUST00000128055	5.64401	0.0172747	0.471329	up	ENSMUSG00000062825	Actg1	Actin, cytoplasmic 2 Actin, cytoplasmic 2, N-terminally processed [Source:UniProtKB/Swiss-Prot;Acc:P63260]
238803	ENSMUST00000056558	5.64345	0.0445162	0.604758	up	ENSMUSG00000050919	Zfp366	zinc finger protein 366 [Source:MGI Symbol;Acc:MGI:2178429]
12493	ENSMUST00000033063	5.62717	0.00800439	0.360415	up	ENSMUSG00000030798	Cd37	Leukocyte antigen CD37 [Source:UniProtKB/Swiss-Prot;Acc:Q61470]
16511	ENSMUST00000129246	5.62039	0.0145924	0.447373	up	ENSMUSG00000038319	Kcnh2	potassium voltage-gated channel subfamily H member 2 [Source:HGNC Symbol;Acc:HGNC:6251]
66938	ENSMUST00000142891	5.61808	0.0260045	0.537151	up	ENSMUSG00000073758	Sh3d21	SH3 domain containing 21 [Source:MGI Symbol;Acc:MGI:1914188]
70681	ENSMUST00000117364	5.61805	0.0192261	0.488279	up	ENSMUSG00000035234	Abraxas1	BRCA1 A complex subunit [Source:MGI Symbol;Acc:MGI:1917931]
68832	ENSMUST00000169104	5.60771	0.00740122	0.349303	up	ENSMUSG00000037669	Ldah	lipid droplet associated hydrolase
330361	ENSMUST00000132301	5.59717	0.0188032	0.48519	up	ENSMUSG00000035125	Gcfc2	GC-rich sequence DNA-binding factor 2 [Source:UniProtKB/Swiss-Prot;Acc:Q8BKT3]
72119	ENSMUST00000178997	5.58464	0.0483063	0.604758	up	ENSMUSG00000027469	Tpx2	Targeting protein for Xklp2 [Source:UniProtKB/Swiss-Prot;Acc:A2APB8]
103968	ENSMUST00000205553	5.57642	5.40328e-05	0.0252849	up	ENSMUSG00000030546	Plin1	Perilipin-1 [Source:UniProtKB/Swiss-Prot;Acc:Q8CGN5]
26373	ENSMUST00000160961	5.55159	0.0315474	0.566704	up	ENSMUSG00000036636	Clcn7	H(+)/Cl(-) exchange transporter 7 [Source:UniProtKB/Swiss-Prot;Acc:O70496]
68695	ENSMUST00000206074	5.54804	0.000102372	0.0396227	up	ENSMUSG00000030532	Hddc3	Guanosine-3',5'-bis(diphosphate) 3'-pyrophosphohydrolase MESH1 [Source:UniProtKB/Swiss-Prot;Acc:Q9D114]
20811	ENSMUST00000016498	5.53187	0.0305643	0.561769	up	ENSMUSG00000027579	Srms	src-related kinase lacking C-terminal regulatory tyrosine and N-terminal myristylation sites [Source:MGI Symbol;Acc:MGI:101865]
68106	ENSMUST00000092688	5.53023	0.0256257	0.534404	up	ENSMUSG00000017176	Nt5c3b	5'-nucleotidase, cytosolic IIIB [Source:MGI Symbol;Acc:MGI:1915356]
74694	ENSMUST00000064107	5.52391	0.00836329	0.365487	up	ENSMUSG00000052302	Tbc1d30	TBC1 domain family, member 30
623661	ENSMUST00000142670	5.51876	0.00433154	0.274366	up	ENSMUSG00000037216	Lipt1	Lipoyltransferase 1, mitochondrial [Source:UniProtKB/Swiss-Prot;Acc:Q8VCM4]
93765	ENSMUST00000099329	5.51561	0.0439884	0.604758	up	ENSMUSG00000074781	Ube2n	ubiquitin-conjugating enzyme E2N
75906	ENSMUST00000165986	5.50377	0.0050707	0.293782	up	ENSMUSG00000019856	Fam184a	family with sequence similarity 184 member A [Source:HGNC Symbol;Acc:HGNC:20991]
72568	ENSMUST00000194847	5.45801	0.0128824	0.430225	up	ENSMUSG00000058729	Lin9	lin-9 DREAM MuvB core complex component [Source:HGNC Symbol;Acc:HGNC:30830]
22589	ENSMUST00000137453	5.45255	0.00111928	0.141841	up	ENSMUSG00000031229	Atrx	Transcriptional regulator ATRX [Source:UniProtKB/Swiss-Prot;Acc:Q61687]
69871	ENSMUST00000152298	5.4499	0.00581305	0.311623	up	ENSMUSG00000029725	Ppp1r35	Protein phosphatase 1 regulatory subunit 35 [Source:UniProtKB/Swiss-Prot;Acc:Q9D8C8]
72844	ENSMUST00000162321	5.43181	0.00215432	0.19396	up	ENSMUSG00000033287	Kctd17	BTB/POZ domain-containing protein KCTD17 isoform 3 [Source:RefSeq peptide;Acc:NP_001276602]
232670	ENSMUST00000115250	5.4314	0.0103403	0.397852	up	ENSMUSG00000001763	Tspan33	Tetraspanin-33 [Source:UniProtKB/Swiss-Prot;Acc:Q8R3S2]
50706	ENSMUST00000107985	5.39085	0.0364631	0.586296	up	ENSMUSG00000027750	Postn	periostin, osteoblast specific factor [Source:MGI Symbol;Acc:MGI:1926321]
17999	ENSMUST00000184333	5.37911	0.0163347	0.461629	up	ENSMUSG00000032216	Nedd4	neural precursor cell expressed, developmentally down-regulated 4 [Source:MGI Symbol;Acc:MGI:97297]
231807	ENSMUST00000048421	5.37152	0.0199207	0.492971	up	ENSMUSG00000036948	BC037034	chromosome 7 open reading frame 43 [Source:HGNC Symbol;Acc:HGNC:25604]
50721	ENSMUST00000119324	5.34861	0.00400272	0.265548	up	ENSMUSG00000034748	Sirt6	sirtuin 6 [Source:MGI Symbol;Acc:MGI:1354161]
14083	ENSMUST00000110036	5.33333	0.0232408	0.520242	up	ENSMUSG00000022607	Ptk2	PTK2 protein tyrosine kinase 2
233246	ENSMUST00000207717	5.32621	0.0461621	0.604758	up	ENSMUSG00000055489	Ano5	Anoctamin-5 [Source:UniProtKB/Swiss-Prot;Acc:Q75UR0]
241612	ENSMUST00000146664	5.32374	0.0211536	0.503784	up	ENSMUSG00000041644	Slc5a12	solute carrier family 5 (sodium/glucose cotransporter), member 12 [Source:MGI Symbol;Acc:MGI:2138890]
18753	ENSMUST00000112211	5.31134	0.0025324	0.208805	up	ENSMUSG00000021948	Prkcd	protein kinase C, delta [Source:MGI Symbol;Acc:MGI:97598]
70082	ENSMUST00000034702	5.30069	0.0479879	0.604758	up	ENSMUSG00000032184	Lysmd2	LysM, putative peptidoglycan-binding, domain containing 2 [Source:MGI Symbol;Acc:MGI:1917332]
13353	ENSMUST00000151266	5.27108	0.0402322	0.599863	up	ENSMUSG00000003531	Dgcr6	DiGeorge syndrome critical region gene 6
217869	ENSMUST00000050993	5.26294	0.0432165	0.604758	up	ENSMUSG00000021282	Eif5	eukaryotic translation initiation factor 5
68558	ENSMUST00000022164	5.2416	0.0127445	0.429086	up	ENSMUSG00000021661	Ankra2	Ankyrin repeat family A protein 2 [Source:UniProtKB/Swiss-Prot;Acc:Q99PE2]
21973	ENSMUST00000154332	5.23995	0.00650007	0.328269	up	ENSMUSG00000020914	Top2a	DNA topoisomerase 2-alpha [Source:UniProtKB/Swiss-Prot;Acc:Q01320]
13972	ENSMUST00000000904	5.23574	0.0375645	0.591763	up	ENSMUSG00000000884	Gnb1l	guanine nucleotide binding protein (G protein), beta polypeptide 1-like [Source:MGI Symbol;Acc:MGI:1338057]
28169	ENSMUST00000001240	5.2262	0.018689	0.483965	up	ENSMUSG00000001211	Agpat3	1-acyl-sn-glycerol-3-phosphate acyltransferase gamma [Source:UniProtKB/Swiss-Prot;Acc:Q9D517]
217370	ENSMUST00000137299	5.22008	0.0190595	0.486776	up	ENSMUSG00000039294	BC017643	Uncharacterized [Source:UniProtKB/Swiss-Prot;Acc:Q3TYS2]
14118	ENSMUST00000103234	5.21197	0.000949842	0.130116	up	ENSMUSG00000027204	Fbn1	Fibrillin-1 Asprosin [Source:UniProtKB/Swiss-Prot;Acc:Q61554]
692245	ENSMUST00000103365	5.20826	0.0020126	0.187083	up	ENSMUSG00000076564	Igkv12-46	immunoglobulin kappa variable 12-46
17260	ENSMUST00000195904	5.2075	0.00380492	0.259388	up	ENSMUSG00000005583	Mef2c	Mus musculus myocyte enhancer factor 2C (Mef2c), transcript variant 14, mRNA. [Source:RefSeq mRNA;Acc:NM_001347577]
68014	ENSMUST00000138075	5.20165	0.0073677	0.349303	up	ENSMUSG00000032400	Zwilch	zwilch kinetochore protein [Source:MGI Symbol;Acc:MGI:1915264]
217216	ENSMUST00000133930	5.19968	0.00524823	0.296431	up	ENSMUSG00000034773	BC030867	Uncharacterized [Source:UniProtKB/Swiss-Prot;Acc:Q32P12]
338363	ENSMUST00000050228	5.19815	0.0364327	0.586244	up	ENSMUSG00000049411	Tmem241	Transmembrane protein 241 [Source:UniProtKB/Swiss-Prot;Acc:Q3UME2]
58223	ENSMUST00000219404	5.19769	0.0180318	0.478534	up	ENSMUSG00000025355	Mmp19	matrix metallopeptidase 19
66845	ENSMUST00000202243	5.18993	0.00564042	0.307088	up	ENSMUSG00000106918	Mrpl33	39S ribosomal protein L33, mitochondrial [Source:UniProtKB/Swiss-Prot;Acc:Q9CQP0]
21638	ENSMUST00000103554	5.18478	0.000188392	0.057821	up	ENSMUSG00000076745	Tcrg-V4	T cell receptor gamma, variable 4
54392	ENSMUST00000117396	5.17236	0.0192278	0.488279	up	ENSMUSG00000015880	Ncapg	non-SMC condensin I complex subunit G [Source:HGNC Symbol;Acc:HGNC:24304]
68279	ENSMUST00000169533	5.16791	0.00227846	0.199247	up	ENSMUSG00000011008	Mcoln2	Mucolipin-2 [Source:UniProtKB/Swiss-Prot;Acc:Q8K595]
20392	ENSMUST00000101677	5.16778	0.0232035	0.519848	up	ENSMUSG00000004631	Sgce	Epsilon-sarcoglycan [Source:UniProtKB/Swiss-Prot;Acc:O70258]
102920	ENSMUST00000144678	5.16434	0.00726432	0.347133	up	ENSMUSG00000031262	Cenpi	Centromere protein I [Source:UniProtKB/Swiss-Prot;Acc:Q8K1K4]
641376	ENSMUST00000111326	5.15179	0.0429024	0.604758	up	ENSMUSG00000005674	Tomm40l	Mitochondrial import receptor subunit TOM40B [Source:UniProtKB/Swiss-Prot;Acc:Q9CZR3]
107684	ENSMUST00000139179	5.14808	0.00372252	0.255988	up	ENSMUSG00000028337	Coro2a	Coronin-2A [Source:UniProtKB/Swiss-Prot;Acc:Q8C0P5]
72119	ENSMUST00000109816	5.14509	0.0325793	0.570845	up	ENSMUSG00000027469	Tpx2	Targeting protein for Xklp2 [Source:UniProtKB/Swiss-Prot;Acc:A2APB8]
192200	ENSMUST00000051272	5.1001	0.0029572	0.22523	up	ENSMUSG00000042845	Wfdc12	WAP four-disulfide core domain 12 [Source:MGI Symbol;Acc:MGI:2183434]
70829	ENSMUST00000152959	5.09247	0.0133267	0.435915	up	ENSMUSG00000026339	Ccdc93	Coiled-coil domain-containing protein 93 [Source:UniProtKB/Swiss-Prot;Acc:Q7TQK5]
235493	ENSMUST00000214755	5.09154	0.0264493	0.539621	up	ENSMUSG00000034858	Fam214a	Protein FAM214A [Source:UniProtKB/Swiss-Prot;Acc:Q69ZK7]
24131	ENSMUST00000022330	5.09059	0.0168925	0.467768	up	ENSMUSG00000021798	Ldb3	LIM domain binding 3
56708	ENSMUST00000132305	5.07547	0.0222016	0.512036	up	ENSMUSG00000040663	Clcf1	Cardiotrophin-like cytokine factor 1 [Source:UniProtKB/Swiss-Prot;Acc:Q9QZM3]
77938	ENSMUST00000106165	5.06065	0.0166425	0.465528	up	ENSMUSG00000030956	Fam53b	Mus musculus family with sequence similarity 53, member B (Fam53b), transcript variant 3, mRNA. [Source:RefSeq mRNA;Acc:NM_001347630]
320244	ENSMUST00000095536	5.04466	0.0155857	0.457042	up	ENSMUSG00000012609	Ttll5	tubulin tyrosine ligase-like family, member 5 [Source:MGI Symbol;Acc:MGI:2443657]
23888	ENSMUST00000125435	5.04269	0.023129	0.51943	up	ENSMUSG00000058571	Gpc6	glypican 6 [Source:MGI Symbol;Acc:MGI:1346322]
71721	ENSMUST00000220442	5.04107	0.00495182	0.290751	up	ENSMUSG00000043259	Fam13c	Protein FAM13C [Source:UniProtKB/Swiss-Prot;Acc:Q9DBR2]
225908	ENSMUST00000190922	5.03394	0.00214292	0.193661	up	ENSMUSG00000036098	Myrf	Myelin regulatory factor Myelin regulatory factor, N-terminal Myelin regulatory factor, C-terminal [Source:UniProtKB/Swiss-Prot;Acc:Q3UR85]
170707	ENSMUST00000105837	5.0048	0.00633042	0.323883	up	ENSMUSG00000043411	Usp48	ubiquitin specific peptidase 48 [Source:MGI Symbol;Acc:MGI:2158502]
629756	ENSMUST00000094344	4.99854	0.000554043	0.101528	up	ENSMUSG00000070529	Wfdc10	WAP four-disulfide core domain 10 [Source:MGI Symbol;Acc:MGI:3616889]
212974	ENSMUST00000079403	4.99602	0.0435642	0.604758	up	ENSMUSG00000062031	Pgghg	Protein-glucosylgalactosylhydroxylysine glucosidase [Source:UniProtKB/Swiss-Prot;Acc:Q8BP56]
12580	ENSMUST00000097921	4.9873	0.0449899	0.604758	up	ENSMUSG00000028551	Cdkn2c	Cyclin-dependent kinase 4 inhibitor C [Source:UniProtKB/Swiss-Prot;Acc:Q60772]
269152	ENSMUST00000193931	4.9852	0.0230256	0.518808	up	ENSMUSG00000026494	Kif26b	Kinesin-like protein KIF26B [Source:UniProtKB/Swiss-Prot;Acc:Q7TNC6]
81845	ENSMUST00000165306	4.98089	0.0207608	0.499835	up	ENSMUSG00000092417	Gpank1	G patch domain and ankyrin repeats 1 [Source:MGI Symbol;Acc:MGI:2148975]
16159	ENSMUST00000191910	4.97571	0.00151053	0.168951	up	ENSMUSG00000027776	Il12a	interleukin 12a [Source:MGI Symbol;Acc:MGI:96539]
338467	ENSMUST00000201754	4.93732	0.0387586	0.594682	up	ENSMUSG00000039456	Morc3	MORC family CW-type zinc finger protein 3 [Source:UniProtKB/Swiss-Prot;Acc:F7BJB9]
20354	ENSMUST00000021900	4.92874	0.0218308	0.509271	up	ENSMUSG00000021451	Sema4d	Semaphorin-4D [Source:UniProtKB/Swiss-Prot;Acc:O09126]
22260	ENSMUST00000073488	4.92584	0.0481436	0.604758	up	ENSMUSG00000060601	Nr1h2	Oxysterols receptor LXR-beta [Source:UniProtKB/Swiss-Prot;Acc:Q60644]
50883	ENSMUST00000066160	4.90909	0.0208755	0.501339	up	ENSMUSG00000029521	Chek2	Serine/threonine-protein kinase Chk2 [Source:UniProtKB/Swiss-Prot;Acc:Q9Z265]
22751	ENSMUST00000213045	4.89573	0.0117371	0.419536	up	ENSMUSG00000031907	Zfp90	zinc finger protein 90 [Source:MGI Symbol;Acc:MGI:104786]
72119	ENSMUST00000164120	4.88746	0.0379527	0.592889	up	ENSMUSG00000027469	Tpx2	Targeting protein for Xklp2 [Source:UniProtKB/Swiss-Prot;Acc:A2APB8]
12818	ENSMUST00000125416	4.8709	0.049742	0.604758	up	ENSMUSG00000022371	Col14a1	Collagen alpha-1(XIV) chain [Source:UniProtKB/Swiss-Prot;Acc:Q80X19]
66583	ENSMUST00000112123	4.85962	0.0190737	0.486853	up	ENSMUSG00000034321	Exosc1	exosome component 1
16443	ENSMUST00000154967	4.84926	0.0134697	0.437721	up	ENSMUSG00000022957	Itsn1	Intersectin-1 [Source:UniProtKB/Swiss-Prot;Acc:Q9Z0R4]
320111	ENSMUST00000163887	4.8346	0.0244358	0.52825	up	ENSMUSG00000055945	Prr18	proline rich 18
214240	ENSMUST00000110843	4.83202	0.0429803	0.604758	up	ENSMUSG00000040035	Disp2	2 [Source:UniProtKB/Swiss-Prot;Acc:Q8CIP5]
228355	ENSMUST00000111376	4.81908	0.0488108	0.604758	up	ENSMUSG00000040687	Madd	MAP-kinase activating death domain [Source:MGI Symbol;Acc:MGI:2444672]
100503043	ENSMUST00000124226	4.81105	0.000105452	0.0403031	up	ENSMUSG00000049804	Armcx4	armadillo repeat containing, X-linked 4 [Source:MGI Symbol;Acc:MGI:2147887]
235574	ENSMUST00000112558	4.80488	0.0102373	0.396322	up	ENSMUSG00000032570	Atp2c1	Calcium-transporting ATPase type 2C member 1 [Source:UniProtKB/Swiss-Prot;Acc:Q80XR2]
14131	ENSMUST00000168817	4.80482	0.0327388	0.571406	up	ENSMUSG00000059498	Fcgr3	Mus musculus Fc receptor, IgG, low affinity III (Fcgr3), transcript variant 2, mRNA. [Source:RefSeq mRNA;Acc:NM_001356511]
217692	ENSMUST00000222298	4.8018	0.034142	0.575887	up	ENSMUSG00000042700	Sipa1l1	signal-induced proliferation-associated 1 like 1
104732	ENSMUST00000196505	4.79654	0.00457367	0.27964	up	ENSMUSG00000037466	Tedc1	tubulin epsilon and delta complex 1 [Source:MGI Symbol;Acc:MGI:2144738]
233079	ENSMUST00000186534	4.78637	0.0110666	0.410493	up	ENSMUSG00000051314	Ffar2	Free fatty acid receptor 2 [Source:UniProtKB/Swiss-Prot;Acc:Q8VCK6]
78689	ENSMUST00000172166	4.76405	0.0180032	0.47846	up	ENSMUSG00000021555	Naa35	N-alpha-acetyltransferase 35, NatC auxiliary subunit [Source:UniProtKB/Swiss-Prot;Acc:Q6PHQ8]
319266	ENSMUST00000110831	4.76079	0.0203739	0.496674	up	ENSMUSG00000079144	A130010J15Rik	UPF0739 [Source:UniProtKB/Swiss-Prot;Acc:Q9DAE8]
28006	ENSMUST00000204283	4.75074	0.0126277	0.427891	up	ENSMUSG00000024104	Washc2	WASH complex subunit 2` [Source:MGI Symbol;Acc:MGI:106463]
17194	ENSMUST00000225792	4.74231	0.0236758	0.522134	up	ENSMUSG00000037780	Mbl1	mannose-binding lectin (protein A) 1
72925	ENSMUST00000110253	4.74116	0.045046	0.604758	up	ENSMUSG00000036469	March1	E3 ubiquitin-protein ligase MARCH1 [Source:UniProtKB/Swiss-Prot;Acc:Q6NZQ8]
26894	ENSMUST00000129446	4.72246	0.0437693	0.604758	up	ENSMUSG00000030127	Cops7a	Mus musculus COP9 signalosome subunit 7A (Cops7a), transcript variant 4, mRNA. [Source:RefSeq mRNA;Acc:NM_001355542]
14156	ENSMUST00000025651	4.72015	0.00495393	0.290751	up	ENSMUSG00000024742	Fen1	flap structure-specific endonuclease 1 [Source:HGNC Symbol;Acc:HGNC:3650]
18115	ENSMUST00000099149	4.71005	0.0188421	0.485307	up	ENSMUSG00000025453	Nnt	nicotinamide nucleotide transhydrogenase
231093	ENSMUST00000201168	4.70549	0.0431268	0.604758	up	ENSMUSG00000029165	Agbl5	Cytosolic carboxypeptidase-like protein 5 [Source:UniProtKB/Swiss-Prot;Acc:Q09M02]
404710	ENSMUST00000195465	4.70211	0.0456789	0.604758	up	ENSMUSG00000028068	Iqgap3	IQ motif containing GTPase activating protein 3 [Source:HGNC Symbol;Acc:HGNC:20669]
17086	ENSMUST00000006792	4.69544	0.0138452	0.438881	up	ENSMUSG00000062524	Ncr1	natural cytotoxicity triggering receptor 1 [Source:HGNC Symbol;Acc:HGNC:6731]
13607	ENSMUST00000113776	4.6911	0.0426206	0.604758	up	ENSMUSG00000059327	Eda	Ectodysplasin-A Ectodysplasin-A, membrane form Ectodysplasin-A, secreted form [Source:UniProtKB/Swiss-Prot;Acc:O54693]
26919	ENSMUST00000161077	4.68371	0.0176488	0.475126	up	ENSMUSG00000021481	Zfp346	zinc finger protein 346 [Source:MGI Symbol;Acc:MGI:1349417]
216543	ENSMUST00000109596	4.67684	0.000199155	0.0587476	up	ENSMUSG00000044066	Cep68	Centrosomal protein of 68 kDa [Source:UniProtKB/Swiss-Prot;Acc:Q8C0D9]
56490	ENSMUST00000141941	4.67327	0.00853074	0.367554	up	ENSMUSG00000022708	Zbtb20	zinc finger and BTB domain containing 20 [Source:MGI Symbol;Acc:MGI:1929213]
68957	ENSMUST00000147818	4.66743	0.0382443	0.593655	up	ENSMUSG00000041423	Paqr6	progestin and adipoQ receptor family member VI [Source:MGI Symbol;Acc:MGI:1916207]
75788	ENSMUST00000110677	4.61411	0.0385626	0.59389	up	ENSMUSG00000038780	Smurf1	E3 ubiquitin-protein ligase SMURF1 [Source:UniProtKB/Swiss-Prot;Acc:Q9CUN6]
66438	ENSMUST00000074671	4.60726	0.00183618	0.178877	up	ENSMUSG00000056978	Hamp2	Hepcidin-2 [Source:UniProtKB/Swiss-Prot;Acc:Q80T19]
14163	ENSMUST00000124882	4.59888	0.0098144	0.388648	up	ENSMUSG00000025265	Fgd1	FYVE, RhoGEF and PH domain-containing protein 1 [Source:UniProtKB/Swiss-Prot;Acc:P52734]
654812	ENSMUST00000030840	4.58184	0.0117158	0.419288	up	ENSMUSG00000028989	Angptl7	Angiopoietin-related protein 7 [Source:UniProtKB/Swiss-Prot;Acc:Q8R1Q3]
15469	ENSMUST00000207735	4.58078	0.000114511	0.0420886	up	ENSMUSG00000109324	Prmt1	protein arginine N-methyltransferase 1 [Source:MGI Symbol;Acc:MGI:107846]
77264	ENSMUST00000027315	4.57757	0.0467332	0.604758	up	ENSMUSG00000026135	Zfp142	zinc finger protein 142 [Source:MGI Symbol;Acc:MGI:1924514]
56419	ENSMUST00000227666	4.57634	0.00526109	0.296431	up	ENSMUSG00000022021	Diaph3	diaphanous related formin 3
218850	ENSMUST00000022450	4.574	0.0401941	0.599863	up	ENSMUSG00000040651	Fam208a	family with sequence similarity 208, member A
108961	ENSMUST00000151139	4.5644	0.00852598	0.367554	up	ENSMUSG00000046179	E2f8	Transcription factor E2F8 [Source:UniProtKB/Swiss-Prot;Acc:Q58FA4]
16832	ENSMUST00000032373	4.56127	0.0348236	0.579272	up	ENSMUSG00000030246	Ldhb	L-lactate dehydrogenase B chain [Source:UniProtKB/Swiss-Prot;Acc:P16125]
15500	ENSMUST00000079833	4.55758	0.0303508	0.56132	up	ENSMUSG00000019878	Hsf2	heat shock factor 2
320452	ENSMUST00000057023	4.55437	1.65737e-05	0.0129789	up	ENSMUSG00000051048	P4ha3	prolyl 4-hydroxylase subunit alpha 3 [Source:HGNC Symbol;Acc:HGNC:30135]
14276	ENSMUST00000094141	4.55312	0.0247303	0.529126	up	ENSMUSG00000032725	Folr2	Folate receptor beta [Source:UniProtKB/Swiss-Prot;Acc:Q05685]
237221	ENSMUST00000152248	4.55116	0.0223802	0.513119	up	ENSMUSG00000040621	Gemin8	Gem-associated protein 8 [Source:UniProtKB/Swiss-Prot;Acc:Q8BHE1]
68616	ENSMUST00000207004	4.54387	0.0251747	0.531396	up	ENSMUSG00000030703	Gdpd3	Lysophospholipase D GDPD3 [Source:UniProtKB/Swiss-Prot;Acc:Q99LY2]
12388	ENSMUST00000111692	4.53817	0.000106096	0.0403143	up	ENSMUSG00000034101	Ctnnd1	Mus musculus catenin (cadherin associated protein), delta 1 (Ctnnd1), transcript variant 7, mRNA. [Source:RefSeq mRNA;Acc:NM_001355065]
78733	ENSMUST00000230054	4.53376	0.000236481	0.0647212	up	ENSMUSG00000032783	Troap	trophinin associated protein
78733	ENSMUST00000229224	4.52925	0.0119496	0.420851	up	ENSMUSG00000032783	Troap	trophinin associated protein
74760	ENSMUST00000144788	4.51716	0.0147301	0.448762	up	ENSMUSG00000024663	Rab3il1	Mus musculus RAB3A interacting protein (rabin3)-like 1 (Rab3il1), transcript variant 2, mRNA. [Source:RefSeq mRNA;Acc:NM_001347429]
72578	ENSMUST00000137459	4.51169	0.0380556	0.593408	up	ENSMUSG00000038347	Tcte2	RIKEN cDNA 2700054A10 gene
19246	ENSMUST00000144249	4.50715	0.0478098	0.604758	up	ENSMUSG00000027540	Ptpn1	protein tyrosine phosphatase, non-receptor type 1 [Source:MGI Symbol;Acc:MGI:97805]
692154	ENSMUST00000103336	4.50596	0.000568223	0.103141	up	ENSMUSG00000076535	Igkv1-88	immunoglobulin kappa chain variable 1-88
67666	ENSMUST00000206092	4.50594	0.0157441	0.45805	up	ENSMUSG00000030606	Hapln3	Hyaluronan and proteoglycan link protein 3 [Source:UniProtKB/Swiss-Prot;Acc:Q80WM5]
269593	ENSMUST00000001116	4.50112	0.0401792	0.599752	up	ENSMUSG00000001089	Luzp1	Leucine zipper protein 1 [Source:UniProtKB/Swiss-Prot;Acc:Q8R4U7]
276950	ENSMUST00000038141	4.49383	0.000910196	0.128229	up	ENSMUSG00000035208	Slfn8	schlafen 8 [Source:MGI Symbol;Acc:MGI:2672859]
224090	ENSMUST00000140402	4.48654	0.0292462	0.553402	up	ENSMUSG00000022537	Tmem44	Mus musculus transmembrane protein 44 (Tmem44), transcript variant 3, mRNA. [Source:RefSeq mRNA;Acc:NM_001357413]
80986	ENSMUST00000046916	4.48487	0.035771	0.58285	up	ENSMUSG00000037725	Ckap2	Cytoskeleton-associated protein 2 [Source:UniProtKB/Swiss-Prot;Acc:Q3V1H1]
17059	ENSMUST00000174404	4.48353	0.0141228	0.441922	up	ENSMUSG00000030325	Klrb1c	killer cell lectin-like receptor subfamily B member 1C
17228	ENSMUST00000022834	4.48299	0.0223721	0.513119	up	ENSMUSG00000022225	Cma1	chymase 1, mast cell
59024	ENSMUST00000137664	4.47967	0.0003323	0.0769882	up	ENSMUSG00000079487	Med12	Mediator of RNA polymerase II transcription subunit 12 [Source:UniProtKB/Swiss-Prot;Acc:A2AGH6]
67302	ENSMUST00000022577	4.47046	0.0417177	0.604349	up	ENSMUSG00000022000	Zc3h13	zinc finger CCCH type containing 13
83486	ENSMUST00000182022	4.46797	0.0180672	0.478977	up	ENSMUSG00000032580	Rbm5	RNA-binding protein 5 [Source:UniProtKB/Swiss-Prot;Acc:Q91YE7]
210297	ENSMUST00000137665	4.46719	0.0154973	0.456108	up	ENSMUSG00000031290	Lrch2	Leucine-rich repeat and calponin homology domain-containing protein 2 [Source:UniProtKB/Swiss-Prot;Acc:Q3UMG5]
20303	ENSMUST00000019074	4.45817	0.0168632	0.467688	up	ENSMUSG00000018930	Ccl4	C-C motif chemokine 4 [Source:UniProtKB/Swiss-Prot;Acc:P14097]
224171	ENSMUST00000130080	4.4132	0.00211515	0.192329	up	ENSMUSG00000033031	C330027C09Rik	Protein CIP2A [Source:UniProtKB/Swiss-Prot;Acc:Q8BWY9]
71544	ENSMUST00000215397	4.40565	0.000243054	0.0651333	up	ENSMUSG00000050730	Arhgap42	Rho GTPase activating protein 42 [Source:MGI Symbol;Acc:MGI:1918794]
66570	ENSMUST00000089157	4.40549	0.00888593	0.374962	up	ENSMUSG00000068101	Cenpm	centromere protein M
74388	ENSMUST00000034960	4.38384	0.0391281	0.595341	up	ENSMUSG00000032393	Dpp8	Dipeptidyl peptidase 8 [Source:UniProtKB/Swiss-Prot;Acc:Q80YA7]
242202	ENSMUST00000066728	4.37854	0.0194925	0.490435	up	ENSMUSG00000053965	Pde5a	cGMP-specific 3',5'-cyclic phosphodiesterase [Source:UniProtKB/Swiss-Prot;Acc:Q8CG03]
380753	ENSMUST00000077456	4.35969	0.0463208	0.604758	up	ENSMUSG00000020564	Atxn7l1	Ataxin-7-like protein 1 [Source:UniProtKB/Swiss-Prot;Acc:Q9CZ05]
268977	ENSMUST00000001927	4.34181	0.0403608	0.599947	up	ENSMUSG00000001870	Ltbp1	Latent-transforming growth factor beta-binding protein 1 [Source:UniProtKB/Swiss-Prot;Acc:Q8CG19]
57267	ENSMUST00000219304	4.33952	0.045493	0.604758	up	ENSMUSG00000004931	Apba3	amyloid beta (A4) precursor protein-binding, family A, member 3
269774	ENSMUST00000204613	4.3375	0.0386245	0.594262	up	ENSMUSG00000057230	Aak1	AP2 associated kinase 1 [Source:MGI Symbol;Acc:MGI:1098687]
677858	ENSMUST00000103384	4.33599	0.0110756	0.410493	up	ENSMUSG00000076583	Igkv8-24	immunoglobulin kappa chain variable 8-24
12850	ENSMUST00000098090	4.33596	0.0156512	0.457122	up	ENSMUSG00000030652	Coq7	5-demethoxyubiquinone hydroxylase, mitochondrial [Source:UniProtKB/Swiss-Prot;Acc:P97478]
109212	ENSMUST00000021164	4.32615	0.000189368	0.057901	up	ENSMUSG00000020808	Pimreg	Protein PIMREG [Source:UniProtKB/Swiss-Prot;Acc:Q8BFY7]
243420	ENSMUST00000103303	4.31878	0.0235798	0.522134	up	ENSMUSG00000096336	Igkv1-135	immunoglobulin kappa variable 1-135
209737	ENSMUST00000213945	4.31217	0.00654379	0.329546	up	ENSMUSG00000036768	Kif15	Kinesin-like protein KIF15 [Source:UniProtKB/Swiss-Prot;Acc:Q6P9L6]
12190	ENSMUST00000202693	4.31105	0.012589	0.427668	up	ENSMUSG00000041147	Brca2	Breast cancer type 2 susceptibility protein homolog [Source:UniProtKB/Swiss-Prot;Acc:P97929]
76889	ENSMUST00000108378	4.30642	0.0386271	0.594262	up	ENSMUSG00000003762	Coq8b	coenzyme Q8B [Source:HGNC Symbol;Acc:HGNC:19041]
17896	ENSMUST00000123074	4.30566	0.0202912	0.495645	up	ENSMUSG00000061086	Myl4	Mus musculus myosin, light polypeptide 4 (Myl4), transcript variant 2, mRNA. [Source:RefSeq mRNA;Acc:NM_001355755]
76832	ENSMUST00000132547	4.29813	0.0416861	0.604297	up	ENSMUSG00000050555	Hyls1	HYLS1, centriolar and ciliogenesis associated [Source:HGNC Symbol;Acc:HGNC:26558]
18974	ENSMUST00000221986	4.29754	0.0130718	0.432463	up	ENSMUSG00000020974	Pole2	polymerase (DNA directed), epsilon 2 (p59 subunit)
13132	ENSMUST00000080880	4.29641	0.0340615	0.575541	up	ENSMUSG00000022150	Dab2	DAB2, clathrin adaptor protein [Source:HGNC Symbol;Acc:HGNC:2662]
72831	ENSMUST00000165596	4.27732	0.0118198	0.420032	up	ENSMUSG00000032480	Dhx30	Putative ATP-dependent RNA helicase DHX30 [Source:UniProtKB/Swiss-Prot;Acc:Q99PU8]
71988	ENSMUST00000136920	4.2661	0.00055307	0.101446	up	ENSMUSG00000022034	Esco2	N-acetyltransferase ESCO2 [Source:UniProtKB/Swiss-Prot;Acc:Q8CIB9]
17308	ENSMUST00000155806	4.26156	0.0486852	0.604758	up	ENSMUSG00000020346	Mgat1	Alpha-1,3-mannosyl-glycoprotein 2-beta-N-acetylglucosaminyltransferase [Source:UniProtKB/Swiss-Prot;Acc:P27808]
20382	ENSMUST00000176834	4.24807	0.0491656	0.604758	up	ENSMUSG00000034120	Srsf2	Serine/arginine-rich splicing factor 2 [Source:UniProtKB/Swiss-Prot;Acc:Q62093]
319944	ENSMUST00000041733	4.2359	0.00948116	0.383	up	ENSMUSG00000037343	Taf2	TATA-box binding protein associated factor 2
12189	ENSMUST00000156843	4.2323	0.0119876	0.421106	up	ENSMUSG00000017146	Brca1	Breast cancer type 1 susceptibility protein homolog [Source:UniProtKB/Swiss-Prot;Acc:P48754]
12816	ENSMUST00000135009	4.23143	0.0359051	0.583512	up	ENSMUSG00000032332	Col12a1	Collagen alpha-1(XII) chain [Source:UniProtKB/Swiss-Prot;Acc:Q60847]
21946	ENSMUST00000032573	4.21421	0.0444988	0.604758	up	ENSMUSG00000030413	Pglyrp1	Peptidoglycan recognition protein 1 [Source:UniProtKB/Swiss-Prot;Acc:O88593]
109212	ENSMUST00000133880	4.18439	0.00992436	0.391467	up	ENSMUSG00000020808	Pimreg	Protein PIMREG [Source:UniProtKB/Swiss-Prot;Acc:Q8BFY7]
245305	ENSMUST00000122450	4.18021	0.0475645	0.604758	up	ENSMUSG00000080717	B230307C23Rik	RIKEN cDNA B230307C23 gene [Source:MGI Symbol;Acc:MGI:3643396]
667683	ENSMUST00000103354	4.16812	0.0068719	0.338411	up	ENSMUSG00000094006	Igkv4-59	immunoglobulin kappa variable 4-59
76199	ENSMUST00000201010	4.15215	0.0442094	0.604758	up	ENSMUSG00000018076	Med13l	mediator of RNA polymerase II transcription subunit 13-like isoform 1 [Source:RefSeq peptide;Acc:NP_001334374]
71421	ENSMUST00000073363	4.14715	0.0182826	0.481046	up	ENSMUSG00000029282	Amtn	Amelotin [Source:UniProtKB/Swiss-Prot;Acc:Q9D3J8]
60411	ENSMUST00000022227	4.12385	0.0263916	0.539236	up	ENSMUSG00000021714	Cenpk	centromere protein K
75788	ENSMUST00000126822	4.11951	0.0240268	0.524797	up	ENSMUSG00000038780	Smurf1	E3 ubiquitin-protein ligase SMURF1 [Source:UniProtKB/Swiss-Prot;Acc:Q9CUN6]
75847	ENSMUST00000223068	4.11482	0.0330355	0.571539	up	ENSMUSG00000043153	Ispd	isoprenoid synthase domain containing
14710	ENSMUST00000036088	4.11085	0.0371487	0.589233	up	ENSMUSG00000038811	Gngt2	guanine nucleotide binding protein (G protein), gamma transducing activity polypeptide 2 [Source:MGI Symbol;Acc:MGI:893584]
18022	ENSMUST00000154510	4.10247	0.0302992	0.561139	up	ENSMUSG00000058794	Nfe2	nuclear factor, erythroid 2 [Source:HGNC Symbol;Acc:HGNC:7780]
71910	ENSMUST00000139120	4.09827	4.38031e-06	0.0063594	up	ENSMUSG00000031570	Plpp5	Phospholipid phosphatase 5 [Source:UniProtKB/Swiss-Prot;Acc:Q3UMZ3]
22171	ENSMUST00000026846	4.08648	0.00115884	0.144844	up	ENSMUSG00000025747	Tyms	thymidylate synthase [Source:MGI Symbol;Acc:MGI:98878]
13480	ENSMUST00000153258	4.07733	0.0315976	0.567101	up	ENSMUSG00000078919	Dpm1	Dolichol-phosphate mannosyltransferase subunit 1 [Source:UniProtKB/Swiss-Prot;Acc:O70152]
72692	ENSMUST00000184635	4.06875	0.000254345	0.0660416	up	ENSMUSG00000024095	Hnrnpll	Heteroous nuclear ribonucleoprotein L-like [Source:UniProtKB/Swiss-Prot;Acc:Q921F4]
56812	ENSMUST00000082158	4.06744	0.00424482	0.271381	up	ENSMUSG00000026203	Dnajb2	DnaJ homolog subfamily B member 2 [Source:UniProtKB/Swiss-Prot;Acc:Q9QYI5]
195046	ENSMUST00000048514	4.06121	0.0343596	0.577025	up	ENSMUSG00000069830	Nlrp1a	NACHT, LRR and PYD domains-containing protein 1a [Source:UniProtKB/Swiss-Prot;Acc:Q2LKU9]
232065	ENSMUST00000103389	4.05746	0.00170417	0.173857	up	ENSMUSG00000096594	Igkv8-19	immunoglobulin kappa variable 8-19
69169	ENSMUST00000126821	4.04669	0.0317915	0.567662	up	ENSMUSG00000042474	Fcmr	Fc fragment of IgM receptor [Source:HGNC Symbol;Acc:HGNC:14315]
24086	ENSMUST00000106939	4.04644	0.0248173	0.529522	up	ENSMUSG00000020694	Tlk2	Serine/threonine-protein kinase tousled-like 2 [Source:UniProtKB/Swiss-Prot;Acc:O55047]
12521	ENSMUST00000150508	4.04222	0.0379893	0.592953	up	ENSMUSG00000027215	Cd82	CD82 antigen [Source:UniProtKB/Swiss-Prot;Acc:P40237]
54141	ENSMUST00000141026	4.04191	0.0182478	0.480993	up	ENSMUSG00000002055	Spag5	Sperm-associated antigen 5 [Source:UniProtKB/Swiss-Prot;Acc:Q7TME2]
67629	ENSMUST00000098942	4.03398	0.0427796	0.604758	up	ENSMUSG00000074476	Spc24	Kinetochore protein Spc24 [Source:UniProtKB/Swiss-Prot;Acc:Q9D083]
101543	ENSMUST00000205914	4.01981	0.0223258	0.512897	up	ENSMUSG00000036459	Wtip	WT1-interacting protein [Source:MGI Symbol;Acc:MGI:2141920]
19224	ENSMUST00000133777	4.01277	0.0387013	0.594487	up	ENSMUSG00000047250	Ptgs1	prostaglandin-endoperoxide synthase 1 [Source:MGI Symbol;Acc:MGI:97797]
21417	ENSMUST00000160522	3.99147	0.0202469	0.495357	up	ENSMUSG00000024238	Zeb1	zinc finger E-box binding homeobox 1 [Source:MGI Symbol;Acc:MGI:1344313]
109331	ENSMUST00000138490	3.98764	0.00986392	0.389858	up	ENSMUSG00000028309	Rnf20	ring finger protein 20 [Source:MGI Symbol;Acc:MGI:1925927]
71711	ENSMUST00000025841	3.97734	0.0494707	0.604758	up	ENSMUSG00000024906	Mus81	Crossover junction endonuclease MUS81 [Source:UniProtKB/Swiss-Prot;Acc:Q91ZJ0]
67302	ENSMUST00000227049	3.97229	0.000167931	0.0541504	up	ENSMUSG00000022000	Zc3h13	zinc finger CCCH type containing 13
69046	ENSMUST00000160628	3.95564	0.000238297	0.0649674	up	ENSMUSG00000044792	Isca1	Iron-sulfur cluster assembly 1 homolog, mitochondrial [Source:UniProtKB/Swiss-Prot;Acc:Q9D924]
66317	ENSMUST00000051822	3.95549	0.00611091	0.31834	up	ENSMUSG00000061559	Wdr61	WD repeat domain 61 [Source:MGI Symbol;Acc:MGI:1917493]
63959	ENSMUST00000167195	3.95391	0.0454165	0.604758	up	ENSMUSG00000023942	Slc29a1	solute carrier family 29 (nucleoside transporters), member 1 [Source:MGI Symbol;Acc:MGI:1927073]
238447	ENSMUST00000178282	3.95022	0.000777863	0.123035	up	ENSMUSG00000095079	Igha	immunoglobulin heavy constant alpha
21877	ENSMUST00000141939	3.94822	0.045221	0.604758	up	ENSMUSG00000025574	Tk1	thymidine kinase 1 [Source:MGI Symbol;Acc:MGI:98763]
233406	ENSMUST00000174111	3.94705	0.00964528	0.386201	up	ENSMUSG00000038943	Prc1	protein regulator of cytokinesis 1 [Source:MGI Symbol;Acc:MGI:1858961]
226654	ENSMUST00000194029	3.94521	0.0292306	0.553402	up	ENSMUSG00000103711	Tstd1	thiosulfate sulfurtransferase like domain containing 1 [Source:HGNC Symbol;Acc:HGNC:35410]
20878	ENSMUST00000109140	3.94492	0.0248355	0.529559	up	ENSMUSG00000027496	Aurka	Aurora kinase A [Source:UniProtKB/Swiss-Prot;Acc:P97477]
75725	ENSMUST00000133776	3.91553	0.000596311	0.106725	up	ENSMUSG00000029629	Phf14	PHD finger protein 14 [Source:MGI Symbol;Acc:MGI:1923539]
79362	ENSMUST00000111703	3.91058	0.02313	0.51943	up	ENSMUSG00000030256	Bhlhe41	Class E basic helix-loop-helix protein 41 [Source:UniProtKB/Swiss-Prot;Acc:Q99PV5]
77739	ENSMUST00000048885	3.91033	0.00925316	0.378869	up	ENSMUSG00000066113	Adamtsl1	ADAMTS-like protein 1 [Source:UniProtKB/Swiss-Prot;Acc:Q8BLI0]
108000	ENSMUST00000171929	3.89089	3.44254e-05	0.0196092	up	ENSMUSG00000026605	Cenpf	centromere protein F [Source:MGI Symbol;Acc:MGI:1313302]
71684	ENSMUST00000102767	3.88502	0.000203001	0.0590953	up	ENSMUSG00000036249	Rbm43	Mus musculus RNA binding motif protein 43 (Rbm43), transcript variant 5, mRNA. [Source:RefSeq mRNA;Acc:NM_001355606]
667742	ENSMUST00000047480	3.87384	0.0134827	0.437853	up	ENSMUSG00000041482	Piezo2	Piezo-type mechanosensitive ion channel component 2 [Source:UniProtKB/Swiss-Prot;Acc:Q8CD54]
15040	ENSMUST00000174839	3.8613	0.0495518	0.604758	up	ENSMUSG00000067212	H2-T23	H-2 class I histocompatibility antigen, D-37 alpha chain [Source:UniProtKB/Swiss-Prot;Acc:P06339]
233826	ENSMUST00000098068	3.85919	0.0471065	0.604758	up	ENSMUSG00000044702	Palb2	Partner and localizer of BRCA2 [Source:UniProtKB/Swiss-Prot;Acc:Q3U0P1]
384515	ENSMUST00000103350	3.85187	0.0202747	0.495468	up	ENSMUSG00000076549	Igkv4-68	immunoglobulin kappa variable 4-68
15366	ENSMUST00000020579	3.84701	0.000109983	0.041125	up	ENSMUSG00000020330	Hmmr	Hyaluronan mediated motility receptor [Source:UniProtKB/Swiss-Prot;Acc:Q00547]
60411	ENSMUST00000225939	3.83804	0.00938984	0.38114	up	ENSMUSG00000021714	Cenpk	centromere protein K
20307	ENSMUST00000009329	3.8368	0.0364087	0.58622	up	ENSMUSG00000009185	Ccl8	C-C motif chemokine 8 [Source:UniProtKB/Swiss-Prot;Acc:Q9Z121]
67241	ENSMUST00000218319	3.82839	0.000222619	0.0622483	up	ENSMUSG00000020608	Smc6	structural maintenance of chromosomes 6
57370	ENSMUST00000129985	3.80769	0.0478353	0.604758	up	ENSMUSG00000052423	B4galt3	Beta-1,4-galactosyltransferase 3 N-acetyllactosamine synthase Beta-N-acetylglucosaminylglycopeptide beta-1,4-galactosyltransferase Beta-N-acetylglucosaminyl-glycolipid beta-1,4-galactosyltransferase [Source:UniProtKB/Swiss-Prot;Acc:Q91YY2]
110651	ENSMUST00000142668	3.80551	0.0277035	0.54529	up	ENSMUSG00000031309	Rps6ka3	ribosomal protein S6 kinase polypeptide 3 [Source:MGI Symbol;Acc:MGI:104557]
13528	ENSMUST00000173199	3.80139	0.0193649	0.489311	up	ENSMUSG00000071454	Dtnb	Dystrobrevin beta [Source:UniProtKB/Swiss-Prot;Acc:O70585]
16443	ENSMUST00000124094	3.79658	0.0247437	0.52913	up	ENSMUSG00000022957	Itsn1	Intersectin-1 [Source:UniProtKB/Swiss-Prot;Acc:Q9Z0R4]
66570	ENSMUST00000230408	3.79392	0.00898807	0.375953	up	ENSMUSG00000068101	Cenpm	centromere protein M
17248	ENSMUST00000191212	3.78985	0.000950674	0.130116	up	ENSMUSG00000054387	Mdm4	transformed mouse 3T3 cell double minute 4 [Source:MGI Symbol;Acc:MGI:107934]
780931	ENSMUST00000103523	3.7764	0.00722354	0.346545	up	ENSMUSG00000093894	Ighv1-53	immunoglobulin heavy variable 1-53
110075	ENSMUST00000197143	3.77104	0.014477	0.446357	up	ENSMUSG00000029335	Bmp3	Bone morphotic protein 3 [Source:UniProtKB/Swiss-Prot;Acc:Q8BHE5]
170743	ENSMUST00000149507	3.76913	0.00317629	0.23325	up	ENSMUSG00000044583	Tlr7	toll-like receptor 7 [Source:MGI Symbol;Acc:MGI:2176882]
104271	ENSMUST00000124496	3.74254	0.0205299	0.4979	up	ENSMUSG00000009628	Tex15	Testis-expressed protein 15 [Source:UniProtKB/Swiss-Prot;Acc:F8VPN2]
67671	ENSMUST00000077915	3.73844	0.0338873	0.574736	up	ENSMUSG00000057322	Rpl38	ribosomal protein L38 [Source:MGI Symbol;Acc:MGI:1914921]
54392	ENSMUST00000134090	3.73784	0.000172563	0.0552724	up	ENSMUSG00000015880	Ncapg	non-SMC condensin I complex subunit G [Source:HGNC Symbol;Acc:HGNC:24304]
208628	ENSMUST00000031366	3.7338	0.000830354	0.124951	up	ENSMUSG00000029414	Kntc1	Kinetochore-associated protein 1 [Source:UniProtKB/Swiss-Prot;Acc:Q8C3Y4]
70315	ENSMUST00000087916	3.72006	0.0491372	0.604758	up	ENSMUSG00000067567	Hdac8	Histone deacetylase 8 [Source:UniProtKB/Swiss-Prot;Acc:Q8VH37]
20619	ENSMUST00000142278	3.71738	0.00847453	0.367382	up	ENSMUSG00000027287	Snap23	synaptosomal-associated protein 23 [Source:MGI Symbol;Acc:MGI:109356]
80719	ENSMUST00000047194	3.71667	2.70009e-05	0.0170822	up	ENSMUSG00000035004	Igsf6	Immunoglobulin superfamily member 6 [Source:UniProtKB/Swiss-Prot;Acc:P0C6B7]
667914	ENSMUST00000103396	3.71197	0.0447085	0.604758	up	ENSMUSG00000094117	Igkv3-12	immunoglobulin kappa variable 3-12
217653	ENSMUST00000149986	3.71167	0.0152654	0.453451	up	ENSMUSG00000047534	Mis18bp1	Mis18-binding protein 1 [Source:UniProtKB/Swiss-Prot;Acc:Q80WQ8]
241612	ENSMUST00000127822	3.7077	0.0228746	0.517864	up	ENSMUSG00000041644	Slc5a12	solute carrier family 5 (sodium/glucose cotransporter), member 12 [Source:MGI Symbol;Acc:MGI:2138890]
227612	ENSMUST00000137920	3.70232	0.0433008	0.604758	up	ENSMUSG00000059555	Tor4a	Torsin-4A [Source:UniProtKB/Swiss-Prot;Acc:Q8BH02]
17973	ENSMUST00000112874	3.70013	0.0209836	0.502412	up	ENSMUSG00000032475	Nck1	Cytoplasmic protein NCK1 [Source:UniProtKB/Swiss-Prot;Acc:Q99M51]
319701	ENSMUST00000061327	3.69536	0.0474758	0.604758	up	ENSMUSG00000044966	Fbxo48	F-box only protein 48 [Source:UniProtKB/Swiss-Prot;Acc:Q8CAT8]
79565	ENSMUST00000136246	3.69218	0.000521022	0.0975257	up	ENSMUSG00000040557	Mettl27	methyltransferase like 27 [Source:MGI Symbol;Acc:MGI:1933146]
229707	ENSMUST00000196416	3.69212	0.000581245	0.104969	up	ENSMUSG00000014601	Strip1	Striatin-interacting protein 1 [Source:UniProtKB/Swiss-Prot;Acc:Q8C079]
78826	ENSMUST00000053375	3.6887	0.0245948	0.528596	up	ENSMUSG00000050921	P2ry10	Mus musculus purinergic receptor P2Y, G-protein coupled 10 (P2ry10), transcript variant 2, mRNA. [Source:RefSeq mRNA;Acc:NM_001357810]
234683	ENSMUST00000212046	3.68618	0.000243895	0.0651727	up	ENSMUSG00000014791	Elmo3	Engulfment and cell motility protein 3 [Source:UniProtKB/Swiss-Prot;Acc:Q8BYZ7]
434036	ENSMUST00000114212	3.68597	0.0316334	0.56726	up	ENSMUSG00000079543	Igkv13-85	immunoglobulin kappa chain variable 13-85
68523	ENSMUST00000164884	3.67773	0.0453554	0.604758	up	ENSMUSG00000031879	Fam96b	Mitotic spindle-associated MMXD complex subunit MIP18 [Source:UniProtKB/Swiss-Prot;Acc:Q9D187]
22137	ENSMUST00000070326	3.6561	0.00139654	0.161849	up	ENSMUSG00000038379	Ttk	Ttk protein kinase [Source:MGI Symbol;Acc:MGI:1194921]
326623	ENSMUST00000062246	3.63874	0.0109541	0.408804	up	ENSMUSG00000050395	Tnfsf15	tumor necrosis factor (ligand) superfamily, member 15 [Source:MGI Symbol;Acc:MGI:2180140]
15201	ENSMUST00000025965	3.63582	0.0247292	0.529126	up	ENSMUSG00000025001	Hells	Lymphocyte-specific helicase [Source:UniProtKB/Swiss-Prot;Acc:Q60848]
54392	ENSMUST00000134309	3.63002	0.00323586	0.235701	up	ENSMUSG00000015880	Ncapg	non-SMC condensin I complex subunit G [Source:HGNC Symbol;Acc:HGNC:24304]
15388	ENSMUST00000174548	3.61825	0.0214191	0.506033	up	ENSMUSG00000015165	Hnrnpl	Heteroous nuclear ribonucleoprotein L [Source:UniProtKB/Swiss-Prot;Acc:Q8R081]
230899	ENSMUST00000103230	3.60797	0.0381499	0.593408	up	ENSMUSG00000041616	Nppa	natriuretic peptide type A [Source:MGI Symbol;Acc:MGI:97367]
269702	ENSMUST00000143476	3.60749	0.00361098	0.25129	up	ENSMUSG00000038126	Mphosph9	M-phase phosphoprotein 9 [Source:HGNC Symbol;Acc:HGNC:7215]
18476	ENSMUST00000140093	3.60632	8.1942e-05	0.0338825	up	ENSMUSG00000005447	Pafah1b3	Platelet-activating factor acetylhydrolase IB subunit gamma [Source:UniProtKB/Swiss-Prot;Acc:Q61205]
105837	ENSMUST00000171146	3.59222	0.00110391	0.140457	up	ENSMUSG00000022369	Mtbp	Mdm2-binding protein [Source:UniProtKB/Swiss-Prot;Acc:Q8BJS8]
110147	ENSMUST00000124846	3.58837	0.00663356	0.332057	up	ENSMUSG00000013787	Ehmt2	Histone-lysine N-methyltransferase EHMT2 [Source:UniProtKB/Swiss-Prot;Acc:Q9Z148]
320487	ENSMUST00000220369	3.58672	0.0184013	0.482413	up	ENSMUSG00000035181	Heatr5a	HEAT repeat containing 5A
17978	ENSMUST00000147927	3.57834	0.0185668	0.483965	up	ENSMUSG00000005886	Ncoa2	Nuclear receptor coactivator 2 [Source:UniProtKB/Swiss-Prot;Acc:Q61026]
57442	ENSMUST00000170954	3.57641	0.000684323	0.115171	up	ENSMUSG00000035165	Kcne3	Potassium voltage-gated channel subfamily E member 3 [Source:UniProtKB/Swiss-Prot;Acc:Q9WTW2]
108829	ENSMUST00000174062	3.57157	0.01333	0.435915	up	ENSMUSG00000037876	Jmjd1c	Probable JmjC domain-containing histone demethylation protein 2C [Source:UniProtKB/Swiss-Prot;Acc:Q69ZK6]
26934	ENSMUST00000165745	3.55426	0.000349104	0.0788445	up	ENSMUSG00000023015	Racgap1	Rac GTPase-activating protein 1 [Source:MGI Symbol;Acc:MGI:1349423]
70472	ENSMUST00000038194	3.54217	0.00129379	0.153892	up	ENSMUSG00000022360	Atad2	ATPase family, AAA domain containing 2
381782	ENSMUST00000103363	3.51219	0.0364829	0.586309	up	ENSMUSG00000076562	Igkv4-50	immunoglobulin kappa variable 4-50
320727	ENSMUST00000145960	3.49748	0.0428746	0.604758	up	ENSMUSG00000040029	Ipo8	Importin-8 [Source:UniProtKB/Swiss-Prot;Acc:Q7TMY7]
17345	ENSMUST00000033310	3.48928	1.27591e-05	0.0110743	up	ENSMUSG00000031004	Mki67	Proliferation marker protein Ki-67 [Source:UniProtKB/Swiss-Prot;Acc:E9PVX6]
68198	ENSMUST00000119379	3.45676	0.039184	0.59543	up	ENSMUSG00000002416	Ndufb2	NADH dehydrogenase [ubiquinone] 1 beta subcomplex subunit 2, mitochondrial [Source:UniProtKB/Swiss-Prot;Acc:Q9CPU2]
233406	ENSMUST00000172911	3.45443	0.000251466	0.0660416	up	ENSMUSG00000038943	Prc1	protein regulator of cytokinesis 1 [Source:MGI Symbol;Acc:MGI:1858961]
108912	ENSMUST00000155312	3.44544	0.00514489	0.2955	up	ENSMUSG00000048922	Cdca2	Cell division cycle-associated protein 2 [Source:UniProtKB/Swiss-Prot;Acc:Q14B71]
21853	ENSMUST00000145710	3.44541	0.00932373	0.380447	up	ENSMUSG00000039994	Timeless	timeless circadian regulator [Source:HGNC Symbol;Acc:HGNC:11813]
233406	ENSMUST00000174172	3.43601	2.42502e-05	0.0160259	up	ENSMUSG00000038943	Prc1	protein regulator of cytokinesis 1 [Source:MGI Symbol;Acc:MGI:1858961]
17121	ENSMUST00000021941	3.43558	0.00384763	0.260208	up	ENSMUSG00000021485	Mxd3	Max dimerization protein 3 [Source:UniProtKB/Swiss-Prot;Acc:Q80US8]
23871	ENSMUST00000034534	3.43428	0.0276167	0.54483	up	ENSMUSG00000032035	Ets1	Protein C-ets-1 [Source:UniProtKB/Swiss-Prot;Acc:P27577]
77090	ENSMUST00000002469	3.43078	0.00157908	0.171941	up	ENSMUSG00000002396	Ocel1	occludin/ELL domain containing 1 [Source:MGI Symbol;Acc:MGI:1924340]
19262	ENSMUST00000230640	3.42758	0.0296122	0.557167	up	ENSMUSG00000027303	Ptpra	protein tyrosine phosphatase, receptor type, A [Source:MGI Symbol;Acc:MGI:97808]
13605	ENSMUST00000108296	3.41556	0.000632307	0.110891	up	ENSMUSG00000027699	Ect2	Protein ECT2 [Source:UniProtKB/Swiss-Prot;Acc:Q07139]
380753	ENSMUST00000133549	3.41393	0.0194133	0.489828	up	ENSMUSG00000020564	Atxn7l1	Ataxin-7-like protein 1 [Source:UniProtKB/Swiss-Prot;Acc:Q9CZ05]
17536	ENSMUST00000110908	3.41164	0.0118847	0.420851	up	ENSMUSG00000027210	Meis2	Homeobox protein Meis2 [Source:UniProtKB/Swiss-Prot;Acc:P97367]
64384	ENSMUST00000211179	3.39446	0.00815101	0.362274	up	ENSMUSG00000025486	Sirt3	sirtuin 3 [Source:MGI Symbol;Acc:MGI:1927665]
71876	ENSMUST00000211217	3.38459	0.00206339	0.189872	up	ENSMUSG00000031629	Cenpu	Centromere protein U [Source:UniProtKB/Swiss-Prot;Acc:Q8C4M7]
16186	ENSMUST00000127538	3.38192	0.0347854	0.57904	up	ENSMUSG00000031304	Il2rg	Cytokine receptor common subunit gamma [Source:UniProtKB/Swiss-Prot;Acc:P34902]
13006	ENSMUST00000157053	3.37592	0.00297071	0.225371	up	ENSMUSG00000024974	Smc3	Structural maintenance of chromosomes protein 3 [Source:UniProtKB/Swiss-Prot;Acc:Q9CW03]
110385	ENSMUST00000110095	3.37558	0.00422384	0.270762	up	ENSMUSG00000031842	Pde4c	cAMP-specific 3',5'-cyclic phosphodiesterase 4C [Source:UniProtKB/Swiss-Prot;Acc:Q3UEI1]
73826	ENSMUST00000058793	3.36975	0.0395566	0.597023	up	ENSMUSG00000041815	Poldip3	Mus musculus polymerase (DNA-directed), delta interacting protein 3 (Poldip3), transcript variant 2, mRNA. [Source:RefSeq mRNA;Acc:NM_001347082]
99712	ENSMUST00000141525	3.36869	0.00340227	0.241693	up	ENSMUSG00000040774	Cept1	Mus musculus choline/ethanolaminephosphotransferase 1 (Cept1), transcript variant 3, mRNA. [Source:RefSeq mRNA;Acc:NM_001357818]
234258	ENSMUST00000130656	3.35962	0.000658991	0.112989	up	ENSMUSG00000039396	Neil3	Endonuclease 8-like 3 [Source:UniProtKB/Swiss-Prot;Acc:Q8K203]
70218	ENSMUST00000021311	3.35357	0.000662121	0.113055	up	ENSMUSG00000051378	Kif18b	Kinesin-like protein KIF18B [Source:UniProtKB/Swiss-Prot;Acc:Q6PFD6]
215512	ENSMUST00000037502	3.35136	0.0441336	0.604758	up	ENSMUSG00000038893	Fam117a	Protein FAM117A [Source:UniProtKB/Swiss-Prot;Acc:Q7TNF9]
16582	ENSMUST00000212554	3.33598	0.0169614	0.468303	up	ENSMUSG00000031788	Kifc3	Kinesin-like protein KIFC3 [Source:UniProtKB/Swiss-Prot;Acc:O35231]
74251	ENSMUST00000148765	3.33027	0.0289246	0.551892	up	ENSMUSG00000037904	Ankrd9	Ankyrin repeat domain-containing protein 9 [Source:UniProtKB/Swiss-Prot;Acc:Q8BH83]
333088	ENSMUST00000101614	3.32946	0.00994585	0.391768	up	ENSMUSG00000059022	Kcp	Kielin/chordin-like protein [Source:UniProtKB/Swiss-Prot;Acc:Q3U492]
237886	ENSMUST00000138797	3.32454	7.87525e-05	0.0332622	up	ENSMUSG00000069793	Slfn9	schlafen 9
230157	ENSMUST00000030032	3.32004	0.0266379	0.540499	up	ENSMUSG00000028347	Tmeff1	Mus musculus transmembrane protein with EGF-like and two follistatin-like domains 1 (Tmeff1), transcript variant 1, mRNA. [Source:RefSeq mRNA;Acc:NM_001356272]
74243	ENSMUST00000130856	3.31962	0.00140746	0.162379	up	ENSMUSG00000027281	Slx4ip	Mus musculus SLX4 interacting protein (Slx4ip), transcript variant 6, mRNA. [Source:RefSeq mRNA;Acc:NM_001355671]
12316	ENSMUST00000053364	3.31435	4.49873e-05	0.0220187	up	ENSMUSG00000033952	Aspm	Abnormal spindle-like microcephaly-associated protein homolog [Source:UniProtKB/Swiss-Prot;Acc:Q8CJ27]
219114	ENSMUST00000022536	3.3138	0.000374643	0.0815078	up	ENSMUSG00000021965	Ska3	spindle and kinetochore associated complex subunit 3
76131	ENSMUST00000120272	3.31141	0.00162682	0.173701	up	ENSMUSG00000028175	Depdc1a	DEP domain-containing protein 1A [Source:UniProtKB/Swiss-Prot;Acc:Q8CIG0]
12395	ENSMUST00000098256	3.30748	0.0262365	0.538676	up	ENSMUSG00000006586	Runx1t1	runt-related transcription factor 1; translocated to, 1 (cyclin D-related) [Source:MGI Symbol;Acc:MGI:104793]
23871	ENSMUST00000183879	3.2964	0.04761	0.604758	up	ENSMUSG00000032035	Ets1	Protein C-ets-1 [Source:UniProtKB/Swiss-Prot;Acc:P27577]
224903	ENSMUST00000183318	3.29316	0.00646882	0.327471	up	ENSMUSG00000071054	Safb	Scaffold attachment factor B1 [Source:UniProtKB/Swiss-Prot;Acc:D3YXK2]
12532	ENSMUST00000060710	3.2677	0.000621989	0.109707	up	ENSMUSG00000044201	Cdc25c	cell division cycle 25C
692165	ENSMUST00000103328	3.26461	0.0362133	0.584652	up	ENSMUSG00000094420	Igkv10-96	immunoglobulin kappa variable 10-96
18799	ENSMUST00000214491	3.26305	0.0364642	0.586296	up	ENSMUSG00000010660	Plcd1	1-phosphatidylinositol 4,5-bisphosphate phosphodiesterase delta-1 [Source:UniProtKB/Swiss-Prot;Acc:Q8R3B1]
231532	ENSMUST00000094559	3.26146	0.0267229	0.540844	up	ENSMUSG00000057315	Arhgap24	Rho GTPase activating protein 24 [Source:MGI Symbol;Acc:MGI:1922647]
-	ENSMUST00000179760	3.24018	0.0416526	0.604297	up	ENSMUSG00000095562	Gm21887	-
12235	ENSMUST00000133943	3.24016	0.000187784	0.0577378	up	ENSMUSG00000027379	Bub1	mitotic checkpoint serine/threonine-protein kinase BUB1 isoform 2 [Source:RefSeq peptide;Acc:NP_033902]
74513	ENSMUST00000109686	3.23317	0.00587735	0.312624	up	ENSMUSG00000036902	Neto2	Mus musculus neuropilin (NRP) and tolloid (TLL)-like 2 (Neto2), transcript variant 1, mRNA. [Source:RefSeq mRNA;Acc:NM_001357287]
16568	ENSMUST00000120613	3.22982	0.0258922	0.536547	up	ENSMUSG00000018395	Kif3a	Kinesin-like protein KIF3A [Source:UniProtKB/Swiss-Prot;Acc:P28741]
57267	ENSMUST00000218146	3.22325	0.0134553	0.437521	up	ENSMUSG00000004931	Apba3	amyloid beta (A4) precursor protein-binding, family A, member 3
100561	ENSMUST00000031367	3.22025	0.00420606	0.269892	up	ENSMUSG00000029416	Slc15a4	Solute carrier family 15 member 4 [Source:UniProtKB/Swiss-Prot;Acc:Q91W98]
76843	ENSMUST00000193977	3.21696	3.48233e-05	0.0196092	up	ENSMUSG00000037474	Dtl	Denticleless protein homolog [Source:UniProtKB/Swiss-Prot;Acc:Q3TLR7]
381319	ENSMUST00000191621	3.18307	0.0283793	0.549632	up	ENSMUSG00000026630	Batf3	Basic leucine zipper transcriptional factor ATF-like 3 [Source:UniProtKB/Swiss-Prot;Acc:Q9D275]
52585	ENSMUST00000155969	3.183	0.00332728	0.239002	up	ENSMUSG00000002332	Dhrs1	Dehydrogenase/reductase SDR family member 1 [Source:UniProtKB/Swiss-Prot;Acc:Q99L04]
110033	ENSMUST00000032915	3.1766	0.00184481	0.178877	up	ENSMUSG00000030677	Kif22	Kinesin-like protein KIF22 [Source:UniProtKB/Swiss-Prot;Acc:Q3V300]
21388	ENSMUST00000202723	3.17511	0.00139696	0.161849	up	ENSMUSG00000018263	Tbx5	T-box 5 [Source:MGI Symbol;Acc:MGI:102541]
15369	ENSMUST00000004172	3.17114	0.0245278	0.528349	up	ENSMUSG00000004070	Hmox2	Mus musculus heme oxygenase 2 (Hmox2), transcript variant 3, mRNA. [Source:RefSeq mRNA;Acc:NM_001357050]
76813	ENSMUST00000139765	3.16935	0.0490282	0.604758	up	ENSMUSG00000002343	Armc6	Armadillo repeat-containing protein 6 [Source:UniProtKB/Swiss-Prot;Acc:Q8BNU0]
12534	ENSMUST00000020099	3.16368	0.000355659	0.0795305	up	ENSMUSG00000019942	Cdk1	Cyclin-dependent kinase 1 [Source:UniProtKB/Swiss-Prot;Acc:P11440]
76260	ENSMUST00000223356	3.14768	0.0497978	0.604758	up	ENSMUSG00000021013	Ttc8	tetratricopeptide repeat domain 8 [Source:MGI Symbol;Acc:MGI:1923510]
16480	ENSMUST00000155746	3.13442	0.011216	0.412764	up	ENSMUSG00000001552	Jup	Junction plakoglobin [Source:UniProtKB/Swiss-Prot;Acc:Q02257]
19288	ENSMUST00000029421	3.13406	0.0016553	0.173857	up	ENSMUSG00000027832	Ptx3	Pentraxin-related protein PTX3 [Source:UniProtKB/Swiss-Prot;Acc:P48759]
69274	ENSMUST00000073109	3.13324	0.0485155	0.604758	up	ENSMUSG00000047409	Ctdspl	CTD small phosphatase-like protein [Source:UniProtKB/Swiss-Prot;Acc:P58465]
75669	ENSMUST00000188784	3.13298	0.0413449	0.603138	up	ENSMUSG00000032571	Pik3r4	Phosphoinositide 3-kinase regulatory subunit 4 [Source:UniProtKB/Swiss-Prot;Acc:Q8VD65]
381511	ENSMUST00000108301	3.13257	0.000889446	0.127881	up	ENSMUSG00000049225	Pdp1	pyruvate dehyrogenase phosphatase catalytic subunit 1 [Source:MGI Symbol;Acc:MGI:2685870]
319173	ENSMUST00000073261	3.12714	0.0408309	0.600877	up	ENSMUSG00000061991	Hist1h2af	Histone H2A type 1-F [Source:UniProtKB/Swiss-Prot;Acc:Q8CGP5]
21973	ENSMUST00000068031	3.12614	0.00417306	0.269142	up	ENSMUSG00000020914	Top2a	DNA topoisomerase 2-alpha [Source:UniProtKB/Swiss-Prot;Acc:Q01320]
628268	ENSMUST00000103322	3.11754	0.021623	0.507752	up	ENSMUSG00000105606	Igkv2-109	immunoglobulin kappa variable 2-109
17260	ENSMUST00000196730	3.11036	0.00786385	0.358613	up	ENSMUSG00000005583	Mef2c	Mus musculus myocyte enhancer factor 2C (Mef2c), transcript variant 14, mRNA. [Source:RefSeq mRNA;Acc:NM_001347577]
106504	ENSMUST00000142923	3.10704	0.022257	0.512274	up	ENSMUSG00000024006	Stk38	Mus musculus serine/threonine kinase 38 (Stk38), transcript variant 2, mRNA. [Source:RefSeq mRNA;Acc:NM_001357173]
50530	ENSMUST00000121656	3.10046	0.0291947	0.552945	up	ENSMUSG00000030116	Mfap5	Microfibrillar-associated protein 5 [Source:UniProtKB/Swiss-Prot;Acc:Q9QZJ6]
20284	ENSMUST00000034023	3.09886	0.000259662	0.0666029	up	ENSMUSG00000031610	Scrg1	scrapie responsive gene 1 [Source:MGI Symbol;Acc:MGI:1328308]
75317	ENSMUST00000048518	3.09487	2.24896e-05	0.0155211	up	ENSMUSG00000035365	Parpbp	PARP1 binding protein [Source:HGNC Symbol;Acc:HGNC:26074]
75617	ENSMUST00000080300	3.09338	0.0201356	0.494973	up	ENSMUSG00000009927	Rps25	ribosomal protein S25 [Source:MGI Symbol;Acc:MGI:1922867]
210711	ENSMUST00000057557	3.09176	0.0473976	0.604758	up	ENSMUSG00000048170	Mcmbp	Mini-chromosome maintenance complex-binding protein [Source:UniProtKB/Swiss-Prot;Acc:Q8R3C0]
233064	ENSMUST00000132483	3.09041	0.00952509	0.384053	up	ENSMUSG00000037020	Wdr62	WD repeat domain 62 [Source:MGI Symbol;Acc:MGI:1923696]
269800	ENSMUST00000131555	3.08991	0.0363971	0.586133	up	ENSMUSG00000038346	Zfp384	zinc finger protein 384 [Source:MGI Symbol;Acc:MGI:2443203]
319168	ENSMUST00000091742	3.08406	0.0406243	0.600347	up	ENSMUSG00000069302	Hist1h2ah	Histone H2A type 1-H [Source:UniProtKB/Swiss-Prot;Acc:Q8CGP6]
20419	ENSMUST00000207665	3.08253	0.0014742	0.166541	up	ENSMUSG00000022322	Shcbp1	SHC SH2 domain-binding protein 1 [Source:UniProtKB/Swiss-Prot;Acc:Q9Z179]
71988	ENSMUST00000224162	3.07441	0.00010173	0.0395215	up	ENSMUSG00000022034	Esco2	N-acetyltransferase ESCO2 [Source:UniProtKB/Swiss-Prot;Acc:Q8CIB9]
224171	ENSMUST00000048374	3.0717	0.00010891	0.0408116	up	ENSMUSG00000033031	C330027C09Rik	Protein CIP2A [Source:UniProtKB/Swiss-Prot;Acc:Q8BWY9]
55943	ENSMUST00000108675	3.07083	0.0234676	0.521245	up	ENSMUSG00000020903	Stx8	syntaxin 8 [Source:MGI Symbol;Acc:MGI:1890156]
56504	ENSMUST00000002081	3.05485	0.0210575	0.503056	up	ENSMUSG00000002007	Srpk3	serine/arginine-rich protein specific kinase 3 [Source:MGI Symbol;Acc:MGI:1891338]
234258	ENSMUST00000135443	3.05033	0.0221388	0.511733	up	ENSMUSG00000039396	Neil3	Endonuclease 8-like 3 [Source:UniProtKB/Swiss-Prot;Acc:Q8K203]
329910	ENSMUST00000065253	3.0486	0.0359081	0.583512	up	ENSMUSG00000034853	Acot11	acyl-CoA thioesterase 11 [Source:MGI Symbol;Acc:MGI:1913736]
67367	ENSMUST00000023698	3.03177	8.15134e-05	0.0338825	up	ENSMUSG00000022974	Paxbp1	PAX3- and PAX7-binding protein 1 [Source:UniProtKB/Swiss-Prot;Acc:P58501]
692152	ENSMUST00000103339	3.02751	0.0240587	0.525066	up	ENSMUSG00000076538	Igkv13-84	immunoglobulin kappa chain variable 13-84
210544	ENSMUST00000022992	3.01531	0.0312186	0.56535	up	ENSMUSG00000022364	Tbc1d31	TBC1 domain family member 31 [Source:UniProtKB/Swiss-Prot;Acc:Q6NXY1]
72465	ENSMUST00000224946	3.01117	0.0231397	0.51943	up	ENSMUSG00000094870	Zfp131	zinc finger protein 131
213109	ENSMUST00000088310	3.00656	0.000219619	0.0616028	up	ENSMUSG00000048874	Phf3	PHD finger protein 3 [Source:HGNC Symbol;Acc:HGNC:8921]
13106	ENSMUST00000026552	2.99084	0.00945303	0.382467	up	ENSMUSG00000025479	Cyp2e1	Cytochrome P450 2E1 [Source:UniProtKB/Swiss-Prot;Acc:Q05421]
319277	ENSMUST00000217842	2.98316	0.00292147	0.223938	up	ENSMUSG00000034560	Washc4	WASH complex subunit 4
780938	ENSMUST00000192591	2.97801	0.0412114	0.60268	up	ENSMUSG00000104452	Ighv8-8	immunoglobulin heavy variable 8-8
16560	ENSMUST00000171796	2.97118	0.0386758	0.594424	up	ENSMUSG00000014602	Kif1a	kinesin family member 1A [Source:MGI Symbol;Acc:MGI:108391]
223970	ENSMUST00000037913	2.97003	7.45051e-05	0.0320263	up	ENSMUSG00000037991	Rmi2	RecQ-mediated genome instability protein 2 [Source:UniProtKB/Swiss-Prot;Acc:Q3UPE3]
15929	ENSMUST00000140944	2.9639	0.039403	0.596598	up	ENSMUSG00000002010	Idh3g	isocitrate dehydrogenase 3 (NAD+), gamma [Source:MGI Symbol;Acc:MGI:1099463]
21973	ENSMUST00000139730	2.95809	0.000249393	0.0659984	up	ENSMUSG00000020914	Top2a	DNA topoisomerase 2-alpha [Source:UniProtKB/Swiss-Prot;Acc:Q01320]
26897	ENSMUST00000222591	2.95727	0.00259542	0.210821	up	ENSMUSG00000072949	Acot1	acyl-CoA thioesterase 1
623474	ENSMUST00000070755	2.93763	0.000262293	0.067009	up	ENSMUSG00000078773	Rad54b	DNA repair and recombination protein RAD54B [Source:UniProtKB/Swiss-Prot;Acc:Q6PFE3]
380753	ENSMUST00000146040	2.93593	0.0226025	0.515361	up	ENSMUSG00000020564	Atxn7l1	Ataxin-7-like protein 1 [Source:UniProtKB/Swiss-Prot;Acc:Q9CZ05]
20419	ENSMUST00000022945	2.93584	0.00292504	0.223943	up	ENSMUSG00000022322	Shcbp1	SHC SH2 domain-binding protein 1 [Source:UniProtKB/Swiss-Prot;Acc:Q9Z179]
224109	ENSMUST00000099991	2.93552	0.00705691	0.343554	up	ENSMUSG00000052384	Nrros	Mus musculus negative regulator of reactive oxygen species (Nrros), transcript variant 2, mRNA. [Source:RefSeq mRNA;Acc:NM_001347181]
234023	ENSMUST00000048545	2.93426	0.0239095	0.523725	up	ENSMUSG00000040459	Arglu1	Arginine and glutamate-rich protein 1 [Source:UniProtKB/Swiss-Prot;Acc:Q3UL36]
26886	ENSMUST00000075550	2.93089	0.00243073	0.205899	up	ENSMUSG00000045273	Cenph	Centromere protein H [Source:UniProtKB/Swiss-Prot;Acc:Q9QYM8]
20877	ENSMUST00000021277	2.91872	0.00163617	0.173857	up	ENSMUSG00000020897	Aurkb	Aurora kinase B [Source:UniProtKB/Swiss-Prot;Acc:O70126]
71721	ENSMUST00000219514	2.91539	0.0251281	0.531127	up	ENSMUSG00000043259	Fam13c	Protein FAM13C [Source:UniProtKB/Swiss-Prot;Acc:Q9DBR2]
12977	ENSMUST00000120243	2.91509	0.0123918	0.425619	up	ENSMUSG00000014599	Csf1	Macrophage colony-stimulating factor 1 Processed macrophage colony-stimulating factor 1 [Source:UniProtKB/Swiss-Prot;Acc:P07141]
[truncated: 2,421 more rows]
