# Supplementary material for: Integrative Studies of Human Cord Blood Derived Mononuclear Cells and Umbilical Cord Derived Mesenchyme Stem Cells in Ameliorating Bronchopulmonary Dysplasia
Source: Front Cell Dev Biol. 2021 Nov 9;9:679866. doi: 10.3389/fcell.2021.679866 (PMC8631197; doi:10.3389/fcell.2021.679866)
Supplement: Supplementary file 2 [file Table_2.xlsx]

## Sheet: BPD VS MSC
ID	logFC	Pvalue	adj.Pvalue	regulation	pos_info	track_gene	gene_pos	ref_pos_info	ensembl	entrez	uniprot	symbol	description	F|T_BPD1	F|T_BPD2	F|T_BPD3	G|T_BPDM1	G|T_BPDM2	G|T_BPDM3
MERGE.23967.1	1.32856	0.0221478	0.685174	up	16:-:78337967-78340751	MERGE.23967	16:-:78337967-78340751	-	-	-	-	-	-	3.56242	1.33813	2.05908	0.59794	1.31471	0.99051
MERGE.10570.3	7.43887	0.0248369	0.701107	up	11:-:102476166-102556199	MERGE.10570	11:-:102475915-102556392	-	-	-	-	-	-	4.1356	0.86797	1.9125	0	0	2.51624
MERGE.52672.1	-5.87236356959245	0.000245526	0.0921792	down	7:-:63395908-63396142	MERGE.52672	7:-:63395908-63396142	-	-	-	-	-	-	0	0.1387	0	2.58704	3.74873	2.39563
NONMMUT073415.2	-1.1178047765642	0.0115253	0.583407	down	X:-:102543366-102544938	MERGE.63453	X:-:102509064-102644246	X:-:102543366-102544938	NONMMUG045541.2	-	-	-	lncRNA	1.85063	0.81505	1.18236	2.4786	2.83523	3.23003
NONMMUT048842.2	2.2913	0.0373923	0.730234	up	4:-:116383602-116385746	MERGE.41914	4:-:116306438-116464183	4:-:116383602-116385746	NONMMUG030332.2	-	-	-	lncRNA	1.22557	0.54198	0.61695	0.74554	0.05134	0.09186
NONMMUT077816.1	3.74688	0.0417856	0.730234	up	1:-:54384214-54386501	MERGE.865	1:-:54384214-54386501	1:-:54384214-54386501	NONMMUG048297.1	-	-	-	lncRNA	1.23985	0.58409	0.76598	0.28304	0	0.31372
MERGE.7400.13	1.49773	0.0138768	0.61557	up	11:+:3126973-3159576	MERGE.7400	11:+:3123861-3160339	-	-	-	-	-	-	3.74231	2.29277	3.6048	0.70765	1.25726	1.8618
NONMMUT065842.2	-2.0597902278165	0.0234222	0.693117	down	8:+:66387657-66388386	MERGE.56424	8:+:66387657-66388386	8:+:66387657-66388386	NONMMUG040736.2	-	-	-	lncRNA	0.59002	0.0893	0.11432	0.92334	0.84852	0.53984
NONMMUT096245.1	-5.94596004110841	0.0115161	0.583189	down	15:+:85668317-85669271	MERGE.21820	15:+:85668317-85669271	15:+:85668317-85669271	NONMMUG060164.1	-	-	-	lncRNA	0	0	1.52304	3.39059	2.30616	2.57907
MERGE.63343.1	-5.10225828365596	0.0190262	0.658461	down	X:-:98553954-98710561	MERGE.63343	X:-:98553954-98891025	-	-	-	-	-	-	2.08074	0.00347	0.05142	2.35193	3.18615	1.87733
NONMMUT002453.2	-1.46634918964859	0.0153248	0.629995	down	1:+:127242091-127243484	MERGE.2333	1:+:127242091-127243484	1:+:127242091-127243484	NONMMUG001656.2	-	-	-	lncRNA	0.38356	0.18706	0.19671	0.53093	0.89857	0.70675
NONMMUT126485.1	-1.04075185301774	0.0387656	0.730234	down	7:-:16033015-16033619	MERGE.51349	7:-:16033015-16033619	7:-:16033015-16033619	NONMMUG079354.1	-	-	-	lncRNA	4.90985	1.52649	1.9509	5.98561	4.89165	5.16447
MERGE.20110.1	-5.46051553692905	8.18654e-05	0.0458268	down	15:+:19525110-19525314	MERGE.20110	15:+:19525110-19525314	-	-	-	-	-	-	0	0	0	0.90258	2.14866	1.37311
MERGE.53007.29	4.98943	0.0276447	0.715879	up	7:-:73500881-73541736	MERGE.53007	7:-:73423634-73561696	-	-	-	-	-	-	2.03634	1.40738	2.50417	0.04741	1.99149	0
MERGE.44966.27	-1.09671383753674	0.0303361	0.730234	down	5:-:67773100-67847315	MERGE.44966	5:-:67618140-67847434	-	-	-	-	-	-	1.26795	1.75703	2.40774	3.36002	3.64958	5.43072
MERGE.23180.1	1.12239	0.040338	0.730234	up	16:-:29996765-30000632	MERGE.23180	16:-:29996765-30000632	-	-	-	-	-	-	3.41741	1.20223	1.77846	0.67995	0.95728	1.38269
NONMMUT058766.2	-1.32866903378255	0.00651382	0.47351	down	6:-:124316953-124319263	NONMMUG036531.2	6:-:124316953-124321576	6:-:124316953-124319263	NONMMUG036531.2	-	-	-	lncRNA	0.41619	0.32237	0.34718	0.79879	1.05884	1.07491
NONMMUT080841.1	1.59988	0.03235	0.730234	up	10:+:105858321-105859412	MERGE.6693	10:+:105858321-105859412	10:+:105858321-105859412	NONMMUG050291.1	-	-	-	lncRNA	0.84326	0.31839	0.50221	0.09682	0.20168	0.23199
NONMMUT094551.1	-1.3139934695011	0.0279053	0.718037	down	14:-:68436180-68439462	MERGE.19087	14:-:68436180-68461648	14:-:68436180-68439462	NONMMUG013281.2	-	-	-	lncRNA	0.80075	0.54275	0.29052	0.90578	1.71904	1.55191
NONMMUT091616.1	-1.03381499731961	0.0130319	0.604811	down	13:-:62743915-62746463	MERGE.15732	13:-:62743915-62746463	13:-:62743915-62746463	NONMMUG057069.1	-	-	-	lncRNA	0.49527	0.39641	0.46304	0.90736	0.90722	1.18713
NONMMUT071862.2	1.8652	0.00609857	0.459709	up	X:-:12645470-12647899	MERGE.62478	X:-:12645470-12647899	X:-:12645470-12647899	NONMMUG044526.2	-	-	-	lncRNA	1.06961	0.43818	0.44647	0.20124	0.14161	0.16217
MERGE.7202.3	1.51926	0.0171968	0.646631	up	10:-:127095652-127121125	MERGE.7202	10:-:127094479-127121131	-	-	-	-	-	-	1.60496	1.43835	0.99006	0.28472	0.87525	0.47925
MERGE.48457.1	1.67882	0.0149907	0.627229	up	6:+:47741348-47741901	MERGE.48457	6:+:47741348-47741901	-	-	-	-	-	-	2.06431	0.9806	2.36721	0.57255	0.44723	0.60972
NONMMUT106080.1	-1.56787119661921	0.0154552	0.631335	down	19:-:27195204-27200421	NONMMUG021079.2	19:-:27115244-27200421	19:-:27195204-27200421	NONMMUG021079.2	-	-	-	lncRNA	0.37003	0.09995	0.12566	0.46098	0.42999	0.6932
MERGE.56540.1	1.17251	0.0425317	0.730234	up	8:-:69891610-69893212	MERGE.56540	8:-:69891610-69893212	-	-	-	-	-	-	1.27861	0.82013	0.89249	0.68432	0.60967	0.2195
MERGE.33700.1	-1.37953342533183	0.00982239	0.557856	down	2:+:112521576-112523317	MERGE.33700	2:+:112521576-112523317	-	-	-	-	-	-	1.26185	0.4366	0.5612	1.69947	2.11767	1.76131
NONMMUT017565.2	-1.16970773372744	0.0439317	0.730234	down	13:-:53138232-53139480	MERGE.15407	13:-:53138232-53139480	13:-:53138232-53139480	NONMMUG011008.2	-	-	-	lncRNA	0.26161	0.12179	0.315	0.49733	0.50695	0.50708
NONMMUT056197.2	-1.01272363489449	0.0409602	0.730234	down	6:+:31292534-31293666	MERGE.48058	6:+:31219939-31516811	6:+:31292534-31293666	NONMMUG034895.3	-	-	-	lncRNA	1.40264	0.70004	0.99965	2.43798	1.40929	2.83226
NONMMUT041767.2	5.52279	0.0223658	0.686982	up	2:+:178422568-178424424	MERGE.35876	2:+:178414524-178424428	2:+:178422568-178424424	NONMMUG025842.2	-	-	-	lncRNA	3.86303	4.21845	4.00615	5.05312	0.00741	0.00758
NONMMUT030277.2	-3.53231488908562	0.0156099	0.632225	down	17:-:65965705-65967423	MERGE.26492	17:-:65965705-66077089	17:-:65965705-65967423	NONMMUG018717.2	-	-	-	lncRNA	2.37602	0.06953	0.06936	2.34497	2.54638	2.51357
NONMMUT020554.2	-1.10300166595678	0.0174334	0.648164	down	14:+:45226696-45231423	MERGE.18204	14:+:45226696-45232718	14:+:45226696-45231423	NONMMUG012777.2	-	-	-	lncRNA	1.41989	0.67562	0.85987	2.27821	1.56922	2.82201
NONMMUT053775.2	2.10317	0.0137188	0.613328	up	5:+:110661392-110662998	MERGE.45965	5:+:110653451-110662998	5:+:110661392-110662998	NONMMUG033359.2	-	-	-	lncRNA	1.21073	1.66322	2.44081	0.3043	0.26553	0.95464
MERGE.51375.1	-1.51506366450879	0.027174	0.714183	down	7:+:16454239-16454934	MERGE.51375	7:+:16454239-16454934	-	-	-	-	-	-	0.9176	0.31221	0.34259	2.10779	1.06797	1.05153
MERGE.2589.11	5.34037	0.0278313	0.717224	up	1:-:133624591-133661281	MERGE.2589	1:-:133619862-133661380	-	-	-	-	-	-	0.6757	0.64195	0.43673	0	0.90682	0
NONMMUT141299.1	-1.6609033962878	0.00179081	0.270316	down	12:+:21045768-21049032	MERGE.11811	12:+:20990459-21270171	12:+:21045768-21049032	NONMMUG008611.3	-	-	-	lncRNA	0.50948	0.47919	0.35785	1.25485	1.57253	1.78462
NONMMUT144286.1	1.13782	0.0147149	0.625329	up	16:+:20563842-20566227	MERGE.22975	16:+:20563842-20566227	16:+:20563842-20566227	NONMMUG090860.1	-	-	-	lncRNA	1.46904	0.81966	0.95437	0.42097	0.46152	0.67835
MERGE.61014.1	-2.06006759445343	0.00159976	0.252194	down	9:+:88556320-88559204	MERGE.61014	9:+:88556320-88559204	-	-	-	-	-	-	3.38231	1.54031	1.09923	7.91151	6.68921	9.43005
NONMMUT008222.2	1.65265	0.0210982	0.676406	up	11:+:3125936-3129209	MERGE.7400	11:+:3123861-3160339	11:+:3125936-3129209	NONMMUG005081.2	-	-	-	lncRNA	1.30718	0.97274	0.8322	0.1805	0.56396	0.34171
MERGE.63730.1	-1.2823085361634	0.0257347	0.706172	down	X:-:124281035-124282625	MERGE.63730	X:-:124281035-124282625	-	-	-	-	-	-	0.53211	0.45072	0.49457	0.79747	1.90338	1.3977
NONMMUT123109.1	1.26731	0.0435583	0.730234	up	6:+:133114953-133115763	MERGE.50654	6:+:133114953-133115763	6:+:133114953-133115763	NONMMUG077213.1	-	-	-	lncRNA	1.59328	0.71004	0.63212	0.32593	0.33945	0.46857
MERGE.27218.4	1.11812	0.0217906	0.681748	up	18:-:6439592-6516061	MERGE.27218	18:-:6435951-6516108	-	-	-	-	-	-	2.367	2.47364	1.90003	0.75803	1.18122	1.54054
NONMMUT075145.1	-1.88003409114902	0.00198687	0.284222	down	1:+:23322897-23324140	MERGE.368	1:+:23322897-23324140	1:+:23322897-23324140	NONMMUG046592.1	-	-	-	lncRNA	0.57308	0.41923	0.71878	2.9535	1.88105	1.91203
NONMMUT057606.2	-4.40966360311403	0.000219209	0.0848549	down	6:-:83364157-83367813	MERGE.49226	6:-:83362373-83459084	6:-:83364157-83367813	NONMMUG035780.2	-	-	-	lncRNA	0.24368	0.97152	0.93239	14.1235	15.3721	12.1924
NONMMUT075504.1	1.54667	0.00764857	0.506564	up	1:+:58505149-58523231	MERGE.996	1:+:58505144-58525672	1:+:58505149-58523231	NONMMUG000698.3	-	-	-	lncRNA	0.71108	0.39543	0.43391	0.13171	0.16103	0.27746
MERGE.40920.1	1.68437	0.0189608	0.658074	up	4:-:62300338-62360469	MERGE.40920	4:-:62300338-62360548	-	-	-	-	-	-	5.21648	15.7936	15.8177	4.51132	3.05405	3.22386
NONMMUT036477.2	5.42123	0.0135327	0.610671	up	2:-:28822302-28823787	MERGE.31751	2:-:28822299-28840360	2:-:28822302-28823787	NONMMUG022439.2	-	-	-	lncRNA	2.47871	3.69966	3.61836	0.00889	0.00926	2.41518
NONMMUT083447.1	-2.82961231954225	0.0208809	0.675085	down	11:+:31109323-31110396	NONMMUG051962.1	11:+:31109079-31110396	11:+:31109323-31110396	NONMMUG051962.1	-	-	-	lncRNA	0.06914	0.07081	0.09991	0.29534	0.67927	1.25804
MERGE.20773.1	-5.30293708731763	0.0006378	0.162906	down	15:-:49322642-49322878	MERGE.20773	15:-:49322642-49322878	-	-	-	-	-	-	0	0	0.20122	2.23062	2.43935	1.78156
NONMMUT098451.1	-3.70517307402773	0.00102211	0.209311	down	16:+:40308965-40311726	NONMMUG061537.1	16:+:40308965-40311726	16:+:40308965-40311726	NONMMUG061537.1	-	-	-	lncRNA	0.05377	0.01967	0.03885	0.44023	0.37377	0.70321
MERGE.19539.1	-1.13881342632424	0.0489497	0.730234	down	14:+:99618037-99619366	MERGE.19539	14:+:99618037-99619366	-	-	-	-	-	-	0.65886	0.56367	0.75298	1.00365	1.42824	2.61381
NONMMUT029439.2	1.50778	0.0157577	0.633952	up	17:+:35345853-35346762	MERGE.25736	17:+:35342242-35346762	17:+:35345853-35346762	NONMMUG018190.2	-	-	-	lncRNA	5.02693	4.9191	5.97417	1.07474	3.2824	2.27355
MERGE.48838.1	-1.08314748541802	0.0424525	0.730234	down	6:-:59596994-59597602	MERGE.48838	6:-:59596994-59597602	-	-	-	-	-	-	1.2194	0.42818	0.5873	1.60593	1.26574	1.5253
NONMMUT123114.1	1.97163	0.00863245	0.530763	up	6:+:133136033-133138248	NONMMUG077218.1	6:+:133136033-133138248	6:+:133136033-133138248	NONMMUG077218.1	-	-	-	lncRNA	1.68228	0.72564	0.65098	0.17296	0.21119	0.41918
NONMMUT011730.2	-1.74209258128031	0.0154046	0.630645	down	11:+:96579219-96582455	MERGE.10240	11:+:96464593-96759130	11:+:96579219-96582455	NONMMUG007421.2	-	-	-	lncRNA	0.25616	0.0694	0.27416	0.48543	0.65505	0.6518
MERGE.31347.21	-5.58284639248986	0.0434819	0.730234	down	2:-:17397058-17731043	MERGE.31347	2:-:17342673-17731464	-	-	-	-	-	-	0.06684	0	0.307	3.73363	2.35379	0.29556
NONMMUT002114.2	-2.96725570587563	0.00235754	0.304775	down	1:-:95583050-95585360	NONMMUG001420.2	1:-:95582143-95585360	1:-:95583050-95585360	NONMMUG001420.2	-	-	-	lncRNA	0.16067	0.10343	0.04643	0.52614	0.79814	1.04751
MERGE.11838.1	1.42696	0.00508934	0.424948	up	12:-:23022418-23023537	MERGE.11838	12:-:23022418-23023537	-	-	-	-	-	-	1.48523	1.50364	1.50091	0.55462	0.56534	0.65345
MERGE.35227.1	1.29172	0.0112855	0.579911	up	2:+:158399396-158400590	MERGE.35227	2:+:158399396-158400590	-	-	-	-	-	-	1.70273	1.03649	0.90788	0.57511	0.43771	0.49466
NONMMUT001227.2	2.24683	0.00107652	0.212539	up	1:+:63114740-63158295	MERGE.1050	1:+:63113078-63158295	1:+:63114740-63158295	NONMMUG000830.2	-	-	-	lncRNA	1.97687	1.18836	1.0832	0.30594	0.23101	0.39095
NONMMUT074648.2	-1.23035894071899	0.0174393	0.648227	down	X:+:166170481-166173319	MERGE.64326	X:+:166170454-166190512	X:+:166170481-166173319	NONMMUG046321.2	-	-	-	lncRNA	0.36097	0.30616	0.16798	0.72157	0.6497	0.61969
MERGE.4634.1	-1.64606296649194	0.00233478	0.304775	down	10:+:18352200-18355192	MERGE.4634	10:+:18352200-18355192	-	-	-	-	-	-	0.78901	0.31945	0.55767	2.00476	1.48089	1.7587
NONMMUT135685.1	3.37162	0.0332925	0.730234	up	X:+:6660334-6661326	MERGE.62351	X:+:6660334-6661326	X:+:6660334-6661326	NONMMUG085555.1	-	-	-	lncRNA	0.98716	0.24071	0.30015	0.06655	0.12476	0
NONMMUT023755.2	-1.13563446137103	0.00672735	0.478248	down	15:-:64020241-64060428	MERGE.21012	15:-:63929097-64060478	15:-:64020241-64060428	NONMMUG014666.2	-	-	-	lncRNA	1.79546	1.10146	1.26336	3.47348	2.51707	3.76357
MERGE.34764.1	-1.20211522375676	0.0169411	0.644318	down	2:-:148700947-148701988	MERGE.34764	2:-:148700947-148701988	-	-	-	-	-	-	0.72694	0.84459	1.09839	1.77572	2.32497	2.59335
NONMMUT041276.2	-1.06332875738936	0.0260572	0.707188	down	2:-:167235966-167240526	MERGE.35495	2:-:167191805-167266000	2:-:167235966-167240526	NONMMUG025556.2	-	-	-	lncRNA	3.4029	1.18869	1.9709	3.49752	5.02489	5.09466
MERGE.57464.4	-7.99664753663332	0.00467619	0.413963	down	8:-:95449633-95488454	MERGE.57464	8:-:95446096-95490039	-	-	-	-	-	-	0	0	0.59176	2.19292	2.9058	3.56421
NONMMUT052905.2	-1.27774617368548	0.010004	0.561412	down	5:+:81049531-81051739	MERGE.45259	5:+:81049531-81051739	5:+:81049531-81051739	NONMMUG032851.2	-	-	-	lncRNA	10.1106	3.68088	4.77535	13.1204	13.6961	16.7013
MERGE.1494.1	-1.35871355422999	0.0234327	0.693117	down	1:-:80742414-80743009	MERGE.1494	1:-:80742414-80743009	-	-	-	-	-	-	2.59167	0.94795	1.36024	3.59238	2.95622	6.25789
MERGE.10603.3	-4.13232009233579	0.0176929	0.650254	down	11:-:102994049-103028304	MERGE.10603	11:-:102994047-103028333	-	-	-	-	-	-	0.00765	0.69411	0.03071	1.02136	1.51761	1.76201
NONMMUT004371.2	1.37685	0.0281271	0.719481	up	1:-:191436340-191465048	NONMMUG002829.2	1:-:191436340-191465227	1:-:191436340-191465048	NONMMUG002829.2	-	-	-	lncRNA	1.21434	1.24822	0.85479	0.34357	0.87149	0.28916
MERGE.41262.1	-1.45240481377791	0.0240776	0.697068	down	4:+:85775364-85775895	MERGE.41262	4:+:85775364-85775895	-	-	-	-	-	-	1.61923	0.7148	0.49302	1.76384	2.89787	2.56619
NONMMUT009903.2	-3.19639630006716	0.0171214	0.645614	down	11:-:57948729-57949085	MERGE.8645	11:-:57948729-57949085	11:-:57948729-57949085	NONMMUG006209.2	-	-	-	lncRNA	0.0416	0.15217	0.06679	1.62891	0.77114	0.39424
MERGE.57124.1	-1.29820344802964	0.0148855	0.625932	down	8:+:84918495-84918974	MERGE.57124	8:+:84918495-84918974	-	-	-	-	-	-	1.33052	0.63379	0.74513	2.2578	2.58092	1.75929
NONMMUT027635.2	-2.46126051234976	0.00316566	0.352286	down	16:-:90667439-90677000	MERGE.24173	16:-:90667439-90677297	16:-:90667439-90677000	NONMMUG017121.2	-	-	-	lncRNA	0.15463	0.11907	0.06533	0.5359	0.84475	0.50128
NONMMUT037793.2	-1.78260111891254	0.0447361	0.730234	down	2:-:71032872-71033500	MERGE.32804	2:-:71032872-71033500	2:-:71032872-71033500	NONMMUG023340.2	-	-	-	lncRNA	0.30696	0.10364	0.09477	0.33619	0.52521	0.7384
NONMMUT123056.1	1.37257	0.0286943	0.724147	up	6:+:127807155-127812631	MERGE.50511	6:+:127807155-127820031	6:+:127807155-127812631	NONMMUG036652.2	-	-	-	lncRNA	1.53497	0.59264	1.23214	0.30353	0.57957	0.40405
MERGE.64394.1	7.30562	0.0171362	0.645614	up	Y:-:1147432-1150729	MERGE.64394	Y:-:1147432-1150729	-	-	-	-	-	-	5.59325	3.14947	4.26565	4.58446	0	0
MERGE.14261.1	1.308	0.0338602	0.730234	up	13:-:8980867-8981519	MERGE.14261	13:-:8980867-8981519	-	-	-	-	-	-	3.98032	1.41428	1.64317	1.07269	1.09613	0.56039
NONMMUT009121.2	1.25382	0.0448754	0.730234	up	11:-:30910062-30911147	MERGE.8083	11:-:30910062-30911147	11:-:30910062-30911147	NONMMUG005660.2	-	-	-	lncRNA	1.32659	0.47022	1.05389	0.4016	0.27885	0.46655
MERGE.13559.2	-3.43097537812584	2.98391e-05	0.0258508	down	12:-:100300774-100520712	MERGE.13559	12:-:100300770-100520826	-	-	-	-	-	-	0.59734	0.56623	1.03103	8.7943	8.27556	7.09829
NONMMUT064713.2	1.09662	0.0490709	0.730234	up	8:-:15024326-15028422	MERGE.55257	8:-:15024326-15028422	8:-:15024326-15028422	NONMMUG039961.2	-	-	-	lncRNA	0.55827	0.6789	0.92246	0.56453	0.33597	0.22673
NONMMUT145811.1	1.10242	0.0366982	0.730234	up	19:+:8724005-8726443	MERGE.29431	19:+:8723407-8726445	19:+:8724005-8726443	NONMMUG020761.3	-	-	-	lncRNA	3.24697	6.06846	4.64106	2.23691	2.2715	2.24316
NONMMUT067029.2	2.86592	0.00375798	0.37473	up	8:-:106849302-106851409	MERGE.57700	8:-:106849302-106851409	8:-:106849302-106851409	NONMMUG041497.2	-	-	-	lncRNA	2.57167	0.58758	1.3008	0.20063	0.1306	0.21365
MERGE.22369.1	-1.15912184513055	0.0172074	0.64664	down	15:-:102189484-102191087	MERGE.22369	15:-:102189484-102191087	-	-	-	-	-	-	4.15753	1.76116	1.62777	5.18274	4.92584	6.48438
NONMMUT066570.2	3.38853	0.0358777	0.730234	up	8:-:88385850-88389035	MERGE.57234	8:-:88379905-88389035	8:-:88385850-88389035	NONMMUG041207.2	-	-	-	lncRNA	0.7621	1.57748	0.94543	0.1233	0.00803	0.77142
NONMMUT068873.2	2.73634	0.0180989	0.653666	up	9:-:44747910-44749740	MERGE.59825	9:-:44741564-44767845	9:-:44747910-44749740	NONMMUG042624.2	-	-	-	lncRNA	1.5412	0.58746	0.56648	0.50527	0.06766	0.04612
MERGE.45141.1	1.15902	0.0285019	0.722145	up	5:+:75151388-75163749	MERGE.45141	5:+:75151388-75198215	-	-	-	-	-	-	2.59636	1.5113	1.81521	1.31667	0.90558	0.58202
MERGE.31535.6	5.7889	0.0210225	0.675928	up	2:-:24925352-24935145	MERGE.31535	2:-:24924655-24935252	-	-	-	-	-	-	1.8436	1.81657	1.90271	2.352	0	0
NONMMUT040059.2	-1.04041063677328	0.0276019	0.715612	down	2:+:134929754-134932370	MERGE.34429	2:+:134929754-134932370	2:+:134929754-134932370	NONMMUG024797.2	-	-	-	lncRNA	1.08398	0.95904	0.91569	1.45446	2.45106	2.98481
MERGE.18086.2	-3.53244280214241	0.0317935	0.730234	down	14:-:40993665-41007179	MERGE.18086	14:-:40993417-41013788	-	-	-	-	-	-	2.29069	0.05441	0.12537	1.01257	4.62506	4.78542
MERGE.18086.4	10.8698	3.37235e-06	0.00724734	up	14:-:40993737-41006952	MERGE.18086	14:-:40993417-41013788	-	-	-	-	-	-	4.98106	9.51519	8.12807	0	0	0
NONMMUT147232.1	3.03082	0.0408451	0.730234	up	2:-:168917517-168917960	MERGE.35577	2:-:168917517-168917960	2:-:168917517-168917960	NONMMUG092600.1	-	-	-	lncRNA	1.47185	0.39153	0.51018	0.11907	0	0.25359
MERGE.52996.1	-1.20159197296089	0.0302621	0.730234	down	7:-:74448113-74449061	MERGE.52996	7:-:74448113-74449061	-	-	-	-	-	-	1.65416	0.75952	0.5509	1.9574	2.64207	1.86769
NONMMUT107230.1	-1.6945687008093	0.0127989	0.603254	down	2:+:67891368-67891997	MERGE.32727	2:+:67891368-67891997	2:+:67891368-67891997	NONMMUG067038.1	-	-	-	lncRNA	0.23575	0.37941	0.34063	1.2587	0.89581	1.20637
NONMMUT151743.1	4.37754	0.0330328	0.730234	up	7:-:80978309-80993554	MERGE.53171	7:-:80978309-80993556	7:-:80978309-80993554	NONMMUG038510.3	-	-	-	lncRNA	0.71882	0.37031	0.4226	0	0	0.67158
MERGE.6617.1	1.45956	0.0348871	0.730234	up	10:-:99261023-99261454	MERGE.6617	10:-:99261023-99261454	-	-	-	-	-	-	1.82216	1.10662	0.93832	0.67306	0.50981	0.26064
MERGE.50770.1	1.86622	0.0112165	0.579911	up	6:+:136841453-136842294	MERGE.50770	6:+:136841453-136842294	-	-	-	-	-	-	1.5699	0.86455	2.40708	0.47089	0.42504	0.36774
MERGE.7741.1	-1.04123039497722	0.0114728	0.58273	down	11:-:18924522-18927503	MERGE.7741	11:-:18924522-18927503	-	-	-	-	-	-	3.96958	1.94929	2.06698	4.80435	5.64536	6.24897
MERGE.16410.1	-1.25143412933937	0.00993576	0.560891	down	13:-:92059694-92061795	MERGE.16410	13:-:92059694-92061795	-	-	-	-	-	-	1.90776	0.95108	1.41228	2.54645	3.87669	4.49281
NONMMUT150723.1	3.77338	0.0379165	0.730234	up	6:-:133102486-133104672	MERGE.50650	6:-:133102486-133104672	6:-:133102486-133104672	NONMMUG094734.1	-	-	-	lncRNA	1.37861	0.45209	0.6051	0.19338	0.27064	0
MERGE.1889.1	-1.2291794588978	0.00622981	0.461556	down	1:-:95609487-95614513	MERGE.1889	1:-:95609487-95614513	-	-	-	-	-	-	1.55763	0.81022	1.29117	2.54577	2.72033	3.80508
MERGE.39341.1	-1.90639529926797	0.0476317	0.730234	down	3:-:138684533-138684823	MERGE.39341	3:-:138684533-138684823	-	-	-	-	-	-	1.93947	0.14935	0.90133	2.31628	3.12193	1.93462
NONMMUT044436.2	7.81834	1.49993e-06	0.00609649	up	3:+:100686630-100688074	MERGE.38348	3:+:100686630-100688074	3:+:100686630-100688074	NONMMUG027420.2	-	-	-	lncRNA	2.57015	1.93008	2.0631	0	0	0
MERGE.37870.1	1.32348	0.00958888	0.55368	up	3:+:89351664-89352569	MERGE.37870	3:+:89351664-89352569	-	-	-	-	-	-	2.65571	1.63095	1.59225	1.10866	0.66849	0.68352
NONMMUT011932.2	-4.31371345648622	0.00430932	0.399257	down	11:+:98904968-98905576	MERGE.10390	11:+:98863638-98905576	11:+:98904968-98905576	NONMMUG007545.2	-	-	-	lncRNA	0.12194	0.14273	0.13704	6.0331	1.46916	2.88882
NONMMUT067454.2	-1.62325154086867	0.00866708	0.530958	down	8:-:121058803-121060413	MERGE.58951	8:-:121041758-121090511	8:-:121058803-121060413	NONMMUG041781.3	-	-	-	lncRNA	1.53691	0.56713	1.00443	4.76855	2.54625	2.46172
NONMMUT065512.2	-4.24505435519506	0.0103176	0.56687	down	8:-:47182230-47185991	MERGE.56116	8:-:47180048-47446362	8:-:47182230-47185991	NONMMUG040516.2	-	-	-	lncRNA	0.14213	0.09242	0.12043	0.56561	4.51512	5.35364
MERGE.64390.1	7.29676	0.0142039	0.619236	up	Y:-:1091112-1095680	MERGE.64390	Y:-:1091112-1095680	-	-	-	-	-	-	3.83578	1.75495	2.45801	2.0769	0	0
NONMMUT098137.1	-2.05076994143347	0.0238671	0.694696	down	16:+:21863835-21864451	MERGE.23017	16:+:21863835-21864451	16:+:21863835-21864451	NONMMUG061335.1	-	-	-	lncRNA	0.14443	0.12327	0.15458	0.77114	0.35695	0.88963
MERGE.55607.1	1.25554	0.0186287	0.65719	up	8:+:33621463-33624289	MERGE.55607	8:+:33621463-33624289	-	-	-	-	-	-	1.74949	1.02232	1.2483	0.84619	0.3457	0.68704
MERGE.48717.1	-1.138500809307	0.018622	0.65719	down	6:+:54223135-54227633	MERGE.48717	6:+:54223135-54227633	-	-	-	-	-	-	1.72985	0.56269	1.10768	2.31485	2.56696	2.41194
NONMMUT057177.2	-1.20178118067287	0.0221464	0.685174	down	6:-:58973197-58975291	MERGE.48819	6:-:58932090-59024549	6:-:58973197-58975291	NONMMUG035494.2	-	-	-	lncRNA	5.47301	1.74774	3.56811	6.24546	7.87785	10.3055
MERGE.937.1	-1.05325437376076	0.0460694	0.730234	down	1:+:55599874-55600347	MERGE.937	1:+:55599874-55600347	-	-	-	-	-	-	2.85139	2.06297	2.69128	3.56899	5.80797	8.64058
MERGE.50658.1	-1.48548857409101	0.0102833	0.566647	down	6:+:133721412-133721788	MERGE.50658	6:+:133721412-133721788	-	-	-	-	-	-	0.70913	0.80695	0.63247	2.10341	2.11767	2.16528
MERGE.15138.1	-1.23134458216135	0.00748687	0.501001	down	13:-:43247227-43248505	MERGE.15138	13:-:43247227-43248505	-	-	-	-	-	-	1.16124	0.65411	0.73639	1.87034	1.90491	2.48694
NONMMUT007491.2	-4.56572547001094	0.0259182	0.706172	down	10:+:116949704-116963379	MERGE.6912	10:+:116949704-116964327	10:+:116949704-116963379	NONMMUG004760.3	-	-	-	lncRNA	0.00602	0.58087	0.00483	0.74941	0.64671	0.80946
NONMMUT030115.2	-5.16339135241874	0.0099455	0.560891	down	17:-:56429230-56430711	MERGE.26252	17:-:56410675-56476483	17:-:56429230-56430711	NONMMUG018607.2	-	-	-	lncRNA	3.34383	0.01729	0.02845	3.41713	4.97156	3.78451
NONMMUT026380.2	-1.43748109044512	0.0372712	0.730234	down	16:-:33974020-33975536	MERGE.23350	16:-:33974020-34573532	16:-:33974020-33975536	NONMMUG016329.2	-	-	-	lncRNA	0.13707	0.27932	0.24363	0.4966	0.54443	0.92777
NONMMUT032396.2	-1.0557847401477	0.00768299	0.507406	down	18:-:54935699-54937969	MERGE.28282	18:-:54933455-54937969	18:-:54935699-54937969	NONMMUG019953.2	-	-	-	lncRNA	11.3665	5.96116	6.33118	15.2242	16.7955	17.4024
MERGE.13938.1	-1.16029197423904	0.0307268	0.730234	down	12:+:110889594-110890779	MERGE.13938	12:+:110889594-110890779	-	-	-	-	-	-	1.46519	0.86114	0.50262	2.27331	1.68289	2.21914
NONMMUT019889.2	-1.1141407736058	0.040122	0.730234	down	14:+:21160764-21162717	MERGE.17563	14:+:21160764-21162717	14:+:21160764-21162717	NONMMUG012342.2	-	-	-	lncRNA	1.76342	0.64501	1.26299	1.83298	2.59941	3.86792
NONMMUT008559.2	-1.66014774203713	0.00427938	0.397863	down	11:-:8661610-8664540	MERGE.7620	11:-:8431652-8664540	11:-:8661610-8664540	NONMMUG005291.2	-	-	-	lncRNA	0.50673	0.45595	0.23999	1.54214	1.19756	1.17166
NONMMUT041287.2	6.14033	0.00983891	0.558053	up	2:+:167553314-167607845	MERGE.35511	2:+:167553314-167607846	2:+:167553314-167607845	NONMMUG025564.2	-	-	-	lncRNA	1.66251	1.07089	1.46443	0	0.83857	0
MERGE.35564.13	9.71109	0.0171195	0.645614	up	2:-:168182665-168206176	MERGE.35564	2:-:168180986-168230591	-	-	-	-	-	-	0.11928	12.8994	1.10522	0	0	0
NONMMUT115236.1	-1.03864000082176	0.0454889	0.730234	down	4:+:85869779-85870825	MERGE.41298	4:+:85869779-85870825	4:+:85869779-85870825	NONMMUG072266.1	-	-	-	lncRNA	0.72346	0.51886	0.75154	0.94673	1.77484	1.78786
NONMMUT106571.1	1.4821	0.00746769	0.500945	up	2:+:4944480-4949988	MERGE.31058	2:+:4943929-4949988	2:+:4944480-4949988	NONMMUG066594.1	-	-	-	lncRNA	1.01909	0.44178	0.5973	0.28789	0.1749	0.29891
MERGE.60971.2	-6.5250549529857	0.046023	0.730234	down	9:-:85687360-85731235	MERGE.60971	9:-:85687360-85749334	-	-	-	-	-	-	0	6.37449	0	5.54333	1.8776	2.68965
MERGE.2768.11	-1.6233721890787	0.00775568	0.508792	down	1:-:138117344-138175249	MERGE.2768	1:-:138062861-138175708	-	-	-	-	-	-	1.44735	2.45732	3.77498	7.23411	7.1666	9.0838
MERGE.158.1	-1.88579029302385	0.0274715	0.715542	down	1:+:9825910-9826587	MERGE.158	1:+:9825910-9826587	-	-	-	-	-	-	0.61337	0.2564	0.24618	2.61209	0.9339	0.8511
NONMMUT117923.1	-1.19317704202233	0.0129738	0.604811	down	5:+:9181841-9182929	MERGE.43715	5:+:9181841-9183840	5:+:9181841-9182929	NONMMUG073990.1	-	-	-	lncRNA	2.45492	1.68612	1.47795	3.21611	5.47309	5.24718
MERGE.41392.5	1.81469	0.000751403	0.180343	up	4:-:89303657-89311016	MERGE.41392	4:-:89264523-89311032	-	-	-	-	-	-	4.28159	3.38252	4.46189	1.02498	1.70803	1.03226
NONMMUT011502.2	-1.29488438112576	0.00632494	0.466491	down	11:-:90525927-90529689	MERGE.10089	11:-:90525927-90529689	11:-:90525927-90529689	NONMMUG007271.2	-	-	-	lncRNA	0.82096	0.36958	0.4087	1.24683	1.21078	1.50356
NONMMUT044848.2	1.2631	0.0287655	0.724224	up	3:-:113595107-113596187	MERGE.38691	3:-:113593906-113596187	3:-:113595107-113596187	NONMMUG027697.2	-	-	-	lncRNA	2.25326	1.6986	0.94848	0.73357	0.82768	0.49475
MERGE.45468.1	-1.17943875952744	0.00934855	0.546342	down	5:-:98017861-98018533	MERGE.45468	5:-:98017861-98018533	-	-	-	-	-	-	4.10479	1.84043	3.63156	7.65883	6.85176	7.61227
MERGE.16415.1	-1.2676003690977	0.0053239	0.433871	down	13:-:92087648-92089495	MERGE.16415	13:-:92087648-92089495	-	-	-	-	-	-	1.28591	0.94657	0.929	2.11691	2.90493	3.24441
NONMMUT129799.1	-1.41332128349951	0.0167282	0.642243	down	8:+:126262110-126263284	NONMMUG081556.1	8:+:126262110-126263284	8:+:126262110-126263284	NONMMUG081556.1	-	-	-	lncRNA	0.20224	0.28665	0.27396	0.87734	0.7146	0.58693
NONMMUT018432.2	-1.60546896951732	0.0404559	0.730234	down	13:+:78206669-78208341	MERGE.16237	13:+:78206669-78208341	13:+:78206669-78208341	NONMMUG011469.2	-	-	-	lncRNA	0.42613	0.06494	0.15678	0.41079	0.46075	0.64777
MERGE.8839.1	-1.13857829701229	0.0276203	0.715612	down	11:-:61594688-61595070	MERGE.8839	11:-:61594688-61595070	-	-	-	-	-	-	1.4736	0.65247	1.05836	2.07045	2.69547	2.16811
NONMMUT039729.2	-1.03858748754037	0.0244264	0.699245	down	2:-:128298663-128429351	MERGE.34196	2:-:128178319-128502765	2:-:128298663-128429351	NONMMUG024582.3	-	-	-	lncRNA	0.3186	0.18257	0.25149	0.43944	0.6693	0.51326
MERGE.4597.1	-3.93862268920021	0.0080728	0.519747	down	10:-:15342015-15342222	MERGE.4597	10:-:15342015-15342222	-	-	-	-	-	-	0	0	0.11464	0.50832	2.25003	0.27066
NONMMUT117922.1	-1.640817136996	0.00316448	0.352286	down	5:+:9177711-9178717	MERGE.43713	5:+:9177711-9178717	5:+:9177711-9178717	NONMMUG073989.1	-	-	-	lncRNA	1.5044	0.88474	0.92346	2.79552	3.4173	4.83587
NONMMUT143017.1	-1.15237319911133	0.0392343	0.730234	down	14:+:21995052-21999139	MERGE.17552	14:+:21992436-21999139	14:+:21995052-21999139	NONMMUG012372.3	-	-	-	lncRNA	0.50171	0.28512	0.14645	0.64569	0.62638	0.67582
NONMMUT149206.1	1.66352	0.0134406	0.60923	up	5:+:134676490-134680145	MERGE.46723	5:+:134676490-134680145	5:+:134676490-134680145	NONMMUG093843.1	-	-	-	lncRNA	0.64688	0.46375	0.81004	0.29933	0.17985	0.14712
MERGE.38156.1	-1.35394169265952	0.0181009	0.653666	down	3:-:95878500-95882962	MERGE.38156	3:-:95878500-95892916	-	-	-	-	-	-	0.7847	0.67125	1.09214	2.41578	3.49547	1.44521
MERGE.39076.2	-9.85296111797369	0.00802503	0.517384	down	3:-:129269572-129332720	MERGE.39076	3:-:129269175-129332720	-	-	-	-	-	-	19.329	0	0	23.9873	26.1799	22.5044
MERGE.8114.1	-5.09767642952586	0.00156727	0.249991	down	11:-:33147475-33147867	MERGE.8114	11:-:33147475-33147867	-	-	-	-	-	-	0	0	0	1.07614	1.1208	0.14325
MERGE.36649.1	-1.088989754929	0.0201666	0.6677	down	3:+:32863166-32865547	MERGE.36649	3:+:32863166-32865547	-	-	-	-	-	-	0.86046	0.49262	0.4955	1.0653	1.28287	1.83167
NONMMUT081539.1	-1.11499049981577	0.023226	0.692731	down	10:-:9578916-9580080	MERGE.4490	10:-:9578916-9580080	10:-:9578916-9580080	NONMMUG050760.1	-	-	-	lncRNA	0.9944	0.3917	0.49121	1.21387	1.45329	1.25642
MERGE.50868.1	-1.84089455301495	0.00986373	0.558794	down	6:+:145155905-145157376	MERGE.50868	6:+:145155905-145157376	-	-	-	-	-	-	0.86773	0.20667	0.65604	1.58022	1.69256	2.32341
MERGE.40441.1	-1.65177545998917	0.0457972	0.730234	down	4:+:41837864-41838127	MERGE.40441	4:+:41837864-41838127	-	-	-	-	-	-	3.43178	0.98773	0.4516	4.65578	3.12838	3.19871
MERGE.16868.8	-4.70192751308666	0.0421235	0.730234	down	13:-:111767609-111797377	MERGE.16868	13:-:111746125-111808993	-	-	-	-	-	-	0	0.53458	0	0.97248	0.4332	0.31193
NONMMUT038533.2	-1.23854842494482	0.0377725	0.730234	down	2:+:92312154-92312843	MERGE.33347	2:+:92312154-92312843	2:+:92312154-92312843	NONMMUG023822.2	-	-	-	lncRNA	2.88436	0.83456	0.84664	3.81169	2.53354	3.10043
MERGE.140.3	-3.82921553680667	0.0305427	0.730234	down	1:-:9563044-9631302	MERGE.140	1:-:9554867-9631302	-	-	-	-	-	-	0.17894	0.00818	0.03591	1.07483	0.96396	0.18017
MERGE.140.1	-1.32580319804294	0.0017632	0.268962	down	1:-:9554867-9631137	MERGE.140	1:-:9554867-9631302	-	-	-	-	-	-	0.96455	0.64319	0.63132	1.90315	1.73974	2.29211
MERGE.55380.5	-5.75397883573065	0.0225934	0.688608	down	8:-:22577092-22593843	MERGE.55380	8:-:22577075-22593843	-	-	-	-	-	-	0.00916	0	1.04806	1.4207	1.17396	0.96376
MERGE.2377.1	-1.73545687994058	0.00695241	0.485499	down	1:-:127566478-127567170	MERGE.2377	1:-:127566478-127567170	-	-	-	-	-	-	1.37164	0.47035	0.91179	3.75704	2.10545	3.16825
MERGE.14927.13	1.423	0.0155047	0.632225	up	13:-:34977757-34994132	MERGE.14927	13:-:34946614-35027096	-	-	-	-	-	-	4.55549	9.46983	4.35479	2.2511	2.09724	2.52832
NONMMUT003918.2	-1.18822776619112	0.0106708	0.572356	down	1:+:176913212-176915666	MERGE.3596	1:+:176913212-176915666	1:+:176913212-176915666	NONMMUG002526.2	-	-	-	lncRNA	0.69573	0.46027	0.34965	1.06054	1.16623	1.31857
NONMMUT019625.2	1.9886	0.00572557	0.449787	up	14:-:8210978-8212084	MERGE.17134	14:-:8210978-8212102	14:-:8210978-8212084	NONMMUG012186.2	-	-	-	lncRNA	0.95628	0.55746	0.57572	0.13296	0.19387	0.18407
MERGE.62878.4	-2.42429732106896	0.0244472	0.699245	down	X:-:57231491-57392981	MERGE.62878	X:-:57231485-57393036	-	-	-	-	-	-	0.10217	0.17563	0.0369	1.16368	0.36927	0.29528
NONMMUT148421.1	-6.03726549600141	0.000186903	0.0781006	down	4:-:18843700-18844086	MERGE.40025	4:-:18843700-18844086	4:-:18843700-18844086	NONMMUG093329.1	-	-	-	lncRNA	0.07676	0	0.06161	2.42471	3.34341	3.63678
MERGE.41142.1	-1.64463098404694	0.0181773	0.654393	down	4:+:82533985-82534794	MERGE.41142	4:+:82533985-82534794	-	-	-	-	-	-	0.29338	0.24144	0.35325	0.76688	0.8157	1.51169
MERGE.10701.1	1.27247	0.0498417	0.730234	up	11:-:105929476-105930176	MERGE.10701	11:-:105929476-105930176	-	-	-	-	-	-	5.42395	1.85991	2.17694	1.80995	1.49234	0.64248
MERGE.918.1	-1.20846289223504	0.0176861	0.650254	down	1:+:55437358-55439123	MERGE.918	1:+:55437358-55439123	-	-	-	-	-	-	4.52465	1.53808	3.19994	5.69518	7.0773	8.48764
NONMMUT024018.2	-3.74851989667393	0.0352607	0.730234	down	15:+:76356976-76359330	MERGE.21306	15:+:76354432-76365201	15:+:76356976-76359330	NONMMUG014835.2	-	-	-	lncRNA	0.50397	0.02169	0.0119	0.96287	0.86546	0.26688
MERGE.10290.1	-9.34125154345141	0.000150355	0.0672524	down	11:-:97136171-97150872	MERGE.10290	11:-:97136171-97151495	-	-	-	-	-	-	0	0	0	1.18605	2.47053	0.40281
NONMMUT134574.1	1.38355	0.0298271	0.729742	up	9:-:65544993-65548390	MERGE.60507	9:-:65544993-65548390	9:-:65544993-65548390	NONMMUG084835.1	-	-	-	lncRNA	2.14611	0.57874	0.97538	0.32671	0.59953	0.42248
MERGE.23043.11	-9.14386216878272	0.0141207	0.617423	down	16:-:22398750-22439570	MERGE.23043	16:-:22381309-22440633	-	-	-	-	-	-	0	0	0	5.34809	0.07159	2.07037
MERGE.15929.1	-6.42460804687293	2.82834e-05	0.0249939	down	13:-:67017330-67017618	MERGE.15929	13:-:67017330-67017618	-	-	-	-	-	-	0	0	0	1.37194	1.90517	2.92201
NONMMUT012452.2	-1.80370166777162	0.00284653	0.335777	down	11:-:107369412-107370863	MERGE.10779	11:-:107369412-107370863	11:-:107369412-107370863	NONMMUG007892.2	-	-	-	lncRNA	0.74671	0.2619	0.47623	1.95697	1.59263	1.47335
NONMMUT063703.2	-1.59839028018553	0.0137318	0.613328	down	7:+:127030816-127035467	MERGE.54334	7:+:127027946-127035467	7:+:127030816-127035467	NONMMUG039342.2	-	-	-	lncRNA	0.33329	0.12191	0.22573	0.52829	0.62743	0.8488
NONMMUT063607.2	4.62415	6.31989e-05	0.04021	up	7:+:125710837-125713306	MERGE.54244	7:+:125707888-125874793	7:+:125710837-125713306	NONMMUG039285.2	-	-	-	lncRNA	2.89229	1.65834	1.51561	0.10702	0.06687	0.06838
MERGE.38590.1	-4.10538501001719	0.0209157	0.675371	down	3:-:107981699-107986421	MERGE.38590	3:-:107981699-108031361	-	-	-	-	-	-	0.04577	0.03767	1.51093	2.07206	6.08709	1.58851
NONMMUT023835.2	1.50544	0.0050507	0.423978	up	15:-:68338295-68341216	MERGE.21094	15:-:68338295-68363176	15:-:68338295-68341216	NONMMUG014726.3	-	-	-	lncRNA	33.1	21.6631	20.5231	8.10986	6.38781	14.0695
NONMMUT039586.2	-1.11132774779789	0.0130273	0.604811	down	2:+:124198153-124202416	MERGE.34089	2:+:124198153-124202416	2:+:124198153-124202416	NONMMUG024483.2	-	-	-	lncRNA	0.48068	0.40769	0.45575	0.84307	0.95231	1.42922
NONMMUT001127.2	5.26092	0.000194716	0.0797426	up	1:+:60152422-60153951	MERGE.1076	1:+:60038911-60153953	1:+:60152422-60153951	NONMMUG000751.2	-	-	-	lncRNA	2.79572	2.21561	2.17404	0.01728	0.11696	0.09199
MERGE.40409.1	-1.09209681633357	0.0402411	0.730234	down	4:-:42823140-42823469	MERGE.40409	4:-:42823140-42823469	-	-	-	-	-	-	3.96061	1.25112	1.9509	5.60696	3.75406	5.03264
NONMMUT067856.2	-6.65161419468158	0.0203247	0.669963	down	9:-:3003316-3014862	MERGE.58457	9:-:3000282-3168181	9:-:3003316-3014862	NONMMUG042010.2	-	-	-	lncRNA	0	0	0	0.034	1.78259	2.65554
MERGE.867.10	2.36065	0.000294475	0.103787	up	1:-:53806990-53978557	MERGE.867	1:-:53806876-54195168	-	-	-	-	-	-	6.32243	7.2842	5.17246	0.92706	1.94355	1.08221
MERGE.867.14	-1.29112756906483	0.0193034	0.660276	down	1:-:53872174-53978553	MERGE.867	1:-:53806876-54195168	-	-	-	-	-	-	2.9017	0.76793	1.44611	3.73037	4.03175	3.8118
NONMMUT101362.1	-1.47641753025366	0.022897	0.689924	down	17:+:69087647-69088500	MERGE.26555	17:+:69087647-69088500	17:+:69087647-69088500	NONMMUG063422.1	-	-	-	lncRNA	0.2087	0.20356	0.26525	0.94403	0.56413	0.54386
NONMMUT113870.1	4.44727	0.00140589	0.236593	up	3:-:115887148-115888120	MERGE.38717	3:-:115881579-115888130	3:-:115887148-115888120	NONMMUG027714.2	-	-	-	lncRNA	0.93113	0.25683	0.49012	0.01358	0.01415	0.01446
NONMMUT115198.1	-1.23092715345246	0.00939441	0.547691	down	4:+:85786499-85788080	MERGE.41263	4:+:85786499-85788080	4:+:85786499-85788080	NONMMUG072233.1	-	-	-	lncRNA	0.86372	0.59751	0.98723	1.78781	1.80109	2.56221
MERGE.29493.1	1.65959	0.011056	0.578932	up	19:-:9836899-9837155	MERGE.29493	19:-:9836899-9837155	-	-	-	-	-	-	4.85444	3.213	2.87616	1.07994	0.8034	1.75245
MERGE.12884.1	-1.19831789606862	0.0123819	0.597114	down	12:+:78364513-78365168	MERGE.12884	12:+:78364513-78365168	-	-	-	-	-	-	3.35082	1.35812	2.28992	6.06423	4.36447	5.72843
NONMMUT086481.1	-2.02108018533192	0.00339605	0.35983	down	12:+:20206508-20207613	MERGE.11768	12:+:20206508-20207613	12:+:20206508-20207613	NONMMUG053856.1	-	-	-	lncRNA	0.63116	0.2063	0.46352	1.51762	1.46859	2.06152
NONMMUT034597.2	1.11953	0.0235527	0.693117	up	19:-:36917556-36918403	MERGE.30200	19:-:36917550-36919615	19:-:36917556-36918403	NONMMUG021272.2	-	-	-	lncRNA	1.71642	1.08906	1.96828	0.76368	0.63305	0.86305
NONMMUT005633.2	-1.2098074465868	0.0220148	0.684182	down	10:-:54007007-54010031	MERGE.5381	10:-:54007007-54010031	10:-:54007007-54010031	NONMMUG003650.2	-	-	-	lncRNA	2.18488	0.78659	1.43066	2.51658	3.21256	4.74573
MERGE.10628.21	2.40528	0.026367	0.709425	up	11:-:103364277-103412687	MERGE.10628	11:-:103331497-103412687	-	-	-	-	-	-	4.23324	4.57987	2.19838	0.5168	0.2469	2.76943
NONMMUT149268.1	1.75825	0.0481624	0.730234	up	5:+:143766311-143768575	MERGE.47143	5:+:143758067-143803114	5:+:143766311-143768575	NONMMUG034255.3	-	-	-	lncRNA	0.4	0.71954	0.84745	0.32676	0.07293	0.31069
MERGE.36862.1	-2.44871728505722	0.00335764	0.357702	down	3:+:47483260-47484367	MERGE.36862	3:+:47483260-47484367	-	-	-	-	-	-	0.60321	0.20593	0.4842	1.41945	3.18033	2.48968
MERGE.5306.1	-1.32182356365757	0.0350359	0.730234	down	10:+:48254760-48255018	MERGE.5306	10:+:48254760-48255018	-	-	-	-	-	-	0.68814	0.4195	0.82857	1.53086	1.70068	1.63023
NONMMUT014704.2	4.37806	0.0267292	0.711563	up	12:+:76332387-76334142	MERGE.12788	12:+:76255108-76334153	12:+:76332387-76334142	NONMMUG009319.2	-	-	-	lncRNA	35.7098	69.88	83.3803	0.80533	0.59575	56.5458
MERGE.56862.1	-1.0176495001992	0.017247	0.646694	down	8:+:77088581-77089587	MERGE.56862	8:+:77088581-77089587	-	-	-	-	-	-	1.38641	0.77684	1.18393	2.23117	2.07772	2.76735
NONMMUT009427.2	-1.01949879203863	0.0106704	0.572356	down	11:+:44646441-44649710	MERGE.8259	11:+:44617317-45008091	11:+:44646441-44649710	NONMMUG005878.2	-	-	-	lncRNA	2.90233	1.36892	1.65889	3.80325	4.03686	4.41168
NONMMUT051905.2	-1.34531298245444	0.0252537	0.702516	down	5:-:34213778-34214319	MERGE.44384	5:-:34211810-34214319	5:-:34213778-34214319	NONMMUG032191.2	-	-	-	lncRNA	0.63439	0.38219	0.38942	1.09583	1.27965	1.23769
NONMMUT074760.2	7.62859	0.0172181	0.64664	up	Y:-:1161073-1162805	MERGE.64391	Y:-:1096861-1245759	Y:-:1161073-1162805	NONMMUG046386.2	-	-	-	lncRNA	17.2177	8.70203	9.17723	11.3861	0	0
NONMMUT122226.1	1.13776	0.0427896	0.730234	up	6:+:48851927-48854248	MERGE.48541	6:+:48851927-48854248	6:+:48851927-48854248	NONMMUG076661.1	-	-	-	lncRNA	1.98926	0.62701	0.93447	0.39843	0.6758	0.4849
MERGE.30087.3	-1.49641504834284	0.00996386	0.560891	down	19:-:31186133-31193573	MERGE.30087	19:-:31178769-31206188	-	-	-	-	-	-	1.96407	3.54379	5.18479	7.58597	9.93565	11.6249
NONMMUT024532.2	1.29576	0.0076986	0.507509	up	15:-:86213778-86214367	MERGE.21863	15:-:86213778-86214367	15:-:86213778-86214367	NONMMUG015170.2	-	-	-	lncRNA	6.04161	7.66075	7.1937	3.76331	2.93962	2.50476
MERGE.29803.1	1.12156	0.0171276	0.645614	up	19:-:23024794-23026521	MERGE.29803	19:-:23024794-23026521	-	-	-	-	-	-	4.75308	2.2824	3.3945	1.54497	1.29046	2.25613
NONMMUT053732.2	-1.36514718657066	0.0405928	0.730234	down	5:-:110057166-110058027	MERGE.45831	5:-:110024106-110072513	5:-:110057166-110058027	NONMMUG033334.2	-	-	-	lncRNA	0.37906	0.15125	0.13831	0.5213	0.6068	0.42452
NONMMUT030701.2	2.13302	0.00574948	0.450529	up	17:+:78918355-78920300	MERGE.26754	17:+:78916500-78920306	17:+:78918355-78920300	NONMMUG018930.2	-	-	-	lncRNA	3.19376	5.98335	6.81563	1.31702	1.01071	1.40251
MERGE.27827.1	-3.68289215161013	0.027653	0.715995	down	18:-:36114017-36114749	MERGE.27827	18:-:36114017-36114749	-	-	-	-	-	-	0.24315	0	0.2765	0.57698	1.27696	1.34407
NONMMUT153467.1	4.55327	0.046801	0.730234	up	9:+:109122412-109128514	MERGE.61707	9:+:109122412-109130660	9:+:109122412-109128514	NONMMUG043979.3	-	-	-	lncRNA	1.77166	0.84385	1.40651	0.50457	0.32478	0
MERGE.51996.7	5.00845	0.0344935	0.730234	up	7:-:30926308-30955906	MERGE.51996	7:-:30926308-30956803	-	-	-	-	-	-	0.73119	1.40409	1.04548	1.49447	0	0
MERGE.31564.1	4.21673	0.0217638	0.681365	up	2:-:25192683-25197041	MERGE.31564	2:-:25192683-25197041	-	-	-	-	-	-	0.84357	11.8078	4.577	0.63945	0.18097	0.06291
MERGE.51996.2	1.36148	0.0325159	0.730234	up	7:-:30926308-30956757	MERGE.51996	7:-:30926308-30956803	-	-	-	-	-	-	5.74756	7.61638	2.62662	2.79832	1.87076	1.56046
MERGE.42529.2	5.86442	0.0268878	0.712923	up	4:-:132826929-132843123	MERGE.42529	4:-:132826929-132843169	-	-	-	-	-	-	1.55078	2.09874	1.4542	2.62195	0	0
NONMMUT027297.2	-2.27654378915907	0.0114966	0.583048	down	16:-:76322175-76324813	MERGE.23953	16:-:76287400-76373827	16:-:76322175-76324813	NONMMUG016947.2	-	-	-	lncRNA	0.5234	0.54346	2.76933	4.8779	4.82997	4.85855
NONMMUT094554.1	-1.65736442290377	0.0109823	0.577736	down	14:-:68453917-68454717	MERGE.19090	14:-:68453917-68454717	14:-:68453917-68454717	NONMMUG059042.1	-	-	-	lncRNA	1.29795	1.93969	0.69955	4.42197	3.60877	4.42788
NONMMUT085622.1	1.72861	0.0451298	0.730234	up	11:-:88322201-88324583	MERGE.10022	11:-:88322201-88324583	11:-:88322201-88324583	NONMMUG053324.1	-	-	-	lncRNA	0.83517	0.18238	0.64038	0.18857	0.15018	0.0945
NONMMUT130084.1	-1.05370681328854	0.046403	0.730234	down	8:-:25239144-25239824	MERGE.55485	8:-:25239144-25239824	8:-:25239144-25239824	NONMMUG081715.1	-	-	-	lncRNA	7.328	2.1379	2.38093	7.64649	7.27659	7.35751
MERGE.13064.1	-1.27298948790423	0.00529995	0.433671	down	12:+:82678687-82681134	MERGE.13064	12:+:82678687-82681134	-	-	-	-	-	-	1.41364	0.67462	0.80358	2.05157	2.54156	2.61019
MERGE.59020.1	-2.18014687059143	0.000134335	0.0615595	down	8:+:122007915-122016595	MERGE.59020	8:+:122007915-122016595	-	-	-	-	-	-	0.82807	0.42554	0.59466	2.46333	3.01587	3.19068
NONMMUT146731.1	7.8332	1.97497e-06	0.00636482	up	2:-:26636788-26640264	MERGE.31676	2:-:26636788-26640264	2:-:26636788-26640264	NONMMUG022369.3	-	-	-	lncRNA	0.96677	0.62586	0.93399	0	0	0
NONMMUT059155.2	-1.0392809422898	0.0175851	0.650254	down	6:+:134112881-134114157	MERGE.50671	6:+:134112881-134114157	6:+:134112881-134114157	NONMMUG036751.2	-	-	-	lncRNA	1.50035	0.74022	1.05497	1.90432	2.41451	2.70025
NONMMUT104717.1	1.17651	0.0247319	0.699903	up	18:-:62144053-62146122	MERGE.28524	18:-:62144027-62150132	18:-:62144053-62146122	NONMMUG020091.2	-	-	-	lncRNA	6.09159	2.04703	4.08924	1.61534	2.1545	1.59101
NONMMUT142208.1	-1.0954613279234	0.0340742	0.730234	down	13:+:17715190-17715900	MERGE.14536	13:+:17715190-17715900	13:+:17715190-17715900	NONMMUG089595.1	-	-	-	lncRNA	0.87735	1.57397	1.157	3.0671	2.47807	2.69214
MERGE.33705.1	-1.62432836706628	0.00405932	0.390153	down	2:+:112566401-112568290	MERGE.33705	2:+:112566401-112568290	-	-	-	-	-	-	0.61295	0.55187	0.78219	1.65729	2.02468	2.9787
NONMMUT104719.1	2.35288	0.0351843	0.730234	up	18:-:62150208-62152195	MERGE.28525	18:-:62150208-62152195	18:-:62150208-62152195	NONMMUG065516.1	-	-	-	lncRNA	3.07804	1.28434	1.66118	0.81107	0.07616	0.92035
MERGE.26712.6	-1.18883649732514	0.00601341	0.458716	down	17:+:78301042-78307747	MERGE.26712	17:+:78200248-78376887	-	-	-	-	-	-	2.02241	0.88175	1.39316	3.54001	3.13375	3.20146
MERGE.50594.20	-5.89138408052924	0.0122312	0.593636	down	6:-:129216351-129235001	MERGE.50594	6:-:129203248-129238725	-	-	-	-	-	-	0	0	0.612	2.3349	0.93601	1.24792
MERGE.62619.3	2.22565	0.0081021	0.520737	up	X:-:21028943-21061994	MERGE.62619	X:-:21028939-21062316	-	-	-	-	-	-	3.99342	2.45752	2.07375	0.33683	0.47359	1.58275
NONMMUT016571.2	-3.06335634034907	0.0461245	0.730234	down	13:-:21721457-21721808	MERGE.14606	13:-:21721457-21721808	13:-:21721457-21721808	NONMMUG010422.2	-	-	-	lncRNA	0	0.49386	0.67739	2.10261	2.65913	1.19952
NONMMUT074036.2	1.07771	0.0283748	0.721601	up	X:+:137083933-137085557	MERGE.63876	X:+:137083933-137085557	X:+:137083933-137085557	NONMMUG045901.2	-	-	-	lncRNA	1.1242	0.79565	0.68231	0.40666	0.33036	0.57163
MERGE.45290.1	9.06509	0.026845	0.712364	up	5:-:88659273-88675670	MERGE.45290	5:-:88659273-88676171	-	-	-	-	-	-	0.15318	23.106	0.71808	0	0	0
MERGE.8618.1	1.17942	0.0219855	0.683727	up	11:+:57537476-57538654	MERGE.8618	11:+:57537476-57538654	-	-	-	-	-	-	2.8596	1.31781	1.19323	0.87437	0.7472	0.69238
MERGE.59089.1	-1.27490763820962	0.0330308	0.730234	down	8:+:122877056-122878536	MERGE.59089	8:+:122877056-122878536	-	-	-	-	-	-	0.79226	0.4255	0.2576	0.88347	1.09673	1.4635
MERGE.2383.1	-1.15747011052395	0.00690123	0.483441	down	1:-:127630474-127642980	MERGE.2383	1:-:127630474-127642980	-	-	-	-	-	-	2.18622	1.22749	1.61288	4.79962	3.01447	3.79119
NONMMUT019334.2	-1.95987104131016	0.00334567	0.356834	down	13:+:112660781-112673685	MERGE.16873	13:+:112660751-112738749	13:+:112660781-112673685	NONMMUG011984.2	-	-	-	lncRNA	0.67674	0.3002	0.3583	2.42802	1.13429	1.84201
NONMMUT075148.1	-2.39617923331891	0.0285148	0.722205	down	1:+:23326638-23327504	MERGE.371	1:+:23326638-23327504	1:+:23326638-23327504	NONMMUG046595.1	-	-	-	lncRNA	0.78801	0.06266	0.6738	2.25609	1.20661	1.85061
NONMMUT073460.2	-1.24499202755211	0.0403859	0.730234	down	X:+:103460442-103468039	MERGE.63461	X:+:103460440-103468973	X:+:103460442-103468039	NONMMUG045570.2	-	-	-	lncRNA	0.83424	0.33406	0.1936	0.91651	0.8721	1.11463
MERGE.27744.13	1.12531	0.0309403	0.730234	up	18:-:34606875-34624601	MERGE.27744	18:-:34597588-34624629	-	-	-	-	-	-	2.12867	0.80855	1.24569	0.57621	0.4932	0.91337
NONMMUT007202.2	-1.04235748922897	0.0327953	0.730234	down	10:-:105556615-105557787	MERGE.6678	10:-:105556615-105557787	10:-:105556615-105557787	NONMMUG004598.2	-	-	-	lncRNA	1.87395	0.78732	0.71147	2.20837	1.95971	2.5197
MERGE.5581.9	-3.3197208695463	0.0288096	0.724224	down	10:-:62832649-62865304	MERGE.5581	10:-:62804570-62908996	-	-	-	-	-	-	1.45209	0.05423	0.0315	0.81099	1.37406	2.04958
MERGE.39276.1	-1.88894549903655	0.00108008	0.212792	down	3:-:136139320-136141539	MERGE.39276	3:-:136139320-136141539	-	-	-	-	-	-	0.6155	0.3328	0.30074	1.4288	1.5129	1.72442
MERGE.58872.1	2.06801	0.0204967	0.671067	up	9:-:21921007-21927462	MERGE.58872	9:-:21921007-21927556	-	-	-	-	-	-	7.83871	9.91843	5.34389	3.52104	0.64306	3.02101
MERGE.25206.1	1.23263	0.0100722	0.562981	up	17:-:25790508-25792284	MERGE.25206	17:-:25790508-25792284	-	-	-	-	-	-	2.53231	1.55091	1.9949	1.00617	1.15708	0.61387
MERGE.51926.1	1.13826	0.0149204	0.626602	up	7:-:30157274-30169691	MERGE.51926	7:-:30157274-30169750	-	-	-	-	-	-	0.88634	0.5669	0.59873	0.37281	0.42868	0.21572
MERGE.7926.1	-2.2969990482341	0.0285883	0.722885	down	11:+:24115403-24115847	MERGE.7926	11:+:24115403-24115847	-	-	-	-	-	-	0.50064	0.09766	0.10717	1.54439	0.8661	0.50604
NONMMUT050113.2	2.14137	0.0204506	0.670781	up	4:+:136343975-136345981	MERGE.42725	4:+:136310942-136359612	4:+:136343975-136345981	NONMMUG031032.3	-	-	-	lncRNA	2.83429	1.62407	1.52071	0.19755	1.46771	0.32959
NONMMUT066821.2	-9.53991612681631	2.07394e-05	0.0205266	down	8:+:95373111-95374293	MERGE.57459	8:+:95352268-95375080	8:+:95373111-95374293	NONMMUG041359.2	-	-	-	lncRNA	0.03766	0.03674	0.03023	32.3092	38.2461	21.5577
MERGE.3536.1	-1.90820020810526	0.0155122	0.632225	down	1:+:173438294-173438814	MERGE.3536	1:+:173438294-173438814	-	-	-	-	-	-	0.28507	0.56306	0.32036	1.14153	2.24571	1.43175
MERGE.39425.5	1.76547	0.020508	0.671067	up	3:-:144685000-144713996	MERGE.39425	3:-:144683678-144720335	-	-	-	-	-	-	10.1271	8.64622	4.22349	4.06265	2.6216	1.02865
NONMMUT004048.2	1.0359	0.0350182	0.730234	up	1:+:180813784-180816688	MERGE.3736	1:+:180813465-180817024	1:+:180813784-180816688	NONMMUG002618.2	-	-	-	lncRNA	1.22193	0.5498	0.66895	0.58234	0.34116	0.31007
MERGE.46374.22	2.48863	0.00670648	0.478219	up	5:-:122807329-122821275	MERGE.46374	5:-:122781404-122821339	-	-	-	-	-	-	1.21635	1.52204	0.8993	0.41301	0.22249	0.10616
MERGE.54026.1	1.43361	0.0215289	0.679548	up	7:-:116598175-116598495	MERGE.54026	7:-:116598175-116598495	-	-	-	-	-	-	4.44181	8.83416	6.57389	2.5527	2.83016	2.19227
MERGE.6572.9	-5.0438397000573	0.0177294	0.650528	down	10:-:95388354-95416845	MERGE.6572	10:-:95381576-95417559	-	-	-	-	-	-	0	0.65783	0.94394	5.69809	7.61052	6.16162
MERGE.6572.5	8.44755	0.00126192	0.224274	up	10:-:95384811-95416798	MERGE.6572	10:-:95381576-95417559	-	-	-	-	-	-	3.30012	2.52332	1.60447	0	0	0.13811
MERGE.22544.1	-6.35241156965341	0.0158275	0.635036	down	16:-:5013904-5049857	MERGE.22544	16:-:5013904-5049863	-	-	-	-	-	-	0	0.25026	0	0.47355	0.70458	1.67006
NONMMUT026613.2	-6.56952974557003	0.000200204	0.0810207	down	16:+:40354334-40357082	NONMMUG016489.2	16:+:40354334-40357082	16:+:40354334-40357082	NONMMUG016489.2	-	-	-	lncRNA	0	0.0079	0.00867	0.48558	0.46067	0.83965
MERGE.39968.1	1.28742	0.00367082	0.371387	up	4:-:12136998-12137643	MERGE.39968	4:-:12136998-12137643	-	-	-	-	-	-	4.6902	3.43105	3.69106	1.55487	1.85378	1.72117
MERGE.7432.1	-3.29683122946242	0.0307307	0.730234	down	11:-:3415382-3452358	MERGE.7432	11:-:3415382-3452363	-	-	-	-	-	-	0.50347	0.13569	0.31197	13.8491	1.56763	0.99186
MERGE.63387.1	-5.51553281964674	0.000326571	0.109957	down	X:-:100864662-100864862	MERGE.63387	X:-:100864662-100864862	-	-	-	-	-	-	0	0.05405	0.11863	2.1041	2.87624	4.48138
NONMMUT000162.2	1.30304	0.0242806	0.698557	up	1:+:11289277-11299594	MERGE.192	1:+:10362297-11716147	1:+:11289277-11299594	NONMMUG000107.2	-	-	-	lncRNA	9.15289	14.9837	17.4973	4.20926	4.70472	9.58455
NONMMUT007642.2	4.1605	0.0222058	0.685333	up	10:+:119462350-119464531	MERGE.6980	10:+:119462350-119464531	10:+:119462350-119464531	NONMMUG004842.2	-	-	-	lncRNA	0.95294	0.49794	0.81411	0.75713	0.00631	0.00645
MERGE.59069.6	-7.35213071302343	0.0234741	0.693117	down	8:-:122626313-122679037	MERGE.59069	8:-:122624574-122699109	-	-	-	-	-	-	0.00457	6.9653	0	6.64277	7.53892	7.00253
NONMMUT004210.2	-2.48264803579659	0.0411976	0.730234	down	1:+:185408441-185410199	MERGE.3877	1:+:185363044-185428360	1:+:185408441-185410199	NONMMUG002729.2	-	-	-	lncRNA	0.06755	0.02471	0.21011	0.45082	0.21129	0.88015
NONMMUT015445.2	1.24696	0.0206941	0.673178	up	12:-:101968105-101976448	MERGE.13604	12:-:101968090-101977068	12:-:101968105-101976448	NONMMUG009797.2	-	-	-	lncRNA	2.65627	2.8834	2.91175	2.12225	1.09854	0.85258
NONMMUT057012.2	1.57183	0.0165635	0.640501	up	6:+:53573372-53682309	MERGE.48677	6:+:53287270-53700376	6:+:53573372-53682309	NONMMUG035386.2	-	-	-	lncRNA	1.51265	0.46592	0.70297	0.30699	0.28694	0.22633
NONMMUT000103.2	-4.52809634736736	0.0494894	0.730234	down	1:-:9601018-9631175	MERGE.140	1:-:9554867-9631302	1:-:9601018-9631175	NONMMUG000073.2	-	-	-	lncRNA	0	0	0	1.15118	1.24506	0
MERGE.34427.1	-1.60200727566734	0.00614716	0.459709	down	2:+:134835513-134839911	MERGE.34427	2:+:134835513-134839911	-	-	-	-	-	-	1.55309	1.17319	0.78867	2.37348	4.13353	5.06152
NONMMUT074757.2	6.13709	0.0159017	0.635641	up	Y:-:1085567-1090786	MERGE.64389	Y:-:1085567-1090786	Y:-:1085567-1090786	NONMMUG046384.2	-	-	-	lncRNA	1.19082	0.58612	0.54226	0.60392	0	0
MERGE.19979.3	10.3884	5.08498e-07	0.00365663	up	15:-:7873061-8098996	MERGE.19979	15:-:7873055-8099209	-	-	-	-	-	-	5.50539	3.1131	4.80086	0	0	0
MERGE.19979.1	-2.26113918010575	0.0201117	0.667446	down	15:-:7873055-8099197	MERGE.19979	15:-:7873055-8099209	-	-	-	-	-	-	0.61774	2.7454	0.3839	4.11978	4.56162	4.89077
MERGE.60414.1	-1.82067198592691	0.043605	0.730234	down	9:-:63953076-64022032	MERGE.60414	9:-:63953076-64022059	-	-	-	-	-	-	4.42453	24.2373	24.3403	32.7221	70.9132	52.6557
NONMMUT059746.2	1.72975	0.045185	0.730234	up	7:-:4134741-4136842	MERGE.51105	7:-:4126340-4136926	7:-:4134741-4136842	NONMMUG037106.2	-	-	-	lncRNA	0.60766	0.42385	0.57285	0.43384	0.05239	0.18748
NONMMUT139194.1	1.28608	0.0249443	0.701107	up	1:-:156424622-156425149	MERGE.3045	1:-:156424525-156474493	1:-:156424622-156425149	NONMMUG087958.1	-	-	-	lncRNA	13.5021	7.46969	13.1866	8.53559	3.0241	4.34492
MERGE.43706.1	-1.10700817583102	0.00660934	0.475344	down	5:+:9161778-9164456	MERGE.43706	5:+:9161778-9164456	-	-	-	-	-	-	2.08453	1.22885	1.16151	2.99947	3.67372	3.38331
NONMMUT001329.2	1.38007	0.0108715	0.57616	up	1:+:66772173-66774078	MERGE.1241	1:+:66772173-66774078	1:+:66772173-66774078	NONMMUG000900.2	-	-	-	lncRNA	3.86502	1.63602	2.44573	0.8945	0.83051	1.47685
NONMMUT019073.2	-1.42407046095492	0.0448799	0.730234	down	13:+:107482529-107491267	MERGE.16812	13:+:107469822-107491267	13:+:107482529-107491267	NONMMUG056483.2	-	-	-	lncRNA	0.53234	0.15577	0.09615	0.59608	0.63726	0.43299
NONMMUT025580.2	1.55806	0.00370365	0.372388	up	16:-:13831237-13833925	MERGE.22703	16:-:13831237-13903131	16:-:13831237-13833925	NONMMUG015835.2	-	-	-	lncRNA	2.2701	1.39398	1.87988	0.45218	0.84463	0.76417
NONMMUT083642.1	1.68192	0.0112398	0.579911	up	11:+:51922236-51923465	MERGE.8457	11:+:51922236-51923465	11:+:51922236-51923465	NONMMUG052082.1	-	-	-	lncRNA	1.58183	0.54767	0.88204	0.34384	0.29096	0.24029
NONMMUT150285.1	-1.58085163488388	0.00452084	0.40952	down	6:-:28209926-28215778	MERGE.47770	6:-:28209926-28215778	6:-:28209926-28215778	NONMMUG094458.1	-	-	-	lncRNA	0.32988	0.33971	0.18943	1.01387	0.70553	0.99792
MERGE.64391.8	5.75352	0.0198118	0.665017	up	Y:-:1127155-1245718	MERGE.64391	Y:-:1096861-1245759	-	-	-	-	-	-	3.95318	1.9978	2.84672	2.67098	0.00656	0.0067
MERGE.7880.1	1.42993	0.025812	0.706172	up	11:+:23012544-23013209	MERGE.7880	11:+:23012544-23013209	-	-	-	-	-	-	2.76529	1.58244	1.71851	0.47627	0.66138	1.43702
MERGE.24186.3	1.1635	0.023237	0.692731	up	16:-:90776111-90780323	MERGE.24186	16:-:90751527-90810413	-	-	-	-	-	-	3.69427	1.39405	2.80442	1.00406	1.09995	1.45733
NONMMUT122573.1	-1.05670320442759	0.00758291	0.504718	down	6:+:86503553-86504763	MERGE.49354	6:+:86503553-86504763	6:+:86503553-86504763	NONMMUG076892.1	-	-	-	lncRNA	1.484	1.19327	1.14201	2.84846	3.04623	2.61497
MERGE.47473.23	-7.03607270954196	0.0309217	0.730234	down	6:+:5138903-5157119	MERGE.47473	6:+:4902581-5165661	-	-	-	-	-	-	0	0	0.656	0.57264	0.74459	3.63643
NONMMUT022925.2	-1.24585418168597	0.00549368	0.440087	down	15:+:25690542-25693465	MERGE.20186	15:+:25690542-25693465	15:+:25690542-25693465	NONMMUG014178.2	-	-	-	lncRNA	2.45845	1.30796	2.09168	3.72446	5.33836	5.61722
MERGE.29272.6	-9.11394710192523	5.61309e-05	0.037215	down	19:-:5710687-5726112	MERGE.29272	19:-:5707376-5726317	-	-	-	-	-	-	0	0	0	2.97732	0.72102	1.16513
MERGE.29272.1	1.82863	0.0389402	0.730234	up	19:-:5707376-5726317	MERGE.29272	19:-:5707376-5726317	-	-	-	-	-	-	0.47463	0.51007	0.70467	0.05233	0.28807	0.30648
NONMMUT022984.2	-1.92766279901785	0.00512755	0.425514	down	15:+:30203443-30205024	MERGE.20385	15:+:30203443-30205024	15:+:30203443-30205024	NONMMUG014214.2	-	-	-	lncRNA	0.52574	0.1923	0.2713	1.29491	0.82659	1.58359
NONMMUT141730.1	1.41622	0.00575724	0.450571	up	12:-:8913953-8921459	MERGE.11564	12:-:8912435-8922286	12:-:8913953-8921459	NONMMUG054741.2	-	-	-	lncRNA	1.27611	0.56011	1.01164	0.44894	0.34105	0.30747
MERGE.46770.1	-1.27137789303076	0.0181798	0.654393	down	5:-:135543327-135544589	MERGE.46770	5:-:135543327-135544589	-	-	-	-	-	-	2.97516	0.89466	1.11387	3.92411	3.46574	3.72196
NONMMUT073970.2	-5.2150773389616	0.0223161	0.686766	down	X:-:136041239-136050649	MERGE.63821	X:-:136041239-136051331	X:-:136041239-136050649	NONMMUG045868.2	-	-	-	lncRNA	0.01052	0	1.96732	2.39617	2.01794	1.70447
NONMMUT134038.1	-5.31271079850867	0.0139289	0.61557	down	9:-:30985443-30986971	MERGE.59392	9:-:30954087-31031205	9:-:30985443-30986971	NONMMUG084482.2	-	-	-	lncRNA	0.7057	0	0	0.94679	1.31813	0.72018
NONMMUT141502.1	7.23555	0.0105985	0.572356	up	12:+:80113593-80120537	MERGE.12955	12:+:80113593-80120537	12:+:80113593-80120537	NONMMUG009394.3	-	-	-	lncRNA	1.91615	1.03722	0.92356	0	0	0.77819
MERGE.59545.12	-1.17541288674944	0.0148393	0.625409	down	9:-:36907158-37085641	MERGE.59545	9:-:36890982-37147407	-	-	-	-	-	-	1.5176	0.57391	1.24745	2.84012	2.4534	2.16935
NONMMUT077274.1	-2.27397830879285	0.0353386	0.730234	down	1:-:6201940-6203356	MERGE.20	1:-:6196344-6203804	1:-:6201940-6203356	NONMMUG047931.1	-	-	-	lncRNA	0.24107	0.50606	0.05048	0.89539	0.72856	1.32102
MERGE.15447.5	4.25021	0.028284	0.720557	up	13:-:55028395-55100295	MERGE.15447	13:-:55027880-55100300	-	-	-	-	-	-	0.97031	0.11696	0.79215	0.01962	0.02555	0.0209
MERGE.15447.6	-1.0995431637879	0.0216001	0.68047	down	13:-:55028410-55100295	MERGE.15447	13:-:55027880-55100300	-	-	-	-	-	-	1.975	2.93617	1.59814	5.74718	4.3841	4.49021
MERGE.60665.1	-8.9164538872937	6.18743e-07	0.00398912	down	9:+:70539089-70540518	MERGE.60665	9:+:70539089-70540518	-	-	-	-	-	-	0	0	0	2.46768	2.19468	2.19481
MERGE.26774.2	3.16368	0.0430155	0.730234	up	17:-:79848392-79896111	MERGE.26774	17:-:79848390-79933339	-	-	-	-	-	-	3.17864	0.36217	2.9306	0.03389	0.46118	0.36329
NONMMUT052575.2	-1.01037121732836	0.010513	0.570313	down	5:-:66531797-66534078	MERGE.44940	5:-:66531796-66534161	5:-:66531797-66534078	NONMMUG032640.2	-	-	-	lncRNA	2.88975	1.89495	1.65614	4.18152	4.10775	5.3781
MERGE.7664.1	1.41892	0.0158063	0.634993	up	11:-:14101402-14106983	MERGE.7664	11:-:14101402-14106983	-	-	-	-	-	-	2.42926	1.25545	1.24091	0.37883	0.69046	0.96065
NONMMUT136859.1	3.67902	0.0278106	0.717081	up	X:-:38524315-38525813	MERGE.62717	X:-:38524315-38528384	X:-:38524315-38525813	NONMMUG044730.2	-	-	-	lncRNA	0.68366	0.63784	0.27837	0.12344	0.11019	0
MERGE.25711.2	-7.69564611971252	0.0307261	0.730234	down	17:-:35149088-35164897	MERGE.25711	17:-:35149076-35164897	-	-	-	-	-	-	0.00216	0.07272	0	0.32305	2.07685	4.80407
MERGE.40890.1	-1.44930470408258	0.0307689	0.730234	down	4:+:59676232-59677061	MERGE.40890	4:+:59676232-59677061	-	-	-	-	-	-	1.71785	0.75924	0.47401	3.26429	1.59208	2.764
MERGE.25624.2	-4.44402439007263	0.0170789	0.645614	down	17:-:34182030-34187342	MERGE.25624	17:-:34181988-34187764	-	-	-	-	-	-	0.36505	0.00763	0	0.79818	0.64765	0.31628
MERGE.36652.1	-1.30605961315275	0.04149	0.730234	down	3:+:32908212-32909335	MERGE.36652	3:+:32908212-32909335	-	-	-	-	-	-	0.52855	0.50265	0.44549	1.2699	0.78377	2.2539
MERGE.25472.5	1.35668	0.015571	0.632225	up	17:-:31845037-31849837	MERGE.25472	17:-:31812997-31855792	-	-	-	-	-	-	21.1989	7.63446	17.6752	5.20085	5.6739	6.51311
MERGE.2378.1	-1.39621470984065	0.00595369	0.458101	down	1:-:127571780-127576561	MERGE.2378	1:-:127571780-127576561	-	-	-	-	-	-	1.41007	0.60891	0.90251	3.38839	2.42944	2.08967
MERGE.42971.1	-1.01571757790767	0.0361686	0.730234	down	4:-:143977064-143977802	MERGE.42971	4:-:143977064-143977802	-	-	-	-	-	-	1.10538	0.91154	0.77437	1.50227	2.01165	2.60918
NONMMUT131557.1	4.38561	0.00470962	0.413963	up	8:-:106825968-106829943	MERGE.57699	8:-:106825968-106893601	8:-:106825968-106829943	NONMMUG041496.2	-	-	-	lncRNA	0.59282	0.35623	0.62033	0.03768	0.07849	0
MERGE.29807.1	1.05366	0.0466062	0.730234	up	19:-:23028883-23029741	MERGE.29807	19:-:23028883-23029741	-	-	-	-	-	-	3.75197	1.25219	2.91461	1.29241	1.1217	1.24523
MERGE.10417.9	1.20377	0.0326358	0.730234	up	11:-:100140810-100148665	MERGE.10417	11:-:100117327-100148665	-	-	-	-	-	-	4.37262	7.92671	9.70185	3.60669	3.78175	2.43079
MERGE.32045.2	6.8141	0.0158766	0.635633	up	2:-:34849843-34870933	MERGE.32045	2:-:34849734-34874968	-	-	-	-	-	-	1.08305	1.66646	2.04595	0	0	1.3308
NONMMUT032720.2	-1.26208002870852	0.0223997	0.687601	down	18:-:66222020-66226853	MERGE.28618	18:-:66222020-66226853	18:-:66222020-66226853	NONMMUG020158.2	-	-	-	lncRNA	1.24128	0.39558	0.44147	1.29594	1.92492	1.50235
NONMMUT111108.1	-1.10955012405691	0.0196016	0.66296	down	3:+:53109668-53110123	MERGE.36959	3:+:53109668-53110123	3:+:53109668-53110123	NONMMUG069501.1	-	-	-	lncRNA	5.27647	1.97762	2.9021	6.72413	6.42965	8.48782
MERGE.10753.1	10.1459	2.15689e-06	0.00642835	up	11:-:107166663-107189313	MERGE.10753	11:-:107166663-107189381	-	-	-	-	-	-	2.87855	3.03304	1.62556	0	0	0
NONMMUT142144.1	-2.39873574582644	0.0250189	0.702253	down	13:+:3004647-3005066	NONMMUG089572.1	13:+:3004647-3005066	13:+:3004647-3005066	NONMMUG089572.1	-	-	-	lncRNA	0.2829	0.05174	0.05677	0.62935	0.45883	0.46914
MERGE.57702.1	1.002	0.0319861	0.730234	up	8:-:106861760-106862743	MERGE.57702	8:-:106861760-106862743	-	-	-	-	-	-	5.55451	2.12	3.38036	1.57146	1.95842	1.98814
NONMMUT089399.1	-2.59208063834172	0.0228731	0.689839	down	13:+:24572039-24572873	NONMMUG055696.1	13:+:24572039-24572873	13:+:24572039-24572873	NONMMUG055696.1	-	-	-	lncRNA	0.46247	0.02602	0.05711	0.47484	0.74182	0.52252
NONMMUT021957.2	-1.78288316577575	0.00528557	0.433383	down	14:-:97998982-98000303	MERGE.19477	14:-:97998982-98000303	14:-:97998982-98000303	NONMMUG013635.2	-	-	-	lncRNA	2.7188	0.98623	1.27157	4.10888	5.07072	8.31472
MERGE.17432.7	-1.20509970802829	0.0177148	0.65045	down	14:-:18586888-18628371	MERGE.17432	14:-:18573575-18894267	-	-	-	-	-	-	1.21195	0.74751	1.3162	2.15692	2.46667	3.35532
MERGE.21219.27	2.13399	0.0415355	0.730234	up	15:-:75131198-75134934	MERGE.21219	15:-:75044018-75135167	-	-	-	-	-	-	0.52834	0.90184	1.23698	0.60075	0.16322	0.06954
NONMMUT076379.1	2.06675	0.0212133	0.676911	up	1:+:134099443-134100101	NONMMUG047381.1	1:+:134099443-134100101	1:+:134099443-134100101	NONMMUG047381.1	-	-	-	lncRNA	0.87897	0.3792	1.06738	0.14039	0.20888	0.1495
MERGE.14609.1	-1.11691821762515	0.0114008	0.581247	down	13:-:21748325-21749801	MERGE.14609	13:-:21748325-21749801	-	-	-	-	-	-	0.78435	0.64734	0.50046	1.59277	1.33269	1.50558
NONMMUT103363.1	1.58506	0.0354615	0.730234	up	18:+:36341636-36342715	MERGE.27848	18:+:36336317-36343140	18:+:36341636-36342715	NONMMUG019673.2	-	-	-	lncRNA	1.05891	0.42253	1.1039	0.46502	0.25491	0.15638
NONMMUT037084.2	-1.16230520079693	0.0332164	0.730234	down	2:+:43819335-43820961	MERGE.32249	2:+:43819335-43820961	2:+:43819335-43820961	NONMMUG022843.2	-	-	-	lncRNA	1.13195	0.54759	0.48363	1.08038	1.99663	1.88581
MERGE.1260.1	-1.23445690121414	0.0388387	0.730234	down	1:-:69604645-69605466	MERGE.1260	1:-:69604645-69605466	-	-	-	-	-	-	1.40934	0.54193	0.46412	1.60783	1.37314	2.34572
NONMMUT098381.1	-6.96822513226989	0.000735156	0.177584	down	16:+:40058407-40062168	NONMMUG016479.2	16:+:40057040-40063476	16:+:40058407-40062168	NONMMUG016479.2	-	-	-	lncRNA	0	0	0.01901	0.32672	0.39516	0.90537
MERGE.8852.1	1.04765	0.035931	0.730234	up	11:+:61631154-61633126	MERGE.8852	11:+:61631154-61633126	-	-	-	-	-	-	4.38869	1.59698	3.61954	1.33303	1.57672	1.71917
MERGE.37952.1	2.25318	0.00215039	0.294497	up	3:-:90488026-90490965	MERGE.37952	3:-:90488026-90491033	-	-	-	-	-	-	1.47622	1.12554	1.06259	0.3207	0.43035	0.13135
MERGE.19905.1	-1.28293778664627	0.0201337	0.667672	down	15:+:5561613-5563387	MERGE.19905	15:+:5561613-5563387	-	-	-	-	-	-	0.60246	0.53866	0.49032	1.15411	1.10119	2.27568
NONMMUT070138.2	1.32373	0.016197	0.637765	up	9:-:78376116-78377442	NONMMUG043419.2	9:-:78376116-78377442	9:-:78376116-78377442	NONMMUG043419.2	-	-	-	lncRNA	0.67154	0.49126	0.49414	0.26891	0.17634	0.23333
NONMMUT027254.2	-1.09921051515157	0.00890084	0.53839	down	16:-:74328049-74333065	MERGE.23903	16:-:74328049-74333065	16:-:74328049-74333065	NONMMUG016916.2	-	-	-	lncRNA	1.70815	0.88141	1.18817	2.33928	2.6339	3.54594
MERGE.48816.1	-1.24245796369875	0.0117625	0.587317	down	6:+:58881321-58882948	MERGE.48816	6:+:58881321-58882948	-	-	-	-	-	-	1.04003	0.60732	0.79823	1.50998	1.98695	2.76646
MERGE.11734.1	-7.32497022506066	8.12612e-05	0.0458268	down	12:-:19856561-19857632	MERGE.11734	12:-:19856561-19857632	-	-	-	-	-	-	0	0.02027	0.02224	3.3041	1.83617	2.49452
NONMMUT106753.1	1.29374	0.0148549	0.625537	up	2:+:25463210-25468343	MERGE.31608	2:+:25463210-25468343	2:+:25463210-25468343	NONMMUG066722.1	-	-	-	lncRNA	0.96952	0.633	0.70473	0.56766	0.24585	0.25138
NONMMUT046133.2	-1.04391658115514	0.0146512	0.625208	down	4:-:9536297-9540649	MERGE.39890	4:-:9448069-9669344	4:-:9536297-9540649	NONMMUG028485.2	-	-	-	lncRNA	0.44697	0.26457	0.30675	0.58294	0.80319	0.84065
MERGE.59628.1	-1.02211582050374	0.00600599	0.458716	down	9:-:40396556-40398356	MERGE.59628	9:-:40396556-40398356	-	-	-	-	-	-	2.15239	1.68314	1.84029	3.96272	3.76031	4.7201
MERGE.1210.2	7.53968	0.00409022	0.390396	up	1:-:65158616-65186479	MERGE.1210	1:-:65158616-65186500	-	-	-	-	-	-	9.79671	5.99402	11.8578	0	0.02857	1.66508
NONMMUT004965.2	-1.17869223540207	0.0326867	0.730234	down	10:-:22132130-22133490	MERGE.4729	10:-:22132130-22133490	10:-:22132130-22133490	NONMMUG003189.2	-	-	-	lncRNA	0.50199	0.33529	0.21024	0.96137	0.8091	0.59979
MERGE.3367.4	1.16295	0.0477338	0.730234	up	1:-:168153861-168431750	MERGE.3367	1:-:168119364-168432270	-	-	-	-	-	-	1.85193	0.45573	0.80011	0.41577	0.44352	0.40251
NONMMUT114394.1	3.45475	0.000292331	0.103712	up	3:-:149285597-149286632	MERGE.39505	3:-:148815583-149445439	3:-:149285597-149286632	NONMMUG028231.2	-	-	-	lncRNA	1.76335	1.04875	1.27737	0.11481	0.11958	0.12227
NONMMUT115240.1	-1.29618983494706	0.011945	0.58999	down	4:+:85881823-85883016	MERGE.41302	4:+:85881823-85883016	4:+:85881823-85883016	NONMMUG072270.1	-	-	-	lncRNA	0.84586	0.35489	0.45931	1.15118	1.44105	1.41451
NONMMUT039665.2	1.06028	0.0401936	0.730234	up	2:-:126845465-127146282	MERGE.34143	2:-:126695074-127146282	2:-:126845465-127146282	NONMMUG092488.1	-	-	-	lncRNA	1.18786	0.60295	0.74594	0.64716	0.38194	0.26801
MERGE.50188.18	5.0241	0.038428	0.730234	up	6:-:119364022-119388329	MERGE.50188	6:-:119353150-119417704	-	-	-	-	-	-	7.25408	3.08127	4.23186	3.45415	0	0.27392
MERGE.19092.1	-1.44203665274814	0.0171023	0.645614	down	14:-:68458906-68460476	MERGE.19092	14:-:68458906-68460476	-	-	-	-	-	-	0.79414	1.32787	0.5464	2.09477	2.46208	2.89371
MERGE.15484.1	-1.04471501571797	0.0197344	0.663933	down	13:-:55559698-55563542	MERGE.15484	13:-:55559698-55563542	-	-	-	-	-	-	1.96978	0.79344	0.9974	3.0286	2.44178	2.26434
NONMMUT131716.1	-1.10078231999668	0.012811	0.603344	down	8:-:115553718-115556321	MERGE.58252	8:-:115553718-115556321	8:-:115553718-115556321	NONMMUG082898.1	-	-	-	lncRNA	0.39926	0.36717	0.34338	0.71056	0.94092	0.94045
MERGE.43552.3	2.12838	0.0399505	0.730234	up	4:-:156164859-156193617	MERGE.43552	4:-:156164783-156197488	-	-	-	-	-	-	1.7318	6.39169	1.73187	1.30164	0.23357	0.87299
MERGE.43552.4	1.62079	0.00650536	0.473384	up	4:-:156164859-156180483	MERGE.43552	4:-:156164783-156197488	-	-	-	-	-	-	8.12224	8.50878	4.92336	3.53957	1.4699	2.51715
MERGE.30925.2	10.9224	3.62648e-07	0.0035216	up	19:-:60761116-60790693	MERGE.30925	19:-:60761116-60790693	-	-	-	-	-	-	2.65219	1.87298	2.95675	0	0	0
MERGE.5514.3	1.47332	0.0214157	0.678418	up	10:-:61319656-61350197	MERGE.5514	10:-:61319656-61383530	-	-	-	-	-	-	4.36241	6.75606	8.10086	4.3363	1.62093	1.80978
NONMMUT130039.1	-1.26942392718694	0.0370243	0.730234	down	8:-:20260703-20261595	MERGE.55408	8:-:20257553-20550480	8:-:20260703-20261595	NONMMUG040028.2	-	-	-	lncRNA	0.18295	0.27984	0.36047	0.6512	0.72447	0.70923
MERGE.29855.1	1.81267	0.000828185	0.191508	up	19:-:23968194-23972413	MERGE.29855	19:-:23968194-23972413	-	-	-	-	-	-	2.38622	1.53449	2.19514	0.55747	0.80893	0.50694
MERGE.50631.2	2.23673	0.0198609	0.665464	up	6:-:129375515-129416717	MERGE.50631	6:-:129375515-129452000	-	-	-	-	-	-	0.60009	1.05436	1.31608	0.37189	0.34263	0.07108
MERGE.56431.1	-1.54389148150043	0.0125309	0.598816	down	8:+:66431756-66432429	MERGE.56431	8:+:66431756-66432429	-	-	-	-	-	-	1.91714	0.83825	1.14976	2.76485	3.30847	5.99308
MERGE.34746.1	1.83144	0.00762603	0.50543	up	2:-:148319895-148322996	MERGE.34746	2:-:148319895-148322996	-	-	-	-	-	-	3.32285	1.34149	2.14844	0.99698	0.35056	0.74864
MERGE.60505.1	2.72145	0.00776887	0.509433	up	9:-:65542200-65543344	MERGE.60505	9:-:65542200-65543344	-	-	-	-	-	-	3.43743	0.72117	1.46814	0.20777	0.19235	0.31959
NONMMUT108502.1	1.72574	0.00733247	0.497254	up	2:+:173280192-173283362	MERGE.35648	2:+:173280192-173283362	2:+:173280192-173283362	NONMMUG067820.1	-	-	-	lncRNA	0.82451	0.46459	0.53663	0.1983	0.22718	0.1267
MERGE.60058.3	-7.12471096037707	0.0476637	0.730234	down	9:-:53437350-53536608	MERGE.60058	9:-:53437122-53536740	-	-	-	-	-	-	0	3.75311	0	2.77584	0.76634	3.98364
MERGE.7149.1	-1.28265325180697	0.0419939	0.730234	down	10:+:122883188-122883671	MERGE.7149	10:+:122883188-122883671	-	-	-	-	-	-	1.5957	0.40407	1.18236	1.96608	2.33207	2.64621
MERGE.10852.1	-1.15259451832923	0.0291124	0.724944	down	11:-:108267044-108271143	MERGE.10852	11:-:108267044-108271143	-	-	-	-	-	-	4.90125	1.4893	2.08783	4.73212	6.03976	7.19165
NONMMUT070464.2	-1.3716184113149	0.026724	0.711563	down	9:+:94723500-94725762	MERGE.61177	9:+:94723500-94725762	9:+:94723500-94725762	NONMMUG043615.2	-	-	-	lncRNA	0.39379	0.20165	0.12117	0.45554	0.60826	0.68413
NONMMUT022442.2	-1.17569970977153	0.0130381	0.604811	down	14:+:119679682-119681931	MERGE.19754	14:+:119679682-119681931	14:+:119679682-119681931	NONMMUG013838.2	-	-	-	lncRNA	0.54788	0.23662	0.4292	0.87522	0.91766	0.94454
MERGE.24177.1	-2.97894111391925	0.0120215	0.590622	down	16:-:90681184-90681798	MERGE.24177	16:-:90681184-90681798	-	-	-	-	-	-	0.3864	0.07067	0.23263	0.79513	1.92485	2.49448
NONMMUT031472.2	-7.20745159390208	0.0229956	0.691225	down	18:+:10813982-10817750	MERGE.27296	18:+:10725548-10818704	18:+:10813982-10817750	NONMMUG019341.2	-	-	-	lncRNA	21.2361	0.05477	0.00316	17.4033	13.9219	20.5196
MERGE.4542.4	-1.25008027084261	0.0451146	0.730234	down	10:-:13207424-13295138	MERGE.4542	10:-:13207331-13474442	-	-	-	-	-	-	4.15917	3.83442	14.4551	11.9277	15.6793	17.495
NONMMUT086484.1	-1.97068423411372	0.00743923	0.500531	down	12:+:20211587-20212424	MERGE.11770	12:+:20211587-20212424	12:+:20211587-20212424	NONMMUG053858.1	-	-	-	lncRNA	0.17723	0.12965	0.14227	0.7728	0.57491	0.50385
NONMMUT081473.1	-10.0184146276075	3.10824e-06	0.0071397	down	10:-:9344529-9358978	MERGE.4406	10:-:9344529-9358978	10:-:9344529-9358978	NONMMUG050698.1	-	-	-	lncRNA	0	0	0	0.32012	0.54774	0.66719
MERGE.49774.1	-1.02169306505057	0.0276588	0.716046	down	6:-:97473203-97475399	MERGE.49774	6:-:97473203-97475399	-	-	-	-	-	-	4.0832	1.79023	1.64967	4.60799	4.45463	6.09867
NONMMUT123057.1	1.98722	0.00622775	0.461556	up	6:+:127815214-127816425	MERGE.50513	6:+:127815214-127816425	6:+:127815214-127816425	NONMMUG077180.1	-	-	-	lncRNA	1.72787	0.64545	1.20992	0.2399	0.40886	0.23225
MERGE.64426.1	-6.29184550837782	1.0591e-05	0.0134882	down	Y:+:43265553-43265763	MERGE.64426	Y:+:43265553-43265763	-	-	-	-	-	-	0	0	0	2.63075	2.08757	2.66812
NONMMUT141784.1	1.6343	0.000865227	0.195609	up	12:-:24635611-24638019	MERGE.11876	12:-:24635611-24638019	12:-:24635611-24638019	NONMMUG089376.1	-	-	-	lncRNA	1.96674	1.29893	1.4847	0.54863	0.50283	0.56087
NONMMUT042108.2	-1.14025237018211	0.044276	0.730234	down	3:-:10349040-10350568	MERGE.36128	3:-:10339953-10351317	3:-:10349040-10350568	NONMMUG026066.2	-	-	-	lncRNA	1.02965	0.41215	0.35868	0.95082	1.18834	1.66609
MERGE.45697.13	-6.32885773062704	0.0238058	0.694368	down	5:-:105078839-105274360	MERGE.45697	5:-:105014060-105346601	-	-	-	-	-	-	0	0	3.27859	2.25505	2.97666	5.85844
MERGE.6493.1	1.38021	0.0393238	0.730234	up	10:-:93585942-93587964	MERGE.6493	10:-:93585942-93587964	-	-	-	-	-	-	1.93821	0.6982	0.80738	0.7905	0.35382	0.25046
NONMMUT063667.2	-1.09418498338629	0.0439901	0.730234	down	7:-:126807694-126809129	MERGE.54306	7:-:126800790-126809129	7:-:126807694-126809129	NONMMUG039320.2	-	-	-	lncRNA	1.41192	0.75479	0.54489	1.54634	1.91249	2.18705
NONMMUT001107.2	1.93644	0.022435	0.687601	up	1:+:59716538-59719044	MERGE.1028	1:+:59684971-59719044	1:+:59716538-59719044	NONMMUG000736.2	-	-	-	lncRNA	0.69315	0.50706	0.60871	0.12652	0.48866	0.06737
NONMMUT098357.1	-4.51433555763226	0.00256457	0.317118	down	16:+:39999561-40000702	NONMMUG061465.1	16:+:39999561-40000702	16:+:39999561-40000702	NONMMUG061465.1	-	-	-	lncRNA	0.02601	0.05708	0	0.46292	0.61472	0.56692
NONMMUT074650.2	-1.37994944397818	0.0232089	0.692731	down	X:+:166177131-166178398	MERGE.64327	X:+:166177131-166178398	X:+:166177131-166178398	NONMMUG046322.2	-	-	-	lncRNA	0.25769	0.47127	0.37609	0.85469	0.95529	1.30976
ENSMUST00000212899	-1.37520647744599	0.0394963	0.730234	down	8:+:121833653-121841178	MERGE.58995	8:+:121833247-121841178	8:+:121833653-121841178	ENSMUSG00000110631	105246823	-	Gm42047	predicted gene, 42047 [Source:MGI Symbol;Acc:MGI:5624932]	4.04061	1.52476	0.85807	3.60881	4.91761	6.32894
MERGE.12676.1	-1.05578989172742	0.0325562	0.730234	down	12:+:71203991-71204488	MERGE.12676	12:+:71203991-71204488	-	-	-	-	-	-	2.32626	0.82906	1.60398	2.91928	3.39976	3.22184
NONMMUT035734.2	-3.15332589027551	0.0445398	0.730234	down	2:+:11339488-11344111	MERGE.31193	2:+:11339488-11344111	2:+:11339488-11344111	NONMMUG021972.2	-	-	-	lncRNA	0	0.22874	0.08859	0.58103	0.37502	0.54903
NONMMUT101125.1	1.59858	0.0409802	0.730234	up	17:+:48060511-48061385	NONMMUG018485.2	17:+:48055518-48061385	17:+:48060511-48061385	NONMMUG018485.2	-	-	-	lncRNA	0.56014	0.3601	0.59951	0.09063	0.14158	0.3217
NONMMUT079990.1	-1.71812208051186	0.0336662	0.730234	down	10:+:34510443-34511267	MERGE.4987	10:+:34510443-34511267	10:+:34510443-34511267	NONMMUG049759.1	-	-	-	lncRNA	0.23955	0.31544	0.26921	0.81004	1.42089	0.77182
NONMMUT105521.1	-3.41603033437825	0.0404743	0.730234	down	19:+:41571410-41572218	MERGE.30336	19:+:41571410-41572559	19:+:41571410-41572218	NONMMUG065977.1	-	-	-	lncRNA	0.71599	0	0.05895	0.47376	0.95282	0.6263
NONMMUT065962.2	1.08555	0.00362806	0.369738	up	8:-:69907069-69908464	MERGE.56542	8:-:69907069-69996384	8:-:69907069-69908464	NONMMUG040815.2	-	-	-	lncRNA	10.1072	10.0322	11.5464	4.88514	5.63019	5.39382
NONMMUT096496.1	-4.47773408877744	0.0258821	0.706172	down	15:+:99457961-99465778	MERGE.22174	15:+:99457933-99465778	15:+:99457961-99465778	NONMMUG015449.2	-	-	-	lncRNA	0.94437	0	0	1.08481	0.63653	0.82982
MERGE.6069.5	1.13742	0.0410149	0.730234	up	10:-:80542273-80561560	MERGE.6069	10:-:80540922-80561705	-	-	-	-	-	-	3.11154	0.96822	2.65746	0.97266	1.10689	0.87034
NONMMUT098083.1	-1.23354973966957	0.00563018	0.446231	down	16:+:19231333-19234802	MERGE.22920	16:+:19231333-19234802	16:+:19231333-19234802	NONMMUG061303.1	-	-	-	lncRNA	0.45798	0.29746	0.47757	1.12739	0.87667	1.06673
MERGE.43967.3	-8.17378924987535	0.0117169	0.586942	down	5:-:23960931-24030583	MERGE.43967	5:-:23915276-24030690	-	-	-	-	-	-	0	0	1.63038	4.71272	6.2189	2.17972
NONMMUT141041.1	-4.57848168624459	0.0406732	0.730234	down	11:-:83849777-83850559	MERGE.9796	11:-:83849585-83850724	11:-:83849777-83850559	NONMMUG053290.2	-	-	-	lncRNA	0	2.13001	0	2.54344	2.40143	1.08848
MERGE.29421.1	-1.59641353127825	0.0235933	0.693117	down	19:-:8485922-8486282	MERGE.29421	19:-:8485922-8486282	-	-	-	-	-	-	0.74056	0.36116	1.25496	2.52613	2.51657	1.63746
NONMMUT073226.2	-1.03352715074272	0.04954	0.730234	down	X:-:95159096-95160856	MERGE.63320	X:-:95159096-95160856	X:-:95159096-95160856	NONMMUG045405.2	-	-	-	lncRNA	0.70002	0.28998	0.25726	0.65294	0.86763	0.90312
NONMMUT137184.1	2.19498	0.0102282	0.565749	up	X:-:98545742-98549238	MERGE.63341	X:-:98545742-98549238	X:-:98545742-98549238	NONMMUG086700.1	-	-	-	lncRNA	1.31237	0.3573	0.45343	0.08315	0.16532	0.18111
MERGE.25881.1	-1.11919584736609	0.0176013	0.650254	down	17:-:43660417-43661143	MERGE.25881	17:-:43660417-43661143	-	-	-	-	-	-	1.18491	0.7323	0.62317	1.89065	1.72298	1.99403
NONMMUT151177.1	1.52242	0.0394648	0.730234	up	7:+:97462651-97463115	NONMMUG094978.1	7:+:97462651-97463115	7:+:97462651-97463115	NONMMUG094978.1	-	-	-	lncRNA	0.86239	0.56077	0.64098	0.14211	0.35522	0.24214
NONMMUT076672.1	1.77235	0.0311346	0.730234	up	1:+:162217623-162225550	MERGE.3187	1:+:162217623-162225550	1:+:162217623-162225550	NONMMUG002239.2	-	-	-	lncRNA	4.36314	2.30511	2.39104	1.97546	1.0591	0.32665
MERGE.55150.7	6.4939	0.0288503	0.724224	up	8:-:11611585-11635734	MERGE.55150	8:-:11611583-11635757	-	-	-	-	-	-	0.71866	0.99872	1.52303	1.68648	0	0
MERGE.35408.1	1.84109	0.0164433	0.639195	up	2:-:164998782-165034803	MERGE.35408	2:-:164998782-165034867	-	-	-	-	-	-	2.4288	0.83902	0.63956	0.36307	0.46746	0.19789
MERGE.22593.1	-1.76316723676371	0.0132575	0.606853	down	16:+:10529577-10530640	MERGE.22593	16:+:10529577-10530640	-	-	-	-	-	-	0.3071	0.52078	0.49302	1.05582	2.32865	1.6667
NONMMUT050715.2	-1.68033781748857	0.0127308	0.602203	down	4:+:150478732-150480171	MERGE.43277	4:+:150281646-150621989	4:+:150478732-150480171	NONMMUG031433.2	-	-	-	lncRNA	0.72199	0.88278	0.38913	1.49602	2.34194	2.97125
MERGE.53203.1	2.66534	0.0497293	0.730234	up	7:+:81762873-81770368	MERGE.53203	7:+:81762873-81770368	-	-	-	-	-	-	1.67292	2.28344	14.7007	0.24206	1.51893	0.73465
MERGE.2832.1	-1.09195124953498	0.0261162	0.707457	down	1:+:147479601-147480114	MERGE.2832	1:+:147479601-147480114	-	-	-	-	-	-	1.2714	0.7187	0.69584	2.0056	1.66036	2.08103
MERGE.36069.1	-1.41786728118806	0.0149667	0.626998	down	3:+:7603502-7604115	MERGE.36069	3:+:7603502-7604115	-	-	-	-	-	-	0.6773	0.63704	0.66018	1.33455	2.10733	2.38393
NONMMUT027915.2	2.99211	0.0226383	0.688608	up	16:-:97947843-97948766	MERGE.24377	16:-:97944469-97962621	16:-:97947843-97948766	NONMMUG017301.2	-	-	-	lncRNA	11.6214	8.91306	8.77387	0.34328	0.80444	8.30142
NONMMUT009656.2	-2.0818032426985	0.0478399	0.730234	down	11:+:51580704-51582475	MERGE.8425	11:+:51289920-51583918	11:+:51580704-51582475	NONMMUG006047.2	-	-	-	lncRNA	2.69051	3.00443	27.8609	27.0146	24.1351	30.4362
NONMMUT049200.2	1.3517	0.0192268	0.660096	up	4:+:119438687-119441524	MERGE.42070	4:+:119438687-119441524	4:+:119438687-119441524	NONMMUG030454.2	-	-	-	lncRNA	0.89491	0.45175	0.50411	0.20025	0.18431	0.39178
MERGE.47675.1	1.42693	0.0430435	0.730234	up	6:-:17693345-17693640	MERGE.47675	6:-:17693345-17693640	-	-	-	-	-	-	1.80636	0.99106	2.25554	0.4465	0.60454	0.76078
NONMMUT037592.2	2.88227	0.0376004	0.730234	up	2:-:63973980-63976730	MERGE.32586	2:-:63971507-64098038	2:-:63973980-63976730	NONMMUG023190.2	-	-	-	lncRNA	1.71684	0.84914	1.45181	0.04324	1.49607	0.08697
NONMMUT117919.1	-1.07000467578648	0.0263702	0.709425	down	5:+:9173250-9174335	MERGE.43711	5:+:9173250-9175347	5:+:9173250-9174335	NONMMUG073987.1	-	-	-	lncRNA	1.94201	1.62075	1.18563	2.95726	2.91521	5.08024
MERGE.34324.9	-5.96106496225224	0.0256401	0.705875	down	2:-:130736521-130840111	MERGE.34324	2:-:130706200-130906406	-	-	-	-	-	-	0	0	0.51165	0.43994	0.67404	1.74623
MERGE.43890.1	1.00376	0.0397172	0.730234	up	5:+:21298124-21300027	MERGE.43890	5:+:21298124-21300027	-	-	-	-	-	-	5.56961	2.51653	2.79895	1.30498	1.8652	2.52806
NONMMUT129151.1	3.0423	0.0447117	0.730234	up	8:+:91824489-91825485	NONMMUG081082.1	8:+:91824489-91825485	8:+:91824489-91825485	NONMMUG081082.1	-	-	-	lncRNA	0.77464	0.30514	0.43049	0	0.24851	0.11293
MERGE.19495.1	-1.33549336629573	0.0261677	0.70793	down	14:+:98172740-98175690	MERGE.19495	14:+:98172740-98175690	-	-	-	-	-	-	1.18778	0.55595	0.29896	1.47794	1.5626	1.68835
MERGE.49918.71	-2.23825501636133	0.0192936	0.660252	down	6:-:99428206-99435616	MERGE.49918	6:-:98925338-99666797	-	-	-	-	-	-	0.39019	0.17494	0.40414	0.75042	1.48147	3.11305
MERGE.60991.1	2.83637	0.0149991	0.627229	up	9:-:86547915-86571842	MERGE.60991	9:-:86547915-86571842	-	-	-	-	-	-	3.8561	2.75747	3.13826	2.23702	0.21022	0.21084
MERGE.372.1	-2.00956528376941	0.0196687	0.663933	down	1:+:23331924-23332489	MERGE.372	1:+:23331924-23332489	-	-	-	-	-	-	2.04678	0.46071	0.25277	2.96552	2.18876	2.5115
NONMMUT097482.1	1.66457	0.0341866	0.730234	up	15:-:83259717-83262365	MERGE.21781	15:-:83250557-83265015	15:-:83259717-83262365	NONMMUG015090.2	-	-	-	lncRNA	1.02043	0.39375	0.99464	0.10976	0.34815	0.38785
MERGE.25231.11	-5.36456497761205	0.0308914	0.730234	down	17:-:25987485-26069495	MERGE.25231	17:-:25958364-26069495	-	-	-	-	-	-	0.00167	0.21218	2.40182	5.45714	4.80149	6.3453
NONMMUT094552.1	-1.45066616495535	0.012895	0.604094	down	14:-:68441270-68441898	MERGE.19088	14:-:68441270-68441898	14:-:68441270-68441898	NONMMUG059040.1	-	-	-	lncRNA	1.25146	1.19187	0.68235	2.39534	2.73547	3.871
NONMMUT131709.1	-1.07728324165605	0.0434674	0.730234	down	8:-:115523454-115525459	MERGE.58244	8:-:115523454-115525459	8:-:115523454-115525459	NONMMUG082891.1	-	-	-	lncRNA	0.44424	0.23832	0.26745	0.50731	0.61071	1.01032
MERGE.21423.1	1.13019	0.0378803	0.730234	up	15:+:78858901-78859867	MERGE.21423	15:+:78858901-78859867	-	-	-	-	-	-	3.28686	1.07863	1.45482	0.82005	0.7829	0.87328
NONMMUT149001.1	1.23972	0.0215314	0.679548	up	5:+:76160860-76161223	MERGE.45158	5:+:76160860-76161223	5:+:76160860-76161223	NONMMUG093705.1	-	-	-	lncRNA	2.48898	2.14912	2.88228	1.56128	0.98321	0.85065
NONMMUT152826.1	1.6583	0.0034155	0.360821	up	8:-:91113762-91116671	MERGE.57271	8:-:91113762-91116671	8:-:91113762-91116671	NONMMUG095851.1	-	-	-	lncRNA	1.42569	0.75642	0.75037	0.37642	0.242	0.33652
NONMMUT013233.2	-2.1897133432875	0.0137819	0.614409	down	12:+:3509320-3510810	MERGE.11411	12:+:3426798-3510810	12:+:3509320-3510810	NONMMUG008397.2	-	-	-	lncRNA	0.16934	0.19675	0.09595	1.36507	0.56315	0.48142
NONMMUT056824.2	3.28678	0.0300115	0.730234	up	6:+:48599084-48599904	MERGE.48511	6:+:48599084-48599904	6:+:48599084-48599904	NONMMUG035268.2	-	-	-	lncRNA	1.01307	0.51612	0.69703	0.17708	0	0.27429
MERGE.22073.4	-6.35066405066156	0.00293079	0.34085	down	15:+:97247390-97374228	MERGE.22073	15:+:97246622-97385687	-	-	-	-	-	-	0	0	0	0.85897	3.33448	0.16631
MERGE.50102.5	-3.5588726819381	0.0284906	0.722145	down	6:-:115958563-115969426	MERGE.50102	6:-:115954811-115995005	-	-	-	-	-	-	0.94584	0.0374	0.02052	0.82802	2.17016	0.53778
NONMMUT080694.1	-1.32544090778463	0.0460886	0.730234	down	10:+:94408892-94426190	MERGE.6523	10:+:94408891-94426190	10:+:94408892-94426190	NONMMUG004449.2	-	-	-	lncRNA	0.38462	0.28136	0.21374	0.92146	0.8226	0.53269
NONMMUT008184.2	-3.20913565684147	0.0312276	0.730234	down	10:+:128800231-128800824	MERGE.7348	10:+:128790910-128800824	10:+:128800231-128800824	NONMMUG005065.2	-	-	-	lncRNA	1.82528	0.12804	6.72377	11.3252	11.7025	10.8046
NONMMUT034860.2	-1.47950136834784	0.00112063	0.214786	down	19:+:44969065-44983259	MERGE.30463	19:+:44931119-44983835	19:+:44969065-44983259	NONMMUG021454.2	-	-	-	lncRNA	0.71317	0.48468	0.67958	1.99392	1.84214	1.74403
NONMMUT022035.2	-1.11875969898727	0.0489419	0.730234	down	14:+:101670633-101672515	MERGE.19586	14:+:101670633-101672515	14:+:101670633-101672515	NONMMUG013687.2	-	-	-	lncRNA	1.35666	0.54815	0.34823	1.5301	1.35968	1.50236
MERGE.26352.1	-1.55078773100367	0.00982038	0.557856	down	17:-:63524990-63525599	MERGE.26352	17:-:63524990-63525599	-	-	-	-	-	-	0.48696	0.32061	0.60588	1.23497	1.62471	1.40743
MERGE.21219.6	3.99184	0.0396189	0.730234	up	15:-:75044955-75049118	MERGE.21219	15:-:75044018-75135167	-	-	-	-	-	-	1.58317	0.16685	0.4631	0.08357	0	0.05086
MERGE.30367.14	1.91702	0.0427532	0.730234	up	19:-:41944727-41981130	MERGE.30367	19:-:41940836-41981157	-	-	-	-	-	-	3.38975	8.10807	1.20015	0.67438	1.22151	0.88989
NONMMUT021123.2	3.73827	0.0350045	0.730234	up	14:+:60485173-60506752	MERGE.18812	14:+:60484853-60599851	14:+:60485173-60506752	NONMMUG013116.2	-	-	-	lncRNA	0.82819	0.44429	0.64264	0	0.71639	0
NONMMUT072211.2	-1.28641434894972	0.00296022	0.34085	down	X:+:41661916-41664183	MERGE.62726	X:+:41400854-41678601	X:+:41661916-41664183	NONMMUG044759.2	-	-	-	lncRNA	4.87218	3.88994	2.82283	8.23403	10.9488	10.3075
MERGE.30818.1	-1.25287666304287	0.0456236	0.730234	down	19:-:57275999-57278127	MERGE.30818	19:-:57275999-57278127	-	-	-	-	-	-	1.80683	0.41847	0.76158	1.47746	2.32755	2.75008
NONMMUT074752.2	4.25811	0.0255136	0.704505	up	Y:+:1048393-1049134	MERGE.64383	Y:+:1048393-1049134	Y:+:1048393-1049134	NONMMUG046382.2	-	-	-	lncRNA	0.92076	0.73214	0.41776	0.62342	0	0
MERGE.13346.1	-2.62165232963602	0.00470821	0.413963	down	12:+:88163718-88163935	MERGE.13346	12:+:88163718-88163935	-	-	-	-	-	-	0.27252	0.64791	0.43751	2.66753	2.77823	3.61543
MERGE.42238.2	-4.90225072283302	0.00586082	0.454782	down	4:-:126232167-126256277	MERGE.42238	4:-:126232167-126256516	-	-	-	-	-	-	0.00461	0.18529	0.14417	2.89736	3.03894	1.12158
MERGE.59898.1	1.04383	0.046806	0.730234	up	9:-:45959604-45962396	MERGE.59898	9:-:45959604-45962396	-	-	-	-	-	-	1.0529	0.45125	0.58906	0.44481	0.40412	0.20157
NONMMUT074761.2	6.48538	0.0163351	0.638915	up	Y:-:1161997-1163078	MERGE.64391	Y:-:1096861-1245759	Y:-:1161997-1163078	NONMMUG046386.2	-	-	-	lncRNA	7.3026	3.89614	4.27522	4.88591	0	0
NONMMUT123058.1	1.91137	0.0253039	0.702554	up	6:+:127821568-127822344	MERGE.50514	6:+:127821568-127822344	6:+:127821568-127822344	NONMMUG077181.1	-	-	-	lncRNA	1.2807	0.51738	0.41428	0.15309	0.15944	0.18114
MERGE.49509.1	-1.58552757472036	0.00321518	0.352286	down	6:-:88835424-88841984	MERGE.49509	6:-:88835424-88841984	-	-	-	-	-	-	0.75383	0.29624	0.46008	1.52454	1.30489	1.66483
MERGE.32619.5	-3.82599772385092	0.0124371	0.59748	down	2:-:65460860-65529404	MERGE.32619	2:-:65457118-65567627	-	-	-	-	-	-	0.12045	0.08182	0.02993	1.93946	1.78074	0.27448
MERGE.32619.1	-1.36908340967816	0.0221433	0.685174	down	2:-:65457118-65468645	MERGE.32619	2:-:65457118-65567627	-	-	-	-	-	-	1.74455	1.71803	0.60377	3.41449	2.68223	4.0106
NONMMUT055792.2	2.63952	0.0364294	0.730234	up	6:-:13870803-13871465	MERGE.47605	6:-:13867735-13871518	6:-:13870803-13871465	NONMMUG034638.2	-	-	-	lncRNA	1.3665	1.16352	1.06094	0.27908	0.85122	0.02123
MERGE.56907.1	-1.43866118089464	0.0163326	0.638915	down	8:-:77499020-77499774	MERGE.56907	8:-:77499020-77499774	-	-	-	-	-	-	1.10163	0.37416	0.47373	2.13563	1.3856	1.41675
NONMMUT082026.1	1.51455	0.0164648	0.639217	up	10:-:61825948-61829191	NONMMUG051064.1	10:-:61825948-61829191	10:-:61825948-61829191	NONMMUG051064.1	-	-	-	lncRNA	2.06943	0.97129	1.21279	0.3463	0.39886	0.94581
NONMMUT030435.2	5.06771	0.0260976	0.707363	up	17:+:71248007-71249816	MERGE.26663	17:+:71182560-71249817	17:+:71248007-71249816	NONMMUG018828.2	-	-	-	lncRNA	38.3123	36.0286	37.1101	0.14604	39.8269	0.24105
NONMMUT094823.1	-1.12843401479648	0.0113858	0.581194	down	14:-:100204789-100210337	MERGE.19564	14:-:100204789-100210337	14:-:100204789-100210337	NONMMUG059201.1	-	-	-	lncRNA	0.88059	0.45426	0.5092	1.07894	1.471	1.70444
MERGE.11737.1	-6.57972236722884	9.0907e-06	0.0123164	down	12:-:19862980-19863265	MERGE.11737	12:-:19862980-19863265	-	-	-	-	-	-	0	0	0	2.77267	1.78077	2.16528
NONMMUT131724.1	-1.13914101550412	0.0419962	0.730234	down	8:-:115596467-115597963	MERGE.58263	8:-:115596467-115597963	8:-:115596467-115597963	NONMMUG082906.1	-	-	-	lncRNA	0.39685	0.17419	0.32652	0.60034	0.51492	0.90256
MERGE.5912.9	-1.07359556754015	0.0464755	0.730234	down	10:-:77290727-77418217	MERGE.5912	10:-:77290726-77418270	-	-	-	-	-	-	0.84751	1.44609	1.35354	3.07149	3.54374	1.7001
NONMMUT141817.1	1.01529	0.0436804	0.730234	up	12:-:32376490-32377097	MERGE.11988	12:-:32376490-32377097	12:-:32376490-32377097	NONMMUG089393.1	-	-	-	lncRNA	3.63979	2.18015	3.25506	2.36939	0.99614	1.5741
NONMMUT016506.2	-1.64512573380806	0.00604172	0.459001	down	13:+:17944319-17949427	MERGE.14512	13:+:17944291-17949427	13:+:17944319-17949427	NONMMUG010373.2	-	-	-	lncRNA	0.33891	0.37189	0.20004	1.1265	0.94229	0.89736
NONMMUT010280.2	2.32305	0.0096099	0.553847	up	11:+:67064737-67068155	MERGE.8994	11:+:67052670-67068155	11:+:67064737-67068155	NONMMUG006459.2	-	-	-	lncRNA	0.58645	1.39825	1.42619	0.13916	0.28182	0.29639
MERGE.11685.1	1.98926	0.0179892	0.652451	up	12:+:17807799-17809514	MERGE.11685	12:+:17807799-17809514	-	-	-	-	-	-	2.70907	0.63949	0.8893	0.33888	0.19252	0.41829
NONMMUT045461.2	-6.46174833688098	5.89829e-05	0.0382528	down	3:+:137915425-137916557	MERGE.39318	3:+:137864445-137916557	3:+:137915425-137916557	NONMMUG028056.2	-	-	-	lncRNA	0.05244	0.02877	0.03157	2.9279	4.17928	3.39126
MERGE.5191.1	-1.20972044526619	0.0251355	0.702508	down	10:-:42444671-42445451	MERGE.5191	10:-:42444671-42445451	-	-	-	-	-	-	1.36922	0.91817	0.58008	1.72609	2.5732	2.4148
MERGE.54851.4	3.96055	0.0195408	0.662557	up	7:-:142355433-142372109	MERGE.54851	7:-:142325837-142388038	-	-	-	-	-	-	1.38383	0.82906	0.82354	0	0.36485	0.14696
NONMMUT147485.1	1.79167	0.00790455	0.512801	up	3:+:100685834-100686580	MERGE.38347	3:+:100685834-100686580	3:+:100685834-100686580	NONMMUG092770.1	-	-	-	lncRNA	1.35202	1.19268	1.61196	0.70771	0.29483	0.3203
MERGE.31842.7	-7.77587113268982	0.0103715	0.568498	down	2:-:30345141-30359251	MERGE.31842	2:-:30344809-30359337	-	-	-	-	-	-	0	0	1.8256	10.4705	3.73067	13.8517
MERGE.3068.1	-1.22647448837027	0.0373853	0.730234	down	1:-:156882020-156882756	MERGE.3068	1:-:156882020-156882756	-	-	-	-	-	-	0.8464	0.88453	1.21324	2.58231	3.77274	1.48955
NONMMUT115204.1	-1.19451336322513	0.0315007	0.730234	down	4:+:85797137-85798013	MERGE.41269	4:+:85797137-85798013	4:+:85797137-85798013	NONMMUG072239.1	-	-	-	lncRNA	0.76209	0.37166	1.08754	1.58235	1.80497	1.54063
NONMMUT009437.2	-1.03687448805678	0.0106494	0.572356	down	11:+:44745945-44747500	MERGE.8269	11:+:44745945-44747500	11:+:44745945-44747500	NONMMUG005885.2	-	-	-	lncRNA	0.98315	0.57956	0.88114	1.82617	1.6808	1.74572
NONMMUT069924.2	-1.39549845826114	0.029678	0.728763	down	9:-:72052302-72056252	MERGE.60724	9:-:72046715-72062487	9:-:72052302-72056252	NONMMUG043283.2	-	-	-	lncRNA	0.45485	0.66823	0.32589	0.8463	1.31691	2.09459
NONMMUT063473.2	1.51038	0.0333376	0.730234	up	7:-:121062852-121063945	MERGE.54160	7:-:121062852-121063959	7:-:121062852-121063945	NONMMUG039204.2	-	-	-	lncRNA	0.86887	0.68527	0.86092	0.67652	0.16357	0.20584
MERGE.34486.1	-1.04757454482486	0.0362015	0.730234	down	2:+:136933761-136934980	MERGE.34486	2:+:136933761-136934980	-	-	-	-	-	-	1.1687	0.81042	0.50816	1.38664	1.89549	1.98425
MERGE.5879.1	1.2639	0.016962	0.644318	up	10:-:76591972-76593027	MERGE.5879	10:-:76591972-76593027	-	-	-	-	-	-	3.09423	1.1935	1.5693	0.70087	0.88638	0.78635
NONMMUT051833.2	1.06227	0.0159002	0.635641	up	5:-:32608453-32610537	MERGE.44289	5:-:32607020-32611805	5:-:32608453-32610537	NONMMUG032147.2	-	-	-	lncRNA	0.96166	1.037	0.93776	0.57049	0.43572	0.49952
MERGE.11858.1	-5.15785285007107	0.000433042	0.128472	down	12:-:24321183-24321447	MERGE.11858	12:-:24321183-24321447	-	-	-	-	-	-	0.11209	0	0	1.54607	1.66217	1.75265
MERGE.41193.1	1.1264	0.0152277	0.628861	up	4:+:83702092-83702386	MERGE.41193	4:+:83702092-83702386	-	-	-	-	-	-	4.32982	3.97769	4.72844	2.01606	2.00641	2.29006
MERGE.27006.1	-1.08187797920234	0.00921617	0.543727	down	17:+:88074081-88074963	MERGE.27006	17:+:88074081-88074963	-	-	-	-	-	-	1.14378	0.93515	1.14766	2.34991	2.55656	2.40682
MERGE.33539.6	-3.87712012033492	0.0182254	0.654393	down	2:-:104427049-104494511	MERGE.33539	2:-:104426481-104504131	-	-	-	-	-	-	0.80151	0.03319	1.63341	5.86581	7.39401	3.51739
MERGE.29477.1	1.93409	0.0112759	0.579911	up	19:-:9082147-9083026	MERGE.29477	19:-:9082147-9083026	-	-	-	-	-	-	2.68354	2.13596	1.97799	1.02127	0.25027	0.89564
NONMMUT001020.2	1.16156	0.00263788	0.322351	up	1:+:58200812-58202206	MERGE.978	1:+:58200812-58202206	1:+:58200812-58202206	NONMMUG000685.2	-	-	-	lncRNA	8.1661	6.38659	6.13627	3.11699	3.58183	3.17808
MERGE.15151.1	-2.0978482949919	0.0452762	0.730234	down	13:-:43393613-43480588	MERGE.15151	13:-:43393613-43481282	-	-	-	-	-	-	0.21782	0.04861	0.09187	0.29403	1.31387	0.22215
MERGE.30861.1	1.78987	0.0194638	0.661562	up	19:-:59760478-59943364	MERGE.30861	19:-:59760478-59943654	-	-	-	-	-	-	2.08683	1.55713	3.1301	1.17255	0.28734	0.90401
MERGE.41261.1	-1.73842759518925	0.0147594	0.625329	down	4:+:85622868-85623451	MERGE.41261	4:+:85622868-85623451	-	-	-	-	-	-	0.30518	0.44651	0.24498	1.56153	0.9428	1.0604
MERGE.10385.6	2.96135	0.00313053	0.351876	up	11:-:98704900-98729418	MERGE.10385	11:-:98703573-98729435	-	-	-	-	-	-	1.7157	1.10805	1.69995	0.11232	0.12131	0.62021
MERGE.6898.1	-7.48597396616507	0.0136078	0.612079	down	10:+:117026094-117030480	MERGE.6898	10:+:117026094-117030480	-	-	-	-	-	-	0	2.27107	0	4.15441	3.64909	4.4626
NONMMUT083052.1	-2.01761268323335	0.00207208	0.287397	down	10:-:130514876-130516859	MERGE.7387	10:-:130514876-130516859	10:-:130514876-130516859	NONMMUG051691.1	-	-	-	lncRNA	0.23955	0.23001	0.34853	1.03919	0.99906	1.56776
MERGE.62726.6	-1.35781815924641	0.0100917	0.563121	down	X:+:41401413-41420416	MERGE.62726	X:+:41400854-41678601	-	-	-	-	-	-	2.45577	0.80003	1.16485	3.90613	3.16651	3.6794
MERGE.62908.1	1.15241	0.00891682	0.538834	up	X:+:63760038-63760607	MERGE.62908	X:+:63760038-63760607	-	-	-	-	-	-	13.6276	16.9075	12.0267	5.84304	6.7134	8.00015
MERGE.42205.34	-3.93765253067132	0.0113226	0.580624	down	4:-:123395526-123613802	MERGE.42205	4:-:123349633-123684360	-	-	-	-	-	-	1.48819	0.85969	1.44071	56.2536	30.171	4.10935
MERGE.42205.35	1.14163	0.0251535	0.702508	up	4:-:123395526-123478539	MERGE.42205	4:-:123349633-123684360	-	-	-	-	-	-	47.9146	23.2018	39.0258	14.066	21.9218	13.1713
NONMMUT026712.2	3.09758	0.0150853	0.628164	up	16:+:43682103-43685057	MERGE.23602	16:+:43682103-43685057	16:+:43682103-43685057	NONMMUG016558.2	-	-	-	lncRNA	1.35204	0.25738	0.87954	0.03578	0.06521	0.20957
NONMMUT103964.1	-1.21912972669898	0.04061	0.730234	down	18:-:3248370-3249480	MERGE.27099	18:-:3248370-3249480	18:-:3248370-3249480	NONMMUG064994.1	-	-	-	lncRNA	0.5481	0.35206	0.38632	0.71376	0.94161	1.6722
MERGE.32609.1	-1.11899360789089	0.0239707	0.695855	down	2:-:65009764-65010778	MERGE.32609	2:-:65009764-65010778	-	-	-	-	-	-	5.86775	2.35498	2.3257	6.66679	6.56375	9.45685
MERGE.39282.1	-2.12349738628671	0.00140858	0.236833	down	3:-:136205100-136207776	MERGE.39282	3:-:136205100-136207776	-	-	-	-	-	-	0.63248	0.25164	0.60568	2.32534	1.65569	2.50257
NONMMUT079519.1	1.79527	0.0369033	0.730234	up	1:-:186074854-186075711	NONMMUG049472.1	1:-:186074854-186075711	1:-:186074854-186075711	NONMMUG049472.1	-	-	-	lncRNA	1.38483	0.39256	0.51412	0.16944	0.12834	0.27886
NONMMUT012441.2	-1.03693684707793	0.0319182	0.730234	down	11:-:107262663-107264102	MERGE.10769	11:-:107262663-107264102	11:-:107262663-107264102	NONMMUG007884.2	-	-	-	lncRNA	1.80497	0.69415	0.81965	2.43218	2.54268	1.69088
MERGE.24180.1	-2.84162641219938	0.00779766	0.510114	down	16:-:90693033-90693359	MERGE.24180	16:-:90693033-90693359	-	-	-	-	-	-	0.13626	0.79743	0.25521	2.46544	2.18891	3.31414
MERGE.16418.1	-1.06666082020208	0.0173469	0.647365	down	13:-:92111969-92115131	MERGE.16418	13:-:92111969-92115131	-	-	-	-	-	-	1.91112	0.89311	0.79531	2.41096	2.42398	2.66536
MERGE.4650.1	-1.10655040643455	0.0325244	0.730234	down	10:+:18514938-18515560	MERGE.4650	10:+:18514938-18515560	-	-	-	-	-	-	0.85824	1.22079	0.76547	2.29113	2.49668	1.73953
MERGE.24129.11	-1.53348587327073	0.0162936	0.638839	down	16:-:89788619-89837875	MERGE.24129	16:-:89787111-90143814	-	-	-	-	-	-	0.85506	0.45196	0.64669	3.5317	1.21387	1.69548
NONMMUT047458.2	-1.28437046289818	0.0113467	0.580859	down	4:-:58170363-58171646	MERGE.40853	4:-:58170363-58171646	4:-:58170363-58171646	NONMMUG029380.2	-	-	-	lncRNA	0.68246	0.2877	0.40855	1.23518	1.10419	0.9646
MERGE.55138.6	-3.26163826804728	0.045797	0.730234	down	8:-:11198711-11247550	MERGE.55138	8:-:11198423-11312826	-	-	-	-	-	-	76.1878	17.384	1.20491	89.3053	90.9069	183.276
MERGE.54044.1	-1.081217072531	0.0346161	0.730234	down	7:+:117431268-117433237	MERGE.54044	7:+:117431268-117433237	-	-	-	-	-	-	1.12335	0.35297	0.78069	1.61012	1.29264	1.67177
MERGE.14634.9	7.72037	0.0368593	0.730234	up	13:-:21442372-21453706	MERGE.14634	13:-:21442178-21453730	-	-	-	-	-	-	10.4821	2.84095	11.2977	16.3991	0	0
NONMMUT074563.2	1.16797	0.0370403	0.730234	up	X:-:161859445-161861289	MERGE.64252	X:-:161859445-161861289	X:-:161859445-161861289	NONMMUG046254.2	-	-	-	lncRNA	1.449	0.62422	0.58157	0.32951	0.32827	0.49584
NONMMUT021998.2	-1.07431029560562	0.0162335	0.637765	down	14:-:100095153-100097294	MERGE.19553	14:-:100095153-100097294	14:-:100095153-100097294	NONMMUG013666.2	-	-	-	lncRNA	0.58938	0.34999	0.33952	0.82063	0.88681	1.07759
NONMMUT024467.2	1.68025	0.0250266	0.702259	up	15:+:85061908-85062828	MERGE.21717	15:+:85028948-85062830	15:+:85061908-85062828	NONMMUG015131.2	-	-	-	lncRNA	3.5639	4.87214	5.8122	1.07625	3.57199	0.96274
MERGE.27072.4	-2.06540995070065	0.00159314	0.251574	down	17:-:94739851-94749430	MERGE.27072	17:-:94722496-94749892	-	-	-	-	-	-	0.48348	0.242	0.29278	1.78886	1.02981	1.58346
MERGE.63810.1	1.20901	0.0328951	0.730234	up	X:+:134777961-134778974	MERGE.63810	X:+:134777961-134778974	-	-	-	-	-	-	2.6365	0.90006	1.92824	0.71687	0.65159	0.91608
MERGE.19503.1	1.22494	0.00520267	0.429571	up	14:-:99034544-99046107	MERGE.19503	14:-:99034544-99046134	-	-	-	-	-	-	7.73482	4.19011	4.54997	2.22713	2.67743	2.23843
MERGE.19482.1	-1.16142039845475	0.00594946	0.458101	down	14:-:98093661-98094283	MERGE.19482	14:-:98093661-98094283	-	-	-	-	-	-	2.40783	1.56958	1.64575	4.30647	4.22005	4.74416
NONMMUT072765.2	3.72746	0.0372135	0.730234	up	X:+:71970668-71972717	MERGE.62962	X:+:71962093-71972722	X:+:71970668-71972717	NONMMUG045095.2	-	-	-	lncRNA	29.9726	33.3794	34.0741	38.5145	0.5506	0.72088
ENSMUST00000180923	3.89633	0.0422982	0.730234	up	16:-:33379855-33380727	MERGE.23305	16:-:33373096-33380755	16:-:33379855-33380727	ENSMUSG00000097318	100502742	-	1700007L15Rik	RIKEN cDNA 1700007L15 gene	0.38289	0.85505	0.275	0.46625	0	0
MERGE.54581.1	-1.10731823474711	0.0241689	0.698099	down	7:+:139458050-139459231	MERGE.54581	7:+:139458050-139459231	-	-	-	-	-	-	3.51831	1.70053	3.03601	4.48374	8.79229	5.85836
NONMMUT049851.2	8.82172	1.09767e-05	0.0135912	up	4:-:132351933-132353686	MERGE.42493	4:-:132331919-132353686	4:-:132351933-132353686	NONMMUG030867.2	-	-	-	lncRNA	10.366	7.21018	3.7376	0	0	0
NONMMUT101587.1	-1.38150729188583	0.011013	0.578309	down	17:+:88084305-88086834	MERGE.27010	17:+:88079418-88086834	17:+:88084305-88086834	NONMMUG063569.1	-	-	-	lncRNA	0.29352	0.1546	0.16964	0.5694	0.67464	0.40053
MERGE.21966.1	-1.54128274271852	0.0108505	0.576002	down	15:-:91440046-91440526	MERGE.21966	15:-:91440046-91440526	-	-	-	-	-	-	0.46317	0.31624	0.44615	1.31889	1.23054	1.14116
NONMMUT073404.2	-2.84643588049559	0.0089963	0.540666	down	X:-:102315277-102317458	MERGE.63443	X:-:102315277-102319213	X:-:102315277-102317458	NONMMUG045531.2	-	-	-	lncRNA	0.23824	0.09461	0.10928	0.44822	1.8105	1.27714
NONMMUT123065.1	1.8858	0.00767868	0.507406	up	6:+:127847645-127848873	MERGE.50523	6:+:127847645-127848873	6:+:127847645-127848873	NONMMUG077186.1	-	-	-	lncRNA	3.15415	1.0697	1.80433	0.46241	0.3808	0.80163
MERGE.64215.1	-1.62737225692156	0.012649	0.601472	down	X:+:159712934-159715591	MERGE.64215	X:+:159712934-159715591	-	-	-	-	-	-	0.79346	0.24935	0.47545	0.98452	1.59503	2.11803
MERGE.16879.1	-1.53531867888924	0.00473242	0.414557	down	13:+:112705535-112706764	MERGE.16879	13:+:112705535-112706764	-	-	-	-	-	-	1.23165	0.742	0.74635	2.3854	2.24938	3.8447
NONMMUT152734.1	-5.10730693916252	0.0211281	0.676607	down	8:-:69565388-69566814	MERGE.56498	8:-:69523615-69585162	8:-:69565388-69566814	NONMMUG082562.2	-	-	-	lncRNA	3.16396	0	0	2.16395	2.08412	2.57699
NONMMUT138533.1	1.57632	0.0428952	0.730234	up	1:+:23256286-23257398	MERGE.346	1:+:23256071-23272339	1:+:23256286-23257398	NONMMUG046586.2	-	-	-	lncRNA	1.25437	0.45881	0.53559	0.21374	0.12367	0.42994
NONMMUT001471.2	-6.94764031068472	0.0153541	0.630509	down	1:-:72858067-72859857	MERGE.1307	1:-:72857932-72874884	1:-:72858067-72859857	NONMMUG000991.2	-	-	-	lncRNA	0.10781	69.297	0.07988	120.615	115.999	103.833
ENSMUST00000191839	1.30218	0.0435134	0.730234	up	1:+:164462442-164463989	MERGE.3251	1:+:164458526-164464484	1:+:164462442-164463989	ENSMUSG00000104011	102634922	-	Gm32391	predicted gene, 32391 [Source:MGI Symbol;Acc:MGI:5591550]	0.99015	1.58951	1.3026	0.75872	0.45883	0.44308
MERGE.18055.1	1.43078	0.0181163	0.653666	up	14:+:38460045-38460284	MERGE.18055	14:+:38460045-38460284	-	-	-	-	-	-	3.46553	1.90137	2.18573	0.99123	1.03237	0.70372
MERGE.16652.2	4.28367	0.032415	0.730234	up	13:-:100497763-100553183	MERGE.16652	13:-:100496507-100565860	-	-	-	-	-	-	1.39586	7.93981	12.7172	1.17652	0.67031	0.02183
NONMMUT022985.2	-1.0573047269047	0.0175024	0.649304	down	15:+:30227654-30231765	MERGE.20386	15:+:30227654-30231765	15:+:30227654-30231765	NONMMUG014215.2	-	-	-	lncRNA	0.52734	0.26423	0.31313	0.62354	0.84692	0.91045
MERGE.12588.2	-5.5319957859513	0.0269009	0.712923	down	12:-:69746870-69758712	MERGE.12588	12:-:69746848-69791267	-	-	-	-	-	-	0	0	2.86093	2.59873	1.74547	2.24783
NONMMUT089820.1	4.09605	0.00227901	0.301929	up	13:+:49392979-49394184	MERGE.15297	13:+:49392478-49397011	13:+:49392979-49394184	NONMMUG055944.1	-	-	-	lncRNA	0.68966	0.46847	0.5536	0.01096	0.01141	0.10503
NONMMUT007620.2	-5.16624703945422	0.00706061	0.489652	down	10:-:119058517-119060479	MERGE.6972	10:-:119057677-119076209	10:-:119058517-119060479	NONMMUG004829.2	-	-	-	lncRNA	0.31268	0	0.06605	1.90375	1.35742	0.88111
MERGE.17985.7	-1.02902990677815	0.0275978	0.715612	down	14:-:33154818-33185177	MERGE.17985	14:-:32959547-33185508	-	-	-	-	-	-	1.05252	0.49356	0.67157	1.69708	1.12554	1.87544
NONMMUT022638.2	-1.01528499780501	0.00822116	0.523513	down	15:+:6405687-6409136	MERGE.19913	15:+:6405687-6409136	15:+:6405687-6409136	NONMMUG013973.2	-	-	-	lncRNA	1.51106	1.04556	0.8812	2.35597	2.37394	2.59049
NONMMUT029859.2	-1.37464719605068	0.0126362	0.601311	down	17:-:46870258-46872968	MERGE.26035	17:-:46870258-46872968	17:-:46870258-46872968	NONMMUG018451.2	-	-	-	lncRNA	0.83045	0.53741	0.56406	2.58643	1.5097	1.31663
MERGE.18749.23	-10.4384534430793	0.00142946	0.237566	down	14:-:57689662-57745975	MERGE.18749	14:-:57575384-57758388	-	-	-	-	-	-	0	0	0	2.01735	6.45206	0.34748
MERGE.8340.1	-1.86969906600701	0.000730157	0.177063	down	11:-:48936269-48937862	MERGE.8340	11:-:48936269-48937862	-	-	-	-	-	-	0.61496	0.47713	0.67314	2.02309	2.3143	2.56058
MERGE.60702.1	1.08986	0.0169555	0.644318	up	9:-:71626509-71771592	MERGE.60702	9:-:71626509-71771602	-	-	-	-	-	-	6.27818	7.06572	7.98675	5.41407	2.66713	2.83963
MERGE.8542.1	1.26414	0.0165906	0.640801	up	11:-:53971753-53975325	MERGE.8542	11:-:53971753-53975325	-	-	-	-	-	-	3.13008	1.03389	1.79182	0.81377	0.72426	0.89023
NONMMUT081330.1	-3.7172744919212	0.0292794	0.726531	down	10:-:8942559-8943727	NONMMUG002998.2	10:-:8942559-8945303	10:-:8942559-8943727	NONMMUG002998.2	-	-	-	lncRNA	0.63526	0	0.11218	0.75748	0.82424	0.91501
NONMMUT117921.1	-1.21886398976228	0.010028	0.561963	down	5:+:9176472-9177639	MERGE.43712	5:+:9176472-9177639	5:+:9176472-9177639	NONMMUG073988.1	-	-	-	lncRNA	1.01728	0.65116	0.95949	1.686	2.29808	2.54254
MERGE.54227.1	-2.05938773530894	0.0145451	0.62424	down	7:-:123279194-123370104	MERGE.54227	7:-:123279194-123370104	-	-	-	-	-	-	0.4697	0.06569	0.30163	0.81627	0.91032	1.08526
NONMMUT087794.1	2.19325	0.0266621	0.711563	up	12:+:116153010-116153940	NONMMUG054673.1	12:+:116153010-116153940	12:+:116153010-116153940	NONMMUG054673.1	-	-	-	lncRNA	2.45677	0.47848	0.76834	0.26972	0.20699	0.15117
NONMMUT048324.2	-1.08504508761024	0.0349573	0.730234	down	4:+:100809939-100813752	MERGE.41560	4:+:100809939-100813752	4:+:100809939-100813752	NONMMUG029968.2	-	-	-	lncRNA	1.04363	0.39597	0.3501	1.35837	1.25234	0.98897
NONMMUT086511.1	-2.50332496382199	0.00093925	0.202781	down	12:+:21564256-21568291	MERGE.11825	12:+:21564256-21568291	12:+:21564256-21568291	NONMMUG053876.1	-	-	-	lncRNA	0.16192	0.15075	0.07089	0.88742	0.648	0.67303
NONMMUT008693.2	-5.61323354608349	0.00539988	0.435828	down	11:-:18467479-18493255	MERGE.7707	11:-:18467479-18493256	11:-:18467479-18493255	NONMMUG005375.2	-	-	-	lncRNA	0	0.27568	0	0.90739	0.94505	1.00831
MERGE.33711.1	-2.34066354659227	0.00540336	0.435828	down	2:+:112609776-112611304	MERGE.33711	2:+:112609776-112611304	-	-	-	-	-	-	0.63139	0.12791	0.42106	1.28793	1.64746	2.33805
NONMMUT107173.1	-1.24509106971284	0.0374087	0.730234	down	2:+:67566487-67567758	MERGE.32658	2:+:67566487-67567758	2:+:67566487-67567758	NONMMUG066984.1	-	-	-	lncRNA	0.4437	0.13667	0.29993	0.81044	0.56272	0.5643
MERGE.46891.1	9.10796	0.0005616	0.150431	up	5:-:137781906-137787603	MERGE.46891	5:-:137781906-137787655	-	-	-	-	-	-	5.45143	1.79039	6.90569	0	0.04972	0
MERGE.8109.1	-3.08503548245247	0.00458483	0.412915	down	11:+:32910791-32911093	MERGE.8109	11:+:32910791-32911093	-	-	-	-	-	-	3.33319	0.50201	4.01339	13.2164	14.8552	23.9217
NONMMUT034223.2	1.91071	0.00142358	0.237566	up	19:-:23965141-23967615	MERGE.29847	19:-:23965141-23967615	19:-:23965141-23967615	NONMMUG021031.2	-	-	-	lncRNA	1.35021	0.96578	1.40175	0.4272	0.41156	0.22746
MERGE.50631.10	-1.23075105068292	0.00528728	0.433383	down	6:-:129407632-129451851	MERGE.50631	6:-:129375515-129452000	-	-	-	-	-	-	2.42822	1.05528	1.3646	3.57652	3.77653	4.06363
MERGE.47045.1	-1.30409523519007	0.0201861	0.66777	down	5:-:140910039-140910730	MERGE.47045	5:-:140910039-140910730	-	-	-	-	-	-	0.90144	0.56523	0.7236	1.6043	1.49186	2.80673
MERGE.62888.1	-3.28831108655075	0.0234934	0.693117	down	X:+:60216258-60216462	MERGE.62888	X:+:60216258-60216462	-	-	-	-	-	-	0.65205	0.424	0	2.57881	1.54435	2.26563
NONMMUT121030.1	-1.36784915944168	0.0489057	0.730234	down	5:-:109665760-109666916	MERGE.45858	5:-:109665760-109666916	5:-:109665760-109666916	NONMMUG075905.1	-	-	-	lncRNA	0.20539	0.36624	0.13396	0.52546	0.55916	0.7542
NONMMUT043973.2	1.10189	0.0336402	0.730234	up	3:+:89353629-89354898	MERGE.37871	3:+:89353629-89354898	3:+:89353629-89354898	NONMMUG027133.2	-	-	-	lncRNA	0.6549	0.81274	0.751	0.43708	0.31432	0.34355
NONMMUT134573.1	2.41209	0.0236369	0.693117	up	9:-:65544095-65544832	MERGE.60506	9:-:65544095-65544832	9:-:65544095-65544832	NONMMUG084834.1	-	-	-	lncRNA	3.13951	0.91278	1.63162	0.08954	0.59685	0.57213
NONMMUT028393.2	-2.6580814335028	0.0445116	0.730234	down	17:-:16668779-16669022	MERGE.24796	17:-:16668779-16669022	17:-:16668779-16669022	NONMMUG017576.2	-	-	-	lncRNA	0.24348	0.17811	0	0.43332	0.90262	0.92291
NONMMUT060873.2	1.55972	0.00621325	0.461002	up	7:+:39552496-39556305	MERGE.52163	7:+:39517766-39581793	7:+:39552496-39556305	NONMMUG078379.2	-	-	-	lncRNA	7.20784	2.56939	3.90833	1.58874	1.64384	1.34094
MERGE.43734.1	-2.27872291249226	0.00876614	0.534217	down	5:+:9312505-9312817	MERGE.43734	5:+:9312505-9312817	-	-	-	-	-	-	0.71177	0.17356	0.3809	2.1957	1.3633	1.88857
NONMMUT040789.2	1.03664	0.0246734	0.699528	up	2:-:156843128-156862963	MERGE.35159	2:-:156843128-156862963	2:-:156843128-156862963	NONMMUG025278.2	-	-	-	lncRNA	0.60052	0.40865	0.60536	0.31068	0.29769	0.21174
MERGE.40444.1	-1.19514822222963	0.0281556	0.719481	down	4:+:41854131-41854694	MERGE.40444	4:+:41854131-41854694	-	-	-	-	-	-	2.10671	0.61645	0.97237	2.6714	2.73345	2.29581
NONMMUT075150.1	-1.90241618497955	0.00597299	0.458264	down	1:+:23336198-23337067	NONMMUG046597.1	1:+:23336198-23337067	1:+:23336198-23337067	NONMMUG046597.1	-	-	-	lncRNA	0.49508	0.17484	0.27407	1.26087	0.87019	1.22948
MERGE.7570.1	1.17356	0.00976278	0.556839	up	11:-:6258919-6267730	MERGE.7570	11:-:6258919-6267772	-	-	-	-	-	-	4.99218	2.28454	2.67908	1.42214	1.40789	1.65895
MERGE.3288.9	-1.01857201362942	0.0370088	0.730234	down	1:-:165334112-165460238	MERGE.3288	1:-:165327327-165460475	-	-	-	-	-	-	2.17452	2.04903	0.93453	4.23415	3.38794	2.79668
NONMMUT086267.1	-1.36151199930766	0.0213129	0.677528	down	12:+:11171142-11172292	NONMMUG053690.1	12:+:11171142-11172292	12:+:11171142-11172292	NONMMUG053690.1	-	-	-	lncRNA	0.30969	0.24543	0.16573	0.79229	0.56208	0.55026
MERGE.29809.1	1.51988	0.00853347	0.530055	up	19:-:23030807-23031703	MERGE.29809	19:-:23030807-23031703	-	-	-	-	-	-	4.25534	1.64731	2.1	0.83984	0.81331	1.08264
MERGE.15291.1	-1.63192408034382	0.037205	0.730234	down	13:-:49294885-49295459	MERGE.15291	13:-:49294885-49295459	-	-	-	-	-	-	0.36162	0.11337	0.22808	1.01134	0.67029	0.44059
MERGE.27828.1	-2.18536169126326	0.0172316	0.646694	down	18:-:36132897-36133980	MERGE.27828	18:-:36132897-36133980	-	-	-	-	-	-	0.41104	0.20046	0.17597	0.7803	0.83808	2.389
NONMMUT019386.2	-1.27057943428266	0.00249651	0.313913	down	13:+:113822425-113825725	MERGE.16996	13:+:113822425-113825725	13:+:113822425-113825725	NONMMUG012018.2	-	-	-	lncRNA	1.52977	1.06642	1.01127	2.75058	3.56528	2.95472
NONMMUT067035.2	-2.82936728745499	0.0384569	0.730234	down	8:+:107014839-107019713	MERGE.57706	8:+:106935750-107019714	8:+:107014839-107019713	NONMMUG041502.2	-	-	-	lncRNA	1.18209	0.34099	11.3963	8.91395	14.0868	15.0964
MERGE.40299.2	7.06248	0.0144533	0.623941	up	4:-:40259601-40269850	MERGE.40299	4:-:40259601-40269850	-	-	-	-	-	-	1.23837	1.93954	3.07342	0	0	1.23506
MERGE.8673.3	-5.10475308151795	0.0101099	0.563571	down	11:-:58315124-58323314	MERGE.8673	11:-:58315114-58330339	-	-	-	-	-	-	0	0.0226	0.09508	0.36661	1.1598	0.91259
MERGE.35049.12	7.1806	0.0159207	0.635735	up	2:+:154791369-154849535	MERGE.35049	2:+:154791096-155051012	-	-	-	-	-	-	5.91762	3.34045	4.04418	0	4.78262	0
MERGE.39150.2	7.8324	6.3229e-05	0.04021	up	3:-:131318990-131490946	MERGE.39150	3:-:131318985-131491411	-	-	-	-	-	-	0.93958	0.70185	0.96714	0.00882	0	0.0047
MERGE.61012.6	-7.65940417236223	0.000383242	0.120426	down	9:+:88548183-88556135	MERGE.61012	9:+:88548020-88571061	-	-	-	-	-	-	0.15542	0.00494	0.00542	3.49351	3.3191	2.92628
MERGE.57312.10	-1.26623995439479	0.0479232	0.730234	down	8:-:92346932-92355869	MERGE.57312	8:-:92326031-92356120	-	-	-	-	-	-	0.41175	0.27969	0.30691	0.60193	1.06303	0.86397
MERGE.5156.1	-1.29640182165113	0.0379843	0.730234	down	10:-:41803216-41803946	MERGE.5156	10:-:41803216-41803946	-	-	-	-	-	-	1.01589	0.54994	0.27726	1.48255	1.24279	1.367
MERGE.23210.2	2.69046	0.00152784	0.247321	up	16:-:31244110-31275283	MERGE.23210	16:-:31236584-31275283	-	-	-	-	-	-	1.67917	0.68865	1.16529	0.3386	0.10573	0.16314
NONMMUT094528.1	-4.79451403140942	0.0349301	0.730234	down	14:-:66954949-66964906	NONMMUG059021.1	14:-:66954949-66970263	14:-:66954949-66964906	NONMMUG059021.1	-	-	-	lncRNA	0.49368	0	0.04789	0.53487	0.51836	0.62188
NONMMUT047286.2	-2.96432532128304	0.0414575	0.730234	down	4:+:53246097-53251111	NONMMUG029261.2	4:+:53227433-53269050	4:+:53246097-53251111	NONMMUG029261.2	-	-	-	lncRNA	0.30143	0.22051	0	1.02415	0.60952	0.62322
NONMMUT078321.1	-2.13020961123965	0.00175161	0.267959	down	1:-:101892958-101895091	NONMMUG048626.1	1:-:101892958-101895091	1:-:101892958-101895091	NONMMUG048626.1	-	-	-	lncRNA	0.38279	0.12219	0.23464	1.12098	0.87724	1.05525
NONMMUT020793.2	2.0399	0.0415585	0.730234	up	14:-:52198151-52198600	MERGE.18429	14:-:52198151-52258955	14:-:52198151-52198600	NONMMUG012936.2	-	-	-	lncRNA	3.8946	6.03611	3.15274	3.52437	0.97884	0.34404
NONMMUT006156.2	-1.51987393073196	0.0217857	0.681709	down	10:+:71375523-71378514	MERGE.5747	10:+:71347763-71433327	10:+:71375523-71378514	NONMMUG003966.2	-	-	-	lncRNA	0.438	0.36047	0.31563	0.59793	1.55455	1.61308
NONMMUT142100.1	1.05197	0.0489148	0.730234	up	12:-:110596608-110597106	MERGE.13913	12:-:110596608-110597106	12:-:110596608-110597106	NONMMUG089539.1	-	-	-	lncRNA	3.42287	2.35154	3.03429	1.95995	0.82755	1.97436
NONMMUT039154.2	-2.99600366135867	0.0160978	0.637388	down	2:-:113831549-113832110	MERGE.33740	2:-:113831492-113848725	2:-:113831549-113832110	NONMMUG024195.2	-	-	-	lncRNA	0.10571	1.0633	0.12728	2.39871	3.06158	1.60277
MERGE.33703.1	-1.14444191498403	0.00844331	0.528851	down	2:+:112540804-112544059	MERGE.33703	2:+:112540804-112544059	-	-	-	-	-	-	1.41407	0.6874	0.93737	2.33398	1.89817	2.77942
MERGE.19008.5	-11.3196919883204	1.96178e-07	0.00344305	down	14:-:65052064-65149855	MERGE.19008	14:-:65048699-65149855	-	-	-	-	-	-	0	0	0	2.77569	2.5764	3.42272
NONMMUT056877.2	1.03283	0.0193641	0.660546	up	6:+:50203199-50206103	MERGE.48588	6:+:50203199-50206103	6:+:50203199-50206103	NONMMUG035305.2	-	-	-	lncRNA	1.72808	1.20057	0.88647	0.56414	0.71549	0.6589
MERGE.63508.1	-1.61001223675063	0.0115994	0.584019	down	X:-:104151439-104152282	MERGE.63508	X:-:104151439-104152282	-	-	-	-	-	-	0.91507	0.30896	0.64978	1.34669	2.10387	2.10115
NONMMUT027242.2	1.47631	0.0103729	0.568498	up	16:-:73905889-73909933	MERGE.23888	16:-:73891847-74411825	16:-:73905889-73909933	NONMMUG016907.2	-	-	-	lncRNA	2.55922	1.29198	1.70653	1.14357	0.44238	0.63326
NONMMUT145782.1	-1.19063908576771	0.0273226	0.714902	down	19:+:5603521-5607502	MERGE.29258	19:+:5603521-5607502	19:+:5603521-5607502	NONMMUG091788.1	-	-	-	lncRNA	0.38844	0.50146	0.46771	1.73338	0.88942	0.89318
NONMMUT111880.1	-1.00216589290623	0.0162984	0.638839	down	3:+:106055414-106056353	NONMMUG070039.1	3:+:106055414-106056353	3:+:106055414-106056353	NONMMUG070039.1	-	-	-	lncRNA	0.90062	0.72819	0.69757	1.7575	1.55221	1.63202
MERGE.51423.6	6.60742	0.0398205	0.730234	up	7:-:17031350-17054761	MERGE.51423	7:-:17029646-17062427	-	-	-	-	-	-	14.4349	6.60532	3.18972	0.03528	0	11.0624
MERGE.27496.13	-1.01367971632211	0.0333161	0.730234	down	18:+:23415510-23444120	MERGE.27496	18:+:23415135-23661329	-	-	-	-	-	-	3.78008	1.39954	2.29985	6.06129	3.70889	5.52639
MERGE.40548.1	1.45985	0.0110143	0.578309	up	4:-:43724662-43725618	MERGE.40548	4:-:43724662-43725618	-	-	-	-	-	-	2.12619	1.83922	1.37036	0.55241	1.0356	0.52944
MERGE.56524.1	1.28746	0.020338	0.669963	up	8:-:69729256-69730498	MERGE.56524	8:-:69729256-69730498	-	-	-	-	-	-	3.91919	1.97545	1.49626	0.81871	0.96343	1.22287
MERGE.22450.3	1.54196	0.00661111	0.475344	up	16:-:4032875-4077827	MERGE.22450	16:-:4032839-4077827	-	-	-	-	-	-	2.41669	2.5488	3.92399	1.53552	1.06072	0.70288
NONMMUT138769.1	6.74628	0.0151819	0.628516	up	1:+:136692803-136710551	MERGE.2718	1:+:136692803-136726142	1:+:136692803-136710551	NONMMUG001887.3	-	-	-	lncRNA	1.81617	0.65768	0.98297	0	0.87153	0
MERGE.38411.17	-5.45282138127895	0.0174145	0.647989	down	3:-:103749363-103792044	MERGE.38411	3:-:103739815-103792591	-	-	-	-	-	-	0	0.42958	0	0.75377	0.82358	0.53678
MERGE.46768.1	-1.14125670377711	0.019817	0.665073	down	5:-:135515567-135516675	MERGE.46768	5:-:135515567-135516675	-	-	-	-	-	-	5.87931	2.20435	2.54783	8.77121	6.15634	8.16033
NONMMUT013251.2	4.30045	0.000606458	0.156829	up	12:+:4106958-4109204	MERGE.11421	12:+:4082583-4110606	12:+:4106958-4109204	NONMMUG008410.2	-	-	-	lncRNA	2.96781	3.49111	1.25217	0.14704	0.09801	0.12527
MERGE.54275.5	6.03931	0.0145648	0.624453	up	7:-:126491711-126502414	MERGE.54275	7:-:126491708-126503437	-	-	-	-	-	-	1.26974	0.20574	0.46812	0.1509	0	0
MERGE.26222.2	-6.39577326767892	0.0041827	0.39353	down	17:-:55997081-56005570	MERGE.26222	17:-:55997081-56005570	-	-	-	-	-	-	0	0.26314	0	1.97951	1.00013	1.57877
MERGE.41259.1	-1.70154057515572	0.0094971	0.550246	down	4:+:85563971-85565328	MERGE.41259	4:+:85563971-85565328	-	-	-	-	-	-	0.88589	0.32003	0.32483	1.10948	1.66233	1.94844
MERGE.3635.12	7.42622	0.0207549	0.673536	up	1:-:178326737-178337797	MERGE.3635	1:-:178321108-178337797	-	-	-	-	-	-	3.86942	1.89116	1.13832	0	2.2893	0
NONMMUT008064.2	-1.9768539333492	0.0117975	0.587616	down	10:+:127192204-127193642	MERGE.7215	10:+:127192204-127193642	10:+:127192204-127193642	NONMMUG004987.2	-	-	-	lncRNA	0.12386	0.30202	0.13256	0.97355	0.57394	0.72377
MERGE.60593.7	1.79972	0.024387	0.699113	up	9:-:67022606-67049201	MERGE.60593	9:-:67022590-67049406	-	-	-	-	-	-	50.4103	80.2438	61.4629	52.0281	11.5251	10.363
NONMMUT057651.2	1.17275	0.0250266	0.702259	up	6:+:83795059-83805996	MERGE.49234	6:+:83794982-83805996	6:+:83795059-83805996	NONMMUG035799.2	-	-	-	lncRNA	0.88203	0.72329	0.51389	0.39877	0.38236	0.2157
MERGE.1549.14	-9.36954169559239	1.8483e-05	0.0194141	down	1:-:84726210-84839269	MERGE.1549	1:-:84721189-84840516	-	-	-	-	-	-	0	0	0	0.45724	1.40233	0.74385
MERGE.43731.1	-1.1411314346442	0.0298439	0.729786	down	5:+:9267015-9267922	MERGE.43731	5:+:9267015-9267922	-	-	-	-	-	-	2.6335	0.77778	1.28675	3.88632	3.06223	2.74357
NONMMUT005304.2	4.7486	0.0343403	0.730234	up	10:-:39621451-39640707	MERGE.5082	10:-:39620802-39732632	10:-:39621451-39640707	NONMMUG003416.2	-	-	-	lncRNA	0.46608	0.60235	0.64848	0.92625	0	0
NONMMUT054674.2	-1.20877063003019	0.0263478	0.709211	down	5:+:130131327-130131824	MERGE.46622	5:+:130131327-130131824	5:+:130131327-130131824	NONMMUG033905.2	-	-	-	lncRNA	2.23679	0.91633	0.76608	2.86621	2.92987	2.54356
MERGE.9547.3	1.47001	0.00288428	0.338683	up	11:-:78074531-78080366	MERGE.9547	11:-:78073376-78080383	-	-	-	-	-	-	3.98458	1.93411	2.85578	0.95974	1.1384	1.18528
NONMMUT014035.2	-2.10964516451035	0.0295044	0.727848	down	12:+:40789329-40790734	MERGE.12230	12:+:40445952-40858907	12:+:40789329-40790734	NONMMUG008880.2	-	-	-	lncRNA	0.69719	0.47138	0.07632	1.6168	1.21397	1.17119
MERGE.1126.1	-3.55909142009714	0.00316258	0.352286	down	1:+:60705460-60705699	MERGE.1126	1:+:60705460-60705699	-	-	-	-	-	-	0.12377	0.86015	0.89416	7.59943	8.25893	4.92602
MERGE.32931.13	-4.17850451770134	0.0287673	0.724224	down	2:-:73613093-73637562	MERGE.32931	2:-:73610660-73775346	-	-	-	-	-	-	0.03755	0.04121	0	0.86884	1.11372	0.10676
MERGE.48822.1	-1.00475678755438	0.02104	0.67614	down	6:-:59009888-59014167	MERGE.48822	6:-:59009888-59014167	-	-	-	-	-	-	6.13524	2.33293	3.45965	7.49753	7.66717	8.13221
NONMMUT105847.1	-1.41358589137317	0.0388596	0.730234	down	19:-:8496189-8496878	MERGE.29423	19:-:8496189-8496878	19:-:8496189-8496878	NONMMUG066156.1	-	-	-	lncRNA	1.24845	0.29918	0.62202	1.16841	1.77547	2.26413
MERGE.61016.1	-2.32392950692733	0.000868467	0.196105	down	9:+:88563521-88566377	MERGE.61016	9:+:88563521-88566377	-	-	-	-	-	-	4.16405	1.52878	1.34787	10.3437	9.61663	12.7639
MERGE.55640.2	1.38986	0.0291972	0.725532	up	8:-:34135941-34140885	MERGE.55640	8:-:34135572-34147033	-	-	-	-	-	-	6.02784	1.56755	4.5838	1.35863	1.55862	1.42534
NONMMUT079657.1	1.33659	0.0416838	0.730234	up	10:+:3512502-3513513	MERGE.4102	10:+:3512502-3513513	10:+:3512502-3513513	NONMMUG049545.1	-	-	-	lncRNA	1.2328	0.45092	0.51835	0.33955	0.27203	0.1947
MERGE.62573.1	-5.17953172931209	0.000267589	0.0977404	down	X:-:20038027-20038249	MERGE.62573	X:-:20038027-20038249	-	-	-	-	-	-	0.0666	0	0.05346	1.95579	1.23452	2.27209
MERGE.2384.1	-1.16809563302215	0.0107316	0.573388	down	1:-:127643771-127658428	MERGE.2384	1:-:127643771-127658428	-	-	-	-	-	-	1.46213	0.90653	1.0598	3.81849	2.14577	2.23914
MERGE.49299.2	1.82075	0.0248279	0.701103	up	6:-:85334967-85374564	MERGE.49299	6:-:85334962-85374634	-	-	-	-	-	-	1.13414	1.14717	1.44127	0.30575	0.17478	1.01843
MERGE.25076.9	4.10803	0.00692444	0.484495	up	17:-:24443903-24455286	MERGE.25076	17:-:24443778-24470511	-	-	-	-	-	-	2.18616	1.64895	1.69537	0.08793	0.01717	0.81344
NONMMUT136559.1	-2.03429133183613	0.0194528	0.661518	down	X:+:155358204-155359354	MERGE.64171	X:+:155357759-155362901	X:+:155358204-155359354	NONMMUG086236.1	-	-	-	lncRNA	0.50325	0.12272	0.17609	0.55116	1.00456	1.45512
NONMMUT003153.2	-1.00251362769612	0.0402115	0.730234	down	1:-:151965384-151968402	MERGE.2918	1:-:151965384-151968402	1:-:151965384-151968402	NONMMUG002038.2	-	-	-	lncRNA	0.99376	0.3059	0.43044	1.11632	1.07602	1.04893
MERGE.31669.18	4.5793	0.044651	0.730234	up	2:+:26583880-26592676	MERGE.31669	2:+:26580014-26636497	-	-	-	-	-	-	2.86485	6.29545	5.20354	0	1.57224	1.18173
NONMMUT083714.1	2.20337	0.0144933	0.624168	up	11:+:57560496-57561959	MERGE.8625	11:+:57560496-57561959	11:+:57560496-57561959	NONMMUG052129.1	-	-	-	lncRNA	1.34929	0.33397	0.76549	0.18958	0.17864	0.10575
MERGE.26128.1	-1.01905344739395	0.0363483	0.730234	down	17:+:50640688-50641419	MERGE.26128	17:+:50640688-50641419	-	-	-	-	-	-	1.11595	0.65309	0.84693	1.87774	1.35392	2.42263
MERGE.29529.1	1.01901	0.0292554	0.726531	up	19:-:10498668-10499249	MERGE.29529	19:-:10498668-10499249	-	-	-	-	-	-	2.47538	1.92284	1.90508	0.81751	1.27715	1.23332
MERGE.1843.1	2.98548	0.0141875	0.619236	up	1:-:93139390-93148597	MERGE.1843	1:-:93139390-93148597	-	-	-	-	-	-	1.1307	0.15575	0.58005	0.02871	0.07474	0.11311
NONMMUT084108.1	3.93284	0.0407068	0.730234	up	11:+:84870923-84871631	MERGE.9834	11:+:84868996-84871909	11:+:84870923-84871631	NONMMUG007068.2	-	-	-	lncRNA	1.01728	0.79999	0.44912	0.99576	0	0
MERGE.39953.2	-1.11646567971133	0.00224314	0.300023	down	4:+:12235023-12238038	MERGE.39953	4:+:12234733-12238046	-	-	-	-	-	-	7.50001	8.9593	6.87025	16.7922	16.3435	19.1422
NONMMUT011500.2	-1.05958907069857	0.0183714	0.656166	down	11:-:90513384-90516361	MERGE.10086	11:-:90513384-90516361	11:-:90513384-90516361	NONMMUG007269.2	-	-	-	lncRNA	0.5137	0.42322	0.52445	0.82103	1.3959	1.13899
MERGE.1497.1	-1.24754264664618	0.0363658	0.730234	down	1:-:80750918-80751669	MERGE.1497	1:-:80750918-80751669	-	-	-	-	-	-	2.11329	0.57793	0.84026	3.0932	1.83044	2.73252
NONMMUT077262.1	-4.82821443379467	0.0078968	0.512653	down	1:-:6181319-6182236	NONMMUG047924.1	1:-:6180675-6182236	1:-:6181319-6182236	NONMMUG047924.1	-	-	-	lncRNA	0	0.21304	0	0.56148	0.5248	0.85857
MERGE.6955.1	-1.35731182114982	0.00990875	0.560208	down	10:-:117813870-117845868	MERGE.6955	10:-:117813870-117846035	-	-	-	-	-	-	7.67935	5.81903	16.208	21.6919	23.4665	25.0787
MERGE.26902.1	-1.23764509889766	0.0439841	0.730234	down	17:+:85166568-85167318	MERGE.26902	17:+:85166568-85167318	-	-	-	-	-	-	0.8504	1.12846	0.4445	1.72464	1.64959	2.47379
MERGE.10628.3	7.89946	0.0164189	0.639008	up	11:-:103331498-103363464	MERGE.10628	11:-:103331497-103412687	-	-	-	-	-	-	9.36355	11.5132	10.8132	10.2181	0	0.00319
NONMMUT083709.1	1.08474	0.048173	0.730234	up	11:+:57546206-57549608	MERGE.8620	11:+:57546206-57549608	11:+:57546206-57549608	NONMMUG052126.1	-	-	-	lncRNA	1.89418	0.56193	1.21919	0.52819	0.69573	0.45494
MERGE.61105.1	1.8092	0.0355899	0.730234	up	9:-:90088207-90100457	MERGE.61105	9:-:90088207-90114774	-	-	-	-	-	-	6.1008	3.8695	4.00219	4.21554	0.72139	0.79991
MERGE.32485.1	-1.04917050563256	0.0257699	0.706172	down	2:-:60444749-60445611	MERGE.32485	2:-:60444749-60445611	-	-	-	-	-	-	1.99637	0.88129	1.74066	2.69535	3.19001	3.81622
NONMMUT114379.1	-1.65902868754292	0.0228651	0.689839	down	3:-:149227445-149228268	MERGE.39546	3:-:149227445-149228268	3:-:149227445-149228268	NONMMUG071734.1	-	-	-	lncRNA	1.20765	0.25053	0.40512	1.26711	1.48674	2.16922
MERGE.53723.1	-2.45466071011775	0.00491901	0.419186	down	7:-:104520195-104520513	MERGE.53723	7:-:104520195-104520513	-	-	-	-	-	-	0.37247	0.27248	0.67272	2.40298	1.8986	3.26489
NONMMUT150197.1	-2.27510329915704	0.00107501	0.212464	down	6:+:129418179-129418772	MERGE.50633	6:+:129418179-129418772	6:+:129418179-129418772	NONMMUG094412.1	-	-	-	lncRNA	0.47507	0.56703	0.58206	3.27072	2.34049	2.96177
MERGE.42009.1	-1.35189521624579	0.00418889	0.39353	down	4:-:118076267-118077423	MERGE.42009	4:-:118076267-118077423	-	-	-	-	-	-	1.12965	0.59161	0.7213	2.10183	1.98681	2.31126
MERGE.20556.2	6.70326	0.0170672	0.645614	up	15:-:36477668-36496734	MERGE.20556	15:-:36475638-36496820	-	-	-	-	-	-	1.40023	3.04108	0.75661	0.55755	0	0
MERGE.43718.1	-1.18325036094319	0.00656464	0.475344	down	5:+:9195808-9198553	MERGE.43718	5:+:9195808-9198553	-	-	-	-	-	-	1.67129	1.08017	0.9074	2.4498	2.93744	3.35714
MERGE.63855.2	5.89109	0.00659272	0.475344	up	X:-:136170081-136172201	MERGE.63855	X:-:136168984-136172342	-	-	-	-	-	-	3.71549	11.3605	2.05822	0.36162	0.03587	0.02751
NONMMUT009432.2	-1.03592497413377	0.0415511	0.730234	down	11:+:44698784-44701066	MERGE.8265	11:+:44698784-44701066	11:+:44698784-44701066	NONMMUG005882.2	-	-	-	lncRNA	0.93681	0.45211	0.57966	1.66146	1.80276	0.84458
NONMMUT132255.1	-1.11229040094849	0.037656	0.730234	down	9:+:32053471-32054219	MERGE.59436	9:+:32053471-32055179	9:+:32053471-32054219	NONMMUG083261.1	-	-	-	lncRNA	2.00278	0.9719	0.6367	2.31155	2.40748	2.61193
MERGE.33143.6	-2.2775459408786	0.0127293	0.602203	down	2:-:84330626-84338218	MERGE.33143	2:-:84330626-84425973	-	-	-	-	-	-	3.48914	1.86671	2.00374	4.60319	16.207	23.4967
MERGE.33143.1	10.66	0.00939226	0.547691	up	2:-:84330626-84425973	MERGE.33143	2:-:84330626-84425973	-	-	-	-	-	-	7.64217	41.4446	40.8875	1.78499	0	0
NONMMUT051210.2	-1.17701128874906	0.0092219	0.543737	down	5:+:9152705-9154837	MERGE.43703	5:+:9100668-9250044	5:+:9152705-9154837	NONMMUG031739.2	-	-	-	lncRNA	1.74642	2.01246	1.4515	4.67594	4.34002	3.64673
NONMMUT016669.2	-1.05169941428928	0.0300079	0.730234	down	13:-:23607413-23608855	MERGE.14706	13:-:23607413-23608855	13:-:23607413-23608855	NONMMUG010488.2	-	-	-	lncRNA	0.57639	0.40659	0.28917	1.0716	0.82036	0.79004
MERGE.16519.1	-2.39369734850671	0.0102969	0.56687	down	13:-:95812887-95813364	MERGE.16519	13:-:95812887-95813364	-	-	-	-	-	-	0.77679	0.2273	0.22448	1.16127	2.10217	2.59109
NONMMUT079153.1	1.0469	0.0347391	0.730234	up	1:-:161231849-161234492	MERGE.3142	1:-:161231849-161234492	1:-:161231849-161234492	NONMMUG049246.1	-	-	-	lncRNA	1.14032	0.55476	0.64481	0.3799	0.27592	0.53231
MERGE.11829.1	-2.47421377508913	0.00357437	0.368046	down	12:-:22118035-22118660	MERGE.11829	12:-:22118035-22118660	-	-	-	-	-	-	0.33216	0.24299	0.20949	1.11896	1.45125	2.15837
MERGE.51688.2	-8.5409078017694	0.014381	0.622026	down	7:-:27305140-27333613	MERGE.51688	7:-:27305136-27337692	-	-	-	-	-	-	0	0	8.57158	10.8535	8.69914	10.7466
NONMMUT068577.2	1.28437	0.0446762	0.730234	up	9:+:35218539-35220354	MERGE.59516	9:+:35200047-35247973	9:+:35218539-35220354	NONMMUG042451.2	-	-	-	lncRNA	1.63571	0.88547	0.94537	0.98977	0.25771	0.42626
NONMMUT111250.1	1.0266	0.0462197	0.730234	up	3:+:64041845-64049535	MERGE.37183	3:+:64041845-64049535	3:+:64041845-64049535	NONMMUG069600.1	-	-	-	lncRNA	0.76666	0.356	0.5007	0.16841	0.32573	0.36966
NONMMUT101333.1	-1.11152139253519	0.020399	0.670642	down	17:+:66246553-66248443	NONMMUG063401.1	17:+:66246553-66248443	17:+:66246553-66248443	NONMMUG063401.1	-	-	-	lncRNA	0.48696	0.29303	0.23327	0.81773	0.6988	0.6773
NONMMUT011072.2	4.14755	0.0259194	0.706172	up	11:-:82779601-82781042	MERGE.9714	11:-:82779601-82781853	11:-:82779601-82781042	NONMMUG006992.2	-	-	-	lncRNA	0.67117	1.15619	1.32082	0.75137	0.02007	0
NONMMUT047958.2	-1.02211522091567	0.0444243	0.730234	down	4:+:85851723-85853869	MERGE.41289	4:+:85851723-85853869	4:+:85851723-85853869	NONMMUG029741.2	-	-	-	lncRNA	0.21445	0.32894	0.33318	0.65867	0.73729	0.51787
NONMMUT015353.2	1.23483	0.0466283	0.730234	up	12:+:99346398-99361827	MERGE.13500	12:+:99340971-99361827	12:+:99346398-99361827	NONMMUG009736.2	-	-	-	lncRNA	0.9084	1.29583	0.83856	0.42438	0.37885	0.53801
MERGE.50766.6	2.68371	0.0277162	0.716646	up	6:-:136813985-136828136	MERGE.50766	6:-:136813654-136828252	-	-	-	-	-	-	2.03354	1.5653	10.6497	1.36154	0.29163	0.37646
NONMMUT066382.2	3.77519	0.0227525	0.689264	up	8:-:84210944-84212031	MERGE.57084	8:-:84210678-84237055	8:-:84210944-84212031	NONMMUG041088.2	-	-	-	lncRNA	9.81507	13.5213	11.9879	10.1917	0.21508	0.27166
MERGE.23991.1	2.43002	0.0403889	0.730234	up	16:-:82239182-82240345	MERGE.23991	16:-:82239182-82240345	-	-	-	-	-	-	2.78161	5.18981	3.85114	3.84911	0.26016	0.38692
NONMMUT115953.1	3.82822	0.0317161	0.730234	up	4:+:145026732-145027981	MERGE.42986	4:+:145026732-145027981	4:+:145026732-145027981	NONMMUG072691.1	-	-	-	lncRNA	0.239	0.82424	0.87703	0	0	0.32355
NONMMUT048504.2	-1.05135918399904	0.00868802	0.531683	down	4:+:106962919-106964275	MERGE.41695	4:+:106962919-106964275	4:+:106962919-106964275	NONMMUG030106.2	-	-	-	lncRNA	3.74317	2.33794	2.22277	5.51251	5.52827	7.15644
MERGE.21862.1	1.22627	0.0235339	0.693117	up	15:-:86212796-86213423	MERGE.21862	15:-:86212796-86213423	-	-	-	-	-	-	2.03391	2.14532	1.3289	0.8839	0.87674	0.67234
NONMMUT093910.1	1.57259	0.0307658	0.730234	up	14:-:16921012-16922397	MERGE.17338	14:-:16921012-16922397	14:-:16921012-16922397	NONMMUG058595.1	-	-	-	lncRNA	1.18947	0.3214	0.57632	0.18118	0.20856	0.2234
MERGE.52081.1	-1.22831365541445	0.0335307	0.730234	down	7:+:35932910-35934883	MERGE.52081	7:+:35932910-35934883	-	-	-	-	-	-	0.36115	0.77057	0.38653	1.23192	1.32489	1.12652
NONMMUT145181.1	-7.1749384545477	3.58247e-05	0.0291219	down	17:-:53701993-53702374	MERGE.26166	17:-:53701993-53702972	17:-:53701993-53702374	NONMMUG091434.1	-	-	-	lncRNA	0	0	0	1.52231	2.59443	4.2002
MERGE.23508.5	2.37331	0.0310838	0.730234	up	16:-:43861409-43889656	MERGE.23508	16:-:43861353-43926809	-	-	-	-	-	-	0.51703	1.29524	2.88167	0.19966	0.18534	0.47608
MERGE.55750.1	1.24642	0.0027262	0.327788	up	8:-:31809384-31813324	MERGE.55750	8:-:31809384-31813324	-	-	-	-	-	-	2.98101	2.14212	2.22954	0.94571	1.08973	1.30708
MERGE.32310.1	-5.33392029712501	0.000356844	0.116466	down	2:-:47617952-47618231	MERGE.32310	2:-:47617952-47618231	-	-	-	-	-	-	0	0.07761	0.08516	2.12406	2.16305	2.81487
NONMMUT151460.1	6.01994	2.52265e-05	0.0234653	up	7:-:18993234-19001195	MERGE.51460	7:-:18993234-19001222	7:-:18993234-19001195	NONMMUG037352.3	-	-	-	lncRNA	1.5829	0.73912	0.72993	0	0	0
MERGE.742.1	-6.10408931347728	0.000208436	0.0829163	down	1:-:45788541-45788896	MERGE.742	1:-:45788541-45788896	-	-	-	-	-	-	0.08344	0	0	2.07898	2.04927	3.32091
NONMMUT059853.2	8.48776	6.25079e-06	0.00973909	up	7:-:6705894-6707223	MERGE.51210	7:-:6703892-6730431	7:-:6705894-6707223	NONMMUG037170.2	-	-	-	lncRNA	38.6383	21.6483	29.4378	0.08943	0.07245	0.07408
NONMMUT019455.2	-1.36561118771928	0.013908	0.61557	down	13:+:117672848-117675012	MERGE.17050	13:+:117672848-117675012	13:+:117672848-117675012	NONMMUG012071.2	-	-	-	lncRNA	0.21953	0.14554	0.20375	0.61656	0.36876	0.57858
NONMMUT127622.1	-1.08415573258936	0.0112109	0.579911	down	7:-:109648561-109649265	MERGE.53850	7:-:109648561-109649265	7:-:109648561-109649265	NONMMUG080116.1	-	-	-	lncRNA	2.48591	2.0343	3.17924	5.81147	6.57981	5.07076
NONMMUT082231.1	1.21407	0.0144917	0.624168	up	10:-:78260268-78261847	MERGE.5934	10:-:78248274-78352489	10:-:78260268-78261847	NONMMUG004072.3	-	-	-	lncRNA	1.99284	0.82519	1.43368	0.68591	0.55756	0.57901
MERGE.23182.1	1.1305	0.0364304	0.730234	up	16:-:30002159-30003783	MERGE.23182	16:-:30002159-30003783	-	-	-	-	-	-	2.78766	0.99624	1.34995	0.55306	0.95719	0.81415
NONMMUT032158.2	1.22773	0.0342586	0.730234	up	18:-:42273869-42275522	MERGE.28054	18:-:42273869-42275522	18:-:42273869-42275522	NONMMUG019795.2	-	-	-	lncRNA	0.65246	0.57276	0.52374	0.24279	0.40679	0.16862
NONMMUT097489.1	1.05361	0.0332535	0.730234	up	15:-:83280734-83281640	MERGE.21786	15:-:83280734-83281640	15:-:83280734-83281640	NONMMUG060959.1	-	-	-	lncRNA	0.94976	0.64687	0.80182	0.33515	0.39458	0.45001
MERGE.63511.1	-1.15219473812718	0.0247644	0.700154	down	X:-:104190428-104191637	MERGE.63511	X:-:104190428-104191637	-	-	-	-	-	-	1.89029	0.6106	0.85721	2.27191	2.07042	2.69855
NONMMUT021964.2	-1.35819794329047	0.00326279	0.353204	down	14:-:98164000-98166085	MERGE.19492	14:-:98164000-98166085	14:-:98164000-98166085	NONMMUG013642.2	-	-	-	lncRNA	3.68815	2.24488	2.01179	5.86058	6.81645	8.66321
MERGE.32607.1	-1.31199792827383	0.0250041	0.702016	down	2:-:64996558-64997244	MERGE.32607	2:-:64996558-64997244	-	-	-	-	-	-	2.81048	1.26521	2.27336	5.80983	3.24587	8.03077
MERGE.21814.4	2.89439	0.00698153	0.486877	up	15:+:85671613-85706483	MERGE.21814	15:+:85653460-85707524	-	-	-	-	-	-	5.17289	3.84028	4.87199	1.88989	0.80421	0.17264
MERGE.20061.1	1.22672	0.00576564	0.451039	up	15:+:10725551-10728341	MERGE.20061	15:+:10725551-10728341	-	-	-	-	-	-	2.28824	1.26908	2.09737	0.81448	0.95679	0.76146
NONMMUT006802.2	1.04314	0.037822	0.730234	up	10:-:91118291-91118536	MERGE.6457	10:-:91118291-91118536	10:-:91118291-91118536	NONMMUG004383.2	-	-	-	lncRNA	23.0029	33.2575	26.3159	22.2422	11.5826	11.0421
MERGE.31468.5	-1.2007466359362	0.0352422	0.730234	down	2:-:20847940-20869004	MERGE.31468	2:-:20847655-20968881	-	-	-	-	-	-	6.06878	11.0238	3.11603	15.7792	12.4229	14.1593
NONMMUT082932.1	-1.42590044427022	0.0390255	0.730234	down	10:-:125358856-125359865	MERGE.7170	10:-:125358856-125359865	10:-:125358856-125359865	NONMMUG051609.1	-	-	-	lncRNA	0.11764	0.16136	0.24789	0.37948	0.59966	0.52953
MERGE.63455.3	-3.93029622956121	0.0304608	0.730234	down	X:-:103163429-103165182	MERGE.63455	X:-:103162856-103165407	-	-	-	-	-	-	12.9386	0.76191	0.09516	14.1131	17.2257	14.6842
MERGE.60982.1	-1.61587374443683	0.0087781	0.534597	down	9:+:87581677-87582163	MERGE.60982	9:+:87581677-87582163	-	-	-	-	-	-	0.82343	0.35696	0.44065	1.6283	1.80894	1.3872
NONMMUT146067.1	-3.71849039325409	0.00794102	0.513918	down	19:-:27201082-27201345	NONMMUG091946.1	19:-:27201082-27201345	19:-:27201082-27201345	NONMMUG091946.1	-	-	-	lncRNA	0	0	0.13548	1.00124	0.2607	0.58643
MERGE.7164.1	-1.0199215176313	0.0156501	0.632248	down	10:-:123136945-123141603	MERGE.7164	10:-:123136945-123141603	-	-	-	-	-	-	3.5529	1.69269	2.40143	4.26883	5.16244	6.73862
MERGE.717.1	2.26456	0.0341122	0.730234	up	1:-:44195513-44196163	MERGE.717	1:-:44195513-44196163	-	-	-	-	-	-	3.10278	0.56745	0.93399	0.16241	0.21144	0.36753
MERGE.2374.1	-1.43139963819627	0.00273723	0.32857	down	1:-:127537986-127540925	MERGE.2374	1:-:127537986-127540925	-	-	-	-	-	-	1.19728	0.53216	0.66504	2.1398	2.08346	2.317
MERGE.64384.6	8.49966	0.0112733	0.579911	up	Y:-:1260874-1281611	MERGE.64384	Y:-:1260771-1286629	-	-	-	-	-	-	6.85575	5.29769	5.42748	3.91221	0	0
NONMMUT063520.2	-1.21642479018907	0.0346477	0.730234	down	7:+:122463438-122466160	MERGE.54199	7:+:122463438-122466160	7:+:122463438-122466160	NONMMUG039239.2	-	-	-	lncRNA	0.57816	0.17556	0.29773	1.04838	0.551	0.74946
MERGE.18412.9	5.69239	0.0190764	0.659173	up	14:-:52007910-52014033	MERGE.18412	14:-:52006077-52020733	-	-	-	-	-	-	1.34829	0.96706	0.21984	0.00937	0.0781	0
MERGE.44575.18	5.72331	0.0206438	0.67264	up	5:-:43758764-43786103	MERGE.44575	5:-:43741625-43821638	-	-	-	-	-	-	0.78726	1.78391	1.46426	0.92267	0	0
MERGE.61284.10	7.8796	0.00151947	0.246998	up	9:-:97073580-97111033	MERGE.61284	9:-:97046554-97112279	-	-	-	-	-	-	2.18038	3.0176	1.20753	0.05328	0	0.02128
MERGE.16659.1	-7.16095703668287	0.0369318	0.730234	down	13:-:100617049-100650984	MERGE.16659	13:-:100617049-100651051	-	-	-	-	-	-	0	0	0	0.01881	0.43597	4.67809
MERGE.53081.5	5.73847	0.0345982	0.730234	up	7:-:79449382-79466180	MERGE.53081	7:-:79446231-79466362	-	-	-	-	-	-	0.69018	0.24019	1.15644	0.62012	0	0
NONMMUT021958.2	-1.05819051013813	0.0302381	0.730234	down	14:-:98044540-98046287	MERGE.19478	14:-:98044540-98046287	14:-:98044540-98046287	NONMMUG013636.2	-	-	-	lncRNA	0.98562	1.268	1.19358	1.94314	2.52776	3.59105
NONMMUT048645.2	-1.41196286983032	0.0217542	0.681365	down	4:-:109189735-109190829	MERGE.41791	4:-:109189735-109190829	4:-:109189735-109190829	NONMMUG030195.2	-	-	-	lncRNA	1.41063	0.33736	0.52261	2.00358	1.55876	1.65807
MERGE.29134.1	-6.09513854206347	0.000468161	0.135917	down	19:-:4821697-4822259	MERGE.29134	19:-:4821697-4822259	-	-	-	-	-	-	0	0	0.10588	1.26765	2.27377	1.59993
NONMMUT107482.1	-1.15095977696821	0.0273784	0.715492	down	2:+:85151624-85193326	MERGE.33193	2:+:85136225-85193326	2:+:85151624-85193326	NONMMUG023660.2	-	-	-	lncRNA	0.53255	0.22726	0.33249	0.88197	0.75405	0.71493
NONMMUT117924.1	-1.01168918401782	0.0165741	0.640648	down	5:+:9182535-9183840	MERGE.43715	5:+:9181841-9183840	5:+:9182535-9183840	NONMMUG073990.1	-	-	-	lncRNA	2.62701	1.53907	1.46973	3.20796	4.05779	4.70941
NONMMUT061780.2	1.98265	0.0131967	0.605781	up	7:-:61916050-61929677	MERGE.52693	7:-:61704519-62091267	7:-:61916050-61929677	NONMMUG038184.3	-	-	-	lncRNA	0.67594	1.17326	1.86453	0.22966	0.3474	0.37268
NONMMUT140520.1	1.78122	0.00813699	0.521725	up	11:+:76494883-76496102	MERGE.9459	11:+:76494819-76496438	11:+:76494883-76496102	NONMMUG052284.2	-	-	-	lncRNA	2.91645	1.61987	2.15321	1.21751	0.38375	0.59709
MERGE.59017.1	-2.4481284236703	0.000559799	0.150324	down	8:+:121982718-121986199	MERGE.59017	8:+:121982718-121986199	-	-	-	-	-	-	0.52465	0.51798	0.23968	2.31534	2.22563	2.58286
NONMMUT144739.1	2.3503	0.0156365	0.632225	up	16:-:97944469-97945001	MERGE.24377	16:-:97944469-97962621	16:-:97944469-97945001	NONMMUG091146.1	-	-	-	lncRNA	3.26026	2.48692	2.14733	0.22317	0.36155	1.7956
MERGE.28391.1	-1.15517353092772	0.0400805	0.730234	down	18:+:59253490-59254097	MERGE.28391	18:+:59253490-59254097	-	-	-	-	-	-	1.51454	0.58971	0.98044	2.10854	3.28274	1.5741
MERGE.13295.1	1.45829	0.0282779	0.720501	up	12:+:86895974-86896467	MERGE.13295	12:+:86895974-86896467	-	-	-	-	-	-	4.78039	2.28737	1.66524	1.3912	0.66874	1.02566
MERGE.40447.3	-3.94431070462396	0.048964	0.730234	down	4:+:41904057-42115917	MERGE.40447	4:+:41903610-42256825	-	-	-	-	-	-	0	0	1.59619	0.93935	1.00108	0.76769
NONMMUT131714.1	-1.20539826988856	0.00898402	0.540509	down	8:-:115547091-115550555	MERGE.58249	8:-:115547091-115550555	8:-:115547091-115550555	NONMMUG082896.1	-	-	-	lncRNA	0.3611	0.27045	0.24845	0.58145	0.76494	0.83102
NONMMUT086482.1	-1.66493157260107	0.00754481	0.503078	down	12:+:20208913-20211477	MERGE.11769	12:+:20208913-20400713	12:+:20208913-20211477	NONMMUG053857.1	-	-	-	lncRNA	0.9033	0.2711	0.29747	1.33967	1.23964	1.62417
NONMMUT029642.2	-1.20251867629206	0.0292986	0.726531	down	17:+:39843013-39846341	MERGE.25851	17:+:39842997-40064883	17:+:39843013-39846341	NONMMUG018330.3	-	-	-	lncRNA	601.828	1669.79	1665.11	2999.91	2602.55	1135.17
NONMMUT098363.1	-3.82502805434353	0.00574297	0.450529	down	16:+:40024741-40025393	NONMMUG061469.1	16:+:40024741-40025393	16:+:40024741-40025393	NONMMUG061469.1	-	-	-	lncRNA	0	0.06655	0.07303	0.64766	0.50591	0.53883
MERGE.5481.7	-1.42964429168738	0.0258228	0.706172	down	10:-:60193131-60194239	MERGE.5481	10:-:60181532-60219260	-	-	-	-	-	-	0.86386	0.4213	1.26521	3.35804	1.69954	1.867
MERGE.20774.1	-3.85554454305507	0.000682743	0.170884	down	15:-:49326701-49327093	MERGE.20774	15:-:49326701-49327093	-	-	-	-	-	-	0.11338	0.08294	0.18202	2.15229	2.06648	1.64738
NONMMUT019035.2	-1.8195983449751	0.0116569	0.584969	down	13:-:105019031-105020686	MERGE.16797	13:-:105019031-105020686	13:-:105019031-105020686	NONMMUG011857.2	-	-	-	lncRNA	0.23319	0.12466	0.14399	0.38308	0.68159	0.8159
MERGE.55624.18	-3.09871745213705	0.000155099	0.0682913	down	8:-:33784072-33800393	MERGE.55624	8:-:33781982-33929863	-	-	-	-	-	-	0.11689	0.07126	0.16889	0.97771	1.01828	1.10025
MERGE.7738.1	-1.05298648289386	0.0289389	0.724224	down	11:-:18911747-18917271	MERGE.7738	11:-:18911747-18917271	-	-	-	-	-	-	3.89789	1.46505	1.54934	3.84412	4.7112	5.29603
NONMMUT027419.2	1.09336	0.0365059	0.730234	up	16:-:78340756-78343468	MERGE.23968	16:-:78340756-78343468	16:-:78340756-78343468	NONMMUG016995.2	-	-	-	lncRNA	3.09309	0.92911	1.6611	0.82816	0.85745	0.86117
NONMMUT093332.1	1.19012	0.0416608	0.730234	up	14:+:78733330-78734861	NONMMUG058194.1	14:+:78733330-78734861	14:+:78733330-78734861	NONMMUG058194.1	-	-	-	lncRNA	1.06642	0.59573	0.94163	0.2243	0.45823	0.57878
NONMMUT014894.2	-3.37711429060551	0.0330798	0.730234	down	12:-:81504215-81506622	MERGE.13020	12:-:81358860-81532911	12:-:81504215-81506622	NONMMUG089462.1	-	-	-	lncRNA	1.40011	0.02256	0.02476	0.77937	0.72597	1.22741
NONMMUT021960.2	-1.14800508097476	0.00738826	0.498976	down	14:-:98095636-98101191	MERGE.19483	14:-:98095636-98101191	14:-:98095636-98101191	NONMMUG013638.2	-	-	-	lncRNA	5.02561	2.61456	3.19082	6.47261	8.0865	10.0643
NONMMUT138770.1	5.52127	0.0145868	0.624453	up	1:+:136692845-136726095	MERGE.2718	1:+:136692803-136726142	1:+:136692845-136726095	NONMMUG001887.3	-	-	-	lncRNA	1.2359	0.47557	0.7971	0.54035	0	0
MERGE.55555.5	5.54036	0.0384435	0.730234	up	8:-:27141958-27174498	MERGE.55555	8:-:27138773-27174646	-	-	-	-	-	-	1.74066	5.68866	0.53489	0.23194	0.23526	0
MERGE.15812.1	1.64562	0.00627264	0.464466	up	13:-:65717786-65718446	MERGE.15812	13:-:65717786-65718446	-	-	-	-	-	-	3.90968	1.5451	2.38082	0.91975	0.87462	0.63877
MERGE.31820.6	1.38524	0.0235384	0.693117	up	2:-:30093649-30124579	MERGE.31820	2:-:30090944-30124585	-	-	-	-	-	-	1.28741	0.45328	0.82338	0.20118	0.45786	0.36698
MERGE.25345.16	-4.25561630168857	0.0361212	0.730234	down	17:+:29038486-29044026	MERGE.25345	17:+:29032673-29049456	-	-	-	-	-	-	0.39329	0.00234	0.0154	0.16503	0.69343	0.83325
MERGE.24311.1	-1.04579812645241	0.0175135	0.649304	down	16:-:95209608-95212250	MERGE.24311	16:-:95209608-95212250	-	-	-	-	-	-	1.74766	0.76462	0.93374	2.09522	2.25509	2.9235
MERGE.7400.7	-3.12946028761775	0.0234142	0.693117	down	11:+:3124110-3159576	MERGE.7400	11:+:3123861-3160339	-	-	-	-	-	-	0.02037	0.0149	0.40885	0.67079	0.52869	0.5985
MERGE.6629.1	4.31421	0.00935462	0.546342	up	10:+:99636321-99636662	MERGE.6629	10:+:99636321-99636662	-	-	-	-	-	-	2.43195	0.60361	0.38346	0	0	0.16461
NONMMUT004844.2	-1.04962822315194	0.0100903	0.563121	down	10:+:18419461-18423368	MERGE.4623	10:+:18318721-18533892	10:+:18419461-18423368	NONMMUG003118.2	-	-	-	lncRNA	0.66128	0.40591	0.46676	1.12279	0.92635	1.33613
NONMMUT114374.1	-1.05358593351177	0.0341036	0.730234	down	3:-:149198066-149198792	MERGE.39538	3:-:149198066-149198792	3:-:149198066-149198792	NONMMUG071729.1	-	-	-	lncRNA	1.00105	0.40351	0.73796	1.45435	1.32537	1.56812
MERGE.10767.11	-1.33704365393914	0.0131235	0.604826	down	11:-:107319889-107470825	MERGE.10767	11:-:107207892-107470825	-	-	-	-	-	-	1.29848	0.47683	0.44018	1.67104	1.84107	1.7501
MERGE.7658.8	8.16709	0.00886586	0.537317	up	11:-:12236701-12309681	MERGE.7658	11:-:12236608-12464960	-	-	-	-	-	-	3.23192	5.70346	6.4537	1.87421	0	0
MERGE.57772.1	3.18436	0.0272256	0.714183	up	8:-:109662918-109693247	MERGE.57772	8:-:109662918-109693260	-	-	-	-	-	-	1.38499	0.93335	0.90972	1.02143	0.03775	0.04274
NONMMUT142800.1	-3.10447992868764	0.0246969	0.699671	down	13:-:58358678-58358886	NONMMUG089905.1	13:-:58356334-58359139	13:-:58358678-58358886	NONMMUG089905.1	-	-	-	lncRNA	0	0	0.22817	0.88531	0.3293	0.40405
NONMMUT098356.1	-5.52676515011844	0.00257106	0.317296	down	16:+:39997931-39998677	NONMMUG061464.1	16:+:39997931-39998677	16:+:39997931-39998677	NONMMUG061464.1	-	-	-	lncRNA	0.03977	0	0	0.7254	0.33168	1.90296
NONMMUT069867.2	-3.46845113476875	0.0164686	0.639217	down	9:-:70483235-70486439	MERGE.60629	9:-:70425424-70503725	9:-:70483235-70486439	NONMMUG043247.2	-	-	-	lncRNA	0.13439	0.06102	1.74461	3.88038	2.29773	2.78852
MERGE.10851.1	-1.29434344900252	0.0247517	0.700067	down	11:-:108263712-108265726	MERGE.10851	11:-:108263712-108265726	-	-	-	-	-	-	4.34144	1.75781	2.49685	4.75528	6.27788	11.8113
NONMMUT066308.2	1.48756	0.00381801	0.376499	up	8:+:81964592-81967342	MERGE.56996	8:+:81964592-81967342	8:+:81964592-81967342	NONMMUG041042.2	-	-	-	lncRNA	2.68324	1.59559	1.93285	0.687	0.62045	1.11019
NONMMUT104707.1	1.64588	0.0109799	0.577736	up	18:-:62126242-62127291	MERGE.28514	18:-:62126242-62127291	18:-:62126242-62127291	NONMMUG065507.1	-	-	-	lncRNA	3.02704	1.00372	1.35118	0.50348	0.65547	0.45574
MERGE.46394.3	-2.22118993495548	0.0268369	0.712324	down	5:-:123511705-123573038	MERGE.46394	5:-:123509765-123573038	-	-	-	-	-	-	0.87298	0.10872	0.08108	1.17488	0.78767	0.97767
NONMMUT095726.1	6.39136	0.0116012	0.584019	up	15:+:39179435-39181616	MERGE.20640	15:+:39179435-39181616	15:+:39179435-39181616	NONMMUG014390.2	-	-	-	lncRNA	2.04883	2.00171	1.44792	1.20535	0	0
MERGE.56044.7	3.90179	0.00188438	0.279617	up	8:-:45395878-45411080	MERGE.56044	8:-:45395665-45411080	-	-	-	-	-	-	0.56171	1.23273	0.96727	0.02792	0.1396	0.0565
MERGE.8266.1	-1.0869274788799	0.0153817	0.630645	down	11:+:44709222-44712259	MERGE.8266	11:+:44709222-44712259	-	-	-	-	-	-	3.22663	1.42339	1.44416	3.82397	4.12312	4.96169
MERGE.19138.1	2.77041	0.0285016	0.722145	up	14:-:70154405-70176819	MERGE.19138	14:-:70154405-70177681	-	-	-	-	-	-	1.58911	0.2232	0.17348	0.05818	0.06733	0.05507
MERGE.15504.1	-1.06107966263794	0.0406934	0.730234	down	13:+:55746554-55747409	MERGE.15504	13:+:55746554-55747409	-	-	-	-	-	-	2.04739	1.19312	0.77995	2.53211	2.29951	3.58435
NONMMUT027249.2	-1.00157632157137	0.0369224	0.730234	down	16:-:74188831-74192499	MERGE.23896	16:-:74188831-74192499	16:-:74188831-74192499	NONMMUG016911.2	-	-	-	lncRNA	0.54649	0.29909	0.31519	0.58355	0.7766	1.12779
MERGE.14535.6	2.06423	0.0376775	0.730234	up	13:-:17717395-17804651	MERGE.14535	13:-:17710315-17805097	-	-	-	-	-	-	2.43075	2.45724	0.41174	0.41806	0.37862	0.25163
MERGE.20592.2	1.75836	0.028647	0.723495	up	15:-:38294413-38300706	MERGE.20592	15:-:38291463-38300706	-	-	-	-	-	-	2.43399	0.50873	0.73766	0.48622	0.211	0.27066
MERGE.2929.1	-1.02096528277363	0.0155421	0.632225	down	1:-:152075449-152077319	MERGE.2929	1:-:152075449-152077319	-	-	-	-	-	-	1.77815	0.76653	0.99404	2.38757	2.29537	2.5576
NONMMUT082012.1	-3.6620603864936	0.031456	0.730234	down	10:-:60152844-60160924	MERGE.5468	10:-:60152844-60162098	10:-:60152844-60160924	NONMMUG003734.3	-	-	-	lncRNA	0	0	0.28786	0.90414	0.22157	0.4531
NONMMUT109868.1	1.50826	0.00995201	0.560891	up	2:-:145671162-145672008	MERGE.34665	2:-:145671162-145672008	2:-:145671162-145672008	NONMMUG068715.1	-	-	-	lncRNA	2.92837	1.39821	1.49203	0.96743	0.53629	0.56497
MERGE.13249.2	-9.94143583339215	4.75659e-07	0.0035573	down	12:-:85815659-85824512	MERGE.13249	12:-:85815448-85824550	-	-	-	-	-	-	0	0	0	6.6362	6.29918	8.42373
MERGE.59495.1	1.55476	0.0147215	0.625329	up	9:-:34917143-34917686	MERGE.59495	9:-:34917143-34917686	-	-	-	-	-	-	2.6756	1.49793	1.13962	0.53449	0.58197	0.62093
MERGE.26787.9	-2.1716552296758	0.000738646	0.178197	down	17:-:80201338-80207296	MERGE.26787	17:-:80200080-80207305	-	-	-	-	-	-	0.71365	0.74905	0.91326	3.03719	5.09952	3.76361
MERGE.37815.4	7.49784	0.0149048	0.626225	up	3:-:88908266-88913816	MERGE.37815	3:-:88905107-88913999	-	-	-	-	-	-	4.01805	5.86876	3.0943	0	0	4.00958
NONMMUT107798.1	1.58563	0.0313763	0.730234	up	2:+:118585277-118588451	MERGE.33839	2:+:118585277-118588451	2:+:118585277-118588451	NONMMUG067404.1	-	-	-	lncRNA	0.82331	0.21901	0.69092	0.22478	0.15607	0.14185
NONMMUT131725.1	-1.29218378053009	0.0396435	0.730234	down	8:-:115604313-115606001	MERGE.58266	8:-:115604313-115606001	8:-:115604313-115606001	NONMMUG082907.1	-	-	-	lncRNA	0.4133	0.12222	0.31058	0.47732	0.70088	0.76663
NONMMUT039904.2	-5.18206153804483	0.0328118	0.730234	down	2:-:130873059-130906396	MERGE.34324	2:-:130706200-130906406	2:-:130873059-130906396	NONMMUG024695.2	-	-	-	lncRNA	0	0.57264	0	0.78364	0.36751	0.93699
NONMMUT118179.1	1.69025	0.0290165	0.724702	up	5:+:31589950-31590991	MERGE.44259	5:+:31589950-31594641	5:+:31589950-31590991	NONMMUG074175.1	-	-	-	lncRNA	0.91223	0.34409	0.65217	0.10147	0.21136	0.27014
NONMMUT077276.1	-1.5519493009112	0.00881729	0.535589	down	1:-:6204110-6205521	MERGE.45	1:-:6204110-6205521	1:-:6204110-6205521	NONMMUG047932.1	-	-	-	lncRNA	0.82045	0.50016	0.42217	2.30257	1.15032	1.96363
NONMMUT091724.1	1.47715	0.00955835	0.552938	up	13:-:72603687-72605595	NONMMUG057135.1	13:-:72603687-72605595	13:-:72603687-72605595	NONMMUG057135.1	-	-	-	lncRNA	0.87916	0.44393	0.54333	0.18693	0.20911	0.28016
MERGE.23644.20	7.11053	0.0152169	0.628746	up	16:-:45746244-45844343	MERGE.23644	16:-:45729725-45953598	-	-	-	-	-	-	1.84413	1.97619	2.04677	1.87404	0	0
NONMMUT043439.2	1.15231	0.0100989	0.563295	up	3:-:69085105-69085447	MERGE.37400	3:-:69085105-69085447	3:-:69085105-69085447	NONMMUG026825.2	-	-	-	lncRNA	239.585	298.011	297.845	174.78	141.02	86.3746
MERGE.47199.1	-5.79893274033718	4.02141e-05	0.0306886	down	5:-:144422852-144423064	MERGE.47199	5:-:144422852-144423064	-	-	-	-	-	-	0	0	0	1.24098	1.68022	2.37876
MERGE.33709.1	-1.58087882686216	0.00245107	0.310691	down	2:+:112590598-112594092	MERGE.33709	2:+:112590598-112594092	-	-	-	-	-	-	1.19413	0.59066	0.60719	2.05714	2.29218	3.04441
NONMMUT001673.2	-1.41690641189466	0.0093449	0.546342	down	1:-:80609104-80609684	MERGE.1485	1:-:80609104-80609684	1:-:80609104-80609684	NONMMUG001122.2	-	-	-	lncRNA	1.35486	1.62694	2.17512	3.88985	5.994	5.08711
NONMMUT115218.1	-1.36539277530156	0.00313195	0.351876	down	4:+:85829668-85833081	MERGE.41280	4:+:85829668-85833081	4:+:85829668-85833081	NONMMUG072250.1	-	-	-	lncRNA	0.62211	0.39463	0.55525	1.18073	1.48777	1.67375
NONMMUT076901.1	2.15076	0.00854732	0.530055	up	1:+:180821848-180823038	MERGE.3737	1:+:180821848-180823038	1:+:180821848-180823038	NONMMUG047710.1	-	-	-	lncRNA	0.99763	0.38315	0.61062	0.21084	0.12713	0.09454
MERGE.64392.1	6.11918	0.0247543	0.700067	up	Y:-:1131423-1132091	MERGE.64392	Y:-:1131423-1132091	-	-	-	-	-	-	8.79149	2.06256	6.91448	4.18816	0	0
NONMMUT027371.2	-3.85932111146781	0.0159142	0.635641	down	16:+:77436360-77680135	MERGE.23994	16:+:77236317-77691403	16:+:77436360-77680135	NONMMUG016963.2	-	-	-	lncRNA	0	0.31266	0	0.5388	0.7262	0.54002
MERGE.59538.1	-1.64341861164697	0.00866767	0.530958	down	9:-:36708482-36767574	MERGE.59538	9:-:36708482-36767679	-	-	-	-	-	-	1.56362	1.17795	1.09527	2.59426	3.68765	7.70575
MERGE.9274.2	8.35318	0.00662523	0.475691	up	11:-:71007442-71019246	MERGE.9274	11:-:71007164-71019841	-	-	-	-	-	-	4.72011	3.41075	8.72174	0	1.40092	0
MERGE.20795.2	-1.04583816014879	0.026053	0.707188	down	15:-:53064041-53346017	MERGE.20795	15:-:53064038-53346159	-	-	-	-	-	-	3.20624	1.58668	4.23407	5.16539	6.32414	6.48941
MERGE.29277.35	10.3152	0.000731285	0.177106	up	19:-:5796197-5802671	MERGE.29277	19:-:5795076-5802772	-	-	-	-	-	-	51.7972	20.7327	18.6541	0.11875	0	0.07191
MERGE.37431.1	-2.64975773592734	0.00151188	0.246229	down	3:-:73256787-73257460	MERGE.37431	3:-:73256787-73257460	-	-	-	-	-	-	0.63905	0.25792	0.24764	1.84324	2.12396	2.94434
MERGE.6656.1	-4.15237838166549	0.00124927	0.223845	down	10:-:104241966-104242167	MERGE.6656	10:-:104241966-104242167	-	-	-	-	-	-	0.22058	0.05379	0.11804	2.09369	3.13458	2.09025
NONMMUT133072.1	-1.70753039169023	0.0288621	0.724224	down	9:+:89404100-89405052	MERGE.61094	9:+:89404100-89405052	9:+:89404100-89405052	NONMMUG083787.1	-	-	-	lncRNA	0.49871	0.15961	0.20016	0.62407	0.67886	1.43254
MERGE.50637.1	-2.00229906942645	0.0226483	0.688608	down	6:+:131063268-131063636	MERGE.50637	6:+:131063268-131063636	-	-	-	-	-	-	1.771	0.35333	0.45233	1.71921	2.68583	4.04304
MERGE.55338.1	-2.99909057290654	0.00911958	0.542027	down	8:+:20887321-20888138	MERGE.55338	8:+:20887321-20888138	-	-	-	-	-	-	0.07263	0.77038	0.1749	1.84189	2.2044	2.25396
NONMMUT096077.1	-1.04370027259544	0.0281098	0.719341	down	15:+:76091717-76097701	MERGE.21285	15:+:76091717-76097701	15:+:76091717-76097701	NONMMUG014818.2	-	-	-	lncRNA	0.4939	0.3484	0.38938	0.80052	1.23426	0.70205
MERGE.9836.9	-1.02894993562453	0.0338655	0.730234	down	11:+:84908238-84911114	MERGE.9836	11:+:84880148-84911226	-	-	-	-	-	-	1.16262	0.88993	0.65513	1.4388	1.84103	2.75066
MERGE.8341.1	-2.70603422981443	0.00310007	0.349585	down	11:-:48939525-48939847	MERGE.8341	11:-:48939525-48939847	-	-	-	-	-	-	0.50581	0.20183	0.25837	2.20955	1.57678	2.44013
NONMMUT024432.2	-2.59875335838015	0.00196246	0.281773	down	15:+:84187722-84189126	MERGE.21685	15:+:84187722-84189126	15:+:84187722-84189126	NONMMUG015106.2	-	-	-	lncRNA	0.29599	0.27839	0.18668	1.25109	1.3324	2.59449
NONMMUT148169.1	2.03083	0.0179797	0.652262	up	4:+:115825348-115825921	MERGE.41883	4:+:115784812-115836185	4:+:115825348-115825921	NONMMUG093188.1	-	-	-	lncRNA	0.9315	0.43536	0.81004	0.1842	0.23981	0.09808
MERGE.1872.4	4.53753	0.0407176	0.730234	up	1:-:93792724-93801906	MERGE.1872	1:-:93792576-93802080	-	-	-	-	-	-	1.28068	1.31421	0.54256	0	1.38473	0
NONMMUT034913.2	-2.42718741074492	0.0498055	0.730234	down	19:-:45817364-45818704	MERGE.30508	19:-:45817364-45998512	19:-:45817364-45818704	NONMMUG021487.2	-	-	-	lncRNA	0.36549	0.31598	5.29873	5.18406	5.081	4.77541
MERGE.309.1	-4.78451657304826	0.00523658	0.431024	down	1:+:21205218-21205741	MERGE.309	1:+:21205218-21205741	-	-	-	-	-	-	0.53854	0	0.06826	2.6231	1.68121	1.61157
MERGE.23210.16	2.039	0.0434034	0.730234	up	16:-:31253276-31274975	MERGE.23210	16:-:31236584-31275283	-	-	-	-	-	-	1.29772	8.54799	1.88182	0.61817	1.00565	0.57492
MERGE.49764.6	-1.051963834169	0.0280179	0.718721	down	6:-:97287088-97617457	MERGE.49764	6:-:97286867-97617541	-	-	-	-	-	-	1.16438	1.37337	1.81786	2.18409	4.30702	3.35393
NONMMUT021040.2	-1.51531014330333	0.0178028	0.650528	down	14:-:56696275-56701000	MERGE.18711	14:-:56696275-56701269	14:-:56696275-56701000	NONMMUG013059.2	-	-	-	lncRNA	0.25313	0.49045	0.25261	0.8401	1.33147	0.86222
MERGE.16006.1	-7.17823959562953	7.28244e-06	0.0104737	down	13:-:68443074-68443608	MERGE.16006	13:-:68443074-68443608	-	-	-	-	-	-	0	0	0	1.3587	2.26413	1.92042
MERGE.61531.1	-5.38143042735992	4.38303e-05	0.0323906	down	9:-:106470125-106476395	MERGE.61531	9:-:106470125-106476949	-	-	-	-	-	-	0.14174	0.04814	0.23974	5.428	5.98167	4.24533
MERGE.62731.13	-1.15257178660199	0.0331397	0.730234	down	X:-:41803516-41858954	MERGE.62731	X:-:41794991-41920674	-	-	-	-	-	-	0.83228	0.59943	1.76663	2.29817	2.22656	2.39857
MERGE.29831.1	2.36994	0.0261769	0.707998	up	19:+:23179500-23180547	MERGE.29831	19:+:23179500-23180547	-	-	-	-	-	-	2.9903	0.64278	0.81908	0.10089	0.28896	0.37603
NONMMUT120343.1	2.68513	0.0275095	0.715549	up	5:-:44436763-44437939	MERGE.44622	5:-:44436763-44437939	5:-:44436763-44437939	NONMMUG075474.1	-	-	-	lncRNA	0.85808	0.19385	0.51659	0.13475	0.02339	0.07175
MERGE.34752.1	1.33806	0.00443036	0.404546	up	2:-:148416935-148418924	MERGE.34752	2:-:148416935-148418924	-	-	-	-	-	-	5.67969	3.91468	3.37894	2.31121	1.39724	1.76813
MERGE.51142.1	1.23304	0.0211797	0.676818	up	7:-:4782905-4783285	MERGE.51142	7:-:4782905-4783285	-	-	-	-	-	-	2.33894	1.82509	1.94009	0.76315	1.22836	0.73881
NONMMUT126483.1	-1.06057403777426	0.0189827	0.658241	down	7:-:16021372-16022223	MERGE.51344	7:-:16021372-16022223	7:-:16021372-16022223	NONMMUG079352.1	-	-	-	lncRNA	0.97621	0.5611	0.89556	1.65981	2.03565	1.56932
NONMMUT120921.1	3.10475	0.0493844	0.730234	up	5:-:104037948-104038881	MERGE.45626	5:-:104037948-104038881	5:-:104037948-104038881	NONMMUG075836.1	-	-	-	lncRNA	1.00181	0.41878	0.71482	0	0.2358	0.30138
NONMMUT069996.2	1.70404	0.0229358	0.69065	up	9:+:73092168-73093515	MERGE.60765	9:+:73092168-73093515	9:+:73092168-73093515	NONMMUG043327.2	-	-	-	lncRNA	0.9145	0.41106	0.64564	0.09804	0.34719	0.20882
MERGE.23375.1	-1.80823730703152	0.0114063	0.581247	down	16:+:35797668-35798548	MERGE.23375	16:+:35797668-35798548	-	-	-	-	-	-	1.07894	0.5673	0.32478	2.52027	1.43742	2.71582
NONMMUT092827.1	3.13148	0.0327981	0.730234	up	14:+:48273816-48274515	MERGE.18309	14:+:48273816-48274515	14:+:48273816-48274515	NONMMUG057856.1	-	-	-	lncRNA	0.57287	0.34147	0.78345	0	0.15731	0.16085
NONMMUT115215.1	-1.42936117158622	0.0264152	0.709465	down	4:+:85821752-85822382	MERGE.41277	4:+:85821752-85822382	4:+:85821752-85822382	NONMMUG072247.1	-	-	-	lncRNA	1.03566	0.30994	0.35899	1.36144	1.11253	1.58364
MERGE.59386.5	4.9066	0.0367388	0.730234	up	9:-:30911207-30922452	MERGE.59386	9:-:30899155-30922452	-	-	-	-	-	-	0.35662	1.31976	0.3452	0.39201	0	0
NONMMUT059062.2	-1.00757670576508	0.0117543	0.587138	down	6:-:128964709-128970182	MERGE.50608	6:-:128964709-128970182	6:-:128964709-128970182	NONMMUG036701.2	-	-	-	lncRNA	0.50738	0.41483	0.35283	1.08406	0.77701	0.89218
NONMMUT141290.1	-7.02490286045985	4.97645e-06	0.00877765	down	12:+:18775265-18777116	NONMMUG089127.1	12:+:18775265-18777116	12:+:18775265-18777116	NONMMUG089127.1	-	-	-	lncRNA	0	0	0	1.01124	0.76065	1.01706
NONMMUT026126.2	5.33866	0.0184665	0.656239	up	16:-:29907519-29946517	MERGE.23173	16:-:29907519-29946754	16:-:29907519-29946517	NONMMUG016174.3	-	-	-	lncRNA	1.06266	0.87454	0.69307	0	0	0.86539
NONMMUT024297.2	-1.01183299660919	0.0463324	0.730234	down	15:-:81113250-81114529	MERGE.21562	15:-:81113250-81114529	15:-:81113250-81114529	NONMMUG015015.2	-	-	-	lncRNA	2.4251	1.45998	0.94073	2.94271	2.60242	4.44221
MERGE.12703.1	-2.66780485959186	0.00083624	0.192182	down	12:-:72297221-72297706	MERGE.12703	12:-:72297221-72297706	-	-	-	-	-	-	0.39728	0.3577	0.3925	2.50187	2.26582	3.18555
MERGE.6969.1	-2.95160889753706	0.01395	0.61557	down	10:-:119038730-119039161	MERGE.6969	10:-:119038730-119039161	-	-	-	-	-	-	0.03438	0.35211	0.33117	1.22374	1.72061	2.21541
MERGE.26107.1	-1.06288725005976	0.0312135	0.730234	down	17:-:50093369-50093940	MERGE.26107	17:-:50093369-50093940	-	-	-	-	-	-	1.03862	0.60783	0.8754	2.31056	1.90109	1.3287
MERGE.21165.2	-4.66237627579262	0.0479241	0.730234	down	15:-:74750521-74753014	MERGE.21165	15:-:74747852-74753046	-	-	-	-	-	-	0	0.02337	0	0.0379	0.10854	2.04809
NONMMUT152143.1	-1.04441061999643	0.020461	0.670781	down	8:+:41385587-41387957	MERGE.56028	8:+:41385587-41387957	8:+:41385587-41387957	NONMMUG095499.1	-	-	-	lncRNA	0.96468	0.46741	0.48775	1.67226	1.24819	1.11597
MERGE.23558.29	-2.31326237361466	0.0470093	0.730234	down	16:+:42907652-43309378	MERGE.23558	16:+:42875814-43727234	-	-	-	-	-	-	1.44768	0.65007	0.56597	1.06919	9.0187	8.36356
NONMMUT010533.2	1.4953	0.0467204	0.730234	up	11:+:70764447-70765721	MERGE.9243	11:+:70764209-70772928	11:+:70764447-70765721	NONMMUG006623.2	-	-	-	lncRNA	1.0251	0.35791	0.31792	0.20732	0.17274	0.13246
NONMMUT096531.1	-1.61002321340614	0.0290111	0.724702	down	15:+:101082225-101086060	MERGE.22267	15:+:101053830-101093378	15:+:101082225-101086060	NONMMUG015516.3	-	-	-	lncRNA	0.10454	0.18127	0.43822	0.84411	0.6459	0.58337
MERGE.46920.4	-5.24925995246264	0.019885	0.665464	down	5:-:138259660-138263994	MERGE.46920	5:-:138259656-138264033	-	-	-	-	-	-	0	1.23998	0.07188	4.81528	3.60424	2.16995
MERGE.64393.1	4.972	0.034531	0.730234	up	Y:-:1143958-1145013	MERGE.64393	Y:-:1143958-1145013	-	-	-	-	-	-	5.69619	2.67509	4.19984	6.05752	0.05214	0
NONMMUT048004.2	-1.07537159105949	0.02772	0.716646	down	4:-:87943325-87945757	MERGE.41354	4:-:87943325-87945757	4:-:87943325-87945757	NONMMUG029779.2	-	-	-	lncRNA	2.85081	0.93333	1.34755	2.92792	3.61519	3.97992
NONMMUT083055.1	-1.6323638654559	0.00761628	0.505141	down	10:-:130525467-130542402	MERGE.7366	10:-:130368077-130542452	10:-:130525467-130542402	NONMMUG005076.3	-	-	-	lncRNA	0.29477	0.13246	0.11155	0.45716	0.49174	0.6704
NONMMUT122571.1	-5.20816947927666	0.019907	0.665464	down	6:+:86496753-86500330	MERGE.49353	6:+:86494649-86501285	6:+:86496753-86500330	NONMMUG035879.2	-	-	-	lncRNA	0.74718	0	0.18993	2.0242	1.79659	2.00612
MERGE.63681.1	1.5375	0.0367806	0.730234	up	X:-:121328564-121328846	MERGE.63681	X:-:121328564-121328846	-	-	-	-	-	-	1.9943	1.53569	1.09532	0.56041	0.77823	0.2984
NONMMUT072015.2	-1.78123174132165	0.0180512	0.653054	down	X:-:21612196-21616399	NONMMUG044620.2	X:-:21612196-21616399	X:-:21612196-21616399	NONMMUG044620.2	-	-	-	lncRNA	0.19415	0.2384	0.07792	0.43191	0.59763	0.70963
MERGE.29857.1	3.20858	0.000307749	0.107176	up	19:-:24035233-24037148	MERGE.29857	19:-:24035233-24037148	-	-	-	-	-	-	2.72085	1.40633	1.51827	0.30351	0.12932	0.20568
NONMMUT006046.2	-1.38560447251635	0.00531167	0.433671	down	10:-:68213307-68216283	MERGE.5704	10:-:68213307-68216283	10:-:68213307-68216283	NONMMUG003890.2	-	-	-	lncRNA	1.36844	0.51703	0.66391	2.14995	2.14162	2.26576
MERGE.64378.4	6.64148	0.0125537	0.599365	up	Y:+:897793-899236	MERGE.64378	Y:+:897788-956786	-	-	-	-	-	-	4.43306	2.86673	4.39237	2.91054	0	0
NONMMUT075147.1	-2.81527672033654	0.0224912	0.687783	down	1:+:23325871-23326564	MERGE.370	1:+:23325871-23326564	1:+:23325871-23326564	NONMMUG046594.1	-	-	-	lncRNA	0.44942	0.03131	0.39511	1.94247	0.7537	1.68324
MERGE.56671.3	1.72699	0.000719126	0.175543	up	8:+:72319050-72325773	MERGE.56671	8:+:72319033-72325773	-	-	-	-	-	-	1.91082	1.40631	1.61053	0.66984	0.54201	0.4033
NONMMUT010815.2	-1.30655714443106	0.0293227	0.726531	down	11:+:77276760-77280644	MERGE.9522	11:+:77216287-77460220	11:+:77276760-77280644	NONMMUG006819.2	-	-	-	lncRNA	0.38994	0.23492	0.21788	1.22469	0.67319	0.43473
MERGE.13343.1	-1.578090898406	0.0417766	0.730234	down	12:-:87903282-87903496	MERGE.13343	12:-:87903282-87903496	-	-	-	-	-	-	0.55264	0.70749	1.05358	1.53679	2.817	3.40403
NONMMUT031122.2	-2.82655875104412	0.0149823	0.627229	down	17:-:90620048-90622365	MERGE.27041	17:-:90033631-91093071	17:-:90620048-90622365	NONMMUG019171.2	-	-	-	lncRNA	0.14737	0.04219	0.55033	0.72411	1.41331	1.48758
MERGE.45688.1	1.35595	0.0207318	0.673178	up	5:-:105360886-105361972	MERGE.45688	5:-:105360886-105361972	-	-	-	-	-	-	3.36124	1.41935	2.21552	0.82678	0.63316	1.47606
MERGE.18656.7	-4.68643831489229	0.0161703	0.637725	down	14:-:55588054-55590895	MERGE.18656	14:-:55587169-55591113	-	-	-	-	-	-	0	0.29957	0.01264	0.81289	0.37952	1.02983
NONMMUT057398.2	-2.62740500294067	0.03101	0.730234	down	6:+:71875274-71877401	MERGE.49074	6:+:71831331-71877401	6:+:71875274-71877401	NONMMUG035644.2	-	-	-	lncRNA	0.07454	0.02726	0.61331	0.84572	0.63902	0.93593
MERGE.57844.4	2.39263	0.00202975	0.28598	up	8:-:111710477-111736919	MERGE.57844	8:-:111686519-111743809	-	-	-	-	-	-	5.23276	3.84677	7.12728	2.06621	0.68395	0.80167
MERGE.35131.7	-6.3194187483371	0.0343072	0.730234	down	2:-:156071850-156111684	MERGE.35131	2:-:156071842-156144186	-	-	-	-	-	-	0	3.52591	0	1.84287	3.70843	2.15835
MERGE.11119.7	9.78817	0.000130347	0.0605427	up	11:-:116289109-116307233	MERGE.11119	11:-:116288001-116307233	-	-	-	-	-	-	1.80514	6.12331	1.28916	0	0	0
NONMMUT066466.2	-2.23951838736593	0.00835545	0.526566	down	8:-:85661868-85663617	MERGE.57170	8:-:85636588-85700940	8:-:85661868-85663617	NONMMUG041145.2	-	-	-	lncRNA	0.10184	0.08071	0.12263	0.65704	0.29889	0.66753
NONMMUT150556.1	-2.01635402967722	0.0344689	0.730234	down	6:-:88189315-88190558	MERGE.49475	6:-:88164723-88197594	6:-:88189315-88190558	NONMMUG035937.3	-	-	-	lncRNA	0.04776	0.32316	0.26834	0.90305	0.86307	0.58832
MERGE.21896.4	7.07133	0.00961011	0.553847	up	15:-:89130585-89137444	MERGE.21896	15:-:89130584-89140703	-	-	-	-	-	-	5.39249	5.50334	2.8312	0	0	2.14448
NONMMUT139362.1	-3.72028394133032	0.0260732	0.707188	down	10:+:18318721-18319114	MERGE.4623	10:+:18318721-18533892	10:+:18318721-18319114	NONMMUG088046.1	-	-	-	lncRNA	0	0.05515	0	0.40253	1.32758	0.07144
MERGE.59135.1	-6.15162823252048	7.21315e-05	0.0429499	down	8:-:123425814-123430894	MERGE.59135	8:-:123425814-123434150	-	-	-	-	-	-	0.01754	0.06415	0.0657	2.83264	5.04703	2.87525
NONMMUT077903.1	1.35464	0.0423797	0.730234	up	1:-:62906179-62907080	NONMMUG048350.1	1:-:62906179-62907080	1:-:62906179-62907080	NONMMUG048350.1	-	-	-	lncRNA	1.20201	0.45773	0.84592	0.32235	0.19839	0.4369
MERGE.52421.1	-1.13329928325285	0.011199	0.579911	down	7:-:46504058-46505228	MERGE.52421	7:-:46504058-46505228	-	-	-	-	-	-	1.00199	0.77939	0.72286	1.67039	1.88077	2.34372
MERGE.56863.1	-1.466860995635	0.0169971	0.644597	down	8:+:77100078-77101297	MERGE.56863	8:+:77100078-77101297	-	-	-	-	-	-	0.9374	0.72136	0.47884	1.33247	2.16628	2.93023
MERGE.39281.1	-1.35143358717802	0.0384052	0.730234	down	3:-:136196460-136197406	MERGE.39281	3:-:136196460-136197406	-	-	-	-	-	-	0.90964	0.25241	0.49099	1.35374	0.85758	1.75372
MERGE.15190.20	-3.52649375706401	0.015497	0.632225	down	13:-:45734649-45964882	MERGE.15190	13:-:45549755-45965008	-	-	-	-	-	-	0.61055	0.0971	0.02131	0.73228	1.57454	1.39611
NONMMUT075621.1	3.60088	0.00323079	0.352286	up	1:+:66796837-66797745	MERGE.1245	1:+:66796837-66797745	1:+:66796837-66797745	NONMMUG046914.1	-	-	-	lncRNA	0.65205	0.636	0.4071	0	0.06715	0
MERGE.49758.1	-1.35400518149432	0.00854384	0.530055	down	6:+:97827699-97830375	MERGE.49758	6:+:97827699-97830375	-	-	-	-	-	-	1.78094	0.74679	0.71257	2.9474	2.9206	2.26598
MERGE.11916.6	8.01652	0.00732512	0.497209	up	12:-:26307034-26415010	MERGE.11916	12:-:26300964-26415254	-	-	-	-	-	-	9.38193	13.0226	13.9224	0.03792	0	3.1477
MERGE.7706.1	-1.91271953278468	0.00912406	0.542027	down	11:-:18466721-18467340	MERGE.7706	11:-:18466721-18467340	-	-	-	-	-	-	0.38328	0.28039	0.42304	1.10847	1.24328	2.15655
NONMMUT098399.1	-4.83601734184672	0.00274983	0.329147	down	16:+:40108315-40109026	NONMMUG061495.1	16:+:40108315-40109026	16:+:40108315-40109026	NONMMUG061495.1	-	-	-	lncRNA	0.06258	0	0	0.33412	0.52198	1.00813
MERGE.35629.1	1.09991	0.0053674	0.435052	up	2:+:172470695-172478679	MERGE.35629	2:+:172470695-172478679	-	-	-	-	-	-	0.96721	0.57965	0.78685	0.40386	0.39993	0.34723
MERGE.38485.13	-1.14865713325859	0.0477586	0.730234	down	3:-:104822917-104838183	MERGE.38485	3:-:104790397-104865244	-	-	-	-	-	-	1.80797	0.9127	1.13344	3.95007	1.5152	3.98348
NONMMUT024007.2	-1.14001063862787	0.0341967	0.730234	down	15:-:76326017-76327533	MERGE.21299	15:-:76296601-76328015	15:-:76326017-76327533	NONMMUG014829.2	-	-	-	lncRNA	0.46016	0.15757	0.22791	0.60985	0.5535	0.55666
NONMMUT046097.2	-2.81904484753079	0.0455298	0.730234	down	4:+:8597047-8599712	MERGE.39868	4:+:8579907-8601657	4:+:8597047-8599712	NONMMUG028461.2	-	-	-	lncRNA	5.02504	0.12226	0.23701	3.1876	3.90848	4.43981
NONMMUT091588.1	-1.96326164614104	0.00473627	0.414572	down	13:-:62506201-62507802	MERGE.15621	13:-:62506201-62507802	13:-:62506201-62507802	NONMMUG057047.1	-	-	-	lncRNA	0.24105	0.12208	0.0893	0.53625	0.60146	0.55349
NONMMUT056010.2	-1.02616507226776	0.0308163	0.730234	down	6:+:28594356-28596066	MERGE.47788	6:+:28594356-28596066	6:+:28594356-28596066	NONMMUG034792.2	-	-	-	lncRNA	1.5538	0.64771	0.64802	2.33276	1.64921	1.71919
MERGE.1237.24	7.13234	0.0272572	0.714183	up	1:-:66830939-66863091	MERGE.1237	1:-:66718935-66863277	-	-	-	-	-	-	1.53897	9.59622	2.78445	1.26077	0	0
MERGE.1237.21	1.62729	0.0133162	0.608133	up	1:-:66821226-66863277	MERGE.1237	1:-:66718935-66863277	-	-	-	-	-	-	3.33794	3.02301	2.30349	1.44581	0.45174	1.38457
MERGE.2375.1	-1.33127701811893	0.00541777	0.436238	down	1:-:127544573-127548446	MERGE.2375	1:-:127544573-127548446	-	-	-	-	-	-	1.2805	0.80211	0.62165	2.24481	1.97555	2.84466
NONMMUT070206.2	-6.00062348789331	0.0174538	0.648376	down	9:+:81631930-81645156	MERGE.60935	9:+:81629852-81645157	9:+:81631930-81645156	NONMMUG043463.2	-	-	-	lncRNA	1.40634	0	0	0.89279	1.57358	2.34031
NONMMUT002252.2	-1.17105958603922	0.00896479	0.539987	down	1:+:107590013-107592368	MERGE.2056	1:+:107590006-107610484	1:+:107590013-107592368	NONMMUG001515.2	-	-	-	lncRNA	1.27972	0.5534	0.71857	2.15973	1.88128	1.75033
NONMMUT074379.2	-1.00098334547244	0.0254619	0.704253	down	X:+:152167788-152169974	MERGE.64104	X:+:152167788-152169974	X:+:152167788-152169974	NONMMUG046133.2	-	-	-	lncRNA	0.65195	0.28814	0.33798	0.94273	0.78045	0.81087
MERGE.25803.5	2.58172	0.00649963	0.473384	up	17:-:36029979-36032730	MERGE.25803	17:-:36029773-36129425	-	-	-	-	-	-	1.95401	3.61292	2.75569	0.66202	0.19106	0.86637
MERGE.31576.5	7.25203	0.0171588	0.645627	up	2:-:25244872-25255368	MERGE.31576	2:-:25244819-25256022	-	-	-	-	-	-	1.63938	0.67636	1.4569	0	0	1.28993
NONMMUT149555.1	1.87167	0.0251785	0.702508	up	5:-:76587184-76588334	MERGE.45173	5:-:76587184-76588334	5:-:76587184-76588334	NONMMUG094034.1	-	-	-	lncRNA	0.96779	0.34927	0.50755	0.22965	0.07175	0.19565
MERGE.54094.1	-9.37525512247181	1.87165e-06	0.00630017	down	7:-:119715093-119720764	MERGE.54094	7:-:119715093-119720798	-	-	-	-	-	-	0	0	0	2.27964	2.15684	1.31033
NONMMUT012492.2	-1.21650059028033	0.0101946	0.565627	down	11:-:108287591-108290190	MERGE.10854	11:-:108287591-108290190	11:-:108287591-108290190	NONMMUG007925.2	-	-	-	lncRNA	6.64354	2.6076	3.66835	8.2755	9.73601	12.0173
NONMMUT133293.1	1.04314	0.0155265	0.632225	up	9:+:94552811-94554040	MERGE.61151	9:+:94552811-94564540	9:+:94552811-94554040	NONMMUG083979.1	-	-	-	lncRNA	1.1592	0.8745	0.98867	0.51576	0.51478	0.50347
NONMMUT021253.2	-3.81690679395448	0.0226326	0.688608	down	14:+:63664448-63666180	MERGE.18948	14:+:63606503-63820809	14:+:63664448-63666180	NONMMUG090145.1	-	-	-	lncRNA	0.01714	0.05016	0.04816	0.80076	0.20651	1.25069
NONMMUT030150.2	1.3192	0.00786674	0.511946	up	17:+:57066155-57068110	MERGE.26300	17:+:57066155-57068110	17:+:57066155-57068110	NONMMUG018631.2	-	-	-	lncRNA	0.80488	0.51659	0.68266	0.27027	0.33779	0.23026
MERGE.43467.4	-2.33367811711051	0.00901017	0.540788	down	4:-:155154194-155222592	MERGE.43467	4:-:155154075-155222592	-	-	-	-	-	-	1.53024	3.16278	5.10981	19.3891	23.6219	7.86084
NONMMUT153685.1	3.03296	0.0184009	0.656166	up	9:-:44477667-44478886	MERGE.59796	9:-:44476633-44479759	9:-:44477667-44478886	NONMMUG096229.1	-	-	-	lncRNA	0.8887	0.66793	0.94791	0.02167	0.62055	0.05768
NONMMUT105844.1	-2.07051259321109	0.0122038	0.592498	down	19:-:8477762-8478436	MERGE.29420	19:-:8477762-8478436	19:-:8477762-8478436	NONMMUG066154.1	-	-	-	lncRNA	0.44007	0.30583	0.31792	0.95941	1.48865	2.66891
NONMMUT101584.1	-1.59556435537108	0.011016	0.578309	down	17:+:88077631-88078804	MERGE.27009	17:+:88077631-88078804	17:+:88077631-88078804	NONMMUG063568.1	-	-	-	lncRNA	0.31628	0.12957	0.21326	0.77677	0.55106	0.6234
MERGE.50188.5	5.49394	0.0385652	0.730234	up	6:-:119353150-119388329	MERGE.50188	6:-:119353150-119417704	-	-	-	-	-	-	3.09896	4.00071	3.21759	2.63228	0.14429	0
MERGE.317.1	1.66434	0.000549537	0.149394	up	1:-:21276667-21298247	MERGE.317	1:-:21276667-21298312	-	-	-	-	-	-	4.52978	3.4532	4.941	1.67465	1.35012	1.28568
MERGE.27898.1	-10.6485889767952	3.8845e-07	0.0035216	down	18:-:38267092-38284399	MERGE.27898	18:-:38267092-38284402	-	-	-	-	-	-	0	0	0	3.1084	2.73803	2.21952
NONMMUT128858.1	-2.17118269906564	0.00746009	0.500643	down	8:+:71371298-71373689	MERGE.56688	8:+:71371298-71379361	8:+:71371298-71373689	NONMMUG040874.2	-	-	-	lncRNA	0.23559	0.32315	0.30731	2.49827	1.30098	0.8279
NONMMUT027252.2	-1.15742185626492	0.0087119	0.532284	down	16:-:74295657-74297984	MERGE.23901	16:-:74295657-74297984	16:-:74295657-74297984	NONMMUG016914.2	-	-	-	lncRNA	0.91232	0.44337	0.56333	1.27736	1.52549	1.57792
NONMMUT131969.1	5.73247	0.0060035	0.458716	up	9:+:7224039-7226901	MERGE.58496	9:+:7224039-7227371	9:+:7224039-7226901	NONMMUG083058.1	-	-	-	lncRNA	0.7159	0.30739	0.5122	0	0.15866	0
MERGE.54923.3	-3.84677894154213	0.0130575	0.604811	down	7:-:144476766-144553624	MERGE.54923	7:-:144476758-144553729	-	-	-	-	-	-	0.08705	0.09003	0.23372	2.11281	6.1508	0.52338
NONMMUT050132.2	1.96806	0.043288	0.730234	up	4:+:136574083-136574383	MERGE.42741	4:+:136574083-136574383	4:+:136574083-136574383	NONMMUG031039.2	-	-	-	lncRNA	0.98686	0.46925	1.06943	0.08782	0.18292	0.37407
NONMMUT027952.2	4.66477	0.0352953	0.730234	up	17:-:3111792-3114795	MERGE.24420	17:-:3099779-3114951	17:-:3111792-3114795	NONMMUG017317.3	-	-	-	lncRNA	3.22127	3.8765	4.22407	3.73079	0	0.16311
NONMMUT058167.2	1.32828	0.0142721	0.620127	up	6:-:98928862-98930077	MERGE.49918	6:-:98925338-99666797	6:-:98928862-98930077	NONMMUG036122.2	-	-	-	lncRNA	2.29624	2.86815	4.17667	1.58684	1.1999	1.13428
MERGE.64212.1	-1.35741468727792	0.00898859	0.540509	down	X:+:159685159-159690630	MERGE.64212	X:+:159685159-159690630	-	-	-	-	-	-	1.18341	0.42292	0.58391	1.63756	1.61747	2.30971
NONMMUT058621.2	-1.00056392050431	0.0477915	0.730234	down	6:-:119784805-119788050	MERGE.50197	6:-:119570796-119848167	6:-:119784805-119788050	NONMMUG036438.2	-	-	-	lncRNA	0.65888	0.6025	0.57297	0.86725	1.28065	2.09424
NONMMUT061757.2	6.55695	0.00811582	0.52144	up	7:-:61751204-61911506	MERGE.52693	7:-:61704519-62091267	7:-:61751204-61911506	NONMMUG038184.3	-	-	-	lncRNA	2.03559	1.1582	1.06772	0	0.62885	0
MERGE.35397.2	-1.33516512861495	0.00682669	0.480922	down	2:-:164884583-164911755	MERGE.35397	2:-:164884522-164911765	-	-	-	-	-	-	1.06994	0.67232	1.5085	3.26367	2.71102	2.35276
MERGE.37947.5	5.56521	0.04965	0.730234	up	3:-:90450885-90465866	MERGE.37947	3:-:90450591-90466574	-	-	-	-	-	-	2.09706	16.9518	6.62475	1.5952	0.84637	0
MERGE.37947.1	-7.50082217638637	0.00411026	0.39092	down	3:-:90450591-90466574	MERGE.37947	3:-:90450591-90466574	-	-	-	-	-	-	0	0.8077	0.03589	11.3126	10.4049	5.97133
NONMMUT129774.1	-2.07411229037372	0.013369	0.608674	down	8:+:126188643-126189829	NONMMUG081536.1	8:+:126188643-126189829	8:+:126188643-126189829	NONMMUG081536.1	-	-	-	lncRNA	0.21271	0.16476	0.06026	0.62352	0.6378	0.42685
NONMMUT073473.2	-2.38228798949738	0.0287731	0.724224	down	X:+:103489517-103489917	MERGE.63465	X:+:103489517-103489917	X:+:103489517-103489917	NONMMUG045573.2	-	-	-	lncRNA	0.40742	0.27095	0.05946	1.21947	0.99547	0.70196
MERGE.3165.7	2.41044	0.00301223	0.344764	up	1:-:161838777-161876682	MERGE.3165	1:-:161816114-161876682	-	-	-	-	-	-	2.11029	4.88954	3.42657	0.49267	0.75852	0.77557
MERGE.3165.5	-2.42757205125117	0.00698002	0.486877	down	1:-:161832568-161857452	MERGE.3165	1:-:161816114-161876682	-	-	-	-	-	-	1.30441	0.72852	0.81195	7.51003	2.16445	8.86724
MERGE.24364.3	-10.467836559697	2.30637e-06	0.00653659	down	17:-:3076581-3082300	MERGE.24364	17:-:3062436-3084579	-	-	-	-	-	-	0	0	0	3.33786	6.95947	4.41749
MERGE.24364.6	1.45136	0.0167803	0.6429	up	17:-:3076648-3084183	MERGE.24364	17:-:3062436-3084579	-	-	-	-	-	-	1.11248	1.37398	0.82342	0.35998	0.46865	0.42442
NONMMUT074533.2	-6.22939871437025	0.0077124	0.507734	down	X:+:159698006-159702298	MERGE.64214	X:+:159698006-159702845	X:+:159698006-159702298	NONMMUG046227.2	-	-	-	lncRNA	0.36326	0	0	0.57878	0.7054	0.62618
MERGE.23601.1	3.12422	0.00742489	0.500173	up	16:+:43650688-43671977	MERGE.23601	16:+:43650688-43671977	-	-	-	-	-	-	2.04611	0.25568	1.15077	0.08567	0.09569	0.1375
NONMMUT085003.1	-6.79741871682328	0.00893498	0.539289	down	11:-:29148565-29173559	MERGE.7995	11:-:29148565-29173672	11:-:29148565-29173559	NONMMUG005600.2	-	-	-	lncRNA	1.68042	0	0	1.97843	2.36603	2.22323
NONMMUT027935.2	-4.26881438029905	0.0116114	0.584375	down	16:-:98081119-98082438	MERGE.24401	16:-:98063787-98082501	16:-:98081119-98082438	NONMMUG017311.2	-	-	-	lncRNA	0	0.21401	0.12645	1.32164	0.94894	1.58869
MERGE.61018.1	-2.37924181855503	0.000318619	0.10859	down	9:+:88566676-88567058	MERGE.61018	9:+:88566676-88567058	-	-	-	-	-	-	1.66749	1.19146	1.33852	8.83394	6.2535	8.26822
MERGE.26987.1	-1.37851061057282	0.0106641	0.572356	down	17:+:87331347-87332059	MERGE.26987	17:+:87331347-87332059	-	-	-	-	-	-	2.87464	1.09717	2.87603	5.63504	5.94612	5.72449
MERGE.34428.1	-1.3531814075873	0.00583995	0.454192	down	2:+:134860421-134871102	MERGE.34428	2:+:134860421-134871102	-	-	-	-	-	-	1.89373	1.47688	1.09266	2.72073	4.07715	5.30061
MERGE.26761.1	-2.2710178605093	0.0495171	0.730234	down	17:-:79333513-79354908	MERGE.26761	17:-:79333513-79356366	-	-	-	-	-	-	0.54637	0.79938	0.64781	0.87425	7.3261	6.54554
MERGE.62074.1	1.31702	0.0115718	0.58377	up	9:+:121983254-121984328	MERGE.62074	9:+:121983254-121984328	-	-	-	-	-	-	1.87899	1.54637	1.75228	0.78684	0.49938	1.00812
MERGE.1863.2	8.17965	0.0453933	0.730234	up	1:-:93621902-93635629	MERGE.1863	1:-:93619751-93658659	-	-	-	-	-	-	1.12841	13.598	13.3726	0.80737	0	0
MERGE.37955.14	-1.75540831677515	0.0372289	0.730234	down	3:-:90502276-90509447	MERGE.37955	3:-:90492364-90509498	-	-	-	-	-	-	0.5717	3.24556	1.15684	4.28712	5.00039	4.9153
NONMMUT115251.1	-2.16981339980302	0.0288752	0.724224	down	4:+:85915008-85915772	MERGE.41315	4:+:85915008-85915772	4:+:85915008-85915772	NONMMUG072281.1	-	-	-	lncRNA	0.27181	0.02841	0.14026	0.70833	0.37786	0.45995
NONMMUT140822.1	-1.24887304982302	0.0278887	0.718037	down	11:-:30243129-30243810	MERGE.8042	11:-:30243129-30243810	11:-:30243129-30243810	NONMMUG088849.1	-	-	-	lncRNA	0.84932	0.36641	0.40207	1.60845	1.02934	1.11439
MERGE.21356.3	-5.44250166655871	0.03694	0.730234	down	15:-:76719411-76723840	MERGE.21356	15:-:76715276-76723845	-	-	-	-	-	-	0	0.30425	0	1.80111	0.23984	1.14732
NONMMUT077265.1	-2.53981268817015	0.0243439	0.698557	down	1:-:6191675-6192489	MERGE.16	1:-:6191675-6192489	1:-:6191675-6192489	NONMMUG047927.1	-	-	-	lncRNA	0.45559	0.51992	0.05851	1.52435	1.01337	2.21045
NONMMUT048323.2	-1.07761232833878	0.018633	0.65719	down	4:+:100787115-100789387	MERGE.41559	4:+:100787115-100789387	4:+:100787115-100789387	NONMMUG029967.2	-	-	-	lncRNA	2.01907	0.92733	0.84446	2.6049	2.37388	2.98453
MERGE.43034.1	1.42104	0.0176381	0.650254	up	4:-:148431637-148431991	MERGE.43034	4:-:148431637-148431991	-	-	-	-	-	-	3.05413	1.83634	2.51876	0.59567	1.24078	1.07044
MERGE.53007.2	-3.59380474010858	0.00895558	0.539606	down	7:-:73426304-73558395	MERGE.53007	7:-:73423634-73561696	-	-	-	-	-	-	0.25912	0.02759	0.02484	1.58827	0.34858	0.56257
NONMMUT050994.2	-5.20355527673133	0.0257486	0.706172	down	4:+:155769969-155776161	MERGE.43499	4:+:155761178-155776220	4:+:155769969-155776161	NONMMUG031600.2	-	-	-	lncRNA	0	0	0.61611	0.61647	0.74367	0.392
NONMMUT100540.1	-1.88084777532569	0.0044805	0.407961	down	17:+:3288579-3290134	MERGE.24443	17:+:3288579-3290134	17:+:3288579-3290134	NONMMUG062895.1	-	-	-	lncRNA	0.4009	0.23043	0.13792	0.9683	0.90233	0.8412
MERGE.62699.1	-5.27344727633261	0.00106625	0.212069	down	X:-:38180043-38180596	MERGE.62699	X:-:38180043-38180596	-	-	-	-	-	-	0	0.13728	0.04304	1.57452	1.49078	1.72754
NONMMUT065406.2	1.65194	0.0216266	0.680474	up	8:-:41377438-41380752	MERGE.56026	8:-:41377438-41380752	8:-:41377438-41380752	NONMMUG040445.2	-	-	-	lncRNA	0.8647	0.27859	0.57543	0.09967	0.24083	0.21228
NONMMUT041842.2	-1.34135571587483	0.0446838	0.730234	down	2:-:180587665-180589714	MERGE.35924	2:-:180587665-180589714	2:-:180587665-180589714	NONMMUG025897.2	-	-	-	lncRNA	0.46368	0.2597	0.26171	1.56663	0.47673	0.7964
MERGE.41676.1	-1.01354625292849	0.00770903	0.507691	down	4:-:105967119-105975116	MERGE.41676	4:-:105967119-105975116	-	-	-	-	-	-	1.32033	0.71727	0.94059	1.78136	2.11688	2.3598
MERGE.6518.1	-1.05343756805906	0.0228905	0.689839	down	10:+:94350746-94352191	MERGE.6518	10:+:94350746-94352191	-	-	-	-	-	-	1.68449	0.7063	0.93992	2.55005	1.78963	2.65719
MERGE.42575.1	-2.16725589219531	0.0436078	0.730234	down	4:-:133656130-133656651	MERGE.42575	4:-:133656130-133656651	-	-	-	-	-	-	0.45524	0.35384	0.13704	2.50656	1.52943	0.53925
NONMMUT030679.2	-1.26496161327968	0.0155619	0.632225	down	17:+:78311006-78312051	MERGE.26714	17:+:78311006-78312051	17:+:78311006-78312051	NONMMUG018912.2	-	-	-	lncRNA	3.45039	1.19453	1.52731	5.48367	3.72415	5.23415
NONMMUT018561.2	-1.69360084352756	0.00303058	0.345106	down	13:+:88861107-88864004	MERGE.16319	13:+:88861107-88864004	13:+:88861107-88864004	NONMMUG011532.2	-	-	-	lncRNA	0.20029	0.2442	0.34216	0.85916	0.93289	0.92466
MERGE.62646.1	2.17539	0.0139727	0.61557	up	X:+:32506812-32507026	MERGE.62646	X:+:32506812-32507026	-	-	-	-	-	-	2.48689	2.72888	3.49346	0.49177	0.38414	1.3747
NONMMUT134330.1	1.78577	0.0308531	0.730234	up	9:-:51935308-51936935	NONMMUG084665.1	9:-:51935308-51936935	9:-:51935308-51936935	NONMMUG084665.1	-	-	-	lncRNA	0.75721	0.26695	0.51262	0.30849	0.08455	0.0951
MERGE.47048.1	-1.51029521579195	0.00621353	0.461002	down	5:-:140958471-140960564	MERGE.47048	5:-:140958471-140960564	-	-	-	-	-	-	1.58169	0.52924	0.72876	2.80233	2.1561	2.84982
NONMMUT089907.1	1.27478	0.00621073	0.461002	up	13:+:55186264-55187796	MERGE.15459	13:+:55184771-55188831	13:+:55186264-55187796	NONMMUG011058.2	-	-	-	lncRNA	46.4655	44.7216	37.0963	11.656	24.01	21.6578
NONMMUT128943.1	7.74973	2.32198e-06	0.00653659	up	8:+:80880021-80881805	MERGE.56978	8:+:80879940-80881805	8:+:80880021-80881805	NONMMUG041025.2	-	-	-	lncRNA	1.33934	1.06725	0.90232	0	0	0
MERGE.18040.1	-3.24191951306012	0.0065568	0.475053	down	14:+:35401067-35401343	MERGE.18040	14:+:35401067-35401343	-	-	-	-	-	-	0.16086	0.1569	0.38736	1.43138	2.78279	3.6075
NONMMUT037802.2	3.98111	0.0220655	0.684501	up	2:-:71269862-71273943	MERGE.32821	2:-:71269862-71367749	2:-:71269862-71273943	NONMMUG023347.2	-	-	-	lncRNA	1.40809	0.70801	1.20039	0.01295	1.08581	0.02069
MERGE.30583.10	7.3329	0.0195287	0.662292	up	19:-:46918404-46961993	MERGE.30583	19:-:46883379-47015153	-	-	-	-	-	-	9.22231	4.30529	5.33339	5.81824	0.00639	0
NONMMUT033401.2	1.15942	0.0112681	0.579911	up	19:+:3083615-3087407	MERGE.29011	19:+:3083615-3087407	19:+:3083615-3087407	NONMMUG020553.2	-	-	-	lncRNA	3.9392	2.4119	2.60571	1.95476	1.3754	1.00558
MERGE.59351.3	-1.63510712838155	0.0124161	0.597114	down	9:-:26763078-26778945	MERGE.59351	9:-:26763044-26806468	-	-	-	-	-	-	5.97421	1.93735	1.42345	7.945	8.62996	8.58183
NONMMUT147168.1	1.31775	0.0109171	0.577082	up	2:-:163461328-163463618	MERGE.35312	2:-:163461328-163463618	2:-:163461328-163463618	NONMMUG092574.1	-	-	-	lncRNA	1.38085	0.73508	0.69732	0.50189	0.33646	0.31331
NONMMUT092884.1	1.82465	0.0432408	0.730234	up	14:+:49212961-49219443	MERGE.18367	14:+:49212961-49220047	14:+:49212961-49219443	NONMMUG012881.2	-	-	-	lncRNA	1.0481	0.32884	0.52836	0.05714	0.28269	0.31296
MERGE.19571.1	-1.04420866055831	0.0182744	0.654839	down	14:-:100244688-100245934	MERGE.19571	14:-:100244688-100245934	-	-	-	-	-	-	2.12005	1.0804	0.97519	3.27495	2.58299	2.82164
NONMMUT077273.1	-1.92668937943095	0.00386139	0.379775	down	1:-:6200717-6202255	MERGE.20	1:-:6196344-6203804	1:-:6200717-6202255	NONMMUG047931.1	-	-	-	lncRNA	0.38602	0.34593	0.20141	1.58872	1.25217	0.89622
MERGE.53628.1	1.07321	0.00380917	0.376167	up	7:-:100990718-101011974	MERGE.53628	7:-:100990718-101012866	-	-	-	-	-	-	3.78091	2.76346	3.01374	1.81843	1.57646	1.36886
NONMMUT074393.2	-4.58518633459772	0.0448692	0.730234	down	X:-:152297649-152327244	MERGE.64112	X:-:152294828-152327495	X:-:152297649-152327244	NONMMUG046140.2	-	-	-	lncRNA	0	0.87077	0.00861	1.09739	0.4373	1.2296
NONMMUT074763.2	6.32132	0.0216215	0.68047	up	Y:-:1212111-1215972	MERGE.64395	Y:-:1212111-1215972	Y:-:1212111-1215972	NONMMUG046388.2	-	-	-	lncRNA	5.86092	2.51791	3.5964	3.75754	0.01426	0
MERGE.18871.11	-5.89504867675357	0.0224374	0.687601	down	14:-:61623149-61682313	MERGE.18871	14:-:61602836-61682768	-	-	-	-	-	-	0	0.67835	0	1.02938	0.62659	0.87285
MERGE.24538.3	-1.12552405847646	0.0047085	0.413963	down	17:-:6338921-6524953	MERGE.24538	17:-:6338907-6536055	-	-	-	-	-	-	0.6959	0.53465	0.47699	1.40534	1.19272	1.37913
MERGE.24538.1	-2.15049846470475	0.00855881	0.530055	down	17:-:6338907-6528709	MERGE.24538	17:-:6338907-6536055	-	-	-	-	-	-	2.33272	0.34694	0.91923	3.47908	4.14876	5.43316
MERGE.9528.1	-1.12119510359329	0.019287	0.660252	down	11:+:77341433-77342219	MERGE.9528	11:+:77341433-77342219	-	-	-	-	-	-	1.92495	0.93878	1.43914	2.65336	2.90339	4.22051
NONMMUT035943.2	-1.14148211451585	0.0330317	0.730234	down	2:-:18338579-18338989	MERGE.31412	2:-:18338579-18338989	2:-:18338579-18338989	NONMMUG022115.2	-	-	-	lncRNA	0.79501	0.50227	0.69618	1.63999	1.74154	1.1643
MERGE.25318.1	8.97536	0.0191614	0.65977	up	17:-:28397935-28517591	MERGE.25318	17:-:28397935-28517591	-	-	-	-	-	-	1.20593	10.8062	0.5832	0	0.03587	0
NONMMUT144044.1	-1.61450687437065	0.00262294	0.321365	down	15:-:73201866-73202973	MERGE.21151	15:-:73198811-73204492	15:-:73201866-73202973	NONMMUG090711.1	-	-	-	lncRNA	1.11258	0.75506	1.30197	4.2345	2.77037	3.31535
MERGE.58942.1	1.42062	0.0262695	0.708971	up	8:-:120828336-120829657	MERGE.58942	8:-:120828336-120829657	-	-	-	-	-	-	2.66263	1.46291	1.24452	1.17968	0.37484	0.66007
MERGE.22728.4	-10.1919901219461	4.69582e-05	0.03351	down	16:-:14109294-14159227	MERGE.22728	16:-:14109173-14163891	-	-	-	-	-	-	0.00192	0.0042	0.01384	4.76056	9.92513	7.92839
MERGE.22728.6	-8.73624914584116	0.0168967	0.644193	down	16:-:14110872-14159186	MERGE.22728	16:-:14109173-14163891	-	-	-	-	-	-	10.3508	0	0.00201	3.31246	12.1212	9.78961
MERGE.34324.10	8.33963	0.0348009	0.730234	up	2:-:130736521-130810894	MERGE.34324	2:-:130706200-130906406	-	-	-	-	-	-	0.03028	5.38635	1.5799	0	0	0
NONMMUT140568.1	3.77059	0.0176315	0.650254	up	11:+:83621662-83622903	MERGE.9781	11:+:83582056-83623694	11:+:83621662-83622903	NONMMUG007028.3	-	-	-	lncRNA	0.84454	0.31956	0.37403	0.25915	0	0
NONMMUT033827.2	-5.21673146160214	0.0180159	0.652716	down	19:-:8936088-8941685	MERGE.29461	19:-:8936088-8942678	19:-:8936088-8941685	NONMMUG020778.2	-	-	-	lncRNA	0	0.08592	0	0.17102	1.46456	0.38449
MERGE.23123.1	2.22343	0.017267	0.646805	up	16:+:25032438-25041653	MERGE.23123	16:+:25032438-25041653	-	-	-	-	-	-	1.16195	0.17212	0.55756	0.10325	0.13293	0.09468
MERGE.21034.4	6.96739	0.0261677	0.70793	up	15:-:64088541-64349886	MERGE.21034	15:-:64086857-64382919	-	-	-	-	-	-	1.22147	4.08726	1.95829	2.2306	0	0
MERGE.30045.9	4.98924	0.0190812	0.659173	up	19:-:32123479-32214325	MERGE.30045	19:-:32117167-32389714	-	-	-	-	-	-	0.9242	3.05858	3.40842	0.39614	0.00241	0.2245
MERGE.54197.1	1.53819	0.0385554	0.730234	up	7:+:122442991-122443205	MERGE.54197	7:+:122442991-122443205	-	-	-	-	-	-	2.27965	1.81926	1.71901	0.36883	0.64023	1.17832
MERGE.6970.1	-2.2219908453177	0.000513883	0.144047	down	10:-:119050887-119052013	MERGE.6970	10:-:119050887-119052013	-	-	-	-	-	-	0.47443	0.39527	0.60298	2.62686	2.11298	2.59757
MERGE.4928.2	-4.62756906687063	0.0399799	0.730234	down	10:-:30534306-30600677	MERGE.4928	10:-:30534225-30600749	-	-	-	-	-	-	0.10489	0.28646	0	1.57427	0.40828	2.68367
NONMMUT096078.1	-3.14233359352355	0.0264971	0.709861	down	15:+:76360626-76361532	MERGE.21306	15:+:76354432-76365201	15:+:76360626-76361532	NONMMUG014835.2	-	-	-	lncRNA	0.03275	0.14375	0.02629	0.88886	0.59187	0.21724
NONMMUT131682.1	4.25948	0.0125892	0.600146	up	8:-:114698440-114708007	MERGE.58198	8:-:114698439-114708007	8:-:114698440-114708007	NONMMUG041662.2	-	-	-	lncRNA	0.67709	0.46336	0.6487	0	0	0.31046
NONMMUT111444.1	-3.40268109208604	0.0204354	0.670781	down	3:+:83164587-83165369	MERGE.37547	3:+:83164587-83165369	3:+:83164587-83165369	NONMMUG069753.1	-	-	-	lncRNA	0.15175	0.08326	0.01523	0.84396	0.65045	0.30557
MERGE.11772.1	-2.29597425456913	0.0126969	0.602072	down	12:+:20224723-20224979	MERGE.11772	12:+:20224723-20224979	-	-	-	-	-	-	0.52012	0.33821	0.18556	1.5942	1.28544	2.30009
NONMMUT040754.2	7.98088	0.0228376	0.689581	up	2:-:156388063-156392979	MERGE.35117	2:-:156388063-156393048	2:-:156388063-156392979	NONMMUG025262.3	-	-	-	lncRNA	9.35782	32.5088	23.9146	0.00269	0.0028	26.7175
MERGE.36004.27	1.4901	0.0188271	0.657955	up	2:-:181582319-181590920	MERGE.36004	2:-:181569149-181592803	-	-	-	-	-	-	3.7632	4.21177	3.17512	2.27566	1.72602	0.65856
NONMMUT112927.1	-5.41903870685423	0.0236057	0.693117	down	3:-:24746174-24748251	MERGE.36449	3:-:24746174-24748251	3:-:24746174-24748251	NONMMUG070776.1	-	-	-	lncRNA	1.32942	0	0	0.58513	0.97374	1.07691
NONMMUT032213.2	-1.30257559998237	0.0201539	0.6677	down	18:-:44632363-44633766	MERGE.28093	18:-:44632363-44633766	18:-:44632363-44633766	NONMMUG019827.2	-	-	-	lncRNA	0.65587	0.24764	0.36514	1.03547	1.30394	0.73179
MERGE.18749.21	-7.77530398555811	0.0248716	0.701107	down	14:-:57689662-57746105	MERGE.18749	14:-:57575384-57758388	-	-	-	-	-	-	0	6.04667	0	4.21278	6.97275	4.30158
NONMMUT048832.2	-1.05767160780466	0.0160118	0.635776	down	4:+:116267146-116270414	MERGE.41911	4:+:116267146-116270414	4:+:116267146-116270414	NONMMUG030325.2	-	-	-	lncRNA	0.76329	0.46531	0.42306	1.09564	1.019	1.5155
MERGE.60271.2	-4.3990023186179	0.0333888	0.730234	down	9:-:58874687-59036411	MERGE.60271	9:-:58874659-59037038	-	-	-	-	-	-	0.23078	0.32107	0.1654	26.9517	0.58818	8.82185
NONMMUT133339.1	4.95506	0.0207958	0.674538	up	9:+:96503270-96527918	MERGE.61245	9:+:96503270-96527918	9:+:96503270-96527918	NONMMUG043667.2	-	-	-	lncRNA	0.76478	0.7946	0.82743	0	0.8526	0
MERGE.54031.10	-1.41866839609981	0.0336715	0.730234	down	7:-:116388076-116443419	MERGE.54031	7:-:116337265-116443449	-	-	-	-	-	-	2.34951	0.92076	2.26319	2.63581	6.23697	7.29162
NONMMUT008269.2	1.10588	0.0306747	0.730234	up	11:-:3341843-3344178	MERGE.7427	11:-:3341843-3409189	11:-:3341843-3344178	NONMMUG005104.2	-	-	-	lncRNA	7.27355	3.7767	4.72088	2.80622	3.75942	1.52432
MERGE.48714.1	-1.32062299178001	0.00930168	0.545062	down	6:+:54136600-54139011	MERGE.48714	6:+:54136600-54139011	-	-	-	-	-	-	1.50863	0.54956	0.91937	2.18082	2.23708	3.02843
NONMMUT035184.2	5.63517	0.0187905	0.657955	up	19:+:56746497-56753898	MERGE.30756	19:+:56725449-56766290	19:+:56746497-56753898	NONMMUG021683.2	-	-	-	lncRNA	0.88939	0.48891	0.77789	0.00229	0	0.77216
NONMMUT031539.2	-1.16739637330499	0.0269722	0.713081	down	18:-:13818093-13819367	MERGE.27370	18:-:13818093-13819367	18:-:13818093-13819367	NONMMUG019379.2	-	-	-	lncRNA	0.41936	0.25565	0.20572	0.77744	0.58298	0.61817
MERGE.5373.1	-1.00224522536111	0.0185709	0.656761	down	10:-:53695218-53696909	MERGE.5373	10:-:53695218-53696909	-	-	-	-	-	-	1.82581	1.04027	0.85259	2.36677	2.63583	2.59527
NONMMUT140381.1	2.23022	0.0314072	0.730234	up	11:+:33513833-33514378	MERGE.8146	11:+:33513833-33514378	11:+:33513833-33514378	NONMMUG088556.1	-	-	-	lncRNA	0.62565	0.79597	2.03069	0.19365	0.2521	0.20622
MERGE.20172.1	-1.25134355617245	0.0329077	0.730234	down	15:-:26844305-26844993	MERGE.20172	15:-:26844305-26844993	-	-	-	-	-	-	2.19874	0.72538	0.69214	2.78139	3.03666	1.96101
MERGE.50440.3	1.85949	0.00402843	0.388239	up	6:-:124959234-124965512	MERGE.50440	6:-:124958413-124965538	-	-	-	-	-	-	11.5199	22.2385	21.3996	7.05987	4.97008	3.82705
MERGE.34744.1	1.65235	0.0111454	0.579591	up	2:-:148299615-148301004	MERGE.34744	2:-:148299615-148301004	-	-	-	-	-	-	2.44689	0.93799	1.07213	0.39934	0.3565	0.64803
MERGE.18615.15	-6.45946655632991	0.00650163	0.473384	down	14:-:54643288-54686602	MERGE.18615	14:-:54641533-54686931	-	-	-	-	-	-	0.24	0	0	0.48814	0.74035	0.92919
MERGE.22367.5	2.97639	0.0259234	0.706172	up	15:-:102177313-102203761	MERGE.22367	15:-:102176999-102205490	-	-	-	-	-	-	2.58389	2.15812	0.3593	0.19312	0.13199	0.17352
MERGE.61015.1	-1.92160358552375	0.00024859	0.0927707	down	9:+:88559498-88562986	MERGE.61015	9:+:88559498-88562986	-	-	-	-	-	-	1.89432	0.96536	1.24723	5.06079	5.18008	5.7322
NONMMUT037133.2	-3.88543276854339	0.0254365	0.703934	down	2:+:45277039-45282909	NONMMUG022879.2	2:+:45239205-45282909	2:+:45277039-45282909	NONMMUG022879.2	-	-	-	lncRNA	0	0.08538	0.14054	0.41545	0.50931	0.85718
MERGE.58951.35	5.82916	0.0237699	0.694213	up	8:-:121058803-121067957	MERGE.58951	8:-:121041758-121090511	-	-	-	-	-	-	0.73574	0.64152	0.99028	0	1.13646	0
NONMMUT079654.1	1.678	0.0232192	0.692731	up	10:+:3483342-3484449	MERGE.4099	10:+:3483342-3484449	10:+:3483342-3484449	NONMMUG049542.1	-	-	-	lncRNA	0.83108	0.39224	0.63484	0.31013	0.09939	0.20324
NONMMUT107213.1	-1.04372105051509	0.0409327	0.730234	down	2:+:67784066-67785920	MERGE.32710	2:+:67784066-67785920	2:+:67784066-67785920	NONMMUG067022.1	-	-	-	lncRNA	0.45638	0.31629	0.22495	0.54861	0.88303	0.67526
NONMMUT075144.1	-1.41374088357918	0.0279692	0.71861	down	1:+:23320601-23321989	MERGE.385	1:+:23320601-23321989	1:+:23320601-23321989	NONMMUG046591.1	-	-	-	lncRNA	0.33148	0.62577	0.48066	2.07428	1.26847	0.93221
MERGE.19481.1	-1.34069590494611	0.00520082	0.429571	down	14:-:98088510-98091675	MERGE.19481	14:-:98088510-98091675	-	-	-	-	-	-	3.04927	1.42075	1.51004	4.29136	4.83467	6.30367
MERGE.30125.1	-1.51751113426323	0.0112584	0.579911	down	19:-:33351349-33352819	MERGE.30125	19:-:33351349-33352819	-	-	-	-	-	-	0.70677	0.5835	0.29177	1.82388	1.21648	1.52129
MERGE.42886.8	-10.91365567283	7.33407e-07	0.00428509	down	4:-:141467890-141538253	MERGE.42886	4:-:141467890-141538597	-	-	-	-	-	-	0	0	0	1.14294	1.38567	0.82133
MERGE.42886.2	-11.0696815559996	1.29199e-06	0.00561765	down	4:-:141467890-141538253	MERGE.42886	4:-:141467890-141538597	-	-	-	-	-	-	0	0	0	1.37081	1.5762	0.84288
NONMMUT122188.1	1.07485	0.0469619	0.730234	up	6:+:47769557-47770840	MERGE.48450	6:+:47646570-47777275	6:+:47769557-47770840	NONMMUG035236.2	-	-	-	lncRNA	1.56157	0.59233	1.10493	0.46319	0.67538	0.38365
MERGE.60593.17	1.91342	0.0415034	0.730234	up	9:-:67024326-67043709	MERGE.60593	9:-:67022590-67049406	-	-	-	-	-	-	9.2353	4.89814	6.36541	6.11961	0.6995	1.42125
MERGE.55340.1	-6.94351779566643	0.000169318	0.072942	down	8:+:21012171-21012882	MERGE.55340	8:+:21012171-21012882	-	-	-	-	-	-	0.04172	0	0	1.37361	2.62925	2.86626
NONMMUT105327.1	2.57614	0.0035284	0.366141	up	19:+:23182172-23183037	MERGE.29834	19:+:23182172-23183037	19:+:23182172-23183037	NONMMUG065863.1	-	-	-	lncRNA	1.35489	0.6524	1.41799	0.21366	0.20663	0.13002
NONMMUT105842.1	-1.65009265296887	0.0468761	0.730234	down	19:-:8475637-8476780	MERGE.29418	19:-:8475637-8476780	19:-:8475637-8476780	NONMMUG066153.1	-	-	-	lncRNA	1.09055	0.16146	0.41686	0.98199	1.09493	2.2514
NONMMUT022958.2	-1.18277702013758	0.0327615	0.730234	down	15:+:27503912-27505532	MERGE.20202	15:+:27503912-27505532	15:+:27503912-27505532	NONMMUG014198.2	-	-	-	lncRNA	0.33901	0.17427	0.17652	0.41582	0.68782	0.47754
MERGE.46106.1	1.6739	0.00904845	0.541717	up	5:-:115138715-115140188	MERGE.46106	5:-:115138715-115140188	-	-	-	-	-	-	0.91693	0.42752	0.46912	0.17933	0.18677	0.17187
MERGE.5376.1	-1.51216132059877	0.0184553	0.656239	down	10:-:53729198-53729614	MERGE.5376	10:-:53729198-53729614	-	-	-	-	-	-	1.06851	0.80771	0.40026	2.47213	1.84852	1.99133
NONMMUT045726.2	-3.88436786375577	0.00753949	0.503078	down	3:-:149284418-149445301	MERGE.39505	3:-:148815583-149445439	3:-:149284418-149445301	NONMMUG028231.2	-	-	-	lncRNA	0.05694	0.0119	0.49621	1.19425	1.14582	1.31032
NONMMUT006136.2	-1.11473773171688	0.0148655	0.625699	down	10:-:71127030-71129718	MERGE.5760	10:-:71127030-71129718	10:-:71127030-71129718	NONMMUG003955.2	-	-	-	lncRNA	1.83536	0.66925	0.95196	2.43724	2.40755	2.53124
NONMMUT129239.1	1.05359	0.0341043	0.730234	up	8:+:94789154-94791250	NONMMUG081146.1	8:+:94787475-94791250	8:+:94789154-94791250	NONMMUG081146.1	-	-	-	lncRNA	0.70118	0.4404	0.44914	0.22059	0.22318	0.36243
NONMMUT033958.2	1.43008	0.0111108	0.579591	up	19:-:12524512-12526116	MERGE.29615	19:-:12524512-12526116	19:-:12524512-12526116	NONMMUG020861.2	-	-	-	lncRNA	1.50836	1.57729	1.16622	0.37055	0.71183	0.64891
NONMMUT147483.1	1.34962	0.0147711	0.625329	up	3:+:100489561-100490074	MERGE.38331	3:+:100489561-100530984	3:+:100489561-100490074	NONMMUG027410.3	-	-	-	lncRNA	2.97624	1.90243	1.64683	0.74567	0.77662	1.09528
MERGE.14304.18	-1.89563880263013	0.0430601	0.730234	down	13:-:9689532-9735884	MERGE.14304	13:-:9684833-9765330	-	-	-	-	-	-	0.27511	1.53683	1.52289	2.72785	4.49668	3.4568
NONMMUT066317.2	-1.40103441044471	0.0484216	0.730234	down	8:+:82933655-82934033	MERGE.57015	8:+:82933655-82934033	8:+:82933655-82934033	NONMMUG041048.2	-	-	-	lncRNA	1.44996	0.34401	0.56622	1.25538	1.99754	2.11672
MERGE.39505.23	-8.78876013288634	1.04334e-06	0.00496372	down	3:-:148817745-148988248	MERGE.39505	3:-:148815583-149445439	-	-	-	-	-	-	0	0	0	0.64007	0.62184	0.46609
NONMMUT009435.2	-1.16762890697755	0.00661291	0.475344	down	11:+:44739728-44742254	MERGE.8268	11:+:44736045-44742254	11:+:44739728-44742254	NONMMUG005884.2	-	-	-	lncRNA	1.47524	0.78682	0.78317	2.29077	2.57649	2.18885
MERGE.42417.6	-8.33943498020708	0.00646705	0.472869	down	4:-:130166977-130174820	MERGE.42417	4:-:130164454-130175122	-	-	-	-	-	-	9.38855	0	0	15.1272	15.158	17.0588
MERGE.64226.1	-1.51188552760337	0.0293387	0.726531	down	X:+:159828682-159829111	MERGE.64226	X:+:159828682-159829111	-	-	-	-	-	-	0.96713	0.48008	0.55452	1.47532	1.47252	3.14218
NONMMUT137605.1	-1.82469862958981	0.0363823	0.730234	down	X:-:162554763-162627330	MERGE.64283	X:-:162411734-162643649	X:-:162554763-162627330	NONMMUG087028.1	-	-	-	lncRNA	0.39006	0.10975	0.19268	0.4539	0.91766	0.93829
MERGE.40332.1	2.03972	0.00958895	0.55368	up	4:-:41110749-41111451	MERGE.40332	4:-:41110749-41111451	-	-	-	-	-	-	1.66903	0.8964	2.08595	0.6016	0.31328	0.24024
MERGE.20904.1	-1.7575971367644	0.0102458	0.565749	down	15:+:57940863-57941837	MERGE.20904	15:+:57940863-57941837	-	-	-	-	-	-	0.51793	0.42346	0.34238	1.13864	1.2706	2.45399
MERGE.22856.1	-2.28853625369805	0.0010906	0.213962	down	16:-:17651212-17722887	MERGE.22856	16:-:17651212-17722930	-	-	-	-	-	-	3.38848	1.12125	1.07528	8.78933	8.58471	7.48731
ENSMUST00000228591	1.90994	0.0236619	0.693271	up	14:+:45530358-45544887	MERGE.18227	14:+:45530358-45598513	14:+:45530358-45544887	ENSMUSG00000115324	67651	-	AC107711.2	RIKEN cDNA 4930527F14 gene	0.70039	0.33153	0.79371	0.20164	0.15273	0.0976
MERGE.27871.8	1.73287	0.00829316	0.524359	up	18:-:36667429-36679500	MERGE.27871	18:-:36666681-36679500	-	-	-	-	-	-	1.07357	1.39468	0.77559	0.23718	0.30878	0.53673
MERGE.27871.7	5.4045	0.0112157	0.579911	up	18:-:36667429-36679498	MERGE.27871	18:-:36666681-36679500	-	-	-	-	-	-	0.9141	1.53484	0.88976	0.34906	0.03002	0
MERGE.12209.1	-1.12405413089198	0.0139246	0.61557	down	12:+:38838348-38840242	MERGE.12209	12:+:38838348-38840242	-	-	-	-	-	-	1.23834	0.76829	0.85563	1.65292	2.20819	2.90399
MERGE.53429.1	-1.08762736169838	0.0301463	0.730234	down	7:+:97054149-97055297	MERGE.53429	7:+:97054149-97055297	-	-	-	-	-	-	1.57701	0.67138	0.70557	1.57585	2.4439	2.19261
MERGE.61007.9	-7.09515005669996	0.0170278	0.644985	down	9:-:88407432-88477688	MERGE.61007	9:-:88376750-88482574	-	-	-	-	-	-	0.00276	0	0.59287	2.13138	0.918	0.65541
NONMMUT098372.1	-3.6434435353054	0.0102906	0.56687	down	16:+:40043257-40045270	NONMMUG061476.1	16:+:40043257-40045270	16:+:40043257-40045270	NONMMUG061476.1	-	-	-	lncRNA	0.04425	0.02158	0.04736	0.25593	0.46475	1.07619
MERGE.34404.11	12.5212	7.52674e-08	0.00344305	up	2:-:132529115-132578187	MERGE.34404	2:-:132527223-132587729	-	-	-	-	-	-	7.14718	7.54673	6.58584	0	0	0
MERGE.22367.7	-5.36292666648111	0.0205408	0.67129	down	15:-:102177319-102204233	MERGE.22367	15:-:102176999-102205490	-	-	-	-	-	-	0	0	0.73004	0.75327	1.17355	0.65632
MERGE.20532.1	1.38639	0.0416604	0.730234	up	15:-:36020154-36020661	MERGE.20532	15:-:36020154-36020661	-	-	-	-	-	-	3.56689	1.62547	2.34688	0.72846	0.59612	1.99479
MERGE.19490.1	-1.50948574982298	0.00180179	0.271455	down	14:-:98140641-98143170	MERGE.19490	14:-:98140641-98143170	-	-	-	-	-	-	1.53555	1.16773	1.22564	3.13426	4.50253	4.58731
MERGE.55315.1	-1.27036072535262	0.0232361	0.692731	down	8:+:18690458-18692192	MERGE.55315	8:+:18690458-18692192	-	-	-	-	-	-	1.38678	0.49472	0.46039	1.58444	1.53119	2.14968
MERGE.3635.3	-5.51394339405345	0.0429763	0.730234	down	1:-:178321108-178330320	MERGE.3635	1:-:178321108-178337797	-	-	-	-	-	-	0.71066	0	0.38167	7.89344	0.73918	5.56675
MERGE.19330.3	1.36183	0.00241914	0.309119	up	14:-:78081840-78089002	MERGE.19330	14:-:78081021-78089007	-	-	-	-	-	-	1.76471	1.97967	1.97573	0.80395	0.85688	0.73612
MERGE.38524.2	1.69337	0.0314168	0.730234	up	3:-:106147554-106219556	MERGE.38524	3:-:106147554-106349627	-	-	-	-	-	-	28.4607	31.2608	40.0007	3.89501	14.5623	22.0599
MERGE.31705.1	1.43538	0.0278149	0.717081	up	2:+:27124271-27125220	MERGE.31705	2:+:27124271-27125220	-	-	-	-	-	-	3.25187	1.09794	1.25496	0.44518	0.69549	0.82965
NONMMUT054399.2	-2.63828636854571	0.0171038	0.645614	down	5:-:123133735-123138575	MERGE.46423	5:-:123133723-123142055	5:-:123133735-123138575	NONMMUG033747.2	-	-	-	lncRNA	0.02105	0.18481	0.10984	0.63693	0.41948	0.77803
MERGE.52455.1	-2.90008952056306	0.00085502	0.194478	down	7:-:48369574-48369891	MERGE.52455	7:-:48369574-48369891	-	-	-	-	-	-	0.8407	0.41	0.74982	4.57171	4.11215	6.6831
MERGE.55612.1	1.05735	0.027187	0.714183	up	8:+:33654609-33664114	MERGE.55612	8:+:33654609-33664114	-	-	-	-	-	-	2.64204	0.94866	1.64923	0.81195	0.79496	0.88094
MERGE.41925.5	4.89135	0.0437613	0.730234	up	4:+:116596678-116600222	MERGE.41925	4:+:116596526-116602751	-	-	-	-	-	-	3.47694	3.19942	0.82411	0.067	0	2.10142
NONMMUT028251.2	-2.14004334435062	0.0476571	0.730234	down	17:+:12799770-12801824	MERGE.24654	17:+:12741311-12860182	17:+:12799770-12801824	NONMMUG017493.2	-	-	-	lncRNA	1.25757	0.24321	0.33069	2.47606	0.7636	5.16402
MERGE.54606.14	-5.22680794202467	0.0237447	0.694213	down	7:-:130492786-130519461	MERGE.54606	7:-:130391493-130520369	-	-	-	-	-	-	0.00887	0.01802	2.7332	2.61084	3.40401	3.55896
MERGE.49226.8	-1.36027244730421	0.0220683	0.684501	down	6:-:83368042-83457612	MERGE.49226	6:-:83362373-83459084	-	-	-	-	-	-	4.73884	1.39898	1.46132	4.91667	6.89782	5.76329
NONMMUT082807.1	-2.15516330987334	0.00535606	0.435052	down	10:-:119057677-119058950	MERGE.6972	10:-:119057677-119076209	10:-:119057677-119058950	NONMMUG004829.2	-	-	-	lncRNA	0.38471	0.69932	0.67378	2.22002	2.15009	4.5957
MERGE.36892.3	7.26873	0.00491539	0.419147	up	3:-:51252721-51277368	MERGE.36892	3:-:51252720-51340663	-	-	-	-	-	-	1.176	0.04456	0.6356	0	0	0
NONMMUT075573.1	2.36412	0.0495127	0.730234	up	1:+:63114096-63115331	MERGE.1050	1:+:63113078-63158295	1:+:63114096-63115331	NONMMUG000830.2	-	-	-	lncRNA	1.06946	0.29008	1.49509	0.05346	0.3341	0.18219
NONMMUT054052.2	-2.47253036399132	0.0369887	0.730234	down	5:-:115332828-115333891	MERGE.46129	5:-:115332828-115341178	5:-:115332828-115333891	NONMMUG033507.2	-	-	-	lncRNA	0.73982	0.83734	0.41459	9.20428	1.09964	5.35724
NONMMUT127621.1	-1.16686777431019	0.0300634	0.730234	down	7:-:109643594-109644596	MERGE.53848	7:-:109643594-109644596	7:-:109643594-109644596	NONMMUG080115.1	-	-	-	lncRNA	1.55483	0.4658	0.6181	1.73935	1.94877	1.6979
MERGE.38669.1	-1.20547329353939	0.027891	0.718037	down	3:+:109491053-109492050	MERGE.38669	3:+:109491053-109492050	-	-	-	-	-	-	1.30962	0.60966	0.63314	1.3905	1.95853	2.70769
MERGE.2867.1	-2.13903298756075	0.00680029	0.479785	down	1:-:151247336-151248023	MERGE.2867	1:-:151247336-151248023	-	-	-	-	-	-	0.38858	0.12634	0.41589	1.59442	1.06038	1.16604
MERGE.10747.12	4.54418	0.0440407	0.730234	up	11:-:106822025-106920715	MERGE.10747	11:-:106820066-106920761	-	-	-	-	-	-	2.05372	0.76125	0.85742	0	0.26024	0.45393
NONMMUT004416.2	-3.64479057775335	0.0488566	0.730234	down	1:+:192138815-192149108	MERGE.4048	1:+:192136896-192151026	1:+:192138815-192149108	NONMMUG002854.2	-	-	-	lncRNA	0	0.01906	1.25496	1.62307	0.67617	0.96298
NONMMUT083054.1	-1.74650786546533	0.0325087	0.730234	down	10:-:130519526-130521322	MERGE.7389	10:-:130519526-130521322	10:-:130519526-130521322	NONMMUG051693.1	-	-	-	lncRNA	0.30581	0.09069	0.1725	0.42657	0.4213	1.11999
MERGE.11840.1	-6.14126755378211	3.32543e-05	0.0279103	down	12:-:23080237-23080552	MERGE.11840	12:-:23080237-23080552	-	-	-	-	-	-	0	0	0	1.17107	1.21967	2.22695
MERGE.35397.3	1.84598	0.0283971	0.721601	up	2:-:164886847-164911569	MERGE.35397	2:-:164884522-164911765	-	-	-	-	-	-	2.51054	3.25351	2.22237	1.33265	1.33787	0.24782
MERGE.4641.1	-2.6661543284446	0.0386555	0.730234	down	10:+:18375480-18375922	MERGE.4641	10:+:18375480-18375922	-	-	-	-	-	-	0.46937	0.63767	0.05382	1.37236	1.18073	2.60518
MERGE.2524.6	-4.69918098852685	0.0251503	0.702508	down	1:-:131265927-131267040	MERGE.2524	1:-:131254343-131279606	-	-	-	-	-	-	0.23369	0	3.29318	5.86882	3.56154	6.34822
MERGE.15190.10	-1.79972021394075	0.0222455	0.685406	down	13:-:45556429-45688483	MERGE.15190	13:-:45549755-45965008	-	-	-	-	-	-	0.49615	1.7171	2.33208	4.15991	4.71943	4.80821
MERGE.15190.15	1.65389	0.012656	0.601472	up	13:-:45557212-45964906	MERGE.15190	13:-:45549755-45965008	-	-	-	-	-	-	2.34789	0.95982	2.9251	0.65231	0.85169	0.46814
MERGE.16411.1	-1.37180029395221	0.0338539	0.730234	down	13:-:92068610-92069729	MERGE.16411	13:-:92068610-92069729	-	-	-	-	-	-	2.50632	0.54325	1.4264	2.78488	3.15855	4.5239
NONMMUT110337.1	-1.23323137491159	0.0341036	0.730234	down	2:-:175023602-175024451	MERGE.35697	2:-:175023602-175024451	2:-:175023602-175024451	NONMMUG068973.1	-	-	-	lncRNA	0.2621	0.26843	0.29455	0.69969	0.87447	0.5133
NONMMUT062867.2	-1.36848663323974	0.00772139	0.508006	down	7:-:98600334-98601914	MERGE.53501	7:-:98587137-98656783	7:-:98600334-98601914	NONMMUG038790.2	-	-	-	lncRNA	0.93942	0.8659	0.55803	1.90597	1.94154	2.68846
MERGE.25360.3	1.95101	0.0025235	0.313913	up	17:-:29332114-29347904	MERGE.25360	17:-:29332072-29347904	-	-	-	-	-	-	2.70234	3.52128	4.35535	0.86419	1.33051	0.76023
MERGE.38121.1	1.23196	0.00493654	0.419636	up	3:-:95656554-95658664	MERGE.38121	3:-:95656554-95658664	-	-	-	-	-	-	2.29363	1.29701	1.96537	0.85146	0.88679	0.73339
NONMMUT011890.2	-1.27251268149387	0.0180374	0.653054	down	11:-:98524124-98528701	MERGE.10377	11:-:98524124-98528701	11:-:98524124-98528701	NONMMUG007523.2	-	-	-	lncRNA	0.34389	0.18986	0.24219	1.0393	0.51415	0.50112
MERGE.30805.2	7.76029	0.0297677	0.729147	up	19:-:57031187-57197736	MERGE.30805	19:-:57029126-57314919	-	-	-	-	-	-	2.49424	1.55298	0.23796	0	0.20827	0
MERGE.26538.1	-1.05629842258978	0.021477	0.679172	down	17:-:67328056-67336920	MERGE.26538	17:-:67328056-67336920	-	-	-	-	-	-	8.37084	3.40028	3.91543	10.4979	9.02661	11.5133
MERGE.29641.1	-1.47514725515066	0.0128284	0.603344	down	19:-:15963233-15963848	MERGE.29641	19:-:15963233-15963848	-	-	-	-	-	-	1.20554	0.40567	0.85158	1.84515	2.48036	2.2391
NONMMUT110756.1	-1.77551705477074	0.00245751	0.311085	down	3:+:25730925-25733810	MERGE.36306	3:+:25730925-25733810	3:+:25730925-25733810	NONMMUG069296.1	-	-	-	lncRNA	0.4305	0.523	0.35791	1.61443	1.94504	1.2967
NONMMUT058148.2	-1.24232462917001	0.014543	0.62424	down	6:+:97897481-97900243	MERGE.49761	6:+:97897481-97900243	6:+:97897481-97900243	NONMMUG036111.2	-	-	-	lncRNA	0.66655	0.43256	0.47464	1.01885	1.13088	1.99679
NONMMUT027626.2	1.07209	0.0167469	0.642411	up	16:-:90348725-90349642	MERGE.24147	16:-:90348725-90349642	16:-:90348725-90349642	NONMMUG017113.2	-	-	-	lncRNA	2.34595	1.51495	2.33767	1.00779	1.27453	0.8279
NONMMUT123063.1	2.93481	0.00390907	0.381351	up	6:+:127840513-127843097	MERGE.50521	6:+:127840513-127843097	6:+:127840513-127843097	NONMMUG077184.1	-	-	-	lncRNA	1.08591	0.38248	0.69642	0.21473	0.05325	0.05445
MERGE.1554.4	-1.01190869496654	0.0102997	0.56687	down	1:-:85717692-85736561	MERGE.1554	1:-:85717083-85778643	-	-	-	-	-	-	1.48022	0.85487	1.2418	2.85472	2.03198	2.72891
NONMMUT098377.1	-6.30271853957737	2.51857e-05	0.0234653	down	16:+:40054060-40054839	NONMMUG061481.1	16:+:40054060-40054839	16:+:40054060-40054839	NONMMUG061481.1	-	-	-	lncRNA	0	0	0	0.47443	0.68824	0.92025
MERGE.48169.13	-5.7364614685276	0.0323332	0.730234	down	6:-:38126020-38196234	MERGE.48169	6:-:38048483-38254009	-	-	-	-	-	-	0.0063	0	1.30577	1.24207	0.63611	1.79609
MERGE.47051.1	-1.96008316349235	0.047384	0.730234	down	5:-:140973153-140973852	MERGE.47051	5:-:140973153-140973852	-	-	-	-	-	-	0.99723	0.10865	0.59611	2.85097	1.0422	1.26669
MERGE.42010.1	-1.71058563280426	0.0453042	0.730234	down	4:-:118081592-118081993	MERGE.42010	4:-:118081592-118081993	-	-	-	-	-	-	0.8867	0.43244	0.47451	1.24931	1.43812	4.09626
MERGE.60549.3	5.29095	0.0206805	0.673178	up	9:-:65831136-65908786	MERGE.60549	9:-:65828930-65908794	-	-	-	-	-	-	0.4668	0.75773	1.78873	0.00303	0.4863	0.00323
MERGE.40892.1	-1.22693324476357	0.0369869	0.730234	down	4:+:59708104-59710122	MERGE.40892	4:+:59708104-59710122	-	-	-	-	-	-	2.59676	0.65653	1.45262	2.69041	3.21794	4.62871
NONMMUT027397.2	-4.58311798340527	0.0118303	0.588023	down	16:+:77679899-77691397	MERGE.23994	16:+:77236317-77691403	16:+:77679899-77691397	NONMMUG016963.2	-	-	-	lncRNA	0	0.71679	0	1.33082	1.48164	2.59007
NONMMUT115237.1	-1.34360788181707	0.0294555	0.727281	down	4:+:85871436-85872279	MERGE.41299	4:+:85871436-85872279	4:+:85871436-85872279	NONMMUG072267.1	-	-	-	lncRNA	0.31675	0.45056	0.3814	0.75164	1.15795	1.30071
MERGE.50631.15	-3.20354568516408	0.0285101	0.722186	down	6:-:129424772-129451851	MERGE.50631	6:-:129375515-129452000	-	-	-	-	-	-	0.29014	0.1231	0.08617	3.80304	0.30923	2.27653
NONMMUT077712.1	-5.1826025313771	0.000519627	0.145221	down	1:-:42943637-42944427	NONMMUG048221.1	1:-:42943637-42944427	1:-:42943637-42944427	NONMMUG048221.1	-	-	-	lncRNA	0	0.02747	0	0.36759	0.55686	0.60497
MERGE.59777.2	-8.01877272726141	0.00160127	0.252219	down	9:-:44310211-44317666	MERGE.59777	9:-:44309237-44320285	-	-	-	-	-	-	0	0.09506	0	3.63294	1.2696	2.17041
MERGE.6939.11	-9.33623256582157	0.000338823	0.112122	down	10:-:117349374-117376915	MERGE.6939	10:-:117344673-117380015	-	-	-	-	-	-	0	0.05221	0	6.65319	5.52911	2.72243
MERGE.15953.1	1.45284	0.00996196	0.560891	up	13:-:68213687-68214132	MERGE.15953	13:-:68213687-68214132	-	-	-	-	-	-	3.79632	3.9952	3.28794	1.12606	1.29624	2.01964
MERGE.55710.1	-1.08843272026337	0.0478937	0.730234	down	8:-:36884228-36884830	MERGE.55710	8:-:36884228-36884830	-	-	-	-	-	-	2.58622	1.17119	0.79086	2.52054	3.19583	3.31436
NONMMUT148867.1	-1.39047105072669	0.00267821	0.324101	down	5:+:9165329-9166007	MERGE.43707	5:+:9165329-9166007	5:+:9165329-9166007	NONMMUG093611.1	-	-	-	lncRNA	2.36237	1.52014	1.51002	4.69095	4.70317	5.49293
MERGE.64444.1	-6.74564309912961	0.00059722	0.154869	down	Y:+:74732140-74732587	MERGE.64444	Y:+:74732140-74732587	-	-	-	-	-	-	0.09946	0	0.10645	4.18913	7.6813	8.73363
NONMMUT019385.2	-1.33007322130694	0.00147101	0.241891	down	13:+:113814050-113815735	MERGE.16995	13:+:113814050-113815735	13:+:113814050-113815735	NONMMUG012017.2	-	-	-	lncRNA	2.44895	1.77217	1.67589	5.48724	5.12713	5.11718
NONMMUT021761.2	1.72497	0.0251305	0.702508	up	14:+:78858178-78861243	MERGE.19344	14:+:78858178-78861243	14:+:78858178-78861243	NONMMUG013527.2	-	-	-	lncRNA	0.92524	0.25869	0.39274	0.25002	0.09428	0.11476
NONMMUT028025.2	5.29131	0.00247675	0.312674	up	17:+:5492609-5725317	MERGE.24469	17:+:5492600-5754829	17:+:5492609-5725317	NONMMUG017361.2	-	-	-	lncRNA	0.80211	0.19344	0.62264	0	0.01634	0.01671
MERGE.19139.3	4.80686	0.0295117	0.727931	up	14:-:70180468-70206022	MERGE.19139	14:-:70180468-70211989	-	-	-	-	-	-	0.83869	1.09721	2.26546	0	0.0987	0.66019
NONMMUT041889.2	1.34371	0.00894126	0.539439	up	2:-:181185044-181187714	MERGE.35950	2:-:181185044-181187714	2:-:181185044-181187714	NONMMUG025932.2	-	-	-	lncRNA	0.7896	0.50847	0.54009	0.35626	0.20098	0.21077
MERGE.64382.1	7.04814	0.0213694	0.677632	up	Y:+:1040495-1047883	MERGE.64382	Y:+:1040495-1047883	-	-	-	-	-	-	1.87538	1.56454	1.68127	2.52022	0	0
MERGE.55610.3	1.05218	0.0289462	0.724224	up	8:+:33665479-33666488	MERGE.55610	8:+:33652523-33698163	-	-	-	-	-	-	3.941	1.5921	3.13989	1.68804	1.18569	1.35169
NONMMUT021928.2	1.67186	0.00629706	0.465721	up	14:-:93880735-93883672	MERGE.19467	14:-:93880735-93885229	14:-:93880735-93883672	NONMMUG013620.2	-	-	-	lncRNA	1.34975	1.10573	0.64927	0.31039	0.26705	0.43593
NONMMUT141773.1	-4.7313725699047	0.00330263	0.354875	down	12:-:21956643-21958482	NONMMUG089368.1	12:-:21956643-21979347	12:-:21956643-21958482	NONMMUG089368.1	-	-	-	lncRNA	0	0.02362	0.05184	0.37351	0.62092	0.55074
NONMMUT077259.1	-2.80821660884991	0.00333608	0.356421	down	1:-:6173972-6176068	MERGE.15	1:-:6173972-6176068	1:-:6173972-6176068	NONMMUG047922.1	-	-	-	lncRNA	0.02833	0.10362	0.09097	0.5042	0.49887	0.5772
NONMMUT019036.2	-1.28771458163351	0.0272403	0.714183	down	13:-:105042453-105044734	MERGE.16798	13:-:105042453-105044734	13:-:105042453-105044734	NONMMUG011858.2	-	-	-	lncRNA	0.26034	0.21425	0.16718	0.71816	0.34985	0.64759
MERGE.451.1	-1.5627349690233	0.0174969	0.649304	down	1:-:33509590-33510118	MERGE.451	1:-:33509590-33510118	-	-	-	-	-	-	0.50537	0.69832	1.26208	2.02368	3.04441	2.44771
NONMMUT140782.1	-2.68322173563705	0.0318042	0.730234	down	11:-:6100262-6100955	MERGE.7557	11:-:6093877-6101438	11:-:6100262-6100955	NONMMUG005231.3	-	-	-	lncRNA	0.0642	0.86106	0.06872	1.04741	1.26938	1.521
MERGE.49764.8	8.26222	0.00754324	0.503078	up	6:-:97287613-97617529	MERGE.49764	6:-:97286867-97617541	-	-	-	-	-	-	6.14756	5.24354	3.95504	2.07727	0	0
MERGE.8635.1	-1.20913476632441	0.0299273	0.730201	down	11:+:57646353-57647159	MERGE.8635	11:+:57646353-57647159	-	-	-	-	-	-	1.39873	0.48468	1.28529	2.11266	2.14916	2.79045
MERGE.37320.11	-3.95897350166283	0.0301972	0.730234	down	3:-:65948508-65958181	MERGE.37320	3:-:65946151-65958249	-	-	-	-	-	-	0.26014	0.29735	0	0.82467	1.15272	1.19405
MERGE.57455.1	5.8439	0.0310894	0.730234	up	8:-:95323011-95331950	MERGE.57455	8:-:95323011-95331950	-	-	-	-	-	-	0.90831	0.57887	6.61297	0.00529	0.00368	0.75549
MERGE.18942.1	-1.82634349709034	0.00813292	0.521718	down	14:-:63378907-63379589	MERGE.18942	14:-:63378907-63379589	-	-	-	-	-	-	0.26095	0.33406	0.41893	1.68349	1.28983	0.94791
NONMMUT127337.1	-1.79214690009875	0.0451857	0.730234	down	7:-:75769109-75773055	MERGE.53012	7:-:75769038-75782233	7:-:75769109-75773055	NONMMUG038402.2	-	-	-	lncRNA	3.97365	2.46093	3.59144	6.67015	35.7601	7.04252
MERGE.50119.1	1.03625	0.0376582	0.730234	up	6:+:116310453-116311389	MERGE.50119	6:+:116310453-116311389	-	-	-	-	-	-	1.58509	0.99721	1.17058	0.76167	0.41133	0.78107
MERGE.23977.1	-3.29114912149878	0.00631521	0.466325	down	16:-:79943417-79943695	MERGE.23977	16:-:79943417-79943695	-	-	-	-	-	-	0.21294	0.38943	0.1282	1.51586	2.5655	3.32941
NONMMUT012453.2	-1.88635057630671	0.00753209	0.502787	down	11:-:107386499-107387836	MERGE.10780	11:-:107386499-107387836	11:-:107386499-107387836	NONMMUG007893.2	-	-	-	lncRNA	1.17664	0.36541	0.34751	1.71872	2.81882	1.74614
MERGE.12124.1	1.59084	0.0472033	0.730234	up	12:-:34745922-34747259	MERGE.12124	12:-:34745922-34747259	-	-	-	-	-	-	2.65299	0.66587	1.23855	0.32596	0.29834	0.9467
NONMMUT020739.2	-1.0590608621895	0.0477645	0.730234	down	14:+:51072991-51075985	NONMMUG012903.2	14:+:51072991-51075985	14:+:51072991-51075985	NONMMUG012903.2	-	-	-	lncRNA	0.74892	0.8679	0.51188	1.08212	1.60808	2.23447
NONMMUT076006.1	1.29595	0.049511	0.730234	up	1:+:93195170-93196054	NONMMUG047159.1	1:+:93195170-93196054	1:+:93195170-93196054	NONMMUG047159.1	-	-	-	lncRNA	0.7552	0.49107	0.43108	0.1344	0.27996	0.28626
NONMMUT034656.2	-1.11351162003503	0.047238	0.730234	down	19:+:38671016-38673224	MERGE.30268	19:+:38671016-38673224	19:+:38671016-38673224	NONMMUG021311.2	-	-	-	lncRNA	1.52624	0.59022	0.67463	1.26839	2.12486	2.86711
MERGE.63748.1	-4.92899632645761	0.00142702	0.237566	down	X:+:127193378-127193610	MERGE.63748	X:+:127193378-127193610	-	-	-	-	-	-	0.25497	0	0	1.70168	1.89046	2.29539
MERGE.7079.1	-5.30810884711087	0.00163158	0.255373	down	10:-:122350587-122350931	MERGE.7079	10:-:122350587-122350931	-	-	-	-	-	-	0.1722	0	0	1.76219	1.07725	2.69248
NONMMUT150713.1	4.10901	0.0269928	0.713222	up	6:-:129216351-129237991	MERGE.50594	6:-:129203248-129238725	6:-:129216351-129237991	NONMMUG036710.3	-	-	-	lncRNA	0.61518	0.6429	0.70545	0.74293	0	0
NONMMUT019388.2	-1.29471034719018	0.00188947	0.279927	down	13:+:113871762-113876144	MERGE.16998	13:+:113871762-113876144	13:+:113871762-113876144	NONMMUG012020.2	-	-	-	lncRNA	1.33511	0.79077	0.83779	2.52086	2.4339	2.6267
NONMMUT115232.1	-1.84137432250072	0.00973447	0.556654	down	4:+:85865243-85865992	MERGE.41295	4:+:85865243-85865992	4:+:85865243-85865992	NONMMUG072263.1	-	-	-	lncRNA	0.47527	0.26076	0.28613	0.82823	1.43155	1.59509
NONMMUT114392.1	-1.20852254188918	0.0475335	0.730234	down	3:-:149268872-149269689	MERGE.39558	3:-:149268872-149269689	3:-:149268872-149269689	NONMMUG071746.1	-	-	-	lncRNA	2.06988	0.57114	0.81619	1.66417	2.59143	3.13145
MERGE.39.1	-1.71879821259018	0.00240953	0.308141	down	1:+:6374063-6377234	MERGE.39	1:+:6374063-6377234	-	-	-	-	-	-	0.88027	0.32883	0.54875	1.82913	1.63599	2.32945
NONMMUT067032.2	-1.21585289139354	0.0480129	0.730234	down	8:+:106974833-106976150	MERGE.57708	8:+:106974833-106976150	8:+:106974833-106976150	NONMMUG041500.2	-	-	-	lncRNA	0.45075	0.40393	0.3166	1.21334	1.34725	0.51257
NONMMUT035333.2	-1.00809376505772	0.0302784	0.730234	down	19:+:60944759-60945943	MERGE.30947	19:+:60944759-60945943	19:+:60944759-60945943	NONMMUG021773.2	-	-	-	lncRNA	3.2086	1.60454	1.29785	3.41284	4.21658	4.7152
NONMMUT101331.1	-1.3078838411834	0.0342929	0.730234	down	17:+:66243412-66244754	NONMMUG063399.1	17:+:66243412-66244754	17:+:66243412-66244754	NONMMUG063399.1	-	-	-	lncRNA	0.4866	0.1618	0.31958	1.06282	0.73795	0.51351
NONMMUT045655.2	-1.05655885273542	0.0413958	0.730234	down	3:+:145804262-145807269	MERGE.39448	3:+:145804262-145807269	3:+:145804262-145807269	NONMMUG028181.2	-	-	-	lncRNA	0.47401	0.24201	0.2061	0.58437	0.49422	0.87965
MERGE.30816.1	-1.00588635516833	0.0384574	0.730234	down	19:-:57273033-57273920	MERGE.30816	19:-:57273033-57273920	-	-	-	-	-	-	1.58893	1.12565	0.67129	2.61947	2.29415	1.93364
MERGE.11031.7	6.82588	0.0251099	0.702508	up	11:-:115415691-115420087	MERGE.11031	11:-:115415681-115420097	-	-	-	-	-	-	1.45494	0.34021	2.86666	0.31513	0	0
MERGE.10029.11	-9.52010914626221	3.8288e-05	0.0299523	down	11:-:88672289-88718101	MERGE.10029	11:-:88339382-88718513	-	-	-	-	-	-	0	0	0	1.70134	0.52706	1.76219
MERGE.62279.1	-1.62033160830847	0.0089843	0.540509	down	JH584304.1:+:63155-64054	MERGE.62279	JH584304.1:+:63155-64054	-	-	-	-	-	-	1.69976	0.88127	0.55637	3.77402	2.37062	3.17455
NONMMUT129201.1	1.89	0.0443754	0.730234	up	8:+:92388066-92388973	NONMMUG081120.1	8:+:92387257-92389344	8:+:92388066-92388973	NONMMUG081120.1	-	-	-	lncRNA	0.76879	0.5265	0.32825	0.37844	0.0758	0.0775
MERGE.1844.3	6.88432	0.00482788	0.416331	up	1:-:93151583-93160870	MERGE.1844	1:-:93148654-93161448	-	-	-	-	-	-	0.07073	1.46936	0.31792	0	0	0
MERGE.33539.2	-4.86944890383901	0.0178166	0.65067	down	2:-:104427049-104494511	MERGE.33539	2:-:104426481-104504131	-	-	-	-	-	-	0.76183	0.00856	1.11443	7.02892	7.22463	3.83443
NONMMUT031541.2	-1.38681962109494	0.00645268	0.472187	down	18:-:13900536-13903470	MERGE.27372	18:-:13900536-13903470	18:-:13900536-13903470	NONMMUG019381.2	-	-	-	lncRNA	1.24992	0.46644	0.58494	1.75618	2.06825	2.08118
MERGE.11022.1	-4.62545229121558	0.0179041	0.65187	down	11:-:115182597-115187351	MERGE.11022	11:-:115182597-115187859	-	-	-	-	-	-	0.9454	0	0.03036	0.93381	1.34933	0.87797
NONMMUT136777.1	-1.04774464503706	0.032908	0.730234	down	X:-:17527769-17529489	MERGE.62546	X:-:17527769-17529489	X:-:17527769-17529489	NONMMUG086399.1	-	-	-	lncRNA	0.74218	0.32197	0.33252	1.16728	0.79982	0.85869
NONMMUT060122.2	-1.14337009230673	0.0414538	0.730234	down	7:-:18993553-19001222	MERGE.51460	7:-:18993234-19001222	7:-:18993553-19001222	NONMMUG037352.3	-	-	-	lncRNA	0.50392	0.42684	0.31934	0.99123	0.83573	1.00531
NONMMUT018954.2	-1.09635359346895	0.0276142	0.715612	down	13:-:102850476-102851194	MERGE.16742	13:-:102850476-102851194	13:-:102850476-102851194	NONMMUG011793.2	-	-	-	lncRNA	1.28073	0.57423	1.16071	2.07713	2.62279	1.78131
MERGE.2387.1	-1.30137646363803	0.0299982	0.730234	down	1:-:127667686-127668415	MERGE.2387	1:-:127667686-127668415	-	-	-	-	-	-	2.27871	0.71441	0.94724	4.2727	2.11187	2.89199
MERGE.18928.1	-1.16549778575322	0.0359166	0.730234	down	14:+:62923869-62924622	MERGE.18928	14:+:62923869-62924622	-	-	-	-	-	-	1.51675	0.89341	0.77478	1.56003	2.93919	3.07993
MERGE.2862.1	2.22498	0.0363947	0.730234	up	1:-:150361305-150392937	MERGE.2862	1:-:150361305-150393080	-	-	-	-	-	-	2.04627	8.41581	9.54311	2.16284	0.53866	1.61591
MERGE.27826.1	-3.49979707995897	0.026581	0.710882	down	18:-:36110648-36111164	MERGE.27826	18:-:36110648-36111164	-	-	-	-	-	-	0.34473	0	0.41508	1.02255	1.22473	1.63339
MERGE.64217.1	-1.23169002219926	0.0410419	0.730234	down	X:+:159734118-159734640	MERGE.64217	X:+:159734118-159734640	-	-	-	-	-	-	1.6471	0.60246	0.59269	1.6173	1.89497	2.7449
MERGE.51632.3	1.60401	0.0447877	0.730234	up	7:-:25461710-25520224	MERGE.51632	7:-:25461707-25539873	-	-	-	-	-	-	2.92264	6.70263	14.1291	2.0742	2.28768	2.48637
NONMMUT123122.1	-1.36146296654324	0.0439706	0.730234	down	6:+:134809915-134811366	MERGE.50705	6:+:134809915-134811366	6:+:134809915-134811366	NONMMUG077226.1	-	-	-	lncRNA	0.30687	0.434	0.13958	0.66446	0.91955	0.63005
MERGE.34754.1	1.22371	0.0146565	0.625208	up	2:-:148419769-148421489	MERGE.34754	2:-:148419769-148421489	-	-	-	-	-	-	2.83928	2.26012	1.4132	1.22872	0.8798	0.80144
MERGE.20839.3	4.44711	0.000412774	0.126103	up	15:-:55015192-55064971	MERGE.20839	15:-:55015131-55072152	-	-	-	-	-	-	7.08658	6.43212	9.5572	0.21896	1.21017	0.17721
MERGE.20839.1	-1.160470522489	0.0148804	0.625932	down	15:-:55015131-55072148	MERGE.20839	15:-:55015131-55072152	-	-	-	-	-	-	2.27356	3.24052	1.41092	4.93141	5.14465	5.31301
NONMMUT091612.1	-1.9901878938865	0.0455865	0.730234	down	13:-:62736139-62737709	MERGE.15729	13:-:62734907-62737709	13:-:62736139-62737709	NONMMUG011211.2	-	-	-	lncRNA	0.38762	0.02766	0.19731	0.64778	0.552	0.37627
MERGE.44509.1	-1.09973769406515	0.0272019	0.714183	down	5:+:38105615-38106026	MERGE.44509	5:+:38105615-38106026	-	-	-	-	-	-	1.58617	1.95148	1.90986	3.46449	3.94237	5.46576
MERGE.45462.1	-1.072942839621	0.0324277	0.730234	down	5:-:97949833-97950363	MERGE.45462	5:-:97949833-97950363	-	-	-	-	-	-	6.43319	3.15105	3.86179	7.16822	8.55445	15.055
NONMMUT133080.1	-4.5049868957884	0.0122585	0.593636	down	9:+:89437614-89499672	NONMMUG083794.1	9:+:89437614-89499672	9:+:89437614-89499672	NONMMUG083794.1	-	-	-	lncRNA	0	0.10947	0	0.63252	0.17336	0.77994
MERGE.43110.1	-1.86000453912999	0.0299855	0.730234	down	4:+:146517528-146517765	MERGE.43110	4:+:146517528-146517765	-	-	-	-	-	-	0.24962	0.27391	0.50093	1.33275	0.92537	1.77408
MERGE.50579.6	3.96094	0.0140647	0.616561	up	6:-:128410258-128424918	MERGE.50579	6:-:128409444-128424931	-	-	-	-	-	-	0.68199	0.43654	0.76034	0.118	0	0.12566
MERGE.5057.1	-1.54736956651985	0.00819332	0.522948	down	10:+:40410916-40411644	MERGE.5057	10:+:40410916-40411644	-	-	-	-	-	-	2.50594	0.93895	0.91583	3.71655	3.49315	4.8459
MERGE.53745.4	-4.22109647427693	0.0231498	0.692607	down	7:-:104299894-104346792	MERGE.53745	7:-:104299464-104353368	-	-	-	-	-	-	0.0613	0.62141	0.00703	1.19228	1.2093	1.17839
NONMMUT019667.2	1.4533	0.0206246	0.672619	up	14:+:12321379-12324473	MERGE.17194	14:+:12283976-12324473	14:+:12321379-12324473	NONMMUG012213.2	-	-	-	lncRNA	0.87338	0.46339	0.40447	0.14092	0.3558	0.1819
NONMMUT011664.2	-1.25423596754883	0.0375409	0.730234	down	11:-:95823957-95824411	MERGE.10209	11:-:95823957-95824411	11:-:95823957-95824411	NONMMUG007383.2	-	-	-	lncRNA	0.65285	0.28655	0.52405	0.95855	1.30086	1.14451
MERGE.26761.4	2.58618	0.00540239	0.435828	up	17:-:79335356-79355011	MERGE.26761	17:-:79333513-79356366	-	-	-	-	-	-	1.2762	1.03016	1.05975	0.41118	0.18353	0.0834
MERGE.41598.1	-3.89236316288908	0.000425518	0.128112	down	4:-:101871624-101872053	MERGE.41598	4:-:101871624-101872053	-	-	-	-	-	-	0.27632	0.60642	0.8595	10.819	6.30624	10.2121
MERGE.27399.1	-1.20223682023724	0.0220243	0.684364	down	18:-:15023540-15025267	MERGE.27399	18:-:15023540-15025267	-	-	-	-	-	-	0.76496	0.64134	0.45536	1.62146	1.03555	2.01993
NONMMUT141907.1	-5.86661875997177	0.0101642	0.565302	down	12:-:69369484-69372035	MERGE.12571	12:-:69369484-69372458	12:-:69369484-69372035	NONMMUG089439.1	-	-	-	lncRNA	0.51797	0	0	0.76647	0.66343	1.03682
NONMMUT119091.1	-1.03574013278244	0.00926095	0.543998	down	5:+:108864833-108868354	MERGE.45807	5:+:108864833-108868354	5:+:108864833-108868354	NONMMUG074723.1	-	-	-	lncRNA	1.18498	0.83601	0.73117	2.34158	1.82906	1.81424
NONMMUT005020.2	2.0801	0.0138097	0.614736	up	10:-:23781257-23782603	MERGE.4770	10:-:23781257-23788379	10:-:23781257-23782603	NONMMUG003220.2	-	-	-	lncRNA	0.4631	0.82274	0.57531	0.24529	0.12263	0.10449
NONMMUT016947.2	-5.61608885604613	4.68563e-05	0.03351	down	13:+:33954619-33960177	MERGE.14892	13:+:33935567-33960181	13:+:33954619-33960177	NONMMUG010650.2	-	-	-	lncRNA	0	0	0	0.39417	0.77277	0.56791
MERGE.62278.24	10.6932	2.15842e-07	0.00344305	up	JH584304.1:-:53171-61481	MERGE.62278	JH584304.1:-:20051-61956	-	-	-	-	-	-	3.49518	3.20424	2.78052	0	0	0
MERGE.48276.1	2.31978	0.0227007	0.689264	up	6:-:40550209-40550432	MERGE.48276	6:-:40550209-40550432	-	-	-	-	-	-	4.90656	1.35812	1.49027	0.35401	0.3687	0.50266
NONMMUT115264.1	-1.80626996555639	0.0065077	0.473384	down	4:+:86004105-86005630	MERGE.41330	4:+:86004105-86005630	4:+:86004105-86005630	NONMMUG072294.1	-	-	-	lncRNA	0.23359	0.11392	0.1875	0.71019	0.46905	0.73784
MERGE.2382.1	-1.4423196628778	0.00195775	0.281773	down	1:-:127620425-127629780	MERGE.2382	1:-:127620425-127629780	-	-	-	-	-	-	1.31442	0.74322	1.20164	3.66573	2.55112	3.01464
NONMMUT019335.2	3.34662	0.0387218	0.730234	up	13:+:112660782-112672772	MERGE.16873	13:+:112660751-112738749	13:+:112660782-112672772	NONMMUG011984.2	-	-	-	lncRNA	1.79207	2.01832	1.6455	0.01147	1.91179	0.17104
NONMMUT057906.2	5.0614	0.0419805	0.730234	up	6:+:88919708-88922637	MERGE.49514	6:+:88919708-88923625	6:+:88919708-88922637	NONMMUG035961.2	-	-	-	lncRNA	1.1456	0.37824	0.39876	0	0	1.13363
NONMMUT108832.1	7.4937	0.0132278	0.606853	up	2:-:23492820-23496388	MERGE.31503	2:-:23492820-23496388	2:-:23492820-23496388	NONMMUG022220.2	-	-	-	lncRNA	5.86757	2.14008	3.2816	0	2.51043	0
MERGE.50685.5	-6.75840942019021	0.0041333	0.391484	down	6:-:134446488-134566912	MERGE.50685	6:-:134446476-134566965	-	-	-	-	-	-	1.35995	0.00537	0.01768	5.76941	4.3374	6.06831
MERGE.50685.2	4.66389	0.00535942	0.435052	up	6:-:134446488-134566868	MERGE.50685	6:-:134446476-134566965	-	-	-	-	-	-	5.13153	6.66354	16.8174	1.97735	0.2954	0.06155
MERGE.23966.1	1.33563	0.0271171	0.714183	up	16:-:78330005-78331512	MERGE.23966	16:-:78330005-78331512	-	-	-	-	-	-	2.48195	0.71329	1.17798	0.63102	0.53855	0.42932
NONMMUT148993.1	1.2753	0.00765564	0.506852	up	5:+:73684016-73684498	MERGE.45089	5:+:73684016-73684498	5:+:73684016-73684498	NONMMUG093700.1	-	-	-	lncRNA	3.22876	2.69938	3.20886	1.34079	1.16845	1.48611
NONMMUT068549.2	1.48288	0.0468706	0.730234	up	9:+:34700831-34703930	MERGE.59486	9:+:34700831-34703930	9:+:34700831-34703930	NONMMUG042436.2	-	-	-	lncRNA	0.97259	0.27688	0.38459	0.11937	0.13765	0.32689
NONMMUT028373.2	1.4016	0.0219661	0.683589	up	17:+:15499918-15501482	MERGE.24777	17:+:15499888-15528432	17:+:15499918-15501482	NONMMUG017560.2	-	-	-	lncRNA	6.66218	2.04804	2.33872	1.61299	1.23136	1.0522
NONMMUT031491.2	-1.19143214088226	0.0146161	0.624453	down	18:+:11729054-11730693	MERGE.27312	18:+:11729054-11730693	18:+:11729054-11730693	NONMMUG019352.2	-	-	-	lncRNA	0.63394	0.38425	0.35621	0.87035	1.1163	1.27012
MERGE.50430.1	1.2255	0.0112337	0.579911	up	6:+:127790374-127795951	MERGE.50430	6:+:127790374-127795951	-	-	-	-	-	-	2.5797	1.56009	1.18432	0.94289	0.67126	0.72448
MERGE.2335.1	-1.52603996517342	0.0187331	0.657955	down	1:+:127255380-127256214	MERGE.2335	1:+:127255380-127256214	-	-	-	-	-	-	2.06331	0.46843	1.02802	3.89369	2.47273	2.7643
MERGE.50518.1	1.83067	0.011395	0.581247	up	6:+:127829250-127830754	MERGE.50518	6:+:127829250-127830754	-	-	-	-	-	-	3.29612	0.88075	1.50512	0.5269	0.62193	0.33666
NONMMUT021161.2	-1.7380715903196	0.0276112	0.715612	down	14:-:61602836-61682373	MERGE.18871	14:-:61602836-61682768	14:-:61602836-61682373	NONMMUG013142.3	-	-	-	lncRNA	0.11398	0.10262	0.23225	0.31988	0.52004	0.78929
MERGE.23376.1	-1.0711249567616	0.0152892	0.629435	down	16:+:35803444-35807734	MERGE.23376	16:+:35803444-35807734	-	-	-	-	-	-	2.11483	0.96977	1.60592	2.75046	3.16294	4.35908
MERGE.16419.1	-1.04205035812358	0.0223459	0.686814	down	13:-:92116562-92126235	MERGE.16419	13:-:92116562-92126235	-	-	-	-	-	-	1.99279	0.85132	0.80845	2.62033	2.35059	2.34378
MERGE.1372.4	2.40683	0.0482936	0.730234	up	1:-:75135771-75142638	MERGE.1372	1:-:75134554-75142711	-	-	-	-	-	-	5.32251	6.88246	4.63733	6.40596	0.47026	0.41071
MERGE.41353.1	-1.22499096050365	0.00978198	0.556915	down	4:-:87933764-87937135	MERGE.41353	4:-:87933764-87937135	-	-	-	-	-	-	3.66022	1.38874	2.14259	4.75038	5.34348	6.65735
NONMMUT073969.2	6.87987	0.0200088	0.666724	up	X:-:136041239-136045867	MERGE.63821	X:-:136041239-136051331	X:-:136041239-136045867	NONMMUG045868.2	-	-	-	lncRNA	3.2143	2.07773	0.05561	0	0	0
MERGE.1787.1	-1.01593487335171	0.0239678	0.695855	down	1:+:91047733-91050780	MERGE.1787	1:+:91047733-91050780	-	-	-	-	-	-	1.5398	0.69154	0.91919	1.65205	2.26253	2.74283
NONMMUT128298.1	-1.59758133201704	0.0271257	0.714183	down	8:+:19704345-19707113	MERGE.55384	8:+:19700449-19707852	8:+:19704345-19707113	NONMMUG040020.2	-	-	-	lncRNA	0.41301	1.33409	1.01612	2.11921	3.01744	3.26317
NONMMUT138942.1	1.16411	0.0484436	0.730234	up	1:-:9542036-9545478	MERGE.128	1:-:9498689-9545973	1:-:9542036-9545478	NONMMUG047952.2	-	-	-	lncRNA	1.70394	0.62482	0.67869	0.36467	0.31983	0.67858
NONMMUT079531.1	2.89913	0.00906048	0.541754	up	1:-:187025330-187026448	MERGE.3895	1:-:187024977-187026448	1:-:187025330-187026448	NONMMUG049480.1	-	-	-	lncRNA	0.98219	0.56315	0.31963	0.09449	0.0492	0.07547
NONMMUT070498.2	2.9375	0.0438905	0.730234	up	9:-:95618911-95648471	MERGE.61204	9:-:95618911-95648471	9:-:95618911-95648471	NONMMUG043634.2	-	-	-	lncRNA	1.10951	0.40582	0.62748	0.22439	0.2337	0
MERGE.64221.1	-1.31642325309677	0.0138634	0.61557	down	X:+:159781941-159782634	MERGE.64221	X:+:159781941-159782634	-	-	-	-	-	-	1.09145	0.43836	0.70433	2.20908	1.6859	1.58184
NONMMUT056008.2	-1.05343353897626	0.0119548	0.58999	down	6:+:28563490-28565361	MERGE.47786	6:+:28563490-28565361	6:+:28563490-28565361	NONMMUG034790.2	-	-	-	lncRNA	2.89588	1.41036	1.45206	4.116	3.72064	4.33057
MERGE.50635.1	-6.62253279478248	0.0466129	0.730234	down	6:-:129483751-129507239	MERGE.50635	6:-:129483751-129507239	-	-	-	-	-	-	0	0.21291	0	0.46512	0.35231	3.72333
NONMMUT091617.1	-6.20001063002554	3.77562e-05	0.0296604	down	13:-:62747468-62748216	MERGE.15733	13:-:62747468-62748441	13:-:62747468-62748216	NONMMUG057070.1	-	-	-	lncRNA	0	0	0	0.61759	0.44106	0.99591
MERGE.11551.1	-2.08646420134259	0.011784	0.587548	down	12:+:8523361-8525048	MERGE.11551	12:+:8523361-8525048	-	-	-	-	-	-	0.56312	0.21884	0.21189	0.87692	1.04378	2.48469
NONMMUT068625.2	-1.24477279668802	0.0211495	0.676607	down	9:-:37138553-37139624	MERGE.59555	9:-:37138553-37139624	9:-:37138553-37139624	NONMMUG042486.2	-	-	-	lncRNA	2.03665	0.75001	0.7785	2.1452	2.74784	3.17723
NONMMUT105813.1	5.1608	0.0215027	0.679548	up	19:-:5364633-5366876	MERGE.29199	19:-:5364633-5366876	19:-:5364633-5366876	NONMMUG066137.1	-	-	-	lncRNA	5.8164	3.60432	5.46848	4.70092	0.06594	0
NONMMUT008077.2	4.2349	0.000505162	0.142456	up	10:+:127290797-127292445	MERGE.7260	10:+:127290774-127296288	10:+:127290797-127292445	NONMMUG004995.2	-	-	-	lncRNA	0.7926	0.54687	0.78806	0.04809	0.05008	0.01707
MERGE.35323.1	-1.70047741590268	0.00263594	0.322324	down	2:+:163728745-163730020	MERGE.35323	2:+:163728745-163730020	-	-	-	-	-	-	0.82642	0.44277	0.67272	1.6883	2.34089	2.60309
MERGE.10376.1	-1.08668578623182	0.0163394	0.638915	down	11:-:98477964-98479471	MERGE.10376	11:-:98477964-98479471	-	-	-	-	-	-	1.67433	0.97987	2.11879	3.69849	3.03046	3.76125
NONMMUT019033.2	-5.62668443200904	0.000264506	0.0969682	down	13:-:104947434-104949323	MERGE.16796	13:-:104945904-105054930	13:-:104947434-104949323	NONMMUG011856.2	-	-	-	lncRNA	0.02358	0.02299	0.04416	1.15381	1.98826	2.19679
NONMMUT108130.1	3.54007	0.0151676	0.628516	up	2:+:151523285-151523937	MERGE.34864	2:+:151523285-151523937	2:+:151523285-151523937	NONMMUG067615.1	-	-	-	lncRNA	0.93253	0.31613	0.58424	0.06072	0	0.12932
MERGE.57772.5	5.47135	0.0126664	0.601523	up	8:-:109671331-109693247	MERGE.57772	8:-:109662918-109693260	-	-	-	-	-	-	1.84737	1.06274	1.33994	0.64948	0	0.02978
MERGE.62878.5	-1.44976617274741	0.0436629	0.730234	down	X:-:57231491-57326599	MERGE.62878	X:-:57231485-57393036	-	-	-	-	-	-	6.00733	1.20968	5.83722	10.0406	11.9774	8.37531
MERGE.8833.1	1.14695	0.0218774	0.682751	up	11:-:61363665-61364968	MERGE.8833	11:-:61363665-61364968	-	-	-	-	-	-	2.39186	0.99985	1.60912	0.93245	0.80225	0.55045
MERGE.56570.4	-3.33548692929759	0.000209706	0.0832443	down	8:-:70294188-70302463	MERGE.56570	8:-:70292866-70302489	-	-	-	-	-	-	0.25102	0.15303	0.14777	1.67532	1.58975	2.66421
NONMMUT065118.2	1.07358	0.036704	0.730234	up	8:-:31845100-31849034	MERGE.55752	8:-:31814551-32884029	8:-:31845100-31849034	NONMMUG040237.2	-	-	-	lncRNA	1.4607	0.84766	1.20888	0.39297	0.53171	0.97286
MERGE.40470.1	-1.0851874918702	0.0196816	0.663933	down	4:+:42202979-42203666	MERGE.40470	4:+:42202979-42203666	-	-	-	-	-	-	3.15179	1.35812	1.35164	4.39906	3.92139	3.80498
NONMMUT002397.2	1.1308	0.0256717	0.705882	up	1:+:121328092-121331149	MERGE.2170	1:+:121328092-121331149	1:+:121328092-121331149	NONMMUG001610.2	-	-	-	lncRNA	0.74796	0.4761	0.42885	0.39329	0.22506	0.1887
NONMMUT028509.2	-2.60227934653093	0.0280387	0.718721	down	17:+:21740499-21742366	MERGE.24937	17:+:21527963-21770091	17:+:21740499-21742366	NONMMUG017648.2	-	-	-	lncRNA	0.04771	0.18612	0.08935	0.9976	0.27264	1.00962
NONMMUT122572.1	-1.41821522271328	0.00674392	0.478698	down	6:+:86500532-86501285	MERGE.49353	6:+:86494649-86501285	6:+:86500532-86501285	NONMMUG094322.1	-	-	-	lncRNA	0.9849	0.63403	0.64829	2.75196	1.82558	1.82929
MERGE.6412.1	3.91255	0.0157772	0.634371	up	10:-:89845344-89845631	MERGE.6412	10:-:89845344-89845631	-	-	-	-	-	-	0.92827	0.90542	1.0763	0	0.57354	0
MERGE.5833.4	4.3147	0.0338899	0.730234	up	10:-:75506825-75517260	MERGE.5833	10:-:75351111-75517972	-	-	-	-	-	-	0.82212	0.81903	0.57744	0.02406	0.89727	0
NONMMUT111246.1	1.25481	0.00603619	0.458768	up	3:+:64031952-64035345	MERGE.37180	3:+:64031952-64035345	3:+:64031952-64035345	NONMMUG069597.1	-	-	-	lncRNA	0.87083	0.54421	0.54447	0.31931	0.26362	0.2654
NONMMUT021963.2	-1.44094262793436	0.00206094	0.286683	down	14:-:98141085-98142658	MERGE.19490	14:-:98140641-98143170	14:-:98141085-98142658	NONMMUG013641.2	-	-	-	lncRNA	4.35	2.62996	2.15871	8.55623	8.74516	8.06547
MERGE.62936.7	3.56373	0.0357526	0.730234	up	X:-:70461054-70477172	MERGE.62936	X:-:70459420-70477180	-	-	-	-	-	-	1.46812	1.07399	0.94965	0.32978	0	0.48625
MERGE.46116.3	3.91783	0.0134918	0.609715	up	5:-:115145462-115157650	MERGE.46116	5:-:115142981-115158179	-	-	-	-	-	-	0.55063	2.76559	2.90118	0.10852	0.0411	0.33269
MERGE.15315.1	-1.44266208387413	0.0307121	0.730234	down	13:-:49570292-49571085	MERGE.15315	13:-:49570292-49571085	-	-	-	-	-	-	0.3367	0.31473	0.18018	0.56594	0.90148	0.90402
MERGE.180.1	-1.04564842969017	0.0132615	0.606853	down	1:+:10117427-10119004	MERGE.180	1:+:10117427-10119004	-	-	-	-	-	-	2.67304	1.44591	1.39772	3.66843	3.50664	4.65577
NONMMUT081242.1	-2.30037892665621	0.0102432	0.565749	down	10:+:127184060-127187674	MERGE.7212	10:+:127184060-127187674	10:+:127184060-127187674	NONMMUG050505.1	-	-	-	lncRNA	0.19698	0.61962	0.23718	2.08588	2.09942	1.10131
NONMMUT038418.2	-1.55328236742169	0.00191585	0.281773	down	2:+:90918043-90920491	MERGE.33246	2:+:90918043-90920491	2:+:90918043-90920491	NONMMUG023743.2	-	-	-	lncRNA	0.75808	0.34605	0.50629	1.65677	1.6075	1.5172
NONMMUT014082.2	-1.62198466809537	0.0148911	0.625932	down	12:+:44598994-44600031	MERGE.12294	12:+:44328885-44604032	12:+:44598994-44600031	NONMMUG008912.2	-	-	-	lncRNA	4.66459	4.8882	1.49314	9.75314	11.9481	10.4269
MERGE.26487.1	-6.09703200064003	0.00510249	0.424948	down	17:-:65922735-65951185	MERGE.26487	17:-:65922735-65951187	-	-	-	-	-	-	0.6462	0.14487	0.25657	47.7738	51.5724	3.34821
MERGE.42345.4	3.09068	0.0232511	0.692731	up	4:-:128932048-128962423	MERGE.42345	4:-:128930233-128962442	-	-	-	-	-	-	3.05216	2.37792	2.0284	2.1811	0.07572	0.14932
MERGE.27402.1	-1.20935207971842	0.00576839	0.451066	down	18:-:15040895-15042669	MERGE.27402	18:-:15040895-15042669	-	-	-	-	-	-	1.10451	0.69781	0.77914	1.89125	1.91545	2.56113
MERGE.33704.1	-1.74747305617189	0.000942925	0.20334	down	2:+:112546402-112547750	MERGE.33704	2:+:112546402-112547750	-	-	-	-	-	-	0.73766	0.69265	0.61864	2.7922	2.4285	2.21183
MERGE.60342.3	-5.57810805968981	0.00657494	0.475344	down	9:-:61917276-61946760	MERGE.60342	9:-:61915905-61946774	-	-	-	-	-	-	0.26199	0.00348	0	0.54256	0.53417	0.86215
NONMMUT067315.2	-1.07582576562579	0.0335375	0.730234	down	8:-:115573681-115575241	MERGE.58255	8:-:115573681-115575241	8:-:115573681-115575241	NONMMUG041681.2	-	-	-	lncRNA	0.35204	0.22969	0.17566	0.508	0.5379	0.55901
NONMMUT072210.2	-1.09324008530394	0.00185111	0.27748	down	X:+:41656753-41659232	MERGE.62726	X:+:41400854-41678601	X:+:41656753-41659232	NONMMUG044758.2	-	-	-	lncRNA	7.09676	5.41498	5.66782	12.4277	13.2653	14.7724
MERGE.45286.1	-1.0221563761902	0.0171009	0.645614	down	5:+:88587986-88591668	MERGE.45286	5:+:88587986-88591668	-	-	-	-	-	-	1.66146	0.81421	0.76395	2.29304	1.9584	2.41132
NONMMUT000053.2	-3.08428000860433	0.00224259	0.300023	down	1:-:6164173-6167111	NONMMUG000039.2	1:-:6164173-6167111	1:-:6164173-6167111	NONMMUG000039.2	-	-	-	lncRNA	0.11769	0.10331	0.03779	0.63883	0.89439	0.61338
MERGE.10526.1	1.51152	0.0131233	0.604826	up	11:-:102010703-102011636	MERGE.10526	11:-:102010703-102011636	-	-	-	-	-	-	3.94365	1.46573	1.96575	1.24523	0.67793	0.66303
NONMMUT083406.1	1.1414	0.0391639	0.730234	up	11:+:30324457-30328571	NONMMUG051926.1	11:+:30317349-30333307	11:+:30324457-30328571	NONMMUG051926.1	-	-	-	lncRNA	0.69299	0.26667	0.60842	0.22482	0.18063	0.30782
NONMMUT135536.1	-1.69196667513007	0.0109272	0.577124	down	9:-:117901941-117903020	MERGE.61937	9:-:117901941-117903020	9:-:117901941-117903020	NONMMUG085466.1	-	-	-	lncRNA	0.30255	0.17102	0.16559	0.88109	0.73923	0.48218
NONMMUT023873.2	1.84112	0.0370002	0.730234	up	15:+:73091364-73092985	MERGE.21142	15:+:73090392-73097554	15:+:73091364-73092985	NONMMUG014747.2	-	-	-	lncRNA	0.98381	0.39467	0.53497	0.43772	0.10294	0.09022
MERGE.10402.3	-4.69684826074899	0.0329819	0.730234	down	11:-:98993071-98995370	MERGE.10402	11:-:98992943-99024189	-	-	-	-	-	-	0.0125	0.57617	0.01004	0.534	2.01607	1.88369
NONMMUT122908.1	-2.06328226161614	0.00924806	0.543998	down	6:+:117948021-117949177	NONMMUG077094.1	6:+:117945869-117949177	6:+:117948021-117949177	NONMMUG077094.1	-	-	-	lncRNA	0.11553	0.21599	0.17517	0.60542	0.67813	1.05831
MERGE.52305.2	8.10944	0.0143199	0.621626	up	7:-:44894335-44929462	MERGE.52305	7:-:44894305-44929496	-	-	-	-	-	-	8.19564	11.0275	9.89592	0.00143	0.00149	9.30865
MERGE.11824.1	-3.13172526109596	0.00907062	0.541823	down	12:+:21549042-21549302	MERGE.11824	12:+:21549042-21549302	-	-	-	-	-	-	0.34143	0.20814	0.09136	2.0255	1.05478	2.15699
NONMMUT052904.2	-1.22598215897056	0.0216767	0.680697	down	5:+:81041226-81042149	MERGE.45258	5:+:81041226-81042149	5:+:81041226-81042149	NONMMUG032850.2	-	-	-	lncRNA	3.31122	0.94069	1.3935	4.19091	3.87324	4.0517
NONMMUT084772.1	-1.2135629752536	0.0108403	0.575802	down	11:-:5554704-5555574	MERGE.7505	11:-:5554704-5557753	11:-:5554704-5555574	NONMMUG005207.2	-	-	-	lncRNA	3.18872	1.99587	3.13452	5.40188	9.51373	6.14036
MERGE.11697.1	-5.78719738748389	7.71345e-05	0.0447876	down	12:+:18338156-18338373	MERGE.11697	12:+:18338156-18338373	-	-	-	-	-	-	0	0	0	0.97001	1.89425	2.45333
NONMMUT012392.2	4.58885	0.00996582	0.560891	up	11:-:106768204-106779515	NONMMUG007852.2	11:-:106768204-106779515	11:-:106768204-106779515	NONMMUG007852.2	-	-	-	lncRNA	0.45699	0.88895	0.8754	0.0647	0	0.08858
MERGE.58357.4	-12.5939460173687	8.70664e-06	0.0118821	down	8:-:125418074-125570538	MERGE.58357	8:-:125418063-125570538	-	-	-	-	-	-	0	0	0	10.3522	3.34624	7.04357
MERGE.56394.1	-1.84189576378024	0.014725	0.625329	down	8:-:64171700-64172437	MERGE.56394	8:-:64171700-64172437	-	-	-	-	-	-	1.00625	0.29444	0.38771	1.14614	2.08898	2.42201
NONMMUT119744.1	1.97557	0.00864132	0.530763	up	5:+:145269256-145272873	MERGE.47231	5:+:145231715-145295008	5:+:145269256-145272873	NONMMUG075093.1	-	-	-	lncRNA	2.61496	0.70571	1.64761	0.26301	0.46796	0.50182
NONMMUT059503.2	1.91588	0.00266747	0.324101	up	6:+:146376417-146378186	MERGE.50918	6:+:146376417-146378186	6:+:146376417-146378186	NONMMUG036981.2	-	-	-	lncRNA	1.0405	1.12333	0.95647	0.29868	0.40439	0.19879
MERGE.28279.1	-1.13344375182423	0.0053907	0.435828	down	18:-:54909087-54916690	MERGE.28279	18:-:54909087-54916690	-	-	-	-	-	-	5.81864	3.00345	3.54811	8.11686	9.03298	10.0245
NONMMUT009120.2	2.65526	0.0404299	0.730234	up	11:-:30904948-30905907	MERGE.8081	11:-:30904948-30905907	11:-:30904948-30905907	NONMMUG005659.2	-	-	-	lncRNA	1.26863	0.29426	0.36015	0.01377	0.11471	0.17593
NONMMUT021956.2	-1.70916183870432	0.00401684	0.387522	down	14:-:97984978-97986994	MERGE.19476	14:-:97984978-97986994	14:-:97984978-97986994	NONMMUG013634.2	-	-	-	lncRNA	2.0618	0.8511	0.97529	2.97484	4.76345	5.30317
NONMMUT096910.1	2.58179	0.013495	0.609715	up	15:-:36762030-36762845	NONMMUG060565.1	15:-:36762030-36762845	15:-:36762030-36762845	NONMMUG060565.1	-	-	-	lncRNA	1.3651	0.46602	0.81819	0.12957	0.30364	0.05174
NONMMUT012491.2	-1.03672371378143	0.0212342	0.676911	down	11:-:108259000-108261202	MERGE.10849	11:-:108259000-108261202	11:-:108259000-108261202	NONMMUG007924.2	-	-	-	lncRNA	2.54168	1.11461	1.75883	2.92765	3.87391	4.79154
NONMMUT150974.1	-4.00199543973685	0.0226467	0.688608	down	7:+:45122387-45123177	MERGE.52331	7:+:45121833-45124144	7:+:45122387-45123177	NONMMUG094892.1	-	-	-	lncRNA	0.27832	0	0	1.23833	0.42209	0.3117
NONMMUT042446.2	1.14605	0.0140628	0.616561	up	3:+:32577258-32579668	MERGE.36632	3:+:32529465-32579668	3:+:32577258-32579668	NONMMUG026305.2	-	-	-	lncRNA	0.52978	0.48219	0.60822	0.26312	0.2455	0.26269
NONMMUT140947.1	1.03959	0.0252574	0.702516	up	11:-:68817915-68819135	MERGE.9066	11:-:68817915-68819135	11:-:68817915-68819135	NONMMUG088936.1	-	-	-	lncRNA	1.89759	0.85425	1.24006	0.63863	0.58622	0.71467
MERGE.46348.3	3.60707	0.0143828	0.622026	up	5:-:122453514-122501895	MERGE.46348	5:-:122453513-122502225	-	-	-	-	-	-	9.96153	13.5749	13.5482	5.88253	0.17085	1.10367
MERGE.21641.1	1.58574	0.00858151	0.530055	up	15:-:81908451-81908826	MERGE.21641	15:-:81908451-81908826	-	-	-	-	-	-	2.60705	2.13832	2.31467	0.703	0.65896	1.12295
MERGE.44796.1	-1.34983483695699	0.0303299	0.730234	down	5:+:57804223-57806676	MERGE.44796	5:+:57804223-57806676	-	-	-	-	-	-	0.60523	0.72168	0.36923	1.13099	1.2228	2.52352
MERGE.59552.1	-1.29264509139594	0.00706532	0.489744	down	9:-:37087644-37097204	MERGE.59552	9:-:37087644-37097204	-	-	-	-	-	-	2.27665	0.87111	1.11156	3.40667	3.38302	3.36868
NONMMUT086480.1	-2.10621560983141	0.00191435	0.281773	down	12:+:20201834-20205013	MERGE.11767	12:+:20201834-20205013	12:+:20201834-20205013	NONMMUG053855.1	-	-	-	lncRNA	0.15413	0.1435	0.10497	0.58185	0.4848	0.80994
MERGE.13959.9	-1.41459233007758	0.0110596	0.578932	down	12:-:111319039-111377619	MERGE.13959	12:-:111292976-111377718	-	-	-	-	-	-	1.46644	0.47977	0.60335	1.69836	2.36643	2.51041
MERGE.6289.4	-1.20197669264832	0.00325537	0.353044	down	10:-:84375296-84440565	MERGE.6289	10:-:84370903-84440597	-	-	-	-	-	-	2.26623	1.53001	2.30367	5.04155	5.51086	4.31513
MERGE.3645.1	-1.51008782263764	0.00580689	0.452374	down	1:+:178718702-178721230	MERGE.3645	1:+:178718702-178721230	-	-	-	-	-	-	0.39935	0.30932	0.47142	0.86228	1.46412	1.33008
MERGE.63044.9	1.85599	0.0221	0.685008	up	X:-:74369217-74373219	MERGE.63044	X:-:74365718-74373349	-	-	-	-	-	-	3.34037	6.13164	5.85928	1.35962	3.27353	0.67411
MERGE.454.1	-1.12381347687955	0.0387706	0.730234	down	1:-:33564745-33566064	MERGE.454	1:-:33564745-33566064	-	-	-	-	-	-	1.08017	0.64202	0.6232	1.10137	2.03345	2.44169
MERGE.21573.1	-1.28609637050024	0.0153866	0.630645	down	15:-:81244480-81245477	MERGE.21573	15:-:81244480-81245477	-	-	-	-	-	-	1.45844	0.54434	1.02736	2.54263	1.90336	2.89102
NONMMUT088282.1	3.41168	0.0374831	0.730234	up	12:-:34895340-34896751	MERGE.12164	12:-:34895340-34897801	12:-:34895340-34896751	NONMMUG055003.1	-	-	-	lncRNA	0.98875	0.39243	0.65859	0.234	0.20472	0
MERGE.20062.1	1.68143	0.00695659	0.485499	up	15:+:10728684-10729968	MERGE.20062	15:+:10728684-10729968	-	-	-	-	-	-	3.08604	1.30211	1.83703	0.82281	0.81411	0.38335
NONMMUT043766.2	-3.39199602333758	0.0383091	0.730234	down	3:+:88030883-88033114	MERGE.37739	3:+:88030867-88033350	3:+:88030883-88033114	NONMMUG027053.2	-	-	-	lncRNA	0.1027	0.25355	0	0.94811	0.4164	0.51091
MERGE.12917.4	3.8088	0.036365	0.730234	up	12:-:79232351-79296266	MERGE.12917	12:-:79232346-79296304	-	-	-	-	-	-	3.33192	2.7575	3.4784	0.03746	3.72898	0.09261
MERGE.32442.1	-1.41690469162777	0.00721638	0.494666	down	2:-:58472623-58472971	MERGE.32442	2:-:58472623-58472971	-	-	-	-	-	-	1.48948	1.18301	1.91301	3.86267	4.18074	4.91997
MERGE.39919.6	-2.02317103451366	0.0361176	0.730234	down	4:-:11276872-11322127	MERGE.39919	4:-:11261315-11322137	-	-	-	-	-	-	2.24199	0.24947	0.22132	1.72388	2.27285	2.3102
MERGE.2342.1	-1.01956195738476	0.0355148	0.730234	down	1:+:127321330-127322205	MERGE.2342	1:+:127321330-127322205	-	-	-	-	-	-	2.42452	1.37673	2.61307	3.34936	4.30545	6.37844
MERGE.63918.5	-6.63167244386649	0.0163846	0.638915	down	X:-:140539537-140599031	MERGE.63918	X:-:140539528-140600659	-	-	-	-	-	-	0	1.15145	0.0054	5.17163	2.78664	1.65093
MERGE.46432.8	2.83555	0.0304766	0.730234	up	5:-:123577818-123673983	MERGE.46432	5:-:123577795-123684618	-	-	-	-	-	-	2.56741	0.22211	1.94545	0.2133	0.19088	0.08749
NONMMUT024350.2	-1.23098680632819	0.0167287	0.642243	down	15:-:82002293-82005648	MERGE.21584	15:-:81992523-82033862	15:-:82002293-82005648	NONMMUG015050.2	-	-	-	lncRNA	0.61516	0.37555	0.99825	1.51225	1.62422	1.53493
MERGE.3210.3	5.47819	0.0308422	0.730234	up	1:-:163245122-163313668	MERGE.3210	1:-:163245119-163313710	-	-	-	-	-	-	0.43407	0.9101	1.36766	0	0.73964	0.01296
MERGE.2185.1	7.50729	0.00246032	0.31123	up	1:-:125389454-125435734	MERGE.2185	1:-:125389454-125435734	-	-	-	-	-	-	2.01833	2.33955	2.21106	0.00434	0	0.33263
MERGE.12529.1	-4.27358707907393	0.0413868	0.730234	down	12:+:64394871-64395432	MERGE.12529	12:+:64394871-64395432	-	-	-	-	-	-	0.26428	0	0.10607	0.37627	2.22883	2.45424
NONMMUT024490.2	-3.53513176884691	0.00721297	0.494666	down	15:+:85671655-85701064	MERGE.21814	15:+:85653460-85707524	15:+:85671655-85701064	NONMMUG015145.3	-	-	-	lncRNA	0.09436	0.11044	0.06817	0.5038	1.53915	1.95825
NONMMUT152022.1	1.00876	0.0185107	0.656587	up	8:+:20071659-20072362	MERGE.55406	8:+:20070113-20075241	8:+:20071659-20072362	NONMMUG095443.1	-	-	-	lncRNA	4.21805	2.73798	3.3382	1.8503	1.45908	2.083
MERGE.34747.1	1.56559	0.0124598	0.598006	up	2:-:148324254-148335696	MERGE.34747	2:-:148324254-148335696	-	-	-	-	-	-	5.01263	1.45936	2.6474	1.021	0.88414	0.97412
NONMMUT004603.2	1.51936	0.00579403	0.452374	up	10:+:7663371-7664623	MERGE.4209	10:+:7663371-7664623	10:+:7663371-7664623	NONMMUG002966.2	-	-	-	lncRNA	1.11422	0.71104	1.11324	0.31643	0.35154	0.38191
MERGE.10853.1	-1.04281648244555	0.0287333	0.724147	down	11:-:108272377-108286630	MERGE.10853	11:-:108272377-108286630	-	-	-	-	-	-	3.674	1.37585	1.96137	3.55213	5.01674	5.44549
NONMMUT057843.2	-1.04588521436404	0.0487459	0.730234	down	6:-:87830039-87830444	MERGE.49444	6:-:87830039-87832866	6:-:87830039-87830444	NONMMUG035921.2	-	-	-	lncRNA	1.86568	0.77607	1.5857	2.83209	2.23764	3.70925
NONMMUT097242.1	-1.40894841284077	0.01994	0.665642	down	15:-:68303155-68305796	MERGE.21085	15:-:68303155-68308297	15:-:68303155-68305796	NONMMUG060784.1	-	-	-	lncRNA	0.9107	0.45648	0.33393	2.2661	1.30772	1.04412
NONMMUT056611.2	1.76453	0.0119215	0.589666	up	6:+:41547606-41548348	MERGE.48299	6:+:41546730-41548352	6:+:41547606-41548348	NONMMUG035148.2	-	-	-	lncRNA	3.22175	4.57226	5.94814	2.20751	1.34364	0.88537
NONMMUT012442.2	-1.33444387330628	0.0173004	0.647063	down	11:-:107268591-107270347	MERGE.10770	11:-:107268591-107270347	11:-:107268591-107270347	NONMMUG007885.2	-	-	-	lncRNA	1.70755	0.51326	0.66498	2.76063	2.03692	1.95455
NONMMUT036171.2	1.44324	0.00475279	0.414659	up	2:-:25141797-25145396	MERGE.31553	2:-:25122603-25145396	2:-:25141797-25145396	NONMMUG022267.2	-	-	-	lncRNA	2.21718	1.21133	1.12643	0.47951	0.64507	0.59574
NONMMUT011503.2	-1.68318897399896	0.0113332	0.580717	down	11:-:90538484-90539146	MERGE.10090	11:-:90538484-90539146	11:-:90538484-90539146	NONMMUG007272.2	-	-	-	lncRNA	0.29122	0.24581	0.28771	0.85717	0.8097	1.18878
MERGE.11320.1	6.14527	0.0256769	0.705882	up	11:-:120653628-120661175	MERGE.11320	11:-:120653628-120661175	-	-	-	-	-	-	2.41197	0.69584	2.51968	0	0	1.69974
NONMMUT101334.1	-1.75193679969	0.00942173	0.548599	down	17:+:66248566-66251359	NONMMUG063402.1	17:+:66248566-66251359	17:+:66248566-66251359	NONMMUG063402.1	-	-	-	lncRNA	0.404	0.24888	0.13228	1.16838	0.64046	0.78583
MERGE.5951.1	3.75957	0.0193554	0.660491	up	10:-:78583999-78591942	MERGE.5951	10:-:78583999-78591964	-	-	-	-	-	-	0.35354	1.50223	1.17138	0.22758	0.08366	0.01426
NONMMUT042028.2	-3.3601618382274	0.0457803	0.730234	down	3:+:7551674-7553753	MERGE.36058	3:+:7503483-7553836	3:+:7551674-7553753	NONMMUG026019.2	-	-	-	lncRNA	0.41415	0.22984	14.7364	11.774	12.2693	12.5248
NONMMUT115265.1	-1.94432057567707	0.0303618	0.730234	down	4:+:86006819-86007545	MERGE.41331	4:+:86006819-86007545	4:+:86006819-86007545	NONMMUG072295.1	-	-	-	lncRNA	0.49031	0.05978	0.13119	0.58174	0.54908	0.7163
NONMMUT129534.1	-1.90450897583318	0.0104325	0.569353	down	8:+:108623679-108624491	MERGE.58040	8:+:108623679-108624491	8:+:108623679-108624491	NONMMUG081381.1	-	-	-	lncRNA	0.21922	0.16037	0.11732	0.69902	0.74496	0.46741
MERGE.54232.1	1.6009	0.0137126	0.613328	up	7:-:125443673-125444257	MERGE.54232	7:-:125443673-125444257	-	-	-	-	-	-	2.58963	1.41152	1.85456	1.19738	0.47059	0.45712
NONMMUT016865.2	-1.36759989232187	0.00125353	0.223845	down	13:-:31072730-31077845	MERGE.14837	13:-:31072730-31078159	13:-:31072730-31077845	NONMMUG010612.2	-	-	-	lncRNA	1.04617	0.77017	0.98374	2.74258	2.27157	2.70975
MERGE.1482.1	3.25879	0.0411764	0.730234	up	1:-:82232824-82291416	MERGE.1482	1:-:82232824-82291416	-	-	-	-	-	-	1.03791	0.58915	0.70034	0.07083	0.01013	0.82973
NONMMUT032281.2	1.45518	0.0392884	0.730234	up	18:-:46735547-46741578	MERGE.28165	18:-:46729178-46741579	18:-:46735547-46741578	NONMMUG019868.2	-	-	-	lncRNA	1.36379	0.52258	0.70897	0.50277	0.41529	0.12924
NONMMUT033021.2	1.45579	0.00964942	0.555125	up	18:+:74286108-74288724	MERGE.28760	18:+:74286108-74288724	18:+:74286108-74288724	NONMMUG020327.2	-	-	-	lncRNA	3.34276	1.4531	1.79037	0.55047	1.00988	0.95191
MERGE.61979.7	-1.58957415172326	0.0129164	0.604337	down	9:+:119004607-119032208	MERGE.61979	9:+:118926453-119044124	-	-	-	-	-	-	2.11966	0.91408	1.54862	3.07501	8.16743	3.78129
MERGE.52859.12	5.83014	0.0460751	0.730234	up	7:-:67234207-67316965	MERGE.52859	7:-:67227730-67372858	-	-	-	-	-	-	25.2669	10.0939	24.2529	0	3.60773	4.57416
NONMMUT109889.1	1.12297	0.0136745	0.613328	up	2:-:148430662-148431274	MERGE.34757	2:-:148426822-148443563	2:-:148430662-148431274	NONMMUG025017.2	-	-	-	lncRNA	16.9117	7.21379	8.77143	5.51941	4.94009	4.72971
NONMMUT064312.2	-6.10786873518921	0.000524057	0.145985	down	7:-:143293721-143298451	MERGE.54887	7:-:143203458-143298451	7:-:143293721-143298451	NONMMUG039685.2	-	-	-	lncRNA	0.40812	0.01148	0.02016	3.01427	2.92115	3.01657
MERGE.7129.1	-1.56092601852461	0.0108843	0.57616	down	10:+:122739080-122739640	MERGE.7129	10:+:122739080-122739640	-	-	-	-	-	-	0.71482	0.30988	0.6588	1.93181	1.37403	1.58054
MERGE.2529.19	-1.02592950972642	0.015897	0.635641	down	1:-:131331308-131527352	MERGE.2529	1:-:131284350-131527352	-	-	-	-	-	-	1.77838	0.89871	1.73523	3.55643	3.08378	2.60823
NONMMUT049530.2	-3.11374185084552	0.00267367	0.324101	down	4:+:127046383-127046602	MERGE.42306	4:+:127046383-127046602	4:+:127046383-127046602	NONMMUG030664.2	-	-	-	lncRNA	0.20253	0.19755	0.16257	2.10261	1.75189	1.66333
NONMMUT031679.2	-1.18621324776694	0.00468537	0.413963	down	18:+:23436598-23439968	MERGE.27497	18:+:23436598-23439968	18:+:23436598-23439968	NONMMUG019472.2	-	-	-	lncRNA	1.77998	0.88312	1.13881	2.99143	2.69499	3.24407
MERGE.2376.1	-1.32539785697334	0.0455737	0.730234	down	1:-:127565823-127566186	MERGE.2376	1:-:127565823-127566186	-	-	-	-	-	-	1.3057	0.53728	0.85158	1.45235	2.19331	3.36392
NONMMUT131723.1	-1.29337626655386	0.0276056	0.715612	down	8:-:115595020-115595815	MERGE.58262	8:-:115595020-115595815	8:-:115595020-115595815	NONMMUG082905.1	-	-	-	lncRNA	0.29854	0.51868	0.55417	1.32828	1.08943	1.13161
NONMMUT136706.1	2.13181	0.00319803	0.352286	up	X:-:9646111-9648825	MERGE.62439	X:-:9607206-9648825	X:-:9646111-9648825	NONMMUG086342.1	-	-	-	lncRNA	1.05033	0.4322	0.4479	0.1363	0.13182	0.14515
NONMMUT080503.1	-1.27379922015845	0.0419068	0.730234	down	10:+:82007079-82007964	MERGE.6198	10:+:82007079-82007964	10:+:82007079-82007964	NONMMUG050084.1	-	-	-	lncRNA	0.21792	0.50278	0.47096	1.01435	0.97877	0.98489
MERGE.19298.1	1.39491	0.0253558	0.703054	up	14:+:77048064-77052394	MERGE.19298	14:+:77048064-77052394	-	-	-	-	-	-	2.92176	0.74256	1.18643	0.54318	0.51169	0.63369
NONMMUT009438.2	-1.11295154930759	0.00769653	0.507509	down	11:+:44776963-44778892	MERGE.8271	11:+:44776963-44778892	11:+:44776963-44778892	NONMMUG005886.2	-	-	-	lncRNA	0.70798	0.4954	0.57449	1.36273	1.21245	1.5387
NONMMUT031985.2	-2.45264584643326	0.00637138	0.469361	down	18:-:36182952-36184934	MERGE.27830	18:-:36182952-36184934	18:-:36182952-36184934	NONMMUG019666.2	-	-	-	lncRNA	0.23218	0.16437	0.0481	0.61983	0.6525	0.87299
MERGE.37773.3	1.03981	0.0284462	0.721998	up	3:-:88410499-88425102	MERGE.37773	3:-:88410498-88425139	-	-	-	-	-	-	3.97278	3.52946	1.90852	1.59742	1.2367	1.92765
NONMMUT105946.1	-3.24574709396483	0.0375867	0.730234	down	19:-:18631683-18632157	MERGE.29713	19:-:18579328-18632157	19:-:18631683-18632157	NONMMUG020933.2	-	-	-	lncRNA	0	0.05199	0.17113	1.29635	0.55982	0.20202
NONMMUT057819.2	-1.02874698278308	0.0222503	0.685406	down	6:-:87252250-87255608	MERGE.49417	6:-:87252250-87255608	6:-:87252250-87255608	NONMMUG035904.2	-	-	-	lncRNA	2.22408	1.11917	1.17482	2.38438	3.139	4.16909
MERGE.3017.1	7.17473	0.0252258	0.702508	up	1:-:155776029-155812820	MERGE.3017	1:-:155776029-155812889	-	-	-	-	-	-	2.2467	2.09209	0.43461	0	0.75268	0
MERGE.30501.1	1.28287	0.0322466	0.730234	up	19:-:45750261-45783520	MERGE.30501	19:-:45750261-45784161	-	-	-	-	-	-	1.84648	0.74407	0.95463	0.33817	0.86186	0.38978
MERGE.30501.5	1.0851	0.0344339	0.730234	up	19:-:45750261-45784161	MERGE.30501	19:-:45750261-45784161	-	-	-	-	-	-	5.03678	2.02089	2.22348	1.27703	1.76879	1.17609
MERGE.27943.1	2.02708	0.0232349	0.692731	up	18:-:38327382-38338909	MERGE.27943	18:-:38327382-38339003	-	-	-	-	-	-	2.88809	3.46459	3.41177	0.51212	2.74515	0.43529
NONMMUT037499.2	1.47859	0.00920429	0.543727	up	2:-:60603086-60603947	MERGE.32491	2:-:60598292-60722643	2:-:60603086-60603947	NONMMUG023127.2	-	-	-	lncRNA	3.39432	2.0041	2.04696	1.02726	0.59084	1.25722
NONMMUT081420.1	2.26327	0.00595625	0.458101	up	10:-:9177442-9178190	MERGE.4306	10:-:9072554-9183870	10:-:9177442-9178190	NONMMUG050613.1	-	-	-	lncRNA	0.57506	0.53672	0.60486	0.12352	0.11027	0.11275
MERGE.53683.1	-1.06653991612616	0.0353864	0.730234	down	7:-:102032167-102032654	MERGE.53683	7:-:102032167-102032654	-	-	-	-	-	-	2.73915	1.60303	2.76066	4.17075	4.23101	7.75819
NONMMUT026523.2	-1.30589044275727	0.00740262	0.499475	down	16:-:37838319-37843630	MERGE.23453	16:-:37838319-37844016	16:-:37838319-37843630	NONMMUG016424.2	-	-	-	lncRNA	0.22468	0.31574	0.29426	0.76552	0.72879	0.73117
MERGE.58693.1	-1.27426990986532	0.0268281	0.712324	down	9:+:14806439-14807250	MERGE.58693	9:+:14806439-14807250	-	-	-	-	-	-	1.99372	0.70917	0.69007	1.93689	2.94962	2.75594
NONMMUT027428.2	-4.41198116340721	0.0140158	0.615945	down	16:-:78544123-78544440	MERGE.23972	16:-:78540340-78576657	16:-:78544123-78544440	NONMMUG017001.2	-	-	-	lncRNA	11.723	0.1025	0.14996	11.554	11.1244	10.2681
MERGE.16133.4	2.98801	0.0264499	0.709465	up	13:+:74639873-74646459	MERGE.16133	13:+:74639568-74693680	-	-	-	-	-	-	1.30801	1.97545	1.55801	0.11264	0.0391	1.07957
NONMMUT027373.2	-1.6093628078983	0.00873733	0.533331	down	16:+:77468113-77469911	MERGE.24032	16:+:77468113-77470815	16:+:77468113-77469911	NONMMUG016970.2	-	-	-	lncRNA	1.53559	1.58234	0.69584	3.23247	3.56556	5.28081
MERGE.21678.7	2.94418	0.00278803	0.331386	up	15:+:83573497-83574203	MERGE.21678	15:+:83563592-83574205	-	-	-	-	-	-	2.10082	1.78701	1.27457	0.15216	0.47543	0.13889
NONMMUT009807.2	-1.15909584259622	0.0336811	0.730234	down	11:-:54746357-54746824	MERGE.8571	11:-:54746357-54746824	11:-:54746357-54746824	NONMMUG006146.2	-	-	-	lncRNA	0.85686	0.41788	0.91709	1.49673	1.82355	1.50367
NONMMUT151338.1	-5.47341108052715	0.000174919	0.0749774	down	7:+:134661681-134662057	MERGE.54499	7:+:134661681-134662057	7:+:134661681-134662057	NONMMUG095082.1	-	-	-	lncRNA	0	0	0	1.0517	0.36512	1.11997
MERGE.51126.2	7.86211	0.00837589	0.5271	up	7:-:4660521-4684981	MERGE.51126	7:-:4660521-4685068	-	-	-	-	-	-	4.88159	9.65055	11.1289	0	2.49105	0
MERGE.52332.32	-3.8945697776552	0.0020596	0.286683	down	7:-:45131187-45136056	MERGE.52332	7:-:45125558-45136432	-	-	-	-	-	-	0.02857	0.12541	0.01835	0.63056	0.88447	0.62817
MERGE.52008.1	-4.77160947864926	0.0010384	0.210344	down	7:+:33158305-33158528	MERGE.52008	7:+:33158305-33158528	-	-	-	-	-	-	0	0.14551	0	1.06203	1.47481	1.63363
MERGE.56542.15	4.32719	0.02569	0.705882	up	8:-:69908657-69996091	MERGE.56542	8:-:69907069-69996384	-	-	-	-	-	-	0.43817	0.76462	0.93794	0.09748	0.22843	0
MERGE.59625.1	-1.16720739930592	0.0275534	0.715612	down	9:-:40384748-40385291	MERGE.59625	9:-:40384748-40385291	-	-	-	-	-	-	1.85654	0.95868	1.66559	2.3809	3.97259	4.29474
MERGE.2394.30	-1.16250525029173	0.0139728	0.61557	down	1:-:126334475-126492927	MERGE.2394	1:-:125913620-126830799	-	-	-	-	-	-	11.1523	5.05151	7.00575	12.9522	16.1642	20.755
NONMMUT009687.2	-5.91219147500269	0.0102243	0.565749	down	11:+:51903076-51909635	MERGE.8455	11:+:51898326-51909635	11:+:51903076-51909635	NONMMUG006061.3	-	-	-	lncRNA	0	0	0.46289	0.78761	0.98187	1.33436
NONMMUT117918.1	-1.20411258109958	0.00861087	0.530461	down	5:+:9169839-9171585	MERGE.43710	5:+:9169839-9171585	5:+:9169839-9171585	NONMMUG073986.1	-	-	-	lncRNA	3.01807	1.92174	1.3444	4.96277	4.53051	5.28493
MERGE.39961.2	5.11302	0.0447246	0.730234	up	4:-:12100541-12171832	MERGE.39961	4:-:12100492-12172015	-	-	-	-	-	-	0.01305	1.99542	0.32477	0	0	0.01237
NONMMUT047943.2	-1.35326608901105	0.0163369	0.638915	down	4:-:84658183-84660955	MERGE.41212	4:-:84658183-84660955	4:-:84658183-84660955	NONMMUG029727.2	-	-	-	lncRNA	0.65344	0.23509	0.26656	0.92939	0.72473	1.18767
NONMMUT082806.1	-2.21649773753676	0.00252025	0.313913	down	10:-:119052804-119053576	MERGE.6971	10:-:119052804-119053576	10:-:119052804-119053576	NONMMUG051534.1	-	-	-	lncRNA	0.90305	0.28111	0.84828	2.66722	3.34773	2.76753
MERGE.9606.1	-1.07686167518228	0.0400341	0.730234	down	11:-:78541496-78550748	MERGE.9606	11:-:78541496-78550777	-	-	-	-	-	-	5.24026	1.37776	2.67112	6.63425	5.48063	6.19567
NONMMUT008280.2	6.24061	0.0144239	0.623102	up	11:+:3452215-3458359	MERGE.7433	11:+:3452215-3479832	11:+:3452215-3458359	NONMMUG005112.2	-	-	-	lncRNA	1.57408	1.88845	1.70156	0	1.4718	0
NONMMUT005632.2	-1.17343870379433	0.0236171	0.693117	down	10:-:53959897-53962747	MERGE.5380	10:-:53959897-53962747	10:-:53959897-53962747	NONMMUG003649.2	-	-	-	lncRNA	2.20251	1.04944	0.93322	2.5104	2.70849	4.58869
NONMMUT107793.1	2.18444	0.0215298	0.679548	up	2:+:118577125-118578067	MERGE.33834	2:+:118577125-118578067	2:+:118577125-118578067	NONMMUG067399.1	-	-	-	lncRNA	1.6695	0.62217	1.54242	0.53258	0.35033	0.08955
MERGE.20849.1	-3.80580488669179	0.0466998	0.730234	down	15:-:55160569-55160852	MERGE.20849	15:-:55160569-55160852	-	-	-	-	-	-	0.10459	0	0.12594	0.32576	4.89526	0.59469
MERGE.36115.1	-1.96038465445642	0.00145866	0.240494	down	3:-:9687479-9833596	MERGE.36115	3:-:9687479-9833679	-	-	-	-	-	-	1.40673	1.07526	1.18428	3.08855	5.41336	7.40782
MERGE.40469.1	-1.25455287130171	0.0214402	0.678964	down	4:+:42197609-42201164	MERGE.40469	4:+:42197609-42201164	-	-	-	-	-	-	1.95886	0.59886	0.65713	2.51617	2.26834	2.26393
NONMMUT114361.1	-1.18099475623974	0.0458616	0.730234	down	3:-:149145200-149146263	MERGE.39527	3:-:149145200-149146263	3:-:149145200-149146263	NONMMUG071718.1	-	-	-	lncRNA	0.5444	0.22465	0.437	0.62107	1.20313	0.93917
MERGE.23644.12	6.96797	0.0163717	0.638915	up	16:-:45746244-45844343	MERGE.23644	16:-:45729725-45953598	-	-	-	-	-	-	1.81311	1.57634	2.02216	1.88985	0	0
MERGE.23644.15	-1.55157572303681	0.00388611	0.380253	down	16:-:45746244-45845238	MERGE.23644	16:-:45729725-45953598	-	-	-	-	-	-	1.04804	0.43334	0.51615	1.51605	2.0435	2.38211
MERGE.10684.1	1.15574	0.0258728	0.706172	up	11:-:106026926-106033743	MERGE.10684	11:-:106026926-106033743	-	-	-	-	-	-	5.93394	2.56406	5.71801	1.87061	1.69184	2.87762
NONMMUT073660.2	7.63623	1.74779e-06	0.00619196	up	X:+:108834657-108886896	MERGE.63632	X:+:108833800-108977903	X:+:108834657-108886896	NONMMUG045662.3	-	-	-	lncRNA	1.93725	1.41717	1.61789	0	0	0
NONMMUT028605.2	7.5058	1.63722e-05	0.017901	up	17:+:23743234-23750915	MERGE.25047	17:+:23743234-23754066	17:+:23743234-23750915	NONMMUG017700.2	-	-	-	lncRNA	0.45432	0.77952	0.68297	0	0	0
NONMMUT066002.2	-1.17231871792665	0.0353947	0.730234	down	8:+:70494846-70497518	MERGE.56585	8:+:70494846-70497518	8:+:70494846-70497518	NONMMUG040841.2	-	-	-	lncRNA	0.25559	0.2073	0.20963	0.68727	0.6952	0.31066
MERGE.46306.3	3.1974	0.0282027	0.719663	up	5:-:121815648-121836817	MERGE.46306	5:-:121814197-121838926	-	-	-	-	-	-	4.48411	6.30904	5.40482	0.07493	2.02587	1.59596
NONMMUT097483.1	1.61657	0.00692265	0.484495	up	15:-:83262873-83265015	MERGE.21781	15:-:83250557-83265015	15:-:83262873-83265015	NONMMUG015090.2	-	-	-	lncRNA	0.65148	0.62361	0.75661	0.27753	0.15416	0.28897
NONMMUT139144.1	3.75677	0.0213217	0.677528	up	1:-:130682148-130684045	MERGE.2484	1:-:130670209-130729253	1:-:130682148-130684045	NONMMUG087931.1	-	-	-	lncRNA	0.67998	0.6807	0.5171	0	0.43119	0
NONMMUT021953.2	-1.08124247208338	0.0152013	0.628516	down	14:-:97897665-97898789	MERGE.19473	14:-:97897665-97898789	14:-:97897665-97898789	NONMMUG013632.2	-	-	-	lncRNA	4.26426	2.30821	3.71971	5.639	8.19775	9.508
MERGE.10844.1	-1.02736863148953	0.0333277	0.730234	down	11:-:108221914-108229327	MERGE.10844	11:-:108221914-108229327	-	-	-	-	-	-	2.66836	1.08005	1.63539	2.48677	4.10867	4.66424
NONMMUT123113.1	4.46628	0.026696	0.711563	up	6:+:133132982-133135977	NONMMUG077217.1	6:+:133132982-133135977	6:+:133132982-133135977	NONMMUG077217.1	-	-	-	lncRNA	2.2209	0.73618	0.72822	0.2735	0.20215	0
MERGE.2721.1	1.14925	0.0470797	0.730234	up	1:+:136703936-136705432	MERGE.2721	1:+:136703936-136705432	-	-	-	-	-	-	2.95657	0.82739	1.27424	0.58269	0.79077	0.73333
NONMMUT053432.2	-3.17682079747959	0.0362109	0.730234	down	5:+:104500171-104501090	MERGE.45646	5:+:104459147-104505849	5:+:104500171-104501090	NONMMUG093742.1	-	-	-	lncRNA	0.12915	0.07086	3.35634	2.91623	2.84275	4.19171
MERGE.40418.1	-1.76963162311174	0.0288007	0.724224	down	4:+:42928288-42928692	MERGE.40418	4:+:42928288-42928692	-	-	-	-	-	-	1.17351	0.2951	0.35325	1.17479	1.76734	2.50211
MERGE.20171.1	-1.00114162621887	0.0429544	0.730234	down	15:-:26837439-26839265	MERGE.20171	15:-:26837439-26839265	-	-	-	-	-	-	1.93478	0.88014	0.894	1.87359	2.29791	3.55903
NONMMUT018127.2	-3.42143784822768	0.0447165	0.730234	down	13:+:67729262-67756838	MERGE.15951	13:+:67729262-67756838	13:+:67729262-67756838	NONMMUG011320.2	-	-	-	lncRNA	0	0.16813	0.12299	0.36359	0.57275	0.63402
MERGE.24096.4	-1.68417357106929	0.00048859	0.138838	down	16:-:87401265-87432543	MERGE.24096	16:-:87376441-87432606	-	-	-	-	-	-	2.83743	2.88836	2.16121	7.48971	8.65306	10.6144
MERGE.24096.1	1.12661	0.00675306	0.479124	up	16:-:87376441-87432536	MERGE.24096	16:-:87376441-87432606	-	-	-	-	-	-	2.11613	2.88081	2.21086	1.29546	0.94651	1.24338
MERGE.16757.9	9.18373	7.04077e-06	0.0102843	up	13:-:103819607-103920514	MERGE.16757	13:-:103818787-103920514	-	-	-	-	-	-	0.93457	0.83316	1.31666	0.00242	0	0
NONMMUT031373.2	-3.75823591959032	0.00141596	0.23749	down	18:-:6054844-6057704	MERGE.27203	18:-:6024427-6136098	18:-:6054844-6057704	NONMMUG019267.2	-	-	-	lncRNA	1.05383	0.13671	0.85843	4.64722	7.79898	9.65182
NONMMUT121048.1	-1.3751842258176	0.0465017	0.730234	down	5:-:109754697-109755375	MERGE.45881	5:-:109754697-109755375	5:-:109754697-109755375	NONMMUG075921.1	-	-	-	lncRNA	0.30623	0.24002	0.2107	0.44768	0.77035	0.91203
MERGE.43991.3	6.62661	0.0429802	0.730234	up	5:-:23503282-23675975	MERGE.43991	5:-:23503264-23684617	-	-	-	-	-	-	2.71585	1.876	0.5892	0	3.59481	0
MERGE.17531.5	1.4522	0.00206234	0.286683	up	14:-:20723749-20734562	MERGE.17531	14:-:20723730-20734562	-	-	-	-	-	-	1.476	1.3122	1.14093	0.65063	0.47815	0.42738
MERGE.4624.1	-1.50581346847643	0.0149031	0.626225	down	10:+:18320493-18321424	MERGE.4624	10:+:18320493-18321424	-	-	-	-	-	-	1.27487	0.41968	1.18966	3.20483	2.68799	1.96316
NONMMUT101953.1	2.80056	0.0221658	0.685211	up	17:-:28382985-28384481	NONMMUG063807.1	17:-:28382985-28384481	17:-:28382985-28384481	NONMMUG063807.1	-	-	-	lncRNA	1.53781	0.29031	0.52563	0.03531	0.11034	0.15043
MERGE.42601.22	4.77949	0.0311029	0.730234	up	4:-:133970921-134000847	MERGE.42601	4:-:133962254-134000918	-	-	-	-	-	-	1.76655	0.72938	0.84684	1.53885	0.00383	0.00392
MERGE.47043.1	-2.73004629947817	0.0480656	0.730234	down	5:-:140879640-140880139	MERGE.47043	5:-:140879640-140880139	-	-	-	-	-	-	0.44557	0.04346	0.28613	1.55954	0.49554	2.81487
NONMMUT019407.2	1.14048	0.0436961	0.730234	up	13:-:114281668-114284381	MERGE.16977	13:-:114270651-114284749	13:-:114281668-114284381	NONMMUG057545.2	-	-	-	lncRNA	1.83875	1.22501	1.32663	0.39445	0.71512	1.23941
MERGE.6655.1	-1.80027679260329	0.00809173	0.52025	down	10:+:103353759-103354585	MERGE.6655	10:+:103353759-103354585	-	-	-	-	-	-	0.52082	0.72258	0.49015	1.47026	2.3635	2.87614
NONMMUT067044.2	1.68722	0.0169157	0.644318	up	8:+:107188902-107190458	MERGE.57730	8:+:107188902-107190458	8:+:107188902-107190458	NONMMUG041509.2	-	-	-	lncRNA	0.94437	0.46754	0.90354	0.13581	0.40667	0.23502
NONMMUT111887.1	-1.54074327372082	0.0191429	0.659628	down	3:+:106075642-106076443	NONMMUG070045.1	3:+:106075642-106076443	3:+:106075642-106076443	NONMMUG070045.1	-	-	-	lncRNA	0.55557	0.21676	0.17839	0.92284	0.77234	0.80726
NONMMUT068714.2	-2.995489338372	0.0463901	0.730234	down	9:+:41376226-41393332	MERGE.59678	9:+:41327081-41658013	9:+:41376226-41393332	NONMMUG042550.3	-	-	-	lncRNA	0.40277	0	0.08083	0.49281	0.83989	0.33397
NONMMUT123375.1	-1.15634000311259	0.0347908	0.730234	down	6:-:3335646-3346119	MERGE.47442	6:-:3331080-3399572	6:-:3335646-3346119	NONMMUG034483.3	-	-	-	lncRNA	0.5398	0.33847	0.25998	0.78228	0.74328	1.03767
MERGE.39860.1	-1.50890741768429	0.0220439	0.684501	down	4:+:8301024-8301226	MERGE.39860	4:+:8301024-8301226	-	-	-	-	-	-	0.58531	0.74931	0.76349	2.08337	2.30545	2.01062
NONMMUT045309.2	3.47897	0.0479149	0.730234	up	3:-:131318990-131320239	MERGE.39150	3:-:131318985-131491411	3:-:131318990-131320239	NONMMUG027960.2	-	-	-	lncRNA	2.70906	4.58938	2.97577	0.06344	0.0881	5.59596
NONMMUT043064.2	-1.14005438811521	0.011137	0.579591	down	3:+:53154913-53157218	MERGE.36964	3:+:53154913-53157218	3:+:53154913-53157218	NONMMUG026595.2	-	-	-	lncRNA	3.03358	1.30041	1.66993	3.69669	4.65594	5.12682
MERGE.63012.13	1.77781	0.010717	0.573313	up	X:-:73947195-73966351	MERGE.63012	X:-:73942792-73966948	-	-	-	-	-	-	1.53081	2.68727	1.30316	0.92404	0.33435	0.5128
NONMMUT096347.1	-1.21195769322258	0.0450572	0.730234	down	15:+:89128749-89132248	MERGE.21895	15:+:89128749-89132248	15:+:89128749-89132248	NONMMUG060233.1	-	-	-	lncRNA	0.31128	0.21958	0.13386	0.40559	0.62849	0.50566
NONMMUT034224.2	2.29071	0.0147107	0.625329	up	19:-:24037453-24040423	MERGE.29858	19:-:24037453-24040423	19:-:24037453-24040423	NONMMUG021032.2	-	-	-	lncRNA	1.2594	0.63538	0.66234	0.19322	0.32199	0.06173
MERGE.5273.1	-1.95772734776518	0.0184791	0.656239	down	10:+:45037301-45037986	MERGE.5273	10:+:45037301-45037986	-	-	-	-	-	-	0.86602	0.12671	0.34758	1.23302	1.12366	1.66184
NONMMUT045048.2	-4.63432052359173	0.000208012	0.0829163	down	3:-:121846772-121847201	NONMMUG027797.3	3:-:121833277-121847201	3:-:121846772-121847201	NONMMUG027797.3	-	-	-	lncRNA	0	0	0	0.33997	0.61964	0.58832
MERGE.13320.1	1.76021	0.00843516	0.528622	up	12:+:87167159-87180029	MERGE.13320	12:+:87167159-87180029	-	-	-	-	-	-	2.9843	0.87958	1.48593	0.62349	0.41687	0.45084
NONMMUT053458.2	-1.1691268980846	0.0193838	0.660906	down	5:+:104571656-104693297	MERGE.45654	5:+:104570652-104749234	5:+:104571656-104693297	NONMMUG033187.2	-	-	-	lncRNA	0.37379	0.17999	0.24308	0.50525	0.53937	0.81155
NONMMUT006044.2	-1.14576048437209	0.0200608	0.66703	down	10:-:68154398-68159286	MERGE.5701	10:-:68154398-68159286	10:-:68154398-68159286	NONMMUG003888.2	-	-	-	lncRNA	2.21251	0.76071	0.87532	2.8126	2.51629	2.74358
MERGE.50303.8	-2.33664478369334	0.0205079	0.671067	down	6:-:122317859-122339654	MERGE.50303	6:-:122317731-122340561	-	-	-	-	-	-	0.59583	0.1004	0.07792	1.51317	0.81901	0.49484
NONMMUT104781.1	-1.53721089097302	0.029133	0.724999	down	18:-:66238701-66265311	MERGE.28619	18:-:66238701-66265311	18:-:66238701-66265311	NONMMUG065552.1	-	-	-	lncRNA	1.63571	0.35898	0.70903	2.18333	1.66755	2.91407
NONMMUT054793.2	2.13503	0.00239836	0.307555	up	5:-:134738233-134738818	MERGE.46725	5:-:134738233-134738818	5:-:134738233-134738818	NONMMUG033995.2	-	-	-	lncRNA	9.55514	3.41154	7.79212	1.87195	1.45635	1.29695
NONMMUT075149.1	-3.27292321419139	0.0403988	0.730234	down	1:+:23329846-23330609	NONMMUG046596.1	1:+:23329846-23330609	1:+:23329846-23330609	NONMMUG046596.1	-	-	-	lncRNA	0.3888	0	0.28089	0.96874	1.04498	0.57108
MERGE.11059.12	7.87762	0.0125578	0.599365	up	11:-:115584364-115603893	MERGE.11059	11:-:115583685-115604051	-	-	-	-	-	-	5.26736	6.88725	2.73831	0	2.91949	0
NONMMUT010819.2	-1.0665581178896	0.00751169	0.502123	down	11:+:77334421-77337723	MERGE.9527	11:+:77334421-77337723	11:+:77334421-77337723	NONMMUG006822.2	-	-	-	lncRNA	0.87234	0.54276	0.75438	1.42047	1.57527	1.85783
MERGE.11723.1	-6.9431559326932	0.000121849	0.0583111	down	12:+:18745517-18746275	MERGE.11723	12:+:18745517-18746275	-	-	-	-	-	-	0	0.02863	0	1.20149	2.28508	2.15102
NONMMUT147218.1	1.92012	0.00542139	0.436341	up	2:-:167827153-167834876	NONMMUG025579.3	2:-:167827153-167834876	2:-:167827153-167834876	NONMMUG025579.3	-	-	-	lncRNA	1.29794	1.2688	0.57419	0.23271	0.41701	0.21866
NONMMUT006953.2	2.29889	0.00329307	0.354248	up	10:-:95408353-95412199	MERGE.6572	10:-:95381576-95417559	10:-:95408353-95412199	NONMMUG004471.2	-	-	-	lncRNA	13.4084	3.77324	8.56274	2.04756	1.26306	1.66097
NONMMUT021926.2	1.59014	0.0376723	0.730234	up	14:-:93861492-93864355	MERGE.19465	14:-:93860379-93864355	14:-:93861492-93864355	NONMMUG013618.2	-	-	-	lncRNA	1.10459	0.52732	0.61193	0.11075	0.25473	0.56514
NONMMUT097735.1	-1.88354408958954	0.0433621	0.730234	down	15:-:101395405-101397158	MERGE.22301	15:-:101395405-101412311	15:-:101395405-101397158	NONMMUG061086.1	-	-	-	lncRNA	0.67357	0.1971	1.86537	2.51741	3.21493	1.78722
MERGE.45686.1	-2.47734783369298	0.0208844	0.675085	down	5:-:104958464-104959053	MERGE.45686	5:-:104958464-104959053	-	-	-	-	-	-	0.50347	0.07366	0.80828	1.25444	2.16972	2.29006
MERGE.57345.3	2.73383	0.0499636	0.730234	up	8:+:94172776-94173552	MERGE.57345	8:+:94172664-94180327	-	-	-	-	-	-	1.42901	1.52521	2.72667	0.02085	0.91187	0.73258
MERGE.57345.2	1.8267	0.00289089	0.338873	up	8:+:94172695-94180325	MERGE.57345	8:+:94172664-94180327	-	-	-	-	-	-	7.15811	6.87425	6.7331	1.31883	2.45488	2.80889
NONMMUT078322.1	-2.14648236094054	0.00136294	0.232505	down	1:-:101898092-101899127	NONMMUG048627.1	1:-:101898092-101899127	1:-:101898092-101899127	NONMMUG048627.1	-	-	-	lncRNA	0.3154	0.28316	0.23016	1.14814	1.39509	1.37211
MERGE.46745.9	-3.71410056417205	0.00221408	0.299754	down	5:-:135053333-135064079	MERGE.46745	5:-:135052957-135064959	-	-	-	-	-	-	0.34366	0.05465	0.41979	3.37723	3.35121	1.72743
MERGE.37970.1	-4.64918313840847	0.00222938	0.300023	down	3:+:91354798-91355015	MERGE.37970	3:+:91354798-91355015	-	-	-	-	-	-	0	0	0.10938	0.97001	0.50513	2.58245
NONMMUT039730.2	5.53133	0.0330261	0.730234	up	2:-:128311684-128315999	MERGE.34199	2:-:128311684-128315999	2:-:128311684-128315999	NONMMUG024584.2	-	-	-	lncRNA	0.75022	0.72838	0.56058	1.38748	0	0
NONMMUT061098.2	4.10838	0.0274632	0.715542	up	7:+:44986948-44991518	MERGE.52316	7:+:44986900-44994601	7:+:44986948-44991518	NONMMUG037943.2	-	-	-	lncRNA	0.73604	1.05765	0.23211	0	0	0.27401
MERGE.41260.1	-1.40315145993364	0.0230685	0.692035	down	4:+:85584409-85585944	MERGE.41260	4:+:85584409-85585944	-	-	-	-	-	-	0.59951	0.41027	0.40361	0.93788	1.05746	2.27242
NONMMUT028634.2	1.79996	0.0201259	0.667652	up	17:-:24203848-24205621	MERGE.25059	17:-:24155732-24209387	17:-:24203848-24205621	NONMMUG017717.2	-	-	-	lncRNA	1.23071	1.0473	1.00135	0.12665	0.54315	0.52362
MERGE.41288.1	-1.04653828214673	0.0173622	0.647805	down	4:+:85849136-85851194	MERGE.41288	4:+:85849136-85851194	-	-	-	-	-	-	0.92331	0.69654	1.14647	1.8743	1.72479	2.56332
NONMMUT073946.2	5.52899	0.0119788	0.58999	up	X:+:135803038-135803464	MERGE.63822	X:+:135742703-135891081	X:+:135803038-135803464	NONMMUG045860.2	-	-	-	lncRNA	12.4523	13.3332	12.3409	0.03095	0.03224	9.85534
NONMMUT048867.2	1.37199	0.0388928	0.730234	up	4:+:116687704-116688925	MERGE.41931	4:+:116685544-116700822	4:+:116687704-116688925	NONMMUG030346.2	-	-	-	lncRNA	3.1236	1.1114	1.18051	1.16806	0.46183	0.49525
MERGE.19711.7	-5.31308918290895	0.0320327	0.730234	down	14:-:118615176-118706147	MERGE.19711	14:-:118482692-118706219	-	-	-	-	-	-	0	1.59334	0	1.85047	1.00474	2.05465
MERGE.8960.4	-5.55844578340008	0.0463688	0.730234	down	11:-:65002039-65162861	MERGE.8960	11:-:65002039-65162961	-	-	-	-	-	-	2.25322	0	1.17033	9.20295	4.27827	7.12688
MERGE.32606.9	-1.31347058827041	0.0128839	0.604003	down	2:-:64932470-65024987	MERGE.32606	2:-:64912476-65024987	-	-	-	-	-	-	1.38704	1.43006	0.75493	2.3159	2.86426	4.24865
NONMMUT003260.2	2.18655	0.0327776	0.730234	up	1:-:156004614-156007103	MERGE.3032	1:-:156004599-156036480	1:-:156004614-156007103	NONMMUG002117.2	-	-	-	lncRNA	27.1934	26.9094	28.5557	25.7428	2.35496	4.04708
NONMMUT105799.1	-1.28408501877209	0.017408	0.647989	down	19:-:4416241-4417633	MERGE.29115	19:-:4416241-4417633	19:-:4416241-4417633	NONMMUG066129.1	-	-	-	lncRNA	0.60774	0.29639	0.25676	1.0057	0.76087	0.98005
NONMMUT017386.2	3.09956	0.0237312	0.694213	up	13:-:48535523-48537822	MERGE.15271	13:-:48531864-48546510	13:-:48535523-48537822	NONMMUG010915.3	-	-	-	lncRNA	4.53963	11.2854	8.32995	0.28731	5.53588	0.48954
NONMMUT096876.1	1.8037	0.00956334	0.553056	up	15:-:36369371-36370383	NONMMUG060544.1	15:-:36369371-36370383	15:-:36369371-36370383	NONMMUG060544.1	-	-	-	lncRNA	0.60113	0.55773	0.55315	0.20875	0.19024	0.11115
NONMMUT115004.1	1.23831	0.0274651	0.715542	up	4:+:55540824-55541751	MERGE.40801	4:+:55532765-55599297	4:+:55540824-55541751	NONMMUG072106.2	-	-	-	lncRNA	0.99229	0.84297	0.97638	0.48422	0.57848	0.24266
NONMMUT067979.2	-1.28309640405391	0.00605482	0.459623	down	9:+:8950262-8952817	NONMMUG042086.2	9:+:8950262-8952817	9:+:8950262-8952817	NONMMUG042086.2	-	-	-	lncRNA	0.47648	0.44208	0.35449	0.95142	1.16323	1.22793
NONMMUT038250.2	-1.05461677815645	0.0167081	0.642242	down	2:-:84374484-84377769	MERGE.33143	2:-:84330626-84425973	2:-:84374484-84377769	NONMMUG023629.2	-	-	-	lncRNA	13.0443	8.84145	10.2133	14.9419	24.5766	31.0741
ENSMUST00000206881	3.1477	0.0047034	0.413963	up	7:-:126348372-126351597	MERGE.54259	7:-:126334857-126351797	7:-:126348372-126351597	ENSMUSG00000108417	102632993	-	Gm30928	predicted gene, 30928 [Source:MGI Symbol;Acc:MGI:5590087]	0.93169	0.40092	0.92386	0.04877	0.05079	0.05193
NONMMUT051787.2	1.55099	0.0208025	0.674538	up	5:+:31581079-31581709	MERGE.44255	5:+:31581079-31581709	5:+:31581079-31581709	NONMMUG032123.2	-	-	-	lncRNA	0.75321	0.60265	0.83134	0.18851	0.26177	0.31227
MERGE.59252.9	1.68348	0.00281153	0.33312	up	9:-:22055700-22071376	MERGE.59252	9:-:22015005-22071376	-	-	-	-	-	-	1.62172	1.94861	1.99684	0.83582	0.55767	0.49371
NONMMUT019338.2	-2.26219697277789	0.00332422	0.355968	down	13:+:112668371-112670138	MERGE.16873	13:+:112660751-112738749	13:+:112668371-112670138	NONMMUG011984.2	-	-	-	lncRNA	0.42003	0.09218	0.25625	1.02412	1.17562	0.98711
NONMMUT105840.1	-1.59653234775201	0.0156046	0.632225	down	19:-:8469754-8472939	NONMMUG066152.1	19:-:8469754-8472939	19:-:8469754-8472939	NONMMUG066152.1	-	-	-	lncRNA	0.25173	0.08867	0.20955	0.58076	0.3586	0.72006
MERGE.2051.5	1.07131	0.0484805	0.730234	up	1:-:106748362-106759699	MERGE.2051	1:-:106720410-106759727	-	-	-	-	-	-	4.27003	1.49394	1.76123	1.50186	0.92287	1.00759
MERGE.42781.1	1.11964	0.0114508	0.582088	up	4:-:138310448-138312564	MERGE.42781	4:-:138310448-138312564	-	-	-	-	-	-	4.3287	2.05804	3.62113	1.47334	1.78807	1.48921
MERGE.55316.1	-1.17725287740202	0.00780672	0.510171	down	8:+:18693668-18694767	MERGE.55316	8:+:18693668-18694767	-	-	-	-	-	-	1.02616	0.71116	0.71533	1.71813	2.02719	2.11115
NONMMUT079863.1	-1.68517481882735	0.00867531	0.531106	down	10:+:18362508-18363289	MERGE.4636	10:+:18362508-18363289	10:+:18362508-18363289	NONMMUG049690.1	-	-	-	lncRNA	1.42445	0.63912	0.44213	2.75482	1.97144	2.77167
MERGE.39272.1	-6.83864451807475	1.64833e-05	0.0179177	down	3:-:135963218-135963428	MERGE.39272	3:-:135963218-135963428	-	-	-	-	-	-	0	0	0	2.75603	3.26182	5.33624
MERGE.27118.7	8.61321	0.000382822	0.120426	up	18:+:4375604-4397330	MERGE.27118	18:+:4375592-4404626	-	-	-	-	-	-	0.86575	0.40793	0.64009	0	0	0.01645
MERGE.14927.3	4.76871	0.0400835	0.730234	up	13:-:34948081-34994122	MERGE.14927	13:-:34946614-35027096	-	-	-	-	-	-	0.0138	1.55503	0.23268	0	0	0.01308
MERGE.14052.20	-7.7923323032149	0.0199151	0.665464	down	12:-:112934755-113000704	MERGE.14052	12:-:112907495-113000704	-	-	-	-	-	-	0	0	0	4.49211	0.09122	0.06619
MERGE.21029.3	7.83621	0.00816833	0.522659	up	15:-:64699137-64922271	MERGE.21029	15:-:64697084-64922296	-	-	-	-	-	-	2.63498	3.23438	3.74522	0	0	1.58329
MERGE.45515.12	-8.70493432204946	1.89788e-05	0.0195287	down	5:-:99961168-99972500	MERGE.45515	5:-:99955935-99978938	-	-	-	-	-	-	0	0	0	1.331	1.0471	0.45513
NONMMUT030784.2	-1.25975983058821	0.0392107	0.730234	down	17:+:81346433-81354705	MERGE.26835	17:+:81346433-81354705	17:+:81346433-81354705	NONMMUG018989.2	-	-	-	lncRNA	0.32148	0.18814	0.27526	0.49585	0.52636	1.02562
NONMMUT152263.1	1.0787	0.0222312	0.685406	up	8:+:84208505-84209911	MERGE.57082	8:+:84208505-84209911	8:+:84208505-84209911	NONMMUG095569.1	-	-	-	lncRNA	13.4167	9.74529	12.6763	9.38392	4.1187	5.35165
NONMMUT152804.1	1.25385	0.0235129	0.693117	up	8:-:84632719-84635347	MERGE.57092	8:-:84632719-84635347	8:-:84632719-84635347	NONMMUG095838.1	-	-	-	lncRNA	0.65618	0.4154	0.69892	0.25826	0.26898	0.21524
NONMMUT016494.2	-1.39515874775209	0.0266327	0.711563	down	13:+:17725400-17728015	MERGE.14537	13:+:17725400-17728015	13:+:17725400-17728015	NONMMUG010364.2	-	-	-	lncRNA	0.30658	0.61884	0.37371	0.82855	1.38385	1.48491
NONMMUT026065.2	-1.04330336045582	0.0197916	0.664698	down	16:-:26052821-26053974	MERGE.23143	16:-:26052821-26053974	16:-:26052821-26053974	NONMMUG016130.2	-	-	-	lncRNA	1.39648	0.59194	0.95335	1.90465	2.2256	1.94171
MERGE.51547.1	1.70998	0.0201938	0.66777	up	7:+:23326489-23326922	MERGE.51547	7:+:23326489-23326922	-	-	-	-	-	-	3.35374	1.85256	1.31858	0.54815	0.44403	0.97288
NONMMUT046838.2	-1.3486923213634	0.0474481	0.730234	down	4:+:41425415-41427081	MERGE.40365	4:+:41425415-41427081	4:+:41425415-41427081	NONMMUG028961.2	-	-	-	lncRNA	0.2762	0.25419	0.11443	0.45984	0.83399	0.39682
NONMMUT098109.1	-4.48502648377991	0.00299676	0.344161	down	16:+:20892359-20893162	NONMMUG061314.1	16:+:20892359-20893162	16:+:20892359-20893162	NONMMUG061314.1	-	-	-	lncRNA	0.01847	0.05405	0	0.47671	0.41089	0.89278
MERGE.29684.1	-1.15946881935776	0.0242649	0.698557	down	19:+:16557498-16559000	MERGE.29684	19:+:16557498-16559000	-	-	-	-	-	-	1.83801	0.80963	0.99153	2.17196	2.31704	4.07341
NONMMUT079653.1	1.25076	0.0347262	0.730234	up	10:+:3477379-3478349	MERGE.4098	10:+:3477379-3478349	10:+:3477379-3478349	NONMMUG049541.1	-	-	-	lncRNA	1.19308	0.5371	1.08048	0.42194	0.28352	0.46383
MERGE.53855.4	5.16436	0.039656	0.730234	up	7:-:109712203-109723850	MERGE.53855	7:-:109712181-109723850	-	-	-	-	-	-	0.83634	0.84388	2.9516	0	0	1.36644
NONMMUT081293.1	4.57375	0.000375582	0.119149	up	10:-:5209464-5210927	MERGE.4191	10:-:5020203-5551482	10:-:5209464-5210927	NONMMUG050536.1	-	-	-	lncRNA	3.20343	2.92929	2.57144	0.06479	0.13495	0.06899
NONMMUT114401.1	-1.62397807804818	0.0473613	0.730234	down	3:-:149307521-149308606	MERGE.39569	3:-:149307521-149309157	3:-:149307521-149308606	NONMMUG071752.1	-	-	-	lncRNA	0.55922	0.08422	0.13203	0.49763	0.53352	0.65462
NONMMUT077275.1	-1.71707046562127	0.00738164	0.498976	down	1:-:6202331-6203804	MERGE.20	1:-:6196344-6203804	1:-:6202331-6203804	NONMMUG047931.1	-	-	-	lncRNA	0.14107	0.16954	0.16985	0.52901	0.51362	0.66839
NONMMUT034455.2	-4.03204737805843	0.000853427	0.194352	down	19:-:32201479-32203370	MERGE.30045	19:-:32117167-32389714	19:-:32201479-32203370	NONMMUG021200.2	-	-	-	lncRNA	0.3297	0.18951	0.12603	5.00155	1.6806	4.80551
NONMMUT004392.2	1.20824	0.00680392	0.47986	up	1:+:191817381-191820331	MERGE.4023	1:+:191817381-191820331	1:+:191817381-191820331	NONMMUG002843.2	-	-	-	lncRNA	2.86767	3.69432	2.73839	1.49132	1.47037	1.33403
NONMMUT123064.1	1.89549	0.0122507	0.593636	up	6:+:127845054-127847524	MERGE.50522	6:+:127845054-127847524	6:+:127845054-127847524	NONMMUG077185.1	-	-	-	lncRNA	2.7709	0.66834	0.91672	0.31022	0.3788	0.33036
MERGE.48653.1	1.42656	0.0284095	0.721601	up	6:-:52201754-52208722	MERGE.48653	6:-:52201754-52208722	-	-	-	-	-	-	2.56937	1.15705	4.4919	1.02441	0.81334	1.01502
MERGE.54695.3	1.28643	0.0113695	0.581054	up	7:-:132562033-132574158	MERGE.54695	7:-:132557478-132576398	-	-	-	-	-	-	5.3683	6.15247	3.07559	2.12624	2.10717	1.9351
NONMMUT086570.1	-1.63577815279986	0.0135099	0.609977	down	12:+:25387630-25388770	NONMMUG053910.1	12:+:25387630-25390786	12:+:25387630-25388770	NONMMUG053910.1	-	-	-	lncRNA	0.55973	0.14284	0.22987	0.78766	0.89273	0.82645
NONMMUT011213.2	1.67267	0.0177545	0.650528	up	11:+:85140251-85141630	MERGE.9845	11:+:85140177-85141630	11:+:85140251-85141630	NONMMUG007076.2	-	-	-	lncRNA	0.85024	0.39366	0.34557	0.17239	0.15959	0.12239
MERGE.55341.1	-7.1834294882222	6.88274e-05	0.0419168	down	8:+:21015602-21016524	MERGE.55341	8:+:21015602-21016524	-	-	-	-	-	-	0	0.01177	0	0.91641	1.37201	2.34827
NONMMUT112589.1	3.28853	0.00267299	0.324101	up	3:-:9392773-9394250	MERGE.36105	3:-:9392773-9610085	3:-:9392773-9394250	NONMMUG070490.1	-	-	-	lncRNA	1.48724	0.67631	0.96797	0.12519	0.03725	0.21902
NONMMUT038697.2	-2.36100841882738	0.00971639	0.556654	down	2:-:94327817-94330700	MERGE.33400	2:-:94300767-94406689	2:-:94327817-94330700	NONMMUG023889.2	-	-	-	lncRNA	0.73216	0.19129	1.28737	2.6681	2.66573	4.06372
MERGE.2394.12	-1.19671120193895	0.0438835	0.730234	down	1:-:125914743-126492927	MERGE.2394	1:-:125913620-126830799	-	-	-	-	-	-	1.79513	0.5663	0.66888	2.67761	1.36576	2.7052
MERGE.46767.1	-1.11635943152575	0.0234755	0.693117	down	5:-:135513385-135514942	MERGE.46767	5:-:135513385-135514942	-	-	-	-	-	-	2.26883	0.71829	1.07131	2.94358	2.86253	2.54747
MERGE.7901.6	-1.44830535621954	0.0209859	0.675806	down	11:-:23490321-23497801	MERGE.7901	11:-:23487595-23498030	-	-	-	-	-	-	1.01435	0.61836	0.33527	2.62381	1.48386	1.31932
NONMMUT086411.1	-4.67308194239489	0.00449332	0.408214	down	12:+:18010401-18012284	MERGE.11716	12:+:18010401-18012284	12:+:18010401-18012284	NONMMUG053799.1	-	-	-	lncRNA	0	0.0692	0.08859	0.82778	0.79638	0.99357
MERGE.7731.1	1.81788	0.00350124	0.365194	up	11:-:18835684-19016289	MERGE.7731	11:-:18835684-19018985	-	-	-	-	-	-	0.9784	0.36782	0.89744	0.20213	0.2171	0.20853
MERGE.49657.2	7.065	0.0181759	0.654393	up	6:+:92940303-93244204	MERGE.49657	6:+:92940239-93273001	-	-	-	-	-	-	1.44809	0.43744	1.38394	0	0.77524	0
MERGE.42970.1	1.52629	0.0327632	0.730234	up	4:-:143981246-143981583	MERGE.42970	4:-:143981246-143981583	-	-	-	-	-	-	1.23037	1.09293	1.69308	0.31281	0.73304	0.4164
NONMMUT085987.1	1.51928	0.00855875	0.530055	up	11:-:116529215-116533077	MERGE.11135	11:-:116529215-116533105	11:-:116529215-116533077	NONMMUG008150.2	-	-	-	lncRNA	2.59818	1.30493	1.49416	0.48311	0.64691	0.7717
NONMMUT032830.2	-1.77922519181348	0.00775279	0.508781	down	18:+:67857693-67860990	MERGE.28659	18:+:67800107-67885170	18:+:67857693-67860990	NONMMUG020196.2	-	-	-	lncRNA	0.29723	0.14495	0.31812	0.5971	0.8723	1.30587
MERGE.31850.1	-1.33713810949169	0.0072843	0.495425	down	2:+:30373141-30375184	MERGE.31850	2:+:30373141-30375184	-	-	-	-	-	-	0.72663	0.71228	0.50745	2.07557	1.91254	1.33582
MERGE.12438.4	-2.05299706029273	0.0360807	0.730234	down	12:-:55602902-55820767	MERGE.12438	12:-:55602896-55821167	-	-	-	-	-	-	5.91532	0.46081	1.87359	6.48245	7.00168	9.27897
NONMMUT049529.2	-2.1531738215865	0.0328693	0.730234	down	4:+:127043988-127045685	MERGE.42305	4:+:127043988-127045685	4:+:127043988-127045685	NONMMUG030663.2	-	-	-	lncRNA	0.10496	0.45431	0.1334	1.85248	0.68095	0.62995
MERGE.23971.7	6.20713	0.0186822	0.657683	up	16:-:78364051-78375033	MERGE.23971	16:-:78348589-78377369	-	-	-	-	-	-	3.77473	1.05347	3.08875	0	0.04068	1.12104
MERGE.23971.3	8.03297	0.000637395	0.162906	up	16:-:78357030-78376341	MERGE.23971	16:-:78348589-78377369	-	-	-	-	-	-	3.23982	1.73071	2.15014	0.12986	0.00232	0.00158
MERGE.19912.1	-1.40526453783308	0.0199617	0.665748	down	15:+:6404951-6405581	MERGE.19912	15:+:6404951-6405581	-	-	-	-	-	-	2.44792	1.15365	2.00277	3.53973	4.34106	8.40892
MERGE.60844.2	2.43554	0.0246384	0.699287	up	9:-:76951693-77045794	MERGE.60844	9:-:76951693-77045794	-	-	-	-	-	-	0.6884	0.53507	0.5595	0.03063	0.4785	0.0897
MERGE.50843.5	3.70305	0.00452965	0.409559	up	6:-:142490336-142508042	MERGE.50843	6:-:142490249-142508042	-	-	-	-	-	-	1.4559	0.83877	1.6524	0.50303	0.03954	0.04548
NONMMUT115253.1	-1.36902774856744	0.0435893	0.730234	down	4:+:85924749-85925640	MERGE.41317	4:+:85924749-85925640	4:+:85924749-85925640	NONMMUG072283.1	-	-	-	lncRNA	0.36631	0.14617	0.28068	0.68156	0.44751	0.91515
NONMMUT043463.2	1.31552	0.0185197	0.656587	up	3:+:69753233-69756373	MERGE.37422	3:+:69721985-69756373	3:+:69753233-69756373	NONMMUG026845.2	-	-	-	lncRNA	1.00718	0.65723	0.92234	0.51334	0.46891	0.19268
MERGE.48749.1	14.2458	2.46681e-08	0.00344305	up	6:-:55170626-55175014	MERGE.48749	6:-:55170626-55175043	-	-	-	-	-	-	127.761	138.933	135.504	0	0	0
NONMMUT101897.1	-1.56905522572271	0.0251153	0.702508	down	17:-:22784799-22817742	MERGE.25010	17:-:22752242-22817800	17:-:22784799-22817742	NONMMUG017678.2	-	-	-	lncRNA	1.51341	0.34359	0.45242	1.42102	1.7992	2.71003
MERGE.19491.1	-1.1935457855981	0.00364354	0.370516	down	14:-:98143241-98153395	MERGE.19491	14:-:98143241-98153395	-	-	-	-	-	-	4.0118	2.40838	2.27172	6.08436	6.27993	7.73223
NONMMUT103357.1	3.80702	0.0375012	0.730234	up	18:+:36333624-36335211	MERGE.27846	18:+:36333624-36335211	18:+:36333624-36335211	NONMMUG064625.1	-	-	-	lncRNA	1.44034	0.30105	0.46547	0.06658	0	0.24816
NONMMUT078705.1	-2.42523816941001	0.00795284	0.514505	down	1:-:124642925-124643705	MERGE.2238	1:-:124642925-124643705	1:-:124642925-124643705	NONMMUG048944.1	-	-	-	lncRNA	0.17115	0.08347	0.15265	0.49075	1.02223	0.81094
MERGE.45339.5	-3.80184137650146	0.0466815	0.730234	down	5:-:91951854-91962726	MERGE.45339	5:-:91948904-91979170	-	-	-	-	-	-	0	0	0	1.13761	0	0.60573
MERGE.60995.2	1.41615	0.00150002	0.244724	up	9:-:86581381-86650975	MERGE.60995	9:-:86581371-86695953	-	-	-	-	-	-	1.14409	1.08918	1.04418	0.51136	0.41396	0.40099
NONMMUT008692.2	-1.6640217585874	0.00301307	0.344764	down	11:-:18465228-18466585	MERGE.7705	11:-:18465228-18466585	11:-:18465228-18466585	NONMMUG005374.2	-	-	-	lncRNA	0.51403	0.32803	0.35117	1.18733	1.16566	1.63752
MERGE.8421.4	10.354	0.0076823	0.507406	up	11:-:51692264-51756431	MERGE.8421	11:-:51692264-51763634	-	-	-	-	-	-	0.13404	4.16125	4.00173	0	0	0
MERGE.28881.1	-1.04076115363473	0.0143857	0.622026	down	18:-:79015391-79016927	MERGE.28881	18:-:79015391-79016927	-	-	-	-	-	-	2.76367	1.57638	1.4893	3.39654	4.29873	4.89901
MERGE.40701.2	4.79609	7.65098e-05	0.0445633	up	4:-:48194490-48209147	MERGE.40701	4:-:48193323-48279558	-	-	-	-	-	-	4.19002	3.4695	4.10763	0.15866	0.08262	0.20275
MERGE.7227.6	6.10039	0.0398404	0.730234	up	10:+:128068953-128077436	MERGE.7227	10:+:128058953-128077436	-	-	-	-	-	-	1.2387	1.62131	1.13324	3.74447	0	0
MERGE.35177.3	-1.16512472503465	0.0487508	0.730234	down	2:-:157097533-157110611	MERGE.35177	2:-:157097533-157135265	-	-	-	-	-	-	2.55603	0.87225	0.60958	2.56499	2.89889	2.49235
MERGE.42011.1	-1.13049529805227	0.00808282	0.520214	down	4:-:118096803-118099476	MERGE.42011	4:-:118096803-118099476	-	-	-	-	-	-	1.22195	0.91828	0.67324	2.34277	1.987	2.12115
MERGE.64315.2	-6.77831447019985	0.0250067	0.702016	down	X:-:164192894-164258163	MERGE.64315	X:-:164192842-164258193	-	-	-	-	-	-	0	0	3.37497	3.45573	3.19883	1.64476
MERGE.1261.1	-1.3457667853203	0.0396012	0.730234	down	1:-:69616896-69617992	MERGE.1261	1:-:69616896-69617992	-	-	-	-	-	-	0.81234	0.32684	0.8477	1.14454	1.44299	2.68144
NONMMUT012450.2	-1.24925977488693	0.042779	0.730234	down	11:-:107364461-107367214	MERGE.10778	11:-:107364461-107367214	11:-:107364461-107367214	NONMMUG007891.2	-	-	-	lncRNA	0.98692	0.19726	0.38528	1.03658	0.97964	1.13453
NONMMUT118237.1	1.06921	0.0302245	0.730234	up	5:+:34359339-34360072	MERGE.44401	5:+:34359339-34360072	5:+:34359339-34360072	NONMMUG074212.1	-	-	-	lncRNA	3.27803	1.62827	3.06987	1.35045	0.97517	1.61069
NONMMUT053093.2	-4.3686134404306	0.0299318	0.730201	down	5:-:92052164-92053664	MERGE.45350	5:-:92052146-92083719	5:-:92052164-92053664	NONMMUG032975.2	-	-	-	lncRNA	0.28695	0.1882	24.3764	22.0743	23.5956	27.4548
MERGE.53894.1	1.74166	0.0481332	0.730234	up	7:-:110844722-110862953	MERGE.53894	7:-:110844722-110863239	-	-	-	-	-	-	0.66894	0.26144	0.59876	0.06523	0.12739	0.43244
NONMMUT051323.2	-1.06008541954805	0.00171905	0.264749	down	5:+:17597709-17600470	MERGE.43791	5:+:17597709-17600470	5:+:17597709-17600470	NONMMUG031824.2	-	-	-	lncRNA	9.66326	8.57385	8.48828	17.8096	18.2605	21.8147
MERGE.22091.8	9.87897	2.00851e-06	0.00636482	up	15:-:97745368-97767587	MERGE.22091	15:-:97744770-97767972	-	-	-	-	-	-	1.53172	2.09424	2.29801	0	0	0
NONMMUT142605.1	1.03935	0.0086562	0.530958	up	13:-:17982603-17984458	MERGE.14514	13:-:17960852-17993349	13:-:17982603-17984458	NONMMUG089804.1	-	-	-	lncRNA	3.03288	2.44111	2.01058	1.33161	1.19404	1.33464
MERGE.12246.1	-1.71484928915563	0.0126139	0.600825	down	12:-:43958416-43959041	MERGE.12246	12:-:43958416-43959041	-	-	-	-	-	-	0.47451	0.41655	0.22854	0.97117	1.45125	1.34898
MERGE.144.1	-2.31040854727012	0.00124871	0.223845	down	1:-:9590834-9591737	MERGE.144	1:-:9590834-9591737	-	-	-	-	-	-	0.52574	0.33653	0.36927	1.62281	2.10128	2.80241
NONMMUT121358.1	-1.71469707633209	0.0399715	0.730234	down	5:-:124300484-124301827	MERGE.46473	5:-:124300484-124301827	5:-:124300484-124301827	NONMMUG076108.1	-	-	-	lncRNA	0.08841	0.21019	0.14193	0.66869	0.28677	0.67021
MERGE.50869.1	-1.60731951539618	0.0105193	0.570313	down	6:+:145161984-145163861	MERGE.50869	6:+:145161984-145163861	-	-	-	-	-	-	0.60896	0.24299	0.80624	1.66085	1.77375	1.35647
NONMMUT058649.2	-1.86637368361233	0.0238571	0.694563	down	6:-:120324329-120325199	MERGE.50242	6:-:120324323-120364374	6:-:120324329-120325199	NONMMUG036453.2	-	-	-	lncRNA	1.90982	0.37423	0.50645	1.5629	3.44517	3.5711
MERGE.3323.6	-1.73439674073569	0.0469968	0.730234	down	1:-:165871491-166002629	MERGE.3323	1:-:165865154-166002678	-	-	-	-	-	-	0.86279	0.60192	1.05891	5.18903	4.54301	1.01489
NONMMUT038153.2	-1.21162001829221	0.0457809	0.730234	down	2:+:79318259-79320264	MERGE.33075	2:+:79255426-79333123	2:+:79318259-79320264	NONMMUG023561.2	-	-	-	lncRNA	0.96251	1.39198	2.63286	3.28763	3.24566	5.31822
MERGE.15290.1	-1.52338828125918	0.00780134	0.510171	down	13:-:49271513-49272227	MERGE.15290	13:-:49271513-49272227	-	-	-	-	-	-	0.43622	0.30392	0.48356	1.14604	1.1936	1.29917
MERGE.26837.1	-1.44889605626257	0.00465263	0.413963	down	17:+:81360788-81365218	MERGE.26837	17:+:81360788-81365218	-	-	-	-	-	-	1.02568	0.6032	0.67804	1.5182	2.65916	2.6713
NONMMUT003291.2	-3.56203857401669	0.0281804	0.719555	down	1:+:156648006-156649564	MERGE.3048	1:+:156558786-156649568	1:+:156648006-156649564	NONMMUG002138.2	-	-	-	lncRNA	0.01905	0.34846	0.01529	0.37301	0.90942	0.85764
MERGE.2373.1	-1.09742211840761	0.0212651	0.677204	down	1:-:127534222-127535342	MERGE.2373	1:-:127534222-127535342	-	-	-	-	-	-	1.15268	0.77538	1.34004	2.07501	2.14884	3.28945
MERGE.25937.1	1.55557	0.00224976	0.300023	up	17:-:45567774-45573271	MERGE.25937	17:-:45567774-45573271	-	-	-	-	-	-	72.1111	65.5348	110.179	24.2519	22.4082	39.3032
NONMMUT038442.2	1.9798	0.0156089	0.632225	up	2:+:91070064-91071622	MERGE.33256	2:+:91070064-91071623	2:+:91070064-91071622	NONMMUG023756.2	-	-	-	lncRNA	0.51445	0.62026	0.36707	0.14412	0.07063	0.19861
NONMMUT093333.1	1.8037	0.0188911	0.657955	up	14:+:78737221-78738261	NONMMUG058195.1	14:+:78737221-78738261	14:+:78737221-78738261	NONMMUG058195.1	-	-	-	lncRNA	1.78342	0.6471	1.30559	0.19044	0.60825	0.32448
NONMMUT117996.1	2.16279	0.049285	0.730234	up	5:+:20965362-20966672	NONMMUG074044.1	5:+:20965362-20966672	5:+:20965362-20966672	NONMMUG074044.1	-	-	-	lncRNA	0.96296	0.4641	0.21825	0.22179	0.105	0.04294
NONMMUT114395.1	-1.45764142899445	0.00643627	0.471725	down	3:-:149287559-149288189	MERGE.39562	3:-:149287559-149288189	3:-:149287559-149288189	NONMMUG071747.1	-	-	-	lncRNA	0.84736	0.56822	0.83134	2.09452	1.85422	2.60966
MERGE.18386.8	-5.79321589502383	0.0170729	0.645614	down	14:+:50870375-50880404	MERGE.18386	14:+:50870324-50880603	-	-	-	-	-	-	0	0.00555	0	0.02701	0.85811	0.66165
MERGE.18623.2	5.73654	0.0214454	0.679015	up	14:-:54916558-54925655	MERGE.18623	14:-:54916535-54926126	-	-	-	-	-	-	0.96969	1.36037	0.73405	0	1.04659	0
MERGE.31554.1	1.57937	0.0192729	0.660203	up	2:-:25130009-25133498	MERGE.31554	2:-:25130009-25133498	-	-	-	-	-	-	3.44709	1.03046	1.04532	0.68922	0.59161	0.41134
MERGE.42869.1	1.00305	0.0355739	0.730234	up	4:-:141205868-141206480	MERGE.42869	4:-:141205868-141206480	-	-	-	-	-	-	2.66517	1.45339	2.87843	1.37985	1.12275	1.03319
NONMMUT004137.2	-1.46623719321971	0.0490709	0.730234	down	1:-:182379064-182382317	MERGE.3812	1:-:182379064-182382317	1:-:182379064-182382317	NONMMUG002676.2	-	-	-	lncRNA	0.93476	0.68381	0.22232	1.81764	1.44387	1.27949
NONMMUT039698.2	-1.11895214055244	0.0427466	0.730234	down	2:-:127575535-127577416	MERGE.34180	2:-:127574662-127587094	2:-:127575535-127577416	NONMMUG024563.2	-	-	-	lncRNA	0.87599	0.25402	0.34208	0.79355	1.00933	1.09932
NONMMUT139364.1	-2.16175891768904	0.0131232	0.604826	down	10:+:18372492-18372819	MERGE.4639	10:+:18372492-18372819	10:+:18372492-18372819	NONMMUG088048.1	-	-	-	lncRNA	0.86035	0.1325	0.36348	1.53117	1.67864	1.54474
MERGE.29691.1	-1.10947475459569	0.00601843	0.458723	down	19:-:16614897-16743038	MERGE.29691	19:-:16614897-16780933	-	-	-	-	-	-	2.88845	1.75421	1.62598	5.17284	4.53548	3.94955
NONMMUT008713.2	-1.1253279777725	0.0107687	0.573781	down	11:-:18921787-18923439	MERGE.7740	11:-:18921787-18923439	11:-:18921787-18923439	NONMMUG005388.2	-	-	-	lncRNA	4.03429	1.84041	2.25749	4.95715	6.22876	7.084
NONMMUT005626.2	-1.67996512694916	0.00242388	0.309119	down	10:-:53656648-53660217	MERGE.5368	10:-:53656648-53660217	10:-:53656648-53660217	NONMMUG003644.2	-	-	-	lncRNA	0.54084	0.33478	0.52431	1.16615	1.64639	2.06187
NONMMUT122081.1	-3.84774289233321	0.00666397	0.47719	down	6:+:39608662-39614376	MERGE.48255	6:+:39608662-39614376	6:+:39608662-39614376	NONMMUG076548.1	-	-	-	lncRNA	0.161	0	0	0.68052	0.52224	0.49584
NONMMUT104713.1	1.8194	0.0100239	0.561963	up	18:-:62141402-62142033	MERGE.28521	18:-:62141402-62142033	18:-:62141402-62142033	NONMMUG065513.1	-	-	-	lncRNA	3.33706	1.27217	1.84869	0.58554	0.89297	0.35631
MERGE.18938.1	-1.00450866654966	0.0171993	0.646631	down	14:-:63172830-63175919	MERGE.18938	14:-:63172830-63175919	-	-	-	-	-	-	1.16319	0.52391	0.7678	1.51411	1.56358	2.00867
MERGE.642.1	-1.45218756441242	0.0428983	0.730234	down	1:+:40263167-40263867	MERGE.642	1:+:40263167-40263867	-	-	-	-	-	-	2.18229	0.38748	0.54423	1.73453	2.25815	2.52977
NONMMUT051326.2	1.0172	0.0270151	0.71327	up	5:-:17871382-17872500	MERGE.43795	5:-:17871382-17872500	5:-:17871382-17872500	NONMMUG031826.2	-	-	-	lncRNA	7.04787	3.29154	4.4748	1.8425	2.75544	3.13182
NONMMUT069618.2	1.52071	0.040901	0.730234	up	9:+:65686177-65690295	MERGE.60541	9:+:65668001-65710733	9:+:65686177-65690295	NONMMUG043118.2	-	-	-	lncRNA	0.87929	0.35657	0.4373	0.13608	0.11515	0.37133
NONMMUT148868.1	-1.19090016679289	0.0131149	0.604826	down	5:+:9167444-9167704	MERGE.43708	5:+:9167444-9167704	5:+:9167444-9167704	NONMMUG093612.1	-	-	-	lncRNA	3.86956	2.16467	2.87776	7.64627	5.43212	8.3044
MERGE.61012.5	-6.91491517695269	6.79281e-05	0.0418958	down	9:+:88548108-88554539	MERGE.61012	9:+:88548020-88571061	-	-	-	-	-	-	0	0	0	2.44677	0.88288	0.71808
MERGE.47139.3	-4.4251729381442	0.0264819	0.709771	down	5:-:143505482-143527685	MERGE.47139	5:-:143503634-143528036	-	-	-	-	-	-	0.73069	0.18849	31.1914	29.1842	33.4463	46.9789
MERGE.18399.1	1.56938	0.0290599	0.724915	up	14:-:50911350-50913266	MERGE.18399	14:-:50911350-50913266	-	-	-	-	-	-	3.68014	0.91817	1.06348	0.51018	0.45955	0.70482
MERGE.24176.1	-2.96462977750358	0.00256286	0.317118	down	16:-:90678216-90678971	MERGE.24176	16:-:90678216-90678971	-	-	-	-	-	-	0.43221	0.2012	0.22078	1.41604	2.11207	3.57444
NONMMUT148585.1	3.08051	0.0256269	0.705875	up	4:-:106657051-106657298	MERGE.41684	4:-:106657051-106657298	4:-:106657051-106657298	NONMMUG093451.1	-	-	-	lncRNA	1.55709	0.4381	0.7211	0	0.33302	0.05675
NONMMUT015950.2	-1.04221989135441	0.0198712	0.665464	down	12:+:111091200-111093941	MERGE.13946	12:+:111039351-111115947	12:+:111091200-111093941	NONMMUG010021.2	-	-	-	lncRNA	2.1558	0.99853	1.42179	2.39071	3.89051	3.62894
MERGE.48302.1	1.33768	0.0128896	0.604003	up	6:-:41630985-41633174	MERGE.48302	6:-:41630985-41633174	-	-	-	-	-	-	3.24851	1.16588	1.66039	0.92937	0.65367	0.78405
NONMMUT005497.2	-1.67315283078161	0.0193471	0.660428	down	10:+:44715558-44719105	NONMMUG003543.2	10:+:44715558-44719105	10:+:44715558-44719105	NONMMUG003543.2	-	-	-	lncRNA	0.10338	0.24369	0.18441	0.41908	0.64939	0.76195
MERGE.18925.1	-1.06386816620743	0.0474789	0.730234	down	14:+:62896441-62897628	MERGE.18925	14:+:62896441-62897628	-	-	-	-	-	-	1.2752	0.48472	0.74262	1.15699	2.12035	2.01401
MERGE.38966.11	-8.54559855979881	0.0169556	0.644318	down	3:-:122539626-122619594	MERGE.38966	3:-:122533822-122619715	-	-	-	-	-	-	0	0	12.649	15.0814	14.5501	9.23121
MERGE.61980.1	-1.03066151825777	0.02071	0.673178	down	9:+:118959897-118972210	MERGE.61980	9:+:118959897-118972210	-	-	-	-	-	-	8.59436	3.39147	5.62365	10.0323	11.718	12.7184
MERGE.58685.9	7.01467	0.0150385	0.627717	up	9:-:14544974-14615006	MERGE.58685	9:-:14541966-14645056	-	-	-	-	-	-	3.98613	2.55944	5.53499	0.00681	2.96347	0
NONMMUT115244.1	-1.48445990353514	0.0130248	0.604811	down	4:+:85889129-85890434	MERGE.41306	4:+:85889129-85890434	4:+:85889129-85890434	NONMMUG072274.1	-	-	-	lncRNA	0.93253	0.59067	0.31038	1.50784	1.85499	1.55184
NONMMUT065965.2	3.22894	0.0351533	0.730234	up	8:+:70001552-70011057	MERGE.56549	8:+:70001552-70011057	8:+:70001552-70011057	NONMMUG040818.2	-	-	-	lncRNA	1.05529	0.68621	0.73729	0	0.36223	0.22223
MERGE.10635.4	7.81514	0.0025612	0.317118	up	11:-:103676855-103697454	MERGE.10635	11:-:103676849-103697898	-	-	-	-	-	-	3.95725	8.48575	7.31898	0.49281	0.01866	0
MERGE.10635.3	7.09509	0.0226227	0.688608	up	11:-:103676855-103697439	MERGE.10635	11:-:103676849-103697898	-	-	-	-	-	-	3.07572	4.41876	5.30605	5.7231	0	0
NONMMUT144606.1	1.05948	0.0147731	0.625329	up	16:-:31244110-31248546	MERGE.23210	16:-:31236584-31275283	16:-:31244110-31248546	NONMMUG091070.1	-	-	-	lncRNA	4.17082	1.79737	2.71385	1.39998	1.41465	1.42742
NONMMUT031169.2	1.01352	0.0332593	0.730234	up	17:-:94777911-94781776	MERGE.27079	17:-:94777911-94781776	17:-:94777911-94781776	NONMMUG019195.2	-	-	-	lncRNA	1.1218	0.46372	0.62294	0.29742	0.46286	0.34949
NONMMUT089908.1	1.47987	0.00541443	0.436157	up	13:+:55186886-55188831	MERGE.15459	13:+:55184771-55188831	13:+:55186886-55188831	NONMMUG011058.2	-	-	-	lncRNA	19.7751	15.795	13.4599	3.74895	8.20517	7.42772
MERGE.40393.1	-1.11006917373259	0.0176514	0.650254	down	4:+:42694768-42700811	MERGE.40393	4:+:42694768-42700811	-	-	-	-	-	-	1.70049	0.57705	0.88568	2.29822	2.14535	2.1703
NONMMUT066467.2	-1.48683866454047	0.0346749	0.730234	down	8:-:85675086-85675811	MERGE.57171	8:-:85675086-85675811	8:-:85675086-85675811	NONMMUG041146.2	-	-	-	lncRNA	0.16366	0.16462	0.24633	0.56434	0.43608	0.73667
MERGE.41561.1	-1.59874944271869	0.0240625	0.697008	down	4:+:100877798-100878263	MERGE.41561	4:+:100877798-100878263	-	-	-	-	-	-	2.10354	0.67615	0.92102	2.43908	2.9243	5.79887
NONMMUT027420.2	1.16758	0.0430896	0.730234	up	16:+:78346929-78349433	MERGE.23970	16:+:78346929-78349433	16:+:78346929-78349433	NONMMUG016996.2	-	-	-	lncRNA	1.4289	0.54217	0.73294	0.35349	0.27475	0.62365
NONMMUT068701.2	-1.34798687595927	0.0213715	0.677632	down	9:-:41109527-41112081	MERGE.59646	9:-:41109527-41112081	9:-:41109527-41112081	NONMMUG042536.2	-	-	-	lncRNA	0.76151	0.28066	0.3033	0.7966	1.05594	1.50383
MERGE.25752.8	5.08551	0.0276742	0.716254	up	17:-:35681575-35701964	MERGE.25752	17:-:35681567-35704621	-	-	-	-	-	-	1.81808	0.73369	1.18997	0.01778	1.35538	0
MERGE.44203.5	4.64365	0.0451263	0.730234	up	5:-:30955043-30960252	MERGE.44203	5:-:30950853-30960361	-	-	-	-	-	-	1.33781	3.14976	1.49613	0.06935	2.25101	0
NONMMUT020670.2	-1.33338035876705	0.049164	0.730234	down	14:+:48513541-48515456	MERGE.18340	14:+:48446124-48572782	14:+:48513541-48515456	NONMMUG012860.2	-	-	-	lncRNA	0.50386	0.41396	0.45424	1.21403	0.65376	2.40939
MERGE.4191.10	-5.75575834415469	6.96329e-06	0.0102512	down	10:-:5161506-5210927	MERGE.4191	10:-:5020203-5551482	-	-	-	-	-	-	0.41293	0.13425	0.21045	9.40779	15.3746	13.9377
MERGE.48823.1	-1.02693533388484	0.0134407	0.60923	down	6:-:59014966-59017210	MERGE.48823	6:-:59014966-59017210	-	-	-	-	-	-	13.1984	5.88501	7.83834	19.857	16.5301	17.9362
NONMMUT084976.1	2.06368	0.032605	0.730234	up	11:-:23541320-23543614	NONMMUG052935.1	11:-:23541320-23543614	11:-:23541320-23543614	NONMMUG052935.1	-	-	-	lncRNA	1.06781	0.30772	0.26494	0.05759	0.10796	0.19011
MERGE.506.13	1.86223	0.0418281	0.730234	up	1:-:36162226-36244305	MERGE.506	1:-:36140027-36244720	-	-	-	-	-	-	1.55678	0.86005	0.26551	0.30074	0.15994	0.17716
NONMMUT111664.1	1.21643	0.0344751	0.730234	up	3:+:95722543-95723209	MERGE.38140	3:+:95722543-95723209	3:+:95722543-95723209	NONMMUG069893.1	-	-	-	lncRNA	1.31377	0.73302	0.73285	0.39629	0.30956	0.46422
NONMMUT069357.2	-4.57097247401377	4.01305e-06	0.00789798	down	9:-:59390105-59392736	MERGE.60279	9:-:59388258-59486618	9:-:59390105-59392736	NONMMUG042956.2	-	-	-	lncRNA	2.05968	0.90817	1.82999	32.564	36.3943	45.1534
NONMMUT070901.2	5.19096	0.0341172	0.730234	up	9:-:107562850-107568415	MERGE.61574	9:-:107557461-107568494	9:-:107562850-107568415	NONMMUG043911.2	-	-	-	lncRNA	0.7332	1.14521	1.55887	1.62229	0	0
MERGE.48102.1	3.21403	0.0266528	0.711563	up	6:-:35021813-35133729	MERGE.48102	6:-:35021813-35133758	-	-	-	-	-	-	0.99774	0.87684	1.33573	0.02979	0.05585	1.07556
NONMMUT023662.2	1.37566	0.0192046	0.660096	up	15:+:60822953-60825609	MERGE.20970	15:+:60819238-60831794	15:+:60822953-60825609	NONMMUG014632.2	-	-	-	lncRNA	2.49308	2.14683	2.64288	0.53224	1.34696	1.43021
MERGE.54267.4	-2.45855645451028	0.0188627	0.657955	down	7:-:126409362-126414550	MERGE.54267	7:-:126408450-126414889	-	-	-	-	-	-	0.12711	0.42201	0.82411	3.90662	1.78064	1.44542
NONMMUT023268.2	1.45175	0.00829295	0.524359	up	15:+:38949117-38951257	MERGE.20623	15:+:38933144-38952912	15:+:38949117-38951257	NONMMUG014385.2	-	-	-	lncRNA	0.79776	0.85255	0.76845	0.23457	0.33432	0.39442
MERGE.51716.4	-4.45362886082283	0.0193354	0.660428	down	7:-:27664135-27674581	MERGE.51716	7:-:27655448-27674598	-	-	-	-	-	-	0	0.07748	0.44008	1.92924	0.97001	1.18073
MERGE.7258.13	-5.30364397446491	0.0305012	0.730234	down	10:-:127281958-127288853	MERGE.7258	10:-:127281922-127311786	-	-	-	-	-	-	0	0.62742	0	0.58733	0.45796	0.71576
MERGE.33524.1	-1.01928299287678	0.0221147	0.685038	down	2:+:103616328-103617100	MERGE.33524	2:+:103616328-103617100	-	-	-	-	-	-	1.19126	0.73089	0.74031	1.94912	2.11904	1.51122
MERGE.54341.5	-7.32015779122032	0.00692925	0.484495	down	7:-:127214569-127216715	MERGE.54341	7:-:127214447-127233130	-	-	-	-	-	-	0	0	0	2.27754	0.17314	6.05462
MERGE.53147.2	-6.65694758754133	0.0396013	0.730234	down	7:-:80325295-80340206	MERGE.53147	7:-:80325292-80341466	-	-	-	-	-	-	0	0	3.37335	6.61233	2.57071	1.10766
NONMMUT015747.2	1.70228	0.0187868	0.657955	up	12:+:109596910-109598539	MERGE.13871	12:+:109595805-109598539	12:+:109596910-109598539	NONMMUG009966.2	-	-	-	lncRNA	0.8474	0.62657	0.54125	0.31622	0.3209	0.08635
NONMMUT000925.2	-6.49843734583437	0.0462672	0.730234	down	1:-:53806882-53809630	MERGE.867	1:-:53806876-54195168	1:-:53806882-53809630	NONMMUG000624.2	-	-	-	lncRNA	0.01081	0.0079	0.00867	0.34135	6.18393	0.47102
MERGE.40880.1	-1.00911129700282	0.0314377	0.730234	down	4:+:61956090-61956445	MERGE.40880	4:+:61956090-61956445	-	-	-	-	-	-	1.37676	0.97663	1.07165	2.45023	2.78391	1.97673
MERGE.2872.9	-1.89451846000876	0.0461754	0.730234	down	1:-:150563711-150993051	MERGE.2872	1:-:150562515-150993435	-	-	-	-	-	-	1.26018	8.86962	5.52185	18.3395	22.948	7.89592
MERGE.23969.1	1.13567	0.0394809	0.730234	up	16:-:78345061-78347992	MERGE.23969	16:-:78345061-78347992	-	-	-	-	-	-	4.3716	1.38221	2.13883	0.92407	1.061	1.57928
MERGE.31236.2	-6.66091686808126	0.0178663	0.651314	down	2:-:13076955-13271311	MERGE.31236	2:-:13076821-13271415	-	-	-	-	-	-	0	1.88169	0	8.40869	2.60336	3.98773
NONMMUT049315.2	-3.54413513581132	0.000880017	0.197871	down	4:-:123629913-123632135	MERGE.42214	4:-:123626612-123654728	4:-:123629913-123632135	NONMMUG030539.2	-	-	-	lncRNA	0.17371	0.48387	0.10726	2.94292	2.96598	2.25392
NONMMUT002461.2	-1.09192401648423	0.0198501	0.665359	down	1:-:127664983-127667067	MERGE.2386	1:-:127664983-127667067	1:-:127664983-127667067	NONMMUG001661.2	-	-	-	lncRNA	1.5529	1.037	0.84055	3.56874	2.1324	2.11284
MERGE.54547.4	-4.09196195552719	0.0297864	0.729222	down	7:-:135692985-135715216	MERGE.54547	7:-:135689784-135716361	-	-	-	-	-	-	0.03977	0.0056	0.48872	2.04188	0.81379	0.3856
NONMMUT045039.2	1.54686	0.00332024	0.355745	up	3:-:121721595-121723402	MERGE.38806	3:-:121710290-121723492	3:-:121721595-121723402	NONMMUG027789.2	-	-	-	lncRNA	1.48687	0.7692	0.99571	0.40936	0.33499	0.38922
NONMMUT133055.1	-2.01710146008862	0.0474333	0.730234	down	9:+:89366922-89367850	MERGE.61081	9:+:89366020-89367850	9:+:89366922-89367850	NONMMUG083774.1	-	-	-	lncRNA	0.11191	0.21052	0.06417	0.44102	0.97791	0.28785
NONMMUT046904.2	-1.09347127640547	0.0347326	0.730234	down	4:+:42190240-42194114	MERGE.40468	4:+:42190240-42194114	4:+:42190240-42194114	NONMMUG028991.2	-	-	-	lncRNA	3.59904	1.07388	1.71679	4.28382	3.49539	5.30285
MERGE.5565.1	1.75488	0.0407064	0.730234	up	10:-:62537085-62578394	MERGE.5565	10:-:62537085-62578457	-	-	-	-	-	-	0.93973	0.50395	0.81144	0.07329	0.38168	0.43993
MERGE.38789.3	-5.72869336787345	0.0348439	0.730234	down	3:-:119717760-119783232	MERGE.38789	3:-:119712600-119784466	-	-	-	-	-	-	0.01327	0	0.78242	0.64494	0.80291	0.76995
NONMMUT009433.2	-1.07306940223185	0.0109369	0.577445	down	11:+:44725926-44727384	MERGE.8267	11:+:44725926-44727384	11:+:44725926-44727384	NONMMUG005883.2	-	-	-	lncRNA	3.87849	1.97342	2.18995	5.0909	5.46255	7.03235
MERGE.49566.2	8.49524	0.00667718	0.477584	up	6:-:91013070-91116961	MERGE.49566	6:-:91013068-91116961	-	-	-	-	-	-	2.8963	4.64769	4.07447	0	1.34317	0
MERGE.14274.1	-2.43093797783717	0.0316014	0.730234	down	13:-:10116657-10117320	MERGE.14274	13:-:10116657-10117320	-	-	-	-	-	-	0.20131	0.14727	0.03591	0.59713	0.35241	0.76307
MERGE.47774.1	-1.03935848449402	0.0173023	0.647063	down	6:-:28216369-28218588	MERGE.47774	6:-:28216369-28218588	-	-	-	-	-	-	1.44509	0.84179	0.92907	1.74433	2.43676	2.92264
NONMMUT045248.2	-1.57068372805145	0.0457963	0.730234	down	3:+:129611215-129612607	MERGE.39083	3:+:129611215-129612607	3:+:129611215-129612607	NONMMUG027914.2	-	-	-	lncRNA	0.51178	0.1092	0.29955	0.70209	0.51384	1.30337
NONMMUT094553.1	-1.95476670769203	0.00578211	0.451761	down	14:-:68446925-68447884	MERGE.19089	14:-:68446925-68447884	14:-:68446925-68447884	NONMMUG059041.1	-	-	-	lncRNA	1.46976	1.51657	0.54643	4.33663	3.72799	5.54177
MERGE.15412.1	-1.10567441763022	0.0243347	0.698557	down	13:-:53213020-53213634	MERGE.15412	13:-:53213020-53213634	-	-	-	-	-	-	1.0143	0.848	1.53146	2.49285	2.23819	2.95218
MERGE.21479.11	-5.06172666158857	0.0339884	0.730234	down	15:-:79424856-79441606	MERGE.21479	15:-:79417856-79455566	-	-	-	-	-	-	0	0	1.09555	0.7089	0.97871	0.5618
NONMMUT071851.2	-1.93202426615181	0.0285982	0.722885	down	X:-:12082546-12083111	MERGE.62468	X:-:12082546-12083111	X:-:12082546-12083111	NONMMUG044519.2	-	-	-	lncRNA	0.41985	0.07678	0.25277	0.86397	1.1187	0.52219
NONMMUT002705.2	-2.96246843907573	0.0223574	0.686839	down	1:-:134983306-134985060	MERGE.2627	1:-:134983301-135105276	1:-:134983306-134985060	NONMMUG001832.2	-	-	-	lncRNA	0.17772	0.09286	0.14945	2.06341	1.90591	0.3288
MERGE.48780.1	3.69695	0.0135523	0.61115	up	6:-:56775824-56797226	MERGE.48780	6:-:56775824-56797813	-	-	-	-	-	-	1.58825	2.99425	1.38234	0.11235	1.00159	0.02871
NONMMUT093893.1	1.50099	0.0482857	0.730234	up	14:-:16864221-16864827	MERGE.17322	14:-:16864221-16864827	14:-:16864221-16864827	NONMMUG058579.1	-	-	-	lncRNA	1.07661	0.41169	0.54995	0.15241	0.34015	0.18549
MERGE.4646.1	-1.6874695638631	0.0469	0.730234	down	10:+:18447402-18448621	MERGE.4646	10:+:18447402-18448621	-	-	-	-	-	-	1.19305	0.22264	0.33226	0.97498	1.16212	2.81487
NONMMUT149000.1	1.43705	0.0208537	0.675085	up	5:+:76157778-76158418	MERGE.45156	5:+:76157778-76158418	5:+:76157778-76158418	NONMMUG093704.1	-	-	-	lncRNA	5.00483	2.98321	3.12468	2.49483	0.75159	1.47111
NONMMUT091186.1	1.61952	0.012989	0.604811	up	13:-:38945544-38951314	MERGE.15065	13:-:38945543-38951329	13:-:38945544-38951314	NONMMUG010755.2	-	-	-	lncRNA	0.78281	1.54591	1.75268	0.51541	0.42944	0.40583
MERGE.35324.1	-1.15268430756305	0.00858106	0.530055	down	2:+:163732494-163733641	MERGE.35324	2:+:163732494-163733641	-	-	-	-	-	-	1.26788	0.87071	0.7685	2.62486	2.06233	2.1087
MERGE.51679.3	1.47223	0.0438898	0.730234	up	7:-:27158547-27174512	MERGE.51679	7:-:27157093-27181157	-	-	-	-	-	-	1.19787	1.91299	1.00884	0.37279	0.31849	1.16924
MERGE.57137.1	1.12594	0.00438644	0.403008	up	8:-:85137319-85141736	MERGE.57137	8:-:85137319-85141736	-	-	-	-	-	-	1.6439	1.56901	1.6542	0.71497	0.82564	0.86651
MERGE.16847.1	-1.64796263530106	0.0083198	0.524807	down	13:-:110258249-110260003	MERGE.16847	13:-:110258249-110260003	-	-	-	-	-	-	0.46546	0.44574	0.42797	1.09195	1.31766	2.42191
MERGE.5375.1	-1.55841798110714	0.0403198	0.730234	down	10:-:53714633-53715079	MERGE.5375	10:-:53714633-53715079	-	-	-	-	-	-	0.39872	0.70489	0.40007	1.21224	1.23176	2.5189
MERGE.1933.3	-4.80360407209729	0.0475169	0.730234	down	1:-:97706048-97741150	MERGE.1933	1:-:97706048-97770411	-	-	-	-	-	-	0.91517	0	0.66989	2.82696	2.4025	2.05155
NONMMUT016062.2	-1.30241425378534	0.0322218	0.730234	down	12:-:113418621-113419101	MERGE.14069	12:-:113406604-113430444	12:-:113418621-113419101	NONMMUG010098.2	-	-	-	lncRNA	0.90014	0.50883	0.95246	2.76707	1.93391	1.35703
NONMMUT152437.1	-1.40701019926375	0.0399493	0.730234	down	8:+:120307380-120308145	MERGE.58898	8:+:120307380-120308145	8:+:120307380-120308145	NONMMUG095670.1	-	-	-	lncRNA	0.31023	0.09929	0.28015	0.60388	0.57503	0.49609
NONMMUT098197.1	2.10771	0.00936231	0.546342	up	16:+:25015331-25017605	MERGE.23117	16:+:25015331-25017605	16:+:25015331-25017605	NONMMUG061381.1	-	-	-	lncRNA	2.16745	0.51101	1.35729	0.23238	0.32673	0.28458
MERGE.15087.1	-1.06893996101137	0.0281852	0.719555	down	13:-:41367683-41368361	MERGE.15087	13:-:41367683-41368361	-	-	-	-	-	-	2.05613	0.86408	1.17641	2.21895	3.20302	3.19212
MERGE.33259.31	-4.86658234132788	0.0428507	0.730234	down	2:-:91163148-91183026	MERGE.33259	2:-:91137360-91202834	-	-	-	-	-	-	0	1.85045	0.04968	2.41956	3.30859	1.42576
MERGE.20535.1	1.00034	0.0363978	0.730234	up	15:-:36060788-36061516	MERGE.20535	15:-:36060788-36061516	-	-	-	-	-	-	2.95416	1.62453	1.48822	1.03338	0.8308	1.2163
MERGE.9197.1	-1.25552097116231	0.0482603	0.730234	down	11:+:70027269-70028028	MERGE.9197	11:+:70027269-70028028	-	-	-	-	-	-	0.60582	0.54325	0.43924	2.34765	1.15915	0.83335
NONMMUT105849.1	-1.07143944436864	0.0290736	0.724944	down	19:-:8503362-8504055	MERGE.29426	19:-:8503362-8504055	19:-:8503362-8504055	NONMMUG066158.1	-	-	-	lncRNA	2.67512	0.97065	1.58046	3.42788	2.99495	4.38049
MERGE.41694.1	-1.08656985269493	0.00904856	0.541717	down	4:+:106949395-106955008	MERGE.41694	4:+:106949395-106955008	-	-	-	-	-	-	2.15026	1.66489	1.18035	3.97149	3.47204	3.64813
MERGE.10532.18	-5.79437086877902	0.0399753	0.730234	down	11:-:102199390-102230136	MERGE.10532	11:-:102194432-102230166	-	-	-	-	-	-	0.00515	4.15072	0	5.07653	2.30688	2.22201
NONMMUT106478.1	5.03968	0.0269571	0.713057	up	19:-:59860844-59862026	MERGE.30883	19:-:59860844-59862026	19:-:59860844-59862026	NONMMUG066537.1	-	-	-	lncRNA	2.03387	0.76229	0.81631	1.25126	0	0
MERGE.21303.5	1.11843	0.013501	0.609722	up	15:-:76347041-76351110	MERGE.21303	15:-:76347040-76351111	-	-	-	-	-	-	4.14749	1.84658	2.80116	1.15811	1.50439	1.51111
NONMMUT019429.2	-1.33076242273604	0.00474142	0.414659	down	13:-:115095907-115098192	MERGE.17029	13:-:115095907-115098192	13:-:115095907-115098192	NONMMUG012051.2	-	-	-	lncRNA	11.1814	5.16634	7.94288	17.6912	18.1304	26.1354
NONMMUT054050.2	-1.36278892824177	0.00655791	0.475053	down	5:+:115303893-115311434	MERGE.46126	5:+:115301120-115320082	5:+:115303893-115311434	NONMMUG033506.2	-	-	-	lncRNA	0.45593	0.25773	0.27171	0.99584	0.70425	0.90992
NONMMUT059852.2	1.06184	0.0043921	0.403329	up	7:-:6703905-6705835	MERGE.51210	7:-:6703892-6730431	7:-:6703905-6705835	NONMMUG037169.2	-	-	-	lncRNA	31.6582	19.62	25.2705	11.6354	12.0968	13.8703
NONMMUT106484.1	1.05027	0.0416211	0.730234	up	19:-:59870384-59871576	MERGE.30887	19:-:59870384-59872101	19:-:59870384-59871576	NONMMUG066541.1	-	-	-	lncRNA	3.27423	1.32056	1.63892	1.19646	0.68074	1.17974
NONMMUT098084.1	-1.23476900234054	0.021234	0.676911	down	16:+:19243525-19244834	MERGE.22923	16:+:19243523-19244834	16:+:19243525-19244834	NONMMUG015975.2	-	-	-	lncRNA	0.48752	0.32346	0.60976	1.04924	0.94568	1.5471
MERGE.11732.1	-5.98159733311883	5.75668e-05	0.0377652	down	12:+:18917988-18918270	MERGE.11732	12:+:18917988-18918270	-	-	-	-	-	-	0	0	0	2.33505	0.8755	1.49198
MERGE.20169.1	-1.14627171111527	0.0147543	0.625329	down	15:-:26830012-26833046	MERGE.20169	15:-:26830012-26833046	-	-	-	-	-	-	1.84491	0.94509	0.80136	2.26442	2.54888	3.29715
NONMMUT082230.1	1.89819	0.0301762	0.730234	up	10:-:78254735-78255440	MERGE.5936	10:-:78254735-78255440	10:-:78254735-78255440	NONMMUG051186.1	-	-	-	lncRNA	1.38846	0.64636	0.59104	0.14976	0.50692	0.11961
MERGE.5871.5	6.22439	0.0498254	0.730234	up	10:-:76207326-76237836	MERGE.5871	10:-:76207222-76237865	-	-	-	-	-	-	0.73295	3.55882	4.1443	0	2.52306	0
NONMMUT004510.2	1.09625	0.0305723	0.730234	up	1:+:195042383-195044679	MERGE.4121	1:+:195042383-195044679	1:+:195042383-195044679	NONMMUG002902.2	-	-	-	lncRNA	0.92463	0.60072	0.42042	0.2992	0.28165	0.33087
MERGE.7821.3	6.58647	0.0443286	0.730234	up	11:-:21558490-21571914	MERGE.7821	11:-:21556787-21572367	-	-	-	-	-	-	5.55334	11.8277	14.4644	0	0	35.5079
MERGE.14630.1	-1.50236740328897	0.00900366	0.540788	down	13:-:21385142-21531073	MERGE.14630	13:-:21385142-21531120	-	-	-	-	-	-	1.52938	1.46953	1.11561	5.32355	5.17326	2.36082
MERGE.39775.1	-1.40896148492756	0.0172235	0.64664	down	4:+:3249471-3249782	MERGE.39775	4:+:3249471-3249782	-	-	-	-	-	-	1.52331	0.76612	0.99351	2.32981	2.73533	3.87947
MERGE.32458.1	-1.73631116041849	0.00224076	0.300023	down	2:+:58597100-58598123	MERGE.32458	2:+:58597100-58598123	-	-	-	-	-	-	0.78323	0.51991	0.57049	1.70368	2.44649	2.50149
MERGE.6357.3	-2.43239803759252	0.0413558	0.730234	down	10:-:86690840-86705448	MERGE.6357	10:-:86690209-86705509	-	-	-	-	-	-	51.0411	5.07467	5.80531	28.7351	79.3747	112.79
MERGE.43214.3	-1.44679772990253	0.026681	0.711563	down	4:-:149328416-149426631	MERGE.43214	4:-:149328416-149426749	-	-	-	-	-	-	0.46842	0.97331	0.47401	1.12188	2.51005	1.9833
NONMMUT019731.2	-4.19108711902165	0.0147893	0.625409	down	14:+:16432960-16435261	MERGE.17309	14:+:16365161-16435462	14:+:16432960-16435261	NONMMUG012261.2	-	-	-	lncRNA	0.03871	0.21239	0.00518	0.77507	0.52022	0.58694
MERGE.33442.1	6.73676	0.0141293	0.617564	up	2:-:98666100-98667333	MERGE.33442	2:-:98666100-98667333	-	-	-	-	-	-	314.807	171.683	283.839	150.427	0.22261	0.35407
MERGE.4643.1	-2.15170581836723	0.00187149	0.279006	down	10:+:18388092-18389838	MERGE.4643	10:+:18388092-18389838	-	-	-	-	-	-	0.81615	0.3234	0.28662	1.59626	2.37163	2.03824
MERGE.36868.1	-4.21657651767481	0.00801811	0.517295	down	3:-:49464089-49464336	MERGE.36868	3:-:49464089-49464336	-	-	-	-	-	-	0	0	0	2.45143	0.11101	0.28376
NONMMUT073282.2	-2.26032238606905	0.0156487	0.632248	down	X:+:98939906-98942029	MERGE.63352	X:+:98936241-98949017	X:+:98939906-98942029	NONMMUG045441.2	-	-	-	lncRNA	0.14684	0.09208	0.68479	1.06403	1.02394	1.20599
NONMMUT113681.1	-1.00313473771236	0.0288886	0.724224	down	3:-:97267965-97269652	MERGE.38233	3:-:97267965-97269652	3:-:97267965-97269652	NONMMUG071260.1	-	-	-	lncRNA	1.11744	0.50849	0.71335	1.59724	2.02233	1.20065
MERGE.35475.1	2.01617	0.034041	0.730234	up	2:-:166815800-166816698	MERGE.35475	2:-:166815800-166816698	-	-	-	-	-	-	0.59475	0.48343	0.63655	0.47044	0.09187	0.06262
MERGE.16417.1	-1.00562777448624	0.0168031	0.643464	down	13:-:92101589-92111522	MERGE.16417	13:-:92101589-92111522	-	-	-	-	-	-	1.75225	0.80607	0.80889	2.22712	2.17544	2.31361
NONMMUT149166.1	2.33733	0.00399586	0.386894	up	5:+:122502381-122503802	MERGE.46353	5:+:122502381-122503802	5:+:122502381-122503802	NONMMUG093810.1	-	-	-	lncRNA	0.73113	0.57305	0.57012	0.24165	0.07744	0.09898
MERGE.51304.13	-7.14851752291152	0.00828051	0.524359	down	7:-:14563299-14622408	MERGE.51304	7:-:14530652-14622685	-	-	-	-	-	-	0	0	1.06772	4.06261	2.86925	2.21821
NONMMUT100387.1	-5.68420905758944	0.000428432	0.128243	down	16:-:90647504-90655954	NONMMUG062794.1	16:-:90647504-90655954	16:-:90647504-90655954	NONMMUG062794.1	-	-	-	lncRNA	0	0	0.06083	1.02832	0.87786	0.66422
MERGE.27829.1	-3.02007223896383	0.0037417	0.374104	down	18:-:36155000-36156230	MERGE.27829	18:-:36155000-36156230	-	-	-	-	-	-	0.62739	0.07061	0.1937	1.29909	1.58783	2.29809
NONMMUT146208.1	-7.89854099398716	3.56563e-06	0.00757563	down	2:+:24183211-24183672	MERGE.31509	2:+:24183211-24183672	2:+:24183211-24183672	NONMMUG092042.1	-	-	-	lncRNA	0	0	0	2.8893	3.24756	4.50866
MERGE.33370.8	4.91277	0.032709	0.730234	up	2:-:93419176-93462443	MERGE.33370	2:-:93419111-93463140	-	-	-	-	-	-	10.2186	15.2806	14.878	1.33551	5.92855	0.00777
NONMMUT052701.2	-1.04597114049026	0.026417	0.709465	down	5:-:73187954-73190417	MERGE.45076	5:-:73187954-73190417	5:-:73187954-73190417	NONMMUG032727.2	-	-	-	lncRNA	1.2176	0.45418	0.5274	1.65741	1.32398	1.41086
NONMMUT037608.2	-1.30972863217149	0.0155853	0.632225	down	2:-:65017241-65018512	MERGE.32610	2:-:65017241-65018512	2:-:65017241-65018512	NONMMUG023205.2	-	-	-	lncRNA	4.28521	1.72542	1.49027	6.43157	4.71815	6.84907
NONMMUT142001.1	1.43835	0.0235063	0.693117	up	12:-:87161378-87164700	MERGE.13318	12:-:87161378-87164700	12:-:87161378-87164700	NONMMUG089484.1	-	-	-	lncRNA	1.12905	0.60456	0.51389	0.39359	0.18339	0.25369
MERGE.4632.1	-1.29631280151972	0.00644188	0.471951	down	10:+:18343337-18349162	MERGE.4632	10:+:18343337-18349162	-	-	-	-	-	-	1.16249	0.64526	0.57298	2.1188	1.56408	2.3578
MERGE.30515.3	-4.75241778007971	0.0190001	0.658461	down	19:-:46032578-46039481	MERGE.30515	19:-:46031619-46045214	-	-	-	-	-	-	6.1307	0.15071	0.03007	9.25537	10.0561	4.95767
MERGE.64391.12	5.84615	0.0237894	0.694213	up	Y:-:1157961-1245702	MERGE.64391	Y:-:1096861-1245759	-	-	-	-	-	-	2.12984	0.96796	1.77213	2.07785	0	0
NONMMUT052907.2	-1.02805580901118	0.0470641	0.730234	down	5:+:81102945-81104342	MERGE.45260	5:+:81102945-81104342	5:+:81102945-81104342	NONMMUG032853.2	-	-	-	lncRNA	16.3503	5.16049	10.8647	15.9107	20.8442	27.7359
MERGE.52712.1	-1.2863160196671	0.0289538	0.724224	down	7:-:61852976-61853623	MERGE.52712	7:-:61852976-61853623	-	-	-	-	-	-	2.31494	0.87188	0.88312	2.48827	2.71899	4.47425
MERGE.63918.3	-6.31475950694914	0.0310748	0.730234	down	X:-:140539537-140599031	MERGE.63918	X:-:140539528-140600659	-	-	-	-	-	-	0	1.75323	0	3.0101	5.05157	1.11608
NONMMUT056727.2	-1.33606998004256	0.040387	0.730234	down	6:-:47546666-47551704	MERGE.48441	6:-:47530139-47595341	6:-:47546666-47551704	NONMMUG035229.2	-	-	-	lncRNA	0.66712	0.86047	0.42747	2.09858	0.94912	2.53981
ENSMUST00000098305	-3.5668445622883	0.0193133	0.660276	down	7:-:92737658-92741468	MERGE.53371	7:-:92728517-92741468	7:-:92737658-92741468	ENSMUSG00000074024	666737	Q3UL04	4632427E13Rik	RIKEN cDNA 4632427E13 gene	0.26891	4.19376	0.13765	5.5314	7.9353	7.12396
NONMMUT078438.1	1.61509	0.0278933	0.718037	up	1:-:111848218-111850080	NONMMUG048718.1	1:-:111848218-111850080	1:-:111848218-111850080	NONMMUG048718.1	-	-	-	lncRNA	1.85753	1.07309	0.84472	0.62429	0.17733	0.61948
MERGE.11347.4	1.08791	0.0424808	0.730234	up	11:-:120878700-120885433	MERGE.11347	11:-:120826529-120932872	-	-	-	-	-	-	2.89048	1.6439	1.92596	1.00951	1.8611	0.63019
MERGE.24181.1	-1.95930867046295	0.00040741	0.125919	down	16:-:90694180-90697364	MERGE.24181	16:-:90694180-90697364	-	-	-	-	-	-	0.73679	0.36842	0.42298	2.04159	2.13928	1.89573
MERGE.10985.1	-1.71337618499845	0.00409474	0.390602	down	11:+:113703497-113705187	MERGE.10985	11:+:113703497-113705187	-	-	-	-	-	-	1.01884	0.37266	0.44417	2.43069	1.63616	1.73953
NONMMUT039590.2	-1.7286494915608	0.00974076	0.556654	down	2:+:124334132-124335405	MERGE.34092	2:+:124334132-124335405	2:+:124334132-124335405	NONMMUG024486.2	-	-	-	lncRNA	0.265	0.25554	0.18372	0.60026	0.87077	1.07298
NONMMUT007446.2	-2.24168101723321	0.00977853	0.556888	down	10:-:115369077-115371789	MERGE.6875	10:-:115368404-115384443	10:-:115369077-115371789	NONMMUG004730.2	-	-	-	lncRNA	3.06024	3.62434	0.69872	8.60308	8.89415	12.5855
NONMMUT114380.1	-1.83109642862728	0.0153447	0.630365	down	3:-:149228480-149229182	MERGE.39547	3:-:149228480-149229182	3:-:149228480-149229182	NONMMUG071735.1	-	-	-	lncRNA	1.26762	0.27819	0.42397	1.3536	2.38878	2.22226
MERGE.55369.1	1.14233	0.0436245	0.730234	up	8:+:22426813-22427374	MERGE.55369	8:+:22426813-22427374	-	-	-	-	-	-	1.63851	1.46929	1.18797	0.61143	1.07768	0.45078
MERGE.55342.1	-7.66007580489311	1.71065e-05	0.0184876	down	8:+:21017364-21017822	MERGE.55342	8:+:21017364-21017822	-	-	-	-	-	-	0	0	0	1.9004	3.05886	4.53813
NONMMUT004848.2	4.71315	0.0222543	0.685406	up	10:-:18581846-18585107	MERGE.4653	10:-:18581839-18743949	10:-:18581846-18585107	NONMMUG003121.2	-	-	-	lncRNA	6.88432	5.93545	6.06706	0.04457	0.05486	6.59276
MERGE.33143.5	7.38074	0.0016058	0.252508	up	2:-:84330626-84425973	MERGE.33143	2:-:84330626-84425973	-	-	-	-	-	-	1.08521	0.29343	0.69469	0.03912	0	0
MERGE.25684.6	-4.37455964330713	0.0499369	0.730234	down	17:-:34728381-34810204	MERGE.25684	17:-:34728380-34823464	-	-	-	-	-	-	0	0	0	1.16058	0	1.03414
MERGE.61801.4	5.64872	0.0221156	0.685038	up	9:-:114586133-114640184	MERGE.61801	9:-:114585878-114640184	-	-	-	-	-	-	0.60032	0.95963	0.94146	0	0.87576	0
MERGE.61801.6	1.28381	0.0190348	0.658461	up	9:-:114591516-114640074	MERGE.61801	9:-:114585878-114640184	-	-	-	-	-	-	3.20307	6.45166	5.44684	1.75444	2.49013	2.16891
MERGE.31669.9	2.07953	0.0177918	0.650528	up	2:+:26583880-26592676	MERGE.31669	2:+:26580014-26636497	-	-	-	-	-	-	1.87616	6.12735	5.31203	1.2434	1.28045	0.60999
NONMMUT086394.1	2.82895	0.0135982	0.612038	up	12:+:17827701-17828570	MERGE.11676	12:+:17827701-17828570	12:+:17827701-17828570	NONMMUG053785.1	-	-	-	lncRNA	5.80434	0.99908	1.69925	0.39497	0.17404	0.40444
MERGE.15585.23	6.2743	0.0251613	0.702508	up	13:-:59772277-59809478	MERGE.15585	13:-:59755409-59823147	-	-	-	-	-	-	1.05105	1.28333	1.85306	1.95219	0	0
MERGE.50487.5	1.04763	0.0101306	0.564445	up	6:-:125318256-125322047	MERGE.50487	6:-:125306571-125323047	-	-	-	-	-	-	4.80379	3.51415	2.93086	2.02376	1.5844	2.18446
MERGE.16433.1	-5.70552337276827	0.0092693	0.543998	down	13:+:93200606-93201557	MERGE.16433	13:+:93200606-93201557	-	-	-	-	-	-	0	0.02283	0	0.24989	0.30364	2.94201
NONMMUT027363.2	-3.15886336831148	0.0345073	0.730234	down	16:+:77329328-77691399	MERGE.23994	16:+:77236317-77691403	16:+:77329328-77691399	NONMMUG016963.2	-	-	-	lncRNA	0.20567	0.12896	0	0.64056	0.51737	0.36195
MERGE.62798.1	-1.24262988272239	0.0437513	0.730234	down	X:-:49218322-49219521	MERGE.62798	X:-:49218322-49219521	-	-	-	-	-	-	1.34908	0.36217	0.55637	1.18948	1.52561	2.25189
NONMMUT038424.2	-1.11651568179864	0.0479605	0.730234	down	2:+:90972631-90974263	MERGE.33249	2:+:90972631-90974263	2:+:90972631-90974263	NONMMUG023746.2	-	-	-	lncRNA	0.50023	0.44578	0.19712	0.91455	0.83449	0.68088
NONMMUT144629.1	-5.2441392277099	0.0231599	0.692607	down	16:-:42884278-42912070	MERGE.23560	16:-:42884278-42912253	16:-:42884278-42912070	NONMMUG016529.3	-	-	-	lncRNA	0	0.49743	0	0.49893	0.70206	0.95525
MERGE.42005.1	-1.34661533563225	0.010782	0.574266	down	4:-:118006869-118007518	MERGE.42005	4:-:118006869-118007518	-	-	-	-	-	-	1.34813	0.6519	0.7887	2.07396	2.13885	2.98809
MERGE.9247.3	5.33363	0.0115324	0.58342	up	11:-:70644695-70647479	MERGE.9247	11:-:70644196-70647479	-	-	-	-	-	-	0.99257	0.5313	1.35059	0	0.4263	0
NONMMUT108149.1	1.18405	0.0264523	0.709465	up	2:+:152645879-152648131	MERGE.34919	2:+:152645879-152648131	2:+:152645879-152648131	NONMMUG067629.1	-	-	-	lncRNA	2.4589	0.91144	1.44992	0.99138	0.65983	0.506
MERGE.39845.2	1.03067	0.0340168	0.730234	up	4:-:6393216-6454133	MERGE.39845	4:-:6393216-6454271	-	-	-	-	-	-	5.94136	4.97167	2.9747	1.52933	2.9554	2.6677
MERGE.51571.1	1.35573	0.0194499	0.661518	up	7:-:24396716-24397874	MERGE.51571	7:-:24396716-24397874	-	-	-	-	-	-	2.40917	0.90932	0.98751	0.59297	0.47506	0.51003
NONMMUT035172.2	1.59079	0.0187633	0.657955	up	19:-:56656279-56664611	NONMMUG021678.2	19:-:56656279-56664625	19:-:56656279-56664611	NONMMUG021678.2	-	-	-	lncRNA	0.75096	0.6226	0.56262	0.25245	0.30932	0.12651
MERGE.48263.1	-1.70996936036473	0.0384046	0.730234	down	6:+:40343919-40344280	MERGE.48263	6:+:40343919-40344280	-	-	-	-	-	-	2.13348	0.48022	0.55988	2.19056	2.0153	4.78217
NONMMUT014079.2	-1.44450685353304	0.0311942	0.730234	down	12:+:44373197-44374262	MERGE.12295	12:+:44373197-44374262	12:+:44373197-44374262	NONMMUG008909.2	-	-	-	lncRNA	0.45978	0.20385	0.14539	0.6571	0.52942	0.85819
MERGE.50519.1	1.97408	0.00288565	0.338683	up	6:+:127831034-127833939	MERGE.50519	6:+:127831034-127833939	-	-	-	-	-	-	2.627	0.85619	1.39078	0.45025	0.37894	0.36324
MERGE.3198.8	-6.94266418502852	0.027631	0.715622	down	1:-:162830050-162861446	MERGE.3198	1:-:162826371-162898726	-	-	-	-	-	-	0	5.82509	0	3.88166	4.05026	5.57293
MERGE.3198.2	-3.56529535240858	0.0289643	0.724367	down	1:-:162829561-162866610	MERGE.3198	1:-:162826371-162898726	-	-	-	-	-	-	0.53582	0.07204	0.29759	8.33757	0.54759	4.48743
MERGE.3198.1	1.68654	0.0254123	0.703709	up	1:-:162826371-162866610	MERGE.3198	1:-:162826371-162898726	-	-	-	-	-	-	3.90015	2.14867	2.34066	2.199	0.57525	0.52955
NONMMUT063286.2	1.33388	0.00734372	0.497837	up	7:+:113240250-113243216	MERGE.53948	7:+:113207465-113314126	7:+:113240250-113243216	NONMMUG039083.2	-	-	-	lncRNA	2.2376	1.05464	1.19744	0.65035	0.48713	0.68783
MERGE.61054.1	-2.53805573532139	0.0060922	0.459709	down	9:-:89102439-89102737	MERGE.61054	9:-:89102439-89102737	-	-	-	-	-	-	0.29804	0.14535	0.55823	2.2101	2.0256	1.41214
MERGE.7160.8	-10.0536767986252	2.55552e-06	0.00666737	down	10:-:123112060-123183311	MERGE.7160	10:-:123105006-123202376	-	-	-	-	-	-	0	0	0	1.87679	0.93747	1.11666
NONMMUT011777.2	2.17539	0.0173812	0.647989	up	11:+:97024178-97024736	MERGE.10269	11:+:97013394-97024736	11:+:97024178-97024736	NONMMUG007454.2	-	-	-	lncRNA	0.92993	0.93295	0.72514	0.11821	0.12312	0.42802
NONMMUT002689.2	1.09136	0.0292589	0.726531	up	1:+:134631310-134632878	MERGE.2623	1:+:134560171-134635285	1:+:134631310-134632878	NONMMUG001820.2	-	-	-	lncRNA	1.35365	0.91407	0.93462	0.83392	0.37724	0.43954
NONMMUT029744.2	1.67227	0.00688714	0.483178	up	17:+:44105928-44107326	MERGE.25893	17:+:44105898-44125370	17:+:44105928-44107326	NONMMUG018374.3	-	-	-	lncRNA	1.94279	1.3591	1.48281	0.31175	0.58051	0.80482
MERGE.25711.6	2.14913	0.0428507	0.730234	up	17:-:35149177-35164863	MERGE.25711	17:-:35149076-35164897	-	-	-	-	-	-	3.38626	0.66291	2.87656	0.84495	0.70723	0.14586
MERGE.41038.15	-1.47723194280473	0.00123532	0.222724	down	4:-:72137667-72199492	MERGE.41038	4:-:72109949-72200919	-	-	-	-	-	-	1.04664	0.92972	0.76514	2.47807	2.48565	3.22045
MERGE.41038.14	-1.08771761590243	0.00781936	0.510526	down	4:-:72127893-72199492	MERGE.41038	4:-:72109949-72200919	-	-	-	-	-	-	1.90675	0.96452	1.35143	2.47122	3.24391	3.37943
NONMMUT035978.2	-1.05494217163025	0.0234498	0.693117	down	2:-:18982419-18985759	MERGE.31381	2:-:18982419-18985759	2:-:18982419-18985759	NONMMUG022137.2	-	-	-	lncRNA	2.63616	0.8813	1.28464	3.17652	3.25479	3.19737
MERGE.63874.1	1.209	0.0290998	0.724944	up	X:-:136997834-136999016	MERGE.63874	X:-:136997834-136999016	-	-	-	-	-	-	2.52351	1.52459	1.93495	0.81555	0.58178	1.57043
NONMMUT018803.2	1.0399	0.0199184	0.665464	up	13:-:97938866-97942396	MERGE.16546	13:-:97880269-98206462	13:-:97938866-97942396	NONMMUG011701.2	-	-	-	lncRNA	5.04751	2.48316	3.4507	1.45227	1.75423	2.47527
MERGE.2589.8	10.3888	4.33215e-07	0.0035216	up	1:-:133619940-133661281	MERGE.2589	1:-:133619862-133661380	-	-	-	-	-	-	1.95147	2.21724	1.84308	0	0	0
NONMMUT126241.1	-4.7042072207318	0.0111428	0.579591	down	7:+:129658952-129662721	MERGE.54394	7:+:129656262-129731647	7:+:129658952-129662721	NONMMUG039424.3	-	-	-	lncRNA	0	0.09024	0.0198	0.19759	0.98321	1.2391
NONMMUT119692.1	1.7243	0.0495437	0.730234	up	5:+:143329308-143330950	MERGE.47137	5:+:143329247-143333350	5:+:143329308-143330950	NONMMUG034240.2	-	-	-	lncRNA	1.03053	0.72081	1.17552	0.81245	0.36863	0.08566
MERGE.2921.1	-1.19124334892268	0.016171	0.637725	down	1:-:152019474-152021223	MERGE.2921	1:-:152019474-152021223	-	-	-	-	-	-	1.08634	0.53394	0.85839	1.66149	1.61246	2.73444
MERGE.62973.1	1.15955	0.00595636	0.458101	up	X:-:72909649-72911224	MERGE.62973	X:-:72909649-72911224	-	-	-	-	-	-	2.39371	1.72351	2.08789	1.18243	0.82974	0.96449
NONMMUT060535.2	-1.12081803785072	0.0428465	0.730234	down	7:-:29953292-29954065	MERGE.51902	7:-:29930815-29954089	7:-:29953292-29954065	NONMMUG037631.2	-	-	-	lncRNA	0.46054	0.21056	0.27726	0.70009	0.62244	0.69099
NONMMUT141786.1	1.83175	0.00227234	0.301528	up	12:-:24648006-24649191	MERGE.11881	12:-:24648006-24649191	12:-:24648006-24649191	NONMMUG089377.1	-	-	-	lncRNA	3.40626	1.46577	1.98032	0.75777	0.55709	0.60522
NONMMUT029858.2	-1.70612962171426	0.029922	0.730201	down	17:-:46858657-46865509	MERGE.26026	17:-:46798116-47010556	17:-:46858657-46865509	NONMMUG018450.2	-	-	-	lncRNA	2.22891	0.78391	0.4645	4.17661	1.8671	4.00093
MERGE.39031.1	-1.03418397475648	0.0224202	0.687601	down	3:-:127669091-127669673	MERGE.39031	3:-:127669091-127669673	-	-	-	-	-	-	1.06998	0.87591	0.98158	2.13095	1.818	2.51069
MERGE.43862.1	-1.01198173743846	0.0329454	0.730234	down	5:-:20848375-20849456	MERGE.43862	5:-:20848375-20849456	-	-	-	-	-	-	0.8236	0.6025	0.59501	1.27034	1.1704	1.97717
MERGE.20920.1	1.29238	0.0362625	0.730234	up	15:-:58192639-58194294	MERGE.20920	15:-:58192639-58194294	-	-	-	-	-	-	3.74895	0.99727	1.61266	1.06944	0.74809	0.61193
NONMMUT117920.1	-1.31527859165954	0.0120527	0.590896	down	5:+:9174267-9175347	MERGE.43711	5:+:9173250-9175347	5:+:9174267-9175347	NONMMUG073987.1	-	-	-	lncRNA	3.54476	1.13575	1.47786	4.69482	5.00425	4.79127
NONMMUT065384.2	1.61325	0.0068548	0.481736	up	8:+:41017738-41020542	MERGE.55745	8:+:41017468-41042054	8:+:41017738-41020542	NONMMUG040430.2	-	-	-	lncRNA	2.35246	3.12555	2.49058	0.63366	1.13136	1.1086
MERGE.17025.10	-1.28223849001023	0.00378516	0.375506	down	13:-:115015389-115101624	MERGE.17025	13:-:114953096-115102343	-	-	-	-	-	-	6.41835	3.47464	4.42314	9.28323	11.411	14.718
MERGE.17897.4	5.80837	0.0163655	0.638915	up	14:-:31012434-31019014	MERGE.17897	14:-:31012433-31019152	-	-	-	-	-	-	2.30603	3.62167	0.65366	0.16032	0	0.06146
NONMMUT010368.2	1.133	0.0345012	0.730234	up	11:-:69010475-69012482	MERGE.9089	11:-:69010475-69012482	11:-:69010475-69012482	NONMMUG006517.2	-	-	-	lncRNA	2.64057	0.90361	1.15184	0.85564	0.69236	0.52569
NONMMUT111884.1	-1.14821622132889	0.0428383	0.730234	down	3:+:106063893-106064947	NONMMUG070042.1	3:+:106063893-106064947	3:+:106063893-106064947	NONMMUG070042.1	-	-	-	lncRNA	0.26748	0.27806	0.38422	0.70153	0.57408	0.96052
NONMMUT129203.1	1.57955	0.0226596	0.688654	up	8:+:92402123-92402726	NONMMUG081122.1	8:+:92402123-92402726	8:+:92402123-92402726	NONMMUG081122.1	-	-	-	lncRNA	1.59834	0.95339	0.71059	0.3501	0.45579	0.25632
NONMMUT011481.2	1.09194	0.0365158	0.730234	up	11:+:90054215-90057720	MERGE.10070	11:+:90054215-90072521	11:+:90054215-90057720	NONMMUG007257.2	-	-	-	lncRNA	1.87033	2.32904	1.93993	1.76717	0.82287	0.73682
NONMMUT145388.1	1.85512	0.0202296	0.668433	up	18:+:35625490-35629234	MERGE.27808	18:+:35625490-35632076	18:+:35625490-35629234	NONMMUG064595.2	-	-	-	lncRNA	0.93616	0.91952	0.75147	0.4212	0.09261	0.41366
NONMMUT086510.1	-2.1570702720836	0.00018296	0.0774359	down	12:+:21558383-21564177	MERGE.11823	12:+:21543293-21564177	12:+:21558383-21564177	NONMMUG008625.2	-	-	-	lncRNA	0.37675	0.19874	0.23042	1.22015	1.21378	1.27507
NONMMUT154199.1	-2.19368716124243	0.0214555	0.679104	down	X:+:74261227-74261549	MERGE.63027	X:+:74254687-74261549	X:+:74261227-74261549	NONMMUG096474.1	-	-	-	lncRNA	1.2875	4.50746	0.66439	8.67454	6.64805	8.88906
NONMMUT045231.2	-1.15952662996841	0.00569421	0.448252	down	3:-:129301889-129303110	MERGE.39078	3:-:129301889-129303110	3:-:129301889-129303110	NONMMUG027905.2	-	-	-	lncRNA	2.46728	1.37813	1.59027	3.76375	4.20156	4.77975
NONMMUT085832.1	1.44081	0.00615632	0.459709	up	11:-:103666949-103670137	MERGE.10625	11:-:103666949-103670137	11:-:103666949-103670137	NONMMUG053432.1	-	-	-	lncRNA	0.9175	0.58601	0.74023	0.24866	0.23308	0.41927
MERGE.33710.1	-2.31403175220057	0.00832261	0.524807	down	2:+:112595822-112596484	MERGE.33710	2:+:112595822-112596484	-	-	-	-	-	-	1.3441	0.18026	0.43157	2.31237	1.97234	2.88704
MERGE.41773.5	-6.20043899810922	0.0240267	0.696681	down	4:-:108639165-108780616	MERGE.41773	4:-:108637466-108780798	-	-	-	-	-	-	0.8488	0	0	0.34092	1.14784	1.03281
MERGE.56249.1	-1.49554396854857	0.00266964	0.324101	down	8:-:53586867-53638966	MERGE.56249	8:-:53586867-53639065	-	-	-	-	-	-	0.34981	0.25753	0.25576	0.67212	0.87347	1.10847
MERGE.63743.1	-1.29714660122701	0.015613	0.632225	down	X:+:125104993-125106573	MERGE.63743	X:+:125104993-125106573	-	-	-	-	-	-	0.41335	0.42608	0.54294	0.88611	1.54975	1.31752
NONMMUT055257.2	-1.12938385289471	0.0335189	0.730234	down	5:+:146242999-146243866	MERGE.47260	5:+:146242999-146243866	5:+:146242999-146243866	NONMMUG034315.2	-	-	-	lncRNA	0.59888	0.51321	1.07134	1.88806	1.76026	1.28096
MERGE.38384.1	-6.24555538675934	0.000294764	0.103787	down	3:+:102818495-102818942	MERGE.38384	3:+:102818495-102818942	-	-	-	-	-	-	0.13261	0	0	2.71408	2.21221	2.82743
NONMMUT009097.2	5.08829	0.0194458	0.661518	up	11:+:30267464-30280491	MERGE.8043	11:+:30267464-30286844	11:+:30267464-30280491	NONMMUG005644.2	-	-	-	lncRNA	1.24842	0.54361	0.71581	0	0	0.71358
MERGE.57151.4	9.63251	0.000541029	0.149394	up	8:-:85260395-85299538	MERGE.57151	8:-:85260392-85299802	-	-	-	-	-	-	0.61905	1.35133	5.39458	0	0	0
MERGE.2385.1	-1.35718171998981	0.00351353	0.365687	down	1:-:127659949-127663524	MERGE.2385	1:-:127659949-127663524	-	-	-	-	-	-	1.75686	1.02695	1.25689	4.72331	3.07939	3.20372
NONMMUT137233.1	1.60085	0.0326264	0.730234	up	X:-:103944910-103946548	NONMMUG086729.1	X:-:103944910-103946548	X:-:103944910-103946548	NONMMUG086729.1	-	-	-	lncRNA	2.69135	0.60987	1.25841	0.29029	0.5207	0.56675
NONMMUT145128.1	9.18025	9.31109e-07	0.00470411	up	17:-:37712134-37713598	MERGE.25844	17:-:37712134-37713924	17:-:37712134-37713598	NONMMUG091403.1	-	-	-	lncRNA	2.3419	2.35099	2.76691	0	0	0
MERGE.14046.8	-1.05713797782535	0.03594	0.730234	down	12:+:113031641-113041031	MERGE.14046	12:+:113014508-113074401	-	-	-	-	-	-	1.13753	0.43271	0.41394	1.58583	1.06127	1.32946
MERGE.9134.3	1.97743	0.0115916	0.584019	up	11:+:69452355-69454227	MERGE.9134	11:+:69448548-69454227	-	-	-	-	-	-	0.62139	0.9315	0.85041	0.37165	0.2077	0.11584
NONMMUT135169.1	3.72696	0.0203677	0.669963	up	9:-:95447983-95449034	MERGE.61201	9:-:95447656-95449034	9:-:95447983-95449034	NONMMUG085235.1	-	-	-	lncRNA	2.21655	0.46476	0.35132	0.03769	0.05234	0.05351
NONMMUT041240.2	2.48151	0.0455968	0.730234	up	2:+:166823756-166825957	MERGE.35474	2:+:166805577-166898052	2:+:166823756-166825957	NONMMUG025539.2	-	-	-	lncRNA	2.07069	0.81907	1.03412	0.07803	1.46275	0.09587
NONMMUT029765.2	-1.09741596819884	0.0496976	0.730234	down	17:+:44819505-44821173	MERGE.25918	17:+:44819505-44821173	17:+:44819505-44821173	NONMMUG018387.2	-	-	-	lncRNA	0.66742	0.24738	0.25001	0.57807	0.89896	0.86015
MERGE.43735.1	-1.6502806116696	0.00437723	0.402953	down	5:+:9313642-9314492	MERGE.43735	5:+:9313642-9314492	-	-	-	-	-	-	1.01226	0.43409	0.8826	2.09661	2.42624	2.77848
MERGE.52011.1	3.02285	0.0200749	0.667052	up	7:-:31130076-31156177	MERGE.52011	7:-:31130076-31156177	-	-	-	-	-	-	4.54129	3.17702	4.39119	0.39946	2.91552	0.11542
MERGE.40466.1	-1.49055135496986	0.0157459	0.63393	down	4:+:42173207-42182532	MERGE.40466	4:+:42173207-42182532	-	-	-	-	-	-	1.83208	0.67662	1.11368	5.11245	3.13213	2.20807
MERGE.2808.1	-5.60611669137978	0.000418347	0.126592	down	1:-:139602427-140120211	MERGE.2808	1:-:139602427-140183764	-	-	-	-	-	-	0	0	0	0.58094	0.4916	2.28128
NONMMUT146027.1	1.68403	0.014551	0.624266	up	19:-:6527239-6529998	NONMMUG091924.1	19:-:6527239-6529998	19:-:6527239-6529998	NONMMUG091924.1	-	-	-	lncRNA	1.64837	0.48729	1.06488	0.42196	0.35053	0.19793
MERGE.59538.14	9.34641	0.0133704	0.608674	up	9:-:36729615-36767619	MERGE.59538	9:-:36708482-36767679	-	-	-	-	-	-	16.1801	22.9943	21.6576	16.363	0	0
MERGE.33708.1	-1.27604245540549	0.0259479	0.706265	down	2:+:112589739-112590294	MERGE.33708	2:+:112589739-112590294	-	-	-	-	-	-	1.44249	1.19202	0.72905	2.23443	2.45094	3.89829
NONMMUT149954.1	-5.09963797024888	0.0271875	0.714183	down	6:+:49087149-49088048	MERGE.48568	6:+:49087149-49088048	6:+:49087149-49088048	NONMMUG094257.1	-	-	-	lncRNA	4.51012	0	0	3.15994	1.87375	2.38257
NONMMUT054830.2	-1.05661600749084	0.0234325	0.693117	down	5:-:135471779-135473419	MERGE.46764	5:-:135471779-135473419	5:-:135471779-135473419	NONMMUG034017.2	-	-	-	lncRNA	1.72869	0.64223	0.82823	2.34368	2.28995	1.85256
MERGE.40775.1	-1.57529941406608	0.0474864	0.730234	down	4:-:53944392-53944810	MERGE.40775	4:-:53944392-53944810	-	-	-	-	-	-	0.5317	0.25931	0.17072	0.82011	1.24837	0.60463
NONMMUT047165.2	1.30447	0.0245955	0.699245	up	4:-:47015653-47016638	MERGE.40677	4:-:47015365-47057427	4:-:47015653-47016638	NONMMUG029172.2	-	-	-	lncRNA	0.97911	0.84848	1.33006	0.34851	0.39089	0.62806
MERGE.23706.1	-7.23543801245583	6.74399e-06	0.0101686	down	16:+:55324227-55324814	MERGE.23706	16:+:55324227-55324814	-	-	-	-	-	-	0	0	0	2.33759	1.6855	1.24467
NONMMUT019387.2	-1.36214550507264	0.00724899	0.494914	down	13:+:113853995-113856730	MERGE.16997	13:+:113853995-113856730	13:+:113853995-113856730	NONMMUG012019.2	-	-	-	lncRNA	1.17798	0.44477	0.902	2.28485	1.85645	2.35087
NONMMUT111701.1	1.9036	0.00451704	0.409442	up	3:+:98286988-98290056	MERGE.38272	3:+:98286988-98290677	3:+:98286988-98290056	NONMMUG027379.2	-	-	-	lncRNA	2.15356	0.93462	0.9401	0.45217	0.22874	0.42191
MERGE.16008.1	-8.10891259033749	4.49215e-05	0.0326803	down	13:-:68444299-68445228	MERGE.16008	13:-:68444299-68445228	-	-	-	-	-	-	0	0.04673	0	3.63806	3.99626	4.14663
MERGE.30546.3	5.32502	0.0365389	0.730234	up	19:-:46391229-46395732	MERGE.30546	19:-:46376814-46395735	-	-	-	-	-	-	3.2139	0.91388	0.98565	2.0998	0	0
NONMMUT045017.2	3.74395	0.00262251	0.321365	up	3:-:121202013-121203722	MERGE.38794	3:-:121201761-121283098	3:-:121202013-121203722	NONMMUG027780.2	-	-	-	lncRNA	0.67747	1.19451	0.68326	0.03092	0.0805	0.09054
NONMMUT064650.2	-1.19944860004733	0.0335015	0.730234	down	8:+:12983897-12987048	MERGE.55207	8:+:12873806-13020905	8:+:12983897-12987048	NONMMUG039911.2	-	-	-	lncRNA	1.65863	0.78937	2.21271	2.38164	4.3452	4.31786
NONMMUT054831.2	-1.49185858383005	0.022333	0.686766	down	5:-:135493972-135496210	MERGE.46765	5:-:135493972-135496210	5:-:135493972-135496210	NONMMUG034018.2	-	-	-	lncRNA	1.26035	0.25234	0.63365	1.8889	1.48776	1.83551
NONMMUT032334.2	-1.17205259381696	0.0242409	0.698557	down	18:+:50065806-50068795	MERGE.28202	18:+:50065806-50068795	18:+:50065806-50068795	NONMMUG019905.2	-	-	-	lncRNA	1.22693	0.45059	0.58614	1.32164	1.5238	2.29238
NONMMUT002398.2	1.44762	0.0462004	0.730234	up	1:+:121336745-121338914	MERGE.2171	1:+:121336745-121339261	1:+:121336745-121338914	NONMMUG001611.2	-	-	-	lncRNA	1.10194	0.30542	0.60435	0.23144	0.13321	0.35672
NONMMUT060050.2	-1.08929144460931	0.0114188	0.581569	down	7:-:16346287-16348226	MERGE.51372	7:-:16346287-16348226	7:-:16346287-16348226	NONMMUG037309.2	-	-	-	lncRNA	0.94167	0.50405	0.52851	1.36933	1.60354	1.34214
MERGE.58325.1	1.01936	0.00998289	0.561176	up	8:+:124738395-124744695	MERGE.58325	8:+:124738395-124744695	-	-	-	-	-	-	3.29527	1.70364	2.3481	1.33192	1.17529	1.23522
MERGE.6939.3	1.32436	0.0238518	0.694563	up	10:-:117349042-117376928	MERGE.6939	10:-:117344673-117380015	-	-	-	-	-	-	1.10609	1.30146	1.92017	0.46249	0.51873	0.92187
MERGE.6939.5	2.18762	0.0184386	0.656166	up	10:-:117349042-117376920	MERGE.6939	10:-:117344673-117380015	-	-	-	-	-	-	1.25383	1.71636	2.07342	0.20591	0.24936	1.17796
NONMMUT044249.2	1.30309	0.00286979	0.338094	up	3:+:96239393-96241819	MERGE.38160	3:+:96239393-96241819	3:+:96239393-96241819	NONMMUG027312.2	-	-	-	lncRNA	2.44784	1.9429	2.80001	1.15446	0.9982	0.96265
MERGE.35532.1	1.11559	0.0139706	0.61557	up	2:+:167837089-167838795	MERGE.35532	2:+:167837089-167838795	-	-	-	-	-	-	3.47162	1.64216	2.06036	1.02975	1.01604	1.36868
NONMMUT013350.2	-1.93531755790066	0.0244786	0.699245	down	12:+:8453504-8454918	MERGE.11543	12:+:8453504-8454918	12:+:8453504-8454918	NONMMUG008475.2	-	-	-	lncRNA	0.35687	0.06143	0.10111	0.49503	0.74904	0.33818
MERGE.45326.17	-1.03460483127956	0.0229597	0.690924	down	5:-:90228741-90365410	MERGE.45326	5:-:90214724-90366577	-	-	-	-	-	-	1.2833	0.83831	1.36919	2.29859	3.46662	1.68008
NONMMUT100985.1	-5.52369583773315	0.0151047	0.628198	down	17:+:35994516-35997366	MERGE.25800	17:+:35994453-36038435	17:+:35994516-35997366	NONMMUG018236.2	-	-	-	lncRNA	0	1.85094	0	2.76936	3.56433	3.88423
MERGE.32886.1	1.30976	0.047074	0.730234	up	2:+:72445393-72447333	MERGE.32886	2:+:72445393-72447333	-	-	-	-	-	-	2.63224	0.73329	0.78007	0.40854	0.46805	0.60909
NONMMUT009948.2	2.28723	0.00827836	0.524359	up	11:-:58976315-58976852	MERGE.8694	11:-:58965748-58978051	11:-:58976315-58976852	NONMMUG006241.2	-	-	-	lncRNA	1.24229	0.74722	0.68696	0.27022	0.12793	0.1308
NONMMUT045113.2	3.9324	0.0414529	0.730234	up	3:+:123264843-123267178	MERGE.38989	3:+:123264830-123365641	3:+:123264843-123267178	NONMMUG027833.2	-	-	-	lncRNA	2.34209	5.72502	1.32978	0.81332	0.26471	0
NONMMUT117506.1	2.27414	0.0382865	0.730234	up	4:-:137307233-137307864	MERGE.42749	4:-:137306030-137307864	4:-:137307233-137307864	NONMMUG073705.1	-	-	-	lncRNA	1.64503	0.46417	0.67911	0.50189	0.1089	0.06681
NONMMUT030856.2	4.2782	0.00100559	0.208208	up	17:+:83433438-83435934	MERGE.26859	17:+:83350931-83480826	17:+:83433438-83435934	NONMMUG019027.2	-	-	-	lncRNA	5.31756	1.32277	1.53264	0.12703	0.13781	0.09018
NONMMUT100374.1	1.35879	0.0410483	0.730234	up	16:-:90340740-90341632	MERGE.24144	16:-:90340740-90341632	16:-:90340740-90341632	NONMMUG062788.1	-	-	-	lncRNA	1.43034	1.25319	0.68088	0.6512	0.47784	0.25217
NONMMUT070610.2	-1.69889271948737	0.0184327	0.656166	down	9:-:97928606-97930155	MERGE.61281	9:-:97928606-97930155	9:-:97928606-97930155	NONMMUG043703.2	-	-	-	lncRNA	1.24568	0.26637	0.53073	1.27048	2.39775	2.23373
MERGE.35267.5	-2.1204723338455	0.000555913	0.150198	down	2:-:160757148-160872990	MERGE.35267	2:-:160743927-160888028	-	-	-	-	-	-	0.63222	0.59335	0.70157	2.09843	2.72603	4.36867
MERGE.54641.1	-1.21530766628309	0.0219998	0.6839	down	7:+:131380929-131382468	MERGE.54641	7:+:131380929-131382468	-	-	-	-	-	-	0.79084	0.73374	0.49547	1.19291	1.69826	2.24824
MERGE.62241.1	-1.16019017189383	0.0162208	0.637765	down	JH584294.1:+:35589-39698	MERGE.62241	JH584294.1:+:35589-39698	-	-	-	-	-	-	3.02105	1.06535	1.75496	4.17072	3.58691	5.12292
NONMMUT145742.1	-3.72167241933714	0.0130516	0.604811	down	18:-:79109917-79110156	MERGE.28894	18:-:79109917-79110156	18:-:79109917-79110156	NONMMUG091751.1	-	-	-	lncRNA	0	0.18108	0	0.60575	1.43384	0.35186
NONMMUT039521.2	-1.0001036037768	0.0106204	0.572356	down	2:+:121920085-121923098	MERGE.34020	2:+:121918742-121923098	2:+:121920085-121923098	NONMMUG024438.2	-	-	-	lncRNA	2.87782	2.235	2.74518	7.20894	4.96888	4.74904
MERGE.8858.2	-1.40219004457909	0.00835896	0.526566	down	11:-:61775649-61854634	MERGE.8858	11:-:61775649-61855073	-	-	-	-	-	-	6.13765	13.8397	14.9194	27.3061	31.2685	28.6782
MERGE.30022.4	8.27995	0.00841933	0.528622	up	19:-:29714403-29754443	MERGE.30022	19:-:29714402-29805989	-	-	-	-	-	-	3.88041	3.3217	3.8246	0	0	2.13001
NONMMUT006914.2	-1.03440122829354	0.0280179	0.718721	down	10:+:94397471-94398810	MERGE.6520	10:+:94397471-94398810	10:+:94397471-94398810	NONMMUG004448.2	-	-	-	lncRNA	1.9175	0.6892	1.29898	2.68273	2.24963	2.96191
MERGE.22703.3	9.17923	2.07825e-05	0.0205266	up	16:-:13833148-13838361	MERGE.22703	16:-:13831237-13903131	-	-	-	-	-	-	1.35021	3.16301	1.62888	0	0	0
MERGE.28199.1	-1.09109367242082	0.0110482	0.578932	down	18:+:50055692-50060294	MERGE.28199	18:+:50055692-50060294	-	-	-	-	-	-	1.61333	0.89932	0.83401	2.19077	2.19197	3.03318
MERGE.10955.1	-1.32226316111717	0.00813362	0.521718	down	11:-:114660142-114661617	MERGE.10955	11:-:114660142-114661617	-	-	-	-	-	-	1.06663	0.48583	0.92082	1.84457	1.99572	2.46968
MERGE.38431.8	8.56788	5.77744e-06	0.00947535	up	3:-:104457128-104511840	MERGE.38431	3:-:104396418-104511918	-	-	-	-	-	-	0.5916	0.83424	0.49051	0	0	0
MERGE.1882.1	-2.01176082666789	0.00303237	0.345106	down	1:+:93908440-93908905	MERGE.1882	1:+:93908440-93908905	-	-	-	-	-	-	0.89241	0.44299	0.86986	3.63026	3.24922	2.17458
MERGE.40742.1	1.19821	0.0078332	0.510652	up	4:-:52683182-52683661	MERGE.40742	4:-:52683182-52683661	-	-	-	-	-	-	6.52882	5.93048	6.15977	2.28534	3.44122	3.07876
NONMMUT098366.1	-3.43092685698089	0.00180669	0.271973	down	16:+:40029522-40031699	NONMMUG061472.1	16:+:40029522-40031699	16:+:40029522-40031699	NONMMUG061472.1	-	-	-	lncRNA	0.05455	0.05986	0.03284	0.49152	0.4108	0.82714
MERGE.62239.1	-1.61661640745111	0.00568539	0.447948	down	JH584294.1:+:24481-27502	MERGE.62239	JH584294.1:+:24481-27502	-	-	-	-	-	-	0.82076	0.33077	0.54443	2.49283	1.55777	1.29938
NONMMUT101685.1	-1.19114754519983	0.0217511	0.681365	down	17:-:4979260-4982773	NONMMUG063630.1	17:-:4979260-4982773	17:-:4979260-4982773	NONMMUG063630.1	-	-	-	lncRNA	0.3339	0.28755	0.14928	0.59049	0.64633	0.54471
MERGE.25466.2	-1.01773437300165	0.0199795	0.666103	down	17:-:31646162-31659137	MERGE.25466	17:-:31645521-31659137	-	-	-	-	-	-	1.00938	0.72738	1.3147	2.20624	2.69074	1.65197
MERGE.41258.1	-1.34018031974216	0.0349927	0.730234	down	4:+:85543825-85545216	MERGE.41258	4:+:85543825-85545216	-	-	-	-	-	-	0.82157	0.49954	0.34259	0.97794	1.19652	2.3255
MERGE.54275.8	5.88992	0.0444574	0.730234	up	7:-:126491715-126502412	MERGE.54275	7:-:126491708-126503437	-	-	-	-	-	-	1.40821	1.69606	0.39969	1.58541	0	0
MERGE.5366.1	-1.08462584600124	0.0130662	0.604811	down	10:-:53649697-53652174	MERGE.5366	10:-:53649697-53652174	-	-	-	-	-	-	1.36655	0.80238	1.01516	2.69875	1.72755	2.8569
MERGE.6966.1	-2.41486571881497	0.0245879	0.699245	down	10:-:119022616-119023892	MERGE.6966	10:-:119022616-119023892	-	-	-	-	-	-	0.51175	0.06807	0.22407	0.86936	0.64674	2.24837
MERGE.46306.5	1.29588	0.0292872	0.726531	up	5:-:121815648-121837646	MERGE.46306	5:-:121814197-121838926	-	-	-	-	-	-	8.11882	3.07959	5.26137	2.18203	1.40004	3.51435
NONMMUT026607.2	-5.21820483542213	0.00279352	0.331828	down	16:+:40282985-40284709	NONMMUG016484.2	16:+:40282985-40284709	16:+:40282985-40284709	NONMMUG016484.2	-	-	-	lncRNA	0.11193	0	0.02765	0.63592	0.81392	1.05252
MERGE.64398.1	-7.01867757078655	2.32369e-05	0.022166	down	Y:-:10706659-10707173	MERGE.64398	Y:-:10706659-10707173	-	-	-	-	-	-	0	0	0.0463	2.05303	2.69952	2.73288
MERGE.33707.1	-1.18599588274487	0.0103549	0.568498	down	2:+:112571232-112573281	MERGE.33707	2:+:112571232-112573281	-	-	-	-	-	-	1.13022	0.6837	0.7037	1.61176	1.88008	2.6501
NONMMUT057283.2	-6.52544768982904	9.19147e-06	0.0123633	down	6:+:67066848-67074566	MERGE.48944	6:+:67036599-67080655	6:+:67066848-67074566	NONMMUG035566.3	-	-	-	lncRNA	0	0	0	0.53292	0.61054	0.72358
NONMMUT096884.1	5.84307	0.0185802	0.656761	up	15:-:36467983-36470651	MERGE.20553	15:-:36467983-36471304	15:-:36467983-36470651	NONMMUG060552.1	-	-	-	lncRNA	1.73063	0.54956	0.84871	0.77744	0	0
MERGE.4627.1	-1.12978131500446	0.0270102	0.71327	down	10:+:18329191-18330974	MERGE.4627	10:+:18329191-18330974	-	-	-	-	-	-	0.59942	0.73083	0.66828	2.12618	1.0802	1.70407
MERGE.4629.1	-1.41563151257708	0.00116361	0.218431	down	10:+:18334102-18337703	MERGE.4629	10:+:18334102-18337703	-	-	-	-	-	-	1.09681	0.70583	0.78113	2.51339	2.59859	2.18813
NONMMUT077269.1	-2.40424114157612	0.00910084	0.542027	down	1:-:6195273-6196193	MERGE.19	1:-:6195273-6196193	1:-:6195273-6196193	NONMMUG047930.1	-	-	-	lncRNA	0.12901	0.12977	0.05178	0.4879	0.47826	0.70295
MERGE.41595.1	-3.87563090807333	0.000317272	0.108445	down	4:-:101863323-101863604	MERGE.41595	4:-:101863323-101863604	-	-	-	-	-	-	0.42134	0.50087	0.76099	10.6856	6.34551	10.3811
NONMMUT065387.2	1.31992	0.00858202	0.530055	up	8:+:41021464-41024454	MERGE.55745	8:+:41017468-41042054	8:+:41021464-41024454	NONMMUG040430.2	-	-	-	lncRNA	3.7739	3.19302	1.98104	1.63051	1.16433	0.97876
NONMMUT046926.2	-2.56378952030789	0.0179599	0.65212	down	4:+:42830028-42832366	MERGE.40411	4:+:42826532-42832366	4:+:42830028-42832366	NONMMUG029007.2	-	-	-	lncRNA	0.19685	0.7618	0.08665	1.26005	1.35354	2.20231
NONMMUT119739.1	1.14034	0.0254932	0.704253	up	5:+:145255659-145261801	MERGE.47234	5:+:145253843-145263672	5:+:145255659-145261801	NONMMUG034303.2	-	-	-	lncRNA	4.07634	1.44501	2.86651	1.14027	1.1383	1.51672
NONMMUT044694.2	-1.01946758865699	0.00479813	0.415288	down	3:+:107039504-107054347	MERGE.38561	3:+:107039504-107054347	3:+:107039504-107054347	NONMMUG027595.2	-	-	-	lncRNA	2.25091	2.3919	2.55398	4.89118	4.5677	5.92138
MERGE.33702.1	-1.20864496670616	0.00730875	0.4969	down	2:+:112534396-112539339	MERGE.33702	2:+:112534396-112539339	-	-	-	-	-	-	1.29176	0.87465	0.59804	2.02897	2.20784	2.31441
NONMMUT105846.1	-1.50497089048185	0.0020401	0.28636	down	19:-:8492241-8494784	MERGE.29422	19:-:8492241-8494784	19:-:8492241-8494784	NONMMUG066155.1	-	-	-	lncRNA	0.63636	0.35021	0.45926	1.24683	1.45007	1.57672
MERGE.59518.2	-7.25614326367282	0.00643499	0.471725	down	9:-:35217020-35250300	MERGE.59518	9:-:35216965-35267805	-	-	-	-	-	-	1.20929	0	0	2.06909	2.09437	2.34499
NONMMUT048005.2	-1.25261652091759	0.0186257	0.65719	down	4:-:87973906-87983292	MERGE.41355	4:-:87973906-87983292	4:-:87973906-87983292	NONMMUG029780.2	-	-	-	lncRNA	2.7641	1.17409	0.94068	3.18508	4.26168	3.71775
NONMMUT105979.1	4.37485	0.024532	0.699245	up	19:-:22996839-23000506	MERGE.29793	19:-:22978016-23075924	19:-:22996839-23000506	NONMMUG021014.3	-	-	-	lncRNA	1.12283	1.07064	0.56565	0.62706	0.03588	0
NONMMUT029772.2	-5.96871442194233	0.00972653	0.556654	down	17:+:45433831-45441562	MERGE.25927	17:+:45433390-45444398	17:+:45433831-45441562	NONMMUG018391.2	-	-	-	lncRNA	0.30994	0.00366	0	0.5783	0.71349	1.75278
MERGE.21286.29	-8.06008665246285	0.000195946	0.0799902	down	15:-:76181795-76199862	MERGE.21286	15:-:76170806-76248641	-	-	-	-	-	-	0	0	0	0.30437	1.08155	0.19702
NONMMUT021961.2	-1.35432834523729	0.0230989	0.692137	down	14:-:98111226-98112305	MERGE.19485	14:-:98111226-98112305	14:-:98111226-98112305	NONMMUG013639.2	-	-	-	lncRNA	1.56774	0.44265	0.7065	1.59086	2.34513	2.5412
MERGE.30303.1	8.45012	0.00142391	0.237566	up	19:-:40593548-40612188	MERGE.30303	19:-:40593548-40612233	-	-	-	-	-	-	1.30891	2.42571	1.10631	0.07765	0	0
NONMMUT145683.1	-6.04435252329325	3.01695e-05	0.025994	down	18:-:68691028-68691811	MERGE.28673	18:-:68691028-68691811	18:-:68691028-68691811	NONMMUG091735.1	-	-	-	lncRNA	0	0	0	0.50573	0.42137	0.78989
MERGE.22803.1	1.06472	0.0152536	0.629162	up	16:-:16749948-16751356	MERGE.22803	16:-:16749948-16751356	-	-	-	-	-	-	2.48768	2.05116	2.13228	0.95676	0.99646	1.55827
MERGE.64423.1	2.46808	0.0224874	0.687783	up	Y:-:43040818-43041065	MERGE.64423	Y:-:43040818-43041065	-	-	-	-	-	-	1.19777	1.84004	3.17283	0.31975	0.22201	0.56751
MERGE.64379.1	5.48272	0.0267883	0.712051	up	Y:+:901492-902468	MERGE.64379	Y:+:901492-902468	-	-	-	-	-	-	3.66367	1.42346	2.35514	3.24661	0	0
NONMMUT075146.1	-1.64081350807445	0.00223326	0.300023	down	1:+:23324624-23325434	MERGE.369	1:+:23324624-23325434	1:+:23324624-23325434	NONMMUG046593.1	-	-	-	lncRNA	1.28195	0.83062	0.79383	3.92744	2.68169	2.91552
MERGE.50673.1	-1.02635355618775	0.0406613	0.730234	down	6:+:134139606-134140614	MERGE.50673	6:+:134139606-134140614	-	-	-	-	-	-	4.43066	1.31371	2.04413	4.388	5.81154	4.84023
NONMMUT083715.1	1.80145	0.0241063	0.697329	up	11:+:57562106-57563396	MERGE.8626	11:+:57562106-57563396	11:+:57562106-57563396	NONMMUG052130.1	-	-	-	lncRNA	3.0717	0.70694	1.58839	0.50163	0.67172	0.26165
NONMMUT150327.1	-1.25791002435788	0.0459856	0.730234	down	6:-:31125579-31126088	MERGE.48018	6:-:31125579-31126088	6:-:31125579-31126088	NONMMUG094490.1	-	-	-	lncRNA	3.58202	0.85216	3.08573	5.20882	5.96478	4.80183
MERGE.53803.1	-1.08201083941253	0.0243283	0.698557	down	7:-:106617169-106618594	MERGE.53803	7:-:106617169-106618594	-	-	-	-	-	-	1.37483	0.54858	0.69393	2.0668	1.42861	1.97396
NONMMUT109954.1	-1.27798479580377	0.0498857	0.730234	down	2:-:151961380-151962762	MERGE.34891	2:-:151961380-151963741	2:-:151961380-151962762	NONMMUG068772.2	-	-	-	lncRNA	0.50912	0.1798	0.47914	1.1248	1.04131	0.56564
NONMMUT128747.1	5.61006	0.00152056	0.246998	up	8:+:61428427-61439338	MERGE.56361	8:+:61428427-61439338	8:+:61428427-61439338	NONMMUG080816.1	-	-	-	lncRNA	0.81537	0.36706	0.57899	0.00558	0.05813	0
NONMMUT011423.2	-1.17690226625738	0.0488728	0.730234	down	11:-:88432986-88433514	MERGE.10036	11:-:88432986-88433514	11:-:88432986-88433514	NONMMUG007220.2	-	-	-	lncRNA	0.50489	0.36935	0.40529	1.01089	0.97485	0.99677
MERGE.53912.5	6.60529	0.0182096	0.654393	up	7:-:111725239-111726518	MERGE.53912	7:-:111471661-111779977	-	-	-	-	-	-	9.20314	4.62075	6.2912	0	0	8.19165
NONMMUT018146.2	-1.20018620099807	0.0178454	0.651153	down	13:-:68900990-68903445	MERGE.16020	13:-:68900990-68903445	13:-:68900990-68903445	NONMMUG011332.2	-	-	-	lncRNA	0.73173	0.28755	0.38834	0.82872	1.17696	1.20342
NONMMUT120189.1	1.65005	0.0482707	0.730234	up	5:-:33239997-33240965	NONMMUG075377.1	5:-:33239997-33240965	5:-:33239997-33240965	NONMMUG075377.1	-	-	-	lncRNA	0.49048	0.5382	0.66439	0.0682	0.31252	0.27597
MERGE.12378.1	-5.20773471342418	0.0179958	0.652566	down	12:-:52727396-52730778	MERGE.12378	12:-:52727396-52730778	-	-	-	-	-	-	0	0.04175	0.86694	1.34391	2.29076	2.73333
NONMMUT030878.2	-2.05753103338987	0.0324337	0.730234	down	17:+:83812152-83814905	MERGE.26865	17:+:83706163-83823714	17:+:83812152-83814905	NONMMUG019043.2	-	-	-	lncRNA	0.31819	0.28405	0.58442	3.18173	2.45409	0.58771
NONMMUT078470.1	1.53298	0.0111784	0.579911	up	1:-:118268843-118269712	NONMMUG048743.1	1:-:118268843-118269712	1:-:118268843-118269712	NONMMUG048743.1	-	-	-	lncRNA	1.57059	0.73682	1.00036	0.33421	0.49047	0.30737
NONMMUT005139.2	-2.79168997102971	0.0361701	0.730234	down	10:+:29228007-29230778	MERGE.4905	10:+:29143839-29230779	10:+:29228007-29230778	NONMMUG003295.2	-	-	-	lncRNA	0.06965	0.07839	0.07742	0.18595	1.43012	0.69052
NONMMUT026599.2	-6.35310331407221	7.78911e-05	0.0449477	down	16:+:40002464-40003855	NONMMUG016477.2	16:+:40002464-40003855	16:+:40002464-40003855	NONMMUG016477.2	-	-	-	lncRNA	0	0.01561	0.00856	0.72158	0.64276	0.69765
MERGE.34418.1	-2.74196625123756	0.00467399	0.413963	down	2:-:134762051-134762330	MERGE.34418	2:-:134762051-134762330	-	-	-	-	-	-	0.53044	0.54325	0.34063	2.45447	5.45679	2.7646
MERGE.63012.4	1.00928	0.0365657	0.730234	up	X:-:73942797-73955626	MERGE.63012	X:-:73942792-73966948	-	-	-	-	-	-	16.1445	17.3533	8.30172	9.26641	5.41263	6.24996
MERGE.10176.3	6.73742	0.0155052	0.632225	up	11:-:95274259-95310201	MERGE.10176	11:-:95267369-95325423	-	-	-	-	-	-	2.07835	1.31746	2.42826	0	0	1.91942
NONMMUT038700.2	-6.44890831522885	0.0122365	0.593636	down	2:+:94406757-94412468	MERGE.33403	2:+:94406151-94419066	2:+:94406757-94412468	NONMMUG023892.2	-	-	-	lncRNA	1.63241	0	0	2.29799	1.28968	1.76246
NONMMUT033554.2	3.94975	0.0436633	0.730234	up	19:+:5406874-5422847	MERGE.29211	19:+:5406620-5422847	19:+:5406874-5422847	NONMMUG020648.2	-	-	-	lncRNA	1.45279	1.4239	1.30204	0.54598	0.47713	0
MERGE.21793.5	-1.59384013765352	0.0284704	0.722074	down	15:-:83376122-83449118	MERGE.21793	15:-:83374666-83464606	-	-	-	-	-	-	1.26146	0.41237	0.64287	1.50179	1.66287	4.67408
MERGE.62643.1	1.51451	0.0118078	0.587617	up	X:+:32503032-32503442	MERGE.62643	X:+:32503032-32503442	-	-	-	-	-	-	3.0355	3.38375	3.36489	0.90039	1.87551	1.02732
NONMMUT059144.2	1.44483	0.0295809	0.728221	up	6:+:133110474-133112301	MERGE.50651	6:+:133104909-133112301	6:+:133110474-133112301	NONMMUG036745.2	-	-	-	lncRNA	3.00621	1.688	1.13482	0.99051	0.94125	0.35417
MERGE.35957.4	-7.24473542992275	0.00547749	0.439344	down	2:-:181227622-181242025	MERGE.35957	2:-:181227615-181242027	-	-	-	-	-	-	0.21861	0	0.15559	3.65198	2.67977	4.37657
MERGE.5499.1	2.44547	0.0052458	0.431445	up	10:+:60388712-60389223	MERGE.5499	10:+:60388712-60389223	-	-	-	-	-	-	2.58175	1.18836	1.69984	0.3872	0.16131	0.4948
NONMMUT067860.2	5.61141	0.0200357	0.666829	up	9:-:3003785-3023652	MERGE.58457	9:-:3000282-3168181	9:-:3003785-3023652	NONMMUG042010.2	-	-	-	lncRNA	4.59831	2.42844	4.48067	4.02619	0	0
MERGE.50520.1	2.2891	0.00720985	0.494666	up	6:+:127834982-127836653	MERGE.50520	6:+:127834982-127836653	-	-	-	-	-	-	3.01132	1.20867	2.18192	0.22133	0.39516	0.95961
MERGE.19756.1	-5.94917617963374	0.0108962	0.576629	down	14:+:119697898-119699109	MERGE.19756	14:+:119697898-119699109	-	-	-	-	-	-	1.47052	0	0	1.91921	1.59	2.27605
MERGE.25068.1	-2.15179132492854	0.0361524	0.730234	down	17:-:24338138-24338549	MERGE.25068	17:-:24338138-24338549	-	-	-	-	-	-	0.28839	0.10549	0.28937	1.89264	1.0023	0.47825
NONMMUT048505.2	-1.15031091068693	0.00965373	0.555192	down	4:+:107021307-107023158	MERGE.41698	4:+:107021307-107023158	4:+:107021307-107023158	NONMMUG030107.2	-	-	-	lncRNA	0.93829	0.72746	0.70168	1.54144	2.38581	1.79349
NONMMUT010802.2	2.52058	0.0200938	0.667303	up	11:-:77050637-77052075	MERGE.9505	11:-:77035359-77078437	11:-:77050637-77052075	NONMMUG006810.2	-	-	-	lncRNA	1.52755	0.9891	1.16819	0.08266	0.12435	1.01719
MERGE.54928.7	4.83575	0.00589802	0.45614	up	7:-:144588550-144669377	MERGE.54928	7:-:144588512-144751974	-	-	-	-	-	-	4.11833	6.41526	17.2756	1.58136	0.04753	0.28102
NONMMUT030783.2	-1.68183776873199	0.0208393	0.675071	down	17:+:81341623-81358314	MERGE.26833	17:+:81341623-81358314	17:+:81341623-81358314	NONMMUG018988.2	-	-	-	lncRNA	1.3685	0.38278	0.8562	1.55803	3.4692	3.16577
NONMMUT026884.2	-1.13905172090911	0.0195733	0.662605	down	16:-:50232475-50233744	MERGE.23686	16:-:50232475-50233744	16:-:50232475-50233744	NONMMUG016674.2	-	-	-	lncRNA	1.49692	0.57319	0.89181	1.82116	2.09183	2.55998
MERGE.50604.28	8.10059	0.000900213	0.199905	up	6:+:129018629-129186534	MERGE.50604	6:+:128887436-129186534	-	-	-	-	-	-	4.14296	0.3218	0.65485	0	0	0
MERGE.62370.6	4.24969	0.00393764	0.382844	up	X:-:7731746-7741308	MERGE.62370	X:-:7731683-7750905	-	-	-	-	-	-	0.43619	0.54644	1.33927	0.02426	0.05053	0.03617
NONMMUT009710.2	5.9312	0.0230965	0.692137	up	11:+:52232038-52234627	MERGE.8488	11:+:52231995-52246858	11:+:52232038-52234627	NONMMUG006076.2	-	-	-	lncRNA	2.22037	0.88788	1.01121	0	1.61532	0
NONMMUT094819.1	-1.31617977778163	0.0451742	0.730234	down	14:-:100191989-100193960	MERGE.19561	14:-:100191846-100219966	14:-:100191989-100193960	NONMMUG059198.1	-	-	-	lncRNA	0.64772	0.2314	0.28415	0.52276	1.27737	1.12766
MERGE.58561.1	1.07769	0.0463111	0.730234	up	9:-:8040239-8041430	MERGE.58561	9:-:8040239-8041430	-	-	-	-	-	-	2.86579	1.54954	1.6603	1.20855	0.56584	1.40507
NONMMUT097493.1	1.61721	0.00411271	0.39092	up	15:-:83288640-83291343	MERGE.21784	15:-:83271192-83291343	15:-:83288640-83291343	NONMMUG060957.1	-	-	-	lncRNA	1.67528	0.75139	1.10227	0.53276	0.34616	0.3071
MERGE.33857.1	-1.65054952919624	0.00701473	0.487736	down	2:+:118819603-118822099	MERGE.33857	2:+:118819603-118822099	-	-	-	-	-	-	0.14275	0.26542	0.19576	0.66161	0.66702	0.69329
MERGE.15435.1	1.93639	0.00102612	0.209443	up	13:-:54584185-54611344	MERGE.15435	13:-:54584185-54611344	-	-	-	-	-	-	1.37785	1.39723	1.36918	0.56442	0.38529	0.26339
NONMMUT010811.2	-1.05359047544858	0.0239086	0.694917	down	11:+:77228047-77229727	MERGE.9524	11:+:77228047-77229727	11:+:77228047-77229727	NONMMUG006817.2	-	-	-	lncRNA	2.33254	1.26683	0.91491	2.88544	2.98062	3.50812
MERGE.22100.4	1.76207	0.036995	0.730234	up	15:-:98041232-98092887	MERGE.22100	15:-:98038744-98093744	-	-	-	-	-	-	0.79475	0.45604	0.79305	0.51257	0.24327	0.06564
MERGE.30857.1	-4.47395878570766	0.00234055	0.304775	down	19:-:59604712-59605665	MERGE.30857	19:-:59604712-59605665	-	-	-	-	-	-	0.18682	0.06833	0.02499	1.03903	1.57272	2.24245
NONMMUT132157.1	1.20893	0.0423538	0.730234	up	9:+:22951266-22952303	NONMMUG083185.1	9:+:22951266-22952303	9:+:22951266-22952303	NONMMUG083185.1	-	-	-	lncRNA	0.84421	0.37682	0.45943	0.19099	0.25196	0.24406
NONMMUT054298.2	1.41302	0.0449905	0.730234	up	5:-:121530563-121530895	MERGE.46287	5:-:121530563-121530895	5:-:121530563-121530895	NONMMUG033677.2	-	-	-	lncRNA	1.69486	0.78306	1.32468	0.59533	0.28935	0.50718
MERGE.16036.1	1.17523	0.0309524	0.730234	up	13:+:69637094-69638656	MERGE.16036	13:+:69637094-69638656	-	-	-	-	-	-	3.56341	1.11222	2.09	0.83712	1.16249	0.90047
MERGE.53806.1	-1.19909231411857	0.0314169	0.730234	down	7:-:106627104-106628366	MERGE.53806	7:-:106627104-106628366	-	-	-	-	-	-	0.67029	0.44733	0.47198	1.50686	0.7847	1.7384
MERGE.49271.1	4.62429	0.0255423	0.70488	up	6:-:84571106-84587671	MERGE.49271	6:-:84571106-84593908	-	-	-	-	-	-	11.6729	48.2439	1.06645	0.26555	0.56113	0.30183
NONMMUT056342.2	1.24986	0.0387511	0.730234	up	6:-:35043222-35045104	MERGE.48102	6:-:35021813-35133758	6:-:35043222-35045104	NONMMUG034993.2	-	-	-	lncRNA	3.00516	1.93874	1.54488	1.80383	0.81873	0.53816
MERGE.11851.1	1.09716	0.0197093	0.663933	up	12:-:23597705-23598734	MERGE.11851	12:-:23597705-23598734	-	-	-	-	-	-	2.10528	2.32068	2.50018	1.03935	0.98893	1.50309
NONMMUT038395.2	2.52541	0.0190879	0.659173	up	2:-:90674207-90677165	MERGE.33223	2:-:90674207-90677165	2:-:90674207-90677165	NONMMUG023725.2	-	-	-	lncRNA	0.9336	0.20195	0.58422	0.03573	0.1349	0.11891
MERGE.11553.1	-2.68645084101299	0.0074398	0.500531	down	12:+:8531779-8532353	MERGE.11553	12:+:8531779-8532353	-	-	-	-	-	-	0.59409	0.4535	0.1244	1.49403	2.5854	2.59457
MERGE.48713.1	-1.39205241131549	0.00908328	0.542027	down	6:+:54124476-54126098	MERGE.48713	6:+:54124476-54126098	-	-	-	-	-	-	1.77532	0.65605	1.19001	2.45924	3.27372	3.85895
NONMMUT029323.2	2.19823	0.045298	0.730234	up	17:+:34601151-34601576	MERGE.25641	17:+:34601151-34601576	17:+:34601151-34601576	NONMMUG018130.2	-	-	-	lncRNA	1.37972	0.86089	0.91208	0.97498	0.11283	0.07691
MERGE.29793.9	1.0085	0.049888	0.730234	up	19:-:23050352-23058165	MERGE.29793	19:-:22978016-23075924	-	-	-	-	-	-	3.2888	1.83525	1.34537	0.78792	1.1137	1.38846
NONMMUT027253.2	-1.12862835305035	0.049374	0.730234	down	16:-:74324321-74325814	MERGE.23902	16:-:74324321-74325814	16:-:74324321-74325814	NONMMUG016915.2	-	-	-	lncRNA	2.12744	1.2654	0.61446	2.39735	2.52448	3.53272
MERGE.46766.1	-1.11911983594178	0.0230789	0.69206	down	5:-:135496676-135512043	MERGE.46766	5:-:135496676-135512043	-	-	-	-	-	-	2.41997	0.80809	1.14039	3.23702	2.85634	2.81249
MERGE.19488.1	-1.21294640617568	0.00195339	0.281773	down	14:-:98133986-98140424	MERGE.19488	14:-:98133986-98140424	-	-	-	-	-	-	3.87742	2.61037	2.46256	6.25619	7.49276	7.57378
NONMMUT098420.1	-3.90258777159577	0.00836182	0.526569	down	16:+:40149856-40150684	NONMMUG061511.1	16:+:40149856-40150684	16:+:40149856-40150684	NONMMUG061511.1	-	-	-	lncRNA	0	0.02621	0.14381	0.70147	0.43171	0.49235
MERGE.456.1	-1.18254966000356	0.0349812	0.730234	down	1:-:33612788-33613311	MERGE.456	1:-:33612788-33613311	-	-	-	-	-	-	0.53854	0.78792	0.72807	2.11866	1.36598	1.55785
ENSMUST00000226420	-6.44245996456681	0.045759	0.730234	down	4:-:43492783-43493063	MERGE.40525	4:-:43492783-43495090	4:-:43492783-43493063	ENSMUSG00000115420	-	-	AL732506.1	-	76.1114	0.03867	0.04243	81.2268	50.063	8.76516
NONMMUT058450.2	1.31706	0.00480886	0.415288	up	6:-:113745672-113748181	MERGE.50023	6:-:113743831-114042613	6:-:113745672-113748181	NONMMUG036321.2	-	-	-	lncRNA	2.5385	3.11232	2.18018	1.0531	1.26681	1.04296
NONMMUT025537.2	3.6932	0.0366816	0.730234	up	16:+:13149207-13151995	MERGE.22668	16:+:13109684-13151995	16:+:13149207-13151995	NONMMUG015806.2	-	-	-	lncRNA	0.76152	0.7168	2.72298	0.02843	0.02468	1.07992
NONMMUT144618.1	-4.10978841741688	0.00129893	0.228424	down	16:-:33137945-33138261	NONMMUG091079.1	16:-:33137945-33138261	16:-:33137945-33138261	NONMMUG091079.1	-	-	-	lncRNA	0	0	0.07522	0.58369	0.60791	0.35519
ENSMUST00000156068	-2.85693135068648	0.000216782	0.0845486	down	11:-:71031941-71033513	MERGE.9261	11:-:71031941-71033513	11:-:71031941-71033513	ENSMUSG00000018451	103712	Q8VBZ2	6330403K07Rik	RIKEN cDNA 6330403K07 gene [Source:MGI Symbol;Acc:MGI:1918001]	0.66607	1.25813	0.90174	6.90897	7.5366	7.1879
NONMMUT074758.2	7.88565	0.0121212	0.591405	up	Y:-:1153078-1157029	MERGE.64391	Y:-:1096861-1245759	Y:-:1153078-1157029	NONMMUG046385.2	-	-	-	lncRNA	7.40735	3.62075	4.90521	3.39774	0	0
MERGE.43582.3	2.57654	0.0278123	0.717081	up	5:-:3690147-3802925	MERGE.43582	5:-:3690000-3802925	-	-	-	-	-	-	6.98626	6.83268	7.39525	0.7241	0.41752	6.59127
NONMMUT037328.2	-1.18453534287982	0.0323349	0.730234	down	2:+:54436379-54438740	MERGE.32413	2:+:54436317-55118309	2:+:54436379-54438740	NONMMUG023019.2	-	-	-	lncRNA	0.28925	0.207	0.21704	0.75538	0.35549	0.67929
NONMMUT028759.2	1.00365	0.0449845	0.730234	up	17:+:25833113-25834259	MERGE.25216	17:+:25833113-25834259	17:+:25833113-25834259	NONMMUG017784.2	-	-	-	lncRNA	1.57976	1.57244	1.89174	1.45184	0.76805	0.6258
MERGE.40578.12	8.17808	0.00878675	0.534602	up	4:-:44126220-44233656	MERGE.40578	4:-:44126210-44233789	-	-	-	-	-	-	6.11189	1.37537	3.21619	0.65784	0	0
MERGE.3783.4	6.61502	0.0191813	0.660096	up	1:-:181815356-181842359	MERGE.3783	1:-:181815335-181843046	-	-	-	-	-	-	0.2601	1.6089	0.56801	0.11572	0	0
NONMMUT005366.2	-2.84502141364139	0.0156917	0.633331	down	10:+:40352912-40355737	MERGE.5049	10:+:40350667-40355737	10:+:40352912-40355737	NONMMUG003445.2	-	-	-	lncRNA	0.09986	0.04998	0.70875	1.43107	0.87187	1.35464
NONMMUT046807.2	-2.35342523170097	0.0164722	0.639217	down	4:+:41024780-41025992	MERGE.40334	4:+:40970906-41025993	4:+:41024780-41025992	NONMMUG028942.2	-	-	-	lncRNA	0.57548	0.36724	0.46195	1.35106	6.49094	1.81006
MERGE.34606.2	1.75189	0.0106041	0.572356	up	2:-:143947395-144010628	MERGE.34606	2:-:143947395-144011263	-	-	-	-	-	-	1.42656	1.89446	1.5385	0.3067	1.07798	0.3955
MERGE.13601.4	1.62053	0.0245838	0.699245	up	12:-:101749937-101818468	MERGE.13601	12:-:101746565-101819055	-	-	-	-	-	-	8.22712	2.74805	4.81471	1.23213	3.42971	1.11206
NONMMUT136509.1	2.90867	0.0073875	0.498976	up	X:+:151653426-151654199	MERGE.64096	X:+:151653426-151654199	X:+:151653426-151654199	NONMMUG086197.1	-	-	-	lncRNA	1.17053	0.68784	0.61613	0.10245	0.24898	0.03637
NONMMUT006470.2	1.21969	0.0383601	0.730234	up	10:-:81261255-81264317	MERGE.6128	10:-:81261255-81264317	10:-:81261255-81264317	NONMMUG004165.2	-	-	-	lncRNA	1.54681	0.90808	0.81349	0.82845	0.26514	0.49625
MERGE.50634.2	2.26548	0.047584	0.730234	up	6:-:129460964-129482984	MERGE.50634	6:-:129460150-129482984	-	-	-	-	-	-	1.63488	2.85543	0.37997	0.13932	0.30371	0.45546
NONMMUT034401.2	-1.08653379614143	0.0185607	0.656761	down	19:+:29932777-29936101	MERGE.30031	19:+:29932777-29936101	19:+:29932777-29936101	NONMMUG021155.2	-	-	-	lncRNA	2.09495	1.22864	0.96811	3.82381	2.41351	3.16196
NONMMUT139652.1	-1.26942668873027	0.0466674	0.730234	down	10:+:94403155-94404450	MERGE.6521	10:+:94403155-94404450	10:+:94403155-94404450	NONMMUG088218.1	-	-	-	lncRNA	0.56046	0.23062	0.33742	1.05981	0.81161	0.76347
MERGE.59013.10	-1.30756895068917	0.00327174	0.353588	down	8:+:121968911-121974029	MERGE.59013	8:+:121949750-122029258	-	-	-	-	-	-	1.56096	1.10581	1.08065	3.97086	3.40156	2.54048
MERGE.59788.1	4.95353	0.0422655	0.730234	up	9:-:44403698-44407513	MERGE.59788	9:-:44403698-44407600	-	-	-	-	-	-	0	0.99124	0.76279	0	0	0
NONMMUT058844.2	3.4993	0.0159291	0.635735	up	6:-:125186359-125186683	MERGE.50469	6:-:125168007-125191701	6:-:125186359-125186683	NONMMUG036590.2	-	-	-	lncRNA	65.4872	96.6483	69.3685	51.483	2.88004	2.12198
NONMMUT021959.2	-1.31944039917439	0.00418232	0.39353	down	14:-:98084712-98086732	MERGE.19480	14:-:98084712-98086732	14:-:98084712-98086732	NONMMUG013637.2	-	-	-	lncRNA	1.87399	1.0107	1.16213	3.83217	2.76524	4.01826
NONMMUT041933.2	3.82679	0.0483939	0.730234	up	2:+:181551141-181552880	MERGE.35996	2:+:181520485-181555436	2:+:181551141-181552880	NONMMUG025959.2	-	-	-	lncRNA	25.4794	7.6617	30.7098	7.32978	0.0712	4.28701
NONMMUT123115.1	2.70511	0.029082	0.724944	up	6:+:133139061-133141318	NONMMUG077219.1	6:+:133139061-133141318	6:+:133139061-133141318	NONMMUG077219.1	-	-	-	lncRNA	0.92745	0.3657	0.4488	0.01171	0.18288	0.21816
NONMMUT013279.2	-1.32886248999154	0.0155555	0.632225	down	12:+:4652816-4655049	MERGE.11462	12:+:4592638-4713962	12:+:4652816-4655049	NONMMUG008427.2	-	-	-	lncRNA	1.69531	0.74897	2.35881	3.85725	4.005	3.88084
MERGE.60426.1	-1.04558064729666	0.0178252	0.65067	down	9:-:64208842-64209671	MERGE.60426	9:-:64208842-64209671	-	-	-	-	-	-	1.98627	1.3614	1.33585	3.34391	2.68664	4.39187
NONMMUT012213.2	1.28115	0.0365428	0.730234	up	11:-:103114468-103115723	MERGE.10612	11:-:103114468-103115723	11:-:103114468-103115723	NONMMUG007729.2	-	-	-	lncRNA	0.81593	0.40657	0.59801	0.16836	0.23015	0.38099
MERGE.24917.1	2.06293	0.00237569	0.305695	up	17:+:20969056-20970208	MERGE.24917	17:+:20969056-20970208	-	-	-	-	-	-	2.75663	1.13079	1.50966	0.43558	0.52529	0.31737
NONMMUT095735.1	-4.37881565710575	0.0400476	0.730234	down	15:+:39962649-39966006	MERGE.20646	15:+:39962477-39967515	15:+:39962649-39966006	NONMMUG014402.2	-	-	-	lncRNA	0.94098	0	0	0.85997	0.58925	2.48229
MERGE.21773.1	-2.69107592316918	0.0379197	0.730234	down	15:+:83197518-83197799	MERGE.21773	15:+:83197518-83197799	-	-	-	-	-	-	0.10534	0.07706	0	0.2812	0.97623	0.29945
MERGE.25500.1	-1.20898491028342	0.0101557	0.565302	down	17:-:32321265-32350581	MERGE.25500	17:-:32321265-32350581	-	-	-	-	-	-	1.51496	1.67154	1.80151	4.9189	2.84291	4.90303
MERGE.24543.7	-1.2465240889848	0.0469998	0.730234	down	17:-:6440478-6639971	MERGE.24543	17:-:6438524-6640015	-	-	-	-	-	-	1.044	1.37973	1.27602	4.60299	1.56881	4.15268
MERGE.24543.1	7.89564	0.0136761	0.613328	up	17:-:6438524-6451277	MERGE.24543	17:-:6438524-6640015	-	-	-	-	-	-	8.76159	7.40169	7.41981	0	7.76095	0
MERGE.62278.22	8.15085	0.00418978	0.39353	up	JH584304.1:-:53171-61903	MERGE.62278	JH584304.1:-:20051-61956	-	-	-	-	-	-	3.91318	4.29124	2.75447	0.78481	0	0
MERGE.43469.1	-1.45083598934669	0.0429606	0.730234	down	4:-:155259839-155289758	MERGE.43469	4:-:155259839-155361415	-	-	-	-	-	-	0.99792	0.69296	0.66483	3.48441	0.95303	3.42498
MERGE.22367.3	8.50868	0.000621127	0.16018	up	15:-:102177313-102203893	MERGE.22367	15:-:102176999-102205490	-	-	-	-	-	-	2.53863	1.49334	0.27836	0	0	0
MERGE.16862.3	-6.29272360370354	0.0377301	0.730234	down	13:-:111426158-111489856	MERGE.16862	13:-:111425680-111549947	-	-	-	-	-	-	0	1.72705	0	4.9223	1.66489	1.00465
NONMMUT053218.2	-1.10718328100359	0.0154455	0.631212	down	5:-:97999384-98000950	MERGE.45466	5:-:97999384-98000950	5:-:97999384-98000950	NONMMUG033057.2	-	-	-	lncRNA	1.42173	0.59629	1.18689	2.45435	2.35417	2.10172
NONMMUT040063.2	-2.15858653974906	0.0195177	0.662161	down	2:+:135116133-135119198	MERGE.34439	2:+:135114410-135119198	2:+:135116133-135119198	NONMMUG024800.2	-	-	-	lncRNA	1.39997	0.19136	0.17109	1.37078	1.85417	1.79028
NONMMUT086419.1	-2.40634654940458	0.0137184	0.613328	down	12:+:18064794-18065651	MERGE.11699	12:+:17900734-18065651	12:+:18064794-18065651	NONMMUG008593.2	-	-	-	lncRNA	0.1731	0.07598	0.11116	0.93963	0.35295	0.78738
MERGE.64213.1	-1.44497891012092	0.0144391	0.623474	down	X:+:159692053-159694452	MERGE.64213	X:+:159692053-159694452	-	-	-	-	-	-	1.27482	0.39838	0.47689	1.54191	1.59443	2.40437
MERGE.18661.24	1.48522	0.0372375	0.730234	up	14:-:55636060-55643804	MERGE.18661	14:-:55625400-55643806	-	-	-	-	-	-	5.42968	2.90784	2.56607	2.69548	0.60474	1.3785
MERGE.36162.4	2.76875	0.0243438	0.698557	up	3:-:14606293-14611110	MERGE.36162	3:-:14606284-14611285	-	-	-	-	-	-	0.88231	1.73912	0.61972	0.11995	0.05679	0.47611
NONMMUT107185.1	-1.10685546045134	0.028256	0.720271	down	2:+:67599749-67600391	MERGE.32670	2:+:67599749-67600391	2:+:67599749-67600391	NONMMUG066995.1	-	-	-	lncRNA	0.92394	0.55761	0.46354	1.33603	1.34866	1.5322
NONMMUT055423.2	1.36413	0.0412113	0.730234	up	5:+:149441861-149443581	NONMMUG034413.2	5:+:149441861-149443581	5:+:149441861-149443581	NONMMUG034413.2	-	-	-	lncRNA	0.62999	0.46086	0.49185	0.27646	0.09598	0.34348
NONMMUT077740.1	-4.76258041057099	0.0299098	0.730201	down	1:-:45730015-45731129	MERGE.738	1:-:45730015-45731129	1:-:45730015-45731129	NONMMUG048241.1	-	-	-	lncRNA	0	0.03898	0	0.04741	0.70368	0.87097
MERGE.35368.1	1.2525	0.0292893	0.726531	up	2:+:164551462-164552317	MERGE.35368	2:+:164551462-164552317	-	-	-	-	-	-	2.63732	2.19585	1.55991	1.11166	0.54674	1.29892
NONMMUT017156.2	2.78565	0.0419558	0.730234	up	13:+:41274621-41276567	MERGE.15083	13:+:41249844-41276577	13:+:41274621-41276567	NONMMUG010779.2	-	-	-	lncRNA	1.02219	0.46875	1.34101	0.27831	0.45247	0.01446
NONMMUT086263.1	-1.10516258356359	0.0112622	0.579911	down	12:+:11161859-11165104	NONMMUG053688.1	12:+:11161859-11167502	12:+:11161859-11165104	NONMMUG053688.1	-	-	-	lncRNA	0.32944	0.1841	0.24241	0.57409	0.50887	0.59835
MERGE.46107.1	2.08924	0.00270835	0.32683	up	5:-:115141436-115142161	MERGE.46107	5:-:115141436-115142161	-	-	-	-	-	-	4.00971	1.67614	2.10198	0.61895	0.7584	0.4265
MERGE.47231.13	2.26843	0.00257728	0.317644	up	5:+:145231757-145279832	MERGE.47231	5:+:145231715-145295008	-	-	-	-	-	-	0.74194	0.28501	0.48271	0.1025	0.06594	0.16373
NONMMUT136120.1	1.33865	0.0188559	0.657955	up	X:+:75552211-75553322	NONMMUG085887.1	X:+:75552211-75553322	X:+:75552211-75553322	NONMMUG085887.1	-	-	-	lncRNA	0.69453	0.54716	0.55751	0.19016	0.32184	0.22782
MERGE.4357.1	-1.1007968917207	0.0170004	0.644597	down	10:-:9820339-9821451	MERGE.4357	10:-:9820339-9821451	-	-	-	-	-	-	1.61467	0.85905	0.81409	2.04243	2.32507	2.87051
MERGE.8757.5	7.63843	0.00038248	0.120426	up	11:-:59791790-59809924	MERGE.8757	11:-:59791408-59810016	-	-	-	-	-	-	0.67404	1.34571	0.57488	0.01666	0	0
NONMMUT072205.2	-1.17409001575502	0.028072	0.719077	down	X:+:41534734-41537110	MERGE.62728	X:+:41534734-41537110	X:+:41534734-41537110	NONMMUG044754.2	-	-	-	lncRNA	1.32465	0.47537	1.23384	1.74588	2.39163	2.68224
NONMMUT070174.2	-3.81953937050346	0.0347163	0.730234	down	9:-:79801184-79804263	MERGE.60906	9:-:79801184-80012851	9:-:79801184-79804263	NONMMUG043440.2	-	-	-	lncRNA	0.07715	0.01058	1.60639	1.79795	1.55525	1.6085
NONMMUT039321.2	1.49308	0.00478833	0.415288	up	2:+:119040548-119042195	MERGE.33866	2:+:119040548-119042195	2:+:119040548-119042195	NONMMUG024299.2	-	-	-	lncRNA	3.08221	1.78007	1.96773	0.91424	0.59303	1.10169
NONMMUT152799.1	1.12497	0.00634878	0.46788	up	8:-:84065236-84067287	MERGE.57064	8:-:84065236-84067287	8:-:84065236-84067287	NONMMUG095837.1	-	-	-	lncRNA	2.70699	2.36809	2.54691	1.3438	1.0199	1.44625
NONMMUT109257.1	1.05007	0.0358097	0.730234	up	2:-:75649177-75658998	MERGE.32991	2:-:75649177-75658998	2:-:75649177-75658998	NONMMUG023477.2	-	-	-	lncRNA	0.93319	0.43592	0.61371	0.31015	0.3126	0.30897
MERGE.55471.4	-1.5803322599607	0.0455303	0.730234	down	8:-:25154552-25242737	MERGE.55471	8:-:25154552-25256704	-	-	-	-	-	-	2.49576	5.26487	0.87493	5.33631	6.44711	9.97341
NONMMUT084866.1	2.98353	0.0140482	0.616561	up	11:-:18828746-18829542	MERGE.7711	11:-:18828746-18829542	11:-:18828746-18829542	NONMMUG052862.1	-	-	-	lncRNA	2.06851	0.43624	1.07703	0.06633	0.13817	0.17659
NONMMUT039773.2	1.79688	0.00613242	0.459709	up	2:+:128998922-129001325	MERGE.34224	2:+:128998922-129001325	2:+:128998922-129001325	NONMMUG024610.2	-	-	-	lncRNA	1.87198	0.75476	2.05811	0.38484	0.47524	0.46251
NONMMUT104706.1	1.18092	0.0214142	0.678418	up	18:-:62125289-62127795	MERGE.28513	18:-:62125289-62127795	18:-:62125289-62127795	NONMMUG065506.1	-	-	-	lncRNA	2.8421	2.17971	2.2446	0.9382	1.06211	1.30318
MERGE.16862.6	-6.24459231249675	0.0332468	0.730234	down	13:-:111426158-111489856	MERGE.16862	13:-:111425680-111549947	-	-	-	-	-	-	0	2.61591	0	3.13922	3.02863	1.23595
NONMMUT118450.1	1.20766	0.0411609	0.730234	up	5:+:53914371-53915309	NONMMUG074341.1	5:+:53914371-53915309	5:+:53914371-53915309	NONMMUG074341.1	-	-	-	lncRNA	2.10368	1.27279	1.5109	0.54892	0.51307	1.40893
NONMMUT012558.2	-1.63760228566775	0.0212958	0.677528	down	11:+:110422366-110424271	MERGE.10926	11:+:110422366-110424271	11:+:110422366-110424271	NONMMUG007977.2	-	-	-	lncRNA	0.38962	0.18241	0.10008	0.76969	0.44776	0.68673
MERGE.24175.1	-4.10431344993704	0.0168756	0.64398	down	16:-:90674644-90675006	MERGE.24175	16:-:90674644-90675006	-	-	-	-	-	-	0.12275	0.17959	0	0.65536	2.65439	1.78353
NONMMUT047945.2	-1.50104766171156	0.0120667	0.590896	down	4:-:84672169-84675073	MERGE.41205	4:-:84275095-84675275	4:-:84672169-84675073	NONMMUG029729.2	-	-	-	lncRNA	0.77712	0.26929	0.22982	0.9918	1.12773	1.12885
NONMMUT148032.1	-1.53791856923137	0.0459827	0.730234	down	4:+:46576350-46581773	MERGE.40667	4:+:46576171-46585284	4:+:46576350-46581773	NONMMUG093106.1	-	-	-	lncRNA	0.72346	2.21036	3.45025	6.24844	5.67949	5.36357
MERGE.885.11	-1.39835213299023	0.0038763	0.380253	down	1:-:54651669-54886374	MERGE.885	1:-:54645340-54926387	-	-	-	-	-	-	2.47988	1.14996	2.04227	4.17433	4.67837	6.12078
NONMMUT100070.1	4.10723	0.0409203	0.730234	up	16:-:74806763-74807790	NONMMUG016922.2	16:-:74806763-74810009	16:-:74806763-74807790	NONMMUG016922.2	-	-	-	lncRNA	0.968	0.19024	0.51029	0	0	0.41073
NONMMUT045116.2	1.34427	0.0458514	0.730234	up	3:-:123506878-123508749	MERGE.38997	3:-:123506878-123508749	3:-:123506878-123508749	NONMMUG027834.3	-	-	-	lncRNA	0.53659	0.41475	0.71517	0.22523	0.41285	0.11513
MERGE.61983.1	-1.07619909834864	0.0219187	0.683332	down	9:+:118987545-118990774	MERGE.61983	9:+:118987545-118990774	-	-	-	-	-	-	8.61968	3.07413	5.34412	9.58434	12.632	12.8812
MERGE.1627.1	1.36028	0.0206653	0.673007	up	1:-:86342282-86343792	MERGE.1627	1:-:86342282-86343792	-	-	-	-	-	-	1.9364	0.77659	2.14614	0.64726	0.61947	0.55888
[truncated: 228 more rows]

## Sheet: MNC VS BPD
ID	logFC	Pvalue	adj.Pvalue	regulation	pos_info	track_gene	gene_pos	ref_pos_info	ensembl	entrez	uniprot	symbol	description	H|T_BPDN1	H|T_BPDN2	H|T_BPDN3	F|T_BPD1	F|T_BPD2	F|T_BPD3
MERGE.23967.1	1.22043	0.0120916	0.422613	up	16:-:78337967-78340751	MERGE.23967	16:-:78337967-78340751	-	-	-	-	-	-	1.00186	0.88761	0.87717	3.56242	1.33813	2.05908
MERGE.34130.5	-4.89342226577786	0.00458816	0.280168	down	2:-:126628915-126675486	MERGE.34130	2:-:126627442-126676337	-	-	-	-	-	-	0.78045	0.88359	0.26778	0.00247	0.01987	0.05946
NONMMUT058857.2	-3.79601037981058	0.00581612	0.311628	down	6:+:125244227-125245964	MERGE.50473	6:+:125215551-125245964	6:+:125244227-125245964	NONMMUG036594.2	-	-	-	lncRNA	3.38579	4.02992	4.29399	0.10255	0.11253	1.60517
NONMMUT093903.1	1.41156	0.0324615	0.570391	up	14:-:16901129-16902302	MERGE.17332	14:-:16901129-16902302	14:-:16901129-16902302	NONMMUG058589.1	-	-	-	lncRNA	0.1239	0.32754	0.25153	0.5946	0.49975	0.77179
NONMMUT073415.2	-1.01034995851771	0.0160645	0.459748	down	X:-:102543366-102544938	MERGE.63453	X:-:102509064-102644246	X:-:102543366-102544938	NONMMUG045541.2	-	-	-	lncRNA	2.50517	2.75016	2.04795	1.85063	0.81505	1.18236
NONMMUT077816.1	5.87866	0.00784444	0.358002	up	1:-:54384214-54386501	MERGE.865	1:-:54384214-54386501	1:-:54384214-54386501	NONMMUG048297.1	-	-	-	lncRNA	0	0	0.31679	1.23985	0.58409	0.76598
NONMMUT088051.1	-1.80689386791677	0.0422515	0.604758	down	12:-:24219879-24220618	NONMMUG054842.1	12:-:24219879-24220618	12:-:24219879-24220618	NONMMUG054842.1	-	-	-	lncRNA	0.48248	1.28054	1.01576	0.64226	0.10278	0.27389
NONMMUT032981.2	1.45443	0.0347767	0.57904	up	18:+:73574555-73578331	MERGE.28733	18:+:73574555-73578331	18:+:73574555-73578331	NONMMUG020300.2	-	-	-	lncRNA	0.3116	0.21089	0.27364	1.76953	0.46026	0.5082
NONMMUT065842.2	-1.9436690972215	0.0231296	0.51943	down	8:+:66387657-66388386	MERGE.56424	8:+:66387657-66388386	8:+:66387657-66388386	NONMMUG040736.2	-	-	-	lncRNA	0.67024	0.5832	0.68032	0.59002	0.0893	0.11432
NONMMUT009099.2	-3.66617165438841	0.000397616	0.083465	down	11:+:30268324-30269403	MERGE.8044	11:+:30268289-30269403	11:+:30268324-30269403	NONMMUG005645.2	-	-	-	lncRNA	1.60397	1.88197	1.11855	0.11002	0.13078	0.09935
NONMMUT071612.2	-3.23474850992922	0.00349502	0.245275	down	10:-:7440364-7442749	MERGE.4189	10:-:7440362-7473638	10:-:7440364-7442749	NONMMUG044362.2	-	-	-	lncRNA	2.76554	3.39016	2.62151	0.59758	0.59197	0.08494
NONMMUT004344.2	3.36091	0.0189851	0.485856	up	1:-:191039896-191044514	MERGE.3996	1:-:191029472-191044514	1:-:191039896-191044514	NONMMUG002808.2	-	-	-	lncRNA	0.09339	0.17458	0	0.88107	0.47573	0.4715
MERGE.27369.2	-1.94957936260349	0.0351405	0.579716	down	18:-:13687013-13972733	MERGE.27369	18:-:13687013-13972733	-	-	-	-	-	-	4.24557	5.86548	6.87054	2.50333	0.3627	3.02785
NONMMUT018563.2	-1.02862107382878	0.0110594	0.410339	down	13:+:88887760-88890716	MERGE.16320	13:+:88884078-88890716	13:+:88887760-88890716	NONMMUG011533.2	-	-	-	lncRNA	1.05986	1.11	0.97594	0.68812	0.51073	0.39915
NONMMUT014842.2	1.78934	0.0246317	0.528856	up	12:-:80637904-80640086	MERGE.12990	12:-:80634022-80644341	12:-:80637904-80640086	NONMMUG009411.2	-	-	-	lncRNA	0.50883	0.10695	0.41811	1.64647	0.86104	0.78644
MERGE.2808.39	-6.83762340167202	0.000253334	0.0660416	down	1:-:139878133-140136373	MERGE.2808	1:-:139602427-140183764	-	-	-	-	-	-	0.18265	1.06225	0.32629	0	0	0
NONMMUT054273.2	1.14243	0.0180331	0.478534	up	5:-:121181737-121184996	MERGE.46267	5:-:121181737-121184996	5:-:121181737-121184996	NONMMUG033660.2	-	-	-	lncRNA	0.55572	0.4971	0.72465	2.16406	0.85987	1.18856
NONMMUT126485.1	-1.06023718857427	0.0357771	0.582868	down	7:-:16033015-16033619	MERGE.51349	7:-:16033015-16033619	7:-:16033015-16033619	NONMMUG079354.1	-	-	-	lncRNA	5.63916	4.72154	4.54815	4.90985	1.52649	1.9509
MERGE.50824.11	-2.4207928206446	0.0411681	0.602639	down	6:+:141294183-141326624	MERGE.50824	6:+:141223313-141508905	-	-	-	-	-	-	2.43128	3.37535	2.97839	2.24574	0.60686	0.10789
MERGE.20110.1	-5.81941884923432	3.12412e-05	0.0186728	down	15:+:19525110-19525314	MERGE.20110	15:+:19525110-19525314	-	-	-	-	-	-	1.2256	1.6078	2.48809	0	0	0
NONMMUT058766.2	-1.47708709247421	0.00246773	0.207476	down	6:-:124316953-124319263	NONMMUG036531.2	6:-:124316953-124321576	6:-:124316953-124319263	NONMMUG036531.2	-	-	-	lncRNA	0.97361	0.86022	1.08413	0.41619	0.32237	0.34718
NONMMUT058481.2	-1.20352734652828	0.0233257	0.520967	down	6:+:115189692-115192108	MERGE.50069	6:+:115189692-115192108	6:+:115189692-115192108	NONMMUG036346.2	-	-	-	lncRNA	0.59088	0.32955	0.63309	0.25809	0.20678	0.21704
NONMMUT094551.1	-1.4885461966883	0.00780718	0.357067	down	14:-:68436180-68439462	MERGE.19087	14:-:68436180-68461648	14:-:68436180-68439462	NONMMUG013281.2	-	-	-	lncRNA	1.36143	1.5896	1.25517	0.80075	0.54275	0.29052
NONMMUT091616.1	-1.07378122876125	0.00698934	0.341738	down	13:-:62743915-62746463	MERGE.15732	13:-:62743915-62746463	13:-:62743915-62746463	NONMMUG057069.1	-	-	-	lncRNA	1.02199	0.86204	0.90572	0.49527	0.39641	0.46304
NONMMUT071862.2	1.60526	0.0283193	0.549232	up	X:-:12645470-12647899	MERGE.62478	X:-:12645470-12647899	X:-:12645470-12647899	NONMMUG044526.2	-	-	-	lncRNA	0.28297	0.08477	0.24304	1.06961	0.43818	0.44647
MERGE.7202.5	5.48353	0.0138219	0.438881	up	10:-:127095752-127121125	MERGE.7202	10:-:127094479-127121131	-	-	-	-	-	-	0.23648	0	0	0.35776	0.63842	0.51344
NONMMUT021461.2	4.01435	0.0491054	0.604758	up	14:+:70207602-70209164	MERGE.19140	14:+:70205324-70255287	14:+:70207602-70209164	NONMMUG013326.2	-	-	-	lncRNA	0.76322	0	0	0.87586	0.28628	0.95736
MERGE.56540.1	1.02394	0.0295446	0.55655	up	8:-:69891610-69893212	MERGE.56540	8:-:69891610-69893212	-	-	-	-	-	-	0.6022	0.53117	0.30144	1.27861	0.82013	0.89249
NONMMUT093267.1	-1.88947696474892	0.0403307	0.599947	down	14:+:75350110-75350717	MERGE.19261	14:+:75350110-75350717	14:+:75350110-75350717	NONMMUG058149.1	-	-	-	lncRNA	0.65248	0.42917	0.77268	0.19542	0.05361	0.39218
NONMMUT114384.1	-1.37684304072488	0.0494829	0.604758	down	3:-:149234864-149235932	MERGE.39551	3:-:149234864-149235932	3:-:149234864-149235932	NONMMUG071739.1	-	-	-	lncRNA	1.29886	0.78366	0.72826	0.30566	0.20327	0.75838
NONMMUT005624.2	-1.15916651079288	0.00666646	0.332939	down	10:-:53633149-53634306	MERGE.5362	10:-:53633145-53751123	10:-:53633149-53634306	NONMMUG003642.2	-	-	-	lncRNA	4.17948	4.32872	3.75554	2.52668	1.80145	1.3487
NONMMUT070963.2	1.05212	0.0336568	0.573738	up	9:+:108328055-108329499	MERGE.61640	9:+:108328055-108329499	9:+:108328055-108329499	NONMMUG043950.2	-	-	-	lncRNA	1.99498	1.33056	1.67202	6.15676	2.24819	2.88772
NONMMUT039658.2	1.22218	0.0149445	0.450262	up	2:-:126695074-126845111	MERGE.34143	2:-:126695074-127146282	2:-:126695074-126845111	NONMMUG024536.2	-	-	-	lncRNA	0.57399	0.39993	0.3835	1.72189	0.74025	1.01535
NONMMUT056197.2	-1.07668375643551	0.0166243	0.465358	down	6:+:31292534-31293666	MERGE.48058	6:+:31219939-31516811	6:+:31292534-31293666	NONMMUG034895.3	-	-	-	lncRNA	2.55602	2.03636	1.59934	1.40264	0.70004	0.99965
NONMMUT022776.2	1.15138	0.027422	0.543844	up	15:-:11985293-11987767	MERGE.20070	15:-:11981339-11996983	15:-:11985293-11987767	NONMMUG014077.2	-	-	-	lncRNA	0.60909	0.53824	0.58029	2.46038	1.00529	0.90078
NONMMUT047270.2	-2.05026968019906	0.000211039	0.0604195	down	4:+:52479614-52483091	MERGE.40744	4:+:52439243-52488260	4:+:52479614-52483091	NONMMUG029249.2	-	-	-	lncRNA	2.15577	2.56266	2.31943	0.81991	0.47484	0.46276
NONMMUT139941.1	-1.89919462038904	0.00280415	0.219929	down	10:-:44851393-44866786	NONMMUG051012.2	10:-:44819087-44866786	10:-:44851393-44866786	NONMMUG051012.2	-	-	-	lncRNA	0.4261	0.55192	0.64148	0.1183	0.14948	0.17266
NONMMUT141299.1	-1.32852803490638	0.00385908	0.260799	down	12:+:21045768-21049032	MERGE.11811	12:+:20990459-21270171	12:+:21045768-21049032	NONMMUG008611.3	-	-	-	lncRNA	1.25553	1.01791	1.05654	0.50948	0.47919	0.35785
NONMMUT144286.1	1.02453	0.0403199	0.599947	up	16:+:20563842-20566227	MERGE.22975	16:+:20563842-20566227	16:+:20563842-20566227	NONMMUG090860.1	-	-	-	lncRNA	0.71494	0.59285	0.29815	1.46904	0.81966	0.95437
MERGE.64264.1	-1.02857941200569	0.0198735	0.492764	down	X:-:162023588-162025667	MERGE.64264	X:-:162023588-162025667	-	-	-	-	-	-	2.0789	1.66384	1.80689	1.57092	0.65817	0.74513
NONMMUT018410.2	-2.89685355814577	0.0449411	0.604758	down	13:+:78112482-78114770	MERGE.16193	13:+:78112482-78116319	13:+:78112482-78114770	NONMMUG011461.2	-	-	-	lncRNA	1.9353	0.21599	1.81782	0.17519	0.09493	0.13021
MERGE.61014.1	-1.83591249318327	0.00258563	0.210427	down	9:+:88556320-88559204	MERGE.61014	9:+:88556320-88559204	-	-	-	-	-	-	7.20996	6.59771	5.74589	3.38231	1.54031	1.09923
MERGE.52044.1	-2.66825497806953	0.000228217	0.0634578	down	7:-:34742473-34743857	MERGE.52044	7:-:34742473-34743857	-	-	-	-	-	-	2.17688	2.26079	1.72507	0.32171	0.25103	0.4304
MERGE.63730.1	-1.21286194515387	0.00842829	0.366619	down	X:-:124281035-124282625	MERGE.63730	X:-:124281035-124282625	-	-	-	-	-	-	0.87271	1.1912	1.29923	0.53211	0.45072	0.49457
NONMMUT123109.1	1.57383	0.0223595	0.513087	up	6:+:133114953-133115763	MERGE.50654	6:+:133114953-133115763	6:+:133114953-133115763	NONMMUG077213.1	-	-	-	lncRNA	0.21197	0.28787	0.33101	1.59328	0.71004	0.63212
MERGE.36226.7	-2.57870271473537	0.00445435	0.27612	down	3:-:19223115-19311052	MERGE.36226	3:-:19199539-19311871	-	-	-	-	-	-	2.87334	5.11012	3.37834	0.37775	1.40884	0.41715
NONMMUT038467.2	1.02491	0.0106564	0.402945	up	2:+:91281292-91283779	MERGE.33275	2:+:91281292-91283779	2:+:91281292-91283779	NONMMUG023774.2	-	-	-	lncRNA	0.82913	0.67342	0.82003	2.0595	1.12668	1.7059
MERGE.27218.4	6.75502	0.00904966	0.376028	up	18:-:6439592-6516061	MERGE.27218	18:-:6435951-6516108	-	-	-	-	-	-	0	0	1.10484	2.367	2.47364	1.90003
NONMMUT021348.2	-3.09506097602961	0.0137104	0.438881	down	14:+:66297925-66300314	MERGE.19047	14:+:66297031-66311424	14:+:66297925-66300314	NONMMUG013251.2	-	-	-	lncRNA	1.94204	1.7928	4.30197	0.15536	0.11365	1.29697
NONMMUT007198.2	-1.12763570761842	0.00844846	0.366892	down	10:-:105514681-105516649	MERGE.6670	10:-:105514681-105516649	10:-:105514681-105516649	NONMMUG004595.2	-	-	-	lncRNA	1.26259	2.00176	1.76559	0.96551	0.62906	0.72659
NONMMUT059306.2	-1.95090897850876	0.0472727	0.604758	down	6:+:140651622-140653935	MERGE.50810	6:+:140622663-140678472	6:+:140651622-140653935	NONMMUG036851.2	-	-	-	lncRNA	5.57174	6.08325	4.62308	4.94862	1.42269	0.38641
NONMMUT083447.1	-2.92825817092173	0.0225362	0.514557	down	11:+:31109323-31110396	NONMMUG051962.1	11:+:31109079-31110396	11:+:31109323-31110396	NONMMUG051962.1	-	-	-	lncRNA	1.34206	0.26853	0.71237	0.06914	0.07081	0.09991
MERGE.20773.1	-5.1019759630096	0.00106294	0.138169	down	15:-:49322642-49322878	MERGE.20773	15:-:49322642-49322878	-	-	-	-	-	-	1.78547	2.31786	1.35925	0	0	0.20122
MERGE.19539.1	-1.61107772622085	0.00220385	0.195875	down	14:+:99618037-99619366	MERGE.19539	14:+:99618037-99619366	-	-	-	-	-	-	1.78966	2.5195	1.6753	0.65886	0.56367	0.75298
NONMMUT114381.1	-1.36134942041411	0.0235928	0.522134	down	3:-:149229307-149230762	MERGE.39548	3:-:149229307-149230762	3:-:149229307-149230762	NONMMUG071736.1	-	-	-	lncRNA	0.95363	0.93379	0.70985	0.78546	0.24625	0.24565
MERGE.19335.6	1.09291	0.035228	0.579859	up	14:-:78559350-78653785	MERGE.19335	14:-:78557927-78732776	-	-	-	-	-	-	1.82796	2.15176	1.90598	7.16788	3.15096	2.79256
NONMMUT123114.1	1.81283	0.0213834	0.505837	up	6:+:133136033-133138248	NONMMUG077218.1	6:+:133136033-133138248	6:+:133136033-133138248	NONMMUG077218.1	-	-	-	lncRNA	0.11935	0.27888	0.48457	1.68228	0.72564	0.65098
NONMMUT024486.2	5.57972	0.0175408	0.47429	up	15:+:85653513-85696570	MERGE.21814	15:+:85653460-85707524	15:+:85653513-85696570	NONMMUG015145.3	-	-	-	lncRNA	0.01217	0.01264	0.00412	0.67883	0.14664	1.15564
MERGE.42595.4	8.41114	0.00536655	0.298617	up	4:-:133847473-133887653	MERGE.42595	4:-:133847290-133887797	-	-	-	-	-	-	0	1.86689	0	5.41345	5.96944	6.60765
NONMMUT002114.2	-2.88140381469745	0.00105486	0.137678	down	1:-:95583050-95585360	NONMMUG001420.2	1:-:95582143-95585360	1:-:95583050-95585360	NONMMUG001420.2	-	-	-	lncRNA	0.74959	0.68934	0.55177	0.16067	0.10343	0.04643
MERGE.11838.1	1.15219	0.0253162	0.532178	up	12:-:23022418-23023537	MERGE.11838	12:-:23022418-23023537	-	-	-	-	-	-	0.49589	1.05452	0.52732	1.48523	1.50364	1.50091
MERGE.4220.3	7.55191	9.51e-05	0.0374661	up	10:-:7907329-7955893	MERGE.4220	10:-:7905653-7956230	-	-	-	-	-	-	0	0	0.00535	0.45599	0.61083	1.16464
MERGE.53786.3	1.13158	0.024227	0.526293	up	7:-:105610648-105633485	MERGE.53786	7:-:105604463-105633571	-	-	-	-	-	-	2.06065	0.85269	1.17656	2.5893	2.45236	3.3209
MERGE.4750.1	-1.90221269582519	0.0200435	0.494415	down	10:-:22441643-22441960	MERGE.4750	10:-:22441643-22441960	-	-	-	-	-	-	2.57819	2.41845	2.02605	1.96162	0.54667	0.29993
MERGE.47485.2	1.05096	0.0054006	0.299816	up	6:-:5809694-5817752	MERGE.47485	6:-:5808065-5819798	-	-	-	-	-	-	1.09445	1.24399	0.80612	2.5193	1.89689	1.94388
NONMMUT074648.2	-1.23464615240873	0.0246822	0.528999	down	X:+:166170481-166173319	MERGE.64326	X:+:166170454-166190512	X:+:166170481-166173319	NONMMUG046321.2	-	-	-	lncRNA	0.46578	0.59983	0.78484	0.36097	0.30616	0.16798
NONMMUT017038.2	-1.49233816499083	0.0163855	0.461839	down	13:+:37386014-37387163	MERGE.14956	13:+:37380117-37387163	13:+:37386014-37387163	NONMMUG010713.2	-	-	-	lncRNA	0.41396	0.75235	0.65362	0.30996	0.17006	0.20734
NONMMUT151194.1	4.93052	0.00522463	0.296431	up	7:+:101549945-101557691	MERGE.53641	7:+:101549945-101557691	7:+:101549945-101557691	NONMMUG094991.1	-	-	-	lncRNA	0	0.20843	0	0.85156	1.28255	0.74388
NONMMUT106457.1	1.57736	0.0498613	0.604758	up	19:-:59797220-59798340	MERGE.30865	19:-:59797220-59798340	19:-:59797220-59798340	NONMMUG066520.1	-	-	-	lncRNA	0.3303	0.09801	0.14369	0.95394	0.30046	0.62748
NONMMUT106459.1	1.43347	0.0285076	0.550544	up	19:-:59821829-59822555	MERGE.30868	19:-:59821829-59822555	19:-:59821829-59822555	NONMMUG066522.1	-	-	-	lncRNA	0.18189	0.17001	0.22156	0.79675	0.38857	0.60677
NONMMUT144510.1	-1.90726132509774	0.0256358	0.534404	down	16:-:11065486-11065892	MERGE.22636	16:-:11065486-11065892	16:-:11065486-11065892	NONMMUG091018.1	-	-	-	lncRNA	1.10467	1.24848	2.27557	0.62037	0.16017	0.70303
MERGE.4634.1	-1.36275855613507	0.00594157	0.314471	down	10:+:18352200-18355192	MERGE.4634	10:+:18352200-18355192	-	-	-	-	-	-	1.53753	1.31231	1.11668	0.78901	0.31945	0.55767
MERGE.46290.4	1.64579	0.0231804	0.519497	up	5:-:121567878-121575127	MERGE.46290	5:-:121566027-121593824	-	-	-	-	-	-	10.3149	7.83129	10.8981	24.5845	15.6599	65.2853
MERGE.45684.1	-1.73026159328418	0.00585457	0.312365	down	5:-:104949423-104950908	MERGE.45684	5:-:104949423-104950908	-	-	-	-	-	-	2.2425	2.23652	1.57169	1.27934	0.36558	0.52952
NONMMUT058041.2	1.13377	0.0278506	0.546589	up	6:+:93194941-93197851	MERGE.49669	6:+:93194941-93197851	6:+:93194941-93197851	NONMMUG036054.2	-	-	-	lncRNA	1.37187	1.50024	1.06053	4.45926	1.52655	3.24367
NONMMUT013316.2	1.43601	0.00498439	0.291469	up	12:-:5201929-5205107	MERGE.11505	12:-:5201929-5205107	12:-:5201929-5205107	NONMMUG008449.2	-	-	-	lncRNA	0.30366	0.4104	0.36311	1.56979	0.69722	0.87382
MERGE.59386.8	2.21901	0.00283055	0.220492	up	9:-:30911207-30922452	MERGE.59386	9:-:30899155-30922452	-	-	-	-	-	-	0.33019	0.14637	0.50682	1.92664	1.0951	1.27789
NONMMUT000106.2	-1.23650682541508	0.0145604	0.446828	down	1:-:9667415-9668325	MERGE.148	1:-:9667415-9700209	1:-:9667415-9668325	NONMMUG000075.2	-	-	-	lncRNA	1.13221	1.809	1.88594	0.66843	0.66788	0.71978
NONMMUT023755.2	-1.01284833954035	0.0062949	0.323435	down	15:-:64020241-64060428	MERGE.21012	15:-:63929097-64060478	15:-:64020241-64060428	NONMMUG014666.2	-	-	-	lncRNA	2.42315	3.21005	2.69581	1.79546	1.10146	1.26336
MERGE.59069.4	2.57107	0.0200859	0.494577	up	8:-:122625137-122676189	MERGE.59069	8:-:122624574-122699109	-	-	-	-	-	-	0.18061	0.08657	0.1282	0.56884	0.33	2.33774
MERGE.57464.4	-8.60132087410582	0.00281136	0.21998	down	8:-:95449633-95488454	MERGE.57464	8:-:95446096-95490039	-	-	-	-	-	-	4.08281	4.29305	4.011	0	0	0.59176
MERGE.1494.1	-1.20380229819177	0.0227347	0.516946	down	1:-:80742414-80743009	MERGE.1494	1:-:80742414-80743009	-	-	-	-	-	-	4.48182	2.7651	2.83766	2.59167	0.94795	1.36024
MERGE.10603.3	-4.24871788288323	0.0141614	0.442021	down	11:-:102994049-103028304	MERGE.10603	11:-:102994047-103028333	-	-	-	-	-	-	1.79857	1.03301	1.79798	0.00765	0.69411	0.03071
ENSMUST00000099676	-1.24711708706612	0.0280156	0.547977	down	19:-:11047617-11050566	MERGE.29559	19:-:11047461-11055856	19:-:11047617-11050566	ENSMUSG00000075010	107350	Q3U6J0	AW112010	expressed sequence AW112010	9.68586	15.1423	9.95363	4.32067	7.66194	3.18956
MERGE.41262.1	-1.36344944512094	0.0267159	0.540844	down	4:+:85775364-85775895	MERGE.41262	4:+:85775364-85775895	-	-	-	-	-	-	1.49138	2.24586	2.37166	1.61923	0.7148	0.49302
MERGE.39093.1	-6.35208142275354	2.45791e-05	0.0161499	down	3:-:129668840-129669199	MERGE.39093	3:-:129668840-129669199	-	-	-	-	-	-	2.2774	1.14444	1.04398	0	0	0
MERGE.43703.2	-1.17936374286739	0.048	0.604758	down	5:+:9100747-9145190	MERGE.43703	5:+:9100668-9250044	-	-	-	-	-	-	5.0778	5.9033	5.91886	1.10333	3.49872	3.63352
NONMMUT088446.1	-2.33571531402246	0.00305999	0.228678	down	12:-:56488321-56504861	MERGE.12457	12:-:56488321-56536908	12:-:56488321-56504861	NONMMUG009055.3	-	-	-	lncRNA	0.99421	1.2289	0.58817	0.14386	0.24055	0.16497
MERGE.34492.1	-1.08613829324426	0.0144296	0.445556	down	2:+:136959067-136960664	MERGE.34492	2:+:136959067-136960664	-	-	-	-	-	-	2.04395	2.0282	1.38594	1.1339	0.58472	0.96989
MERGE.10702.10	1.15029	0.0280088	0.5479	up	11:-:105935084-105945114	MERGE.10702	11:-:105931597-105953336	-	-	-	-	-	-	1.79614	2.26509	1.4976	6.49466	2.1986	4.62675
MERGE.59946.13	2.02666	0.00435722	0.275001	up	9:-:48756299-48762265	MERGE.59946	9:-:48605201-48836222	-	-	-	-	-	-	2.2066	2.07829	1.80376	15.3258	4.53147	7.55358
MERGE.32555.1	-1.49055020716603	0.0288713	0.551892	down	2:-:62330073-62412231	MERGE.32555	2:-:62330073-62412231	-	-	-	-	-	-	0.50247	1.06732	0.51465	0.34271	0.31182	0.1177
MERGE.32555.6	-1.21364093128484	0.00843565	0.366751	down	2:-:62342383-62345283	MERGE.32555	2:-:62330073-62412231	-	-	-	-	-	-	6.36798	4.79623	3.87246	2.41632	1.88547	2.22409
NONMMUT123056.1	1.7186	0.0126333	0.427891	up	6:+:127807155-127812631	MERGE.50511	6:+:127807155-127820031	6:+:127807155-127812631	NONMMUG036652.2	-	-	-	lncRNA	0.24043	0.2497	0.41103	1.53497	0.59264	1.23214
MERGE.64394.1	11.092	2.82921e-07	0.00268112	up	Y:-:1147432-1150729	MERGE.64394	Y:-:1147432-1150729	-	-	-	-	-	-	0	0	0	5.59325	3.14947	4.26565
MERGE.56630.4	-9.17920774531618	0.000361682	0.0797616	down	8:-:70893821-70897572	MERGE.56630	8:-:70882889-70897572	-	-	-	-	-	-	0.48379	1.32969	4.14185	0	0	0
MERGE.14261.1	1.51704	0.0157245	0.457803	up	13:-:8980867-8981519	MERGE.14261	13:-:8980867-8981519	-	-	-	-	-	-	0.56702	0.79918	0.69888	3.98032	1.41428	1.64317
MERGE.13559.2	-2.22990763557652	0.00798858	0.360009	down	12:-:100300774-100520712	MERGE.13559	12:-:100300770-100520826	-	-	-	-	-	-	3.36083	1.71407	6.52121	0.59734	0.56623	1.03103
NONMMUT031835.2	-4.31447367629807	0.0258417	0.536162	down	18:+:32235481-32236744	MERGE.27672	18:+:32163001-32236751	18:+:32235481-32236744	NONMMUG019577.2	-	-	-	lncRNA	6.15149	8.46381	7.08296	0.0705	5.72475	0.06602
MERGE.26653.1	-1.28905194570348	0.00541041	0.300076	down	17:-:70919114-70920458	MERGE.26653	17:-:70919114-70920458	-	-	-	-	-	-	2.72337	3.06319	2.71446	1.91037	0.78357	1.09914
NONMMUT067029.2	2.19451	0.00771286	0.355209	up	8:-:106849302-106851409	MERGE.57700	8:-:106849302-106851409	8:-:106849302-106851409	NONMMUG041497.2	-	-	-	lncRNA	0.30111	0.25408	0.22923	2.57167	0.58758	1.3008
NONMMUT040372.2	6.67563	2.7306e-05	0.0170822	up	2:-:148376211-148382194	MERGE.34748	2:-:148339349-148382194	2:-:148376211-148382194	NONMMUG025014.2	-	-	-	lncRNA	0	0	0	1.09424	0.32214	0.67484
MERGE.18086.2	-4.49206027347813	0.00403492	0.266121	down	14:-:40993665-41007179	MERGE.18086	14:-:40993417-41013788	-	-	-	-	-	-	4.97954	5.32278	4.77218	2.29069	0.05441	0.12537
MERGE.18086.4	10.8515	3.10275e-06	0.00531515	up	14:-:40993737-41006952	MERGE.18086	14:-:40993417-41013788	-	-	-	-	-	-	0	0	0	4.98106	9.51519	8.12807
MERGE.53122.2	-3.06197333467266	0.000240207	0.0651299	down	7:-:80227159-80232597	MERGE.53122	7:-:80227147-80232813	-	-	-	-	-	-	10.4743	13.1377	12.0358	0.96616	2.0649	1.3382
NONMMUT151516.1	3.38456	0.0406568	0.600347	up	7:-:29251226-29251872	MERGE.51869	7:-:29251226-29251872	7:-:29251226-29251872	NONMMUG095192.1	-	-	-	lncRNA	0.02044	0.0849	0	1.28551	0.13434	0.11056
MERGE.51790.2	4.25822	0.00631822	0.323693	up	7:-:28359605-28372675	MERGE.51790	7:-:28359604-28372730	-	-	-	-	-	-	0.23072	0.01079	0.0211	1.67152	0.56016	0.51909
NONMMUT022541.2	-1.19541940783055	0.0168045	0.467333	down	14:-:122959301-122961768	MERGE.19846	14:-:122959301-122961768	14:-:122959301-122961768	NONMMUG013903.2	-	-	-	lncRNA	0.46615	0.51194	0.57106	0.25877	0.28175	0.1739
NONMMUT004119.2	1.45454	0.00804325	0.360979	up	1:+:182125869-182128499	MERGE.3786	1:+:182124737-182132407	1:+:182125869-182128499	NONMMUG002670.2	-	-	-	lncRNA	0.86448	0.51154	0.53568	2.83385	1.17694	1.52255
MERGE.35304.3	7.5279	0.00169206	0.173857	up	2:-:163405822-163417010	MERGE.35304	2:-:163403793-163424697	-	-	-	-	-	-	0.07751	0	0	0.70686	0.66418	0.84362
MERGE.27533.1	-2.3566439258146	0.029658	0.557576	down	18:-:24533972-24534222	MERGE.27533	18:-:24533972-24534222	-	-	-	-	-	-	0.73757	1.64143	2.0321	0.35503	0.08657	0.47499
NONMMUT031181.2	-1.03794758839382	0.0153777	0.455095	down	17:-:94833058-94834798	MERGE.27075	17:-:94759942-94835181	17:-:94833058-94834798	NONMMUG019192.2	-	-	-	lncRNA	1.26843	1.44354	1.23355	1.03224	0.44933	0.62316
NONMMUT061841.2	5.05475	0.020312	0.49591	up	7:+:63896749-63900239	MERGE.52750	7:+:63896389-63900239	7:+:63896749-63900239	NONMMUG038211.2	-	-	-	lncRNA	0.00601	0	0.25015	0.29029	0.60251	0.66114
NONMMUT003976.2	-3.57550090182965	0.000885316	0.127733	down	1:+:178732707-178733990	MERGE.3646	1:+:178732707-178733990	1:+:178732707-178733990	NONMMUG002566.2	-	-	-	lncRNA	0.54583	0.89844	0.90947	0.05784	0.05077	0.07428
MERGE.16410.1	-1.12339273646891	0.011857	0.420344	down	13:-:92059694-92061795	MERGE.16410	13:-:92059694-92061795	-	-	-	-	-	-	3.57327	3.4366	2.20943	1.90776	0.95108	1.41228
MERGE.18371.1	-1.51443487766627	0.0253584	0.532308	down	14:-:49971355-49971555	MERGE.18371	14:-:49971355-49971555	-	-	-	-	-	-	3.28945	6.8325	5.60944	1.18227	2.16219	2.13531
MERGE.43861.1	-1.14887105915489	0.0197894	0.492326	down	5:-:20843718-20845797	MERGE.43861	5:-:20843718-20845797	-	-	-	-	-	-	1.71653	1.56481	1.68428	1.27815	0.41266	0.84257
NONMMUT150723.1	1.84564	0.0102311	0.396314	up	6:-:133102486-133104672	MERGE.50650	6:-:133102486-133104672	6:-:133102486-133104672	NONMMUG094734.1	-	-	-	lncRNA	0.23581	0.12559	0.21481	1.37861	0.45209	0.6051
MERGE.23022.1	1.15613	0.00403631	0.266121	up	16:-:21951115-21953642	MERGE.23022	16:-:21951115-21953642	-	-	-	-	-	-	0.85263	0.94525	1.06191	2.75543	1.90825	1.79209
MERGE.20536.1	1.32817	0.0323729	0.570016	up	15:-:36071262-36072445	MERGE.20536	15:-:36071262-36072445	-	-	-	-	-	-	1.01634	1.2759	0.37411	2.74717	1.85366	1.66145
MERGE.43687.1	-1.41251477373748	0.0264184	0.539236	down	5:+:8972169-8972421	MERGE.43687	5:+:8972169-8972421	-	-	-	-	-	-	14.9484	26.381	26.3677	5.69436	13.1411	7.06846
MERGE.1889.1	-1.5678106199792	0.000799181	0.123581	down	1:-:95609487-95614513	MERGE.1889	1:-:95609487-95614513	-	-	-	-	-	-	3.49145	3.34015	3.84462	1.55763	0.81022	1.29117
MERGE.11687.1	4.1084	0.0451807	0.604758	up	12:+:17817545-17818002	MERGE.11687	12:+:17817545-17818002	-	-	-	-	-	-	0.05774	0	0.17584	4.66971	0.42701	0.52062
MERGE.52760.1	1.01353	0.0288964	0.551892	up	7:+:64322811-64326002	MERGE.52760	7:+:64322811-64326002	-	-	-	-	-	-	0.75812	0.8906	1.00922	2.83366	1.05518	1.84509
[truncated: 2,833 more rows]
