# Supplementary material for: Integrative Studies of Human Cord Blood Derived Mononuclear Cells and Umbilical Cord Derived Mesenchyme Stem Cells in Ameliorating Bronchopulmonary Dysplasia
Source: Front Cell Dev Biol. 2021 Nov 9;9:679866. doi: 10.3389/fcell.2021.679866 (PMC8631197; doi:10.3389/fcell.2021.679866)
Supplement: Supplementary file 3 [file Table_3.xlsx]

## Sheet: MSC VS BPD
	logFC	P.Value	change
mmu-let-7a-1-3p	0.3022	0.0159938	NOT
mmu-let-7a-2-3p	0.324509	0.357762	NOT
mmu-let-7a-5p	-0.201018	0.0635731	NOT
mmu-let-7b-3p	0.250703	0.0840729	NOT
mmu-let-7b-5p	0.24093	0.0306735	NOT
mmu-let-7c-1-3p	0.206885	0.35345	NOT
mmu-let-7c-2-3p	0.302265	0.0159083	NOT
mmu-let-7c-5p	0.128088	0.253961	NOT
mmu-let-7d-3p	-0.0251579	0.82841	NOT
mmu-let-7d-5p	-0.0685484	0.548202	NOT
mmu-let-7e-3p	0.234783	0.122455	NOT
mmu-let-7e-5p	-0.0772269	0.472946	NOT
mmu-let-7f-1-3p	0.00964621	0.969119	NOT
mmu-let-7f-2-3p	0.224995	0.11455	NOT
mmu-let-7f-5p	-0.245268	0.0215522	NOT
mmu-let-7g-3p	0.037238	1	NOT
mmu-let-7g-5p	-0.0446263	0.683048	NOT
mmu-let-7i-3p	0.099062	0.44552	NOT
mmu-let-7i-5p	0.0585209	0.600301	NOT
mmu-let-7j	-0.148512	0.243775	NOT
mmu-let-7k	-0.274	0.318716	NOT
mmu-miR-100-3p	-0.260268	0.385139	NOT
mmu-miR-100-5p	0.373457	0.00120181	NOT
mmu-miR-101a-3p	-0.0287555	0.802284	NOT
mmu-miR-101a-5p	0.187458	0.75159	NOT
mmu-miR-101b-3p	0.15477	0.179607	NOT
mmu-miR-101b-5p	-3.83139	0.0839823	NOT
mmu-miR-101c	0.0626284	0.643628	NOT
mmu-miR-103-1-5p	-0.472515	1	NOT
mmu-miR-103-2-5p	-0.689024	0.0738915	NOT
mmu-miR-103-3p	-0.0446878	0.694621	NOT
mmu-miR-106a-5p	0.142472	0.462359	NOT
mmu-miR-106b-3p	-0.224441	0.0540032	NOT
mmu-miR-106b-5p	-0.0536227	0.641733	NOT
mmu-miR-107-3p	0.341593	0.010787	NOT
mmu-miR-107-5p	-0.505686	0.788847	NOT
mmu-miR-10a-3p	0.218942	0.081967	NOT
mmu-miR-10a-5p	0.00696038	0.952092	NOT
mmu-miR-10b-3p	-0.00158188	1	NOT
mmu-miR-10b-5p	-0.287999	0.00981192	NOT
mmu-miR-1188-3p	0	1	NOT
mmu-miR-1188-5p	-0.815964	1	NOT
mmu-miR-1190	1.85213	1	NOT
mmu-miR-1191a	0.141834	0.459535	NOT
mmu-miR-1191b-3p	1.85245	1	NOT
mmu-miR-1191b-5p	0.231262	0.453705	NOT
mmu-miR-1193-3p	-0.566613	0.000349276	NOT
mmu-miR-1193-5p	0.160706	1	NOT
mmu-miR-1194	0.456694	0.221748	NOT
mmu-miR-1195	-0.723133	0.46902	NOT
mmu-miR-1197-3p	-0.364399	0.628071	NOT
mmu-miR-1198-3p	-0.465009	0.311384	NOT
mmu-miR-1198-5p	-0.0752823	0.574253	NOT
mmu-miR-1199-3p	0.906028	0.243541	NOT
mmu-miR-1199-5p	0.906079	0.015969	NOT
mmu-miR-12178-3p	2.64974	0.501926	NOT
mmu-miR-12180-3p	0	1	NOT
mmu-miR-12181-3p	0	1	NOT
mmu-miR-12182-3p	-0.423328	0.181978	NOT
mmu-miR-12184-3p	0.147727	1	NOT
mmu-miR-12184-5p	0.167932	1	NOT
mmu-miR-12185-3p	1.85899	1	NOT
mmu-miR-12185-5p	0	1	NOT
mmu-miR-12186-3p	2.64948	0.501529	NOT
mmu-miR-12187-3p	0.320005	0.825398	NOT
mmu-miR-12187-5p	-3.18271	0.278984	NOT
mmu-miR-12189-3p	-1.12636	0.458594	NOT
mmu-miR-12191-3p	-0.198245	0.76969	NOT
mmu-miR-12192-5p	1.85899	1	NOT
mmu-miR-12193-3p	-0.00770569	1	NOT
mmu-miR-12193-5p	-1.87626	1	NOT
mmu-miR-12194-3p	-0.777867	0.0828351	NOT
mmu-miR-12195-3p	1.56842	0.115641	NOT
mmu-miR-12197-3p	1.85899	1	NOT
mmu-miR-12199-3p	0.372798	0.256816	NOT
mmu-miR-122-3p	0.548113	0.259333	NOT
mmu-miR-122-5p	0.347366	0.373462	NOT
mmu-miR-12201-3p	-1.90175	1	NOT
mmu-miR-12201-5p	1.38543	0.0764781	NOT
mmu-miR-12202-3p	-0.655469	0.500493	NOT
mmu-miR-12203-3p	0	1	NOT
mmu-miR-12205-3p	-0.54066	0.55396	NOT
mmu-miR-12205-5p	-1.16334	0.363611	NOT
mmu-miR-12206-5p	-0.0514011	1	NOT
mmu-miR-1224-5p	-0.730277	0.760126	NOT
mmu-miR-1231-3p	-1.4968	0.162911	NOT
mmu-miR-1231-5p	1.12299	0.523383	NOT
mmu-miR-124-3p	0.551973	0.654551	NOT
mmu-miR-124-5p	-1.90174	1	NOT
mmu-miR-1247-3p	0.354337	0.732293	NOT
mmu-miR-1247-5p	0.703951	0.388072	NOT
mmu-miR-1249-3p	-0.118609	0.487796	NOT
mmu-miR-1249-5p	0.00210793	1	NOT
mmu-miR-124b-3p	-0.00920386	1	NOT
mmu-miR-1258-5p	-0.00899388	1	NOT
mmu-miR-125a-3p	0.575177	0.00154181	NOT
mmu-miR-125a-5p	0.0230069	0.843402	NOT
mmu-miR-125b-1-3p	0.365882	0.00772669	NOT
mmu-miR-125b-2-3p	0.0967486	0.420863	NOT
mmu-miR-125b-5p	0.239059	0.0222889	NOT
mmu-miR-1264-3p	0.0560424	0.716948	NOT
mmu-miR-1264-5p	-0.053116	0.80352	NOT
mmu-miR-126a-3p	0.169514	0.117709	NOT
mmu-miR-126a-5p	-0.0965433	0.398161	NOT
mmu-miR-126b-3p	0.020596	1	NOT
mmu-miR-126b-5p	-0.0806579	1	NOT
mmu-miR-127-3p	-0.44182	7.25086e-05	NOT
mmu-miR-127-5p	-0.383275	0.0104252	NOT
mmu-miR-1271-3p	-0.916203	0.703809	NOT
mmu-miR-1271-5p	0	1	NOT
mmu-miR-128-1-5p	-0.501142	0.370859	NOT
mmu-miR-128-2-5p	-1.87074	1	NOT
mmu-miR-128-3p	-0.0156402	0.900139	NOT
mmu-miR-129-1-3p	1.03012	0.0353318	UP
mmu-miR-129-2-3p	0.767273	0.166313	NOT
mmu-miR-129-5p	1.45109	1e-06	UP
mmu-miR-1291	-0.680518	0.0102484	NOT
mmu-miR-1298-3p	0.796966	0.00439246	NOT
mmu-miR-1298-5p	0.641605	1.57478e-06	NOT
mmu-miR-129b-3p	0.476934	1	NOT
mmu-miR-129b-5p	-0.731657	0.749911	NOT
mmu-miR-1306-3p	0.0372948	0.912346	NOT
mmu-miR-1306-5p	-0.384738	0.0290024	NOT
mmu-miR-130a-3p	-0.00817016	0.945183	NOT
mmu-miR-130a-5p	0.15172	0.500645	NOT
mmu-miR-130b-3p	-0.0320252	0.922638	NOT
mmu-miR-130b-5p	-0.0018178	1	NOT
mmu-miR-132-3p	-0.453221	0.000261029	NOT
mmu-miR-132-5p	-0.268364	0.0663592	NOT
mmu-miR-133a-3p	0.775373	0.0304232	NOT
mmu-miR-133a-5p	0.548336	0.112393	NOT
mmu-miR-133b-3p	0.845834	0.0290717	NOT
mmu-miR-133b-5p	-2.59158	0.568427	NOT
mmu-miR-134-3p	-0.218426	0.789496	NOT
mmu-miR-134-5p	-0.29179	0.067387	NOT
mmu-miR-135a-1-3p	-2.6777	0.500019	NOT
mmu-miR-135a-2-3p	3.14297	0.276165	NOT
mmu-miR-135a-5p	1.95722	1e-06	UP
mmu-miR-135b-3p	0.244584	0.829683	NOT
mmu-miR-135b-5p	0.465228	0.133898	NOT
mmu-miR-136-3p	-0.446795	0.00079259	NOT
mmu-miR-136-5p	-0.503036	0.000224644	NOT
mmu-miR-137-3p	-0.205647	0.809701	NOT
mmu-miR-137-5p	0	1	NOT
mmu-miR-138-1-3p	0.476226	1	NOT
mmu-miR-138-2-3p	-0.18056	1	NOT
mmu-miR-138-5p	0.357666	0.282331	NOT
mmu-miR-139-3p	-1.04951	3.51916e-05	DOWN
mmu-miR-139-5p	-0.345135	0.00581998	NOT
mmu-miR-140-3p	0.357176	0.00117997	NOT
mmu-miR-140-5p	0.243104	0.0264677	NOT
mmu-miR-141-3p	0.0690081	0.556438	NOT
mmu-miR-141-5p	0.0526702	0.774507	NOT
mmu-miR-142a-3p	0.272845	0.0317497	NOT
mmu-miR-142a-5p	0.192665	0.113237	NOT
mmu-miR-142b	-1.64593	0.0819493	NOT
mmu-miR-143-3p	0.137065	0.205711	NOT
mmu-miR-143-5p	0.283633	0.0116596	NOT
mmu-miR-144-3p	-0.436975	0.00756653	NOT
mmu-miR-144-5p	-0.612788	0.00233034	NOT
mmu-miR-145a-3p	0.10566	0.370942	NOT
mmu-miR-145a-5p	0.0338114	0.780177	NOT
mmu-miR-145b	-0.359888	0.221619	NOT
mmu-miR-146a-3p	0.574823	0.132578	NOT
mmu-miR-146a-5p	0.57949	1e-06	NOT
mmu-miR-146b-3p	1.28696	1e-06	UP
mmu-miR-146b-5p	1.02774	1e-06	UP
mmu-miR-147-3p	0.00601724	1	NOT
mmu-miR-147-5p	-1.3115	0.00134134	DOWN
mmu-miR-148a-3p	0.0771993	0.47204	NOT
mmu-miR-148a-5p	-0.0394189	0.750394	NOT
mmu-miR-148b-3p	0.109492	0.431441	NOT
mmu-miR-148b-5p	0.195211	0.131067	NOT
mmu-miR-149-5p	-0.0786896	0.549241	NOT
mmu-miR-150-3p	-0.108261	0.60697	NOT
mmu-miR-150-5p	-0.0998936	0.425141	NOT
mmu-miR-151-3p	0.21235	0.0512914	NOT
mmu-miR-151-5p	0.0416395	0.732992	NOT
mmu-miR-152-3p	0.100196	0.366544	NOT
mmu-miR-152-5p	-0.0944585	0.468735	NOT
mmu-miR-153-3p	0.219056	0.104061	NOT
mmu-miR-153-5p	-0.0403708	0.936284	NOT
mmu-miR-154-3p	-0.130767	0.695759	NOT
mmu-miR-154-5p	-0.265994	0.15896	NOT
mmu-miR-155-3p	-0.752043	0.3333	NOT
mmu-miR-155-5p	-0.320093	0.00987023	NOT
mmu-miR-15a-3p	-0.134959	0.508333	NOT
mmu-miR-15a-5p	-0.14532	0.247661	NOT
mmu-miR-15b-3p	-0.405421	0.00187052	NOT
mmu-miR-15b-5p	-0.436318	0.000570884	NOT
mmu-miR-16-1-3p	0.227983	0.103656	NOT
mmu-miR-16-2-3p	-0.0079956	0.965454	NOT
mmu-miR-16-5p	-0.191307	0.0835916	NOT
mmu-miR-1668	0.227089	0.321313	NOT
mmu-miR-17-3p	-0.267175	0.0515194	NOT
mmu-miR-17-5p	-0.273098	0.032229	NOT
mmu-miR-181a-1-3p	0.072241	0.586982	NOT
mmu-miR-181a-2-3p	0.333975	0.0176265	NOT
mmu-miR-181a-5p	-0.0574902	0.58472	NOT
mmu-miR-181b-1-3p	0.0364183	0.849885	NOT
mmu-miR-181b-2-3p	0.412004	0.283738	NOT
mmu-miR-181b-5p	0.21017	0.0638253	NOT
mmu-miR-181c-3p	0.41011	0.00365411	NOT
mmu-miR-181c-5p	0.0490857	0.685432	NOT
mmu-miR-181d-3p	0.663863	0.147437	NOT
mmu-miR-181d-5p	0.328307	0.00499615	NOT
mmu-miR-182-3p	-0.679847	0.0131626	NOT
mmu-miR-182-5p	-0.39507	0.000531074	NOT
mmu-miR-183-3p	-0.602431	0.0260037	NOT
mmu-miR-183-5p	-0.409481	0.000580944	NOT
mmu-miR-1839-3p	0.310008	0.0335987	NOT
mmu-miR-1839-5p	0.123964	0.253248	NOT
mmu-miR-184-3p	0.497964	0.0230995	NOT
mmu-miR-1843a-3p	0.219067	0.259768	NOT
mmu-miR-1843a-5p	-0.112077	0.378354	NOT
mmu-miR-1843b-3p	-0.37983	0.00947335	NOT
mmu-miR-1843b-5p	-0.133662	0.303679	NOT
mmu-miR-185-3p	0.1664	0.322162	NOT
mmu-miR-185-5p	-0.0534522	0.64923	NOT
mmu-miR-186-3p	-0.289758	0.477708	NOT
mmu-miR-186-5p	0.124734	0.2973	NOT
mmu-miR-187-3p	-0.0494429	0.692747	NOT
mmu-miR-187-5p	-0.154936	0.495822	NOT
mmu-miR-188-3p	0.276889	0.829976	NOT
mmu-miR-188-5p	0.142844	0.516725	NOT
mmu-miR-1895	-0.388751	1	NOT
mmu-miR-18a-3p	-0.110894	0.572565	NOT
mmu-miR-18a-5p	-0.066261	0.658838	NOT
mmu-miR-18b-3p	-0.0287567	1	NOT
mmu-miR-18b-5p	0.317445	0.454372	NOT
mmu-miR-1902	1.85864	1	NOT
mmu-miR-190a-3p	0.214845	0.749563	NOT
mmu-miR-190a-5p	0.131203	0.428229	NOT
mmu-miR-190b-3p	0.141727	1	NOT
mmu-miR-190b-5p	-0.0533024	0.841504	NOT
mmu-miR-191-3p	0.340827	0.0770306	NOT
mmu-miR-191-5p	-0.0366632	0.762173	NOT
mmu-miR-1912-3p	0.82942	0.0110962	NOT
mmu-miR-1912-5p	0.409675	0.0764772	NOT
mmu-miR-192-3p	-0.178394	1	NOT
mmu-miR-192-5p	-0.223667	0.0504368	NOT
mmu-miR-1927	-0.449643	0.212159	NOT
mmu-miR-1929-3p	-1.35985	0.647039	NOT
mmu-miR-1929-5p	-0.0755513	0.905965	NOT
mmu-miR-1930-3p	-1.3464	0.11529	NOT
mmu-miR-1930-5p	-0.0936359	0.880895	NOT
mmu-miR-1931	-0.042749	1	NOT
mmu-miR-1932	-0.815024	0.598426	NOT
mmu-miR-1933-3p	-1.07524	0.0211534	DOWN
mmu-miR-1933-5p	1.25196	0.275708	NOT
mmu-miR-1934-3p	-0.27653	1	NOT
mmu-miR-1934-5p	-0.274292	0.568889	NOT
mmu-miR-1936	-0.0365692	1	NOT
mmu-miR-1938	-3.18265	0.279583	NOT
mmu-miR-193a-3p	0.310253	0.163457	NOT
mmu-miR-193a-5p	0.0689754	0.650333	NOT
mmu-miR-193b-3p	-0.298008	0.102007	NOT
mmu-miR-193b-5p	0.215524	0.631371	NOT
mmu-miR-194-1-3p	-2.00578	0.244439	NOT
mmu-miR-194-2-3p	0.137726	0.659866	NOT
mmu-miR-194-5p	-0.241223	0.0272322	NOT
mmu-miR-1941-3p	0.222439	0.288915	NOT
mmu-miR-1941-5p	0.0611749	0.895364	NOT
mmu-miR-1943-3p	0.186517	0.642028	NOT
mmu-miR-1943-5p	0.39426	0.0373856	NOT
mmu-miR-1945	0.17459	0.884466	NOT
mmu-miR-1946a	0.846452	0.699982	NOT
mmu-miR-1946b	-0.892136	1	NOT
mmu-miR-1947-3p	-1.9323	1	NOT
mmu-miR-1947-5p	-0.342724	0.196461	NOT
mmu-miR-1948-3p	0.0176831	1	NOT
mmu-miR-1948-5p	1.03359	0.0164111	UP
mmu-miR-1949	-1.21988	0.185814	NOT
mmu-miR-1950	0.500603	0.650526	NOT
mmu-miR-1951	-1.86796	1	NOT
mmu-miR-1953	0.146119	1	NOT
mmu-miR-1954	-0.0706044	0.815089	NOT
mmu-miR-1955-3p	0.0155071	1	NOT
mmu-miR-1955-5p	0.483922	0.152614	NOT
mmu-miR-1956	2.22981	0.0275661	UP
mmu-miR-1958	-0.0541568	1	NOT
mmu-miR-195a-3p	0.489574	0.00024715	NOT
mmu-miR-195a-5p	0.338703	0.00282717	NOT
mmu-miR-195b	0.539367	0.321475	NOT
mmu-miR-1960	-0.117571	1	NOT
mmu-miR-1961	-0.0328578	1	NOT
mmu-miR-1963	0	1	NOT
mmu-miR-1964-3p	0.60647	0.00015704	NOT
mmu-miR-1966-3p	-0.944471	0.00939555	NOT
mmu-miR-1966-5p	0.481368	1	NOT
mmu-miR-1968-3p	-1.38114	0.711098	NOT
mmu-miR-1968-5p	0.854249	0.00243443	NOT
mmu-miR-1969	-0.858108	0.0486609	NOT
mmu-miR-196a-1-3p	-0.799786	0.351678	NOT
mmu-miR-196a-5p	-1.73164	0.000278311	DOWN
mmu-miR-196b-5p	-0.692623	0.0407727	NOT
mmu-miR-1970	-0.32792	1	NOT
mmu-miR-1970b-5p	0.354792	1	NOT
mmu-miR-1970c-3p	-2.6777	0.500019	NOT
mmu-miR-1970c-5p	0.250252	0.882265	NOT
mmu-miR-1971	0	1	NOT
mmu-miR-1981-3p	0.296571	0.0602672	NOT
mmu-miR-1981-5p	0.0900452	0.469565	NOT
mmu-miR-1982-3p	-0.53001	0.32721	NOT
mmu-miR-1982-5p	3.13621	0.352641	NOT
mmu-miR-1983	0.049335	0.801358	NOT
mmu-miR-199a-3p	0.0489527	0.644801	NOT
mmu-miR-199a-5p	-0.132183	0.235466	NOT
mmu-miR-199b-3p	0.0489083	0.644602	NOT
mmu-miR-199b-5p	-0.0855188	0.465586	NOT
mmu-miR-19a-3p	0.0738016	0.66466	NOT
mmu-miR-19a-5p	0.759784	1	NOT
mmu-miR-19b-1-5p	-0.361771	0.303171	NOT
mmu-miR-19b-3p	-0.0713964	0.653233	NOT
mmu-miR-1a-1-5p	0.254266	1	NOT
mmu-miR-1a-2-5p	0	1	NOT
mmu-miR-1a-3p	0.776418	0.00905853	NOT
mmu-miR-1b-3p	0.31258	0.406721	NOT
mmu-miR-1b-5p	-0.086411	1	NOT
mmu-miR-200a-3p	0.167163	0.110913	NOT
mmu-miR-200a-5p	0.190864	0.121557	NOT
mmu-miR-200b-3p	0.220689	0.0354946	NOT
mmu-miR-200b-5p	0.173919	0.200952	NOT
mmu-miR-200c-3p	-0.130695	0.230801	NOT
mmu-miR-200c-5p	-0.384619	0.23568	NOT
mmu-miR-201-3p	-1.93207	1	NOT
mmu-miR-201-5p	0.313038	0.707936	NOT
mmu-miR-202-5p	1.14365	0.468035	NOT
mmu-miR-203-3p	0.147096	0.270157	NOT
mmu-miR-203-5p	0.396694	0.261086	NOT
mmu-miR-203b-3p	0.0779076	0.917234	NOT
mmu-miR-204-3p	0.756379	1	NOT
mmu-miR-204-5p	0.796632	2.86637e-05	NOT
mmu-miR-205-3p	-3.18265	0.279672	NOT
mmu-miR-205-5p	-0.460504	0.0539983	NOT
mmu-miR-206-3p	-1.94912	8.39544e-06	DOWN
mmu-miR-208a-3p	1.26812	0.000250911	UP
mmu-miR-208a-5p	0.502126	0.533744	NOT
mmu-miR-208b-3p	0.0993128	0.603478	NOT
mmu-miR-208b-5p	1.85829	1	NOT
mmu-miR-20a-3p	-0.0996187	0.751273	NOT
mmu-miR-20a-5p	-0.253916	0.0734388	NOT
mmu-miR-20b-3p	0	1	NOT
mmu-miR-20b-5p	0.433739	0.00783678	NOT
mmu-miR-210-3p	0.19835	0.140501	NOT
mmu-miR-210-5p	-0.643281	0.056416	NOT
mmu-miR-211-3p	-3.07615	0.352641	NOT
mmu-miR-211-5p	0.546933	0.0925904	NOT
mmu-miR-212-3p	-0.148792	0.589562	NOT
mmu-miR-212-5p	-0.11736	0.489766	NOT
mmu-miR-2137	-0.598232	0.438558	NOT
mmu-miR-214-3p	-0.185384	0.115414	NOT
mmu-miR-214-5p	-0.200699	0.111656	NOT
mmu-miR-215-3p	0.551959	0.573418	NOT
mmu-miR-215-5p	-0.327477	0.337662	NOT
mmu-miR-216a-3p	0.756676	1	NOT
mmu-miR-216a-5p	1.11116	0.381858	NOT
mmu-miR-216b-3p	-1.90188	1	NOT
mmu-miR-216b-5p	-0.131986	1	NOT
mmu-miR-216c-5p	-2.52618	0.139256	NOT
mmu-miR-217-5p	-0.619535	0.0958063	NOT
mmu-miR-218-1-3p	-0.0502599	0.928447	NOT
mmu-miR-218-2-3p	-2.24329	0.129559	NOT
mmu-miR-218-5p	0.016395	0.885343	NOT
mmu-miR-219a-1-3p	0.166713	0.606916	NOT
mmu-miR-219a-2-3p	4.10976	0.0542526	NOT
mmu-miR-219a-5p	0.120704	0.815975	NOT
mmu-miR-219b-3p	1.31372	0.711098	NOT
mmu-miR-219b-5p	0.495549	1	NOT
mmu-miR-219c-3p	-3.5603	0.125029	NOT
mmu-miR-219c-5p	1.19848	0.075551	NOT
mmu-miR-21a-3p	0.393139	0.103878	NOT
mmu-miR-21a-5p	0.0477571	0.687376	NOT
mmu-miR-21b	0.0524843	0.839102	NOT
mmu-miR-21c	-0.177496	0.520247	NOT
mmu-miR-22-3p	0.0730366	0.520945	NOT
mmu-miR-22-5p	0.27229	0.0297528	NOT
mmu-miR-221-3p	-0.063869	0.600086	NOT
mmu-miR-221-5p	0.171794	0.245484	NOT
mmu-miR-222-3p	0.058752	0.632192	NOT
mmu-miR-222-5p	-0.146054	0.418546	NOT
mmu-miR-223-3p	-0.11183	0.488351	NOT
mmu-miR-223-5p	-0.397309	0.0110128	NOT
mmu-miR-224-3p	0.0228681	1	NOT
mmu-miR-224-5p	-0.883685	1e-06	NOT
mmu-miR-23a-3p	-0.129732	0.275711	NOT
mmu-miR-23a-5p	-0.166392	0.655341	NOT
mmu-miR-23b-3p	0.0274831	0.81919	NOT
mmu-miR-23b-5p	0.0986194	0.644655	NOT
mmu-miR-24-1-5p	0.313531	0.0118319	NOT
mmu-miR-24-2-5p	0.000867862	0.99383	NOT
mmu-miR-24-3p	0.238337	0.0272553	NOT
mmu-miR-25-3p	-0.247513	0.0302208	NOT
mmu-miR-25-5p	-0.126932	0.518555	NOT
mmu-miR-26a-1-3p	0.156312	0.523408	NOT
mmu-miR-26a-2-3p	-0.0444383	0.792169	NOT
mmu-miR-26a-5p	-0.0795425	0.459806	NOT
mmu-miR-26b-3p	0.248412	0.114376	NOT
mmu-miR-26b-5p	-0.0269877	0.793491	NOT
mmu-miR-27a-3p	0.135442	0.202709	NOT
mmu-miR-27a-5p	-0.492976	0.00212604	NOT
mmu-miR-27b-3p	0.416376	0.000174807	NOT
mmu-miR-27b-5p	0.359363	0.006878	NOT
mmu-miR-28a-3p	0.348203	0.00808463	NOT
mmu-miR-28a-5p	0.132111	0.252566	NOT
mmu-miR-28b	1.73173	0.0184469	UP
mmu-miR-28c	0.078212	0.627498	NOT
mmu-miR-290a-5p	0	1	NOT
mmu-miR-290b-5p	0	1	NOT
mmu-miR-291a-3p	-0.850002	0.46203	NOT
mmu-miR-291a-5p	-0.919871	0.703272	NOT
mmu-miR-291b-5p	0	1	NOT
mmu-miR-292a-3p	-0.657177	0.51669	NOT
mmu-miR-292a-5p	0.18759	0.742851	NOT
mmu-miR-292b-5p	0	1	NOT
mmu-miR-293-3p	-0.0316553	1	NOT
mmu-miR-293-5p	0.257405	0.84329	NOT
mmu-miR-294-3p	-0.660982	0.49863	NOT
mmu-miR-295-3p	-0.738181	0.140482	NOT
mmu-miR-296-3p	0.396368	0.082338	NOT
mmu-miR-296-5p	-0.374206	0.0078388	NOT
mmu-miR-297a-3p	0.607912	0.00243625	NOT
mmu-miR-297a-5p	0.897947	0.072176	NOT
mmu-miR-297b-3p	0.607932	0.00241162	NOT
mmu-miR-297b-5p	0.922704	0.00130712	NOT
mmu-miR-297c-3p	0.607953	0.00238567	NOT
mmu-miR-297c-5p	-0.815594	1	NOT
mmu-miR-298-3p	-0.60906	0.0744324	NOT
mmu-miR-298-5p	0.149873	0.337359	NOT
mmu-miR-299a-3p	-0.384422	0.0156887	NOT
mmu-miR-299a-5p	-0.813307	1.43117e-05	NOT
mmu-miR-299b-3p	1.92386	0.269231	NOT
mmu-miR-299b-5p	2.60217	0.568427	NOT
mmu-miR-29a-3p	-0.289186	0.00748057	NOT
mmu-miR-29a-5p	-0.480584	0.022842	NOT
mmu-miR-29b-1-5p	-0.726583	0.00370115	NOT
mmu-miR-29b-2-5p	0.129359	0.493682	NOT
mmu-miR-29b-3p	-0.361453	0.00261636	NOT
mmu-miR-29c-3p	-0.140345	0.324918	NOT
mmu-miR-29c-5p	0.0978232	0.475724	NOT
mmu-miR-300-3p	-0.257843	0.0738649	NOT
mmu-miR-300-5p	-0.92206	0.214964	NOT
mmu-miR-301a-3p	0.229609	0.160185	NOT
mmu-miR-301a-5p	-0.00642171	0.969884	NOT
mmu-miR-301b-3p	0.0627577	0.88051	NOT
mmu-miR-301b-5p	-0.0522351	1	NOT
mmu-miR-302b-3p	1.85812	1	NOT
mmu-miR-302d-3p	0	1	NOT
mmu-miR-3057-3p	0.267054	0.825957	NOT
mmu-miR-3057-5p	0.184259	0.428837	NOT
mmu-miR-3058-3p	0.574083	0.521583	NOT
mmu-miR-3058-5p	-0.107477	0.9352	NOT
mmu-miR-3059-5p	-1.86839	1	NOT
mmu-miR-3060-3p	0.195487	0.485755	NOT
mmu-miR-3061-3p	-0.420686	0.275254	NOT
mmu-miR-3061-5p	0.169065	0.821405	NOT
mmu-miR-3062-5p	1.01849	0.127394	NOT
mmu-miR-3063-3p	-0.0150711	1	NOT
mmu-miR-3064-3p	0.107627	1	NOT
mmu-miR-3064-5p	0.237284	0.479932	NOT
mmu-miR-3065-3p	1.85277	1	NOT
mmu-miR-3065-5p	0.408232	0.703555	NOT
mmu-miR-3066-3p	-0.947011	0.527049	NOT
mmu-miR-3066-5p	-0.371173	0.106816	NOT
mmu-miR-3067-5p	-2.67767	0.500019	NOT
mmu-miR-3068-3p	0.249878	0.065024	NOT
mmu-miR-3068-5p	0.404164	0.00145098	NOT
mmu-miR-3069-3p	-0.685316	0.200553	NOT
mmu-miR-3069-5p	0.41071	1	NOT
mmu-miR-3070-2-3p	1.85308	1	NOT
mmu-miR-3070-5p	0	1	NOT
mmu-miR-3072-3p	-1.39855	1e-06	DOWN
mmu-miR-3072-5p	1.85339	1	NOT
mmu-miR-3073a-3p	2.7242	0.568427	NOT
mmu-miR-3073b-5p	1.85371	1	NOT
mmu-miR-3074-1-3p	-0.860226	0.000123287	NOT
mmu-miR-3074-2-3p	0	1	NOT
mmu-miR-3074-5p	-0.353289	0.0287573	NOT
mmu-miR-3075-5p	-0.115026	1	NOT
mmu-miR-3076-3p	0.697281	0.202931	NOT
mmu-miR-3076-5p	0.191878	1	NOT
mmu-miR-3077-3p	0.718908	0.612149	NOT
mmu-miR-3077-5p	2.63436	0.568427	NOT
mmu-miR-3079-3p	0.915393	0.578167	NOT
mmu-miR-3079-5p	0.508964	0.358706	NOT
mmu-miR-3080-3p	0	1	NOT
mmu-miR-3080-5p	0.210801	1	NOT
mmu-miR-3081-3p	-0.086379	0.483828	NOT
mmu-miR-3081-5p	-0.0165633	1	NOT
mmu-miR-3082-3p	0.0760321	0.818999	NOT
mmu-miR-3082-5p	-2.15453	0.0422758	DOWN
mmu-miR-3083-3p	-1.09933	0.552259	NOT
mmu-miR-3083-5p	-0.414113	0.20936	NOT
mmu-miR-3083b-3p	0	1	NOT
mmu-miR-3084-3p	-0.232656	0.441179	NOT
mmu-miR-3084-5p	-0.379939	0.174674	NOT
mmu-miR-3085-3p	-0.752423	1	NOT
mmu-miR-3086-3p	1.85406	1	NOT
mmu-miR-3086-5p	0.539006	0.284242	NOT
mmu-miR-3087-3p	0.943288	0.452268	NOT
mmu-miR-3087-5p	-0.0467219	1	NOT
mmu-miR-3088-3p	-0.941791	0.239502	NOT
mmu-miR-3089-3p	-1.07895	0.0665204	NOT
mmu-miR-3089-5p	1.85448	1	NOT
mmu-miR-3090-3p	0.484229	1	NOT
mmu-miR-3091-3p	-0.347156	0.84152	NOT
mmu-miR-3091-5p	-0.0168457	1	NOT
mmu-miR-3092-3p	-0.024395	1	NOT
mmu-miR-3094-3p	-0.407512	1	NOT
mmu-miR-3094-5p	0.552721	0.497117	NOT
mmu-miR-3095-3p	0.0986329	0.849603	NOT
mmu-miR-3095-5p	0.535914	0.53936	NOT
mmu-miR-3097-3p	-0.347638	0.287294	NOT
mmu-miR-3097-5p	-1.43644	2.52633e-05	DOWN
mmu-miR-3098-3p	-0.352063	0.644133	NOT
mmu-miR-3098-5p	0.724864	0.577481	NOT
mmu-miR-3099-3p	-1.07906	0.00136306	DOWN
mmu-miR-3099-5p	0	1	NOT
mmu-miR-30a-3p	-0.269951	0.0170031	NOT
mmu-miR-30a-5p	-0.240479	0.0315225	NOT
mmu-miR-30b-3p	-0.153249	0.26011	NOT
mmu-miR-30b-5p	-0.193305	0.0837587	NOT
mmu-miR-30c-1-3p	0.0204426	0.895887	NOT
mmu-miR-30c-2-3p	-0.318255	0.00907096	NOT
mmu-miR-30c-5p	-0.207034	0.0821549	NOT
mmu-miR-30d-3p	-0.332392	0.00452025	NOT
mmu-miR-30d-5p	-0.155577	0.153244	NOT
mmu-miR-30e-3p	-0.0529726	0.639446	NOT
mmu-miR-30e-5p	0.0926855	0.439475	NOT
mmu-miR-30f	-0.543284	0.805298	NOT
mmu-miR-31-3p	-0.162634	0.351641	NOT
mmu-miR-31-5p	-0.04907	0.667104	NOT
mmu-miR-3100-5p	0.390277	0.809723	NOT
mmu-miR-3101-3p	0	1	NOT
mmu-miR-3101-5p	1.2562	0.276226	NOT
mmu-miR-3102-3p	0.406788	0.011915	NOT
mmu-miR-3102-3p.2-3p	0.4068	0.0117889	NOT
mmu-miR-3102-5p	0.185269	0.565272	NOT
mmu-miR-3102-5p.2-5p	0.185209	0.564827	NOT
mmu-miR-3103-3p	0.240445	0.70205	NOT
mmu-miR-3103-5p	-0.336636	1	NOT
mmu-miR-3105-3p	0.86394	0.00301934	NOT
mmu-miR-3105-5p	0.713493	0.377793	NOT
mmu-miR-3108-3p	-0.0219408	1	NOT
mmu-miR-3108-5p	1.38447	0.340221	NOT
mmu-miR-3109-3p	-0.138669	0.763394	NOT
mmu-miR-3109-5p	-0.145481	0.893111	NOT
mmu-miR-3110-5p	-0.415356	0.298185	NOT
mmu-miR-3112-3p	0.0127019	1	NOT
mmu-miR-3112-5p	-1.53322	0.0845743	NOT
mmu-miR-3113-3p	1.8945	1	NOT
mmu-miR-3113-5p	-0.453402	1	NOT
mmu-miR-3154	1.42608	0.349001	NOT
mmu-miR-32-3p	-0.028552	0.890869	NOT
mmu-miR-32-5p	0.234963	0.0315721	NOT
mmu-miR-320-3p	0.175707	0.166829	NOT
mmu-miR-320-5p	0.403389	1	NOT
mmu-miR-322-3p	-0.0402119	0.722972	NOT
mmu-miR-322-5p	-0.456889	0.000408103	NOT
mmu-miR-323-3p	-0.450966	0.0864041	NOT
mmu-miR-323-5p	-1.7547	0.518497	NOT
mmu-miR-324-3p	0.0555102	0.721063	NOT
mmu-miR-324-5p	-0.364544	0.0128547	NOT
mmu-miR-325-3p	-0.0464836	1	NOT
mmu-miR-325-5p	-0.622025	1	NOT
mmu-miR-326-3p	-0.00772912	0.950367	NOT
mmu-miR-326-5p	-1.42465	0.137293	NOT
mmu-miR-328-3p	0.173128	0.124021	NOT
mmu-miR-328-5p	0.767865	1	NOT
mmu-miR-329-3p	-0.498225	0.000642666	NOT
mmu-miR-329-5p	-0.166029	0.276457	NOT
mmu-miR-33-3p	-0.0832533	0.759545	NOT
mmu-miR-33-5p	0.665834	0.000842662	NOT
mmu-miR-330-3p	0.146549	0.266793	NOT
mmu-miR-330-5p	-0.0463062	0.700858	NOT
mmu-miR-331-3p	0.196657	0.167954	NOT
mmu-miR-331-5p	-0.0856854	0.691678	NOT
mmu-miR-335-3p	-0.0700183	0.611522	NOT
mmu-miR-335-5p	-0.100408	0.526494	NOT
mmu-miR-337-3p	-0.674718	0.0341433	NOT
mmu-miR-337-5p	-0.215992	0.0963261	NOT
mmu-miR-338-3p	0.35037	0.0353061	NOT
mmu-miR-338-5p	0.193841	0.163214	NOT
mmu-miR-339-3p	0.0175143	0.900048	NOT
mmu-miR-339-5p	-0.186356	0.120381	NOT
mmu-miR-340-3p	-0.0900934	0.464011	NOT
mmu-miR-340-5p	-0.0537534	0.664879	NOT
mmu-miR-341-3p	-0.217779	0.416391	NOT
mmu-miR-341-5p	-1.33837	0.65086	NOT
mmu-miR-342-3p	0.00336112	0.978351	NOT
mmu-miR-342-5p	-0.101883	0.498808	NOT
mmu-miR-344-3p	-0.0123881	0.951991	NOT
mmu-miR-344-5p	0	1	NOT
mmu-miR-344b-3p	-0.0452813	1	NOT
mmu-miR-344c-3p	0.729897	0.686062	NOT
mmu-miR-344d-2-5p	0	1	NOT
mmu-miR-344d-3-5p	1.93883	0.230947	NOT
mmu-miR-344d-3p	-0.550462	0.434197	NOT
mmu-miR-344e-3p	-0.544275	1	NOT
mmu-miR-344f-3p	0.110153	1	NOT
mmu-miR-344g-3p	0.785932	0.214175	NOT
mmu-miR-344g-5p	-1.90164	1	NOT
mmu-miR-344i	0.759859	1	NOT
mmu-miR-345-3p	0.0816708	0.530931	NOT
mmu-miR-345-5p	-0.203714	0.137849	NOT
mmu-miR-346-5p	1.64139	0.375048	NOT
mmu-miR-3470a	-0.673614	0.0983101	NOT
mmu-miR-3470b	-0.55523	0.065732	NOT
mmu-miR-3472	0.733493	1	NOT
mmu-miR-3473a	0.45003	0.354575	NOT
mmu-miR-3473b	-0.390968	0.305579	NOT
mmu-miR-3473d	0.492724	0.184134	NOT
mmu-miR-3473e	0.0724928	1	NOT
mmu-miR-3473g	1.6039	0.12003	NOT
mmu-miR-3474	-0.684468	0.0567254	NOT
mmu-miR-3475-3p	0.753207	0.468332	NOT
mmu-miR-34a-3p	-0.735357	0.0431532	NOT
mmu-miR-34a-5p	-0.286429	0.0282841	NOT
mmu-miR-34b-3p	-0.0974966	0.503504	NOT
mmu-miR-34b-5p	-0.273788	0.0281062	NOT
mmu-miR-34c-3p	-0.305054	0.0322671	NOT
mmu-miR-34c-5p	-0.218696	0.116827	NOT
mmu-miR-350-3p	0.241214	0.083281	NOT
mmu-miR-350-5p	0.0665274	0.743574	NOT
mmu-miR-351-3p	-0.045207	0.789939	NOT
mmu-miR-351-5p	0.0510252	0.664022	NOT
mmu-miR-3535	-0.176737	0.23771	NOT
mmu-miR-3547-3p	1.25634	0.275267	NOT
mmu-miR-3552	0.242347	1	NOT
mmu-miR-3569-3p	-0.0171275	1	NOT
mmu-miR-3569-5p	-1.74609	0.431217	NOT
mmu-miR-3572-3p	-0.336772	0.45563	NOT
mmu-miR-3572-5p	-0.389725	1	NOT
mmu-miR-361-3p	0.316336	0.00757414	NOT
mmu-miR-361-5p	0.0923859	0.448048	NOT
mmu-miR-3618-5p	0	1	NOT
mmu-miR-362-3p	0.314526	0.0525247	NOT
mmu-miR-362-5p	0.0451822	0.743557	NOT
mmu-miR-363-3p	0.556766	0.00176256	NOT
mmu-miR-363-5p	0.138042	0.842664	NOT
mmu-miR-365-1-5p	-0.189414	0.639142	NOT
mmu-miR-365-2-5p	-0.261148	0.219348	NOT
mmu-miR-365-3p	-0.057453	0.668745	NOT
mmu-miR-369-3p	-0.18043	0.2108	NOT
mmu-miR-369-5p	-0.499647	0.00162778	NOT
mmu-miR-370-3p	-0.331634	0.0293161	NOT
mmu-miR-370-5p	0.0988211	1	NOT
mmu-miR-374b-5p	0.114969	0.340338	NOT
mmu-miR-374c-3p	2.6485	0.500162	NOT
mmu-miR-374c-5p	0.34415	1	NOT
mmu-miR-375-3p	0.186786	0.173601	NOT
mmu-miR-376a-3p	-0.9691	0.0102193	NOT
mmu-miR-376a-5p	-0.80453	7.61844e-06	NOT
mmu-miR-376b-3p	-0.247007	0.170257	NOT
mmu-miR-376b-5p	-0.579549	0.000835353	NOT
mmu-miR-376c-3p	-0.798302	1e-06	NOT
mmu-miR-376c-5p	-1.06726	0.0153564	DOWN
mmu-miR-377-3p	-0.20135	0.45268	NOT
mmu-miR-377-5p	-0.990771	0.013669	NOT
mmu-miR-378a-3p	0.226412	0.0900885	NOT
mmu-miR-378a-5p	-0.0114082	0.951347	NOT
mmu-miR-378b	0.516702	0.00282649	NOT
mmu-miR-378c	0.240484	0.0842534	NOT
mmu-miR-378d	0.230754	0.100476	NOT
mmu-miR-379-3p	-0.398295	0.010973	NOT
mmu-miR-379-5p	-0.570318	9.81229e-06	NOT
mmu-miR-380-3p	-0.304272	0.161986	NOT
mmu-miR-380-5p	-1.18085	1e-06	DOWN
mmu-miR-381-3p	-0.403119	0.00378616	NOT
mmu-miR-381-5p	-0.0316754	1	NOT
mmu-miR-382-3p	-0.210769	0.287661	NOT
mmu-miR-382-5p	-0.51651	8.98544e-05	NOT
mmu-miR-383-5p	-0.455973	0.0892876	NOT
mmu-miR-384-3p	1.64327	0.0526115	NOT
mmu-miR-384-5p	-0.137683	1	NOT
mmu-miR-3960	0	1	NOT
mmu-miR-3962	-0.269467	0.480111	NOT
mmu-miR-3963	-0.910323	0.000542901	NOT
mmu-miR-3964	-0.252723	0.494248	NOT
mmu-miR-3966	-0.387663	1	NOT
mmu-miR-3967	-0.0463665	1	NOT
mmu-miR-3968	0.133913	0.450933	NOT
mmu-miR-3969	-0.155629	0.863288	NOT
mmu-miR-3970	-0.182856	0.213225	NOT
mmu-miR-3971	0	1	NOT
mmu-miR-409-3p	-0.0283117	0.87341	NOT
mmu-miR-409-5p	-0.485494	0.000961757	NOT
mmu-miR-410-3p	-0.674815	0.000227751	NOT
mmu-miR-410-5p	0.365578	0.804643	NOT
mmu-miR-411-3p	-0.323145	0.0358503	NOT
mmu-miR-411-5p	-0.539904	1.87047e-06	NOT
mmu-miR-412-3p	-0.696633	0.628646	NOT
mmu-miR-412-5p	-0.639387	0.0256913	NOT
mmu-miR-421-3p	-0.160944	0.281944	NOT
mmu-miR-421-5p	-0.563231	0.778637	NOT
mmu-miR-423-3p	-0.0727772	0.515739	NOT
mmu-miR-423-5p	-0.0149227	0.906311	NOT
mmu-miR-425-3p	0.236263	0.0722406	NOT
mmu-miR-425-5p	0.196228	0.10445	NOT
mmu-miR-429-3p	0.0186769	0.869435	NOT
mmu-miR-431-3p	-0.243142	0.582551	NOT
mmu-miR-431-5p	-0.559214	0.000581362	NOT
mmu-miR-433-3p	-0.502962	0.000217067	NOT
mmu-miR-433-5p	-0.443873	0.385854	NOT
mmu-miR-434-3p	-0.833159	1e-06	NOT
mmu-miR-434-5p	-0.474908	8.81966e-05	NOT
mmu-miR-448-3p	0.571587	0.0631884	NOT
mmu-miR-448-5p	-1.24575	0.704979	NOT
mmu-miR-449a-3p	1.43799	5.79684e-05	UP
mmu-miR-449a-5p	0.128385	0.438539	NOT
mmu-miR-449b	0.775348	0.706978	NOT
mmu-miR-449c-3p	-0.0456647	1	NOT
mmu-miR-449c-5p	1.12327	1e-06	UP
mmu-miR-450a-1-3p	0.257527	0.159273	NOT
mmu-miR-450a-2-3p	0.368569	0.0895287	NOT
mmu-miR-450a-5p	-0.0487649	0.704311	NOT
mmu-miR-450b-3p	0.375965	0.00290152	NOT
mmu-miR-450b-5p	0.2216	0.0929921	NOT
mmu-miR-451a	-0.61979	7.58946e-05	NOT
mmu-miR-455-3p	-0.0604953	0.608703	NOT
mmu-miR-455-5p	-0.150113	0.182481	NOT
mmu-miR-463-3p	0	1	NOT
mmu-miR-463-5p	2.60217	0.568427	NOT
mmu-miR-465a-3p	0.75771	1	NOT
mmu-miR-465b-3p	0.757554	1	NOT
mmu-miR-465b-5p	2.60217	0.568427	NOT
mmu-miR-465c-3p	0.75761	1	NOT
mmu-miR-465c-5p	3.63992	0.233155	NOT
mmu-miR-466a-3p	0.485062	0.00414198	NOT
mmu-miR-466a-5p	0.596451	0.50139	NOT
mmu-miR-466b-3p	0.522706	0.00193782	NOT
mmu-miR-466b-5p	0.406574	0.125795	NOT
mmu-miR-466c-3p	0.527688	0.00148082	NOT
mmu-miR-466c-5p	0.302678	0.186604	NOT
mmu-miR-466d-3p	0.562302	0.00173858	NOT
mmu-miR-466d-5p	0.65882	0.188567	NOT
mmu-miR-466e-3p	0.526811	0.00149072	NOT
mmu-miR-466e-5p	0.246565	0.481554	NOT
mmu-miR-466f	1.10136	0.135614	NOT
mmu-miR-466g	0.593827	0.0592341	NOT
mmu-miR-466h-3p	0.619196	0.0915223	NOT
mmu-miR-466h-5p	0.804483	0.0034989	NOT
mmu-miR-466i-3p	1.23586	0.00391344	UP
mmu-miR-466i-5p	-0.72409	0.00435426	NOT
mmu-miR-466j	0.231481	0.78251	NOT
mmu-miR-466l-3p	-0.524829	1	NOT
mmu-miR-466m-3p	1.67393	0.034164	UP
mmu-miR-466m-5p	0.388929	0.554428	NOT
mmu-miR-466n-3p	-0.0292454	1	NOT
mmu-miR-466n-5p	0.658808	0.188506	NOT
mmu-miR-466o-3p	1.26127	0.710933	NOT
mmu-miR-466o-5p	0.417051	0.101161	NOT
mmu-miR-466p-3p	0.527698	0.00146915	NOT
mmu-miR-466p-5p	0.307836	0.377841	NOT
mmu-miR-467a-3p	0.239148	0.176021	NOT
mmu-miR-467a-5p	0.478682	0.00182462	NOT
mmu-miR-467b-3p	-0.911078	1	NOT
mmu-miR-467b-5p	0.478679	0.00181341	NOT
mmu-miR-467c-3p	-0.036311	1	NOT
mmu-miR-467c-5p	0.45558	0.00960745	NOT
mmu-miR-467d-3p	0.239168	0.175489	NOT
mmu-miR-467d-5p	0.620458	0.00978872	NOT
mmu-miR-467e-3p	0.0607183	1	NOT
mmu-miR-467e-5p	0.32406	0.032728	NOT
mmu-miR-467h	0.170835	1	NOT
mmu-miR-468-3p	0	1	NOT
mmu-miR-470-5p	2.64871	0.500859	NOT
mmu-miR-471-3p	-1.86881	1	NOT
mmu-miR-471-5p	1.89617	1	NOT
mmu-miR-483-3p	-1.56914	0.0104437	DOWN
mmu-miR-483-5p	0.84663	0.230207	NOT
mmu-miR-484	0.488226	2.87531e-05	NOT
mmu-miR-485-3p	0.0304743	0.873736	NOT
mmu-miR-485-5p	-0.463447	0.032258	NOT
mmu-miR-486a-3p	0.276809	0.104743	NOT
mmu-miR-486a-5p	-0.175167	0.248142	NOT
mmu-miR-486b-3p	0.263768	0.486043	NOT
mmu-miR-486b-5p	-0.173425	0.255058	NOT
mmu-miR-487b-3p	-0.373191	0.0943049	NOT
mmu-miR-487b-5p	2.7242	0.568427	NOT
mmu-miR-488-3p	-0.509283	0.289248	NOT
mmu-miR-488-5p	0	1	NOT
mmu-miR-489-3p	2.91448	0.000940833	UP
mmu-miR-490-3p	-0.140877	0.433404	NOT
mmu-miR-490-5p	-0.187989	0.363223	NOT
mmu-miR-491-3p	1.40078	0.0778358	NOT
mmu-miR-491-5p	-0.0170518	0.968416	NOT
mmu-miR-493-3p	-0.904386	0.0382807	NOT
mmu-miR-493-5p	-0.332643	0.150117	NOT
mmu-miR-494-3p	-0.542785	0.000307306	NOT
mmu-miR-494-5p	-0.654219	0.532329	NOT
mmu-miR-495-3p	0.304326	0.0885612	NOT
mmu-miR-495-5p	0	1	NOT
mmu-miR-496a-3p	-0.903257	1.36738e-05	NOT
mmu-miR-496a-5p	-3.86656	0.0745712	NOT
mmu-miR-497a-3p	0.841396	0.0197466	NOT
mmu-miR-497a-5p	0.281133	0.0104065	NOT
mmu-miR-497b	0.458999	0.257523	NOT
mmu-miR-499-3p	-0.0642618	1	NOT
mmu-miR-499-5p	0.745971	0.0063359	NOT
mmu-miR-500-3p	0.125198	0.489968	NOT
mmu-miR-500-5p	0.38837	0.440496	NOT
mmu-miR-501-3p	-0.104584	0.39223	NOT
mmu-miR-501-5p	0.226952	0.327245	NOT
mmu-miR-503-3p	-0.0859433	0.481553	NOT
mmu-miR-503-5p	-0.354348	0.00300259	NOT
mmu-miR-504-5p	0.616641	0.0599844	NOT
mmu-miR-505-3p	0.129891	0.485607	NOT
mmu-miR-505-5p	-0.575818	0.05154	NOT
mmu-miR-5099	0.0601263	0.701421	NOT
mmu-miR-5100	-0.169696	0.790994	NOT
mmu-miR-5101	-0.213464	0.603641	NOT
mmu-miR-5103	1.29825	0.264639	NOT
mmu-miR-5104	1.50256	0.0787189	NOT
mmu-miR-5106	0	1	NOT
mmu-miR-5107-3p	0.132575	0.869267	NOT
mmu-miR-5107-5p	0.0910831	0.89696	NOT
mmu-miR-5108	0	1	NOT
mmu-miR-511-3p	-0.0857595	0.652408	NOT
mmu-miR-511-5p	-0.148038	0.721662	NOT
mmu-miR-5112	0	1	NOT
mmu-miR-5113	0.0679274	0.852584	NOT
mmu-miR-5114	0.220683	0.471628	NOT
mmu-miR-5116	0.209889	0.779469	NOT
mmu-miR-5119	-2.59158	0.568427	NOT
mmu-miR-5120	0.846296	0.700468	NOT
mmu-miR-5121	-0.460269	0.22463	NOT
mmu-miR-5122	-0.0424778	1	NOT
mmu-miR-5123	-0.256156	0.439289	NOT
mmu-miR-5125	-0.0435273	1	NOT
mmu-miR-5126	-0.0997872	0.844431	NOT
mmu-miR-5127	-1.86964	1	NOT
mmu-miR-5128	0.325496	0.756824	NOT
mmu-miR-5129-3p	0.00818665	0.969491	NOT
mmu-miR-5129-5p	0.0470268	1	NOT
mmu-miR-5130	0	1	NOT
mmu-miR-5132-3p	0.130243	1	NOT
mmu-miR-5132-5p	0.475674	0.424537	NOT
mmu-miR-5134-3p	0.146048	1	NOT
mmu-miR-5134-5p	0.537015	0.640139	NOT
mmu-miR-532-3p	0.187975	0.294108	NOT
mmu-miR-532-5p	0.140568	0.207848	NOT
mmu-miR-539-3p	-1.27905	0.310159	NOT
mmu-miR-539-5p	-0.911334	0.0345905	NOT
mmu-miR-540-3p	0.0221621	0.948576	NOT
mmu-miR-540-5p	-0.184564	0.591967	NOT
mmu-miR-541-3p	-0.477131	0.135035	NOT
mmu-miR-541-5p	-0.360404	0.00210256	NOT
mmu-miR-542-3p	0.230923	0.112077	NOT
mmu-miR-542-5p	-0.473302	0.00699709	NOT
mmu-miR-543-3p	0.0931593	0.570337	NOT
mmu-miR-543-5p	-0.634979	0.32508	NOT
mmu-miR-544-3p	-1.35497	0.647472	NOT
mmu-miR-544-5p	1.85511	1	NOT
mmu-miR-547-3p	0.359221	0.226493	NOT
mmu-miR-547-5p	0	1	NOT
mmu-miR-551b-3p	-0.0179076	0.930247	NOT
mmu-miR-551b-5p	-0.118341	0.888386	NOT
mmu-miR-5615-3p	4.28615	0.0209034	UP
mmu-miR-5615-5p	0.127558	0.705816	NOT
mmu-miR-5616-3p	-0.767993	1	NOT
mmu-miR-5616-5p	-1.90165	1	NOT
mmu-miR-5617-5p	-1.32351	0.625029	NOT
mmu-miR-5619-3p	-0.815964	1	NOT
mmu-miR-5619-5p	-0.0103146	1	NOT
mmu-miR-5620-3p	0	1	NOT
mmu-miR-5620-5p	0.0905339	1	NOT
mmu-miR-5621-3p	0.214745	0.647437	NOT
mmu-miR-5621-5p	0	1	NOT
mmu-miR-5622-3p	0	1	NOT
mmu-miR-5622-5p	-1.90235	1	NOT
mmu-miR-5623-3p	2.63436	0.568427	NOT
mmu-miR-5623-5p	2.64844	0.500019	NOT
mmu-miR-5624-3p	1.6187	0.402725	NOT
mmu-miR-5624-5p	-0.0289276	1	NOT
mmu-miR-5625-3p	1.8959	1	NOT
mmu-miR-5626-3p	1.89744	1	NOT
mmu-miR-5626-5p	1.85796	1	NOT
mmu-miR-5627-3p	-1.93184	1	NOT
mmu-miR-5627-5p	1.20035	0.709165	NOT
mmu-miR-5709-3p	-0.357059	0.675689	NOT
mmu-miR-5709-5p	0.459231	0.111669	NOT
mmu-miR-574-3p	0.22006	0.113711	NOT
mmu-miR-574-5p	-0.279868	0.023076	NOT
mmu-miR-582-3p	0.380072	0.00238378	NOT
mmu-miR-582-5p	-0.0820267	0.590675	NOT
mmu-miR-590-3p	1.85774	1	NOT
mmu-miR-592-5p	-0.861016	0.0685717	NOT
mmu-miR-598-3p	-0.00472936	1	NOT
mmu-miR-615-3p	-0.339043	0.518291	NOT
mmu-miR-615-5p	-1.87043	1	NOT
mmu-miR-6238	-0.342591	1	NOT
mmu-miR-6239	0.217687	0.853046	NOT
mmu-miR-6380	-0.910345	1	NOT
mmu-miR-6392-5p	1.64297	0.408141	NOT
mmu-miR-6395	0.255604	0.395411	NOT
mmu-miR-6399	-0.441795	1	NOT
mmu-miR-6402	2.64844	0.500019	NOT
mmu-miR-6412	0.0983099	0.832763	NOT
mmu-miR-6418-3p	-0.0671682	0.919454	NOT
mmu-miR-6481	3.50968	0.168067	NOT
mmu-miR-6516-3p	-0.599214	0.439287	NOT
mmu-miR-6516-5p	-0.374319	0.24347	NOT
mmu-miR-652-3p	-0.239888	0.0319147	NOT
mmu-miR-652-5p	0.112267	0.620124	NOT
mmu-miR-653-3p	2.38041	0.117055	NOT
mmu-miR-653-5p	2.34604	1e-06	UP
mmu-miR-6537-3p	-2.59158	0.568427	NOT
mmu-miR-6538	0.181721	0.564154	NOT
mmu-miR-6539	-1.29576	0.0875787	NOT
mmu-miR-654-3p	0	1	NOT
mmu-miR-6540-3p	-0.19866	0.662148	NOT
mmu-miR-6540-5p	0.263002	0.2326	NOT
mmu-miR-6546-3p	0	1	NOT
mmu-miR-6546-5p	0.089256	1	NOT
mmu-miR-664-3p	0.16	0.262312	NOT
mmu-miR-664-5p	-0.108961	0.603178	NOT
mmu-miR-665-3p	-0.312507	0.378569	NOT
mmu-miR-665-5p	-1.33819	0.65051	NOT
mmu-miR-666-3p	-1.13304	0.284899	NOT
mmu-miR-666-5p	-0.434393	0.141126	NOT
mmu-miR-667-3p	-0.763815	0.00479922	NOT
mmu-miR-667-5p	-0.747746	0.116825	NOT
mmu-miR-668-3p	-0.000949953	1	NOT
mmu-miR-668-5p	-0.848039	1	NOT
mmu-miR-669a-3-3p	0.204094	0.89663	NOT
mmu-miR-669a-3p	0.516601	0.000153254	NOT
mmu-miR-669a-5p	0.578353	0.000824086	NOT
mmu-miR-669b-3p	0.275699	0.68575	NOT
mmu-miR-669b-5p	0.745738	0.00031238	NOT
mmu-miR-669c-3p	0.324713	1	NOT
mmu-miR-669c-5p	0.354335	0.0154906	NOT
mmu-miR-669d-2-3p	-3.1826	0.28025	NOT
mmu-miR-669d-3p	-3.18264	0.27972	NOT
mmu-miR-669d-5p	0.159431	0.450293	NOT
mmu-miR-669e-3p	0.0499554	1	NOT
mmu-miR-669e-5p	0.255139	0.319582	NOT
mmu-miR-669f-3p	0.658052	0.00486212	NOT
mmu-miR-669f-5p	0.227064	0.452305	NOT
mmu-miR-669h-3p	-1.87127	1	NOT
mmu-miR-669h-5p	0.499462	0.281824	NOT
mmu-miR-669k-5p	1.26741	0.625029	NOT
mmu-miR-669l-3p	-0.822484	0.734169	NOT
mmu-miR-669l-5p	0.250402	0.285686	NOT
mmu-miR-669n	1.85396	1	NOT
mmu-miR-669o-3p	0.516605	0.000155076	NOT
mmu-miR-669o-5p	0.490938	0.0230286	NOT
mmu-miR-669p-3p	0.977702	0.00134216	NOT
mmu-miR-669p-5p	0.578352	0.000822393	NOT
mmu-miR-670-3p	0	1	NOT
mmu-miR-670-5p	-0.0171468	1	NOT
mmu-miR-671-3p	0.312753	0.0385876	NOT
mmu-miR-671-5p	0.0264435	0.8676	NOT
mmu-miR-6715-5p	0.795267	0.287748	NOT
mmu-miR-672-3p	0.202454	0.441348	NOT
mmu-miR-672-5p	-0.264615	0.0413543	NOT
mmu-miR-673-3p	0.136762	0.820189	NOT
mmu-miR-673-5p	0.106493	0.738677	NOT
mmu-miR-674-3p	0.0502497	0.682751	NOT
mmu-miR-674-5p	-0.117136	0.359334	NOT
mmu-miR-675-3p	1.15513	0.550509	NOT
mmu-miR-675-5p	0	1	NOT
mmu-miR-676-3p	-0.337862	0.00646091	NOT
mmu-miR-676-5p	-0.26539	0.0904806	NOT
mmu-miR-677-3p	2.63436	0.568427	NOT
mmu-miR-677-5p	-0.906281	1.71699e-06	NOT
mmu-miR-679-3p	0.185018	0.868103	NOT
mmu-miR-679-5p	-0.711759	0.0134535	NOT
mmu-miR-688	-0.0477015	1	NOT
mmu-miR-6896-5p	-0.0715486	1	NOT
mmu-miR-6897-3p	0	1	NOT
mmu-miR-6897-5p	-1.45182	0.303645	NOT
mmu-miR-6898-3p	0	1	NOT
mmu-miR-6898-5p	1.8575	1	NOT
mmu-miR-6899-3p	-0.424204	0.129654	NOT
mmu-miR-6899-5p	-0.752597	1	NOT
mmu-miR-690	-0.0563303	0.944618	NOT
mmu-miR-6900-3p	-0.0479337	1	NOT
mmu-miR-6900-5p	-0.774673	0.647084	NOT
mmu-miR-6901-3p	-0.0469665	0.935631	NOT
mmu-miR-6901-5p	0.357434	0.53524	NOT
mmu-miR-6902-5p	3.84341	0.0785924	NOT
mmu-miR-6903-3p	-1.20272	0.176686	NOT
mmu-miR-6903-5p	-3.51965	0.158464	NOT
mmu-miR-6904-5p	-0.0395603	1	NOT
mmu-miR-6906-3p	0	1	NOT
mmu-miR-6906-5p	-0.815572	1	NOT
mmu-miR-6907-3p	0	1	NOT
mmu-miR-6908-3p	0	1	NOT
mmu-miR-6908-5p	-1.90156	1	NOT
mmu-miR-6909-3p	0	1	NOT
mmu-miR-6909-5p	-1.19096	0.394045	NOT
mmu-miR-6910-3p	-0.0171688	1	NOT
mmu-miR-6911-3p	-0.0645546	0.921957	NOT
mmu-miR-6911-5p	-0.813837	1	NOT
mmu-miR-6912-3p	0	1	NOT
mmu-miR-6912-5p	-0.815957	1	NOT
mmu-miR-6913-3p	-2.02655	0.324496	NOT
mmu-miR-6913-5p	-1.90159	1	NOT
mmu-miR-6914-3p	-0.0326018	1	NOT
mmu-miR-6914-5p	0	1	NOT
mmu-miR-6915-3p	-1.93244	1	NOT
mmu-miR-6915-5p	-0.847731	1	NOT
mmu-miR-6916-3p	3.82528	0.0625242	NOT
mmu-miR-6916-5p	-0.837375	0.749548	NOT
mmu-miR-6917-3p	3.53617	0.148088	NOT
mmu-miR-6917-5p	2.65008	0.502451	NOT
mmu-miR-6918-5p	-2.71187	0.568427	NOT
mmu-miR-6919-3p	1.85752	1	NOT
mmu-miR-6919-5p	0.798175	0.495225	NOT
mmu-miR-6920-5p	-0.949637	0.522202	NOT
mmu-miR-6921-3p	-0.0172719	1	NOT
mmu-miR-6921-5p	-1.90106	1	NOT
mmu-miR-6922-3p	0.347466	1	NOT
mmu-miR-6922-5p	-0.527947	1	NOT
mmu-miR-6925-3p	0	1	NOT
mmu-miR-6925-5p	-0.55776	0.784455	NOT
mmu-miR-6926-3p	-2.67768	0.500019	NOT
mmu-miR-6926-5p	-2.59158	0.568427	NOT
mmu-miR-6927-3p	-2.71187	0.568427	NOT
mmu-miR-6928-3p	-1.34517	0.65147	NOT
mmu-miR-6928-5p	2.64844	0.500019	NOT
mmu-miR-6929-3p	0.901314	0.336173	NOT
mmu-miR-6929-5p	0.765771	1	NOT
mmu-miR-693-3p	-0.0292216	1	NOT
mmu-miR-6932-3p	1.42795	0.183016	NOT
mmu-miR-6932-5p	-0.248852	1	NOT
mmu-miR-6933-3p	1.29766	0.64807	NOT
mmu-miR-6933-5p	0.188324	0.775928	NOT
mmu-miR-6934-5p	-1.00556	0.358819	NOT
mmu-miR-6935-3p	2.7242	0.568427	NOT
mmu-miR-6935-5p	2.7242	0.568427	NOT
mmu-miR-6936-3p	1.85752	1	NOT
mmu-miR-6937-3p	-0.00914319	1	NOT
mmu-miR-6937-5p	-0.437731	0.806218	NOT
mmu-miR-6938-3p	0.0600547	1	NOT
mmu-miR-6939-3p	0.648992	0.736759	NOT
mmu-miR-694	0.0676457	1	NOT
mmu-miR-6940-3p	-0.0379775	1	NOT
mmu-miR-6941-5p	3.25096	0.352641	NOT
mmu-miR-6942-3p	-1.93111	1	NOT
mmu-miR-6942-5p	-3.21904	0.277601	NOT
mmu-miR-6943-3p	-0.810671	1	NOT
mmu-miR-6943-5p	2.64971	0.501882	NOT
mmu-miR-6944-3p	0.190207	0.665503	NOT
mmu-miR-6945-3p	-0.807498	0.109703	NOT
mmu-miR-6946-3p	0.149896	1	NOT
mmu-miR-6946-5p	-4.3206	0.0187727	DOWN
mmu-miR-6947-5p	-1.01018	0.355878	NOT
mmu-miR-6948-3p	-0.315454	0.652803	NOT
mmu-miR-6948-5p	0.0285967	1	NOT
mmu-miR-6950-3p	-0.234264	0.8057	NOT
mmu-miR-6950-5p	-2.67768	0.500019	NOT
mmu-miR-6951-5p	-0.933154	0.160204	NOT
mmu-miR-6952-3p	0.539862	0.298149	NOT
mmu-miR-6952-5p	-0.462067	1	NOT
mmu-miR-6953-3p	1.85325	1	NOT
mmu-miR-6954-3p	-0.024751	1	NOT
mmu-miR-6954-5p	0	1	NOT
mmu-miR-6955-3p	-0.627641	0.769401	NOT
mmu-miR-6955-5p	0.145156	0.865155	NOT
mmu-miR-6956-3p	-1.87219	1	NOT
mmu-miR-6957-3p	0.619444	0.677392	NOT
mmu-miR-6957-5p	0.794283	1	NOT
mmu-miR-6958-3p	0.517986	0.624944	NOT
mmu-miR-6959-5p	-0.357903	1	NOT
mmu-miR-6960-5p	-0.438635	0.805054	NOT
mmu-miR-6961-3p	0	1	NOT
mmu-miR-6961-5p	-0.015428	1	NOT
mmu-miR-6962-3p	-0.392747	1	NOT
mmu-miR-6962-5p	-0.815562	1	NOT
mmu-miR-6963-3p	0.488554	1	NOT
mmu-miR-6963-5p	1.89728	1	NOT
mmu-miR-6964-3p	-0.649761	0.792799	NOT
mmu-miR-6964-5p	0.760655	1	NOT
mmu-miR-6965-3p	-2.6777	0.500019	NOT
mmu-miR-6966-3p	-0.404135	0.647175	NOT
mmu-miR-6966-5p	1.89711	1	NOT
mmu-miR-6967-3p	-0.837804	0.441038	NOT
mmu-miR-6967-5p	-0.705615	0.755538	NOT
mmu-miR-6968-3p	1.26986	0.640224	NOT
mmu-miR-6968-5p	-1.31774	0.635022	NOT
mmu-miR-6970-3p	-0.0238086	1	NOT
mmu-miR-6970-5p	1.27375	0.637207	NOT
mmu-miR-6971-3p	-0.32451	1	NOT
mmu-miR-6972-3p	-1.8734	1	NOT
mmu-miR-6973a-3p	-1.87524	1	NOT
mmu-miR-6973b-3p	0	1	NOT
mmu-miR-6975-3p	-0.318629	0.834501	NOT
mmu-miR-6976-3p	-1.87674	1	NOT
mmu-miR-6976-5p	0.321943	1	NOT
mmu-miR-6977-3p	1.09197	0.126292	NOT
mmu-miR-6977-5p	0	1	NOT
mmu-miR-6978-3p	1.09743	0.35381	NOT
mmu-miR-6978-5p	1.85731	1	NOT
mmu-miR-6979-3p	0	1	NOT
mmu-miR-698-3p	-3.17562	0.265743	NOT
mmu-miR-6980-3p	0.87095	0.534161	NOT
mmu-miR-6980-5p	2.18846	0.137553	NOT
mmu-miR-6981-3p	1.89549	1	NOT
mmu-miR-6981-5p	1.89398	1	NOT
mmu-miR-6982-3p	0	1	NOT
mmu-miR-6983-3p	-0.405664	1	NOT
mmu-miR-6984-3p	0.72584	0.566374	NOT
mmu-miR-6984-5p	0.335752	1	NOT
mmu-miR-6985-3p	0.339626	1	NOT
mmu-miR-6985-5p	3.16091	0.270547	NOT
mmu-miR-6986-5p	0.574823	0.325701	NOT
mmu-miR-6987-3p	-0.0461401	1	NOT
mmu-miR-6987-5p	1.89378	1	NOT
mmu-miR-6988-3p	-0.547683	0.370538	NOT
mmu-miR-6988-5p	3.53554	0.165252	NOT
mmu-miR-6989-3p	-0.250615	0.558775	NOT
mmu-miR-6989-5p	-2.71187	0.568427	NOT
mmu-miR-6990-5p	2.6495	0.501562	NOT
mmu-miR-6991-3p	3.49746	0.164748	NOT
mmu-miR-6991-5p	0	1	NOT
mmu-miR-6992-3p	1.89365	1	NOT
mmu-miR-6992-5p	1.85728	1	NOT
mmu-miR-6993-5p	-0.00916481	1	NOT
mmu-miR-6994-3p	-0.374868	0.358875	NOT
mmu-miR-6994-5p	0.757401	1	NOT
mmu-miR-6995-3p	-0.3378	1	NOT
mmu-miR-6995-5p	-1.90096	1	NOT
mmu-miR-6996-3p	0.31613	1	NOT
mmu-miR-6996-5p	-0.0292033	1	NOT
mmu-miR-6997-3p	-0.466728	0.790474	NOT
mmu-miR-6997-5p	-0.22336	1	NOT
mmu-miR-6998-3p	-0.0329615	1	NOT
mmu-miR-6998-5p	-1.90163	1	NOT
mmu-miR-6999-3p	-1.87674	1	NOT
mmu-miR-700-3p	0.0669785	0.639966	NOT
mmu-miR-700-5p	-0.273256	0.0534632	NOT
mmu-miR-7001-3p	0	1	NOT
mmu-miR-7002-5p	-1.93078	1	NOT
mmu-miR-7003-5p	-0.0632735	1	NOT
mmu-miR-7004-5p	-3.17451	0.2616	NOT
mmu-miR-7005-3p	-2.59158	0.568427	NOT
mmu-miR-7005-5p	1.85355	1	NOT
mmu-miR-7006-3p	1.85387	1	NOT
mmu-miR-7007-3p	-0.0462239	1	NOT
mmu-miR-7007-5p	-0.0456628	1	NOT
mmu-miR-7008-3p	-0.2075	1	NOT
mmu-miR-7008-5p	1.26985	0.640151	NOT
mmu-miR-7009-3p	-3.20685	0.271919	NOT
mmu-miR-7009-5p	1.60999	0.129596	NOT
mmu-miR-701-3p	-0.411658	0.336396	NOT
mmu-miR-701-5p	-0.403187	0.0547096	NOT
mmu-miR-7010-3p	-0.873904	0.368627	NOT
mmu-miR-7010-5p	0.127864	0.846371	NOT
mmu-miR-7011-3p	0	1	NOT
mmu-miR-7012-3p	1.85318	1	NOT
mmu-miR-7012-5p	-3.21973	0.278298	NOT
mmu-miR-7013-3p	1.93809	0.218804	NOT
mmu-miR-7013-5p	0.52576	0.61493	NOT
mmu-miR-7014-5p	-2.67768	0.500019	NOT
mmu-miR-7015-3p	0.189066	0.880203	NOT
mmu-miR-7015-5p	-0.817718	1	NOT
mmu-miR-7016-3p	-0.015446	1	NOT
mmu-miR-7016-5p	3.14293	0.267007	NOT
mmu-miR-7017-3p	-0.817659	1	NOT
mmu-miR-7017-5p	-1.14552	0.319019	NOT
mmu-miR-7018-3p	1.42843	0.330857	NOT
mmu-miR-7019-3p	0.769247	0.252248	NOT
mmu-miR-7019-5p	-0.0508859	1	NOT
mmu-miR-702-3p	-0.212735	0.78131	NOT
mmu-miR-702-5p	-0.533266	1	NOT
mmu-miR-7020-5p	-1.87674	1	NOT
mmu-miR-7021-3p	-0.815959	1	NOT
mmu-miR-7021-5p	0.0784618	0.914307	NOT
mmu-miR-7022-3p	0	1	NOT
mmu-miR-7022-5p	-3.20704	0.272152	NOT
mmu-miR-7024-3p	0	1	NOT
mmu-miR-7024-5p	0.850479	0.704052	NOT
mmu-miR-7025-3p	-0.1111	0.856782	NOT
mmu-miR-7025-5p	3.15233	0.268808	NOT
mmu-miR-7026-3p	1.15955	0.709935	NOT
mmu-miR-7026-5p	-0.307513	0.729459	NOT
mmu-miR-7027-3p	3.49744	0.164773	NOT
mmu-miR-7027-5p	0	1	NOT
mmu-miR-7028-5p	0	1	NOT
mmu-miR-7029-3p	-0.052054	1	NOT
mmu-miR-7030-3p	-0.0394198	1	NOT
mmu-miR-7030-5p	-1.87674	1	NOT
mmu-miR-7031-3p	0.761535	1	NOT
mmu-miR-7031-5p	1.7873	0.12881	NOT
mmu-miR-7032-3p	-1.16705	0.5446	NOT
mmu-miR-7033-5p	2.0126	0.0229701	UP
mmu-miR-7034-3p	-3.17453	0.261566	NOT
mmu-miR-7036a-3p	3.14279	0.267226	NOT
mmu-miR-7036a-5p	-3.21947	0.278039	NOT
mmu-miR-7036b-3p	-1.90155	1	NOT
mmu-miR-7036b-5p	-0.178941	1	NOT
mmu-miR-7037-5p	-0.523725	1	NOT
mmu-miR-7038-3p	-1.87674	1	NOT
mmu-miR-7038-5p	0.492239	1	NOT
mmu-miR-7039-5p	0	1	NOT
mmu-miR-704	0.0612829	0.942267	NOT
mmu-miR-7040-3p	0	1	NOT
mmu-miR-7040-5p	-2.75956	0.568427	NOT
mmu-miR-7041-5p	-2.67768	0.500019	NOT
mmu-miR-7042-3p	-0.313152	1	NOT
mmu-miR-7042-5p	0.69948	1	NOT
mmu-miR-7043-3p	0.524253	0.0362261	NOT
mmu-miR-7043-5p	1.14355	0.486889	NOT
mmu-miR-7044-3p	-0.524835	0.644699	NOT
mmu-miR-7044-5p	-3.84283	0.0865499	NOT
mmu-miR-7045-3p	0	1	NOT
mmu-miR-7046-3p	-1.68638	0.40699	NOT
mmu-miR-7046-5p	-1.9307	1	NOT
mmu-miR-7047-3p	-1.87674	1	NOT
mmu-miR-7048-3p	-0.533365	1	NOT
mmu-miR-7049-5p	0.372114	0.553861	NOT
mmu-miR-705	0	1	NOT
mmu-miR-7051-5p	0.767106	1	NOT
mmu-miR-7052-3p	0.475718	1	NOT
mmu-miR-7052-5p	0.433325	0.791306	NOT
mmu-miR-7054-3p	-0.0626233	1	NOT
mmu-miR-7054-5p	-1.6996	0.378625	NOT
mmu-miR-7056-5p	1.89348	1	NOT
mmu-miR-7057-3p	0.670651	0.465905	NOT
mmu-miR-7057-5p	-2.75956	0.568427	NOT
mmu-miR-7058-5p	-2.67768	0.500019	NOT
mmu-miR-7059-5p	0.226639	0.751282	NOT
mmu-miR-706	-0.752785	0.75912	NOT
mmu-miR-7061-3p	-0.0173603	1	NOT
mmu-miR-7061-5p	-0.531037	0.307183	NOT
mmu-miR-7062-5p	1.15015	0.461433	NOT
mmu-miR-7063-3p	3.15229	0.269266	NOT
mmu-miR-7063-5p	-0.549425	0.839405	NOT
mmu-miR-7064-3p	-0.0503688	1	NOT
mmu-miR-7064-5p	-1.92951	1	NOT
mmu-miR-7065-3p	0.00313191	1	NOT
mmu-miR-7065-5p	-0.0274426	1	NOT
mmu-miR-7067-3p	-1.66373	0.420922	NOT
mmu-miR-7068-3p	1.42131	0.356025	NOT
mmu-miR-7068-5p	-2.59158	0.568427	NOT
mmu-miR-7069-3p	1.89329	1	NOT
mmu-miR-7069-5p	-0.70825	0.748681	NOT
mmu-miR-7070-3p	1.89359	1	NOT
mmu-miR-7070-5p	0	1	NOT
mmu-miR-7071-5p	1.12932	0.529351	NOT
mmu-miR-7073-5p	-1.63409	0.000141561	DOWN
mmu-miR-7074-3p	0.659322	0.480857	NOT
mmu-miR-7074-5p	-1.87945	1	NOT
mmu-miR-7075-3p	-1.648	0.264699	NOT
mmu-miR-7077-3p	1.85258	1	NOT
mmu-miR-7079-3p	-2.13079	0.000643068	DOWN
mmu-miR-708-3p	-0.569111	5.88145e-05	NOT
mmu-miR-708-5p	-0.733385	1e-06	NOT
mmu-miR-7081-3p	3.13621	0.352641	NOT
mmu-miR-7082-3p	-1.92774	1	NOT
mmu-miR-7083-3p	0.4863	1	NOT
mmu-miR-7083-5p	-0.183506	0.521234	NOT
mmu-miR-7084-3p	-1.92679	1	NOT
mmu-miR-7084-5p	-1.24303	0.181901	NOT
mmu-miR-7085-3p	-1.67048	0.4209	NOT
mmu-miR-7086-3p	0	1	NOT
mmu-miR-7087-5p	-1.73234	0.411221	NOT
mmu-miR-7089-3p	0	1	NOT
mmu-miR-7089-5p	1.2821	0.649068	NOT
mmu-miR-709	-0.0217816	1	NOT
mmu-miR-7090-3p	0.488571	1	NOT
mmu-miR-7090-5p	-1.66369	0.420986	NOT
mmu-miR-7091-3p	-0.239628	1	NOT
mmu-miR-7091-5p	-1.16758	0.00901456	DOWN
mmu-miR-7092-3p	-0.430356	0.735854	NOT
mmu-miR-7092-5p	-2.12423	0.000732358	DOWN
mmu-miR-7093-3p	-0.594906	0.551355	NOT
mmu-miR-7094-3p	1.89631	1	NOT
mmu-miR-7094b-2-5p	1.85725	1	NOT
mmu-miR-7115-5p	0.34565	1	NOT
mmu-miR-7116-3p	1.39181	0.333838	NOT
mmu-miR-7116-5p	-1.87816	1	NOT
mmu-miR-7117-5p	-1.90104	1	NOT
mmu-miR-7118-3p	0.825985	0.397996	NOT
mmu-miR-7119-5p	0	1	NOT
mmu-miR-712-3p	-0.891576	1	NOT
mmu-miR-712-5p	-0.23251	0.860465	NOT
mmu-miR-719	0	1	NOT
mmu-miR-7211-3p	0.853785	0.69276	NOT
mmu-miR-7211-5p	-2.75956	0.568427	NOT
mmu-miR-7212-5p	-0.89935	0.72118	NOT
mmu-miR-7213-3p	-1.33352	0.64592	NOT
mmu-miR-7213-5p	-0.538478	0.380984	NOT
mmu-miR-7219-3p	0.185746	0.700007	NOT
mmu-miR-7219-5p	-1.92694	1	NOT
mmu-miR-7224-3p	1.16527	0.1652	NOT
mmu-miR-7224-5p	2.6491	0.500961	NOT
mmu-miR-7226-3p	-0.70223	0.022922	NOT
mmu-miR-7227-3p	-0.867819	1	NOT
mmu-miR-7231-5p	-1.92767	1	NOT
mmu-miR-7235-3p	-0.242887	1	NOT
mmu-miR-7236-3p	1.28309	0.245081	NOT
mmu-miR-7237-3p	0.644651	0.741447	NOT
mmu-miR-7237-5p	1.89819	1	NOT
mmu-miR-7240-3p	-1.92753	1	NOT
mmu-miR-7240-5p	-2.6337	0.0446379	DOWN
mmu-miR-741-3p	0.339628	1	NOT
mmu-miR-743a-5p	2.7242	0.568427	NOT
mmu-miR-743b-3p	1.90012	1	NOT
mmu-miR-743b-5p	0	1	NOT
mmu-miR-744-3p	0.501829	0.0378281	NOT
mmu-miR-744-5p	-0.175775	0.116755	NOT
mmu-miR-758-3p	-0.0335096	1	NOT
mmu-miR-760-3p	0.0218097	0.966929	NOT
mmu-miR-760-5p	-1.90059	1	NOT
mmu-miR-764-3p	0.258115	1	NOT
mmu-miR-764-5p	-0.0341329	1	NOT
mmu-miR-7646-5p	-2.67767	0.500019	NOT
mmu-miR-7647-3p	2.64844	0.500019	NOT
mmu-miR-7647-5p	-0.768305	1	NOT
mmu-miR-7648-3p	-1.90069	1	NOT
mmu-miR-7648-5p	-1.92659	1	NOT
mmu-miR-7649-3p	-0.0151223	1	NOT
mmu-miR-7649-5p	-0.810596	1	NOT
mmu-miR-7650-5p	-4.33594	0.0266663	DOWN
mmu-miR-7651-5p	1.08233	0.33035	NOT
mmu-miR-7652-3p	0.891749	0.520555	NOT
mmu-miR-7652-5p	-1.87635	1	NOT
mmu-miR-7653-3p	-1.6142	0.256387	NOT
mmu-miR-7653-5p	-1.13968	0.284908	NOT
mmu-miR-7654-3p	0	1	NOT
mmu-miR-7654-5p	1.64913	0.424612	NOT
mmu-miR-7655-3p	-0.0495676	1	NOT
mmu-miR-7655-5p	2.59269	0.059735	NOT
mmu-miR-7656-3p	-1.92625	1	NOT
mmu-miR-7656-5p	1.46408	0.373645	NOT
mmu-miR-7657-5p	1.85266	1	NOT
mmu-miR-7658-3p	-0.55088	1	NOT
mmu-miR-7658-5p	1.09288	0.388018	NOT
mmu-miR-7659-5p	-1.09727	0.0660008	NOT
mmu-miR-7660-3p	2.64844	0.500019	NOT
mmu-miR-7661-3p	-0.474233	0.671909	NOT
mmu-miR-7661-5p	0	1	NOT
mmu-miR-7662-3p	-0.428613	0.800091	NOT
mmu-miR-7662-5p	3.15461	0.250029	NOT
mmu-miR-7663-3p	-0.073976	1	NOT
mmu-miR-7664-3p	2.19287	0.139665	NOT
mmu-miR-7664-5p	-1.87405	1	NOT
mmu-miR-7665-5p	-2.71187	0.568427	NOT
mmu-miR-7666-3p	1.90015	1	NOT
mmu-miR-7667-3p	-0.00850714	1	NOT
mmu-miR-7667-5p	1.57244	0.0182363	UP
mmu-miR-7668-3p	-2.75956	0.568427	NOT
mmu-miR-7668-5p	-0.514899	0.656956	NOT
mmu-miR-7669-3p	-0.029196	1	NOT
mmu-miR-7669-5p	-0.277457	0.745676	NOT
mmu-miR-7670-3p	-0.084321	1	NOT
mmu-miR-7671-3p	1.85732	1	NOT
mmu-miR-7671-5p	-0.331841	1	NOT
mmu-miR-7672-3p	-2.67768	0.500019	NOT
mmu-miR-7673-3p	1.85739	1	NOT
mmu-miR-7673-5p	1.76392	0.17683	NOT
mmu-miR-7674-3p	-0.813968	1	NOT
mmu-miR-7674-5p	2.64891	0.501545	NOT
mmu-miR-7675-3p	-0.415252	0.605146	NOT
mmu-miR-7675-5p	0	1	NOT
mmu-miR-7676-3p	0.0632221	1	NOT
mmu-miR-7676-5p	1.85746	1	NOT
mmu-miR-7677-3p	0.238488	1	NOT
mmu-miR-7678-3p	-1.70004	0.37842	NOT
mmu-miR-7679-3p	0.797171	0.735149	NOT
mmu-miR-7679-5p	0.878771	0.533889	NOT
mmu-miR-7680-3p	-0.107886	1	NOT
mmu-miR-7680-5p	-1.32334	0.64591	NOT
mmu-miR-7682-3p	1.22827	0.708995	NOT
mmu-miR-7683-5p	0.710524	1	NOT
mmu-miR-7685-3p	0.761535	1	NOT
mmu-miR-7685-5p	-0.0558178	1	NOT
mmu-miR-7687-3p	-1.46845	0.377298	NOT
mmu-miR-7687-5p	-0.0274064	1	NOT
mmu-miR-7688-5p	-1.2717	1e-06	DOWN
mmu-miR-7689-3p	0.0034187	1	NOT
mmu-miR-770-3p	-0.662088	0.162545	NOT
mmu-miR-770-5p	-0.829297	0.446975	NOT
mmu-miR-7a-1-3p	-0.000123887	1	NOT
mmu-miR-7a-2-3p	0	1	NOT
mmu-miR-7a-5p	-0.140704	0.288482	NOT
mmu-miR-7b-3p	-1.8747	1	NOT
mmu-miR-7b-5p	-1.0154	1e-06	DOWN
mmu-miR-802-3p	0	1	NOT
mmu-miR-802-5p	-0.794467	0.57825	NOT
mmu-miR-8091	0	1	NOT
mmu-miR-8092	1.85273	1	NOT
mmu-miR-8094	0.874703	0.535636	NOT
mmu-miR-8096	1.90205	1	NOT
mmu-miR-8097	0.200803	0.697223	NOT
mmu-miR-8100	-0.867871	1	NOT
mmu-miR-8101	-1.92539	1	NOT
mmu-miR-8103	1.02975	0.00414643	UP
mmu-miR-8104	3.09561	0.352641	NOT
mmu-miR-8105	-1.70001	0.378358	NOT
mmu-miR-8106	-0.221555	1	NOT
mmu-miR-8107	3.52856	0.125029	NOT
mmu-miR-8111	-1.01073	0.261348	NOT
mmu-miR-8112	0.355984	0.106821	NOT
mmu-miR-8114	-0.403712	0.0984607	NOT
mmu-miR-8116	-1.20187	0.465991	NOT
mmu-miR-8117	-1.90009	1	NOT
mmu-miR-8118	-0.629379	0.295337	NOT
mmu-miR-8120	0.271386	0.464989	NOT
mmu-miR-871-3p	3.25096	0.352641	NOT
mmu-miR-872-3p	0.0613933	0.629911	NOT
mmu-miR-872-5p	-0.0348131	0.760808	NOT
mmu-miR-873a-3p	-0.0274074	1	NOT
mmu-miR-873a-5p	-1.19211	0.295883	NOT
mmu-miR-874-3p	-0.568815	0.000472743	NOT
mmu-miR-874-5p	-1.09166	0.161556	NOT
mmu-miR-875-5p	0.0369031	1	NOT
mmu-miR-877-3p	0.352629	0.343008	NOT
mmu-miR-877-5p	0.375629	0.106159	NOT
mmu-miR-878-3p	0	1	NOT
mmu-miR-878-5p	2.7242	0.568427	NOT
mmu-miR-879-3p	-0.473507	0.158169	NOT
mmu-miR-879-5p	0.105171	0.623112	NOT
mmu-miR-880-3p	0.760685	1	NOT
mmu-miR-881-3p	4.06267	0.000682325	UP
mmu-miR-883a-3p	1.90182	1	NOT
mmu-miR-9-3p	0.212806	0.39913	NOT
mmu-miR-9-5p	0.271657	0.228953	NOT
mmu-miR-92a-1-5p	-0.589654	0.0185298	NOT
mmu-miR-92a-3p	-0.347323	0.00253737	NOT
mmu-miR-92b-3p	-0.241497	0.0661175	NOT
mmu-miR-92b-5p	0.167633	0.407624	NOT
mmu-miR-93-3p	-0.00911388	0.955727	NOT
mmu-miR-93-5p	-0.15255	0.249983	NOT
mmu-miR-935	1.68699	0.0394574	UP
mmu-miR-96-3p	-0.457682	0.372767	NOT
mmu-miR-96-5p	-0.255044	0.0290292	NOT
mmu-miR-9769-3p	-0.510639	0.277049	NOT
mmu-miR-98-3p	0.00979772	1	NOT
mmu-miR-98-5p	-0.161354	0.159033	NOT
mmu-miR-99a-3p	0.337913	0.0387374	NOT
mmu-miR-99a-5p	0.177804	0.103075	NOT
mmu-miR-99b-3p	0.0396501	0.747179	NOT
mmu-miR-99b-5p	0.215396	0.0881011	NOT

## Sheet: MNC VS BPD
	logFC	P.Value	change
mmu-let-7a-1-3p	0.3028	0.00398254	NOT
mmu-let-7a-2-3p	0.0942184	0.85937	NOT
mmu-let-7a-5p	-0.103374	0.351847	NOT
mmu-let-7b-3p	0.458587	0.000556056	NOT
mmu-let-7b-5p	0.218935	0.0411518	NOT
mmu-let-7c-1-3p	0.289676	0.095078	NOT
mmu-let-7c-2-3p	0.303005	0.00395148	NOT
mmu-let-7c-5p	0.17575	0.106455	NOT
mmu-let-7d-3p	0.0478637	0.641905	NOT
mmu-let-7d-5p	-0.0571223	0.590512	NOT
mmu-let-7e-3p	0.429924	0.000815015	NOT
mmu-let-7e-5p	-0.0108103	0.918247	NOT
mmu-let-7f-1-3p	0.380749	0.00468982	NOT
mmu-let-7f-2-3p	0.0488207	0.714072	NOT
mmu-let-7f-5p	-0.163722	0.151747	NOT
mmu-let-7g-3p	0.418731	0.201649	NOT
mmu-let-7g-5p	-0.0465259	0.660018	NOT
mmu-let-7i-3p	0.131399	0.282925	NOT
mmu-let-7i-5p	0.272221	0.0197805	NOT
mmu-let-7j	-0.0631786	0.614747	NOT
mmu-let-7k	-0.133632	0.603451	NOT
mmu-miR-100-3p	0.140735	0.569831	NOT
mmu-miR-100-5p	0.406072	0.000182496	NOT
mmu-miR-101a-3p	-0.165121	0.120132	NOT
mmu-miR-101a-5p	0.0563407	0.916663	NOT
mmu-miR-101b-3p	0.0205226	0.847165	NOT
mmu-miR-101b-5p	-3.91656	0.0875587	NOT
mmu-miR-101c	-0.117143	0.360125	NOT
mmu-miR-103-1-5p	-1.11406	0.765931	NOT
mmu-miR-103-2-5p	-1.07993	0.00233092	DOWN
mmu-miR-103-3p	-0.127281	0.210672	NOT
mmu-miR-106a-5p	-0.0367556	0.810536	NOT
mmu-miR-106b-3p	0.0311885	0.784915	NOT
mmu-miR-106b-5p	-0.0117216	0.916337	NOT
mmu-miR-107-3p	0.106334	0.393794	NOT
mmu-miR-107-5p	-0.212825	0.802574	NOT
mmu-miR-10a-3p	0.00791621	0.944067	NOT
mmu-miR-10a-5p	-0.102096	0.356421	NOT
mmu-miR-10b-3p	-0.575322	0.0338503	NOT
mmu-miR-10b-5p	-0.440884	8.1052e-05	NOT
mmu-miR-1188-3p	1.80137	1	NOT
mmu-miR-1188-5p	-0.958576	1	NOT
mmu-miR-1190	2.57653	0.500806	NOT
mmu-miR-1191a	0.302782	0.0768707	NOT
mmu-miR-1191b-3p	3.09244	0.279578	NOT
mmu-miR-1191b-5p	0.164965	0.651845	NOT
mmu-miR-1193-3p	-1.00826	1e-06	DOWN
mmu-miR-1193-5p	-0.574273	0.425008	NOT
mmu-miR-1194	-0.0305043	1	NOT
mmu-miR-1195	0.165869	0.860892	NOT
mmu-miR-1197-3p	-0.363368	0.630811	NOT
mmu-miR-1198-3p	0.239579	0.603042	NOT
mmu-miR-1198-5p	0.206356	0.0691014	NOT
mmu-miR-1199-3p	1.32086	0.0631003	NOT
mmu-miR-1199-5p	1.60614	1e-06	UP
mmu-miR-12178-3p	0	1	NOT
mmu-miR-12180-3p	0	1	NOT
mmu-miR-12181-3p	0	1	NOT
mmu-miR-12182-3p	-0.725431	0.0155521	NOT
mmu-miR-12184-3p	0.152439	1	NOT
mmu-miR-12184-5p	0.490399	0.823963	NOT
mmu-miR-12185-3p	3.45385	0.213233	NOT
mmu-miR-12185-5p	0	1	NOT
mmu-miR-12186-3p	0	1	NOT
mmu-miR-12187-3p	-0.0231817	1	NOT
mmu-miR-12187-5p	-0.695174	1	NOT
mmu-miR-12189-3p	-2.56235	0.115426	NOT
mmu-miR-12191-3p	1.78433	1e-06	UP
mmu-miR-12192-5p	0	1	NOT
mmu-miR-12193-3p	-0.187714	1	NOT
mmu-miR-12193-5p	1.12235	0.625023	NOT
mmu-miR-12194-3p	-0.811196	0.0684732	NOT
mmu-miR-12195-3p	0.148542	1	NOT
mmu-miR-12197-3p	2.57651	0.500015	NOT
mmu-miR-12199-3p	0.90404	0.00136433	NOT
mmu-miR-122-3p	0.094657	0.893983	NOT
mmu-miR-122-5p	-0.917673	0.136722	NOT
mmu-miR-12201-3p	0.603808	1	NOT
mmu-miR-12201-5p	-0.494209	1	NOT
mmu-miR-12202-3p	0.12309	1	NOT
mmu-miR-12203-3p	2.60937	0.55624	NOT
mmu-miR-12205-3p	0.326956	0.60545	NOT
mmu-miR-12205-5p	-0.415268	0.587816	NOT
mmu-miR-12206-5p	1.08441	0.697741	NOT
mmu-miR-1224-5p	-0.549271	1	NOT
mmu-miR-1231-3p	-1.29325	0.284419	NOT
mmu-miR-1231-5p	1.03004	0.528264	NOT
mmu-miR-124-3p	0.35045	0.839181	NOT
mmu-miR-124-5p	-1.97532	1	NOT
mmu-miR-1247-3p	-0.20619	0.825602	NOT
mmu-miR-1247-5p	1.09025	0.0566277	NOT
mmu-miR-1249-3p	-0.158195	0.31068	NOT
mmu-miR-1249-5p	0.523471	0.442879	NOT
mmu-miR-124b-3p	0.624745	1	NOT
mmu-miR-1258-5p	1.12594	0.644117	NOT
mmu-miR-125a-3p	0.895865	1e-06	NOT
mmu-miR-125a-5p	0.00597861	0.957992	NOT
mmu-miR-125b-1-3p	0.497783	0.000104365	NOT
mmu-miR-125b-2-3p	0.264019	0.0143635	NOT
mmu-miR-125b-5p	0.319376	0.00344297	NOT
mmu-miR-1264-3p	0.586031	8.21027e-06	NOT
mmu-miR-1264-5p	0.711517	8.10326e-05	NOT
mmu-miR-126a-3p	0.223226	0.0372087	NOT
mmu-miR-126a-5p	-0.169829	0.137348	NOT
mmu-miR-126b-3p	0.326921	0.700422	NOT
mmu-miR-126b-5p	-0.749102	0.767657	NOT
mmu-miR-127-3p	-0.486038	3.07095e-06	NOT
mmu-miR-127-5p	-0.595666	9.18498e-06	NOT
mmu-miR-1271-3p	0.360635	0.784779	NOT
mmu-miR-1271-5p	2.54569	0.55624	NOT
mmu-miR-128-1-5p	-0.203444	0.77996	NOT
mmu-miR-128-2-5p	-1.92853	1	NOT
mmu-miR-128-3p	0.0174588	0.868553	NOT
mmu-miR-129-1-3p	0.407324	0.449772	NOT
mmu-miR-129-2-3p	1.06418	0.0299589	UP
mmu-miR-129-5p	1.43659	1e-06	UP
mmu-miR-1291	-0.283474	0.191216	NOT
mmu-miR-1298-3p	1.17869	3.83523e-05	UP
mmu-miR-1298-5p	1.2686	1e-06	UP
mmu-miR-129b-3p	-0.95866	1	NOT
mmu-miR-129b-5p	-2.16124	0.254831	NOT
mmu-miR-1306-3p	0.581676	0.0136806	NOT
mmu-miR-1306-5p	0.0653029	0.693827	NOT
mmu-miR-130a-3p	0.00640151	0.950676	NOT
mmu-miR-130a-5p	0.0792441	0.714267	NOT
mmu-miR-130b-3p	0.132598	0.52454	NOT
mmu-miR-130b-5p	0.563379	0.000355527	NOT
mmu-miR-132-3p	-0.223712	0.137131	NOT
mmu-miR-132-5p	-0.0613187	0.707139	NOT
mmu-miR-133a-3p	0.308022	0.110714	NOT
mmu-miR-133a-5p	0.11824	0.631731	NOT
mmu-miR-133b-3p	0.196143	0.395124	NOT
mmu-miR-133b-5p	-2.6824	0.55624	NOT
mmu-miR-134-3p	-1.24596	0.0166084	DOWN
mmu-miR-134-5p	-0.19282	0.12934	NOT
mmu-miR-135a-1-3p	-0.21814	1	NOT
mmu-miR-135a-2-3p	0	1	NOT
mmu-miR-135a-5p	0.737378	0.160406	NOT
mmu-miR-135b-3p	-0.553566	0.464205	NOT
mmu-miR-135b-5p	0.0125067	0.956254	NOT
mmu-miR-136-3p	-0.610529	1.32755e-06	NOT
mmu-miR-136-5p	-0.55039	1.77858e-05	NOT
mmu-miR-137-3p	-0.445171	0.494994	NOT
mmu-miR-137-5p	0	1	NOT
mmu-miR-138-1-3p	0.6934	0.690806	NOT
mmu-miR-138-2-3p	0.479986	0.554682	NOT
mmu-miR-138-5p	0.390386	0.0701649	NOT
mmu-miR-139-3p	-0.725883	0.00103596	NOT
mmu-miR-139-5p	0.0623465	0.599512	NOT
mmu-miR-140-3p	0.311611	0.00332639	NOT
mmu-miR-140-5p	0.187505	0.0606473	NOT
mmu-miR-141-3p	-0.0385744	0.716898	NOT
mmu-miR-141-5p	0.142569	0.397437	NOT
mmu-miR-142a-3p	0.57992	2.94838e-06	NOT
mmu-miR-142a-5p	0.465235	0.000464029	NOT
mmu-miR-142b	0.53152	0.417765	NOT
mmu-miR-143-3p	0.18341	0.0759331	NOT
mmu-miR-143-5p	0.0571114	0.569694	NOT
mmu-miR-144-3p	-0.198566	0.426914	NOT
mmu-miR-144-5p	-0.58019	0.00726343	NOT
mmu-miR-145a-3p	0.104791	0.347416	NOT
mmu-miR-145a-5p	-0.00381351	0.974372	NOT
mmu-miR-145b	0.325874	0.220312	NOT
mmu-miR-146a-3p	1.31296	8.08193e-05	UP
mmu-miR-146a-5p	0.79212	1e-06	NOT
mmu-miR-146b-3p	0.879374	5.16496e-06	NOT
mmu-miR-146b-5p	0.910167	1e-06	NOT
mmu-miR-147-3p	0.546289	0.0194981	NOT
mmu-miR-147-5p	-0.608591	0.0953334	NOT
mmu-miR-148a-3p	0.151984	0.16328	NOT
mmu-miR-148a-5p	0.157513	0.166718	NOT
mmu-miR-148b-3p	-0.0285973	0.831079	NOT
mmu-miR-148b-5p	0.298009	0.0106322	NOT
mmu-miR-149-5p	-0.0803191	0.484663	NOT
mmu-miR-150-3p	-0.108634	0.57085	NOT
mmu-miR-150-5p	0.0748951	0.558237	NOT
mmu-miR-151-3p	0.37214	0.000326068	NOT
mmu-miR-151-5p	-0.0297616	0.79613	NOT
mmu-miR-152-3p	0.0286386	0.780782	NOT
mmu-miR-152-5p	-0.107866	0.342375	NOT
mmu-miR-153-3p	-0.217423	0.0746863	NOT
mmu-miR-153-5p	-0.488517	0.0751613	NOT
mmu-miR-154-3p	-0.379145	0.204965	NOT
mmu-miR-154-5p	-0.419031	0.00809449	NOT
mmu-miR-155-3p	-0.686615	0.331066	NOT
mmu-miR-155-5p	-0.162298	0.162441	NOT
mmu-miR-15a-3p	-0.328987	0.0891113	NOT
mmu-miR-15a-5p	-0.151132	0.210545	NOT
mmu-miR-15b-3p	-0.0637093	0.598843	NOT
mmu-miR-15b-5p	-0.250523	0.03276	NOT
mmu-miR-16-1-3p	0.459379	5.87109e-05	NOT
mmu-miR-16-2-3p	0.200283	0.247698	NOT
mmu-miR-16-5p	-0.171212	0.100803	NOT
mmu-miR-1668	0.403519	0.0447794	NOT
mmu-miR-17-3p	-0.263347	0.0380015	NOT
mmu-miR-17-5p	-0.30932	0.00608552	NOT
mmu-miR-181a-1-3p	0.14263	0.209841	NOT
mmu-miR-181a-2-3p	0.475631	0.000175298	NOT
mmu-miR-181a-5p	-0.113003	0.260073	NOT
mmu-miR-181b-1-3p	0.232559	0.2322	NOT
mmu-miR-181b-2-3p	0.120951	0.865936	NOT
mmu-miR-181b-5p	0.412458	3.76776e-05	NOT
mmu-miR-181c-3p	0.386688	0.00378487	NOT
mmu-miR-181c-5p	-0.0590325	0.592465	NOT
mmu-miR-181d-3p	1.01957	0.0198544	UP
mmu-miR-181d-5p	0.337446	0.000953526	NOT
mmu-miR-182-3p	-0.780761	0.00165392	NOT
mmu-miR-182-5p	-0.259575	0.0109257	NOT
mmu-miR-183-3p	-0.254243	0.249935	NOT
mmu-miR-183-5p	-0.304463	0.00478382	NOT
mmu-miR-1839-3p	0.364504	0.00523502	NOT
mmu-miR-1839-5p	0.184135	0.0620666	NOT
mmu-miR-184-3p	0.978373	5.89146e-06	NOT
mmu-miR-1843a-3p	0.0576252	0.778264	NOT
mmu-miR-1843a-5p	0.0811498	0.434861	NOT
mmu-miR-1843b-3p	-0.141361	0.277843	NOT
mmu-miR-1843b-5p	0.078641	0.450208	NOT
mmu-miR-185-3p	0.229275	0.153618	NOT
mmu-miR-185-5p	0.0501594	0.636008	NOT
mmu-miR-186-3p	-0.381533	0.297591	NOT
mmu-miR-186-5p	0.107683	0.273464	NOT
mmu-miR-187-3p	0.169702	0.119496	NOT
mmu-miR-187-5p	0.221321	0.287637	NOT
mmu-miR-188-3p	0.573224	0.551649	NOT
mmu-miR-188-5p	0.299921	0.131498	NOT
mmu-miR-1895	-0.215948	1	NOT
mmu-miR-18a-3p	-0.0629529	0.717159	NOT
mmu-miR-18a-5p	-0.110842	0.385587	NOT
mmu-miR-18b-3p	0.183302	1	NOT
mmu-miR-18b-5p	0.525713	0.202566	NOT
mmu-miR-1902	0	1	NOT
mmu-miR-190a-3p	0.199056	0.762099	NOT
mmu-miR-190a-5p	0.145556	0.348229	NOT
mmu-miR-190b-3p	-0.387895	0.845004	NOT
mmu-miR-190b-5p	-0.094883	0.643665	NOT
mmu-miR-191-3p	0.337949	0.0639905	NOT
mmu-miR-191-5p	-0.0139665	0.896709	NOT
mmu-miR-1912-3p	1.19541	1.37184e-05	UP
mmu-miR-1912-5p	0.972561	5.71638e-06	NOT
mmu-miR-192-3p	-0.837274	0.261263	NOT
mmu-miR-192-5p	-0.338775	0.000727974	NOT
mmu-miR-1927	-0.298505	0.425206	NOT
mmu-miR-1929-3p	-3.30705	0.283037	NOT
mmu-miR-1929-5p	-0.0417699	1	NOT
mmu-miR-1930-3p	-1.51961	0.0703913	NOT
mmu-miR-1930-5p	-0.587193	0.089812	NOT
mmu-miR-1931	-0.203363	1	NOT
mmu-miR-1932	0.129817	1	NOT
mmu-miR-1933-3p	-0.935205	0.022503	NOT
mmu-miR-1933-5p	0.335712	1	NOT
mmu-miR-1934-3p	-0.450522	1	NOT
mmu-miR-1934-5p	0.271571	0.497078	NOT
mmu-miR-1936	-0.201361	1	NOT
mmu-miR-1938	-0.707653	1	NOT
mmu-miR-193a-3p	0.114922	0.585443	NOT
mmu-miR-193a-5p	0.132892	0.337358	NOT
mmu-miR-193b-3p	-0.610701	8.41706e-06	NOT
mmu-miR-193b-5p	0.0709572	0.810938	NOT
mmu-miR-194-1-3p	-3.95556	0.0770956	NOT
mmu-miR-194-2-3p	-0.402107	0.180661	NOT
mmu-miR-194-5p	-0.332102	0.00168763	NOT
mmu-miR-1941-3p	0.600738	0.00133508	NOT
mmu-miR-1941-5p	0.641849	0.0124353	NOT
mmu-miR-1943-3p	0.384185	0.269544	NOT
mmu-miR-1943-5p	0.22152	0.274318	NOT
mmu-miR-1945	0.684542	0.196447	NOT
mmu-miR-1946a	-2.75479	0.50451	NOT
mmu-miR-1946b	-1.00679	1	NOT
mmu-miR-1947-3p	-1.99734	1	NOT
mmu-miR-1947-5p	0.126939	0.612115	NOT
mmu-miR-1948-3p	-1.92793	1	NOT
mmu-miR-1948-5p	1.07647	0.0365131	UP
mmu-miR-1949	-1.39247	0.0956145	NOT
mmu-miR-1950	0.86257	0.364862	NOT
mmu-miR-1951	0.634271	1	NOT
mmu-miR-1953	0.987405	0.0901254	NOT
mmu-miR-1954	0.195822	0.443445	NOT
mmu-miR-1955-3p	-0.205148	0.720504	NOT
mmu-miR-1955-5p	0.640274	0.033775	NOT
mmu-miR-1956	1.23264	0.302719	NOT
mmu-miR-1958	0.0320928	1	NOT
mmu-miR-195a-3p	0.604282	1.08736e-06	NOT
mmu-miR-195a-5p	0.248046	0.014558	NOT
mmu-miR-195b	-0.404794	0.625449	NOT
mmu-miR-1960	-0.00175559	1	NOT
mmu-miR-1961	0.0980025	1	NOT
mmu-miR-1963	0	1	NOT
mmu-miR-1964-3p	0.82663	1e-06	NOT
mmu-miR-1966-3p	-0.77349	0.0219945	NOT
mmu-miR-1966-5p	0.329576	1	NOT
mmu-miR-1968-3p	-3.35848	0.33436	NOT
mmu-miR-1968-5p	0.903434	0.000639757	NOT
mmu-miR-1969	-1.55133	0.00027718	DOWN
mmu-miR-196a-1-3p	-2.05665	0.0138901	DOWN
mmu-miR-196a-5p	-2.31971	1e-06	DOWN
mmu-miR-196b-5p	-0.195999	0.467154	NOT
mmu-miR-1970	-0.202698	1	NOT
mmu-miR-1970b-5p	-0.689092	1	NOT
mmu-miR-1970c-3p	-2.76652	0.507662	NOT
mmu-miR-1970c-5p	-0.896515	0.218808	NOT
mmu-miR-1971	0	1	NOT
mmu-miR-1981-3p	0.471106	0.00197656	NOT
mmu-miR-1981-5p	0.288968	0.0112379	NOT
mmu-miR-1982-3p	-0.0580429	1	NOT
mmu-miR-1982-5p	0	1	NOT
mmu-miR-1983	-0.269793	0.136936	NOT
mmu-miR-199a-3p	0.0887294	0.383742	NOT
mmu-miR-199a-5p	-0.0127416	0.902432	NOT
mmu-miR-199b-3p	0.0886137	0.385326	NOT
mmu-miR-199b-5p	-0.174417	0.17879	NOT
mmu-miR-19a-3p	-0.162305	0.184278	NOT
mmu-miR-19a-5p	0.581795	1	NOT
mmu-miR-19b-1-5p	-0.765816	0.024961	NOT
mmu-miR-19b-3p	-0.362135	0.00470162	NOT
mmu-miR-1a-1-5p	-0.464416	0.642727	NOT
mmu-miR-1a-2-5p	0	1	NOT
mmu-miR-1a-3p	0.426597	0.0322738	NOT
mmu-miR-1b-3p	-0.0295417	1	NOT
mmu-miR-1b-5p	0.918981	0.206403	NOT
mmu-miR-200a-3p	0.0891126	0.380925	NOT
mmu-miR-200a-5p	0.371667	0.00188314	NOT
mmu-miR-200b-3p	0.232009	0.0235709	NOT
mmu-miR-200b-5p	0.208551	0.106402	NOT
mmu-miR-200c-3p	-0.102827	0.319622	NOT
mmu-miR-200c-5p	0.0235983	1	NOT
mmu-miR-201-3p	-0.171634	1	NOT
mmu-miR-201-5p	1.16452	0.0298812	UP
mmu-miR-202-5p	0.68129	0.705357	NOT
mmu-miR-203-3p	0.107293	0.390148	NOT
mmu-miR-203-5p	0.438363	0.213612	NOT
mmu-miR-203b-3p	-0.328913	0.438741	NOT
mmu-miR-204-3p	3.55613	0.000203608	UP
mmu-miR-204-5p	0.751085	0.000155567	NOT
mmu-miR-205-3p	0.142307	1	NOT
mmu-miR-205-5p	-0.308308	0.14308	NOT
mmu-miR-206-3p	-1.98818	1.36551e-05	DOWN
mmu-miR-208a-3p	0.8877	1.91034e-06	NOT
mmu-miR-208a-5p	0.25403	0.865975	NOT
mmu-miR-208b-3p	-0.566916	0.0285177	NOT
mmu-miR-208b-5p	3.08622	0.283308	NOT
mmu-miR-20a-3p	-0.178995	0.509343	NOT
mmu-miR-20a-5p	-0.334964	0.00371935	NOT
mmu-miR-20b-3p	1.80135	1	NOT
mmu-miR-20b-5p	0.402375	0.00390219	NOT
mmu-miR-210-3p	0.10816	0.405288	NOT
mmu-miR-210-5p	-0.643706	0.050215	NOT
mmu-miR-211-3p	-1.37083	0.697741	NOT
mmu-miR-211-5p	0.432473	0.192104	NOT
mmu-miR-212-3p	-0.0998532	0.744921	NOT
mmu-miR-212-5p	-0.0673377	0.688614	NOT
mmu-miR-2137	-0.0230657	1	NOT
mmu-miR-214-3p	0.0184831	0.861391	NOT
mmu-miR-214-5p	0.0606884	0.574412	NOT
mmu-miR-215-3p	-2.02364	0.102605	NOT
mmu-miR-215-5p	-0.632001	8.17741e-05	NOT
mmu-miR-216a-3p	0.57037	1	NOT
mmu-miR-216a-5p	1.27902	0.255323	NOT
mmu-miR-216b-3p	0.634051	1	NOT
mmu-miR-216b-5p	-0.051559	1	NOT
mmu-miR-216c-5p	-0.442598	0.833207	NOT
mmu-miR-217-5p	-0.792156	0.0267413	NOT
mmu-miR-218-1-3p	0.0183949	1	NOT
mmu-miR-218-2-3p	-0.447599	1	NOT
mmu-miR-218-5p	-0.123496	0.219342	NOT
mmu-miR-219a-1-3p	0.425441	0.0878935	NOT
mmu-miR-219a-2-3p	0	1	NOT
mmu-miR-219a-5p	0.00954241	1	NOT
mmu-miR-219b-3p	-0.171108	1	NOT
mmu-miR-219b-5p	0.320344	1	NOT
mmu-miR-219c-3p	-1.84708	0.382207	NOT
mmu-miR-219c-5p	0.854251	0.324628	NOT
mmu-miR-21a-3p	0.509772	0.0208547	NOT
mmu-miR-21a-5p	0.168348	0.11831	NOT
mmu-miR-21b	0.110775	0.578631	NOT
mmu-miR-21c	0.00981431	1	NOT
mmu-miR-22-3p	0.304803	0.00301623	NOT
mmu-miR-22-5p	0.367219	0.000652778	NOT
mmu-miR-221-3p	-0.0537469	0.591054	NOT
mmu-miR-221-5p	0.243824	0.0350083	NOT
mmu-miR-222-3p	0.281532	0.00661876	NOT
mmu-miR-222-5p	-0.0705706	0.65695	NOT
mmu-miR-223-3p	0.168165	0.24621	NOT
mmu-miR-223-5p	0.10301	0.451681	NOT
mmu-miR-224-3p	-0.323769	0.583631	NOT
mmu-miR-224-5p	-0.769827	1e-06	NOT
mmu-miR-23a-3p	-0.023413	0.848441	NOT
mmu-miR-23a-5p	-0.0588897	0.931863	NOT
mmu-miR-23b-3p	-0.0264246	0.820125	NOT
mmu-miR-23b-5p	-0.0211531	0.944946	NOT
mmu-miR-24-1-5p	0.422678	0.000198151	NOT
mmu-miR-24-2-5p	0.191935	0.0704014	NOT
mmu-miR-24-3p	0.333922	0.00174739	NOT
mmu-miR-25-3p	-0.0162649	0.883692	NOT
mmu-miR-25-5p	0.270615	0.0827746	NOT
mmu-miR-26a-1-3p	-0.127798	0.623038	NOT
mmu-miR-26a-2-3p	0.0595815	0.737327	NOT
mmu-miR-26a-5p	-0.194474	0.0595784	NOT
mmu-miR-26b-3p	0.211891	0.15095	NOT
mmu-miR-26b-5p	-0.0641697	0.521489	NOT
mmu-miR-27a-3p	0.398583	0.000133733	NOT
mmu-miR-27a-5p	0.0705819	0.710072	NOT
mmu-miR-27b-3p	0.358061	0.00133085	NOT
mmu-miR-27b-5p	0.515306	1.05451e-05	NOT
mmu-miR-28a-3p	0.405453	0.00044517	NOT
mmu-miR-28a-5p	0.067501	0.533798	NOT
mmu-miR-28b	0.58283	0.809078	NOT
mmu-miR-28c	0.0407244	0.789699	NOT
mmu-miR-290a-5p	0	1	NOT
mmu-miR-290b-5p	1.80135	1	NOT
mmu-miR-291a-3p	0.0458678	1	NOT
mmu-miR-291a-5p	-0.200062	1	NOT
mmu-miR-291b-5p	0	1	NOT
mmu-miR-292a-3p	0.551464	0.341954	NOT
mmu-miR-292a-5p	1.01681	0.0509038	NOT
mmu-miR-292b-5p	2.54569	0.55624	NOT
mmu-miR-293-3p	0.481733	0.473864	NOT
mmu-miR-293-5p	0.46491	0.692609	NOT
mmu-miR-294-3p	-0.208904	0.83568	NOT
mmu-miR-295-3p	-0.100073	0.918656	NOT
mmu-miR-296-3p	0.887211	3.65477e-05	NOT
mmu-miR-296-5p	-0.365968	0.00624889	NOT
mmu-miR-297a-3p	0.0984334	0.655227	NOT
mmu-miR-297a-5p	0.820773	0.100922	NOT
mmu-miR-297b-3p	0.0984564	0.654971	NOT
mmu-miR-297b-5p	0.396226	0.187088	NOT
mmu-miR-297c-3p	0.0984263	0.655306	NOT
mmu-miR-297c-5p	-0.953864	1	NOT
mmu-miR-298-3p	-0.493599	0.157155	NOT
mmu-miR-298-5p	0.471266	0.000313358	NOT
mmu-miR-299a-3p	-0.449777	0.00232475	NOT
mmu-miR-299a-5p	-0.796304	1e-06	NOT
mmu-miR-299b-3p	0.581795	1	NOT
mmu-miR-299b-5p	1.80134	1	NOT
mmu-miR-29a-3p	-0.267639	0.00855474	NOT
mmu-miR-29a-5p	-0.138038	0.48424	NOT
mmu-miR-29b-1-5p	-0.381727	0.0947643	NOT
mmu-miR-29b-2-5p	0.194384	0.29133	NOT
mmu-miR-29b-3p	-0.457562	3.22186e-05	NOT
mmu-miR-29c-3p	-0.15199	0.226654	NOT
mmu-miR-29c-5p	0.0736924	0.562661	NOT
mmu-miR-300-3p	-0.1798	0.133767	NOT
mmu-miR-300-5p	-1.25031	0.0645753	NOT
mmu-miR-301a-3p	0.100277	0.46218	NOT
mmu-miR-301a-5p	0.104881	0.400044	NOT
mmu-miR-301b-3p	0.00900282	1	NOT
mmu-miR-301b-5p	0.0245874	1	NOT
mmu-miR-302b-3p	0	1	NOT
mmu-miR-302d-3p	0	1	NOT
mmu-miR-3057-3p	0.460488	0.6765	NOT
mmu-miR-3057-5p	0.409924	0.0379682	NOT
mmu-miR-3058-3p	-0.423705	0.60793	NOT
mmu-miR-3058-5p	-0.266949	0.710705	NOT
mmu-miR-3059-5p	0.625164	1	NOT
mmu-miR-3060-3p	0.269746	0.230396	NOT
mmu-miR-3061-3p	0.119062	0.834928	NOT
mmu-miR-3061-5p	0.586519	0.166792	NOT
mmu-miR-3062-5p	-0.0568554	1	NOT
mmu-miR-3063-3p	-1.97532	1	NOT
mmu-miR-3064-3p	-0.214955	0.873869	NOT
mmu-miR-3064-5p	0.35627	0.238332	NOT
mmu-miR-3065-3p	0	1	NOT
mmu-miR-3065-5p	-1.14807	0.484119	NOT
mmu-miR-3066-3p	0.0105921	1	NOT
mmu-miR-3066-5p	-0.317412	0.130485	NOT
mmu-miR-3067-5p	-0.953733	1	NOT
mmu-miR-3068-3p	0.352621	0.00798099	NOT
mmu-miR-3068-5p	0.414452	0.000123909	NOT
mmu-miR-3069-3p	-0.632559	0.206649	NOT
mmu-miR-3069-5p	-0.692669	1	NOT
mmu-miR-3070-2-3p	0	1	NOT
mmu-miR-3070-5p	0	1	NOT
mmu-miR-3072-3p	-1.40567	1e-06	DOWN
mmu-miR-3072-5p	0	1	NOT
mmu-miR-3073a-3p	0	1	NOT
mmu-miR-3073b-5p	1.80133	1	NOT
mmu-miR-3074-1-3p	-0.93859	5.15233e-06	NOT
mmu-miR-3074-2-3p	0	1	NOT
mmu-miR-3074-5p	-0.368662	0.00767307	NOT
mmu-miR-3075-5p	-0.454201	0.852919	NOT
mmu-miR-3076-3p	-0.030828	1	NOT
mmu-miR-3076-5p	0.0279345	1	NOT
mmu-miR-3077-3p	1.18235	0.221576	NOT
mmu-miR-3077-5p	0	1	NOT
mmu-miR-3079-3p	-0.0938573	1	NOT
mmu-miR-3079-5p	0.79983	0.174463	NOT
mmu-miR-3080-3p	0	1	NOT
mmu-miR-3080-5p	0.00978547	1	NOT
mmu-miR-3081-3p	-0.00557658	0.965092	NOT
mmu-miR-3081-5p	-1.92989	1	NOT
mmu-miR-3082-3p	-0.357899	0.20579	NOT
mmu-miR-3082-5p	-0.350931	0.651768	NOT
mmu-miR-3083-3p	-0.151356	1	NOT
mmu-miR-3083-5p	-0.665067	0.053395	NOT
mmu-miR-3083b-3p	2.57651	0.500015	NOT
mmu-miR-3084-3p	0.217094	0.485558	NOT
mmu-miR-3084-5p	-0.296789	0.276561	NOT
mmu-miR-3085-3p	-0.880623	1	NOT
mmu-miR-3086-3p	2.57653	0.500743	NOT
mmu-miR-3086-5p	0.696335	0.075916	NOT
mmu-miR-3087-3p	0.932605	0.396547	NOT
mmu-miR-3087-5p	-0.156073	1	NOT
mmu-miR-3088-3p	-1.1059	0.0851321	NOT
mmu-miR-3089-3p	-0.207088	0.766511	NOT
mmu-miR-3089-5p	0	1	NOT
mmu-miR-3090-3p	0.306163	1	NOT
mmu-miR-3091-3p	-1.14691	0.227027	NOT
mmu-miR-3091-5p	-1.93164	1	NOT
mmu-miR-3092-3p	1.25507	0.343757	NOT
mmu-miR-3094-3p	-1.07204	0.691379	NOT
mmu-miR-3094-5p	0.357788	0.699483	NOT
mmu-miR-3095-3p	0.333322	0.352667	NOT
mmu-miR-3095-5p	0.36223	0.673044	NOT
mmu-miR-3097-3p	-0.00699357	1	NOT
mmu-miR-3097-5p	-0.554736	0.0446149	NOT
mmu-miR-3098-3p	0.837071	0.0619445	NOT
mmu-miR-3098-5p	0.909092	0.454752	NOT
mmu-miR-3099-3p	-0.915854	0.00344664	NOT
mmu-miR-3099-5p	0	1	NOT
mmu-miR-30a-3p	-0.261741	0.0106916	NOT
mmu-miR-30a-5p	-0.351984	0.000899815	NOT
mmu-miR-30b-3p	-0.151078	0.225937	NOT
mmu-miR-30b-5p	-0.267894	0.0223983	NOT
mmu-miR-30c-1-3p	0.198631	0.200641	NOT
mmu-miR-30c-2-3p	-0.449287	6.94291e-06	NOT
mmu-miR-30c-5p	-0.314378	0.00438061	NOT
mmu-miR-30d-3p	-0.23911	0.034964	NOT
mmu-miR-30d-5p	-0.0909685	0.394788	NOT
mmu-miR-30e-3p	-0.0185934	0.857617	NOT
mmu-miR-30e-5p	0.0293281	0.779333	NOT
mmu-miR-30f	-0.406762	1	NOT
mmu-miR-31-3p	-0.271762	0.15954	NOT
mmu-miR-31-5p	-0.123921	0.22701	NOT
mmu-miR-3100-5p	0.588278	0.804234	NOT
mmu-miR-3101-3p	1.80126	1	NOT
mmu-miR-3101-5p	0.466104	0.737887	NOT
mmu-miR-3102-3p	0.508942	0.000257603	NOT
mmu-miR-3102-3p.2-3p	0.508945	0.000256049	NOT
mmu-miR-3102-5p	0.546513	0.0488171	NOT
mmu-miR-3102-5p.2-5p	0.546466	0.0485907	NOT
mmu-miR-3103-3p	0.57294	0.191477	NOT
mmu-miR-3103-5p	-0.868252	0.746078	NOT
mmu-miR-3105-3p	0.779594	0.00382202	NOT
mmu-miR-3105-5p	0.28007	1	NOT
mmu-miR-3108-3p	-0.968216	1	NOT
mmu-miR-3108-5p	0.661153	0.747114	NOT
mmu-miR-3109-3p	0.232878	0.604946	NOT
mmu-miR-3109-5p	0.0533313	0.89896	NOT
mmu-miR-3110-5p	-0.682127	0.109016	NOT
mmu-miR-3112-3p	-0.093864	1	NOT
mmu-miR-3112-5p	-0.464564	0.594907	NOT
mmu-miR-3113-3p	0	1	NOT
mmu-miR-3113-5p	-3.1726	0.33436	NOT
mmu-miR-3154	1.45681	0.244469	NOT
mmu-miR-32-3p	0.233255	0.133699	NOT
mmu-miR-32-5p	0.33401	0.00168624	NOT
mmu-miR-320-3p	0.259431	0.0170043	NOT
mmu-miR-320-5p	-3.1726	0.33436	NOT
mmu-miR-322-3p	0.174163	0.135902	NOT
mmu-miR-322-5p	-0.56098	3.21376e-06	NOT
mmu-miR-323-3p	-0.239393	0.344581	NOT
mmu-miR-323-5p	-3.69207	0.213233	NOT
mmu-miR-324-3p	0.0998898	0.503742	NOT
mmu-miR-324-5p	-0.166272	0.218428	NOT
mmu-miR-325-3p	-0.156082	1	NOT
mmu-miR-325-5p	-0.756026	0.805224	NOT
mmu-miR-326-3p	-0.00352611	0.976033	NOT
mmu-miR-326-5p	-1.86617	0.0474259	DOWN
mmu-miR-328-3p	0.338936	0.0010201	NOT
mmu-miR-328-5p	2.04489	0.140806	NOT
mmu-miR-329-3p	-0.613552	1.01747e-05	NOT
mmu-miR-329-5p	-0.348418	0.0100546	NOT
mmu-miR-33-3p	-0.158813	0.488324	NOT
mmu-miR-33-5p	0.734713	7.82351e-05	NOT
mmu-miR-330-3p	0.204945	0.0754941	NOT
mmu-miR-330-5p	0.10483	0.320941	NOT
mmu-miR-331-3p	0.161207	0.178867	NOT
mmu-miR-331-5p	0.277549	0.153929	NOT
mmu-miR-335-3p	0.447496	3.80651e-05	NOT
mmu-miR-335-5p	-0.228928	0.0788537	NOT
mmu-miR-337-3p	-0.409996	0.181426	NOT
mmu-miR-337-5p	-0.229487	0.0493058	NOT
mmu-miR-338-3p	0.704789	1e-06	NOT
mmu-miR-338-5p	0.379937	0.00220727	NOT
mmu-miR-339-3p	0.0229922	0.853804	NOT
mmu-miR-339-5p	-0.380765	0.00076574	NOT
mmu-miR-340-3p	-0.0319102	0.753961	NOT
mmu-miR-340-5p	-0.0372203	0.737534	NOT
mmu-miR-341-3p	-0.0845205	0.655147	NOT
mmu-miR-341-5p	-1.47413	0.654713	NOT
mmu-miR-342-3p	-0.0451545	0.67253	NOT
mmu-miR-342-5p	-0.149678	0.26842	NOT
mmu-miR-344-3p	-0.0839184	0.585062	NOT
mmu-miR-344-5p	3.09242	0.279535	NOT
mmu-miR-344b-3p	1.78983	0.120939	NOT
mmu-miR-344c-3p	1.47593	0.081349	NOT
mmu-miR-344d-2-5p	3.07281	0.277922	NOT
mmu-miR-344d-3-5p	-1.92985	1	NOT
mmu-miR-344d-3p	0.259354	0.743504	NOT
mmu-miR-344e-3p	0.181025	1	NOT
mmu-miR-344f-3p	0.195902	0.870793	NOT
mmu-miR-344g-3p	0.949405	0.159691	NOT
mmu-miR-344g-5p	-0.178527	1	NOT
mmu-miR-344i	1.45652	0.496234	NOT
mmu-miR-345-3p	0.177591	0.103497	NOT
mmu-miR-345-5p	-0.264833	0.0263659	NOT
mmu-miR-346-5p	2.60979	0.0397242	UP
mmu-miR-3470a	-0.605697	0.100592	NOT
mmu-miR-3470b	-0.0135857	0.965311	NOT
mmu-miR-3472	1.47641	0.445613	NOT
mmu-miR-3473a	1.06816	0.0100211	UP
mmu-miR-3473b	0.100137	0.83157	NOT
mmu-miR-3473d	0.192364	0.682258	NOT
mmu-miR-3473e	-0.018816	1	NOT
mmu-miR-3473g	0.518287	1	NOT
mmu-miR-3474	-0.106605	0.760087	NOT
mmu-miR-3475-3p	1.11182	0.24874	NOT
mmu-miR-34a-3p	-0.398627	0.287748	NOT
mmu-miR-34a-5p	-0.169907	0.139834	NOT
mmu-miR-34b-3p	-0.12785	0.228312	NOT
mmu-miR-34b-5p	-0.524394	1e-06	NOT
mmu-miR-34c-3p	-0.215801	0.0473297	NOT
mmu-miR-34c-5p	-0.345754	0.00144152	NOT
mmu-miR-350-3p	0.216079	0.0879662	NOT
mmu-miR-350-5p	0.109971	0.535094	NOT
mmu-miR-351-3p	0.265988	0.0786927	NOT
mmu-miR-351-5p	0.395105	0.00010651	NOT
mmu-miR-3535	-0.11085	0.399173	NOT
mmu-miR-3547-3p	0.162677	1	NOT
mmu-miR-3552	1.64073	0.0234441	UP
mmu-miR-3569-3p	0.697952	1	NOT
mmu-miR-3569-5p	-0.611861	0.763834	NOT
mmu-miR-3572-3p	0.28993	0.486528	NOT
mmu-miR-3572-5p	-0.180396	1	NOT
mmu-miR-361-3p	0.353192	0.00105085	NOT
mmu-miR-361-5p	0.0723694	0.496517	NOT
mmu-miR-3618-5p	1.80128	1	NOT
mmu-miR-362-3p	0.0495961	0.767691	NOT
mmu-miR-362-5p	0.140823	0.230509	NOT
mmu-miR-363-3p	0.735898	3.33433e-06	NOT
mmu-miR-363-5p	0.423697	0.400642	NOT
mmu-miR-365-1-5p	0.263801	0.42005	NOT
mmu-miR-365-2-5p	-0.0760693	0.740721	NOT
mmu-miR-365-3p	-0.0582432	0.6177	NOT
mmu-miR-369-3p	-0.524276	9.22651e-05	NOT
mmu-miR-369-5p	-0.524681	0.00121511	NOT
mmu-miR-370-3p	-0.209572	0.142595	NOT
mmu-miR-370-5p	0.258129	0.847215	NOT
mmu-miR-374b-5p	0.230058	0.0285388	NOT
mmu-miR-374c-3p	2.57651	0.500015	NOT
mmu-miR-374c-5p	0.906738	0.583142	NOT
mmu-miR-375-3p	-0.138019	0.274943	NOT
mmu-miR-376a-3p	-1.30808	0.000348599	DOWN
mmu-miR-376a-5p	-1.00348	1e-06	DOWN
mmu-miR-376b-3p	-0.373233	0.0235452	NOT
mmu-miR-376b-5p	-0.600849	0.000106727	NOT
mmu-miR-376c-3p	-0.922186	1e-06	NOT
mmu-miR-376c-5p	-1.06914	0.010635	DOWN
mmu-miR-377-3p	-0.441492	0.0692695	NOT
mmu-miR-377-5p	-1.01578	0.00704098	DOWN
mmu-miR-378a-3p	0.310048	0.00282551	NOT
mmu-miR-378a-5p	0.0219279	0.881008	NOT
mmu-miR-378b	0.424714	0.00125563	NOT
mmu-miR-378c	0.281217	0.00875088	NOT
mmu-miR-378d	0.208652	0.0610845	NOT
mmu-miR-379-3p	-0.292005	0.0406543	NOT
mmu-miR-379-5p	-0.583077	1e-06	NOT
mmu-miR-380-3p	-0.158828	0.469092	NOT
mmu-miR-380-5p	-0.954396	1.31837e-06	NOT
mmu-miR-381-3p	-0.477509	6.88107e-05	NOT
mmu-miR-381-5p	-1.45283	0.642764	NOT
mmu-miR-382-3p	-0.502897	0.0118059	NOT
mmu-miR-382-5p	-0.518886	1.75124e-05	NOT
mmu-miR-383-5p	-0.44608	0.051015	NOT
mmu-miR-384-3p	1.7181	0.0172603	UP
mmu-miR-384-5p	-0.543982	0.440845	NOT
mmu-miR-3960	2.57793	0.50319	NOT
mmu-miR-3962	-0.160141	0.692449	NOT
mmu-miR-3963	-1.22095	3.02244e-06	DOWN
mmu-miR-3964	0.638894	0.0199137	NOT
mmu-miR-3966	-1.0507	0.725283	NOT
mmu-miR-3967	-1.97532	1	NOT
mmu-miR-3968	0.229259	0.171648	NOT
mmu-miR-3969	-0.106885	1	NOT
mmu-miR-3970	-0.00360621	0.991087	NOT
mmu-miR-3971	2.54569	0.55624	NOT
mmu-miR-409-3p	-0.0644391	0.630725	NOT
mmu-miR-409-5p	-0.584037	0.000140938	NOT
mmu-miR-410-3p	-0.535727	0.00414887	NOT
mmu-miR-410-5p	-1.60252	0.342996	NOT
mmu-miR-411-3p	-0.0419624	0.775928	NOT
mmu-miR-411-5p	-0.53658	1e-06	NOT
mmu-miR-412-3p	-1.13208	0.342546	NOT
mmu-miR-412-5p	-1.02618	0.000454262	DOWN
mmu-miR-421-3p	0.151913	0.165766	NOT
mmu-miR-421-5p	-0.744527	0.76421	NOT
mmu-miR-423-3p	0.0553142	0.618275	NOT
mmu-miR-423-5p	0.0402658	0.705904	NOT
mmu-miR-425-3p	0.370582	0.00206603	NOT
mmu-miR-425-5p	0.458777	1.43653e-05	NOT
mmu-miR-429-3p	-0.0133749	0.893775	NOT
mmu-miR-431-3p	0.117196	0.849732	NOT
mmu-miR-431-5p	-0.707323	5.12603e-06	NOT
mmu-miR-433-3p	-0.556844	6.8833e-06	NOT
mmu-miR-433-5p	-0.209509	0.780947	NOT
mmu-miR-434-3p	-0.940291	1e-06	NOT
mmu-miR-434-5p	-0.314584	0.00331077	NOT
mmu-miR-448-3p	1.27244	7.45904e-06	UP
mmu-miR-448-5p	0.746786	0.542265	NOT
mmu-miR-449a-3p	2.92284	1e-06	UP
mmu-miR-449a-5p	0.541444	0.000255665	NOT
mmu-miR-449b	0.639585	0.646433	NOT
mmu-miR-449c-3p	-0.204802	1	NOT
mmu-miR-449c-5p	2.57819	1e-06	UP
mmu-miR-450a-1-3p	0.270215	0.0741041	NOT
mmu-miR-450a-2-3p	0.466617	0.0499122	NOT
mmu-miR-450a-5p	-0.043731	0.666167	NOT
mmu-miR-450b-3p	0.33452	0.00344828	NOT
mmu-miR-450b-5p	0.600652	1e-06	NOT
mmu-miR-451a	-0.205952	0.28578	NOT
mmu-miR-455-3p	-0.00324216	0.975659	NOT
mmu-miR-455-5p	-0.0346912	0.75909	NOT
mmu-miR-463-3p	1.80135	1	NOT
mmu-miR-463-5p	0	1	NOT
mmu-miR-465a-3p	2.58682	0.0475514	UP
mmu-miR-465b-3p	2.58684	0.0474573	UP
mmu-miR-465b-5p	4.54573	0.0124464	UP
mmu-miR-465c-3p	2.58688	0.0473177	UP
mmu-miR-465c-5p	3.97458	0.0552602	NOT
mmu-miR-466a-3p	0.185981	0.304778	NOT
mmu-miR-466a-5p	0.285316	1	NOT
mmu-miR-466b-3p	0.22755	0.188685	NOT
mmu-miR-466b-5p	0.116926	0.649775	NOT
mmu-miR-466c-3p	0.231119	0.174221	NOT
mmu-miR-466c-5p	0.161498	0.475607	NOT
mmu-miR-466d-3p	0.176411	0.337505	NOT
mmu-miR-466d-5p	0.632625	0.192891	NOT
mmu-miR-466e-3p	0.24045	0.161782	NOT
mmu-miR-466e-5p	-0.641174	0.0776085	NOT
mmu-miR-466f	1.70465	0.00423743	UP
mmu-miR-466g	0.211791	0.526489	NOT
mmu-miR-466h-3p	0.558647	0.142686	NOT
mmu-miR-466h-5p	0.667653	0.0234527	NOT
mmu-miR-466i-3p	0.897893	0.0680215	NOT
mmu-miR-466i-5p	-0.469903	0.0519689	NOT
mmu-miR-466j	-0.513042	0.495219	NOT
mmu-miR-466l-3p	-1.45688	0.643355	NOT
mmu-miR-466m-3p	0.764291	0.377219	NOT
mmu-miR-466m-5p	0.0861969	1	NOT
mmu-miR-466n-3p	0.747718	0.437805	NOT
mmu-miR-466n-5p	0.632622	0.19259	NOT
mmu-miR-466o-3p	-1.93146	1	NOT
mmu-miR-466o-5p	0.151878	0.543135	NOT
mmu-miR-466p-3p	0.231145	0.173502	NOT
mmu-miR-466p-5p	0.386009	0.236621	NOT
mmu-miR-467a-3p	0.148724	0.378549	NOT
mmu-miR-467a-5p	0.199672	0.164196	NOT
mmu-miR-467b-3p	0.28887	1	NOT
mmu-miR-467b-5p	0.199188	0.165386	NOT
mmu-miR-467c-3p	0.223156	0.890359	NOT
mmu-miR-467c-5p	0.349247	0.0276851	NOT
mmu-miR-467d-3p	0.148739	0.378065	NOT
mmu-miR-467d-5p	0.369875	0.114251	NOT
mmu-miR-467e-3p	-0.37955	0.492608	NOT
mmu-miR-467e-5p	0.119522	0.396428	NOT
mmu-miR-467h	-0.929214	0.621084	NOT
mmu-miR-468-3p	0	1	NOT
mmu-miR-470-5p	4.8519	0.00525991	UP
mmu-miR-471-3p	-1.93293	1	NOT
mmu-miR-471-5p	3.44165	0.147477	NOT
mmu-miR-483-3p	-1.74798	0.00270015	DOWN
mmu-miR-483-5p	-1.50408	0.241741	NOT
mmu-miR-484	0.632168	1e-06	NOT
mmu-miR-485-3p	0.266563	0.136213	NOT
mmu-miR-485-5p	-0.673056	0.00161425	NOT
mmu-miR-486a-3p	0.392411	0.0131171	NOT
mmu-miR-486a-5p	0.125597	0.447204	NOT
mmu-miR-486b-3p	0.427111	0.186124	NOT
mmu-miR-486b-5p	0.121126	0.462471	NOT
mmu-miR-487b-3p	-0.447266	0.0386592	NOT
mmu-miR-487b-5p	0	1	NOT
mmu-miR-488-3p	-0.451595	0.336324	NOT
mmu-miR-488-5p	1.81958	1	NOT
mmu-miR-489-3p	4.34353	1e-06	UP
mmu-miR-490-3p	-0.109764	0.404864	NOT
mmu-miR-490-5p	0.229535	0.204315	NOT
mmu-miR-491-3p	0.499389	0.621068	NOT
mmu-miR-491-5p	0.0726455	0.75476	NOT
mmu-miR-493-3p	-0.765404	0.0355578	NOT
mmu-miR-493-5p	-0.398362	0.0618104	NOT
mmu-miR-494-3p	-0.719961	1e-06	NOT
mmu-miR-494-5p	-1.70308	0.129777	NOT
mmu-miR-495-3p	0.477913	0.000536401	NOT
mmu-miR-495-5p	2.60937	0.55624	NOT
mmu-miR-496a-3p	-0.797127	4.58898e-05	NOT
mmu-miR-496a-5p	-3.95543	0.0768649	NOT
mmu-miR-497a-3p	1.14718	0.000454829	UP
mmu-miR-497a-5p	0.183246	0.0661504	NOT
mmu-miR-497b	0.184137	0.682879	NOT
mmu-miR-499-3p	-0.182401	1	NOT
mmu-miR-499-5p	0.201808	0.323646	NOT
mmu-miR-500-3p	0.213446	0.233949	NOT
mmu-miR-500-5p	0.480531	0.312792	NOT
mmu-miR-501-3p	-0.0672419	0.540616	NOT
mmu-miR-501-5p	0.335381	0.161965	NOT
mmu-miR-503-3p	0.0357925	0.73665	NOT
mmu-miR-503-5p	-0.0847863	0.545723	NOT
mmu-miR-504-5p	0.686268	0.0311354	NOT
mmu-miR-505-3p	0.0305384	0.86109	NOT
mmu-miR-505-5p	0.0370104	0.906988	NOT
mmu-miR-5099	0.155058	0.250951	NOT
mmu-miR-5100	-0.161684	0.758726	NOT
mmu-miR-5101	0.139213	0.651662	NOT
mmu-miR-5103	1.7867	0.0281475	UP
mmu-miR-5104	1.70257	0.0458769	UP
mmu-miR-5106	0	1	NOT
mmu-miR-5107-3p	0.560683	0.202635	NOT
mmu-miR-5107-5p	0.636712	0.126674	NOT
mmu-miR-5108	0	1	NOT
mmu-miR-511-3p	0.030668	0.868261	NOT
mmu-miR-511-5p	0.0440437	0.934358	NOT
mmu-miR-5112	0	1	NOT
mmu-miR-5113	0.450835	0.0632727	NOT
mmu-miR-5114	0.052962	0.900891	NOT
mmu-miR-5116	0.030916	1	NOT
mmu-miR-5119	-2.6824	0.55624	NOT
mmu-miR-5120	0.988502	0.455388	NOT
mmu-miR-5121	-0.198201	0.543929	NOT
mmu-miR-5122	1.53284	0.0172511	UP
mmu-miR-5123	-0.00655958	1	NOT
mmu-miR-5125	0.0513355	1	NOT
mmu-miR-5126	0.378334	0.257463	NOT
mmu-miR-5127	-1.93427	1	NOT
mmu-miR-5128	-0.0231833	1	NOT
mmu-miR-5129-3p	-0.436248	0.0173913	NOT
mmu-miR-5129-5p	-0.0526013	0.913343	NOT
mmu-miR-5130	3.08573	0.276739	NOT
mmu-miR-5132-3p	0.112537	1	NOT
mmu-miR-5132-5p	0.584744	0.264272	NOT
mmu-miR-5134-3p	1.10573	0.192308	NOT
mmu-miR-5134-5p	0.636332	0.469193	NOT
mmu-miR-532-3p	0.344837	0.0403913	NOT
mmu-miR-532-5p	0.233193	0.017496	NOT
mmu-miR-539-3p	-1.1119	0.443636	NOT
mmu-miR-539-5p	-0.75442	0.053007	NOT
mmu-miR-540-3p	0.366743	0.138868	NOT
mmu-miR-540-5p	0.129838	0.660098	NOT
mmu-miR-541-3p	-0.563608	0.0779482	NOT
mmu-miR-541-5p	-0.326319	0.00165661	NOT
mmu-miR-542-3p	0.341056	0.00806527	NOT
mmu-miR-542-5p	-0.28711	0.0805461	NOT
mmu-miR-543-3p	0.154032	0.324498	NOT
mmu-miR-543-5p	-0.514034	0.442316	NOT
mmu-miR-544-3p	-1.50347	0.653407	NOT
mmu-miR-544-5p	2.57787	0.503052	NOT
mmu-miR-547-3p	0.650035	0.0138915	NOT
mmu-miR-547-5p	0	1	NOT
mmu-miR-551b-3p	-0.296044	0.146425	NOT
mmu-miR-551b-5p	-0.939075	0.131456	NOT
mmu-miR-5615-3p	3.43484	0.170439	NOT
mmu-miR-5615-5p	0.0379297	0.938809	NOT
mmu-miR-5616-3p	-2.6824	0.55624	NOT
mmu-miR-5616-5p	-0.156078	1	NOT
mmu-miR-5617-5p	-1.46907	0.625023	NOT
mmu-miR-5619-3p	0.317053	1	NOT
mmu-miR-5619-5p	-0.86282	1	NOT
mmu-miR-5620-3p	1.81958	1	NOT
mmu-miR-5620-5p	-0.154863	0.780695	NOT
mmu-miR-5621-3p	-0.011328	1	NOT
mmu-miR-5621-5p	1.81958	1	NOT
mmu-miR-5622-3p	0	1	NOT
mmu-miR-5622-5p	-0.168362	1	NOT
mmu-miR-5623-3p	0	1	NOT
mmu-miR-5623-5p	3.08575	0.276837	NOT
mmu-miR-5624-3p	-0.171001	1	NOT
mmu-miR-5624-5p	2.29559	0.0172082	UP
mmu-miR-5625-3p	3.08621	0.283245	NOT
mmu-miR-5626-3p	3.45022	0.125023	NOT
mmu-miR-5626-5p	1.7907	1	NOT
mmu-miR-5627-3p	0.581795	1	NOT
mmu-miR-5627-5p	0.581795	1	NOT
mmu-miR-5709-3p	0.0606152	1	NOT
mmu-miR-5709-5p	0.0463896	0.949818	NOT
mmu-miR-574-3p	0.358997	0.00106825	NOT
mmu-miR-574-5p	-0.184114	0.099882	NOT
mmu-miR-582-3p	0.253744	0.0257617	NOT
mmu-miR-582-5p	-0.336182	0.0158735	NOT
mmu-miR-590-3p	0	1	NOT
mmu-miR-592-5p	-0.0543735	0.917692	NOT
mmu-miR-598-3p	0.0495064	0.78288	NOT
mmu-miR-615-3p	-0.216205	0.703994	NOT
mmu-miR-615-5p	-1.9315	1	NOT
mmu-miR-6238	0.0164055	1	NOT
mmu-miR-6239	-0.222273	0.860793	NOT
mmu-miR-6380	0.258432	1	NOT
mmu-miR-6392-5p	-1.97532	1	NOT
mmu-miR-6395	0.348796	0.18755	NOT
mmu-miR-6399	-3.1726	0.33436	NOT
mmu-miR-6402	0	1	NOT
mmu-miR-6412	0.474681	0.109421	NOT
mmu-miR-6418-3p	0.158399	0.645217	NOT
mmu-miR-6481	5.15847	0.00118185	UP
mmu-miR-6516-3p	-0.209189	0.861212	NOT
mmu-miR-6516-5p	-0.126102	0.610139	NOT
mmu-miR-652-3p	-0.27622	0.00744166	NOT
mmu-miR-652-5p	-0.0778796	0.778559	NOT
mmu-miR-653-3p	2.99228	0.00993745	UP
mmu-miR-653-5p	3.44976	1e-06	UP
mmu-miR-6537-3p	-2.6824	0.55624	NOT
mmu-miR-6538	0.278437	0.377246	NOT
mmu-miR-6539	-1.45312	0.0446309	DOWN
mmu-miR-654-3p	1.81958	1	NOT
mmu-miR-6540-3p	-0.00341227	1	NOT
mmu-miR-6540-5p	0.434627	0.0224073	NOT
mmu-miR-6546-3p	0	1	NOT
mmu-miR-6546-5p	-0.204023	0.822194	NOT
mmu-miR-664-3p	0.296282	0.0196115	NOT
mmu-miR-664-5p	0.176892	0.424579	NOT
mmu-miR-665-3p	-0.35131	0.303034	NOT
mmu-miR-665-5p	-0.708436	1	NOT
mmu-miR-666-3p	-1.66988	0.113424	NOT
mmu-miR-666-5p	-0.588472	0.0290689	NOT
mmu-miR-667-3p	-0.727609	0.00199263	NOT
mmu-miR-667-5p	-0.741349	0.115624	NOT
mmu-miR-668-3p	-0.269348	0.205859	NOT
mmu-miR-668-5p	-2.82637	0.55624	NOT
mmu-miR-669a-3-3p	-0.344695	0.620641	NOT
mmu-miR-669a-3p	0.236834	0.0756705	NOT
mmu-miR-669a-5p	0.440266	0.00908119	NOT
mmu-miR-669b-3p	-1.11431	0.074734	NOT
mmu-miR-669b-5p	0.262299	0.183316	NOT
mmu-miR-669c-3p	-0.177743	1	NOT
mmu-miR-669c-5p	0.0182552	0.896118	NOT
mmu-miR-669d-2-3p	-1.46632	0.650631	NOT
mmu-miR-669d-3p	-1.46633	0.650576	NOT
mmu-miR-669d-5p	-0.0246864	0.933618	NOT
mmu-miR-669e-3p	0.155446	0.874726	NOT
mmu-miR-669e-5p	-0.290543	0.275652	NOT
mmu-miR-669f-3p	0.142076	0.508014	NOT
mmu-miR-669f-5p	0.0661379	0.833328	NOT
mmu-miR-669h-3p	-1.92859	1	NOT
mmu-miR-669h-5p	0.261255	0.619232	NOT
mmu-miR-669k-5p	1.77314	0.311739	NOT
mmu-miR-669l-3p	-1.80492	0.427244	NOT
mmu-miR-669l-5p	-0.159401	0.481846	NOT
mmu-miR-669n	1.80137	1	NOT
mmu-miR-669o-3p	0.23683	0.0753841	NOT
mmu-miR-669o-5p	0.408407	0.0363726	NOT
mmu-miR-669p-3p	0.355001	0.288715	NOT
mmu-miR-669p-5p	0.440261	0.00900132	NOT
mmu-miR-670-3p	2.60937	0.55624	NOT
mmu-miR-670-5p	-1.92893	1	NOT
mmu-miR-671-3p	0.158896	0.247654	NOT
mmu-miR-671-5p	0.0731473	0.585943	NOT
mmu-miR-6715-5p	0.618678	0.37884	NOT
mmu-miR-672-3p	-0.282893	0.331488	NOT
mmu-miR-672-5p	-0.191305	0.106071	NOT
mmu-miR-673-3p	0.212808	0.603216	NOT
mmu-miR-673-5p	0.0974035	0.68268	NOT
mmu-miR-674-3p	0.258569	0.0179624	NOT
mmu-miR-674-5p	0.167099	0.139276	NOT
mmu-miR-675-3p	0.729766	0.724018	NOT
mmu-miR-675-5p	0	1	NOT
mmu-miR-676-3p	-0.385325	0.000513961	NOT
mmu-miR-676-5p	-0.065691	0.655773	NOT
mmu-miR-677-3p	2.57913	0.55624	NOT
mmu-miR-677-5p	-1.29585	1e-06	DOWN
mmu-miR-679-3p	0.2592	0.616508	NOT
mmu-miR-679-5p	-0.608399	0.0175526	NOT
mmu-miR-688	-1.35056	0.284663	NOT
mmu-miR-6896-5p	-0.606689	0.75409	NOT
mmu-miR-6897-3p	0	1	NOT
mmu-miR-6897-5p	0.00853016	1	NOT
mmu-miR-6898-3p	0	1	NOT
mmu-miR-6898-5p	0	1	NOT
mmu-miR-6899-3p	0.208431	0.379629	NOT
mmu-miR-6899-5p	-0.900612	1	NOT
mmu-miR-690	-0.0459453	0.945022	NOT
mmu-miR-6900-3p	-0.570649	1	NOT
mmu-miR-6900-5p	-0.956272	0.380353	NOT
mmu-miR-6901-3p	0.135372	0.762164	NOT
mmu-miR-6901-5p	-0.599591	0.381996	NOT
mmu-miR-6902-5p	2.57653	0.500751	NOT
mmu-miR-6903-3p	-0.308983	0.72286	NOT
mmu-miR-6903-5p	-0.54639	1	NOT
mmu-miR-6904-5p	-1.97532	1	NOT
mmu-miR-6906-3p	3.08567	0.276466	NOT
mmu-miR-6906-5p	-0.95403	1	NOT
mmu-miR-6907-3p	3.44164	0.147508	NOT
mmu-miR-6908-3p	1.79023	1	NOT
mmu-miR-6908-5p	-0.168748	1	NOT
mmu-miR-6909-3p	0	1	NOT
mmu-miR-6909-5p	-1.35815	0.283826	NOT
mmu-miR-6910-3p	-0.132812	1	NOT
mmu-miR-6911-3p	0.58293	0.0747711	NOT
mmu-miR-6911-5p	-0.950588	1	NOT
mmu-miR-6912-3p	1.79032	1	NOT
mmu-miR-6912-5p	0.321351	1	NOT
mmu-miR-6913-3p	0.214617	1	NOT
mmu-miR-6913-5p	-1.97532	1	NOT
mmu-miR-6914-3p	0.437491	0.78066	NOT
mmu-miR-6914-5p	3.07291	0.277337	NOT
mmu-miR-6915-3p	1.12377	0.697741	NOT
mmu-miR-6915-5p	-1.02459	1	NOT
mmu-miR-6916-3p	0	1	NOT
mmu-miR-6916-5p	0.160618	1	NOT
mmu-miR-6917-3p	3.08607	0.282496	NOT
mmu-miR-6917-5p	0	1	NOT
mmu-miR-6918-5p	0.32064	1	NOT
mmu-miR-6919-3p	0	1	NOT
mmu-miR-6919-5p	-1.36966	0.459869	NOT
mmu-miR-6920-5p	-1.11302	0.520658	NOT
mmu-miR-6921-3p	1.17032	0.697741	NOT
mmu-miR-6921-5p	-0.156079	1	NOT
mmu-miR-6922-3p	0.481771	0.734158	NOT
mmu-miR-6922-5p	0.184441	1	NOT
mmu-miR-6925-3p	1.79066	1	NOT
mmu-miR-6925-5p	0.208453	1	NOT
mmu-miR-6926-3p	-0.95303	1	NOT
mmu-miR-6926-5p	-2.6824	0.55624	NOT
mmu-miR-6927-3p	-2.7885	0.55624	NOT
mmu-miR-6928-3p	0.461317	0.757881	NOT
mmu-miR-6928-5p	1.81958	1	NOT
mmu-miR-6929-3p	-0.203188	1	NOT
mmu-miR-6929-5p	1.12235	0.625023	NOT
mmu-miR-693-3p	1.23413	0.302253	NOT
mmu-miR-6932-3p	1.27192	0.405899	NOT
mmu-miR-6932-5p	0.804495	0.339081	NOT
mmu-miR-6933-3p	-1.93034	1	NOT
mmu-miR-6933-5p	-0.737107	0.240518	NOT
mmu-miR-6934-5p	-0.560344	0.576527	NOT
mmu-miR-6935-3p	0	1	NOT
mmu-miR-6935-5p	0	1	NOT
mmu-miR-6936-3p	1.79016	1	NOT
mmu-miR-6937-3p	-1.93085	1	NOT
mmu-miR-6937-5p	-0.843478	0.274164	NOT
mmu-miR-6938-3p	0.271055	1	NOT
mmu-miR-6939-3p	0.487846	0.742291	NOT
mmu-miR-694	0.244748	0.792884	NOT
mmu-miR-6940-3p	-0.0472865	1	NOT
mmu-miR-6941-5p	1.81958	1	NOT
mmu-miR-6942-3p	-0.171428	1	NOT
mmu-miR-6942-5p	-0.222872	1	NOT
mmu-miR-6943-3p	-2.75646	0.507298	NOT
mmu-miR-6943-5p	3.08557	0.276012	NOT
mmu-miR-6944-3p	0.0528387	0.900769	NOT
mmu-miR-6945-3p	-0.00534472	1	NOT
mmu-miR-6946-3p	-0.502904	0.474651	NOT
mmu-miR-6946-5p	0.539741	0.66132	NOT
mmu-miR-6947-5p	-3.11054	0.00964625	DOWN
mmu-miR-6948-3p	0.130118	0.893977	NOT
mmu-miR-6948-5p	-0.984896	0.234125	NOT
mmu-miR-6950-3p	-1.32657	0.0499162	DOWN
mmu-miR-6950-5p	-0.180425	1	NOT
mmu-miR-6951-5p	-0.542573	0.422544	NOT
mmu-miR-6952-3p	0.325251	0.482574	NOT
mmu-miR-6952-5p	0.753473	0.558435	NOT
mmu-miR-6953-3p	2.60937	0.55624	NOT
mmu-miR-6954-3p	-0.169821	1	NOT
mmu-miR-6954-5p	1.80144	1	NOT
mmu-miR-6955-3p	0.276147	1	NOT
mmu-miR-6955-5p	-1.26391	0.0674578	NOT
mmu-miR-6956-3p	0.667709	1	NOT
mmu-miR-6957-3p	0.612365	0.614801	NOT
mmu-miR-6957-5p	-0.123573	1	NOT
mmu-miR-6958-3p	0.00239112	1	NOT
mmu-miR-6959-5p	-1.36861	0.455918	NOT
mmu-miR-6960-5p	0.875393	0.24576	NOT
mmu-miR-6961-3p	3.07309	0.281527	NOT
mmu-miR-6961-5p	-0.168612	1	NOT
mmu-miR-6962-3p	0.10082	1	NOT
mmu-miR-6962-5p	-2.75477	0.504549	NOT
mmu-miR-6963-3p	-0.952919	1	NOT
mmu-miR-6963-5p	0	1	NOT
mmu-miR-6964-3p	0.279524	1	NOT
mmu-miR-6964-5p	-1.97532	1	NOT
mmu-miR-6965-3p	0.648955	0.76299	NOT
mmu-miR-6966-3p	-1.03691	0.101934	NOT
mmu-miR-6966-5p	1.80143	1	NOT
mmu-miR-6967-3p	0.423675	0.733885	NOT
mmu-miR-6967-5p	0.25534	1	NOT
mmu-miR-6968-3p	2.0284	0.324594	NOT
mmu-miR-6968-5p	-3.25651	0.27091	NOT
mmu-miR-6970-3p	0.184926	0.866726	NOT
mmu-miR-6970-5p	1.49504	0.376751	NOT
mmu-miR-6971-3p	-2.12907	0.268277	NOT
mmu-miR-6972-3p	-0.143794	1	NOT
mmu-miR-6973a-3p	-1.93193	1	NOT
mmu-miR-6973b-3p	0	1	NOT
mmu-miR-6975-3p	-0.988885	0.489785	NOT
mmu-miR-6976-3p	-1.9321	1	NOT
mmu-miR-6976-5p	-0.721052	1	NOT
mmu-miR-6977-3p	-0.331607	0.834523	NOT
mmu-miR-6977-5p	1.78963	1	NOT
mmu-miR-6978-3p	1.55295	0.0998478	NOT
mmu-miR-6978-5p	1.78898	1	NOT
mmu-miR-6979-3p	0	1	NOT
mmu-miR-698-3p	-1.45702	0.643119	NOT
mmu-miR-6980-3p	0.437621	1	NOT
mmu-miR-6980-5p	2.24737	0.0759135	NOT
mmu-miR-6981-3p	1.78829	1	NOT
mmu-miR-6981-5p	1.80151	1	NOT
mmu-miR-6982-3p	2.57913	0.55624	NOT
mmu-miR-6983-3p	-0.195728	1	NOT
mmu-miR-6984-3p	-1.0716	0.706755	NOT
mmu-miR-6984-5p	-0.194449	1	NOT
mmu-miR-6985-3p	0.718907	0.5383	NOT
mmu-miR-6985-5p	3.97738	0.0478113	UP
mmu-miR-6986-5p	0.596239	0.337451	NOT
mmu-miR-6987-3p	-1.97497	1	NOT
mmu-miR-6987-5p	0	1	NOT
mmu-miR-6988-3p	0.107411	0.899801	NOT
mmu-miR-6988-5p	1.78835	1	NOT
mmu-miR-6989-3p	-0.0348627	1	NOT
mmu-miR-6989-5p	-2.7885	0.55624	NOT
mmu-miR-6990-5p	3.08611	0.282684	NOT
mmu-miR-6991-3p	3.45022	0.125023	NOT
mmu-miR-6991-5p	0	1	NOT
mmu-miR-6992-3p	0	1	NOT
mmu-miR-6992-5p	0	1	NOT
mmu-miR-6993-5p	-0.132284	1	NOT
mmu-miR-6994-3p	-0.718713	0.0468075	NOT
mmu-miR-6994-5p	1.49234	0.385149	NOT
mmu-miR-6995-3p	0.115615	1	NOT
mmu-miR-6995-5p	-0.179318	1	NOT
mmu-miR-6996-3p	-0.53933	1	NOT
mmu-miR-6996-5p	-2.75448	0.505127	NOT
mmu-miR-6997-3p	-0.00564382	1	NOT
mmu-miR-6997-5p	-1.81169	0.245075	NOT
mmu-miR-6998-3p	1.24909	0.343953	NOT
mmu-miR-6998-5p	-1.9751	1	NOT
mmu-miR-6999-3p	-1.93205	1	NOT
mmu-miR-700-3p	0.317425	0.0158324	NOT
mmu-miR-700-5p	-0.218811	0.0830471	NOT
mmu-miR-7001-3p	3.45385	0.213233	NOT
mmu-miR-7002-5p	-0.182543	1	NOT
mmu-miR-7003-5p	-1.99734	1	NOT
mmu-miR-7004-5p	-0.682542	1	NOT
mmu-miR-7005-3p	-2.6824	0.55624	NOT
mmu-miR-7005-5p	0	1	NOT
mmu-miR-7006-3p	1.81958	1	NOT
mmu-miR-7007-3p	-0.178591	1	NOT
mmu-miR-7007-5p	1.47969	0.410006	NOT
mmu-miR-7008-3p	-0.352091	0.709495	NOT
mmu-miR-7008-5p	1.54539	0.442583	NOT
mmu-miR-7009-3p	-0.705441	1	NOT
mmu-miR-7009-5p	0.936594	0.362576	NOT
mmu-miR-701-3p	-1.24412	0.0136053	DOWN
mmu-miR-701-5p	-0.815629	2.83296e-05	NOT
mmu-miR-7010-3p	-1.27724	0.179454	NOT
mmu-miR-7010-5p	-0.366258	0.334645	NOT
mmu-miR-7011-3p	2.54569	0.55624	NOT
mmu-miR-7012-3p	1.78675	1	NOT
mmu-miR-7012-5p	0.169259	1	NOT
mmu-miR-7013-3p	1.8079	0.249611	NOT
mmu-miR-7013-5p	1.31806	0.0502804	NOT
mmu-miR-7014-5p	-2.75651	0.506725	NOT
mmu-miR-7015-3p	0.496413	0.312208	NOT
mmu-miR-7015-5p	0.699798	0.765397	NOT
mmu-miR-7016-3p	-1.97526	1	NOT
mmu-miR-7016-5p	1.78709	1	NOT
mmu-miR-7017-3p	-2.75654	0.506465	NOT
mmu-miR-7017-5p	0.127974	1	NOT
mmu-miR-7018-3p	0.738794	0.741849	NOT
mmu-miR-7019-3p	-0.547263	0.641509	NOT
mmu-miR-7019-5p	-0.171085	1	NOT
mmu-miR-702-3p	0.776929	0.0924029	NOT
mmu-miR-702-5p	-0.695112	1	NOT
mmu-miR-7020-5p	-0.123112	1	NOT
mmu-miR-7021-3p	0.319398	1	NOT
mmu-miR-7021-5p	0.910475	0.0295791	NOT
mmu-miR-7022-3p	0	1	NOT
mmu-miR-7022-5p	-1.48727	0.650541	NOT
mmu-miR-7024-3p	3.07852	0.250023	NOT
mmu-miR-7024-5p	0.312865	1	NOT
mmu-miR-7025-3p	-0.0972336	0.832366	NOT
mmu-miR-7025-5p	1.8015	1	NOT
mmu-miR-7026-3p	-1.99734	1	NOT
mmu-miR-7026-5p	0.154965	0.874148	NOT
mmu-miR-7027-3p	2.57774	0.50275	NOT
mmu-miR-7027-5p	0	1	NOT
mmu-miR-7028-5p	1.80149	1	NOT
mmu-miR-7029-3p	0.527726	0.831959	NOT
mmu-miR-7030-3p	0.614662	1	NOT
mmu-miR-7030-5p	-0.143924	1	NOT
mmu-miR-7031-3p	0.634271	1	NOT
mmu-miR-7031-5p	2.30036	0.0399458	UP
mmu-miR-7032-3p	0.763356	0.460755	NOT
mmu-miR-7033-5p	0.423372	1	NOT
mmu-miR-7034-3p	-1.45877	0.640562	NOT
mmu-miR-7036a-3p	2.60937	0.55624	NOT
mmu-miR-7036a-5p	-0.720622	1	NOT
mmu-miR-7036b-3p	1.10663	0.646734	NOT
mmu-miR-7036b-5p	-0.207902	0.827449	NOT
mmu-miR-7037-5p	-0.688617	1	NOT
mmu-miR-7038-3p	-1.93244	1	NOT
mmu-miR-7038-5p	0.346937	1	NOT
mmu-miR-7039-5p	2.54569	0.55624	NOT
mmu-miR-704	-0.0334573	0.941336	NOT
mmu-miR-7040-3p	0	1	NOT
mmu-miR-7040-5p	-0.247237	1	NOT
mmu-miR-7041-5p	0.325836	1	NOT
mmu-miR-7042-3p	0.0445151	1	NOT
mmu-miR-7042-5p	2.25387	0.143913	NOT
mmu-miR-7043-3p	0.526839	0.0198771	NOT
mmu-miR-7043-5p	-1.00671	1	NOT
mmu-miR-7044-3p	-1.44521	0.100416	NOT
mmu-miR-7044-5p	-1.34947	0.519057	NOT
mmu-miR-7045-3p	2.57654	0.501192	NOT
mmu-miR-7046-3p	-0.560113	1	NOT
mmu-miR-7046-5p	-1.99734	1	NOT
mmu-miR-7047-3p	-1.93283	1	NOT
mmu-miR-7048-3p	-0.149925	1	NOT
mmu-miR-7049-5p	-0.523863	0.458323	NOT
mmu-miR-705	0	1	NOT
mmu-miR-7051-5p	-1.93372	1	NOT
mmu-miR-7052-3p	-0.168557	1	NOT
mmu-miR-7052-5p	-0.48202	1	NOT
mmu-miR-7054-3p	1.47116	0.41422	NOT
mmu-miR-7054-5p	0.105741	1	NOT
mmu-miR-7056-5p	0	1	NOT
mmu-miR-7057-3p	1.79781	0.010146	UP
mmu-miR-7057-5p	2.82673	0.0026739	UP
mmu-miR-7058-5p	-2.75657	0.506079	NOT
mmu-miR-7059-5p	0.268566	0.644422	NOT
mmu-miR-706	-1.4347	0.377398	NOT
mmu-miR-7061-3p	-0.122353	1	NOT
mmu-miR-7061-5p	-0.461579	0.325022	NOT
mmu-miR-7062-5p	0.695202	0.691526	NOT
mmu-miR-7063-3p	3.99275	0.0356441	UP
mmu-miR-7063-5p	-0.479334	0.69077	NOT
mmu-miR-7064-3p	-1.99734	1	NOT
mmu-miR-7064-5p	1.08441	0.697741	NOT
mmu-miR-7065-3p	-0.394516	1	NOT
mmu-miR-7065-5p	-1.99734	1	NOT
mmu-miR-7067-3p	-0.522735	1	NOT
mmu-miR-7068-3p	1.01454	0.496431	NOT
mmu-miR-7068-5p	-2.6824	0.55624	NOT
mmu-miR-7069-3p	2.57654	0.501077	NOT
mmu-miR-7069-5p	-1.39818	0.528573	NOT
mmu-miR-7070-3p	3.07852	0.250023	NOT
mmu-miR-7070-5p	2.60937	0.55624	NOT
mmu-miR-7071-5p	0.360576	1	NOT
mmu-miR-7073-5p	-0.506891	0.159651	NOT
mmu-miR-7074-3p	1.14278	0.16571	NOT
mmu-miR-7074-5p	-0.121604	1	NOT
mmu-miR-7075-3p	-0.19349	1	NOT
mmu-miR-7077-3p	1.78696	1	NOT
mmu-miR-7079-3p	-0.37317	0.535018	NOT
mmu-miR-708-3p	-0.636047	1e-06	NOT
mmu-miR-708-5p	-0.979666	1e-06	NOT
mmu-miR-7081-3p	3.45023	0.125023	NOT
mmu-miR-7082-3p	1.406	0.496234	NOT
mmu-miR-7083-3p	0.372474	1	NOT
mmu-miR-7083-5p	0.00448149	0.966661	NOT
mmu-miR-7084-3p	-0.182799	1	NOT
mmu-miR-7084-5p	-0.209466	0.844124	NOT
mmu-miR-7085-3p	-1.03938	0.713645	NOT
mmu-miR-7086-3p	0	1	NOT
mmu-miR-7087-5p	-1.11243	0.521294	NOT
mmu-miR-7089-3p	3.08553	0.275832	NOT
mmu-miR-7089-5p	0.616847	1	NOT
mmu-miR-709	-1.35989	0.500027	NOT
mmu-miR-7090-3p	0.694163	0.702884	NOT
mmu-miR-7090-5p	-1.00202	0.733372	NOT
mmu-miR-7091-3p	0.663844	0.561378	NOT
mmu-miR-7091-5p	-0.173861	0.687038	NOT
mmu-miR-7092-3p	-1.41832	0.1451	NOT
mmu-miR-7092-5p	-0.705526	0.155012	NOT
mmu-miR-7093-3p	-0.326856	0.687859	NOT
mmu-miR-7094-3p	1.78722	1	NOT
mmu-miR-7094b-2-5p	1.78747	1	NOT
mmu-miR-7115-5p	1.68936	0.0835949	NOT
mmu-miR-7116-3p	0.330053	1	NOT
mmu-miR-7116-5p	-1.93363	1	NOT
mmu-miR-7117-5p	0.616587	1	NOT
mmu-miR-7118-3p	-0.196586	1	NOT
mmu-miR-7119-5p	0	1	NOT
mmu-miR-712-3p	-0.233916	1	NOT
mmu-miR-712-5p	-0.0428945	1	NOT
mmu-miR-719	2.54569	0.55624	NOT
mmu-miR-7211-3p	0.701761	0.705095	NOT
mmu-miR-7211-5p	-0.216994	1	NOT
mmu-miR-7212-5p	-0.196643	1	NOT
mmu-miR-7213-3p	0.16961	1	NOT
mmu-miR-7213-5p	0.968126	0.0250744	NOT
mmu-miR-7219-3p	0.915272	0.0178181	NOT
mmu-miR-7219-5p	-1.99734	1	NOT
mmu-miR-7224-3p	0.578145	0.813282	NOT
mmu-miR-7224-5p	0	1	NOT
mmu-miR-7226-3p	0.205905	0.42697	NOT
mmu-miR-7227-3p	-0.986726	1	NOT
mmu-miR-7231-5p	-1.99734	1	NOT
mmu-miR-7235-3p	-0.203314	1	NOT
mmu-miR-7236-3p	0.749427	0.572619	NOT
mmu-miR-7237-3p	0.480001	0.73322	NOT
mmu-miR-7237-5p	1.81958	1	NOT
mmu-miR-7240-3p	-1.99734	1	NOT
mmu-miR-7240-5p	-2.78322	0.0435362	DOWN
mmu-miR-741-3p	1.27475	0.245758	NOT
mmu-miR-743a-5p	0	1	NOT
mmu-miR-743b-3p	3.45022	0.125023	NOT
mmu-miR-743b-5p	2.54569	0.55624	NOT
mmu-miR-744-3p	0.406599	0.072837	NOT
mmu-miR-744-5p	-0.171767	0.0904591	NOT
mmu-miR-758-3p	-0.0271071	1	NOT
mmu-miR-760-3p	0.569974	0.0124502	NOT
mmu-miR-760-5p	-1.97412	1	NOT
mmu-miR-764-3p	-0.198912	1	NOT
mmu-miR-764-5p	0.893247	0.020166	NOT
mmu-miR-7646-5p	0.32928	1	NOT
mmu-miR-7647-3p	3.12111	0.33436	NOT
mmu-miR-7647-5p	0.332727	1	NOT
mmu-miR-7648-3p	1.49358	0.376477	NOT
mmu-miR-7648-5p	-1.99734	1	NOT
mmu-miR-7649-3p	0.415248	0.703117	NOT
mmu-miR-7649-5p	0.989763	0.474073	NOT
mmu-miR-7650-5p	-0.96022	0.435277	NOT
mmu-miR-7651-5p	1.17342	0.206444	NOT
mmu-miR-7652-3p	-3.25251	0.269035	NOT
mmu-miR-7652-5p	-0.120861	1	NOT
mmu-miR-7653-3p	-1.29198	0.410257	NOT
mmu-miR-7653-5p	-0.369733	0.637212	NOT
mmu-miR-7654-3p	3.06694	0.27824	NOT
mmu-miR-7654-5p	0.624635	1	NOT
mmu-miR-7655-3p	0.668079	1	NOT
mmu-miR-7655-5p	1.11062	0.650245	NOT
mmu-miR-7656-3p	-1.99734	1	NOT
mmu-miR-7656-5p	0.352895	1	NOT
mmu-miR-7657-5p	0	1	NOT
mmu-miR-7658-3p	-0.701655	1	NOT
mmu-miR-7658-5p	0.927789	0.366988	NOT
mmu-miR-7659-5p	-0.354507	0.514412	NOT
mmu-miR-7660-3p	0	1	NOT
mmu-miR-7661-3p	-0.827078	0.269808	NOT
mmu-miR-7661-5p	4.38086	0.0209551	UP
mmu-miR-7662-3p	-0.0473952	1	NOT
mmu-miR-7662-5p	0	1	NOT
mmu-miR-7663-3p	-0.968923	1	NOT
mmu-miR-7664-3p	2.08485	0.192101	NOT
mmu-miR-7664-5p	1.13248	0.647623	NOT
mmu-miR-7665-5p	-2.7885	0.55624	NOT
mmu-miR-7666-3p	1.7877	1	NOT
mmu-miR-7667-3p	-0.121295	1	NOT
mmu-miR-7667-5p	1.84429	0.00452291	UP
mmu-miR-7668-3p	-0.224244	1	NOT
mmu-miR-7668-5p	-0.69834	0.342812	NOT
mmu-miR-7669-3p	-0.180526	1	NOT
mmu-miR-7669-5p	0.180077	0.891207	NOT
mmu-miR-7670-3p	-0.67925	0.489339	NOT
mmu-miR-7671-3p	1.81958	1	NOT
mmu-miR-7671-5p	-0.134156	1	NOT
mmu-miR-7672-3p	-0.177303	1	NOT
mmu-miR-7673-3p	0	1	NOT
mmu-miR-7673-5p	2.06417	0.0632059	NOT
mmu-miR-7674-3p	-0.956437	1	NOT
mmu-miR-7674-5p	3.44347	0.180384	NOT
mmu-miR-7675-3p	-0.588557	0.378637	NOT
mmu-miR-7675-5p	0	1	NOT
mmu-miR-7676-3p	0.318226	0.711984	NOT
mmu-miR-7676-5p	1.80162	1	NOT
mmu-miR-7677-3p	0.637264	0.623458	NOT
mmu-miR-7678-3p	-1.84761	0.380163	NOT
mmu-miR-7679-3p	2.18673	0.0358814	UP
mmu-miR-7679-5p	1.08852	0.591574	NOT
mmu-miR-7680-3p	0.0772643	1	NOT
mmu-miR-7680-5p	-3.2668	0.280958	NOT
mmu-miR-7682-3p	-1.97363	1	NOT
mmu-miR-7683-5p	-0.18302	1	NOT
mmu-miR-7685-3p	0.624323	1	NOT
mmu-miR-7685-5p	-0.442888	0.835054	NOT
mmu-miR-7687-3p	-0.216655	1	NOT
mmu-miR-7687-5p	2.02926	0.136604	NOT
mmu-miR-7688-5p	-0.107079	0.666356	NOT
mmu-miR-7689-3p	-0.3553	0.643968	NOT
mmu-miR-770-3p	-0.0811999	0.906858	NOT
mmu-miR-770-5p	-0.18785	1	NOT
mmu-miR-7a-1-3p	0.0574548	0.68342	NOT
mmu-miR-7a-2-3p	0	1	NOT
mmu-miR-7a-5p	-0.0425231	0.710351	NOT
mmu-miR-7b-3p	-1.93218	1	NOT
mmu-miR-7b-5p	-1.29376	1e-06	DOWN
mmu-miR-802-3p	4.20476	0.023654	UP
mmu-miR-802-5p	-0.693383	0.446126	NOT
mmu-miR-8091	0	1	NOT
mmu-miR-8092	3.08554	0.27587	NOT
mmu-miR-8094	0.721143	0.510955	NOT
mmu-miR-8096	0	1	NOT
mmu-miR-8097	0.0690701	1	NOT
mmu-miR-8100	0.662131	0.745947	NOT
mmu-miR-8101	1.77313	0.31176	NOT
mmu-miR-8103	0.858888	0.0116544	NOT
mmu-miR-8104	0	1	NOT
mmu-miR-8105	0.535013	0.776367	NOT
mmu-miR-8106	-2.60006	0.0801329	NOT
mmu-miR-8107	1.81952	1	NOT
mmu-miR-8111	0.424309	0.623668	NOT
mmu-miR-8112	0.405716	0.0313496	NOT
mmu-miR-8114	-0.373393	0.253345	NOT
mmu-miR-8116	-2.13661	0.230973	NOT
mmu-miR-8117	-0.178494	1	NOT
mmu-miR-8118	-0.42963	0.404036	NOT
mmu-miR-8120	0.143563	0.780534	NOT
mmu-miR-871-3p	4.38275	0.00810372	UP
mmu-miR-872-3p	-0.0556016	0.618678	NOT
mmu-miR-872-5p	-0.0520495	0.618002	NOT
mmu-miR-873a-3p	0.611828	1	NOT
mmu-miR-873a-5p	-0.803971	0.561106	NOT
mmu-miR-874-3p	-0.450737	0.00206218	NOT
mmu-miR-874-5p	-0.641951	0.340359	NOT
mmu-miR-875-5p	0.346531	1	NOT
mmu-miR-877-3p	0.621038	0.047388	NOT
mmu-miR-877-5p	0.772247	0.000103967	NOT
mmu-miR-878-3p	2.60937	0.55624	NOT
mmu-miR-878-5p	0	1	NOT
mmu-miR-879-3p	-1.54528	5.85607e-06	DOWN
mmu-miR-879-5p	0.332	0.0744342	NOT
mmu-miR-880-3p	2.41127	0.09926	NOT
mmu-miR-881-3p	4.86398	1e-06	UP
mmu-miR-883a-3p	2.57913	0.55624	NOT
mmu-miR-9-3p	0.172193	0.478433	NOT
mmu-miR-9-5p	0.507319	0.000519147	NOT
mmu-miR-92a-1-5p	-0.637049	0.00388561	NOT
mmu-miR-92a-3p	-0.279575	0.00497865	NOT
mmu-miR-92b-3p	-0.310883	0.00738099	NOT
mmu-miR-92b-5p	0.236987	0.130467	NOT
mmu-miR-93-3p	0.000724949	1	NOT
mmu-miR-93-5p	-0.00217168	0.983156	NOT
mmu-miR-935	1.04393	0.272048	NOT
mmu-miR-96-3p	-0.984345	0.0290508	NOT
mmu-miR-96-5p	-0.267093	0.00964102	NOT
mmu-miR-9769-3p	0.337687	0.433965	NOT
mmu-miR-98-3p	0.216317	0.215951	NOT
mmu-miR-98-5p	-0.140787	0.191884	NOT
mmu-miR-99a-3p	0.504247	0.00252913	NOT
mmu-miR-99a-5p	0.304288	0.00542639	NOT
mmu-miR-99b-3p	0.299671	0.00814762	NOT
mmu-miR-99b-5p	0.218114	0.0414797	NOT
