# Supplementary material for: Integrative Studies of Human Cord Blood Derived Mononuclear Cells and Umbilical Cord Derived Mesenchyme Stem Cells in Ameliorating Bronchopulmonary Dysplasia
Source: Front Cell Dev Biol. 2021 Nov 9;9:679866. doi: 10.3389/fcell.2021.679866 (PMC8631197; doi:10.3389/fcell.2021.679866)
Supplement: Supplementary file 4 [file Table_4.XLSX]

## Sheet: BPD VS MSC
running_number	logFC	Pvalue	regulation	chrom	start	end	strand	circBase	best gene	best transcript	gene source	uniprot	entrez	symbol	description	circRNA start ? ref exon start	circRNA end ? ref exon end	perfect exon/Intron info	F|T_BPD1 srpbm	F|T_BPD2 srpbm	F|T_BPD3 srpbm	G|T_BPDM1 srpbm	G|T_BPDM2 srpbm	G|T_BPDM3 srpbm	F|T_BPD1 count	F|T_BPD2 count	F|T_BPD3 count	G|T_BPDM1 count	G|T_BPDM2 count	G|T_BPDM3 count
CBT15_circR_303	3.84143	2.07675e-07	up	1	192337399	192337829	+	-	ENSMUSG00000058248	ENSMUST00000078470	ensembl_havana	Q3UHC9	16510	Kcnh1	potassium voltage-gated channel subfamily H member 1 [Source:HGNC Symbol;Acc:HGNC:6250]	exon start=circRNA start	exon end=circRNA end	192337400-192337829 exon:ENSMUSE00000483479	75.0023	136.621	99.7699	0	0	0	6	11	8	0	0	0
CBT15_circR_3837	-4.09400489827638	8.42451e-07	down	18	9437520	9438275	-	-	ENSMUSG00000024286	ENSMUST00000053917	ensembl	Q8BGU5	67974	Ccny	cyclin Y	transcript start<=circRNA start	transcript end>=circRNA end	-	0	0	0	100.723	105.08	63.714	0	0	0	8	8	5
CBT15_circR_3360	3.69163	1.19716e-06	up	17	50036940	50055627	-	-	ENSMUSG00000039316	ENSMUST00000044503	ensembl_havana	Q6A0D4	76438	Rftn1	Raftlin [Source:UniProtKB/Swiss-Prot;Acc:Q6A0D4]	exon start=circRNA start	exon end=circRNA end	50036941-50037056 exon:ENSMUSE00000313635|50047297-50047500 exon:ENSMUSE00001249456|50055237-50055627 exon:ENSMUSE00001227947	50.0015	149.041	74.8275	0	0	0	4	12	6	0	0	0
CBT15_circR_4346	3.61728	3.65645e-06	up	2	145858440	145861174	+	-	ENSMUSG00000001768	ENSMUST00000094480	ensembl	Q9D684	74030	Rin2	Ras and Rab interactor 2 [Source:MGI Symbol;Acc:MGI:1921280]	exon start=circRNA start	exon end=circRNA end	145858441-145858532 exon:ENSMUSE00001218368|145860014-145861174 exon:ENSMUSE00001310964	62.5019	149.041	62.3562	0	0	0	5	12	5	0	0	0
CBT15_circR_7103	2.87142	1.06683e-05	up	7	29225039	29225867	-	-	ENSMUSG00000046410	ENSMUST00000085818	ensembl_havana	Q3TQ68	52150	Kcnk6	potassium inwardly-rectifying channel, subfamily K, member 6 [Source:MGI Symbol;Acc:MGI:1891291]	exon start!=circRNA start	exon end=circRNA end	-	25.0008	62.1006	62.3562	0	0	0	2	5	5	0	0	0
CBT15_circR_7545	-3.235901501557	1.32743e-05	down	8	33796797	33797219	-	-	ENSMUSG00000031586	ENSMUST00000033994	havana	Q9WVB0	19663	Rbpms	RNA-binding protein with multiple splicing [Source:UniProtKB/Swiss-Prot;Acc:Q9WVB0]	transcript start<=circRNA start	transcript end>=circRNA end	-	0	24.8402	0	50.3614	52.5402	38.2284	0	2	0	4	4	3
CBT15_circR_6463	3.84732	1.58658e-05	up	6	115969875	115970248	-	mm9_circ_004960:circbase	ENSMUSG00000030123	ENSMUST00000015511	ensembl_havana	Q3UH93	67784	Plxnd1	plexin D1 [Source:MGI Symbol;Acc:MGI:2154244]	exon start=circRNA start	exon end=circRNA end	115969876-115969969 exon:ENSMUSE00000306698|115970159-115970248 exon:ENSMUSE00000306705	25.0008	124.201	187.069	0	0	0	2	10	15	0	0	0
CBT15_circR_1132	-3.22009703007244	1.44632e-05	down	11	21263198	21278060	+	mm9_circ_017735:circbase	ENSMUSG00000020128	ENSMUST00000006221	ensembl_havana	Q5SPW0	245944	Vps54	VPS54 GARP complex subunit [Source:MGI Symbol;Acc:MGI:2178798]	exon start=circRNA start	exon end=circRNA end	21263199-21263354 exon:ENSMUSE00000101001|21264630-21264871 exon:ENSMUSE00000101029|21268785-21268863 exon:ENSMUSE00000100994|21271704-21271738 exon:ENSMUSE00000100993|21274998-21275129 exon:ENSMUSE00000101000|21277675-21278060 exon:ENSMUSE00000101031	0	0	0	50.3614	39.4051	50.9712	0	0	0	4	3	4
CBT15_circR_2806	-4.02399339165078	1.78185e-05	down	15	82825230	82857284	-	mm9_circ_000890:circbase	ENSMUSG00000041852	ENSMUST00000048966	ensembl_havana	Q80U46	21411	Tcf20	transcription factor 20	exon start=circRNA start	exon end=circRNA end	82825231-82825324 exon:ENSMUSE00000647351|82851513-82857284 exon:ENSMUSE00000474361	0	49.6805	0	75.5421	118.215	63.714	0	4	0	6	9	5
CBT15_circR_687	-2.97013162759037	4.01202e-05	down	10	26327686	26352375	-	-	ENSMUSG00000039089	ENSMUST00000040219	ensembl	Q8BLB7	237339	L3mbtl3	Mus musculus L3MBTL3 histone methyl-lysine binding protein (L3mbtl3), transcript variant 3, mRNA. [Source:RefSeq mRNA;Acc:NM_001359254]	exon start=circRNA start	exon end=circRNA end	26327687-26327838 exon:ENSMUSE00000309489|26330175-26330266 exon:ENSMUSE00000309496|26331820-26331955 exon:ENSMUSE00000309643|26336233-26336337 exon:ENSMUSE00000309502|26337768-26337859 exon:ENSMUSE00000309507|26339219-26339303 exon:ENSMUSE00000309513|26340908-26341040 exon:ENSMUSE00000309519|26342508-26342667 exon:ENSMUSE00000309524|26344177-26344251 exon:ENSMUSE00000430822|26344612-26344723 exo…	0	0	0	37.7711	52.5402	25.4856	0	0	0	3	4	2
CBT15_circR_6313	-2.84080042743841	4.89144e-05	down	5	62698240	62730874	-	-	ENSMUSG00000037999	ENSMUST00000076623	ensembl_havana	E9QP44	212285	Arap2	ArfGAP with RhoGAP domain, ankyrin repeat and PH domain 2 [Source:HGNC Symbol;Acc:HGNC:16924]	exon start=circRNA start	exon end=circRNA end	62698241-62698419 exon:ENSMUSE00000258119|62706608-62706728 exon:ENSMUSE00000258130|62714733-62714802 exon:ENSMUSE00000258135|62730521-62730874 exon:ENSMUSE00000335713	0	0	0	37.7711	39.4051	25.4856	0	0	0	3	3	2
CBT15_circR_7773	-3.48668705068264	0.000187721	down	9	108024102	108032209	+	-	ENSMUSG00000093456	ENSMUST00000176454	havana	H3BK64,H3BKU8	-	Gm20662	-	exon start=circRNA start	exon end=circRNA end	108024103-108024450 exon:ENSMUSE00001256853|108031999-108032209 exon:ENSMUSE00001290317	0	49.6805	0	50.3614	39.4051	101.942	0	4	0	4	3	8
CBT15_circR_2393	2.54029	0.000211166	up	14	31482790	31487741	-	-	ENSMUSG00000021891	ENSMUST00000055303	ensembl_havana	Q8BVH9	67011	Mettl6	methyltransferase like 6	exon start=circRNA start	exon end=circRNA end	31482791-31482932 exon:ENSMUSE00000121655|31487571-31487741 exon:ENSMUSE00000121658	25.0008	74.5207	37.4137	0	0	0	2	6	3	0	0	0
CBT15_circR_846	2.70162	0.000212488	up	10	75274016	75279961	+	mm9_circ_003232:circbase	ENSMUSG00000033444	ENSMUST00000040105	ensembl	Q8C9Q9	74392	Specc1l	sperm antigen with calponin homology and coiled-coil domains 1-like	exon start=circRNA start	exon end=circRNA end	75274017-75274100 exon:ENSMUSE00000226642|75276771-75276927 exon:ENSMUSE00000226635|75279859-75279961 exon:ENSMUSE00000226629	37.5011	86.9408	37.4137	0	0	0	3	7	3	0	0	0
CBT15_circR_7009	2.69704	0.000289362	up	7	132759388	132760167	-	-	ENSMUSG00000030956	ENSMUST00000065371	ensembl_havana	Q8BGR5	77938	Fam53b	Mus musculus family with sequence similarity 53, member B (Fam53b), transcript variant 3, mRNA. [Source:RefSeq mRNA;Acc:NM_001347630]	exon start=circRNA start	exon end=circRNA end	132759389-132760167 exon:ENSMUSE00000300329	25.0008	99.3609	37.4137	0	0	0	2	8	3	0	0	0
CBT15_circR_1727	2.39344	0.000315307	up	12	3632809	3648389	+	mm9_circ_006216:circbase	ENSMUSG00000071454	ENSMUST00000077930	ensembl_havana	Q8C8Z9	13528	Dtnb	Dystrobrevin beta [Source:UniProtKB/Swiss-Prot;Acc:O70585]	exon start=circRNA start	exon end=circRNA end	3632810-3632964 exon:ENSMUSE00001272480|3643917-3644022 exon:ENSMUSE00001280989|3648223-3648389 exon:ENSMUSE00001297526	25.0008	49.6805	62.3562	0	0	0	2	4	5	0	0	0
CBT15_circR_6652	2.78049	0.000310373	up	6	35051061	35080226	-	-	ENSMUSG00000038784	ENSMUST00000044163	ensembl_havana	Q8BT14	53621	Cnot4	CCR4-NOT transcription complex subunit 4 [Source:UniProtKB/Swiss-Prot;Acc:Q8BT14]	exon start=circRNA start	exon end=circRNA end	35051062-35051559 exon:ENSMUSE00000285432|35052842-35053091 exon:ENSMUSE00000285439|35056211-35056268 exon:ENSMUSE00000285447|35064889-35065022 exon:ENSMUSE00000285458|35068588-35068713 exon:ENSMUSE00000285465|35069370-35069471 exon:ENSMUSE00000285470|35070217-35070303 exon:ENSMUSE00000285478|35077981-35078178 exon:ENSMUSE00000285485|35079961-35080226 exon:ENSMUSE00000285489	75.0023	74.5207	37.4137	0	0	0	6	6	3	0	0	0
CBT15_circR_990	-2.71685635954962	0.000454382	down	11	104350486	104378826	-	mm9_circ_006509:circbase	ENSMUSG00000018412	ENSMUST00000018556	havana	Q80TG1	76719	Kansl1	KAT8 regulatory NSL complex subunit 1 [Source:MGI Symbol;Acc:MGI:1923969]	exon start=circRNA start	exon end=circRNA end	104350487-104350652 exon:ENSMUSE00000222952|104356684-104356876 exon:ENSMUSE00000477977|104357481-104357596 exon:ENSMUSE00000222964|104368680-104368778 exon:ENSMUSE00000222969|104378685-104378826 exon:ENSMUSE00000222899	0	0	0	50.3614	26.2701	38.2284	0	0	0	4	2	3
CBT15_circR_1548	2.50938	0.0004423	up	11	98372069	98373570	+	-	ENSMUSG00000018167	ENSMUST00000154960	havana	Q61542	59045	Stard3	START domain containing 3 [Source:MGI Symbol;Acc:MGI:1929618]	exon start=circRNA start	exon end=circRNA end	98372070-98372342 exon:ENSMUSE00001302916|98373408-98373570 exon:ENSMUSE00000805129	25.0008	49.6805	74.8275	0	0	0	2	4	6	0	0	0
CBT15_circR_3422	-3.05982036505849	0.000507745	down	17	64624527	64625451	+	mm9_circ_006640:circbase	ENSMUSG00000024085	ENSMUST00000086723	ensembl_havana	Q8C4L1	17158	Man2a1	Alpha-mannosidase 2 [Source:UniProtKB/Swiss-Prot;Acc:P27046]	exon start=circRNA start	exon end=circRNA end	64624528-64624779 exon:ENSMUSE00000306920|64625307-64625451 exon:ENSMUSE00000306900	0	49.6805	0	25.1807	65.6752	38.2284	0	4	0	2	5	3
CBT15_circR_3728	1.9927	0.000558874	up	18	61967988	61978072	+	-	ENSMUSG00000045629	ENSMUST00000051720	ensembl	Q6DFU9	225608	Sh3tc2	SH3 domain and tetratricopeptide repeats 2	exon start=circRNA start	exon end=circRNA end	61967989-61968116 exon:ENSMUSE00000340004|61970942-61971047 exon:ENSMUSE00000401944|61973287-61973430 exon:ENSMUSE00000358532|61974449-61974647 exon:ENSMUSE00000356259|61975569-61975642 exon:ENSMUSE00000396900|61977877-61978072 exon:ENSMUSE00000333106	25.0008	49.6805	37.4137	0	0	0	2	4	3	0	0	0
CBT15_circR_202	-2.55425641694762	0.00059477	down	1	16440322	16509408	-	mm9_circ_006026:circbase	ENSMUSG00000025920	ENSMUST00000027052	ensembl_havana	Q8CJ67	29819	Stau2	staufen double-stranded RNA binding protein 2 [Source:MGI Symbol;Acc:MGI:1352508]	exon start=circRNA start	exon end=circRNA end	16440323-16440458 exon:ENSMUSE00001299794|16463035-16463194 exon:ENSMUSE00001343131|16509342-16509408 exon:ENSMUSE00001241858	0	0	0	25.1807	26.2701	50.9712	0	0	0	2	2	4
CBT15_circR_2869	2.54718	0.000578909	up	15	95948271	95949956	+	-	ENSMUSG00000064210	ENSMUST00000071874	ensembl_havana	Q6P9J9	105722	Ano6	anoctamin 6	exon start=circRNA start	exon end=circRNA end	95948272-95948497 exon:ENSMUSE00000275040|95949491-95949660 exon:ENSMUSE00000275079|95949859-95949956 exon:ENSMUSE00000275072	75.0023	49.6805	49.885	0	0	0	6	4	4	0	0	0
CBT15_circR_543	-3.28423524080444	0.000647346	down	1	91384564	91385346	-	mm9_circ_010373:circbase	ENSMUSG00000026309	ENSMUST00000027534	ensembl_havana	Q8R0F6	67444	Ilkap	Mus musculus integrin-linked kinase-associated serine/threonine phosphatase 2C (Ilkap), transcript variant 2, mRNA. [Source:RefSeq mRNA;Acc:NM_001355152]	exon start=circRNA start	exon end=circRNA end	91384565-91384658 exon:ENSMUSE00000157816|91385240-91385346 exon:ENSMUSE00000289057	0	37.2604	37.4137	100.723	65.6752	50.9712	0	3	3	8	5	4
CBT15_circR_4619	2.74383	0.000576583	up	2	28543553	28544386	+	-	ENSMUSG00000026821	ENSMUST00000028170	ensembl_havana	Q6ZPU1	19730	Ralgds	ral guanine nucleotide dissociation stimulator [Source:MGI Symbol;Acc:MGI:107485]	exon start=circRNA start	exon end=circRNA end	28543554-28543747 exon:ENSMUSE00001307002|28543989-28544386 exon:ENSMUSE00001253960	75.0023	49.6805	74.8275	0	0	0	6	4	6	0	0	0
CBT15_circR_4906	2.80604	0.000619699	up	3	106566044	106573841	+	-	ENSMUSG00000027900	ENSMUST00000029507	ensembl_havana	Q9CR48	67171	Dram2	DNA damage-regulated autophagy modulator protein 2 [Source:UniProtKB/Swiss-Prot;Acc:Q9CR48]	exon start=circRNA start	exon end!=circRNA end	-	75.0023	49.6805	87.2987	0	0	0	6	4	7	0	0	0
CBT15_circR_3766	-2.28409206789652	0.00101639	down	18	70580652	70594399	+	-	ENSMUSG00000024513	ENSMUST00000074058	ensembl_havana	Q9Z2E1	17191	Mbd2	Methyl-CpG-binding domain protein 2 [Source:UniProtKB/Swiss-Prot;Acc:Q9Z2E1]	exon start=circRNA start	exon end!=circRNA end	-	0	37.2604	0	25.1807	26.2701	25.4856	0	3	0	2	2	2
CBT15_circR_3056	2.61892	0.000896976	up	16	43609326	43610931	+	-	ENSMUSG00000022708	ENSMUST00000079441	ensembl	Q8K0L9	56490	Zbtb20	zinc finger and BTB domain containing 20 [Source:MGI Symbol;Acc:MGI:1929213]	exon start=circRNA start	exon end=circRNA end	43609327-43610931 exon:ENSMUSE00001282621	100.003	49.6805	49.885	0	0	0	8	4	4	0	0	0
CBT15_circR_8108	-1.30923135333451	0.0019893	down	9	66540061	66566903	-	mm9_circ_008057:circbase	ENSMUSG00000032376	ENSMUST00000034940	havana	Q91W36	235441	Usp3	ubiquitin specific peptidase 3 [Source:MGI Symbol;Acc:MGI:2152450]	exon start=circRNA start	exon end=circRNA end	66540062-66540175 exon:ENSMUSE00001300114|66542513-66542626 exon:ENSMUSE00001230123|66543946-66544028 exon:ENSMUSE00001236699|66545744-66545825 exon:ENSMUSE00001257611|66547872-66547955 exon:ENSMUSE00001209983|66562554-66562685 exon:ENSMUSE00001239994|66566843-66566903 exon:ENSMUSE00001263985	62.5019	136.621	124.712	176.265	183.891	242.113	5	11	10	14	14	19
CBT15_circR_1791	3.82995	0.00261143	up	12	51759218	51761170	-	mm9_circ_002888:circbase	ENSMUSG00000035247	ENSMUST00000042052	ensembl_havana	F8WIE5	207304	Hectd1	HECT domain E3 ubiquitin protein ligase 1	exon start=circRNA start	exon end=circRNA end	51759219-51759441 exon:ENSMUSE00000532314|51761014-51761170 exon:ENSMUSE00000532315	100.003	298.083	299.31	50.3614	0	0	8	24	24	4	0	0
CBT15_circR_2604	3.49938	0.0022637	up	15	12236017	12238019	+	-	ENSMUSG00000039458	ENSMUST00000038172	ensembl_havana	Q80TA6	268783	Mtmr12	Mus musculus myotubularin related protein 12 (Mtmr12), transcript variant 2, mRNA. [Source:RefSeq mRNA;Acc:NM_001356498]	exon start=circRNA start	exon end=circRNA end	12236018-12236148 exon:ENSMUSE00001262149|12237929-12238019 exon:ENSMUSE00001254355	0	173.882	162.126	0	0	0	0	14	13	0	0	0
CBT15_circR_5764	-2.97579838851838	0.00291659	down	4	8751323	8753148	+	-	ENSMUSG00000041235	ENSMUST00000039267	ensembl	A2AJK6	320790	Chd7	Chromodomain-helicase-DNA-binding protein 7 [Source:UniProtKB/Swiss-Prot;Acc:A2AJK6]	exon start=circRNA start	exon end=circRNA end	8751324-8753148 exon:ENSMUSE00000363418	0	49.6805	24.9425	113.313	39.4051	38.2284	0	4	2	9	3	3
CBT15_circR_6711	-3.09340965841251	0.00412042	down	6	47576535	47577667	-	mm9_circ_002148:circbase	ENSMUSG00000029687	ENSMUST00000081721	ensembl_havana	Q61188	14056	Ezh2	Histone-lysine N-methyltransferase EZH2 [Source:UniProtKB/Swiss-Prot;Acc:Q61188]	exon start=circRNA start	exon end=circRNA end	47576536-47576664 exon:ENSMUSE00001304807|47577544-47577667 exon:ENSMUSE00000486290	0	62.1006	0	50.3614	78.8103	76.4569	0	5	0	4	6	6
CBT15_circR_545	2.95248	0.00366911	up	1	92148255	92148494	-	mm9_circ_008885:circbase	ENSMUSG00000026313	ENSMUST00000097644	havana	Q6NZM9	208727	Hdac4	Histone deacetylase 4 [Source:UniProtKB/Swiss-Prot;Acc:Q6NZM9]	exon start=circRNA start	exon end=circRNA end	92148256-92148494 exon:ENSMUSE00001322781	0	124.201	99.7699	0	0	0	0	10	8	0	0	0
CBT15_circR_847	1.74961	0.00419476	up	10	75684291	75700095	-	mm9_circ_010009:circbase	ENSMUSG00000020196	ENSMUST00000001712	ensembl_havana	G3X8Q1	104248	Cabin1	calcineurin binding protein 1	exon start=circRNA start	exon end=circRNA end	75684292-75684405 exon:ENSMUSE00000642557|75694715-75695046 exon:ENSMUSE00000642558|75699913-75700095 exon:ENSMUSE00000642559	25.0008	49.6805	24.9425	0	0	0	2	4	2	0	0	0
CBT15_circR_2088	2.79842	0.00448185	up	13	37888870	37899787	+	mm9_circ_011756:circbase	ENSMUSG00000039087	ENSMUST00000037232	ensembl	Q3UH06	68750	Rreb1	Ras-responsive element-binding protein 1 [Source:UniProtKB/Swiss-Prot;Acc:Q3UH06]	exon start=circRNA start	exon end=circRNA end	37888871-37888972 exon:ENSMUSE00000616470|37892552-37892658 exon:ENSMUSE00000616469|37893772-37893984 exon:ENSMUSE00000683175|37898412-37898501 exon:ENSMUSE00001269182|37899624-37899787 exon:ENSMUSE00001260546	0	124.201	74.8275	0	0	0	0	10	6	0	0	0
CBT15_circR_3445	-2.54014816463498	0.00450606	down	17	67287390	67287932	-	-	ENSMUSG00000033278	ENSMUST00000037974	havana	P28828	19274	Ptprm	protein tyrosine phosphatase, receptor type, M	transcript start<=circRNA start	transcript end>=circRNA end	-	150.005	62.1006	37.4137	176.265	249.566	254.856	12	5	3	14	19	20
CBT15_circR_1614	2.75027	0.00485386	up	12	108157753	108165172	-	-	ENSMUSG00000056770	ENSMUST00000071095	ensembl_havana	Q91WC0	52690	Setd3	SET domain containing 3 [Source:MGI Symbol;Acc:MGI:1289184]	exon start=circRNA start	exon end=circRNA end	108157754-108158010 exon:ENSMUSE00001297102|108158276-108158348 exon:ENSMUSE00001282543|108160233-108160381 exon:ENSMUSE00001025376|108162973-108163065 exon:ENSMUSE00001049400|108165063-108165172 exon:ENSMUSE00001261230	0	86.9408	112.241	0	0	0	0	7	9	0	0	0
CBT15_circR_3527	1.67821	0.00587794	up	17	86809357	86809789	+	-	ENSMUSG00000024140	ENSMUST00000024954	ensembl	P97481	13819	Epas1	endothelial PAS domain protein 1	exon start=circRNA start	exon end=circRNA end	86809358-86809476 exon:ENSMUSE00000138654|86809584-86809789 exon:ENSMUSE00000138643	25.0008	37.2604	37.4137	0	0	0	2	3	3	0	0	0
CBT15_circR_1341	-2.83473320885279	0.00676426	down	11	6468650	6469089	+	-	ENSMUSG00000094483	ENSMUST00000179343	ensembl_havana	O35295	19291	Purb	purine rich element binding protein B [Source:MGI Symbol;Acc:MGI:1338779]	transcript start<=circRNA start	transcript end>=circRNA end	-	0	62.1006	0	50.3614	65.6752	50.9712	0	5	0	4	5	4
CBT15_circR_5656	2.56382	0.0060892	up	4	53127596	53133015	-	-	ENSMUSG00000015243	ENSMUST00000030010	ensembl_havana	Q8BPY1	11303	Abca1	ATP-binding cassette, sub-family A (ABC1), member 1 [Source:MGI Symbol;Acc:MGI:99607]	exon start=circRNA start	exon end=circRNA end	53127597-53127715 exon:ENSMUSE00000409749|53128721-53128862 exon:ENSMUSE00000226974|53132922-53133015 exon:ENSMUSE00000226982	0	111.781	62.3562	0	0	0	0	9	5	0	0	0
CBT15_circR_2666	2.51825	0.00615469	up	15	35770455	35770863	+	-	ENSMUSG00000037646	ENSMUST00000048646	ensembl_havana	E9QKX5	666173	Vps13b	vacuolar protein sorting 13B	exon start=circRNA start	exon end=circRNA end	35770456-35770863 exon:ENSMUSE00000624145	0	74.5207	87.2987	0	0	0	0	6	7	0	0	0
CBT15_circR_6688	2.51825	0.00615469	up	6	39165096	39173438	-	-	ENSMUSG00000042599	ENSMUST00000002305	ensembl_havana	Q3UWM4	338523	Kdm7a	Lysine-specific demethylase 7A [Source:UniProtKB/Swiss-Prot;Acc:Q3UWM4]	exon start=circRNA start	exon end=circRNA end	39165097-39165203 exon:ENSMUSE00000193884|39166667-39166754 exon:ENSMUSE00000193878|39168941-39169103 exon:ENSMUSE00000193888|39170124-39170310 exon:ENSMUSE00000193873|39170769-39170910 exon:ENSMUSE00000193876|39173278-39173438 exon:ENSMUSE00000193879	0	74.5207	87.2987	0	0	0	0	6	7	0	0	0
CBT15_circR_217	2.43862	0.00665107	up	1	165911287	165913349	-	-	ENSMUSG00000026565	ENSMUST00000069609	ensembl_havana	P25425	18986	Pou2f1	POU domain, class 2, transcription factor 1 [Source:UniProtKB/Swiss-Prot;Acc:P25425]	exon start=circRNA start	exon end=circRNA end	165911288-165911476 exon:ENSMUSE00001336318|165913227-165913349 exon:ENSMUSE00001345657	0	74.5207	74.8275	0	0	0	0	6	6	0	0	0
CBT15_circR_2667	2.60795	0.00679613	up	15	35792038	35794489	+	-	ENSMUSG00000037646	ENSMUST00000048646	ensembl_havana	E9QKX5	666173	Vps13b	vacuolar protein sorting 13B	exon start=circRNA start	exon end=circRNA end	35792039-35792241 exon:ENSMUSE00000624144|35793834-35794038 exon:ENSMUSE00000624143|35794305-35794489 exon:ENSMUSE00000624142	0	136.621	49.885	0	0	0	0	11	4	0	0	0
CBT15_circR_156	2.5848	0.00688558	up	1	155173985	155197435	+	mm9_circ_013647:circbase	ENSMUSG00000026470	ENSMUST00000027743	ensembl_havana	Q9JKK1	58244	Stx6	Syntaxin-6 [Source:UniProtKB/Swiss-Prot;Acc:Q9JKK1]	exon start=circRNA start	exon end=circRNA end	155173986-155174155 exon:ENSMUSE00000338321|155177854-155177948 exon:ENSMUSE00000277198|155187778-155187840 exon:ENSMUSE00000277193|155191429-155191554 exon:ENSMUSE00000159489|155193219-155193325 exon:ENSMUSE00000159490|155197341-155197435 exon:ENSMUSE00000159484	0	62.1006	124.712	0	0	0	0	5	10	0	0	0
CBT15_circR_8276	2.37063	0.00732244	up	X	102554883	102559734	-	-	ENSMUSG00000034055	ENSMUST00000043596	ensembl_havana	P18826	18679	Phka1	Phosphorylase b kinase regulatory subunit alpha, skeletal muscle isoform [Source:UniProtKB/Swiss-Prot;Acc:P18826]	exon start=circRNA start	exon end=circRNA end	102554884-102555023 exon:ENSMUSE00000284704|102555526-102555617 exon:ENSMUSE00001265280|102559565-102559734 exon:ENSMUSE00001244394	0	86.9408	62.3562	0	0	0	0	7	5	0	0	0
CBT15_circR_6286	2.36523	0.00800493	up	5	44532660	44541859	-	-	ENSMUSG00000039706	ENSMUST00000070748	ensembl_havana	O55203	16826	Ldb2	Mus musculus LIM domain binding 2 (Ldb2), transcript variant 5, mRNA. [Source:RefSeq mRNA;Acc:NM_001359070]	exon start=circRNA start	exon end=circRNA end	44532661-44532744 exon:ENSMUSE00000287674|44535038-44535160 exon:ENSMUSE00000287686|44541687-44541859 exon:ENSMUSE00000287696	0	99.3609	49.885	0	0	0	0	8	4	0	0	0
CBT15_circR_4104	2.58952	0.00844773	up	19	58263911	58270163	-	-	ENSMUSG00000025089	ENSMUST00000026076	havana	P97785	14585	Gfra1	GDNF family receptor alpha-1 [Source:UniProtKB/Swiss-Prot;Acc:P97785]	exon start=circRNA start	exon end=circRNA end	58263912-58264093 exon:ENSMUSE00000290394|58266999-58267133 exon:ENSMUSE00000290418|58270054-58270163 exon:ENSMUSE00000290445	75.0023	111.781	99.7699	0	0	25.4856	6	9	8	0	0	2
CBT15_circR_4450	2.79413	0.00861821	up	2	163636810	163639327	-	-	ENSMUSG00000017707	ENSMUST00000017851	ensembl_havana	Q9QZI9	26943	Serinc3	Serine incorporator 3 [Source:UniProtKB/Swiss-Prot;Acc:Q9QZI9]	exon start=circRNA start	exon end=circRNA end	163636811-163637004 exon:ENSMUSE00000171572|163639166-163639327 exon:ENSMUSE00001252910	87.5027	136.621	49.885	25.1807	0	0	7	11	4	2	0	0
CBT15_circR_8230	2.29993	0.00823787	up	9	96340201	96345893	-	-	ENSMUSG00000032412	ENSMUST00000034983	ensembl_havana	P97370	11933	Atp1b3	Sodium/potassium-transporting ATPase subunit beta-3 [Source:UniProtKB/Swiss-Prot;Acc:P97370]	exon start=circRNA start	exon end=circRNA end	96340202-96340386 exon:ENSMUSE00000219563|96343268-96343375 exon:ENSMUSE00000518338|96345765-96345893 exon:ENSMUSE00000219565	0	62.1006	74.8275	0	0	0	0	5	6	0	0	0
CBT15_circR_459	2.25752	0.00886394	up	1	66801048	66807604	-	mm9_circ_000550:circbase	ENSMUSG00000026004	ENSMUST00000132960	havana	Q5DTI6	68691	Kansl1l	Mus musculus KAT8 regulatory NSL complex subunit 1-like (Kansl1l), transcript variant 3, mRNA. [Source:RefSeq mRNA;Acc:NM_001357156]	exon start=circRNA start	exon end=circRNA end	66801049-66802168 exon:ENSMUSE00001267248|66807525-66807604 exon:ENSMUSE00000742275	0	86.9408	49.885	0	0	0	0	7	4	0	0	0
CBT15_circR_5187	3.02917	0.0106373	up	3	89001772	89007877	+	mm9_circ_009027:circbase	ENSMUSG00000028053	ENSMUST00000090933	ensembl	Q99MY8	192195	Ash1l	Histone-lysine N-methyltransferase ASH1L [Source:UniProtKB/Swiss-Prot;Acc:Q99MY8]	exon start=circRNA start	exon end=circRNA end	89001773-89001874 exon:ENSMUSE00000567020|89007142-89007877 exon:ENSMUSE00000567019	25.0008	149.041	174.597	0	39.4051	0	2	12	14	0	3	0
CBT15_circR_3638	2.14406	0.00988182	up	18	42320763	42324198	+	-	ENSMUSG00000024491	ENSMUST00000046972	ensembl	Q5SFM8	225432	Rbm27	RNA binding motif protein 27	exon start=circRNA start	exon end=circRNA end	42320764-42320917 exon:ENSMUSE00000507853|42324055-42324198 exon:ENSMUSE00000505772	0	62.1006	62.3562	0	0	0	0	5	5	0	0	0
CBT15_circR_1418	2.57693	0.00923985	up	11	75751880	75759428	+	-	ENSMUSG00000020849	ENSMUST00000067664	ensembl_havana	Q5SS40	22627	Ywhae	tyrosine 3-monooxygenase/tryptophan 5-monooxygenase activation protein, epsilon polypeptide [Source:MGI Symbol;Acc:MGI:894689]	exon start=circRNA start	exon end=circRNA end	75751881-75752080 exon:ENSMUSE00001240635|75755574-75755680 exon:ENSMUSE00001215764|75756817-75757023 exon:ENSMUSE00001281723|75759292-75759428 exon:ENSMUSE00001310196	50.0015	37.2604	162.126	0	0	0	4	3	13	0	0	0
CBT15_circR_1373	2.02912	0.0116996	up	11	69735233	69735530	+	-	ENSMUSG00000005198	ENSMUST00000058470	havana	P08775	20020	Polr2a	DNA-directed RNA polymerase II subunit RPB1 [Source:UniProtKB/Swiss-Prot;Acc:P08775]	transcript start<=circRNA start	transcript end>=circRNA end	-	0	62.1006	49.885	0	0	0	0	5	4	0	0	0
CBT15_circR_7703	2.02912	0.0116996	up	8	86665690	86673069	+	-	ENSMUSG00000047866	ENSMUST00000034141	ensembl_havana	Q9DBN5	66887	Lonp2	Lon protease homolog 2, peroxisomal [Source:UniProtKB/Swiss-Prot;Acc:Q9DBN5]	exon start=circRNA start	exon end=circRNA end	86665691-86665841 exon:ENSMUSE00001290646|86667713-86667839 exon:ENSMUSE00000441917|86672936-86673069 exon:ENSMUSE00000441910	0	62.1006	49.885	0	0	0	0	5	4	0	0	0
CBT15_circR_4138	-3.49645056569188	0.0112377	down	19	9005874	9006246	+	-	ENSMUSG00000069833	ENSMUST00000092955	ensembl	Q8BRB8	66395	Ahnak	AHNAK nucleoprotein (desmoyokin)	transcript start<=circRNA start	transcript end>=circRNA end	-	0	0	0	176.265	183.891	0	0	0	0	14	14	0
CBT15_circR_3694	1.14929	0.0100848	up	18	56807663	56812075	-	-	ENSMUSG00000032656	ENSMUST00000102912	ensembl_havana	Q8BRX9	320253	March3	E3 ubiquitin-protein ligase MARCH3 [Source:UniProtKB/Swiss-Prot;Acc:Q8BRX9]	exon start=circRNA start	exon end=circRNA end	56807664-56807868 exon:ENSMUSE00000222217|56811832-56812075 exon:ENSMUSE00001307019	237.507	434.704	249.425	88.1325	105.08	89.1997	19	35	20	7	8	7
CBT15_circR_8323	1.37161	0.0134855	up	X	142752039	142834393	+	mm9_circ_004752:circbase	ENSMUSG00000047045	ENSMUST00000112889	havana	Q6PHN7	209497	Tmem164	transmembrane protein 164 [Source:MGI Symbol;Acc:MGI:2148020]	exon start=circRNA start	exon end=circRNA end	142752040-142752089 exon:ENSMUSE00001258611|142770967-142771033 exon:ENSMUSE00001274686|142805990-142806068 exon:ENSMUSE00001228961|142832501-142832601 exon:ENSMUSE00001229168|142834185-142834393 exon:ENSMUSE00001300899	75.0023	198.722	199.54	25.1807	65.6752	38.2284	6	16	16	2	5	3
CBT15_circR_1391	-3.96748187551961	0.0112373	down	11	72659599	72659752	-	-	ENSMUSG00000020794	ENSMUST00000021148	ensembl_havana	Q5F239	67128	Ube2g1	ubiquitin-conjugating enzyme E2G 1 [Source:MGI Symbol;Acc:MGI:1914378]	transcript start<=circRNA start	transcript end>=circRNA end	-	0	0	0	314.759	275.836	0	0	0	0	25	21	0
CBT15_circR_7698	1.47603	0.00797694	up	8	8639205	8639489	-	-	ENSMUSG00000001300	ENSMUST00000001319	ensembl_havana	Q4FJM3	13642	Efnb2	Ephrin-B2 [Source:UniProtKB/Swiss-Prot;Acc:P52800]	exon start=circRNA start	exon end=circRNA end	8639206-8639489 exon:ENSMUSE00000147334	400.012	1018.45	972.757	88.1325	367.781	216.628	32	82	78	7	28	17
CBT15_circR_4989	1.4946	0.0149834	up	3	142828880	142853714	-	-	ENSMUSG00000004591	ENSMUST00000043812	ensembl_havana	Q8BWW9	109333	Pkn2	Serine/threonine-protein kinase N2 [Source:UniProtKB/Swiss-Prot;Acc:Q8BWW9]	exon start=circRNA start	exon end=circRNA end	142828881-142829094 exon:ENSMUSE00001211528|142829184-142829329 exon:ENSMUSE00001269049|142830497-142830614 exon:ENSMUSE00001257219|142839208-142839362 exon:ENSMUSE00001216064|142853414-142853714 exon:ENSMUSE00001309758	25.0008	37.2604	24.9425	0	0	0	2	3	2	0	0	0
CBT15_circR_3027	-2.54395269127925	0.0155231	down	16	34922180	34922360	-	-	ENSMUSG00000022836	ENSMUST00000023538	ensembl_havana	B1B1A8	107589	Mylk	myosin light chain kinase [Source:HGNC Symbol;Acc:HGNC:7590]	transcript start<=circRNA start	transcript end>=circRNA end	-	0	0	0	62.9518	78.8103	0	0	0	0	5	6	0
CBT15_circR_8403	2.82876	0.0171583	up	X	69544408	69545269	+	mm9_circ_006013:circbase	ENSMUSG00000031189	ENSMUST00000033532	ensembl_havana	O55112	14266	Aff2	AF4/FMR2 family member 2 [Source:UniProtKB/Swiss-Prot;Acc:O55112]	exon start=circRNA start	exon end=circRNA end	69544409-69545269 exon:ENSMUSE00001244262	100.003	372.604	124.712	37.7711	0	25.4856	8	30	10	3	0	2
CBT15_circR_6536	2.16087	0.0151871	up	6	129180632	129184313	+	-	ENSMUSG00000030157	ENSMUST00000032260	ensembl_havana	Q91V08	93694	Clec2d	C-type lectin domain family 2 member D [Source:UniProtKB/Swiss-Prot;Acc:Q91V08]	exon start!=circRNA start	exon end=circRNA end	-	37.5011	86.9408	0	0	0	0	3	7	0	0	0	0
CBT15_circR_3559	2.10135	0.0153267	up	18	21010676	21020999	+	-	ENSMUSG00000024317	ENSMUST00000052396	ensembl	Q9CQE0	56515	Rnf138	ring finger protein 138	exon start=circRNA start	exon end=circRNA end	21010677-21010792 exon:ENSMUSE00000140846|21017819-21017875 exon:ENSMUSE00000140848|21020888-21020999 exon:ENSMUSE00000140847	37.5011	74.5207	0	0	0	0	3	6	0	0	0	0
CBT15_circR_5056	2.05303	0.016091	up	3	30237977	30238321	-	-	ENSMUSG00000027684	ENSMUST00000172697	havana	G3UZ13	14013	Mecom	MDS1 and EVI1 complex locus [Source:MGI Symbol;Acc:MGI:95457]	exon start=circRNA start	exon end=circRNA end	30237978-30238321 exon:ENSMUSE00001266285	25.0008	86.9408	0	0	0	0	2	7	0	0	0	0
CBT15_circR_7570	1.88858	0.0165805	up	8	41076231	41084840	-	-	ENSMUSG00000045636	ENSMUST00000059115	ensembl	A0A0R4J1L9	102103	Mtus1	mitochondrial tumor suppressor 1 [Source:MGI Symbol;Acc:MGI:2142572]	exon start=circRNA start	exon end=circRNA end	41076232-41076427 exon:ENSMUSE00000426060|41082614-41084840 exon:ENSMUSE00000426067	25.0008	62.1006	0	0	0	0	2	5	0	0	0	0
CBT15_circR_5452	-2.39853742034932	0.0180292	down	4	132689704	132707123	+	mm9_circ_014586:circbase	ENSMUSG00000028886	ENSMUST00000020197	ensembl	P97480	14050	Eya3	Eyes absent homolog 3 [Source:UniProtKB/Swiss-Prot;Acc:P97480]	exon start=circRNA start	exon end=circRNA end	132689705-132689790 exon:ENSMUSE00001261526|132692962-132693145 exon:ENSMUSE00001239009|132694747-132694883 exon:ENSMUSE00001371993|132699030-132699113 exon:ENSMUSE00001262424|132701021-132701110 exon:ENSMUSE00001294790|132704352-132704410 exon:ENSMUSE00001226025|132706963-132707123 exon:ENSMUSE00001247842	0	24.8402	0	75.5421	52.5402	0	0	2	0	6	4	0
CBT15_circR_2269	-2.40928697396246	0.0183384	down	14	101892467	101892723	-	-	ENSMUSG00000033060	ENSMUST00000100337	ensembl_havana	Q6ZQ32	380928	Lmo7	Mus musculus LIM domain only 7 (Lmo7), transcript variant 2, mRNA. [Source:RefSeq mRNA;Acc:NM_001347628]	transcript start<=circRNA start	transcript end>=circRNA end	-	0	0	0	0	52.5402	76.4569	0	0	0	0	4	6
CBT15_circR_3276	2.25996	0.0167504	up	17	30135322	30192730	+	-	ENSMUSG00000044477	ENSMUST00000057897	ensembl_havana	Q497H0	21769	Zfand3	zinc finger, AN1-type domain 3	exon start=circRNA start	exon end=circRNA end	30135323-30135505 exon:ENSMUSE00000657864|30192563-30192730 exon:ENSMUSE00000441000	25.0008	124.201	0	0	0	0	2	10	0	0	0	0
CBT15_circR_7975	2.11658	0.0172818	up	9	46030607	46030834	-	-	ENSMUSG00000034135	ENSMUST00000120247	havana	Q6P4S6	70661	Sik3	SIK family kinase 3 [Source:HGNC Symbol;Acc:HGNC:29165]	transcript start<=circRNA start	transcript end>=circRNA end	-	62.5019	62.1006	0	0	0	0	5	5	0	0	0	0
CBT15_circR_3463	1.84282	0.0175158	up	17	73906009	73907745	-	-	ENSMUSG00000024066	ENSMUST00000024866	ensembl	Q00519	22436	Xdh	xanthine dehydrogenase	exon start=circRNA start	exon end=circRNA end	73906010-73906096 exon:ENSMUSE00000230247|73906204-73906291 exon:ENSMUSE00000230268|73906695-73906828 exon:ENSMUSE00000230286|73907621-73907745 exon:ENSMUSE00000230305	37.5011	24.8402	49.885	0	0	0	3	2	4	0	0	0
CBT15_circR_7870	-2.33597583752476	0.0194236	down	9	20497665	20498160	-	-	ENSMUSG00000097469	ENSMUST00000180846	ensembl	-	-	Gm26733	predicted gene, 26733 [Source:MGI Symbol;Acc:MGI:5477227]	transcript start<=circRNA start	transcript end>=circRNA end	-	0	0	0	62.9518	0	50.9712	0	0	0	5	0	4
CBT15_circR_6375	1.90899	0.0176121	up	5	73510885	73534697	+	-	ENSMUSG00000051674	ENSMUST00000063882	ensembl_havana	Q8CCA0	100737	Dcun1d4	DCN1-like protein 4 [Source:UniProtKB/Swiss-Prot;Acc:Q8CCA0]	exon start=circRNA start	exon end=circRNA end	73510886-73510956 exon:ENSMUSE00001308404|73511127-73511166 exon:ENSMUSE00001283052|73520116-73520230 exon:ENSMUSE00001228245|73522653-73522744 exon:ENSMUSE00001260001|73531504-73531574 exon:ENSMUSE00001218861|73534606-73534697 exon:ENSMUSE00001283177	37.5011	24.8402	62.3562	0	0	0	3	2	5	0	0	0
CBT15_circR_4472	2.16813	0.0205615	up	2	166834470	166836457	+	-	ENSMUSG00000074582	ENSMUST00000099078	ensembl_havana	A2A5R2	99371	Arfgef2	Brefeldin A-inhibited guanine nucleotide-exchange protein 2 [Source:UniProtKB/Swiss-Prot;Acc:A2A5R2]	exon start=circRNA start	exon end=circRNA end	166834471-166834617 exon:ENSMUSE00000639107|166835613-166835792 exon:ENSMUSE00000639106|166836202-166836457 exon:ENSMUSE00000639105	50.0015	62.1006	49.885	25.1807	0	0	4	5	4	2	0	0
CBT15_circR_1649	-1.97767810327139	0.0207127	down	12	111776811	111778700	+	-	ENSMUSG00000021288	ENSMUST00000084941	ensembl_havana	Q7M702	16593	Klc1	kinesin light chain 1 isoform 1G [Source:RefSeq peptide;Acc:NP_001020533]	exon start=circRNA start	exon end=circRNA end	111776812-111777037 exon:ENSMUSE00000116454|111778020-111778107 exon:ENSMUSE00000116451|111778599-111778700 exon:ENSMUSE00000116450	0	0	0	37.7711	39.4051	0	0	0	0	3	3	0
CBT15_circR_4907	-1.97767810327139	0.0207127	down	3	106566044	106575897	+	-	ENSMUSG00000027900	ENSMUST00000029507	ensembl_havana	Q9CR48	67171	Dram2	DNA damage-regulated autophagy modulator protein 2 [Source:UniProtKB/Swiss-Prot;Acc:Q9CR48]	exon start=circRNA start	exon end!=circRNA end	-	0	0	0	37.7711	39.4051	0	0	0	0	3	3	0
CBT15_circR_3907	2.41912	0.0186466	up	19	30039063	30039297	+	mm9_circ_016872:circbase	ENSMUSG00000024817	ENSMUST00000025739	ensembl_havana	Q7TMI3	109113	Uhrf2	ubiquitin-like, containing PHD and RING finger domains 2 [Source:MGI Symbol;Acc:MGI:1923718]	exon start=circRNA start	exon end=circRNA end	30039064-30039297 exon:ENSMUSE00001228888	0	186.302	37.4137	0	0	0	0	15	3	0	0	0
CBT15_circR_5350	-2.60698965324951	0.0205967	down	4	121182605	121190258	-	mm9_circ_018293:circbase	ENSMUSG00000049878	ENSMUST00000056635	havana	E9Q532	109263	Rlf	Mus musculus rearranged L-myc fusion sequence (Rlf), mRNA. [Source:RefSeq mRNA;Acc:NM_001346660]	exon start=circRNA start	exon end=circRNA end	121182606-121182738 exon:ENSMUSE00000599745|121188215-121188296 exon:ENSMUSE00000669269|121190104-121190258 exon:ENSMUSE00000669271	50.0015	0	62.3562	125.904	91.9453	140.171	4	0	5	10	7	11
CBT15_circR_7301	-2.10141102435814	0.0208232	down	7	98626465	98637520	-	-	ENSMUSG00000035401	ENSMUST00000038359	havana	Q8BMB0	233545	Emsy	BRCA2-interacting transcriptional repressor EMSY [Source:UniProtKB/Swiss-Prot;Acc:Q8BMB0]	exon start=circRNA start	exon end=circRNA end	98626466-98626720 exon:ENSMUSE00000371161|98630131-98630407 exon:ENSMUSE00000380429|98637261-98637520 exon:ENSMUSE00000337067	0	24.8402	0	0	52.5402	38.2284	0	2	0	0	4	3
CBT15_circR_4319	-4.08539194167118	0.0146532	down	2	135662745	135669785	-	-	ENSMUSG00000039943	ENSMUST00000134310	havana	Q91UZ1	18798	Plcb4	phospholipase C, beta 4 [Source:MGI Symbol;Acc:MGI:107464]	transcript start<=circRNA start	transcript end>=circRNA end	-	0	0	0	0	328.376	573.426	0	0	0	0	25	45
CBT15_circR_5644	-2.01337198817139	0.0213172	down	4	47383748	47396585	+	-	ENSMUSG00000007613	ENSMUST00000007757	ensembl_havana	Q64729	21812	Tgfbr1	transforming growth factor, beta receptor I [Source:MGI Symbol;Acc:MGI:98728]	exon start=circRNA start	exon end=circRNA end	47383749-47383994 exon:ENSMUSE00001285304|47393247-47393489 exon:ENSMUSE00000230734|47396355-47396585 exon:ENSMUSE00000527316	0	0	0	37.7711	0	38.2284	0	0	0	3	0	3
CBT15_circR_2847	-2.64633645367116	0.0208049	down	15	89547625	89549882	+	-	ENSMUSG00000022623	ENSMUST00000039074	ensembl	Q4ACU6	58234	Shank3	SH3 and multiple ankyrin repeat domains protein 3 [Source:UniProtKB/Swiss-Prot;Acc:Q4ACU6]	exon start=circRNA start	exon end=circRNA end	89547626-89549882 exon:ENSMUSE00000381401	0	37.2604	24.9425	50.3614	118.215	0	0	3	2	4	9	0
CBT15_circR_6567	-2.11897316554013	0.0217632	down	6	141459055	141466241	+	-	ENSMUSG00000041741	ENSMUST00000043259	ensembl_havana	B2RR84	54611	Pde3a	phosphodiesterase 3A, cGMP inhibited [Source:MGI Symbol;Acc:MGI:1860764]	exon start=circRNA start	exon end=circRNA end	141459056-141459310 exon:ENSMUSE00000298586|141459684-141459838 exon:ENSMUSE00000298579|141466117-141466241 exon:ENSMUSE00000298572	0	24.8402	0	37.7711	0	50.9712	0	2	0	3	0	4
CBT15_circR_1676	-2.34425291155153	0.024515	down	12	13482385	13484044	+	-	ENSMUSG00000020576	ENSMUST00000042953	ensembl_havana	Q6GQV6	71169	Nbas	neuroblastoma amplified sequence	exon start=circRNA start	exon end=circRNA end	13482386-13482636 exon:ENSMUSE00000372392|13483710-13484044 exon:ENSMUSE00000394794	0	37.2604	74.8275	50.3614	78.8103	63.714	0	3	6	4	6	5
CBT15_circR_6297	-1.95316649876914	0.0223379	down	5	48256756	48283518	+	-	ENSMUSG00000031558	ENSMUST00000033967	havana	Q9R1B9	20563	Slit2	slit guidance ligand 2 [Source:MGI Symbol;Acc:MGI:1315205]	exon start=circRNA start	exon end=circRNA end	48256757-48256881 exon:ENSMUSE00001277274|48257006-48257103 exon:ENSMUSE00001300726|48259544-48259683 exon:ENSMUSE00001257710|48275582-48275675 exon:ENSMUSE00001263442|48281717-48281854 exon:ENSMUSE00001293971|48281945-48282185 exon:ENSMUSE00001254240|48283388-48283518 exon:ENSMUSE00001235598	0	0	0	0	52.5402	25.4856	0	0	0	0	4	2
CBT15_circR_3675	-1.83349378181045	0.0227333	down	18	53473420	53552389	+	-	ENSMUSG00000069378	ENSMUST00000091900	ensembl	Q3UZD5	225518	Prdm6	PR domain containing 6	exon start=circRNA start	exon end=circRNA end	53473421-53473728 exon:ENSMUSE00001261052|53536612-53536739 exon:ENSMUSE00000572488|53540198-53540322 exon:ENSMUSE00000572487|53552047-53552389 exon:ENSMUSE00001237513	0	0	0	0	39.4051	25.4856	0	0	0	0	3	2
CBT15_circR_5722	-1.83349378181045	0.0227333	down	4	8169595	8221674	-	-	ENSMUSG00000041261	ENSMUST00000066674	ensembl_havana	P28651	12319	Car8	Carbonic anhydrase-related protein [Source:UniProtKB/Swiss-Prot;Acc:P28651]	exon start=circRNA start	exon end=circRNA end	8169596-8169765 exon:ENSMUSE00000440278|8183253-8183365 exon:ENSMUSE00000253653|8184584-8184632 exon:ENSMUSE00000253659|8185576-8185638 exon:ENSMUSE00000253666|8189297-8189392 exon:ENSMUSE00000253674|8221550-8221674 exon:ENSMUSE00000253681	0	0	0	0	39.4051	25.4856	0	0	0	0	3	2
CBT15_circR_4792	-1.93623062310228	0.0227826	down	2	72406978	72407411	+	-	ENSMUSG00000004085	ENSMUST00000090824	ensembl_havana	Q9ESL4	65964	Map3k20	Mitogen-activated protein kinase kinase kinase 20 [Source:UniProtKB/Swiss-Prot;Acc:Q9ESL4]	transcript start<=circRNA start	transcript end>=circRNA end	-	0	0	0	25.1807	52.5402	0	0	0	0	2	4	0
CBT15_circR_3195	-1.86773406064375	0.0229169	down	17	15405754	15417725	+	-	ENSMUSG00000014763	ENSMUST00000055352	ensembl	Q6RI63	67544	Fam120b	family with sequence similarity 120, member B	exon start=circRNA start	exon end=circRNA end	15405755-15405935 exon:ENSMUSE00000658218|15407597-15407698 exon:ENSMUSE00000135939|15414679-15414851 exon:ENSMUSE00000135942|15417633-15417725 exon:ENSMUSE00000135948	0	0	0	37.7711	0	25.4856	0	0	0	3	0	2
CBT15_circR_3548	-1.86773406064375	0.0229169	down	18	13715140	13717747	-	-	ENSMUSG00000024420	ENSMUST00000025288	ensembl	Q6KAS7	225207	Zfp521	zinc finger protein 521	exon start=circRNA start	exon end=circRNA end	13715141-13715256 exon:ENSMUSE00000573184|13717616-13717747 exon:ENSMUSE00000573185	0	0	0	37.7711	0	25.4856	0	0	0	3	0	2
CBT15_circR_4569	-1.86773406064375	0.0229169	down	2	20859880	20861110	-	-	ENSMUSG00000036591	ENSMUST00000173784	havana	Q6DFV3	71435	Arhgap21	Rho GTPase activating protein 21 [Source:MGI Symbol;Acc:MGI:1918685]	exon start=circRNA start	exon end=circRNA end	20859881-20860036 exon:ENSMUSE00001292854|20860304-20860446 exon:ENSMUSE00001299115|20860971-20861110 exon:ENSMUSE00000940969	0	0	0	37.7711	0	25.4856	0	0	0	3	0	2
CBT15_circR_5813	-1.86773406064375	0.0229169	down	5	100805897	100812202	-	mm9_circ_001838:circbase	ENSMUSG00000035234	ENSMUST00000117364	ensembl	Q8BPZ8	70681	Abraxas1	BRCA1 A complex subunit [Source:MGI Symbol;Acc:MGI:1917931]	exon start=circRNA start	exon end=circRNA end	100805898-100806489 exon:ENSMUSE00001210662|100806779-100806890 exon:ENSMUSE00001252666|100809559-100809643 exon:ENSMUSE00000327281|100809756-100809875 exon:ENSMUSE00001287209|100812009-100812202 exon:ENSMUSE00001221525	0	0	0	37.7711	0	25.4856	0	0	0	3	0	2
CBT15_circR_4172	-2.212942410737	0.0230383	down	2	104433167	104435057	-	-	ENSMUSG00000027177	ENSMUST00000028600	ensembl_havana	Q3UST3	15259	Hipk3	Homeodomain-interacting protein kinase 3 [Source:UniProtKB/Swiss-Prot;Acc:Q9ERH7]	exon start=circRNA start	exon end=circRNA end	104433168-104433308 exon:ENSMUSE00000166593|104433555-104433845 exon:ENSMUSE00000166599|104434338-104434499 exon:ENSMUSE00001238731|104434590-104434717 exon:ENSMUSE00001220161|104434936-104435057 exon:ENSMUSE00001285131	0	37.2604	0	0	65.6752	38.2284	0	3	0	0	5	3
CBT15_circR_7929	-2.21728821848838	0.0231069	down	9	35235230	35244706	-	-	ENSMUSG00000050471	ENSMUST00000059057	ensembl_havana	Q8C569	109229	Fam118b	Protein FAM118B [Source:UniProtKB/Swiss-Prot;Acc:Q8C569]	exon start=circRNA start	exon end=circRNA end	35235231-35235483 exon:ENSMUSE00000443602|35244614-35244706 exon:ENSMUSE00000443615	0	0	0	25.1807	91.9453	0	0	0	0	2	7	0
CBT15_circR_4415	-2.09182688296278	0.0235379	down	2	156745834	156749356	+	mm9_circ_015028:circbase	ENSMUSG00000061689	ENSMUST00000000094	havana	B1AZP2	228836	Dlgap4	Disks large-associated protein 4 [Source:UniProtKB/Swiss-Prot;Acc:B1AZP2]	exon start=circRNA start	exon end=circRNA end	156745835-156746196 exon:ENSMUSE00001262215|156748023-156748102 exon:ENSMUSE00001276377|156748944-156749356 exon:ENSMUSE00001312427	0	37.2604	0	37.7711	52.5402	0	0	3	0	3	4	0
CBT15_circR_7343	2.04288	0.0218859	up	8	106108124	106109129	+	-	ENSMUSG00000031902	ENSMUST00000109308	ensembl_havana	Q3UZ64	18021	Nfatc3	nuclear factor of activated T cells, cytoplasmic, calcineurin dependent 3 [Source:MGI Symbol;Acc:MGI:103296]	exon start=circRNA start	exon end=circRNA end	106108125-106109129 exon:ENSMUSE00001030831	0	124.201	37.4137	0	0	0	0	10	3	0	0	0
CBT15_circR_5253	-1.97287868143956	0.0237805	down	4	100407812	100412140	+	-	ENSMUSG00000035305	ENSMUST00000039630	ensembl_havana	Q9Z139	26563	Ror1	Inactive tyrosine-protein kinase transmembrane receptor ROR1 [Source:UniProtKB/Swiss-Prot;Acc:Q9Z139]	exon start=circRNA start	exon end=circRNA end	100407813-100407940 exon:ENSMUSE00000377020|100409714-100410031 exon:ENSMUSE00000280683|100411895-100412140 exon:ENSMUSE00000280672	0	0	0	25.1807	0	50.9712	0	0	0	2	0	4
CBT15_circR_457	-2.0621960711804	0.0237374	down	1	66772905	66807604	-	-	ENSMUSG00000026004	ENSMUST00000068168	ensembl_havana	Q5DTI6	68691	Kansl1l	Mus musculus KAT8 regulatory NSL complex subunit 1-like (Kansl1l), transcript variant 3, mRNA. [Source:RefSeq mRNA;Acc:NM_001357156]	exon start=circRNA start	exon end!=circRNA end	-	0	24.8402	0	0	65.6752	25.4856	0	2	0	0	5	2
CBT15_circR_314	2.16776	0.0194472	up	1	21457403	21487333	-	-	ENSMUSG00000028033	ENSMUST00000029667	ensembl_havana	Q9JK45	226922	Kcnq5	Potassium voltage-gated channel subfamily KQT member 5 [Source:UniProtKB/Swiss-Prot;Acc:Q9JK45]	exon start=circRNA start	exon end=circRNA end	21457404-21457624 exon:ENSMUSE00001255625|21466383-21466409 exon:ENSMUSE00000702388|21469470-21469564 exon:ENSMUSE00001270196|21479374-21479469 exon:ENSMUSE00001312286|21487223-21487333 exon:ENSMUSE00001249332	50.0015	24.8402	99.7699	0	0	0	4	2	8	0	0	0
CBT15_circR_644	-2.09518984673612	0.0240579	down	10	128130177	128130456	+	-	-	-	intergenic	-	-	-	-	-	-	-	0	37.2604	0	0	52.5402	38.2284	0	3	0	0	4	3
CBT15_circR_1008	-2.1458560413833	0.0241944	down	11	105240360	105281368	+	-	ENSMUSG00000020694	ENSMUST00000015107	ensembl_havana	O55047	24086	Tlk2	Serine/threonine-protein kinase tousled-like 2 [Source:UniProtKB/Swiss-Prot;Acc:O55047]	exon start=circRNA start	exon end!=circRNA end	-	0	0	0	75.5421	0	25.4856	0	0	0	6	0	2
CBT15_circR_4189	-4.50866436168163	0.0151015	down	2	114050288	114058656	-	-	ENSMUSG00000068614	ENSMUST00000090269	ensembl_havana	P68033	11464	Actc1	Actin, alpha cardiac muscle 1 [Source:UniProtKB/Swiss-Prot;Acc:P68033]	exon start=circRNA start	exon end!=circRNA end	-	0	0	0	0	525.402	1044.91	0	0	0	0	40	82
CBT15_circR_45	-1.86331457719613	0.0245728	down	1	119567795	119579077	-	-	ENSMUSG00000026383	ENSMUST00000052404	ensembl_havana	Q8BGS1	226352	Epb41l5	Band 4.1-like protein 5 [Source:UniProtKB/Swiss-Prot;Acc:Q8BGS1]	exon start=circRNA start	exon end=circRNA end	119567796-119567860 exon:ENSMUSE00000436318|119570045-119570173 exon:ENSMUSE00000436326|119572806-119572903 exon:ENSMUSE00000436338|119578914-119579077 exon:ENSMUSE00000436346	0	24.8402	0	25.1807	0	38.2284	0	2	0	2	0	3
CBT15_circR_631	-2.09605869665265	0.0248154	down	10	12713253	12727912	-	-	ENSMUSG00000019820	ENSMUST00000076817	ensembl	E9Q6R7	22288	Utrn	utrophin	exon start=circRNA start	exon end=circRNA end	12713254-12713434 exon:ENSMUSE00000098318|12714133-12714374 exon:ENSMUSE00000098293|12720018-12720105 exon:ENSMUSE00000098320|12720819-12720942 exon:ENSMUSE00000312550|12726211-12726380 exon:ENSMUSE00000312561|12727733-12727912 exon:ENSMUSE00000098323	0	0	24.9425	50.3614	39.4051	0	0	0	2	4	3	0
CBT15_circR_3875	2.384	0.0265196	up	19	24346236	24360151	-	-	ENSMUSG00000024867	ENSMUST00000025800	ensembl_havana	P70181	18719	Pip5k1b	Phosphatidylinositol 4-phosphate 5-kinase type-1 beta [Source:UniProtKB/Swiss-Prot;Acc:P70181]	exon start=circRNA start	exon end=circRNA end	24346237-24346381 exon:ENSMUSE00000247986|24350134-24350289 exon:ENSMUSE00000145672|24355118-24355202 exon:ENSMUSE00000145692|24358030-24358078 exon:ENSMUSE00000546372|24358211-24358294 exon:ENSMUSE00000145678|24359940-24360151 exon:ENSMUSE00000145688	87.5027	198.722	162.126	100.723	26.2701	0	7	16	13	8	2	0
CBT15_circR_1379	1.54358	0.0240141	up	11	70874745	70887171	+	mm9_circ_001327:circbase	ENSMUSG00000020817	ENSMUST00000076270	ensembl_havana	O35551	54189	Rabep1	rabaptin, RAB GTPase binding effector protein 1 [Source:MGI Symbol;Acc:MGI:1860236]	exon start=circRNA start	exon end=circRNA end	70874746-70874874 exon:ENSMUSE00001256174|70884765-70884968 exon:ENSMUSE00001222682|70887011-70887171 exon:ENSMUSE00001206892	25.0008	49.6805	0	0	0	0	2	4	0	0	0	0
CBT15_circR_5986	1.54358	0.0240141	up	5	130187400	130191043	+	mm9_circ_012854:circbase	ENSMUSG00000025340	ENSMUST00000119797	ensembl_havana	Q9JM13	56715	Rabgef1	Rab5 GDP/GTP exchange factor [Source:UniProtKB/Swiss-Prot;Acc:Q9JM13]	exon start=circRNA start	exon end=circRNA end	130187401-130187586 exon:ENSMUSE00000711184|130190877-130191043 exon:ENSMUSE00000149942	25.0008	49.6805	0	0	0	0	2	4	0	0	0	0
CBT15_circR_4370	2.20183	0.0208029	up	2	14981305	14984439	+	-	ENSMUSG00000057914	ENSMUST00000114719	havana	Q8CC27	12296	Cacnb2	Voltage-dependent L-type calcium channel subunit beta-2 [Source:UniProtKB/Swiss-Prot;Acc:Q8CC27]	exon start=circRNA start	exon end=circRNA end	14981306-14981457 exon:ENSMUSE00000988611|14982788-14982883 exon:ENSMUSE00000293285|14984251-14984439 exon:ENSMUSE00000346078	37.5011	24.8402	124.712	0	0	0	3	2	10	0	0	0
CBT15_circR_1944	1.98644	0.0272293	up	12	85863563	85879475	+	-	ENSMUSG00000012609	ENSMUST00000040179	ensembl_havana	Q8CHB8	320244	Ttll5	tubulin tyrosine ligase-like family, member 5 [Source:MGI Symbol;Acc:MGI:2443657]	exon start=circRNA start	exon end=circRNA end	85863564-85863633 exon:ENSMUSE00001302309|85864525-85864609 exon:ENSMUSE00001266162|85876491-85876592 exon:ENSMUSE00000653285|85878387-85878478 exon:ENSMUSE00000653284|85879368-85879475 exon:ENSMUSE00000653283	87.5027	74.5207	87.2987	0	26.2701	25.4856	7	6	7	0	2	2
CBT15_circR_2461	1.88866	0.0252362	up	14	57846920	57865641	-	mm9_circ_009555:circbase	ENSMUSG00000021969	ENSMUST00000089473	ensembl_havana	Q5Y5T1	75965	Zdhhc20	zinc finger, DHHC domain containing 20	exon start=circRNA start	exon end=circRNA end	57846921-57847062 exon:ENSMUSE00000307294|57856610-57856730 exon:ENSMUSE00000307301|57857628-57857660 exon:ENSMUSE00000558401|57858540-57858609 exon:ENSMUSE00000122541|57865521-57865641 exon:ENSMUSE00000122540	0	49.6805	99.7699	0	0	0	0	4	8	0	0	0
CBT15_circR_2120	2.77931	0.0280797	up	13	48932296	48934078	-	mm9_circ_017352:circbase	ENSMUSG00000038014	ENSMUST00000060805	ensembl_havana	Q6A0A9	218236	Fam120a	family with sequence similarity 120, member A	exon start=circRNA start	exon end=circRNA end	48932297-48932393 exon:ENSMUSE00000276582|48933950-48934078 exon:ENSMUSE00000454406	112.503	186.302	87.2987	88.1325	0	0	9	15	7	7	0	0
CBT15_circR_1200	1.91586	0.0254524	up	11	43704533	43705477	+	mm9_circ_012559:circbase	ENSMUSG00000044950	ENSMUST00000094294	ensembl_havana	Q69Z61	70802	Pwwp2a	PWWP domain-containing protein 2A [Source:UniProtKB/Swiss-Prot;Acc:Q69Z61]	exon start=circRNA start	exon end=circRNA end	43704534-43705477 exon:ENSMUSE00000592259	37.5011	49.6805	37.4137	0	26.2701	0	3	4	3	0	2	0
CBT15_circR_1566	1.74942	0.0264275	up	12	100446859	100495440	-	-	ENSMUSG00000033530	ENSMUST00000062957	ensembl_havana	E9Q6P5	104718	Ttc7b	tetratricopeptide repeat domain 7B	exon start=circRNA start	exon end=circRNA end	100446860-100446981 exon:ENSMUSE00000285082|100466180-100466310 exon:ENSMUSE00000376228|100495272-100495440 exon:ENSMUSE00000334910	0	86.9408	37.4137	0	0	0	0	7	3	0	0	0
CBT15_circR_4578	1.74942	0.0264275	up	2	23506908	23545579	-	-	ENSMUSG00000026771	ENSMUST00000123843	havana	Q2M2N2	76857	Spopl	Speckle-type POZ protein-like [Source:UniProtKB/Swiss-Prot;Acc:Q2M2N2]	exon start!=circRNA start	exon end=circRNA end	-	0	86.9408	37.4137	0	0	0	0	7	3	0	0	0
CBT15_circR_2683	-1.93877904641918	0.0286473	down	15	38493473	38498841	-	-	ENSMUSG00000037458	ENSMUST00000065308	ensembl_havana	O35484	54375	Azin1	Antizyme inhibitor 1 [Source:UniProtKB/Swiss-Prot;Acc:O35484]	exon start=circRNA start	exon end=circRNA end	38493474-38493636 exon:ENSMUSE00001270349|38494292-38494366 exon:ENSMUSE00001266657|38495273-38495354 exon:ENSMUSE00001294624|38497264-38497398 exon:ENSMUSE00000231211|38498669-38498841 exon:ENSMUSE00001374441	0	0	24.9425	0	52.5402	25.4856	0	0	2	0	4	2
CBT15_circR_4207	-1.82151328731047	0.0286816	down	2	118862963	118870185	+	-	ENSMUSG00000027332	ENSMUST00000028807	ensembl_havana	Q9JHI5	56357	Ivd	Isovaleryl-CoA dehydrogenase, mitochondrial [Source:UniProtKB/Swiss-Prot;Acc:Q9JHI5]	transcript start<=circRNA start	transcript end>=circRNA end	-	0	37.2604	0	0	39.4051	25.4856	0	3	0	0	3	2
CBT15_circR_7826	1.73956	0.0271863	up	9	116129815	116131713	-	mm9_circ_007525:circbase	ENSMUSG00000032440	ENSMUST00000035014	ensembl_havana	Q8BQS9	21813	Tgfbr2	transforming growth factor, beta receptor II [Source:MGI Symbol;Acc:MGI:98729]	exon start=circRNA start	exon end=circRNA end	116129816-116130006 exon:ENSMUSE00000219766|116131545-116131713 exon:ENSMUSE00000327655	0	49.6805	74.8275	0	0	0	0	4	6	0	0	0
CBT15_circR_2186	1.25332	0.0233318	up	13	69512889	69515903	-	mm9_circ_006518:circbase	ENSMUSG00000034575	ENSMUST00000044081	ensembl	Q6PB75	210106	Papd7	Non-canonical poly(A) RNA polymerase PAPD7 [Source:UniProtKB/Swiss-Prot;Acc:Q6PB75]	exon start=circRNA start	exon end=circRNA end	69512890-69513010 exon:ENSMUSE00000230591|69514965-69515011 exon:ENSMUSE00000230597|69515780-69515903 exon:ENSMUSE00000461861	150.005	298.083	212.011	37.7711	52.5402	140.171	12	24	17	3	4	11
CBT15_circR_3928	1.66292	0.0282217	up	19	3600672	3605494	-	-	ENSMUSG00000024913	ENSMUST00000025856	ensembl_havana	Q91VN0	16973	Lrp5	Low-density lipoprotein receptor-related protein 5 [Source:UniProtKB/Swiss-Prot;Acc:Q91VN0]	exon start=circRNA start	exon end=circRNA end	3600673-3600798 exon:ENSMUSE00001287614|3602235-3602444 exon:ENSMUSE00001299809|3604002-3604192 exon:ENSMUSE00001288434|3605286-3605494 exon:ENSMUSE00001293687	0	74.5207	37.4137	0	0	0	0	6	3	0	0	0
CBT15_circR_5652	1.66292	0.0282217	up	4	48636839	48650418	+	mm9_circ_008846:circbase	ENSMUSG00000028347	ENSMUST00000030032	ensembl_havana	Q6PFE7	230157	Tmeff1	Mus musculus transmembrane protein with EGF-like and two follistatin-like domains 1 (Tmeff1), transcript variant 1, mRNA. [Source:RefSeq mRNA;Acc:NM_001356272]	exon start=circRNA start	exon end=circRNA end	48636840-48636988 exon:ENSMUSE00000178352|48638980-48639045 exon:ENSMUSE00000178350|48650295-48650418 exon:ENSMUSE00000178345	0	74.5207	37.4137	0	0	0	0	6	3	0	0	0
CBT15_circR_4374	1.68691	0.0278238	up	2	152302151	152308431	+	mm9_circ_010040:circbase	ENSMUSG00000027465	ENSMUST00000028963	ensembl_havana	Q0P648	67231	Tbc1d20	TBC1 domain family member 20 [Source:UniProtKB/Swiss-Prot;Acc:Q9D9I4]	exon start=circRNA start	exon end=circRNA end	152302152-152302337 exon:ENSMUSE00001296735|152304946-152305026 exon:ENSMUSE00001289405|152307989-152308175 exon:ENSMUSE00000169764|152308330-152308431 exon:ENSMUSE00000169765	62.5019	37.2604	24.9425	0	0	0	5	3	2	0	0	0
CBT15_circR_233	1.83929	0.0333569	up	1	172173942	172187460	+	-	ENSMUSG00000026554	ENSMUST00000074144	havana	Q8N7N5	98193	Dcaf8	DDB1- and CUL4-associated factor 8 [Source:UniProtKB/Swiss-Prot;Acc:Q8N7N5]	exon start=circRNA start	exon end=circRNA end	172173943-172174083 exon:ENSMUSE00000296421|172175483-172175577 exon:ENSMUSE00000296414|172179907-172180017 exon:ENSMUSE00000296344|172186296-172186368 exon:ENSMUSE00000296335|172186855-172186912 exon:ENSMUSE00000296325|172187353-172187460 exon:ENSMUSE00001088686	37.5011	124.201	87.2987	25.1807	0	25.4856	3	10	7	2	0	2
CBT15_circR_3426	1.73052	0.0287049	up	17	64710703	64714712	+	mm9_circ_016806:circbase	ENSMUSG00000024085	ENSMUST00000086723	ensembl_havana	Q8C4L1	17158	Man2a1	Alpha-mannosidase 2 [Source:UniProtKB/Swiss-Prot;Acc:P27046]	exon start=circRNA start	exon end=circRNA end	64710704-64710869 exon:ENSMUSE00000540937|64712252-64712473 exon:ENSMUSE00000138264|64713562-64713684 exon:ENSMUSE00000332597|64714598-64714712 exon:ENSMUSE00000450810	50.0015	49.6805	0	0	0	0	4	4	0	0	0	0
CBT15_circR_5674	2.23901	0.0319167	up	4	57854561	57857037	+	-	ENSMUSG00000089945	ENSMUST00000098066	havana	O54931	677884	Pakap	paralemmin A kinase anchor protein [Source:RefSeq peptide;Acc:NP_001291473]	exon start=circRNA start	exon end=circRNA end	57854562-57857037 exon:ENSMUSE00001218505	75.0023	62.1006	74.8275	37.7711	0	0	6	5	6	3	0	0
CBT15_circR_6390	-1.85009561963309	0.0311601	down	5	81329756	81387988	+	-	ENSMUSG00000037605	ENSMUST00000036068	ensembl	Q80TS3	319387	Adgrl3	Adhesion G protein-coupled receptor L3 [Source:UniProtKB/Swiss-Prot;Acc:Q80TS3]	exon start=circRNA start	exon end=circRNA end	81329757-81329960 exon:ENSMUSE00001287413|81387775-81387988 exon:ENSMUSE00001308577	0	24.8402	24.9425	25.1807	0	38.2284	0	2	2	2	0	3
CBT15_circR_6476	-2.31082758607868	0.0307973	down	6	118734850	118757526	-	-	ENSMUSG00000051331	ENSMUST00000075591	havana	Q01815	12288	Cacna1c	Voltage-dependent L-type calcium channel subunit alpha-1C [Source:UniProtKB/Swiss-Prot;Acc:Q01815]	exon start=circRNA start	exon end=circRNA end	118734851-118735023 exon:ENSMUSE00000459287|118742265-118742368 exon:ENSMUSE00000518961|118751369-118751565 exon:ENSMUSE00000517925|118757368-118757526 exon:ENSMUSE00001209254	0	49.6805	0	62.9518	52.5402	0	0	4	0	5	4	0
CBT15_circR_4179	1.58997	0.0301362	up	2	104778136	104780260	-	-	ENSMUSG00000074994	ENSMUST00000117237	ensembl_havana	A2BIE1	99003	Qser1	glutamine and serine rich 1 [Source:HGNC Symbol;Acc:HGNC:26154]	exon start=circRNA start	exon end=circRNA end	104778137-104778253 exon:ENSMUSE00000717872|104779935-104780260 exon:ENSMUSE00000720790	0	49.6805	62.3562	0	0	0	0	4	5	0	0	0
CBT15_circR_7094	1.58997	0.0301362	up	7	27459255	27459652	+	-	ENSMUSG00000040466	ENSMUST00000037399	ensembl_havana	Q923D2	233016	Blvrb	Flavin reductase (NADPH) [Source:UniProtKB/Swiss-Prot;Acc:Q923D2]	exon start=circRNA start	exon end=circRNA end	27459256-27459420 exon:ENSMUSE00001278150|27459563-27459652 exon:ENSMUSE00001271673	0	49.6805	62.3562	0	0	0	0	4	5	0	0	0
CBT15_circR_209	1.64781	0.0257251	up	1	165350883	165357546	-	-	ENSMUSG00000026571	ENSMUST00000027856	ensembl_havana	Q9DC22	74106	Dcaf6	DDB1- and CUL4-associated factor 6 [Source:UniProtKB/Swiss-Prot;Acc:Q9DC22]	exon start=circRNA start	exon end=circRNA end	165350884-165351280 exon:ENSMUSE00000160630|165351472-165351540 exon:ENSMUSE00000160633|165351961-165352076 exon:ENSMUSE00000160632|165357429-165357546 exon:ENSMUSE00000160637	25.0008	0	0	0	0	0	2	0	0	0	0	0
CBT15_circR_1096	1.64781	0.0257251	up	11	120128422	120134882	-	-	ENSMUSG00000061306	ENSMUST00000045402	ensembl_havana	Q5I012	72055	Slc38a10	Putative sodium-coupled neutral amino acid transporter 10 [Source:UniProtKB/Swiss-Prot;Acc:Q5I012]	exon start=circRNA start	exon end=circRNA end	120128423-120128529 exon:ENSMUSE00000395207|120129201-120129312 exon:ENSMUSE00000150350|120132677-120132859 exon:ENSMUSE00000150353|120134780-120134882 exon:ENSMUSE00001230652	25.0008	0	0	0	0	0	2	0	0	0	0	0
CBT15_circR_1443	1.64781	0.0257251	up	11	78319985	78321766	+	-	ENSMUSG00000002055	ENSMUST00000045026	ensembl_havana	Q7TME2	54141	Spag5	Sperm-associated antigen 5 [Source:UniProtKB/Swiss-Prot;Acc:Q7TME2]	exon start=circRNA start	exon end=circRNA end	78319986-78320072 exon:ENSMUSE00001230878|78320332-78320452 exon:ENSMUSE00000286228|78320561-78320672 exon:ENSMUSE00000286219|78321043-78321123 exon:ENSMUSE00000286208|78321262-78321417 exon:ENSMUSE00000286199|78321498-78321572 exon:ENSMUSE00000286192|78321686-78321766 exon:ENSMUSE00000286188	25.0008	0	0	0	0	0	2	0	0	0	0	0
CBT15_circR_3483	1.64781	0.0257251	up	17	78237741	78281366	+	-	ENSMUSG00000024074	ENSMUST00000112498	ensembl	Q9JLL0	50766	Crim1	cysteine rich transmembrane BMP regulator 1 (chordin like)	exon start=circRNA start	exon end=circRNA end	78237742-78237915 exon:ENSMUSE00000259898|78279973-78280215 exon:ENSMUSE00000259874|78281246-78281366 exon:ENSMUSE00000138029	25.0008	0	0	0	0	0	2	0	0	0	0	0
CBT15_circR_5183	1.64781	0.0257251	up	3	88965811	89007877	+	-	ENSMUSG00000028053	ENSMUST00000090933	ensembl	Q99MY8	192195	Ash1l	Histone-lysine N-methyltransferase ASH1L [Source:UniProtKB/Swiss-Prot;Acc:Q99MY8]	exon start=circRNA start	exon end=circRNA end	88965812-88966328 exon:ENSMUSE00000436728|88981233-88985790 exon:ENSMUSE00000510362|89001773-89001874 exon:ENSMUSE00000567020|89007142-89007877 exon:ENSMUSE00000567019	25.0008	0	0	0	0	0	2	0	0	0	0	0
CBT15_circR_5291	1.64781	0.0257251	up	4	108478872	108491464	+	-	ENSMUSG00000034610	ENSMUST00000043368	ensembl	B2RX14	230594	Zcchc11	zinc finger, CCHC domain containing 11 [Source:MGI Symbol;Acc:MGI:2445126]	exon start=circRNA start	exon end=circRNA end	108478873-108479741 exon:ENSMUSE00000601575|108486454-108486617 exon:ENSMUSE00000180495|108491348-108491464 exon:ENSMUSE00000270763	25.0008	0	0	0	0	0	2	0	0	0	0	0
CBT15_circR_5507	1.64781	0.0257251	up	4	141167712	141170940	+	-	ENSMUSG00000028920	ENSMUST00000030757	ensembl_havana	Q6PDJ6	213499	Fbxo42	F-box only protein 42 [Source:UniProtKB/Swiss-Prot;Acc:Q6PDJ6]	exon start=circRNA start	exon end=circRNA end	141167713-141167977 exon:ENSMUSE00000357794|141170824-141170940 exon:ENSMUSE00000403684	25.0008	0	0	0	0	0	2	0	0	0	0	0
CBT15_circR_5758	1.64781	0.0257251	up	4	86777712	86781711	+	-	ENSMUSG00000038024	ENSMUST00000045512	ensembl	A6H8H2	329877	Dennd4c	DENN domain-containing protein 4C [Source:UniProtKB/Swiss-Prot;Acc:A6H8H2]	exon start=circRNA start	exon end=circRNA end	86777713-86777965 exon:ENSMUSE00000371714|86779835-86779904 exon:ENSMUSE00001308683|86781542-86781711 exon:ENSMUSE00000399963	25.0008	0	0	0	0	0	2	0	0	0	0	0
CBT15_circR_5936	1.64781	0.0257251	up	5	121772666	121778105	+	mm9_circ_016398:circbase	ENSMUSG00000042605	ENSMUST00000051950	ensembl_havana	O70305	20239	Atxn2	ataxin 2 [Source:HGNC Symbol;Acc:HGNC:10555]	exon start=circRNA start	exon end=circRNA end	121772667-121772788 exon:ENSMUSE00000991781|121777370-121777461 exon:ENSMUSE00001091260|121777908-121778105 exon:ENSMUSE00000975319	25.0008	0	0	0	0	0	2	0	0	0	0	0
CBT15_circR_6486	1.64781	0.0257251	up	6	119045110	119057515	-	-	ENSMUSG00000051331	ENSMUST00000075591	havana	Q01815	12288	Cacna1c	Voltage-dependent L-type calcium channel subunit alpha-1C [Source:UniProtKB/Swiss-Prot;Acc:Q01815]	exon start!=circRNA start	exon end=circRNA end	-	25.0008	0	0	0	0	0	2	0	0	0	0	0
CBT15_circR_8360	1.64781	0.0257251	up	X	18261522	18264710	+	-	ENSMUSG00000037369	ENSMUST00000044484	havana	O70546	22289	Kdm6a	Lysine-specific demethylase 6A [Source:UniProtKB/Swiss-Prot;Acc:O70546]	exon start=circRNA start	exon end=circRNA end	18261523-18261628 exon:ENSMUSE00000557225|18262230-18262435 exon:ENSMUSE00000327122|18263948-18264012 exon:ENSMUSE00000327120|18264086-18264160 exon:ENSMUSE00000557221|18264562-18264710 exon:ENSMUSE00000557220	25.0008	0	0	0	0	0	2	0	0	0	0	0
CBT15_circR_3796	-1.46836776001942	0.0317922	down	18	7901495	7906044	+	-	ENSMUSG00000024283	ENSMUST00000074919	havana	Q924H7	225131	Wac	WW domain containing adaptor with coiled-coil [Source:MGI Symbol;Acc:MGI:2387357]	exon start=circRNA start	exon end=circRNA end	7901496-7901602 exon:ENSMUSE00000520309|7905400-7905515 exon:ENSMUSE00000494078|7905932-7906044 exon:ENSMUSE00000493156	0	0	0	0	26.2701	25.4856	0	0	0	0	2	2
CBT15_circR_5103	-1.46836776001942	0.0317922	down	3	57769039	57807127	+	-	ENSMUSG00000036503	ENSMUST00000041826	ensembl_havana	O54965	24017	Rnf13	ring finger protein 13 [Source:MGI Symbol;Acc:MGI:1346341]	exon start=circRNA start	exon end=circRNA end	57769040-57769120 exon:ENSMUSE00000255638|57779383-57779508 exon:ENSMUSE00000255632|57796198-57796285 exon:ENSMUSE00000255626|57802447-57802537 exon:ENSMUSE00000255621|57807022-57807127 exon:ENSMUSE00000255614	0	0	0	0	26.2701	25.4856	0	0	0	0	2	2
CBT15_circR_6775	-1.6296411815566	0.0328106	down	6	83942833	83947941	+	-	ENSMUSG00000030016	ENSMUST00000032088	havana	Q61464	18139	Zfp638	zinc finger protein 638 [Source:MGI Symbol;Acc:MGI:1203484]	exon start=circRNA start	exon end=circRNA end	83942834-83943141 exon:ENSMUSE00000194357|83944613-83944887 exon:ENSMUSE00000194347|83946217-83946363 exon:ENSMUSE00000194365|83947819-83947941 exon:ENSMUSE00000194349	0	0	0	0	26.2701	38.2284	0	0	0	0	2	3
CBT15_circR_2781	1.53035	0.0314953	up	15	80000328	80001887	-	-	ENSMUSG00000000489	ENSMUST00000000500	ensembl_havana	P31240	18591	Pdgfb	platelet derived growth factor, B polypeptide	exon start=circRNA start	exon end=circRNA end	80000329-80000473 exon:ENSMUSE00000126335|80001682-80001887 exon:ENSMUSE00000126330	0	62.1006	37.4137	0	0	0	0	5	3	0	0	0
CBT15_circR_6224	1.53035	0.0314953	up	5	32478065	32491189	+	mm9_circ_018676:circbase	ENSMUSG00000014956	ENSMUST00000201360	havana	P62141	19046	Ppp1cb	Serine/threonine-protein phosphatase PP1-beta catalytic subunit [Source:UniProtKB/Swiss-Prot;Acc:P62141]	exon start=circRNA start	exon end=circRNA end	32478066-32478197 exon:ENSMUSE00000185994|32480690-32480920 exon:ENSMUSE00001300380|32483360-32483464 exon:ENSMUSE00001297527|32485259-32485330 exon:ENSMUSE00000185995|32485881-32486032 exon:ENSMUSE00000185998|32487571-32487705 exon:ENSMUSE00001083665|32490954-32491189 exon:ENSMUSE00001362646	0	62.1006	37.4137	0	0	0	0	5	3	0	0	0
CBT15_circR_7338	1.53035	0.0314953	up	8	106078603	106083973	+	-	ENSMUSG00000031902	ENSMUST00000109308	ensembl_havana	Q3UZ64	18021	Nfatc3	nuclear factor of activated T cells, cytoplasmic, calcineurin dependent 3 [Source:MGI Symbol;Acc:MGI:103296]	exon start=circRNA start	exon end=circRNA end	106078604-106079741 exon:ENSMUSE00000214533|106083811-106083973 exon:ENSMUSE00000223798	0	62.1006	37.4137	0	0	0	0	5	3	0	0	0
CBT15_circR_4348	1.47242	0.031755	up	2	145947045	146045547	+	-	ENSMUSG00000037143	ENSMUST00000133433	havana	B7ZCD6	78774	Cfap61	cilia and flagella associated protein 61	exon start=circRNA start	exon end=circRNA end	145947046-145947196 exon:ENSMUSE00001260548|145949919-145949995 exon:ENSMUSE00000249456|145950759-145950826 exon:ENSMUSE00000249451|145951058-145951184 exon:ENSMUSE00000249445|145963298-145963430 exon:ENSMUSE00000463927|145973472-145973631 exon:ENSMUSE00000682298|146001855-146001919 exon:ENSMUSE00000682297|146008868-146008951 exon:ENSMUSE00000682296|146012078-146012253 exon:ENSMUSE00000778649|146…	25.0008	0	37.4137	0	0	0	2	0	3	0	0	0
CBT15_circR_4485	1.47242	0.031755	up	2	167507046	167511326	+	-	ENSMUSG00000006418	ENSMUST00000078050	ensembl_havana	Q9ET26	81018	Rnf114	E3 ubiquitin-protein ligase RNF114 [Source:UniProtKB/Swiss-Prot;Acc:Q9ET26]	exon start=circRNA start	exon end=circRNA end	167507047-167507197 exon:ENSMUSE00000172363|167510876-167510982 exon:ENSMUSE00001309098|167511212-167511326 exon:ENSMUSE00001273766	25.0008	0	37.4137	0	0	0	2	0	3	0	0	0
CBT15_circR_5562	1.47242	0.031755	up	4	150406195	150406664	+	mm9_circ_006017:circbase	ENSMUSG00000039852	ENSMUST00000105682	ensembl_havana	Q80TZ9	68703	Rere	Arginine-glutamic acid dipeptide repeats protein [Source:UniProtKB/Swiss-Prot;Acc:Q80TZ9]	exon start=circRNA start	exon end=circRNA end	150406196-150406664 exon:ENSMUSE00000667081	25.0008	0	37.4137	0	0	0	2	0	3	0	0	0
CBT15_circR_7090	1.47242	0.031755	up	7	27121651	27125003	+	-	ENSMUSG00000052974	ENSMUST00000003100	ensembl_havana	P33267	13107	Cyp2f2	Cytochrome P450 2F2 [Source:UniProtKB/Swiss-Prot;Acc:P33267]	exon start!=circRNA start	exon end=circRNA end	-	25.0008	0	37.4137	0	0	0	2	0	3	0	0	0
CBT15_circR_3854	-1.91210730522821	0.0338358	down	19	11923800	11925226	+	-	ENSMUSG00000046139	ENSMUST00000061618	ensembl	Q3TC46	225929	Patl1	protein associated with topoisomerase II homolog 1 (yeast)	exon start=circRNA start	exon end=circRNA end	11923801-11924018 exon:ENSMUSE00000398510|11925137-11925226 exon:ENSMUSE00000364162	0	37.2604	24.9425	25.1807	52.5402	0	0	3	2	2	4	0
CBT15_circR_1160	-1.74342782033357	0.0341447	down	11	29482108	29498612	+	-	ENSMUSG00000032740	ENSMUST00000040182	ensembl_havana	Q5SNZ0	108686	Ccdc88a	Girdin [Source:UniProtKB/Swiss-Prot;Acc:Q5SNZ0]	exon start=circRNA start	exon end=circRNA end	29482109-29482386 exon:ENSMUSE00000402171|29482598-29482741 exon:ENSMUSE00000281329|29485825-29486011 exon:ENSMUSE00000281319|29489582-29489727 exon:ENSMUSE00000281309|29493700-29493792 exon:ENSMUSE00000281297|29493879-29494093 exon:ENSMUSE00000281288|29498409-29498612 exon:ENSMUSE00000281281	0	0	0	0	26.2701	50.9712	0	0	0	0	2	4
CBT15_circR_1578	-2.65887284639379	0.0374204	down	12	101665552	101694673	-	-	ENSMUSG00000021187	ENSMUST00000110047	havana	Q91XT6	74413	Tc2n	Tandem C2 domains nuclear protein [Source:UniProtKB/Swiss-Prot;Acc:Q91XT6]	exon start=circRNA start	exon end=circRNA end	101665553-101665744 exon:ENSMUSE00000115428|101678514-101678630 exon:ENSMUSE00000115430|101688960-101689060 exon:ENSMUSE00000115429|101689777-101689852 exon:ENSMUSE00000115425|101693115-101693206 exon:ENSMUSE00000115431|101694506-101694673 exon:ENSMUSE00000261355	0	62.1006	0	62.9518	26.2701	127.428	0	5	0	5	2	10
CBT15_circR_6910	1.48269	0.0329157	up	7	115659515	115662444	-	-	ENSMUSG00000051910	ENSMUST00000072804	ensembl	P40645	20679	Sox6	SRY (sex determining region Y)-box 6 [Source:MGI Symbol;Acc:MGI:98368]	exon start=circRNA start	exon end=circRNA end	115659516-115659584 exon:ENSMUSE00000527721|115662272-115662444 exon:ENSMUSE00000505451	0	49.6805	49.885	0	0	0	0	4	4	0	0	0
CBT15_circR_1573	2.43594	0.0324562	up	12	101646579	101694673	-	-	ENSMUSG00000021187	ENSMUST00000110047	havana	Q91XT6	74413	Tc2n	Tandem C2 domains nuclear protein [Source:UniProtKB/Swiss-Prot;Acc:Q91XT6]	exon start!=circRNA start	exon end=circRNA end	-	0	136.621	49.885	0	26.2701	0	0	11	4	0	2	0
CBT15_circR_1363	-1.85125369422025	0.0360152	down	11	69027253	69028064	+	-	ENSMUSG00000020898	ENSMUST00000021278	ensembl_havana	Q5SUQ9	68964	Ctc1	CST complex subunit CTC1 [Source:UniProtKB/Swiss-Prot;Acc:Q5SUQ9]	exon start=circRNA start	exon end=circRNA end	69027254-69027486 exon:ENSMUSE00001276073|69027604-69027781 exon:ENSMUSE00001303080|69027864-69028064 exon:ENSMUSE00001205171	0	0	0	0	26.2701	63.714	0	0	0	0	2	5
CBT15_circR_1893	1.64409	0.0335723	up	12	79263772	79264433	-	-	ENSMUSG00000066440	ENSMUST00000021547	ensembl_havana	Q5DU37	211978	Zfyve26	zinc finger, FYVE domain containing 26	exon start=circRNA start	exon end=circRNA end	79263773-79263949 exon:ENSMUSE00000612459|79264311-79264433 exon:ENSMUSE00000612460	25.0008	0	49.885	0	0	0	2	0	4	0	0	0
CBT15_circR_7284	-1.7046066844477	0.036678	down	7	90189149	90197020	+	-	ENSMUSG00000039361	ENSMUST00000049537	havana	Q7M6Y3	233489	Picalm	Phosphatidylinositol-binding clathrin assembly protein [Source:UniProtKB/Swiss-Prot;Acc:Q7M6Y3]	exon start=circRNA start	exon end=circRNA end	90189150-90189257 exon:ENSMUSE00000323591|90191156-90191272 exon:ENSMUSE00001381673|90191359-90191389 exon:ENSMUSE00000323571|90191654-90191753 exon:ENSMUSE00000505476|90194273-90194296 exon:ENSMUSE00000493150|90195655-90195714 exon:ENSMUSE00000323545|90196916-90197020 exon:ENSMUSE00000501341	0	0	0	50.3614	26.2701	0	0	0	0	4	2	0
CBT15_circR_4543	-1.88232426684722	0.0373376	down	2	181411695	181424388	-	-	ENSMUSG00000027583	ENSMUST00000029106	havana	Q8BID6	72147	Zbtb46	zinc finger and BTB domain containing 46 [Source:MGI Symbol;Acc:MGI:1919397]	exon start=circRNA start	exon end=circRNA end	181411696-181411980 exon:ENSMUSE00000432803|181423419-181424388 exon:ENSMUSE00000545524	0	0	0	75.5421	26.2701	0	0	0	0	6	2	0
CBT15_circR_222	-1.40819235715643	0.0360785	down	1	170149270	170166948	-	-	ENSMUSG00000026670	ENSMUST00000027981	ensembl	Q3UHZ7	107652	Uap1	UDP-N-acetylglucosamine pyrophosphorylase 1 [Source:MGI Symbol;Acc:MGI:1334459]	exon start=circRNA start	exon end=circRNA end	170149271-170149459 exon:ENSMUSE00000161746|170150312-170150452 exon:ENSMUSE00000161744|170150943-170151136 exon:ENSMUSE00001308710|170156924-170157096 exon:ENSMUSE00001250436|170158751-170158926 exon:ENSMUSE00001222300|170161367-170161571 exon:ENSMUSE00001286601|170166626-170166948 exon:ENSMUSE00001255194	0	0	0	25.1807	26.2701	0	0	0	0	2	2	0
CBT15_circR_3516	-1.40819235715643	0.0360785	down	17	86098511	86103000	-	mm9_circ_011841:circbase	ENSMUSG00000024135	ENSMUST00000095187	ensembl	F8WGW3	78586	Srbd1	S1 RNA binding domain 1	exon start=circRNA start	exon end=circRNA end	86098512-86098619 exon:ENSMUSE00000605986|86099205-86099295 exon:ENSMUSE00000605987|86102843-86103000 exon:ENSMUSE00000605988	0	0	0	25.1807	26.2701	0	0	0	0	2	2	0
CBT15_circR_6884	-1.40819235715643	0.0360785	down	7	111508052	111520175	-	-	ENSMUSG00000038296	ENSMUST00000049430	ensembl_havana	Q8K1B9	233733	Galnt18	Polypeptide N-acetylgalactosaminyltransferase 18 [Source:UniProtKB/Swiss-Prot;Acc:Q8K1B9]	exon start=circRNA start	exon end=circRNA end	111508053-111508148 exon:ENSMUSE00000304603|111513498-111513635 exon:ENSMUSE00000304609|111519990-111520175 exon:ENSMUSE00000304613	0	0	0	25.1807	26.2701	0	0	0	0	2	2	0
CBT15_circR_8031	-1.40819235715643	0.0360785	down	9	59396350	59405855	-	-	ENSMUSG00000025234	ENSMUST00000026264	havana	Q9Z1K5	23806	Arih1	E3 ubiquitin-protein ligase ARIH1 [Source:UniProtKB/Swiss-Prot;Acc:Q9Z1K5]	exon start=circRNA start	exon end=circRNA end	59396351-59396611 exon:ENSMUSE00001261357|59403368-59403425 exon:ENSMUSE00001222700|59405725-59405855 exon:ENSMUSE00001244694	0	0	0	25.1807	26.2701	0	0	0	0	2	2	0
CBT15_circR_2772	-1.69884736756974	0.0386031	down	15	79133463	79134030	+	-	ENSMUSG00000033039	ENSMUST00000040320	ensembl_havana	Q8BGT6	27008	Micall1	microtubule associated monooxygenase, calponin and LIM domain containing -like 1	transcript start<=circRNA start	transcript end>=circRNA end	-	0	24.8402	0	50.3614	26.2701	0	0	2	0	4	2	0
CBT15_circR_4299	-1.69884736756974	0.0386031	down	2	130439619	130440579	+	-	ENSMUSG00000027411	ENSMUST00000028900	ensembl_havana	Q8C016	80743	Vps16	VSP16 CORVET/HOPS core subunit [Source:MGI Symbol;Acc:MGI:2136772]	exon start=circRNA start	exon end=circRNA end	130439620-130439714 exon:ENSMUSE00001310664|130439841-130439917 exon:ENSMUSE00001374890|130440231-130440362 exon:ENSMUSE00000169261|130440452-130440579 exon:ENSMUSE00000169263	0	24.8402	0	50.3614	26.2701	0	0	2	0	4	2	0
CBT15_circR_1598	-1.56585112537048	0.0383648	down	12	102785525	102785793	+	-	ENSMUSG00000041702	ENSMUST00000045652	havana	Q8CFE5	238386	Btbd7	BTB (POZ) domain containing 7	transcript start<=circRNA start	transcript end>=circRNA end	-	0	24.8402	0	37.7711	26.2701	0	0	2	0	3	2	0
CBT15_circR_5815	1.69064	0.0356172	up	5	101781374	101798516	+	mm9_circ_004198:circbase	ENSMUSG00000029330	ENSMUST00000031273	ensembl_havana	P98191	74596	Cds1	Phosphatidate cytidylyltransferase 1 [Source:UniProtKB/Swiss-Prot;Acc:P98191]	exon start=circRNA start	exon end=circRNA end	101781375-101781502 exon:ENSMUSE00000651724|101791475-101791571 exon:ENSMUSE00000651723|101797004-101797101 exon:ENSMUSE00000651722|101798377-101798516 exon:ENSMUSE00000651721	25.0008	0	62.3562	0	0	0	2	0	5	0	0	0
CBT15_circR_7536	1.40625	0.0234412	up	8	3258382	3258934	-	-	ENSMUSG00000005534	ENSMUST00000091291	ensembl_havana	P15208	16337	Insr	Insulin receptor Insulin receptor subunit alpha Insulin receptor subunit beta [Source:UniProtKB/Swiss-Prot;Acc:P15208]	exon start=circRNA start	exon end=circRNA end	3258383-3258934 exon:ENSMUSE00001230539	175.005	608.586	723.332	151.084	118.215	127.428	14	49	58	12	9	10
CBT15_circR_564	-2.11750891739514	0.0402332	down	10	107045212	107053516	-	-	ENSMUSG00000035948	ENSMUST00000044668	ensembl_havana	Q14DH7	380660	Acss3	Acyl-CoA synthetase short-chain family member 3, mitochondrial [Source:UniProtKB/Swiss-Prot;Acc:Q14DH7]	exon start=circRNA start	exon end=circRNA end	107045213-107045353 exon:ENSMUSE00000258163|107049364-107049498 exon:ENSMUSE00000258258|107053328-107053516 exon:ENSMUSE00000258266	0	49.6805	0	25.1807	78.8103	0	0	4	0	2	6	0
CBT15_circR_2137	1.71287	0.0366747	up	13	55233894	55238862	+	-	ENSMUSG00000021488	ENSMUST00000099490	ensembl_havana	Q3UL03	18193	Nsd1	nuclear receptor-binding SET-domain protein 1	exon start=circRNA start	exon end=circRNA end	55233895-55234030 exon:ENSMUSE00000367240|55238690-55238862 exon:ENSMUSE00000235771	37.5011	0	49.885	0	0	0	3	0	4	0	0	0
CBT15_circR_8354	1.71287	0.0366747	up	X	164391601	164400858	+	-	ENSMUSG00000031380	ENSMUST00000033751	ensembl_havana	P97946	14205	Vegfd	vascular endothelial growth factor D [Source:MGI Symbol;Acc:MGI:108037]	exon start=circRNA start	exon end=circRNA end	164391602-164391792 exon:ENSMUSE00000237418|164394433-164394581 exon:ENSMUSE00001232748|164395933-164396033 exon:ENSMUSE00001281037|164400663-164400858 exon:ENSMUSE00000371613	37.5011	0	49.885	0	0	0	3	0	4	0	0	0
CBT15_circR_1290	1.55702	0.0384172	up	11	59700126	59700309	+	-	ENSMUSG00000005417	ENSMUST00000066330	havana	P97434	26936	Mprip	Myosin phosphatase Rho-interacting protein [Source:UniProtKB/Swiss-Prot;Acc:P97434]	transcript start<=circRNA start	transcript end>=circRNA end	-	37.5011	0	37.4137	0	0	0	3	0	3	0	0	0
CBT15_circR_4609	1.55702	0.0384172	up	2	27089583	27098703	+	-	ENSMUSG00000036040	ENSMUST00000091233	ensembl_havana	A1A5B7	77794	Adamtsl2	ADAMTS-like protein 2 [Source:UniProtKB/Swiss-Prot;Acc:Q7TSK7]	exon start=circRNA start	exon end=circRNA end	27089584-27089759 exon:ENSMUSE00000332278|27093533-27093890 exon:ENSMUSE00000502154|27095403-27095772 exon:ENSMUSE00000470403|27098606-27098703 exon:ENSMUSE00000471675	37.5011	0	37.4137	0	0	0	3	0	3	0	0	0
CBT15_circR_5086	1.55702	0.0384172	up	3	51323221	51326035	-	-	ENSMUSG00000037174	ENSMUST00000062009	havana	Q9JHC9	69257	Elf2	ETS-related transcription factor Elf-2 [Source:UniProtKB/Swiss-Prot;Acc:Q9JHC9]	exon start=circRNA start	exon end=circRNA end	51323222-51323451 exon:ENSMUSE00001252699|51325948-51326035 exon:ENSMUSE00000484420	37.5011	0	37.4137	0	0	0	3	0	3	0	0	0
CBT15_circR_5985	1.55702	0.0384172	up	5	130179654	130180308	+	-	ENSMUSG00000025340	ENSMUST00000119797	ensembl_havana	Q9JM13	56715	Rabgef1	Rab5 GDP/GTP exchange factor [Source:UniProtKB/Swiss-Prot;Acc:Q9JM13]	transcript start<=circRNA start	transcript end>=circRNA end	-	37.5011	0	37.4137	0	0	0	3	0	3	0	0	0
CBT15_circR_8302	1.55702	0.0384172	up	X	130047324	130109381	+	-	ENSMUSG00000034480	ENSMUST00000037854	ensembl_havana	Q6W4W7	54004	Diaph2	2 [Source:UniProtKB/Swiss-Prot;Acc:O70566]	exon start=circRNA start	exon end=circRNA end	130047325-130047426 exon:ENSMUSE00001215681|130050367-130050461 exon:ENSMUSE00001273926|130073822-130073923 exon:ENSMUSE00001213921|130088527-130088766 exon:ENSMUSE00001292498|130109252-130109381 exon:ENSMUSE00001294615	37.5011	0	37.4137	0	0	0	3	0	3	0	0	0
CBT15_circR_3767	-1.61766068705662	0.0409109	down	18	73648884	73662867	-	-	ENSMUSG00000024515	ENSMUST00000025393	ensembl_havana	P97471	17128	Smad4	Mothers against decapentaplegic homolog 4 [Source:UniProtKB/Swiss-Prot;Acc:P97471]	exon start=circRNA start	exon end=circRNA end	73648885-73649053 exon:ENSMUSE00000143006|73649726-73649909 exon:ENSMUSE00000143011|73657195-73657245 exon:ENSMUSE00001221471|73658568-73658684 exon:ENSMUSE00001289688|73658779-73658898 exon:ENSMUSE00001232517|73662658-73662867 exon:ENSMUSE00001246175	0	37.2604	0	0	26.2701	38.2284	0	3	0	0	2	3
CBT15_circR_5230	1.76706	0.0370338	up	3	9565063	9565299	-	-	ENSMUSG00000040209	ENSMUST00000041124	ensembl_havana	Q9ERQ3	170753	Zfp704	zinc finger protein 704 [Source:MGI Symbol;Acc:MGI:2180715]	exon start=circRNA start	exon end=circRNA end	9565064-9565299 exon:ENSMUSE00000310517	37.5011	0	62.3562	0	0	0	3	0	5	0	0	0
CBT15_circR_6846	-1.45638726551944	0.0411714	down	6	99428788	99435345	-	mm9_circ_015271:circbase	ENSMUSG00000030067	ENSMUST00000113322	ensembl	P58462	108655	Foxp1	Mus musculus forkhead box P1 (Foxp1), transcript variant 4, mRNA. [Source:RefSeq mRNA;Acc:NM_001347345]	exon start!=circRNA start	exon end=circRNA end	-	0	37.2604	0	0	26.2701	25.4856	0	3	0	0	2	2
CBT15_circR_7435	-1.45638726551944	0.0411714	down	8	121974426	121978754	+	-	ENSMUSG00000025316	ENSMUST00000026354	havana	Q8VBU8	53325	Banp	Protein BANP [Source:UniProtKB/Swiss-Prot;Acc:Q8VBU8]	exon start=circRNA start	exon end=circRNA end	121974427-121974565 exon:ENSMUSE00001219510|121975900-121975991 exon:ENSMUSE00000605766|121978555-121978754 exon:ENSMUSE00000605765	0	37.2604	0	0	26.2701	25.4856	0	3	0	0	2	2
CBT15_circR_8204	1.76716	0.0383153	up	9	83988775	84012619	+	mm9_circ_009629:circbase	ENSMUSG00000032263	ENSMUST00000034801	ensembl	Q6P3A8	12040	Bckdhb	2-oxoisovalerate dehydrogenase subunit beta, mitochondrial [Source:UniProtKB/Swiss-Prot;Acc:Q6P3A8]	exon start=circRNA start	exon end=circRNA end	83988776-83988909 exon:ENSMUSE00000218214|83989141-83989296 exon:ENSMUSE00000218216|83991714-83991822 exon:ENSMUSE00000218221|84010254-84010351 exon:ENSMUSE00000218219|84012509-84012619 exon:ENSMUSE00000218218	25.0008	0	74.8275	0	0	0	2	0	6	0	0	0
CBT15_circR_7610	1.85467	0.0376104	up	8	64811679	64834568	-	mm9_circ_016108:circbase	ENSMUSG00000031605	ENSMUST00000034017	ensembl_havana	Q8JZP3	77113	Klhl2	Kelch-like protein 2 [Source:UniProtKB/Swiss-Prot;Acc:Q8JZP3]	exon start=circRNA start	exon end=circRNA end	64811680-64811801 exon:ENSMUSE00000683316|64822991-64823097 exon:ENSMUSE00000582120|64834443-64834568 exon:ENSMUSE00000582121	37.5011	0	74.8275	0	0	0	3	0	6	0	0	0
CBT15_circR_6156	2.10178	0.0461525	up	5	21278044	21281602	+	-	ENSMUSG00000039934	ENSMUST00000036031	ensembl_havana	Q3TCV3	212167	Gsap	Gamma-secretase-activating protein Gamma-secretase-activating protein 16 kDa C-terminal form [Source:UniProtKB/Swiss-Prot;Acc:Q3TCV3]	exon start=circRNA start	exon end=circRNA end	21278045-21278140 exon:ENSMUSE00000291583|21280996-21281066 exon:ENSMUSE00000291573|21281508-21281602 exon:ENSMUSE00000552701	37.5011	62.1006	87.2987	0	52.5402	0	3	5	7	0	4	0
CBT15_circR_1300	-2.04160381441058	0.0442375	down	11	60747865	60749589	-	-	ENSMUSG00000002814	ENSMUST00000002891	ensembl_havana	O70157	21975	Top3a	topoisomerase (DNA) III alpha [Source:MGI Symbol;Acc:MGI:1197527]	exon start=circRNA start	exon end=circRNA end	60747866-60748031 exon:ENSMUSE00000106101|60748112-60748225 exon:ENSMUSE00000106095|60749166-60749295 exon:ENSMUSE00000106103|60749404-60749589 exon:ENSMUSE00000106098	0	0	37.4137	0	65.6752	25.4856	0	0	3	0	5	2
CBT15_circR_5721	-2.01907563365054	0.0455285	down	4	8169595	8189392	-	-	ENSMUSG00000041261	ENSMUST00000066674	ensembl_havana	P28651	12319	Car8	Carbonic anhydrase-related protein [Source:UniProtKB/Swiss-Prot;Acc:P28651]	exon start=circRNA start	exon end=circRNA end	8169596-8169765 exon:ENSMUSE00000440278|8183253-8183365 exon:ENSMUSE00000253653|8184584-8184632 exon:ENSMUSE00000253659|8185576-8185638 exon:ENSMUSE00000253666|8189297-8189392 exon:ENSMUSE00000253674	0	37.2604	0	0	26.2701	101.942	0	3	0	0	2	8
CBT15_circR_6106	1.93469	0.0487641	up	5	147450652	147455188	+	mm9_circ_013331:circbase	ENSMUSG00000029647	ENSMUST00000031651	ensembl_havana	Q640Q5	72587	Pan3	PAN2-PAN3 deadenylation complex subunit Pan3 [Source:UniProtKB/Swiss-Prot;Acc:Q640Q5]	exon start=circRNA start	exon end=circRNA end	147450653-147450774 exon:ENSMUSE00001305514|147453252-147453318 exon:ENSMUSE00001229462|147455118-147455188 exon:ENSMUSE00001298986	100.003	173.882	87.2987	37.7711	52.5402	0	8	14	7	3	4	0
CBT15_circR_6134	1.80297	0.0405427	up	5	150754387	150761134	+	-	ENSMUSG00000034021	ENSMUST00000016569	ensembl_havana	Q4VA53	100710	Pds5b	Mus musculus PDS5 cohesin associated factor B (Pds5b), transcript variant 2, mRNA. [Source:RefSeq mRNA;Acc:NM_001346503]	exon start=circRNA start	exon end=circRNA end	150754388-150754469 exon:ENSMUSE00000308202|150756382-150756430 exon:ENSMUSE00000308194|150758672-150758811 exon:ENSMUSE00000308319|150761019-150761134 exon:ENSMUSE00001222496	62.5019	0	49.885	0	0	0	5	0	4	0	0	0
CBT15_circR_3053	-1.55722298989848	0.0469168	down	16	43569680	43577748	+	mm9_circ_017140:circbase	ENSMUSG00000022708	ENSMUST00000079441	ensembl	Q8K0L9	56490	Zbtb20	zinc finger and BTB domain containing 20 [Source:MGI Symbol;Acc:MGI:1929213]	exon start=circRNA start	exon end=circRNA end	43569681-43569781 exon:ENSMUSE00000361883|43571734-43571791 exon:ENSMUSE00001278851|43577030-43577193 exon:ENSMUSE00001377982|43577561-43577748 exon:ENSMUSE00001247051	0	0	24.9425	37.7711	26.2701	0	0	0	2	3	2	0
CBT15_circR_2600	-1.39621186265645	0.0465376	down	15	12136395	12184166	+	-	ENSMUSG00000022201	ENSMUST00000122941	ensembl_havana	O88532	22763	Zfr	zinc finger RNA binding protein [Source:MGI Symbol;Acc:MGI:1341890]	exon start=circRNA start	exon end!=circRNA end	-	0	37.2604	0	25.1807	26.2701	0	0	3	0	2	2	0
CBT15_circR_7596	1.59664	0.0449686	up	8	47899435	47900856	-	mm9_circ_013863:circbase	ENSMUSG00000031563	ENSMUST00000057561	ensembl_havana	Q6NXJ0	52357	Wwc2	WW, C2 and coiled-coil domain containing 2 [Source:MGI Symbol;Acc:MGI:1261872]	exon start=circRNA start	exon end=circRNA end	47899436-47899512 exon:ENSMUSE00000401774|47900653-47900856 exon:ENSMUSE00000414648	50.0015	0	37.4137	0	0	0	4	0	3	0	0	0
CBT15_circR_6373	-1.01037166988165	0.0346528	down	5	73194985	73221072	-	mm9_circ_007752:circbase	ENSMUSG00000070733	ENSMUST00000101127	havana	Q80XD5	72313	Fryl	FRY like transcription coactivator [Source:HGNC Symbol;Acc:HGNC:29127]	exon start=circRNA start	exon end=circRNA end	73194986-73195113 exon:ENSMUSE00000696294|73220908-73221072 exon:ENSMUSE00001303646	50.0015	235.982	74.8275	176.265	157.621	165.657	4	19	6	14	12	13
CBT15_circR_7091	-1.78013693912925	0.0499077	down	7	27129195	27130435	+	-	ENSMUSG00000052974	ENSMUST00000003100	ensembl_havana	P33267	13107	Cyp2f2	Cytochrome P450 2F2 [Source:UniProtKB/Swiss-Prot;Acc:P33267]	exon start!=circRNA start	exon end=circRNA end	-	0	49.6805	0	25.1807	39.4051	0	0	4	0	2	3	0
CBT15_circR_6938	1.24346	0.0438975	up	7	121052086	121057399	+	mm9_circ_008117:circbase	ENSMUSG00000030876	ENSMUST00000033163	ensembl_havana	Q9EPL4	59052	Mettl9	Methyltransferase-like protein 9 [Source:UniProtKB/Swiss-Prot;Acc:Q9EPL4]	exon start=circRNA start	exon end=circRNA end	121052087-121052296 exon:ENSMUSE00000204580|121057215-121057399 exon:ENSMUSE00000204578	162.505	198.722	249.425	37.7711	39.4051	127.428	13	16	20	3	3	10

## Sheet: BPD VS MNC
running_number	logFC	Pvalue	regulation	chrom	start	end	strand	circBase	best gene	best transcript	gene source	uniprot	entrez	symbol	description	circRNA start ? ref exon start	circRNA end ? ref exon end	perfect exon/Intron info	H|T_BPDN1 srpbm	H|T_BPDN2 srpbm	H|T_BPDN3 srpbm	F|T_BPD1 srpbm	F|T_BPD2 srpbm	F|T_BPD3 srpbm	H|T_BPDN1 count	H|T_BPDN2 count	H|T_BPDN3 count	F|T_BPD1 count	F|T_BPD2 count	F|T_BPD3 count
CBT15_circR_4104	3.80144	4.91784e-07	up	19	58263911	58270163	-	-	ENSMUSG00000025089	ENSMUST00000026076	havana	P97785	14585	Gfra1	GDNF family receptor alpha-1 [Source:UniProtKB/Swiss-Prot;Acc:P97785]	exon start=circRNA start	exon end=circRNA end	58263912-58264093 exon:ENSMUSE00000290394|58266999-58267133 exon:ENSMUSE00000290418|58270054-58270163 exon:ENSMUSE00000290445	0	0	0	75.0023	111.781	99.7699	0	0	0	6	9	8
CBT15_circR_8403	4.7676	6.8572e-07	up	X	69544408	69545269	+	mm9_circ_006013:circbase	ENSMUSG00000031189	ENSMUST00000033532	ensembl_havana	O55112	14266	Aff2	AF4/FMR2 family member 2 [Source:UniProtKB/Swiss-Prot;Acc:O55112]	exon start=circRNA start	exon end=circRNA end	69544409-69545269 exon:ENSMUSE00001244262	0	0	0	100.003	372.604	124.712	0	0	0	8	30	10
CBT15_circR_1944	3.54624	3.77233e-06	up	12	85863563	85879475	+	-	ENSMUSG00000012609	ENSMUST00000040179	ensembl_havana	Q8CHB8	320244	Ttll5	tubulin tyrosine ligase-like family, member 5 [Source:MGI Symbol;Acc:MGI:2443657]	exon start=circRNA start	exon end=circRNA end	85863564-85863633 exon:ENSMUSE00001302309|85864525-85864609 exon:ENSMUSE00001266162|85876491-85876592 exon:ENSMUSE00000653285|85878387-85878478 exon:ENSMUSE00000653284|85879368-85879475 exon:ENSMUSE00000653283	0	0	0	87.5027	74.5207	87.2987	0	0	0	7	6	7
CBT15_circR_6463	3.9724	7.28395e-06	up	6	115969875	115970248	-	mm9_circ_004960:circbase	ENSMUSG00000030123	ENSMUST00000015511	ensembl_havana	Q3UH93	67784	Plxnd1	plexin D1 [Source:MGI Symbol;Acc:MGI:2154244]	exon start=circRNA start	exon end=circRNA end	115969876-115969969 exon:ENSMUSE00000306698|115970159-115970248 exon:ENSMUSE00000306705	0	0	0	25.0008	124.201	187.069	0	0	0	2	10	15
CBT15_circR_4554	3.28813	8.3206e-06	up	2	18284622	18317000	-	-	ENSMUSG00000026740	ENSMUST00000028072	havana	Q61712	13418	Dnajc1	DnaJ homolog subfamily C member 1 [Source:UniProtKB/Swiss-Prot;Acc:Q61712]	exon start=circRNA start	exon end=circRNA end	18284623-18284786 exon:ENSMUSE00001205906|18293954-18294044 exon:ENSMUSE00001302660|18306973-18307066 exon:ENSMUSE00001211851|18307915-18308012 exon:ENSMUSE00001265020|18308784-18308949 exon:ENSMUSE00001291426|18316899-18317000 exon:ENSMUSE00001209348	0	0	0	50.0015	62.1006	87.2987	0	0	0	4	5	7
CBT15_circR_7103	3.01582	1.11636e-05	up	7	29225039	29225867	-	-	ENSMUSG00000046410	ENSMUST00000085818	ensembl_havana	Q3TQ68	52150	Kcnk6	potassium inwardly-rectifying channel, subfamily K, member 6 [Source:MGI Symbol;Acc:MGI:1891291]	exon start!=circRNA start	exon end=circRNA end	-	0	0	0	25.0008	62.1006	62.3562	0	0	0	2	5	5
CBT15_circR_4472	3.01958	1.24879e-05	up	2	166834470	166836457	+	-	ENSMUSG00000074582	ENSMUST00000099078	ensembl_havana	A2A5R2	99371	Arfgef2	Brefeldin A-inhibited guanine nucleotide-exchange protein 2 [Source:UniProtKB/Swiss-Prot;Acc:A2A5R2]	exon start=circRNA start	exon end=circRNA end	166834471-166834617 exon:ENSMUSE00000639107|166835613-166835792 exon:ENSMUSE00000639106|166836202-166836457 exon:ENSMUSE00000639105	0	0	0	50.0015	62.1006	49.885	0	0	0	4	5	4
CBT15_circR_4415	-3.78727423429173	1.30373e-05	down	2	156745834	156749356	+	mm9_circ_015028:circbase	ENSMUSG00000061689	ENSMUST00000000094	havana	B1AZP2	228836	Dlgap4	Disks large-associated protein 4 [Source:UniProtKB/Swiss-Prot;Acc:B1AZP2]	exon start=circRNA start	exon end=circRNA end	156745835-156746196 exon:ENSMUSE00001262215|156748023-156748102 exon:ENSMUSE00001276377|156748944-156749356 exon:ENSMUSE00001312427	52.4726	109.53	82.3719	0	37.2604	0	4	8	6	0	3	0
CBT15_circR_4887	-3.61011078088192	1.40624e-05	down	3	103330079	103331807	+	-	ENSMUSG00000033014	ENSMUST00000029444	ensembl_havana	Q99PP7	94093	Trim33	tripartite motif containing 33 [Source:HGNC Symbol;Acc:HGNC:16290]	exon start=circRNA start	exon end=circRNA end	103330080-103330244 exon:ENSMUSE00000496625|103331610-103331807 exon:ENSMUSE00000498453	65.5908	95.8384	54.9146	0	37.2604	0	5	7	4	0	3	0
CBT15_circR_7361	-3.91393881764901	2.56101e-05	down	8	108792201	108794969	+	-	ENSMUSG00000038872	ENSMUST00000043896	ensembl_havana	E9QMD3	11906	Zfhx3	zinc finger homeobox 3 [Source:MGI Symbol;Acc:MGI:99948]	exon start=circRNA start	exon end=circRNA end	108792202-108794969 exon:ENSMUSE00000341336	157.418	41.0736	96.1005	0	0	0	12	3	7	0	0	0
CBT15_circR_176	-3.20634290138898	3.81651e-05	down	1	160700711	160702460	-	-	ENSMUSG00000026721	ENSMUST00000028049	ensembl_havana	A6H6A9	29809	Rabgap1l	Rab GTPase-activating protein 1-like [Source:UniProtKB/Swiss-Prot;Acc:A6H6A9]	exon start=circRNA start	exon end=circRNA end	160700712-160700878 exon:ENSMUSE00000508134|160702358-160702460 exon:ENSMUSE00000451904	39.3545	41.0736	82.3719	0	0	0	3	3	6	0	0	0
CBT15_circR_2262	-3.20634290138898	3.81651e-05	down	13	99228318	99234288	+	-	ENSMUSG00000050919	ENSMUST00000056558	ensembl_havana	Q6NS86	238803	Zfp366	zinc finger protein 366 [Source:MGI Symbol;Acc:MGI:2178429]	exon start=circRNA start	exon end=circRNA end	99228319-99229655 exon:ENSMUSE00000449953|99234097-99234288 exon:ENSMUSE00000569472	39.3545	41.0736	82.3719	0	0	0	3	3	6	0	0	0
CBT15_circR_2393	2.77854	7.64991e-05	up	14	31482790	31487741	-	-	ENSMUSG00000021891	ENSMUST00000055303	ensembl_havana	Q8BVH9	67011	Mettl6	methyltransferase like 6	exon start=circRNA start	exon end=circRNA end	31482791-31482932 exon:ENSMUSE00000121655|31487571-31487741 exon:ENSMUSE00000121658	0	0	0	25.0008	74.5207	37.4137	0	0	0	2	6	3
CBT15_circR_2148	-3.00565041633974	7.91868e-05	down	13	56723428	56728629	+	-	ENSMUSG00000021540	ENSMUST00000069557	havana	P97454	17129	Smad5	Mothers against decapentaplegic homolog 5 [Source:UniProtKB/Swiss-Prot;Acc:P97454]	exon start=circRNA start	exon end=circRNA end	56723429-56723996 exon:ENSMUSE00001301856|56727404-56727655 exon:ENSMUSE00001279408|56728510-56728629 exon:ENSMUSE00001211209	39.3545	54.7648	41.1859	0	37.2604	0	3	4	3	0	3	0
CBT15_circR_3511	2.99872	8.31621e-05	up	17	81647808	81649638	-	mm9_circ_014302:circbase	ENSMUSG00000054640	ENSMUST00000086538	ensembl	G3X9J1	20541	Slc8a1	solute carrier family 8 (sodium/calcium exchanger), member 1	exon start=circRNA start	exon end!=circRNA end	-	0	0	0	62.5019	86.9408	37.4137	0	0	0	5	7	3
CBT15_circR_1021	-3.09794846638037	8.41738e-05	down	11	106679548	106685248	-	-	ENSMUSG00000020717	ENSMUST00000068021	havana	Q08481	18613	Pecam1	platelet/endothelial cell adhesion molecule 1 [Source:MGI Symbol;Acc:MGI:97537]	exon start=circRNA start	exon end=circRNA end	106679549-106679611 exon:ENSMUSE00000108537|106681032-106681085 exon:ENSMUSE00000108535|106682880-106682953 exon:ENSMUSE00000108521|106683593-106683620 exon:ENSMUSE00000108547|106684228-106684335 exon:ENSMUSE00000108539|106684961-106685248 exon:ENSMUSE00000325450	39.3545	41.0736	68.6432	0	0	24.9425	3	3	5	0	0	2
CBT15_circR_2495	-3.11792971211076	9.43778e-05	down	14	70901488	70926072	+	-	ENSMUSG00000022103	ENSMUST00000022699	ensembl_havana	O08842	14586	Gfra2	glial cell line derived neurotrophic factor family receptor alpha 2	exon start=circRNA start	exon end=circRNA end	70901489-70901572 exon:ENSMUSE00000457644|70925718-70926072 exon:ENSMUSE00000123631	39.3545	68.456	41.1859	0	24.8402	24.9425	3	5	3	0	2	2
CBT15_circR_1737	-2.90405165347994	0.00015746	down	12	3835026	3873428	+	-	ENSMUSG00000020661	ENSMUST00000020991	ensembl_havana	O88508	13435	Dnmt3a	DNA (cytosine-5)-methyltransferase 3A [Source:UniProtKB/Swiss-Prot;Acc:O88508]	exon start=circRNA start	exon end=circRNA end	3835027-3835260 exon:ENSMUSE00001232213|3849635-3849739 exon:ENSMUSE00001286764|3865985-3866252 exon:ENSMUSE00001308835|3872835-3872878 exon:ENSMUSE00000107590|3873282-3873428 exon:ENSMUSE00000234504	52.4726	27.3824	54.9146	0	24.8402	0	4	2	4	0	2	0
CBT15_circR_7616	-2.65166929950622	0.000172597	down	8	68120747	68121628	-	-	ENSMUSG00000030465	ENSMUST00000212960	havana	Q78V97	234353	Psd3	pleckstrin and Sec7 domain containing 3 [Source:MGI Symbol;Acc:MGI:1918215]	exon start=circRNA start	exon end=circRNA end	68120748-68121628 exon:ENSMUSE00001392505	39.3545	41.0736	27.4573	0	0	0	3	3	2	0	0	0
CBT15_circR_4906	3.03109	0.000174021	up	3	106566044	106573841	+	-	ENSMUSG00000027900	ENSMUST00000029507	ensembl_havana	Q9CR48	67171	Dram2	DNA damage-regulated autophagy modulator protein 2 [Source:UniProtKB/Swiss-Prot;Acc:Q9CR48]	exon start=circRNA start	exon end!=circRNA end	-	0	0	0	75.0023	49.6805	87.2987	0	0	0	6	4	7
CBT15_circR_61	2.33543	0.000200715	up	1	127551325	127552804	-	-	ENSMUSG00000026347	ENSMUST00000027585	havana	Q8C996	72160	Tmem163	Transmembrane protein 163 [Source:UniProtKB/Swiss-Prot;Acc:Q8C996]	exon start=circRNA start	exon end=circRNA end	127551326-127551417 exon:ENSMUSE00000321163|127552761-127552804 exon:ENSMUSE00000321168	0	0	0	25.0008	49.6805	37.4137	0	0	0	2	4	3
CBT15_circR_3728	2.33543	0.000200715	up	18	61967988	61978072	+	-	ENSMUSG00000045629	ENSMUST00000051720	ensembl	Q6DFU9	225608	Sh3tc2	SH3 domain and tetratricopeptide repeats 2	exon start=circRNA start	exon end=circRNA end	61967989-61968116 exon:ENSMUSE00000340004|61970942-61971047 exon:ENSMUSE00000401944|61973287-61973430 exon:ENSMUSE00000358532|61974449-61974647 exon:ENSMUSE00000356259|61975569-61975642 exon:ENSMUSE00000396900|61977877-61978072 exon:ENSMUSE00000333106	0	0	0	25.0008	49.6805	37.4137	0	0	0	2	4	3
CBT15_circR_5185	-2.95355700849807	0.000201026	down	3	88999727	89007877	+	-	ENSMUSG00000028053	ENSMUST00000090933	ensembl	Q99MY8	192195	Ash1l	Histone-lysine N-methyltransferase ASH1L [Source:UniProtKB/Swiss-Prot;Acc:Q99MY8]	exon start!=circRNA start	exon end=circRNA end	-	78.709	41.0736	27.4573	0	0	0	6	3	2	0	0	0
CBT15_circR_455	-2.88382127214792	0.000301913	down	1	66762047	66807604	-	-	ENSMUSG00000026004	ENSMUST00000068168	ensembl_havana	Q5DTI6	68691	Kansl1l	Mus musculus KAT8 regulatory NSL complex subunit 1-like (Kansl1l), transcript variant 3, mRNA. [Source:RefSeq mRNA;Acc:NM_001357156]	exon start=circRNA start	exon end!=circRNA end	-	52.4726	54.7648	27.4573	0	0	24.9425	4	4	2	0	0	2
CBT15_circR_1301	-3.31426660861268	0.000322393	down	11	6113242	6125561	-	-	ENSMUSG00000053838	ENSMUST00000066496	ensembl_havana	B0FTY3	209586	Nudcd3	NudC domain-containing protein 3 [Source:UniProtKB/Swiss-Prot;Acc:Q8R1N4]	exon start=circRNA start	exon end=circRNA end	6113243-6113431 exon:ENSMUSE00000451661|6125418-6125561 exon:ENSMUSE00000451653	78.709	95.8384	27.4573	0	37.2604	24.9425	6	7	2	0	3	2
CBT15_circR_931	-2.63923046475872	0.000382231	down	10	92868722	92878612	-	-	ENSMUSG00000020014	ENSMUST00000168110	havana	Q8C6S9	380654	Cfap54	Mus musculus cilia and flagella associated protein 54 (Cfap54), mRNA. [Source:RefSeq mRNA;Acc:NM_001347060]	exon start=circRNA start	exon end=circRNA end	92868723-92868864 exon:ENSMUSE00000911745|92870587-92870685 exon:ENSMUSE00000896576|92874945-92875032 exon:ENSMUSE00000900188|92875939-92876044 exon:ENSMUSE00000882739|92878457-92878612 exon:ENSMUSE00000882581	39.3545	41.0736	27.4573	0	37.2604	0	3	3	2	0	3	0
CBT15_circR_7924	-2.63923046475872	0.000382231	down	9	34983620	34985144	-	-	ENSMUSG00000032036	ENSMUST00000045091	havana	Q8BR86	67703	Kirrel3	Kin of IRRE-like protein 3 Processed kin of IRRE-like protein 3 [Source:UniProtKB/Swiss-Prot;Acc:Q8BR86]	transcript start<=circRNA start	transcript end>=circRNA end	-	39.3545	41.0736	27.4573	0	37.2604	0	3	3	2	0	3	0
CBT15_circR_1160	-2.62103611940771	0.000484837	down	11	29482108	29498612	+	-	ENSMUSG00000032740	ENSMUST00000040182	ensembl_havana	Q5SNZ0	108686	Ccdc88a	Girdin [Source:UniProtKB/Swiss-Prot;Acc:Q5SNZ0]	exon start=circRNA start	exon end=circRNA end	29482109-29482386 exon:ENSMUSE00000402171|29482598-29482741 exon:ENSMUSE00000281329|29485825-29486011 exon:ENSMUSE00000281319|29489582-29489727 exon:ENSMUSE00000281309|29493700-29493792 exon:ENSMUSE00000281297|29493879-29494093 exon:ENSMUSE00000281288|29498409-29498612 exon:ENSMUSE00000281281	65.5908	27.3824	27.4573	0	0	0	5	2	2	0	0	0
CBT15_circR_4602	-2.51850500556608	0.000507087	down	2	25952677	25966948	-	-	ENSMUSG00000026933	ENSMUST00000091268	ensembl	A0A0A0MQE5	227634	Camsap1	Calmodulin-regulated spectrin-associated protein 1 [Source:UniProtKB/Swiss-Prot;Acc:A2AHC3]	exon start=circRNA start	exon end=circRNA end	25952678-25952819 exon:ENSMUSE00000569096|25956247-25956327 exon:ENSMUSE00001315537|25965663-25965824 exon:ENSMUSE00001223933|25966686-25966948 exon:ENSMUSE00001264038	26.2363	54.7648	27.4573	0	24.8402	0	2	4	2	0	2	0
CBT15_circR_5490	-3.38506726967508	0.000566005	down	4	138096751	138097359	+	-	ENSMUSG00000028760	ENSMUST00000058133	havana	Q80XI3	230861	Eif4g3	Mus musculus eukaryotic translation initiation factor 4 gamma, 3 (Eif4g3), transcript variant 4, mRNA. [Source:RefSeq mRNA;Acc:NM_001355699]	exon start=circRNA start	exon end=circRNA end	138096752-138096931 exon:ENSMUSE00000383740|138097245-138097359 exon:ENSMUSE00000287090	78.709	82.1472	109.829	0	37.2604	37.4137	6	6	8	0	3	3
CBT15_circR_3214	-3.08532232648371	0.000627163	down	17	24088003	24111117	-	-	ENSMUSG00000024122	ENSMUST00000052462	havana	Q9Z2A0	18607	Pdpk1	3-phosphoinositide-dependent protein kinase 1 [Source:UniProtKB/Swiss-Prot;Acc:Q9Z2A0]	exon start=circRNA start	exon end=circRNA end	24088004-24088221 exon:ENSMUSE00000138514|24091421-24091594 exon:ENSMUSE00001274527|24093191-24093287 exon:ENSMUSE00001307301|24093540-24093608 exon:ENSMUSE00001303066|24098094-24098169 exon:ENSMUSE00001206249|24100811-24100908 exon:ENSMUSE00001236743|24101602-24101746 exon:ENSMUSE00000138522|24106827-24106964 exon:ENSMUSE00000138518|24107229-24107271 exon:ENSMUSE00000138508|24110848-24111117 exo…	39.3545	41.0736	68.6432	0	49.6805	0	3	3	5	0	4	0
CBT15_circR_5721	-2.38971610047225	0.000786979	down	4	8169595	8189392	-	-	ENSMUSG00000041261	ENSMUST00000066674	ensembl_havana	P28651	12319	Car8	Carbonic anhydrase-related protein [Source:UniProtKB/Swiss-Prot;Acc:P28651]	exon start=circRNA start	exon end=circRNA end	8169596-8169765 exon:ENSMUSE00000440278|8183253-8183365 exon:ENSMUSE00000253653|8184584-8184632 exon:ENSMUSE00000253659|8185576-8185638 exon:ENSMUSE00000253666|8189297-8189392 exon:ENSMUSE00000253674	26.2363	27.3824	41.1859	0	37.2604	0	2	2	3	0	3	0
CBT15_circR_7712	-1.11909588865363	0.00123586	down	8	90932248	90933862	+	mm9_circ_003987:circbase	ENSMUSG00000056608	ENSMUST00000048665	ensembl_havana	Q8BYH8	109151	Chd9	Chromodomain-helicase-DNA-binding protein 9 [Source:UniProtKB/Swiss-Prot;Acc:Q8BYH8]	exon start=circRNA start	exon end=circRNA end	90932249-90933862 exon:ENSMUSE00000413880	406.663	424.427	343.216	112.503	248.402	249.425	31	31	25	9	20	20
CBT15_circR_7963	2.23521	0.0028021	up	9	44828783	44829271	-	mm9_circ_007127:circbase	ENSMUSG00000002028	ENSMUST00000002095	ensembl_havana	P55200	214162	Kmt2a	Mus musculus lysine (K)-specific methyltransferase 2A (Kmt2a), transcript variant 1, mRNA. [Source:RefSeq mRNA;Acc:NM_001357549]	exon start=circRNA start	exon end=circRNA end	44828784-44828890 exon:ENSMUSE00001223098|44829078-44829271 exon:ENSMUSE00001267098	0	0	0	25.0008	62.1006	24.9425	0	0	0	2	5	2
CBT15_circR_5272	-3.20841357682994	0.00379544	down	4	103319021	103331379	+	-	ENSMUSG00000035069	ENSMUST00000035780	ensembl_havana	Q9D8H7	67013	Oma1	Metalloendopeptidase OMA1, mitochondrial [Source:UniProtKB/Swiss-Prot;Acc:Q9D8H7]	exon start=circRNA start	exon end=circRNA end	103319022-103319528 exon:ENSMUSE00000276942|103321640-103321868 exon:ENSMUSE00000276932|103325019-103325192 exon:ENSMUSE00001216528|103325293-103325400 exon:ENSMUSE00001244089|103328838-103328966 exon:ENSMUSE00000276921|103331305-103331379 exon:ENSMUSE00001206773	39.3545	95.8384	96.1005	0	62.1006	0	3	7	7	0	5	0
CBT15_circR_7698	1.61429	0.00231257	up	8	8639205	8639489	-	-	ENSMUSG00000001300	ENSMUST00000001319	ensembl_havana	Q4FJM3	13642	Efnb2	Ephrin-B2 [Source:UniProtKB/Swiss-Prot;Acc:P52800]	exon start=circRNA start	exon end=circRNA end	8639206-8639489 exon:ENSMUSE00000147334	354.19	109.53	164.744	400.012	1018.45	972.757	27	8	12	32	82	78
CBT15_circR_1600	2.77018	0.00389974	up	12	102807899	102812843	-	-	ENSMUSG00000041702	ENSMUST00000045652	havana	Q8CFE5	238386	Btbd7	BTB (POZ) domain containing 7	exon start=circRNA start	exon end=circRNA end	102807900-102808060 exon:ENSMUSE00000259125|102811120-102811195 exon:ENSMUSE00000259130|102812635-102812843 exon:ENSMUSE00000259139	26.2363	0	0	62.5019	62.1006	87.2987	2	0	0	5	5	7
CBT15_circR_303	2.51313	0.004364	up	1	192337399	192337829	+	-	ENSMUSG00000058248	ENSMUST00000078470	ensembl_havana	Q3UHC9	16510	Kcnh1	potassium voltage-gated channel subfamily H member 1 [Source:HGNC Symbol;Acc:HGNC:6250]	exon start=circRNA start	exon end=circRNA end	192337400-192337829 exon:ENSMUSE00000483479	26.2363	0	27.4573	75.0023	136.621	99.7699	2	0	2	6	11	8
CBT15_circR_1173	-3.27180289350478	0.00450096	down	11	30219578	30219772	-	-	ENSMUSG00000020315	ENSMUST00000006629	havana	Q8BQ35	20742	Sptbn1	Spectrin beta chain, non-erythrocytic 1 [Source:UniProtKB/Swiss-Prot;Acc:Q62261]	exon start=circRNA start	exon end=circRNA end	30219579-30219772 exon:ENSMUSE00000593002	118.063	95.8384	68.6432	0	0	62.3562	9	7	5	0	0	5
CBT15_circR_4450	2.90714	0.00453041	up	2	163636810	163639327	-	-	ENSMUSG00000017707	ENSMUST00000017851	ensembl_havana	Q9QZI9	26943	Serinc3	Serine incorporator 3 [Source:UniProtKB/Swiss-Prot;Acc:Q9QZI9]	exon start=circRNA start	exon end=circRNA end	163636811-163637004 exon:ENSMUSE00000171572|163639166-163639327 exon:ENSMUSE00001252910	0	0	27.4573	87.5027	136.621	49.885	0	0	2	7	11	4
CBT15_circR_1320	-2.55714837227694	0.00536765	down	11	62146305	62156640	+	-	ENSMUSG00000042331	ENSMUST00000092415	ensembl_havana	A0A0J9YUR2	432572	Specc1	sperm antigen with calponin homology and coiled-coil domains 1 [Source:MGI Symbol;Acc:MGI:2442356]	exon start=circRNA start	exon end=circRNA end	62146306-62146451 exon:ENSMUSE00000589541|62147568-62147668 exon:ENSMUSE00000589540|62151870-62151951 exon:ENSMUSE00000589539|62156487-62156640 exon:ENSMUSE00000589538	65.5908	41.0736	41.1859	0	37.2604	37.4137	5	3	3	0	3	3
CBT15_circR_8005	2.74091	0.00545641	up	9	55838119	55859918	-	mm9_circ_018725:circbase	ENSMUSG00000034007	ENSMUST00000037408	ensembl	F8VQ70	244891	Scaper	S phase cyclin A-associated protein in the ER [Source:MGI Symbol;Acc:MGI:1925976]	exon start=circRNA start	exon end=circRNA end	55838120-55838260 exon:ENSMUSE00001013097|55858081-55858192 exon:ENSMUSE00001005996|55858408-55858525 exon:ENSMUSE00000584390|55858999-55859074 exon:ENSMUSE00000584391|55859748-55859918 exon:ENSMUSE00000584392	0	41.0736	27.4573	112.503	211.142	124.712	0	3	2	9	17	10
CBT15_circR_3445	-2.25645663905553	0.00453467	down	17	67287390	67287932	-	-	ENSMUSG00000033278	ENSMUST00000037974	havana	P28828	19274	Ptprm	protein tyrosine phosphatase, receptor type, M	transcript start<=circRNA start	transcript end>=circRNA end	-	223.009	205.368	274.573	150.005	62.1006	37.4137	17	15	20	12	5	3
CBT15_circR_3176	2.03576	0.00532948	up	17	10238892	10282981	-	-	ENSMUSG00000062078	ENSMUST00000042296	ensembl	Q9QYS9	19317	Qk	quaking	exon start=circRNA start	exon end=circRNA end	10238893-10239036 exon:ENSMUSE00000269810|10273947-10274063 exon:ENSMUSE00000269819|10282839-10282981 exon:ENSMUSE00000269846	0	0	0	25.0008	37.2604	49.885	0	0	0	2	3	4
CBT15_circR_2224	2.50602	0.00594804	up	13	93341755	93356079	+	mm9_circ_010239:circbase	ENSMUSG00000007617	ENSMUST00000060490	havana	Q3UVL6	26556	Homer1	Homer protein homolog 1 [Source:UniProtKB/Swiss-Prot;Acc:Q9Z2Y3]	exon start=circRNA start	exon end=circRNA end	93341756-93341912 exon:ENSMUSE00000611902|93346569-93346700 exon:ENSMUSE00000611901|93349205-93349297 exon:ENSMUSE00000611900|93355940-93356079 exon:ENSMUSE00000466987	26.2363	0	0	25.0008	86.9408	49.885	2	0	0	2	7	4
CBT15_circR_3527	1.85912	0.00564153	up	17	86809357	86809789	+	-	ENSMUSG00000024140	ENSMUST00000024954	ensembl	P97481	13819	Epas1	endothelial PAS domain protein 1	exon start=circRNA start	exon end=circRNA end	86809358-86809476 exon:ENSMUSE00000138654|86809584-86809789 exon:ENSMUSE00000138643	0	0	0	25.0008	37.2604	37.4137	0	0	0	2	3	3
CBT15_circR_7536	1.89536	0.00475143	up	8	3258382	3258934	-	-	ENSMUSG00000005534	ENSMUST00000091291	ensembl_havana	P15208	16337	Insr	Insulin receptor Insulin receptor subunit alpha Insulin receptor subunit beta [Source:UniProtKB/Swiss-Prot;Acc:P15208]	exon start=circRNA start	exon end=circRNA end	3258383-3258934 exon:ENSMUSE00001230539	104.945	109.53	109.829	175.005	608.586	723.332	8	8	8	14	49	58
CBT15_circR_5656	2.61455	0.00639353	up	4	53127596	53133015	-	-	ENSMUSG00000015243	ENSMUST00000030010	ensembl_havana	Q8BPY1	11303	Abca1	ATP-binding cassette, sub-family A (ABC1), member 1 [Source:MGI Symbol;Acc:MGI:99607]	exon start=circRNA start	exon end=circRNA end	53127597-53127715 exon:ENSMUSE00000409749|53128721-53128862 exon:ENSMUSE00000226974|53132922-53133015 exon:ENSMUSE00000226982	0	0	0	0	111.781	62.3562	0	0	0	0	9	5
CBT15_circR_1766	1.92012	0.00675552	up	12	4658014	4666326	+	-	ENSMUSG00000020640	ENSMUST00000062580	ensembl	B2RR82	20403	Itsn2	intersectin 2	exon start=circRNA start	exon end=circRNA end	4658015-4658190 exon:ENSMUSE00000107335|4658442-4658571 exon:ENSMUSE00000107376|4661859-4662064 exon:ENSMUSE00000107327|4664537-4664622 exon:ENSMUSE00000107363|4666160-4666326 exon:ENSMUSE00000107350	0	0	0	37.5011	37.2604	37.4137	0	0	0	3	3	3
CBT15_circR_2666	2.5522	0.00671133	up	15	35770455	35770863	+	-	ENSMUSG00000037646	ENSMUST00000048646	ensembl_havana	E9QKX5	666173	Vps13b	vacuolar protein sorting 13B	exon start=circRNA start	exon end=circRNA end	35770456-35770863 exon:ENSMUSE00000624145	0	0	0	0	74.5207	87.2987	0	0	0	0	6	7
CBT15_circR_217	2.48125	0.00715892	up	1	165911287	165913349	-	-	ENSMUSG00000026565	ENSMUST00000069609	ensembl_havana	P25425	18986	Pou2f1	POU domain, class 2, transcription factor 1 [Source:UniProtKB/Swiss-Prot;Acc:P25425]	exon start=circRNA start	exon end=circRNA end	165911288-165911476 exon:ENSMUSE00001336318|165913227-165913349 exon:ENSMUSE00001345657	0	0	0	0	74.5207	74.8275	0	0	0	0	6	6
CBT15_circR_7186	-2.87844424134846	0.00744022	down	7	61925310	61931493	-	-	ENSMUSG00000109394	ENSMUST00000207061	havana	-	319893	A230057D06Rik	RIKEN cDNA A230057D06 gene [Source:MGI Symbol;Acc:MGI:2442922]	exon start=circRNA start	exon end!=circRNA end	-	327.954	205.368	315.759	0	74.5207	99.7699	25	15	23	0	6	8
CBT15_circR_1573	2.60636	0.00751916	up	12	101646579	101694673	-	-	ENSMUSG00000021187	ENSMUST00000110047	havana	Q91XT6	74413	Tc2n	Tandem C2 domains nuclear protein [Source:UniProtKB/Swiss-Prot;Acc:Q91XT6]	exon start!=circRNA start	exon end=circRNA end	-	0	0	0	0	136.621	49.885	0	0	0	0	11	4
CBT15_circR_8276	2.41738	0.0077507	up	X	102554883	102559734	-	-	ENSMUSG00000034055	ENSMUST00000043596	ensembl_havana	P18826	18679	Phka1	Phosphorylase b kinase regulatory subunit alpha, skeletal muscle isoform [Source:UniProtKB/Swiss-Prot;Acc:P18826]	exon start=circRNA start	exon end=circRNA end	102554884-102555023 exon:ENSMUSE00000284704|102555526-102555617 exon:ENSMUSE00001265280|102559565-102559734 exon:ENSMUSE00001244394	0	0	0	0	86.9408	62.3562	0	0	0	0	7	5
CBT15_circR_2827	2.48338	0.00798708	up	15	85391637	85393506	+	-	ENSMUSG00000016541	ENSMUST00000163242	ensembl_havana	P28658	54138	Atxn10	ataxin 10	exon start=circRNA start	exon end=circRNA end	85391638-85391746 exon:ENSMUSE00000126083|85393337-85393506 exon:ENSMUSE00000126085	0	0	0	0	62.1006	99.7699	0	0	0	0	5	8
CBT15_circR_8142	2.51891	0.00893034	up	9	71515068	71555737	-	-	ENSMUSG00000092137	ENSMUST00000163998	havana	E9Q3C8,E9Q8U3,E9Q2N5,E9PZ54	-	Gcom1	-	exon start=circRNA start	exon end=circRNA end	71515069-71515169 exon:ENSMUSE00001265242|71524782-71524865 exon:ENSMUSE00001297823|71546669-71546774 exon:ENSMUSE00001211713|71548724-71548803 exon:ENSMUSE00001244073|71550179-71550307 exon:ENSMUSE00001276616|71552239-71552364 exon:ENSMUSE00001309245|71555585-71555737 exon:ENSMUSE00001302658	0	0	27.4573	25.0008	62.1006	99.7699	0	0	2	2	5	8
CBT15_circR_6286	2.40901	0.00860403	up	5	44532660	44541859	-	-	ENSMUSG00000039706	ENSMUST00000070748	ensembl_havana	O55203	16826	Ldb2	Mus musculus LIM domain binding 2 (Ldb2), transcript variant 5, mRNA. [Source:RefSeq mRNA;Acc:NM_001359070]	exon start=circRNA start	exon end=circRNA end	44532661-44532744 exon:ENSMUSE00000287674|44535038-44535160 exon:ENSMUSE00000287686|44541687-44541859 exon:ENSMUSE00000287696	0	0	0	0	99.3609	49.885	0	0	0	0	8	4
CBT15_circR_5364	3.19515	0.0094034	up	4	123384644	123389337	-	-	ENSMUSG00000028649	ENSMUST00000082108	havana	E9PVY8	11426	Macf1	microtubule-actin crosslinking factor 1 [Source:HGNC Symbol;Acc:HGNC:13664]	exon start=circRNA start	exon end=circRNA end	123384645-123384871 exon:ENSMUSE00000969486|123385455-123385686 exon:ENSMUSE00001063339|123387228-123387431 exon:ENSMUSE00001050874|123389119-123389337 exon:ENSMUSE00001020918	65.5908	0	0	125.004	124.201	187.069	5	0	0	10	10	15
CBT15_circR_8230	2.32636	0.00906205	up	9	96340201	96345893	-	-	ENSMUSG00000032412	ENSMUST00000034983	ensembl_havana	P97370	11933	Atp1b3	Sodium/potassium-transporting ATPase subunit beta-3 [Source:UniProtKB/Swiss-Prot;Acc:P97370]	exon start=circRNA start	exon end=circRNA end	96340202-96340386 exon:ENSMUSE00000219563|96343268-96343375 exon:ENSMUSE00000518338|96345765-96345893 exon:ENSMUSE00000219565	0	0	0	0	62.1006	74.8275	0	0	0	0	5	6
CBT15_circR_6711	-3.323306977177	0.00935887	down	6	47576535	47577667	-	mm9_circ_002148:circbase	ENSMUSG00000029687	ENSMUST00000081721	ensembl_havana	Q61188	14056	Ezh2	Histone-lysine N-methyltransferase EZH2 [Source:UniProtKB/Swiss-Prot;Acc:Q61188]	exon start=circRNA start	exon end=circRNA end	47576536-47576664 exon:ENSMUSE00001304807|47577544-47577667 exon:ENSMUSE00000486290	118.063	164.294	27.4573	0	62.1006	0	9	12	2	0	5	0
CBT15_circR_1418	2.61948	0.0081851	up	11	75751880	75759428	+	-	ENSMUSG00000020849	ENSMUST00000067664	ensembl_havana	Q5SS40	22627	Ywhae	tyrosine 3-monooxygenase/tryptophan 5-monooxygenase activation protein, epsilon polypeptide [Source:MGI Symbol;Acc:MGI:894689]	exon start=circRNA start	exon end=circRNA end	75751881-75752080 exon:ENSMUSE00001240635|75755574-75755680 exon:ENSMUSE00001215764|75756817-75757023 exon:ENSMUSE00001281723|75759292-75759428 exon:ENSMUSE00001310196	0	0	0	50.0015	37.2604	162.126	0	0	0	4	3	13
CBT15_circR_3638	2.20992	0.0103233	up	18	42320763	42324198	+	-	ENSMUSG00000024491	ENSMUST00000046972	ensembl	Q5SFM8	225432	Rbm27	RNA binding motif protein 27	exon start=circRNA start	exon end=circRNA end	42320764-42320917 exon:ENSMUSE00000507853|42324055-42324198 exon:ENSMUSE00000505772	0	0	0	0	62.1006	62.3562	0	0	0	0	5	5
CBT15_circR_39	2.20454	0.0105906	up	1	11265678	11266159	+	-	ENSMUSG00000048960	ENSMUST00000027056	ensembl_havana	Q3LAC4	109294	Prex2	Phosphatidylinositol 3,4,5-trisphosphate-dependent Rac exchanger 2 protein [Source:UniProtKB/Swiss-Prot;Acc:Q3LAC4]	exon start=circRNA start	exon end=circRNA end	11265679-11265745 exon:ENSMUSE00000317484|11265969-11266159 exon:ENSMUSE00000317475	0	0	0	0	74.5207	49.885	0	0	0	0	6	4
CBT15_circR_4990	2.20454	0.0105906	up	3	142839207	142853714	-	-	ENSMUSG00000004591	ENSMUST00000043812	ensembl_havana	Q8BWW9	109333	Pkn2	Serine/threonine-protein kinase N2 [Source:UniProtKB/Swiss-Prot;Acc:Q8BWW9]	exon start=circRNA start	exon end=circRNA end	142839208-142839362 exon:ENSMUSE00001216064|142853414-142853714 exon:ENSMUSE00001309758	0	0	0	0	74.5207	49.885	0	0	0	0	6	4
CBT15_circR_5131	-2.39189708450962	0.013755	down	3	75358346	75397101	-	-	ENSMUSG00000104301	ENSMUST00000193989	havana	A0A0N4SW55,A0A0N4SUK7,A0A0N4SUR4	213248	Wdr49	WD repeat domain 49 [Source:MGI Symbol;Acc:MGI:3645287]	exon start=circRNA start	exon end=circRNA end	75358347-75358462 exon:ENSMUSE00001336607|75381915-75382079 exon:ENSMUSE00001338927|75396868-75397101 exon:ENSMUSE00001371780	26.2363	41.0736	82.3719	0	37.2604	37.4137	2	3	6	0	3	3
CBT15_circR_1489	2.9014	0.0136989	up	11	85898492	85899897	+	-	ENSMUSG00000000094	ENSMUST00000000096	ensembl	Q8BSY3	21387	Tbx4	T-box 4 [Source:MGI Symbol;Acc:MGI:102556]	exon start=circRNA start	exon end=circRNA end	85898493-85898612 exon:ENSMUSE00001297176|85899750-85899897 exon:ENSMUSE00000363988	52.4726	0	0	112.503	161.462	62.3562	4	0	0	9	13	5
CBT15_circR_1373	2.04427	0.0130811	up	11	69735233	69735530	+	-	ENSMUSG00000005198	ENSMUST00000058470	havana	P08775	20020	Polr2a	DNA-directed RNA polymerase II subunit RPB1 [Source:UniProtKB/Swiss-Prot;Acc:P08775]	transcript start<=circRNA start	transcript end>=circRNA end	-	0	0	0	0	62.1006	49.885	0	0	0	0	5	4
CBT15_circR_7703	2.04427	0.0130811	up	8	86665690	86673069	+	-	ENSMUSG00000047866	ENSMUST00000034141	ensembl_havana	Q9DBN5	66887	Lonp2	Lon protease homolog 2, peroxisomal [Source:UniProtKB/Swiss-Prot;Acc:Q9DBN5]	exon start=circRNA start	exon end=circRNA end	86665691-86665841 exon:ENSMUSE00001290646|86667713-86667839 exon:ENSMUSE00000441917|86672936-86673069 exon:ENSMUSE00000441910	0	0	0	0	62.1006	49.885	0	0	0	0	5	4
CBT15_circR_6748	1.7404	0.014395	up	6	65862914	65901859	+	mm9_circ_006547:circbase	ENSMUSG00000029913	ENSMUST00000031976	ensembl_havana	Q9CXE0	70779	Prdm5	PR domain containing 5 [Source:MGI Symbol;Acc:MGI:1918029]	exon start=circRNA start	exon end=circRNA end	65862915-65862994 exon:ENSMUSE00000193763|65869181-65869265 exon:ENSMUSE00000193762|65870312-65870469 exon:ENSMUSE00000193764|65881049-65881142 exon:ENSMUSE00000193770|65883523-65883683 exon:ENSMUSE00000193753|65886085-65886178 exon:ENSMUSE00000193755|65901774-65901859 exon:ENSMUSE00000193767	0	0	0	25.0008	24.8402	37.4137	0	0	0	2	2	3
CBT15_circR_209	2.00188	0.0115011	up	1	165350883	165357546	-	-	ENSMUSG00000026571	ENSMUST00000027856	ensembl_havana	Q9DC22	74106	Dcaf6	DDB1- and CUL4-associated factor 6 [Source:UniProtKB/Swiss-Prot;Acc:Q9DC22]	exon start=circRNA start	exon end=circRNA end	165350884-165351280 exon:ENSMUSE00000160630|165351472-165351540 exon:ENSMUSE00000160633|165351961-165352076 exon:ENSMUSE00000160632|165357429-165357546 exon:ENSMUSE00000160637	0	0	0	25.0008	0	0	0	0	0	2	0	0
CBT15_circR_1443	2.00188	0.0115011	up	11	78319985	78321766	+	-	ENSMUSG00000002055	ENSMUST00000045026	ensembl_havana	Q7TME2	54141	Spag5	Sperm-associated antigen 5 [Source:UniProtKB/Swiss-Prot;Acc:Q7TME2]	exon start=circRNA start	exon end=circRNA end	78319986-78320072 exon:ENSMUSE00001230878|78320332-78320452 exon:ENSMUSE00000286228|78320561-78320672 exon:ENSMUSE00000286219|78321043-78321123 exon:ENSMUSE00000286208|78321262-78321417 exon:ENSMUSE00000286199|78321498-78321572 exon:ENSMUSE00000286192|78321686-78321766 exon:ENSMUSE00000286188	0	0	0	25.0008	0	0	0	0	0	2	0	0
CBT15_circR_3483	2.00188	0.0115011	up	17	78237741	78281366	+	-	ENSMUSG00000024074	ENSMUST00000112498	ensembl	Q9JLL0	50766	Crim1	cysteine rich transmembrane BMP regulator 1 (chordin like)	exon start=circRNA start	exon end=circRNA end	78237742-78237915 exon:ENSMUSE00000259898|78279973-78280215 exon:ENSMUSE00000259874|78281246-78281366 exon:ENSMUSE00000138029	0	0	0	25.0008	0	0	0	0	0	2	0	0
CBT15_circR_3542	2.00188	0.0115011	up	18	10574874	10586041	-	-	ENSMUSG00000024293	ENSMUST00000025142	ensembl_havana	Q69Z69	77805	Esco1	N-acetyltransferase ESCO1 [Source:UniProtKB/Swiss-Prot;Acc:Q69Z69]	exon start=circRNA start	exon end=circRNA end	10574875-10575018 exon:ENSMUSE00001249179|10577001-10577090 exon:ENSMUSE00001237382|10582055-10582186 exon:ENSMUSE00001275083|10584248-10584362 exon:ENSMUSE00001303779|10585978-10586041 exon:ENSMUSE00001263258	0	0	0	25.0008	0	0	0	0	0	2	0	0
CBT15_circR_4880	2.00188	0.0115011	up	3	103032588	103034457	+	-	ENSMUSG00000068823	ENSMUST00000029446	ensembl_havana	Q91W50	229663	Csde1	Cold shock domain-containing protein E1 [Source:UniProtKB/Swiss-Prot;Acc:Q91W50]	transcript start<=circRNA start	transcript end>=circRNA end	-	0	0	0	25.0008	0	0	0	0	0	2	0	0
CBT15_circR_4912	2.00188	0.0115011	up	3	109525868	109528384	+	-	ENSMUSG00000033721	ENSMUST00000046864	ensembl_havana	Q9R0C8	57257	Vav3	vav 3 oncogene [Source:MGI Symbol;Acc:MGI:1888518]	exon start=circRNA start	exon end=circRNA end	109525869-109525954 exon:ENSMUSE00001244158|109527414-109527546 exon:ENSMUSE00001270495|109528275-109528384 exon:ENSMUSE00001260244	0	0	0	25.0008	0	0	0	0	0	2	0	0
CBT15_circR_5159	2.00188	0.0115011	up	3	86532084	86542711	+	mm9_circ_009780:circbase	ENSMUSG00000028080	ENSMUST00000107635	ensembl_havana	Q8BSM6	80877	Lrba	LPS responsive beige-like anchor protein [Source:HGNC Symbol;Acc:HGNC:1742]	exon start=circRNA start	exon end=circRNA end	86532085-86532209 exon:ENSMUSE00000298165|86539903-86540049 exon:ENSMUSE00000415465|86542575-86542711 exon:ENSMUSE00000298137	0	0	0	25.0008	0	0	0	0	0	2	0	0
CBT15_circR_5183	2.00188	0.0115011	up	3	88965811	89007877	+	-	ENSMUSG00000028053	ENSMUST00000090933	ensembl	Q99MY8	192195	Ash1l	Histone-lysine N-methyltransferase ASH1L [Source:UniProtKB/Swiss-Prot;Acc:Q99MY8]	exon start=circRNA start	exon end=circRNA end	88965812-88966328 exon:ENSMUSE00000436728|88981233-88985790 exon:ENSMUSE00000510362|89001773-89001874 exon:ENSMUSE00000567020|89007142-89007877 exon:ENSMUSE00000567019	0	0	0	25.0008	0	0	0	0	0	2	0	0
CBT15_circR_5291	2.00188	0.0115011	up	4	108478872	108491464	+	-	ENSMUSG00000034610	ENSMUST00000043368	ensembl	B2RX14	230594	Zcchc11	zinc finger, CCHC domain containing 11 [Source:MGI Symbol;Acc:MGI:2445126]	exon start=circRNA start	exon end=circRNA end	108478873-108479741 exon:ENSMUSE00000601575|108486454-108486617 exon:ENSMUSE00000180495|108491348-108491464 exon:ENSMUSE00000270763	0	0	0	25.0008	0	0	0	0	0	2	0	0
CBT15_circR_5936	2.00188	0.0115011	up	5	121772666	121778105	+	mm9_circ_016398:circbase	ENSMUSG00000042605	ENSMUST00000051950	ensembl_havana	O70305	20239	Atxn2	ataxin 2 [Source:HGNC Symbol;Acc:HGNC:10555]	exon start=circRNA start	exon end=circRNA end	121772667-121772788 exon:ENSMUSE00000991781|121777370-121777461 exon:ENSMUSE00001091260|121777908-121778105 exon:ENSMUSE00000975319	0	0	0	25.0008	0	0	0	0	0	2	0	0
CBT15_circR_6333	2.00188	0.0115011	up	5	66362717	66365120	-	mm9_circ_002581:circbase	ENSMUSG00000029207	ENSMUST00000159512	havana	F6V9I9	11787	Apbb2	Amyloid-beta A4 protein-binding family B member 2 [Source:UniProtKB/Swiss-Prot;Acc:Q9DBR4]	exon start=circRNA start	exon end=circRNA end	66362718-66362845 exon:ENSMUSE00000599033|66364974-66365120 exon:ENSMUSE00001229051	0	0	0	25.0008	0	0	0	0	0	2	0	0
CBT15_circR_710	2.32509	0.0140811	up	10	40076563	40080807	-	-	ENSMUSG00000019838	ENSMUST00000092566	ensembl_havana	Q3U9N9	72472	Slc16a10	solute carrier family 16 (monocarboxylic acid transporters), member 10 [Source:MGI Symbol;Acc:MGI:1919722]	exon start=circRNA start	exon end=circRNA end	40076564-40077017 exon:ENSMUSE00000098423|40080663-40080807 exon:ENSMUSE00000336552	0	0	0	37.5011	99.3609	0	0	0	0	3	8	0
CBT15_circR_1547	2.32509	0.0140811	up	11	98263469	98267858	+	mm9_circ_006636:circbase	ENSMUSG00000003119	ENSMUST00000147441	havana	Q14AX6	69131	Cdk12	Cyclin-dependent kinase 12 [Source:UniProtKB/Swiss-Prot;Acc:Q14AX6]	exon start=circRNA start	exon end=circRNA end	98263470-98263570 exon:ENSMUSE00000747426|98264194-98264307 exon:ENSMUSE00000824235|98267752-98267858 exon:ENSMUSE00000783726	0	0	0	37.5011	99.3609	0	0	0	0	3	8	0
CBT15_circR_908	-2.62994168914812	0.0153677	down	10	84947411	84948020	+	mm9_circ_004072:circbase	ENSMUSG00000035620	ENSMUST00000038523	ensembl_havana	Q80XE1	237422	Ric8b	Synembryn-B [Source:UniProtKB/Swiss-Prot;Acc:Q80XE1]	exon start=circRNA start	exon end=circRNA end	84947412-84948020 exon:ENSMUSE00000252346	91.8271	82.1472	0	0	24.8402	0	7	6	0	0	2	0
CBT15_circR_1023	-2.54772026794863	0.0171895	down	11	106685019	106688897	+	-	ENSMUSG00000020717	ENSMUST00000068021	havana	Q08481	18613	Pecam1	platelet/endothelial cell adhesion molecule 1 [Source:MGI Symbol;Acc:MGI:97537]	transcript start<=circRNA start	transcript end>=circRNA end	-	65.5908	54.7648	27.4573	0	0	49.885	5	4	2	0	0	4
CBT15_circR_3276	2.35718	0.0151425	up	17	30135322	30192730	+	-	ENSMUSG00000044477	ENSMUST00000057897	ensembl_havana	Q497H0	21769	Zfand3	zinc finger, AN1-type domain 3	exon start=circRNA start	exon end=circRNA end	30135323-30135505 exon:ENSMUSE00000657864|30192563-30192730 exon:ENSMUSE00000441000	0	0	0	25.0008	124.201	0	0	0	0	2	10	0
CBT15_circR_5056	2.12139	0.0155504	up	3	30237977	30238321	-	-	ENSMUSG00000027684	ENSMUST00000172697	havana	G3UZ13	14013	Mecom	MDS1 and EVI1 complex locus [Source:MGI Symbol;Acc:MGI:95457]	exon start=circRNA start	exon end=circRNA end	30237978-30238321 exon:ENSMUSE00001266285	0	0	0	25.0008	86.9408	0	0	0	0	2	7	0
CBT15_circR_30	2.08298	0.0157208	up	1	11169852	11170791	+	-	ENSMUSG00000048960	ENSMUST00000027056	ensembl_havana	Q3LAC4	109294	Prex2	Phosphatidylinositol 3,4,5-trisphosphate-dependent Rac exchanger 2 protein [Source:UniProtKB/Swiss-Prot;Acc:Q3LAC4]	exon start=circRNA start	exon end=circRNA end	11169853-11170075 exon:ENSMUSE00000604632|11170584-11170791 exon:ENSMUSE00000604631	0	0	0	25.0008	74.5207	0	0	0	0	2	6	0
CBT15_circR_6488	-2.39280512210745	0.0163806	down	6	119049038	119057515	-	-	ENSMUSG00000051331	ENSMUST00000075591	havana	Q01815	12288	Cacna1c	Voltage-dependent L-type calcium channel subunit alpha-1C [Source:UniProtKB/Swiss-Prot;Acc:Q01815]	exon start!=circRNA start	exon end=circRNA end	-	65.5908	68.456	0	0	0	0	5	5	0	0	0	0
CBT15_circR_6844	1.10866	0.00887614	up	6	99003199	99010057	-	-	ENSMUSG00000030067	ENSMUST00000113328	havana	P58462	108655	Foxp1	Mus musculus forkhead box P1 (Foxp1), transcript variant 4, mRNA. [Source:RefSeq mRNA;Acc:NM_001347345]	exon start=circRNA start	exon end=circRNA end	99003200-99003404 exon:ENSMUSE00001371478|99009904-99010057 exon:ENSMUSE00000695184	314.836	109.53	274.573	362.511	757.627	511.321	24	8	20	29	61	41
CBT15_circR_440	2.06274	0.0159541	up	1	63085667	63105759	-	-	ENSMUSG00000040865	ENSMUST00000137511	havana	B1AT32	227195	Ino80d	INO80 complex subunit D [Source:HGNC Symbol;Acc:HGNC:25997]	exon start=circRNA start	exon end=circRNA end	63085668-63086398 exon:ENSMUSE00001252109|63093285-63093531 exon:ENSMUSE00001260673|63093640-63093730 exon:ENSMUSE00000629840|63105656-63105759 exon:ENSMUSE00000746032	0	0	0	37.5011	62.1006	0	0	0	0	3	5	0
CBT15_circR_7343	2.21352	0.0160469	up	8	106108124	106109129	+	-	ENSMUSG00000031902	ENSMUST00000109308	ensembl_havana	Q3UZ64	18021	Nfatc3	nuclear factor of activated T cells, cytoplasmic, calcineurin dependent 3 [Source:MGI Symbol;Acc:MGI:103296]	exon start=circRNA start	exon end=circRNA end	106108125-106109129 exon:ENSMUSE00001030831	0	0	0	0	124.201	37.4137	0	0	0	0	10	3
CBT15_circR_4447	2.13622	0.0158931	up	2	163629126	163639327	-	-	ENSMUSG00000017707	ENSMUST00000017851	ensembl_havana	Q9QZI9	26943	Serinc3	Serine incorporator 3 [Source:UniProtKB/Swiss-Prot;Acc:Q9QZI9]	exon start=circRNA start	exon end=circRNA end	163629127-163629217 exon:ENSMUSE00000171564|163630926-163631095 exon:ENSMUSE00000171566|163632106-163632243 exon:ENSMUSE00000171571|163634435-163634514 exon:ENSMUSE00000171568|163636811-163637004 exon:ENSMUSE00000171572|163639166-163639327 exon:ENSMUSE00001252910	0	0	0	50.0015	62.1006	0	0	0	0	4	5	0
CBT15_circR_3463	1.93862	0.0159543	up	17	73906009	73907745	-	-	ENSMUSG00000024066	ENSMUST00000024866	ensembl	Q00519	22436	Xdh	xanthine dehydrogenase	exon start=circRNA start	exon end=circRNA end	73906010-73906096 exon:ENSMUSE00000230247|73906204-73906291 exon:ENSMUSE00000230268|73906695-73906828 exon:ENSMUSE00000230286|73907621-73907745 exon:ENSMUSE00000230305	0	0	0	37.5011	24.8402	49.885	0	0	0	3	2	4
CBT15_circR_72	-2.49099008596737	0.0168449	down	1	128193459	128211359	+	-	ENSMUSG00000056211	ENSMUST00000036288	ensembl_havana	E9Q9Q2	226412	R3hdm1	R3H domain containing 1 [Source:MGI Symbol;Acc:MGI:2448514]	exon start=circRNA start	exon end=circRNA end	128193460-128193756 exon:ENSMUSE00000540051|128196974-128197097 exon:ENSMUSE00000540050|128211205-128211359 exon:ENSMUSE00000540049	104.945	54.7648	0	0	0	0	8	4	0	0	0	0
CBT15_circR_7418	-2.35038572906852	0.0170393	down	8	117555974	117558116	+	-	ENSMUSG00000034330	ENSMUST00000081232	ensembl_havana	Q8CIH5	234779	Plcg2	1-phosphatidylinositol 4,5-bisphosphate phosphodiesterase gamma-2 [Source:UniProtKB/Swiss-Prot;Acc:Q8CIH5]	exon start=circRNA start	exon end=circRNA end	117555975-117556118 exon:ENSMUSE00000510698|117557303-117557396 exon:ENSMUSE00000509824|117558069-117558116 exon:ENSMUSE00000508925	78.709	54.7648	0	0	0	0	6	4	0	0	0	0
CBT15_circR_6375	2.02823	0.0159859	up	5	73510885	73534697	+	-	ENSMUSG00000051674	ENSMUST00000063882	ensembl_havana	Q8CCA0	100737	Dcun1d4	DCN1-like protein 4 [Source:UniProtKB/Swiss-Prot;Acc:Q8CCA0]	exon start=circRNA start	exon end=circRNA end	73510886-73510956 exon:ENSMUSE00001308404|73511127-73511166 exon:ENSMUSE00001283052|73520116-73520230 exon:ENSMUSE00001228245|73522653-73522744 exon:ENSMUSE00001260001|73531504-73531574 exon:ENSMUSE00001218861|73534606-73534697 exon:ENSMUSE00001283177	0	0	0	37.5011	24.8402	62.3562	0	0	0	3	2	5
CBT15_circR_982	2.62262	0.0189232	up	11	103046378	103055289	+	mm9_circ_017115:circbase	ENSMUSG00000020936	ENSMUST00000021314	ensembl_havana	Q3UJC3	18107	Nmt1	Glycylpeptide N-tetradecanoyltransferase 1 [Source:UniProtKB/Swiss-Prot;Acc:O70310]	exon start=circRNA start	exon end=circRNA end	103046379-103046523 exon:ENSMUSE00001262161|103052206-103052324 exon:ENSMUSE00001235691|103055198-103055289 exon:ENSMUSE00001300004	0	0	68.6432	75.0023	124.201	87.2987	0	0	5	6	10	7
CBT15_circR_8323	3.04742	0.0196957	up	X	142752039	142834393	+	mm9_circ_004752:circbase	ENSMUSG00000047045	ENSMUST00000112889	havana	Q6PHN7	209497	Tmem164	transmembrane protein 164 [Source:MGI Symbol;Acc:MGI:2148020]	exon start=circRNA start	exon end=circRNA end	142752040-142752089 exon:ENSMUSE00001258611|142770967-142771033 exon:ENSMUSE00001274686|142805990-142806068 exon:ENSMUSE00001228961|142832501-142832601 exon:ENSMUSE00001229168|142834185-142834393 exon:ENSMUSE00001300899	131.182	0	0	75.0023	198.722	199.54	10	0	0	6	16	16
CBT15_circR_4346	2.60226	0.0194992	up	2	145858440	145861174	+	-	ENSMUSG00000001768	ENSMUST00000094480	ensembl	Q9D684	74030	Rin2	Ras and Rab interactor 2 [Source:MGI Symbol;Acc:MGI:1921280]	exon start=circRNA start	exon end=circRNA end	145858441-145858532 exon:ENSMUSE00001218368|145860014-145861174 exon:ENSMUSE00001310964	0	54.7648	0	62.5019	149.041	62.3562	0	4	0	5	12	5
CBT15_circR_5689	2.04742	0.0179814	up	4	59514273	59524476	-	-	ENSMUSG00000028382	ENSMUST00000030076	ensembl_havana	Q8BHD7	230257	Ptbp3	Polypyrimidine tract-binding protein 3 [Source:UniProtKB/Swiss-Prot;Acc:Q8BHD7]	exon start=circRNA start	exon end=circRNA end	59514274-59514420 exon:ENSMUSE00001237876|59517586-59517755 exon:ENSMUSE00000882482|59524395-59524476 exon:ENSMUSE00001284955	0	0	0	0	99.3609	37.4137	0	0	0	0	8	3
CBT15_circR_6542	-2.50658732173303	0.01853	down	6	134115219	134137417	+	-	ENSMUSG00000030199	ENSMUST00000081028	ensembl_havana	P97360	14011	Etv6	Transcription factor ETV6 [Source:UniProtKB/Swiss-Prot;Acc:P97360]	exon start!=circRNA start	exon end=circRNA end	-	0	54.7648	123.558	0	0	0	0	4	9	0	0	0
CBT15_circR_1727	2.11184	0.0203543	up	12	3632809	3648389	+	mm9_circ_006216:circbase	ENSMUSG00000071454	ENSMUST00000077930	ensembl_havana	Q8C8Z9	13528	Dtnb	Dystrobrevin beta [Source:UniProtKB/Swiss-Prot;Acc:O70585]	exon start=circRNA start	exon end=circRNA end	3632810-3632964 exon:ENSMUSE00001272480|3643917-3644022 exon:ENSMUSE00001280989|3648223-3648389 exon:ENSMUSE00001297526	26.2363	0	0	25.0008	49.6805	62.3562	2	0	0	2	4	5
CBT15_circR_8254	-2.05235295702085	0.0197308	down	MT	13457	14012	-	-	ENSMUSG00000064367	-	insdc	Q9MD82	17721	mt-Nd5	mitochondrially encoded NADH dehydrogenase 5 [Source:MGI Symbol;Acc:MGI:102496]	overlapgene	-	-	52.4726	41.0736	0	0	0	0	4	3	0	0	0	0
CBT15_circR_3933	-2.15608859415326	0.0197509	down	19	3604001	3610238	-	-	ENSMUSG00000024913	ENSMUST00000025856	ensembl_havana	Q91VN0	16973	Lrp5	Low-density lipoprotein receptor-related protein 5 [Source:UniProtKB/Swiss-Prot;Acc:Q91VN0]	exon start=circRNA start	exon end=circRNA end	3604002-3604192 exon:ENSMUSE00001288434|3605286-3605494 exon:ENSMUSE00001293687|3610039-3610238 exon:ENSMUSE00001278676	39.3545	0	68.6432	0	24.8402	0	3	0	5	0	2	0
CBT15_circR_3616	-2.30893249145466	0.0196608	down	18	36646690	36648740	+	-	ENSMUSG00000024483	ENSMUST00000006205	havana	Q8BXZ6	108857	Ankhd1	ankyrin repeat and KH domain containing 1 [Source:MGI Symbol;Acc:MGI:1921733]	exon start=circRNA start	exon end=circRNA end	36646691-36646840 exon:ENSMUSE00001084214|36647131-36648740 exon:ENSMUSE00001077570	91.8271	0	41.1859	0	24.8402	0	7	0	3	0	2	0
CBT15_circR_3854	-2.63984268018164	0.0191927	down	19	11923800	11925226	+	-	ENSMUSG00000046139	ENSMUST00000061618	ensembl	Q3TC46	225929	Patl1	protein associated with topoisomerase II homolog 1 (yeast)	exon start=circRNA start	exon end=circRNA end	11923801-11924018 exon:ENSMUSE00000398510|11925137-11925226 exon:ENSMUSE00000364162	118.063	0	68.6432	0	37.2604	24.9425	9	0	5	0	3	2
CBT15_circR_3488	-1.94675769030599	0.0202487	down	17	78279972	78281366	+	-	ENSMUSG00000024074	ENSMUST00000112498	ensembl	Q9JLL0	50766	Crim1	cysteine rich transmembrane BMP regulator 1 (chordin like)	exon start=circRNA start	exon end=circRNA end	78279973-78280215 exon:ENSMUSE00000259874|78281246-78281366 exon:ENSMUSE00000138029	39.3545	0	41.1859	0	0	0	3	0	3	0	0	0
CBT15_circR_6743	-2.06590791399762	0.0201565	down	6	61310813	61313835	+	mm9_circ_001686:circbase	ENSMUSG00000039578	ENSMUST00000126214	havana	Q8C0C4	232035	Ccser1	Serine-rich coiled-coil domain-containing protein 1 [Source:UniProtKB/Swiss-Prot;Acc:Q8C0C4]	exon start=circRNA start	exon end=circRNA end	61310814-61312172 exon:ENSMUSE00000811395|61313654-61313835 exon:ENSMUSE00000825006	39.3545	0	54.9146	0	24.8402	0	3	0	4	0	2	0
CBT15_circR_8043	2.4573	0.0211529	up	9	60375952	60394546	-	-	ENSMUSG00000032289	ENSMUST00000098660	ensembl_havana	Q3UTY6	207596	Thsd4	Thrombospondin type-1 domain-containing protein 4 [Source:UniProtKB/Swiss-Prot;Acc:Q3UTY6]	exon start=circRNA start	exon end=circRNA end	60375953-60376055 exon:ENSMUSE00000636309|60394099-60394546 exon:ENSMUSE00000636310	0	54.7648	0	62.5019	99.3609	74.8275	0	4	0	5	8	6
CBT15_circR_7435	-2.60453114601488	0.0196356	down	8	121974426	121978754	+	-	ENSMUSG00000025316	ENSMUST00000026354	havana	Q8VBU8	53325	Banp	Protein BANP [Source:UniProtKB/Swiss-Prot;Acc:Q8VBU8]	exon start=circRNA start	exon end=circRNA end	121974427-121974565 exon:ENSMUSE00001219510|121975900-121975991 exon:ENSMUSE00000605766|121978555-121978754 exon:ENSMUSE00000605765	0	68.456	123.558	0	37.2604	0	0	5	9	0	3	0
CBT15_circR_7826	1.93786	0.0195736	up	9	116129815	116131713	-	mm9_circ_007525:circbase	ENSMUSG00000032440	ENSMUST00000035014	ensembl_havana	Q8BQS9	21813	Tgfbr2	transforming growth factor, beta receptor II [Source:MGI Symbol;Acc:MGI:98729]	exon start=circRNA start	exon end=circRNA end	116129816-116130006 exon:ENSMUSE00000219766|116131545-116131713 exon:ENSMUSE00000327655	0	0	0	0	49.6805	74.8275	0	0	0	0	4	6
CBT15_circR_4220	-2.29919097776383	0.020392	down	2	119916430	119924086	+	-	ENSMUSG00000033943	ENSMUST00000046717	havana	A2AWL7	29808	Mga	MAX-associated protein [Source:UniProtKB/Swiss-Prot;Acc:A2AWL7]	exon start=circRNA start	exon end=circRNA end	119916431-119917373 exon:ENSMUSE00001266701|119919626-119919704 exon:ENSMUSE00001292407|119919812-119919907 exon:ENSMUSE00001223116|119921366-119921497 exon:ENSMUSE00000598116|119921738-119921842 exon:ENSMUSE00000598115|119923428-119924086 exon:ENSMUSE00001292594	0	41.0736	96.1005	0	0	0	0	3	7	0	0	0
CBT15_circR_8337	1.83529	0.0197422	up	X	152046659	152047968	+	-	ENSMUSG00000041133	ENSMUST00000045312	ensembl_havana	Q9CU62	24061	Smc1a	structural maintenance of chromosomes 1A [Source:MGI Symbol;Acc:MGI:1344345]	exon start=circRNA start	exon end=circRNA end	152046660-152046805 exon:ENSMUSE00000245238|152046895-152047048 exon:ENSMUSE00000245228|152047858-152047968 exon:ENSMUSE00000245223	0	0	0	50.0015	24.8402	37.4137	0	0	0	4	2	3
CBT15_circR_1379	1.7359	0.0204512	up	11	70874745	70887171	+	mm9_circ_001327:circbase	ENSMUSG00000020817	ENSMUST00000076270	ensembl_havana	O35551	54189	Rabep1	rabaptin, RAB GTPase binding effector protein 1 [Source:MGI Symbol;Acc:MGI:1860236]	exon start=circRNA start	exon end=circRNA end	70874746-70874874 exon:ENSMUSE00001256174|70884765-70884968 exon:ENSMUSE00001222682|70887011-70887171 exon:ENSMUSE00001206892	0	0	0	25.0008	49.6805	0	0	0	0	2	4	0
CBT15_circR_1986	1.7359	0.0204512	up	13	103884142	103897928	-	-	ENSMUSG00000021709	ENSMUST00000022222	ensembl	B7ZNX6	59079	Erbin	Erbin [Source:UniProtKB/Swiss-Prot;Acc:Q80TH2]	exon start=circRNA start	exon end!=circRNA end	-	0	0	0	25.0008	49.6805	0	0	0	0	2	4	0
CBT15_circR_2423	1.7359	0.0204512	up	14	45616529	45629753	-	-	ENSMUSG00000037697	ENSMUST00000051310	ensembl_havana	Q80YA3	114874	Ddhd1	phospholipase DDHD1 isoform 4 [Source:RefSeq peptide;Acc:NP_001271328]	exon start=circRNA start	exon end=circRNA end	45616530-45616636 exon:ENSMUSE00001218362|45619269-45619416 exon:ENSMUSE00001221038|45620712-45620840 exon:ENSMUSE00001282072|45629580-45629753 exon:ENSMUSE00001312422	0	0	0	25.0008	49.6805	0	0	0	0	2	4	0
CBT15_circR_5986	1.7359	0.0204512	up	5	130187400	130191043	+	mm9_circ_012854:circbase	ENSMUSG00000025340	ENSMUST00000119797	ensembl_havana	Q9JM13	56715	Rabgef1	Rab5 GDP/GTP exchange factor [Source:UniProtKB/Swiss-Prot;Acc:Q9JM13]	exon start=circRNA start	exon end=circRNA end	130187401-130187586 exon:ENSMUSE00000711184|130190877-130191043 exon:ENSMUSE00000149942	0	0	0	25.0008	49.6805	0	0	0	0	2	4	0
CBT15_circR_3156	-2.39536550170479	0.0224066	down	16	94383911	94403368	+	mm9_circ_010404:circbase	ENSMUSG00000040785	ENSMUST00000117648	ensembl_havana	G5E8T2	22129	Ttc3	tetratricopeptide repeat domain 3 [Source:MGI Symbol;Acc:MGI:1276539]	exon start=circRNA start	exon end=circRNA end	94383912-94384066 exon:ENSMUSE00001213866|94384346-94384388 exon:ENSMUSE00000263893|94384784-94384934 exon:ENSMUSE00001251162|94385336-94385423 exon:ENSMUSE00001216286|94387337-94387390 exon:ENSMUSE00001261370|94388265-94388385 exon:ENSMUSE00001217077|94390202-94390287 exon:ENSMUSE00001216756|94392015-94392109 exon:ENSMUSE00001258431|94393112-94393174 exon:ENSMUSE00001212071|94403314-94403368 exo…	183.654	95.8384	109.829	0	99.3609	37.4137	14	7	8	0	8	3
CBT15_circR_1566	1.88865	0.0205504	up	12	100446859	100495440	-	-	ENSMUSG00000033530	ENSMUST00000062957	ensembl_havana	E9Q6P5	104718	Ttc7b	tetratricopeptide repeat domain 7B	exon start=circRNA start	exon end=circRNA end	100446860-100446981 exon:ENSMUSE00000285082|100466180-100466310 exon:ENSMUSE00000376228|100495272-100495440 exon:ENSMUSE00000334910	0	0	0	0	86.9408	37.4137	0	0	0	0	7	3
CBT15_circR_6653	-1.92799040602326	0.0223068	down	6	35064888	35080226	-	-	ENSMUSG00000038784	ENSMUST00000044163	ensembl_havana	Q8BT14	53621	Cnot4	CCR4-NOT transcription complex subunit 4 [Source:UniProtKB/Swiss-Prot;Acc:Q8BT14]	exon start=circRNA start	exon end=circRNA end	35064889-35065022 exon:ENSMUSE00000285458|35068588-35068713 exon:ENSMUSE00000285465|35069370-35069471 exon:ENSMUSE00000285470|35070217-35070303 exon:ENSMUSE00000285478|35077981-35078178 exon:ENSMUSE00000285485|35079961-35080226 exon:ENSMUSE00000285489	39.3545	41.0736	0	0	24.8402	0	3	3	0	0	2	0
CBT15_circR_3981	-2.45534080322649	0.0216427	down	19	42562551	42564341	+	mm9_circ_011137:circbase	ENSMUSG00000025184	ENSMUST00000026188	ensembl_havana	Q8BJM3	52013	R3hcc1l	Coiled-coil domain-containing protein R3HCC1L [Source:UniProtKB/Swiss-Prot;Acc:Q8BJM3]	exon start=circRNA start	exon end=circRNA end	42562552-42564341 exon:ENSMUSE00000367689	0	123.221	41.1859	0	0	0	0	9	3	0	0	0
CBT15_circR_2263	1.81891	0.0216924	up	14	100022621	100023168	-	-	ENSMUSG00000072294	ENSMUST00000097079	ensembl	O35738	16597	Klf12	Kruppel-like factor 12	exon start=circRNA start	exon end=circRNA end	100022622-100023168 exon:ENSMUSE00000628573	0	0	0	37.5011	49.6805	0	0	0	0	3	4	0
CBT15_circR_4179	1.81726	0.021785	up	2	104778136	104780260	-	-	ENSMUSG00000074994	ENSMUST00000117237	ensembl_havana	A2BIE1	99003	Qser1	glutamine and serine rich 1 [Source:HGNC Symbol;Acc:HGNC:26154]	exon start=circRNA start	exon end=circRNA end	104778137-104778253 exon:ENSMUSE00000717872|104779935-104780260 exon:ENSMUSE00000720790	0	0	0	0	49.6805	62.3562	0	0	0	0	4	5
CBT15_circR_7094	1.81726	0.021785	up	7	27459255	27459652	+	-	ENSMUSG00000040466	ENSMUST00000037399	ensembl_havana	Q923D2	233016	Blvrb	Flavin reductase (NADPH) [Source:UniProtKB/Swiss-Prot;Acc:Q923D2]	exon start=circRNA start	exon end=circRNA end	27459256-27459420 exon:ENSMUSE00001278150|27459563-27459652 exon:ENSMUSE00001271673	0	0	0	0	49.6805	62.3562	0	0	0	0	4	5
CBT15_circR_233	1.99906	0.0266137	up	1	172173942	172187460	+	-	ENSMUSG00000026554	ENSMUST00000074144	havana	Q8N7N5	98193	Dcaf8	DDB1- and CUL4-associated factor 8 [Source:UniProtKB/Swiss-Prot;Acc:Q8N7N5]	exon start=circRNA start	exon end=circRNA end	172173943-172174083 exon:ENSMUSE00000296421|172175483-172175577 exon:ENSMUSE00000296414|172179907-172180017 exon:ENSMUSE00000296344|172186296-172186368 exon:ENSMUSE00000296335|172186855-172186912 exon:ENSMUSE00000296325|172187353-172187460 exon:ENSMUSE00001088686	26.2363	0	41.1859	37.5011	124.201	87.2987	2	0	3	3	10	7
CBT15_circR_401	-2.70448473819491	0.0258135	down	1	54828611	54877821	-	-	ENSMUSG00000052331	ENSMUST00000044359	ensembl	B2RXR6	329154	Ankrd44	Serine/threonine-protein phosphatase 6 regulatory ankyrin repeat subunit B [Source:UniProtKB/Swiss-Prot;Acc:B2RXR6]	exon start=circRNA start	exon end!=circRNA end	-	91.8271	27.3824	96.1005	0	74.5207	0	7	2	7	0	6	0
CBT15_circR_5187	2.74472	0.0270038	up	3	89001772	89007877	+	mm9_circ_009027:circbase	ENSMUSG00000028053	ENSMUST00000090933	ensembl	Q99MY8	192195	Ash1l	Histone-lysine N-methyltransferase ASH1L [Source:UniProtKB/Swiss-Prot;Acc:Q99MY8]	exon start=circRNA start	exon end=circRNA end	89001773-89001874 exon:ENSMUSE00000567020|89007142-89007877 exon:ENSMUSE00000567019	0	68.456	0	25.0008	149.041	174.597	0	5	0	2	12	14
CBT15_circR_4181	-1.91058671184373	0.0261802	down	2	106699287	106744881	+	-	ENSMUSG00000016386	ENSMUST00000016530	ensembl_havana	Q9CZJ0	77015	Mpped2	Metallophosphoesterase MPPED2 [Source:UniProtKB/Swiss-Prot;Acc:Q9CZJ0]	exon start=circRNA start	exon end=circRNA end	106699288-106699535 exon:ENSMUSE00001254426|106744700-106744881 exon:ENSMUSE00001247261	65.5908	0	27.4573	0	0	0	5	0	2	0	0	0
CBT15_circR_7935	-1.92170367728532	0.0262113	down	9	3634438	3635157	+	mm9_circ_009519:circbase	ENSMUSG00000041624	ENSMUST00000115733	ensembl_havana	F8VQK3	234889	Gucy1a2	guanylate cyclase 1 soluble subunit alpha 2 [Source:HGNC Symbol;Acc:HGNC:4684]	exon start=circRNA start	exon end=circRNA end	3634439-3635157 exon:ENSMUSE00000585153	39.3545	41.0736	0	0	37.2604	0	3	3	0	0	3	0
CBT15_circR_6394	-1.93176453834955	0.0263994	down	5	81511983	81512784	+	-	ENSMUSG00000037605	ENSMUST00000072521	ensembl	Q80TS3	319387	Adgrl3	Adhesion G protein-coupled receptor L3 [Source:UniProtKB/Swiss-Prot;Acc:Q80TS3]	exon start=circRNA start	exon end=circRNA end	81511984-81512784 exon:ENSMUSE00001227742	39.3545	0	41.1859	0	0	24.9425	3	0	3	0	0	2
CBT15_circR_4544	-1.82042099019425	0.0266224	down	2	18146776	18186396	+	-	ENSMUSG00000026743	ENSMUST00000028076	ensembl	O54826	17354	Mllt10	myeloid/lymphoid or mixed-lineage leukemia; translocated to, 10 [Source:MGI Symbol;Acc:MGI:1329038]	exon start=circRNA start	exon end=circRNA end	18146777-18146872 exon:ENSMUSE00001309694|18159456-18159711 exon:ENSMUSE00001256738|18162317-18162886 exon:ENSMUSE00000162332|18170254-18170298 exon:ENSMUSE00001286440|18171043-18171075 exon:ENSMUSE00001241629|18186218-18186396 exon:ENSMUSE00001217327	26.2363	0	54.9146	0	0	0	2	0	4	0	0	0
CBT15_circR_3053	-2.02665969016838	0.0263595	down	16	43569680	43577748	+	mm9_circ_017140:circbase	ENSMUSG00000022708	ENSMUST00000079441	ensembl	Q8K0L9	56490	Zbtb20	zinc finger and BTB domain containing 20 [Source:MGI Symbol;Acc:MGI:1929213]	exon start=circRNA start	exon end=circRNA end	43569681-43569781 exon:ENSMUSE00000361883|43571734-43571791 exon:ENSMUSE00001278851|43577030-43577193 exon:ENSMUSE00001377982|43577561-43577748 exon:ENSMUSE00001247051	0	41.0736	54.9146	0	0	24.9425	0	3	4	0	0	2
CBT15_circR_6150	-1.81236497270088	0.0269077	down	5	20919524	20920162	-	-	ENSMUSG00000039968	ENSMUST00000036489	ensembl	D3Z0K6	242860	Rsbn1l	round spermatid basic protein 1-like	exon start=circRNA start	exon end=circRNA end	20919525-20920162 exon:ENSMUSE00000483327	52.4726	27.3824	0	0	0	0	4	2	0	0	0	0
CBT15_circR_3196	-1.90130793647567	0.0269715	down	17	17570873	17575387	-	-	ENSMUSG00000023845	ENSMUST00000041047	ensembl	Q8C129	240028	Lnpep	leucyl/cystinyl aminopeptidase	exon start=circRNA start	exon end=circRNA end	17570874-17571028 exon:ENSMUSE00000555208|17571626-17571746 exon:ENSMUSE00000555212|17573947-17574078 exon:ENSMUSE00000555215|17575249-17575387 exon:ENSMUSE00000555216	65.5908	27.3824	0	0	0	0	5	2	0	0	0	0
CBT15_circR_4335	-1.90130793647567	0.0269715	down	2	14115816	14117535	+	-	ENSMUSG00000026718	ENSMUST00000028050	havana	P70297	20844	Stam	signal transducing adaptor molecule (SH3 domain and ITAM motif) 1 [Source:MGI Symbol;Acc:MGI:1329014]	exon start=circRNA start	exon end=circRNA end	14115817-14115892 exon:ENSMUSE00001213984|14115978-14116073 exon:ENSMUSE00001266996|14117389-14117535 exon:ENSMUSE00001262761	65.5908	27.3824	0	0	0	0	5	2	0	0	0	0
CBT15_circR_5253	-1.90130793647567	0.0269715	down	4	100407812	100412140	+	-	ENSMUSG00000035305	ENSMUST00000039630	ensembl_havana	Q9Z139	26563	Ror1	Inactive tyrosine-protein kinase transmembrane receptor ROR1 [Source:UniProtKB/Swiss-Prot;Acc:Q9Z139]	exon start=circRNA start	exon end=circRNA end	100407813-100407940 exon:ENSMUSE00000377020|100409714-100410031 exon:ENSMUSE00000280683|100411895-100412140 exon:ENSMUSE00000280672	65.5908	27.3824	0	0	0	0	5	2	0	0	0	0
CBT15_circR_5644	-1.90130793647567	0.0269715	down	4	47383748	47396585	+	-	ENSMUSG00000007613	ENSMUST00000007757	ensembl_havana	Q64729	21812	Tgfbr1	transforming growth factor, beta receptor I [Source:MGI Symbol;Acc:MGI:98728]	exon start=circRNA start	exon end=circRNA end	47383749-47383994 exon:ENSMUSE00001285304|47393247-47393489 exon:ENSMUSE00000230734|47396355-47396585 exon:ENSMUSE00000527316	65.5908	27.3824	0	0	0	0	5	2	0	0	0	0
CBT15_circR_6829	-1.90130793647567	0.0269715	down	6	92887340	92912912	-	-	ENSMUSG00000030022	ENSMUST00000113438	havana	E9PYV8	101401	Adamts9	a disintegrin-like and metallopeptidase (reprolysin type) with thrombospondin type 1 motif, 9 [Source:MGI Symbol;Acc:MGI:1916320]	exon start=circRNA start	exon end=circRNA end	92887341-92887436 exon:ENSMUSE00000613734|92887686-92887803 exon:ENSMUSE00000613735|92889882-92890018 exon:ENSMUSE00000613736|92890109-92890290 exon:ENSMUSE00000613737|92894241-92894386 exon:ENSMUSE00001287165|92901375-92901479 exon:ENSMUSE00000613739|92903688-92903829 exon:ENSMUSE00000613740|92905154-92905300 exon:ENSMUSE00000613741|92908477-92908582 exon:ENSMUSE00000613742|92908698-92908738 exo…	65.5908	27.3824	0	0	0	0	5	2	0	0	0	0
CBT15_circR_3413	1.6773	0.025461	up	17	63921612	63924178	+	-	ENSMUSG00000000127	ENSMUST00000000129	ensembl	Q3TME9	14158	Fer	fer (fms/fps related) protein kinase	exon start=circRNA start	exon end=circRNA end	63921613-63921796 exon:ENSMUSE00000138194|63923362-63923499 exon:ENSMUSE00000138218|63924059-63924178 exon:ENSMUSE00000138210	0	0	0	0	62.1006	37.4137	0	0	0	0	5	3
CBT15_circR_1087	-1.81151700994894	0.0272044	down	11	119151027	119154075	-	-	ENSMUSG00000039976	ENSMUST00000036113	ensembl_havana	A2ABG4	207592	Tbc1d16	Mus musculus TBC1 domain family, member 16 (Tbc1d16), transcript variant 2, mRNA. [Source:RefSeq mRNA;Acc:NM_001347625]	exon start=circRNA start	exon end=circRNA end	119151028-119151207 exon:ENSMUSE00000319026|119153889-119154075 exon:ENSMUSE00000319036	26.2363	54.7648	0	0	0	0	2	4	0	0	0	0
CBT15_circR_990	-2.00863956095345	0.0269441	down	11	104350486	104378826	-	mm9_circ_006509:circbase	ENSMUSG00000018412	ENSMUST00000018556	havana	Q80TG1	76719	Kansl1	KAT8 regulatory NSL complex subunit 1 [Source:MGI Symbol;Acc:MGI:1923969]	exon start=circRNA start	exon end=circRNA end	104350487-104350652 exon:ENSMUSE00000222952|104356684-104356876 exon:ENSMUSE00000477977|104357481-104357596 exon:ENSMUSE00000222964|104368680-104368778 exon:ENSMUSE00000222969|104378685-104378826 exon:ENSMUSE00000222899	26.2363	0	82.3719	0	0	0	2	0	6	0	0	0
CBT15_circR_4747	-2.00863956095345	0.0269441	down	2	60232199	60234997	+	-	ENSMUSG00000026977	ENSMUST00000067542	ensembl	Q9WV66	57438	March7	E3 ubiquitin-protein ligase MARCH7 [Source:UniProtKB/Swiss-Prot;Acc:Q9WV66]	exon start=circRNA start	exon end=circRNA end	60232200-60232367 exon:ENSMUSE00001254111|60233899-60234997 exon:ENSMUSE00000566892	26.2363	0	82.3719	0	0	0	2	0	6	0	0	0
CBT15_circR_1686	2.36517	0.0283352	up	12	24854878	24882794	+	-	ENSMUSG00000020646	ENSMUST00000110942	ensembl_havana	Q8BN01	67216	Mboat2	membrane bound O-acyltransferase domain containing 2	exon start!=circRNA start	exon end=circRNA end	-	52.4726	0	0	87.5027	74.5207	62.3562	4	0	0	7	6	5
CBT15_circR_2874	-1.98194423456951	0.0272796	down	15	98084969	98087133	-	mm9_circ_007788:circbase	ENSMUSG00000033075	ENSMUST00000044189	ensembl_havana	P59110	223870	Senp1	Sentrin-specific protease 1 [Source:UniProtKB/Swiss-Prot;Acc:P59110]	exon start=circRNA start	exon end=circRNA end	98084970-98085100 exon:ENSMUSE00001299034|98087086-98087133 exon:ENSMUSE00001215899	78.709	27.3824	0	0	0	0	6	2	0	0	0	0
CBT15_circR_870	-1.68734129830481	0.0276882	down	10	77630725	77630894	+	-	ENSMUSG00000112241	ENSMUST00000174113	havana	Q9Z172	20610	Sumo3	small ubiquitin-like modifier 3	exon start=circRNA start	exon end=circRNA end	77630726-77630761 exon:ENSMUSE00001218405|77630849-77630894 exon:ENSMUSE00001272646	0	41.0736	27.4573	0	0	0	0	3	2	0	0	0
CBT15_circR_7581	-1.68734129830481	0.0276882	down	8	45759052	45775703	+	-	ENSMUSG00000031626	ENSMUST00000067065	ensembl	B2RXQ9	234214	Sorbs2	sorbin and SH3 domain containing 2 [Source:MGI Symbol;Acc:MGI:1924574]	exon start=circRNA start	exon end=circRNA end	45759053-45759191 exon:ENSMUSE00001269555|45763019-45763191 exon:ENSMUSE00001299041|45769829-45769895 exon:ENSMUSE00001296030|45770546-45770590 exon:ENSMUSE00001250463|45772534-45772708 exon:ENSMUSE00001216148|45775589-45775703 exon:ENSMUSE00001261588	0	41.0736	27.4573	0	0	0	0	3	2	0	0	0
CBT15_circR_2272	-1.68575372008287	0.027727	down	14	103089301	103092426	-	-	ENSMUSG00000022124	ENSMUST00000022720	ensembl_havana	Q5PRF6	50789	Fbxl3	F-box/LRR-repeat protein 3 [Source:UniProtKB/Swiss-Prot;Acc:Q8C4V4]	exon start=circRNA start	exon end=circRNA end	103089302-103089473 exon:ENSMUSE00000123765|103092304-103092426 exon:ENSMUSE00000123769	0	27.3824	41.1859	0	0	0	0	2	3	0	0	0
CBT15_circR_2629	-1.68575372008287	0.027727	down	15	32269682	32271475	+	-	ENSMUSG00000022231	ENSMUST00000228103	havana	Q3UPZ0	20356	Sema5a	sema domain, seven thrombospondin repeats (type 1 and type 1-like), transmembrane domain (TM) and short cytoplasmic domain, (semaphorin) 5A	exon start=circRNA start	exon end!=circRNA end	-	0	27.3824	41.1859	0	0	0	0	2	3	0	0	0
CBT15_circR_3151	-1.68671156470224	0.0277468	down	16	93849129	93853898	+	mm9_circ_017370:circbase	ENSMUSG00000039456	ENSMUST00000044068	ensembl	F7BJB9	338467	Morc3	MORC family CW-type zinc finger protein 3 [Source:UniProtKB/Swiss-Prot;Acc:F7BJB9]	exon start=circRNA start	exon end=circRNA end	93849130-93849277 exon:ENSMUSE00000555436|93853089-93853217 exon:ENSMUSE00000555430|93853779-93853898 exon:ENSMUSE00000555428	26.2363	41.0736	0	0	0	0	2	3	0	0	0	0
CBT15_circR_1164	-1.68490843477937	0.0277909	down	11	29705534	29708770	+	mm9_circ_014561:circbase	ENSMUSG00000020458	ENSMUST00000102841	ensembl_havana	Q99P72	68585	Rtn4	reticulon 4 [Source:MGI Symbol;Acc:MGI:1915835]	exon start=circRNA start	exon end=circRNA end	29705535-29705591 exon:ENSMUSE00000375689|29706410-29708770 exon:ENSMUSE00000662786	39.3545	27.3824	0	0	0	0	3	2	0	0	0	0
CBT15_circR_1254	-1.68490843477937	0.0277909	down	11	51729451	51734661	-	-	ENSMUSG00000036391	ENSMUST00000038210	havana	Q3U2P1	77371	Sec24a	Protein transport protein Sec24A [Source:UniProtKB/Swiss-Prot;Acc:Q3U2P1]	exon start=circRNA start	exon end=circRNA end	51729452-51729575 exon:ENSMUSE00000679012|51731803-51731905 exon:ENSMUSE00001229952|51733392-51733564 exon:ENSMUSE00001226026|51733770-51733927 exon:ENSMUSE00001213625|51734584-51734661 exon:ENSMUSE00001283653	39.3545	27.3824	0	0	0	0	3	2	0	0	0	0
CBT15_circR_1881	-1.68490843477937	0.0277909	down	12	77277360	77332329	+	-	ENSMUSG00000021065	ENSMUST00000062804	ensembl_havana	Q9WTS2	53618	Fut8	fucosyltransferase 8	exon start=circRNA start	exon end=circRNA end	77277361-77277455 exon:ENSMUSE00000453763|77323845-77323937 exon:ENSMUSE00000453723|77331896-77332329 exon:ENSMUSE00000453743	39.3545	27.3824	0	0	0	0	3	2	0	0	0	0
CBT15_circR_5015	-1.68490843477937	0.0277909	down	3	152420014	152428832	+	-	ENSMUSG00000039068	ENSMUST00000089982	havana	Q6KAQ7	108946	Zzz3	zinc finger, ZZ domain containing 3 [Source:MGI Symbol;Acc:MGI:1920453]	exon start=circRNA start	exon end=circRNA end	152420015-152420140 exon:ENSMUSE00000874764|152422618-152422771 exon:ENSMUSE00001208154|152427277-152428832 exon:ENSMUSE00001305199	39.3545	27.3824	0	0	0	0	3	2	0	0	0	0
CBT15_circR_6160	-1.68490843477937	0.0277909	down	5	23450151	23467188	+	-	ENSMUSG00000029004	ENSMUST00000094962	ensembl_havana	Q3UG20	69188	Kmt2e	Histone-lysine N-methyltransferase 2E [Source:UniProtKB/Swiss-Prot;Acc:Q3UG20]	exon start=circRNA start	exon end=circRNA end	23450152-23450336 exon:ENSMUSE00000602711|23463016-23463130 exon:ENSMUSE00000265789|23464703-23464932 exon:ENSMUSE00000265780|23467108-23467188 exon:ENSMUSE00000265771	39.3545	27.3824	0	0	0	0	3	2	0	0	0	0
CBT15_circR_6395	-1.68490843477937	0.0277909	down	5	81646409	81660447	+	-	ENSMUSG00000037605	ENSMUST00000036068	ensembl	Q80TS3	319387	Adgrl3	Adhesion G protein-coupled receptor L3 [Source:UniProtKB/Swiss-Prot;Acc:Q80TS3]	exon start=circRNA start	exon end=circRNA end	81646410-81646712 exon:ENSMUSE00001259598|81648629-81648732 exon:ENSMUSE00001276414|81660262-81660447 exon:ENSMUSE00001282049	39.3545	27.3824	0	0	0	0	3	2	0	0	0	0
CBT15_circR_5687	1.65167	0.0260028	up	4	59493185	59494610	-	-	ENSMUSG00000028382	ENSMUST00000030076	ensembl_havana	Q8BHD7	230257	Ptbp3	Polypyrimidine tract-binding protein 3 [Source:UniProtKB/Swiss-Prot;Acc:Q8BHD7]	exon start=circRNA start	exon end=circRNA end	59493186-59493360 exon:ENSMUSE00001238022|59494500-59494610 exon:ENSMUSE00001214119	0	0	0	0	49.6805	49.885	0	0	0	0	4	4
CBT15_circR_6910	1.65167	0.0260028	up	7	115659515	115662444	-	-	ENSMUSG00000051910	ENSMUST00000072804	ensembl	P40645	20679	Sox6	SRY (sex determining region Y)-box 6 [Source:MGI Symbol;Acc:MGI:98368]	exon start=circRNA start	exon end=circRNA end	115659516-115659584 exon:ENSMUSE00000527721|115662272-115662444 exon:ENSMUSE00000505451	0	0	0	0	49.6805	49.885	0	0	0	0	4	4
CBT15_circR_7969	1.65167	0.0260028	up	9	45869178	45869544	-	mm9_circ_013683:circbase	ENSMUSG00000042790	ENSMUST00000058720	ensembl_havana	Q8BFU3	235315	Rnf214	RING finger protein 214 [Source:UniProtKB/Swiss-Prot;Acc:Q8BFU3]	exon start=circRNA start	exon end=circRNA end	45869179-45869277 exon:ENSMUSE00001295678|45869454-45869544 exon:ENSMUSE00001296469	0	0	0	0	49.6805	49.885	0	0	0	0	4	4
CBT15_circR_1572	-1.68048588179945	0.0282204	down	12	101043442	101049818	-	-	ENSMUSG00000041846	ENSMUST00000048305	ensembl_havana	Q6P2K6	68734	Ppp4r3a	protein phosphatase 4 regulatory subunit 3A	exon start=circRNA start	exon end=circRNA end	101043443-101043585 exon:ENSMUSE00000261585|101044490-101044659 exon:ENSMUSE00000261595|101049660-101049818 exon:ENSMUSE00000261606	26.2363	0	41.1859	0	0	0	2	0	3	0	0	0
CBT15_circR_8231	-1.68048588179945	0.0282204	down	9	96576285	96611499	-	-	ENSMUSG00000032413	ENSMUST00000034984	ensembl_havana	P58069	114713	Rasa2	Ras GTPase-activating protein 2 [Source:UniProtKB/Swiss-Prot;Acc:P58069]	exon start=circRNA start	exon end=circRNA end	96576286-96576387 exon:ENSMUSE00001321825|96577473-96577549 exon:ENSMUSE00001326148|96580487-96580559 exon:ENSMUSE00001325448|96582743-96582826 exon:ENSMUSE00001328164|96591950-96592026 exon:ENSMUSE00001323326|96602713-96602807 exon:ENSMUSE00001326192|96606093-96606196 exon:ENSMUSE00001329844|96611382-96611499 exon:ENSMUSE00001289062	26.2363	0	41.1859	0	0	0	2	0	3	0	0	0
CBT15_circR_1060	-1.68027033009852	0.0282258	down	11	110292085	110301552	-	-	ENSMUSG00000018800	ENSMUST00000043961	ensembl_havana	Q8K448	217265	Abca5	ATP-binding cassette, sub-family A (ABC1), member 5 [Source:MGI Symbol;Acc:MGI:2386607]	exon start=circRNA start	exon end=circRNA end	110292086-110292199 exon:ENSMUSE00000229966|110293240-110293377 exon:ENSMUSE00000229973|110293787-110293914 exon:ENSMUSE00000229978|110296468-110296637 exon:ENSMUSE00000229986|110298036-110298237 exon:ENSMUSE00000229994|110299891-110300010 exon:ENSMUSE00000230001|110301413-110301552 exon:ENSMUSE00000230009	39.3545	0	27.4573	0	0	0	3	0	2	0	0	0
CBT15_circR_5519	-1.68027033009852	0.0282258	down	4	141516835	141522392	-	-	ENSMUSG00000040761	ENSMUST00000078886	havana	Q3UV27	56381	Spen	spen family transcription repressor [Source:MGI Symbol;Acc:MGI:1891706]	exon start=circRNA start	exon end=circRNA end	141516836-141517318 exon:ENSMUSE00000361238|141522072-141522392 exon:ENSMUSE00000308392	39.3545	0	27.4573	0	0	0	3	0	2	0	0	0
CBT15_circR_2932	1.66102	0.0266335	up	16	17015897	17018503	+	-	ENSMUSG00000063358	ENSMUST00000069107	ensembl	P63085	26413	Mapk1	Mus musculus mitogen-activated protein kinase 1 (Mapk1), transcript variant 3, mRNA. [Source:RefSeq mRNA;Acc:NM_001357115]	exon start=circRNA start	exon end!=circRNA end	-	0	0	0	25.0008	0	37.4137	0	0	0	2	0	3
CBT15_circR_4485	1.66102	0.0266335	up	2	167507046	167511326	+	-	ENSMUSG00000006418	ENSMUST00000078050	ensembl_havana	Q9ET26	81018	Rnf114	E3 ubiquitin-protein ligase RNF114 [Source:UniProtKB/Swiss-Prot;Acc:Q9ET26]	exon start=circRNA start	exon end=circRNA end	167507047-167507197 exon:ENSMUSE00000172363|167510876-167510982 exon:ENSMUSE00001309098|167511212-167511326 exon:ENSMUSE00001273766	0	0	0	25.0008	0	37.4137	0	0	0	2	0	3
CBT15_circR_5562	1.66102	0.0266335	up	4	150406195	150406664	+	mm9_circ_006017:circbase	ENSMUSG00000039852	ENSMUST00000105682	ensembl_havana	Q80TZ9	68703	Rere	Arginine-glutamic acid dipeptide repeats protein [Source:UniProtKB/Swiss-Prot;Acc:Q80TZ9]	exon start=circRNA start	exon end=circRNA end	150406196-150406664 exon:ENSMUSE00000667081	0	0	0	25.0008	0	37.4137	0	0	0	2	0	3
CBT15_circR_7090	1.66102	0.0266335	up	7	27121651	27125003	+	-	ENSMUSG00000052974	ENSMUST00000003100	ensembl_havana	P33267	13107	Cyp2f2	Cytochrome P450 2F2 [Source:UniProtKB/Swiss-Prot;Acc:P33267]	exon start!=circRNA start	exon end=circRNA end	-	0	0	0	25.0008	0	37.4137	0	0	0	2	0	3
CBT15_circR_3081	-1.91417727983277	0.0283326	down	16	52164295	52174448	+	-	ENSMUSG00000022637	ENSMUST00000114471	ensembl_havana	Q3TTA7	208650	Cblb	Casitas B-lineage lymphoma b	exon start=circRNA start	exon end=circRNA end	52164296-52164481 exon:ENSMUSE00000129091|52165989-52166351 exon:ENSMUSE00000233428|52174354-52174448 exon:ENSMUSE00000514596	39.3545	41.0736	0	0	24.8402	24.9425	3	3	0	0	2	2
CBT15_circR_5350	-2.57030513832895	0.0283647	down	4	121182605	121190258	-	mm9_circ_018293:circbase	ENSMUSG00000049878	ENSMUST00000056635	havana	E9Q532	109263	Rlf	Mus musculus rearranged L-myc fusion sequence (Rlf), mRNA. [Source:RefSeq mRNA;Acc:NM_001346660]	exon start=circRNA start	exon end=circRNA end	121182606-121182738 exon:ENSMUSE00000599745|121188215-121188296 exon:ENSMUSE00000669269|121190104-121190258 exon:ENSMUSE00000669271	91.8271	109.53	219.658	50.0015	0	62.3562	7	8	16	4	0	5
CBT15_circR_4438	-1.88701801270205	0.0288985	down	2	160750962	160752574	+	-	ENSMUSG00000016933	ENSMUST00000017077	havana	Q62077	18803	Plcg1	1-phosphatidylinositol 4,5-bisphosphate phosphodiesterase gamma-1 [Source:UniProtKB/Swiss-Prot;Acc:Q62077]	exon start=circRNA start	exon end=circRNA end	160750963-160751047 exon:ENSMUSE00001280885|160751143-160751226 exon:ENSMUSE00001305868|160751436-160751470 exon:ENSMUSE00001312660|160751633-160751705 exon:ENSMUSE00001212787|160751784-160751885 exon:ENSMUSE00001224927|160752088-160752206 exon:ENSMUSE00001255019|160752295-160752380 exon:ENSMUSE00001278461|160752454-160752574 exon:ENSMUSE00001293075	0	27.3824	68.6432	0	0	0	0	2	5	0	0	0
CBT15_circR_4374	1.77531	0.0271817	up	2	152302151	152308431	+	mm9_circ_010040:circbase	ENSMUSG00000027465	ENSMUST00000028963	ensembl_havana	Q0P648	67231	Tbc1d20	TBC1 domain family member 20 [Source:UniProtKB/Swiss-Prot;Acc:Q9D9I4]	exon start=circRNA start	exon end=circRNA end	152302152-152302337 exon:ENSMUSE00001296735|152304946-152305026 exon:ENSMUSE00001289405|152307989-152308175 exon:ENSMUSE00000169764|152308330-152308431 exon:ENSMUSE00000169765	0	0	0	62.5019	37.2604	24.9425	0	0	0	5	3	2
CBT15_circR_202	-1.46418301094806	0.0285582	down	1	16440322	16509408	-	mm9_circ_006026:circbase	ENSMUSG00000025920	ENSMUST00000027052	ensembl_havana	Q8CJ67	29819	Stau2	staufen double-stranded RNA binding protein 2 [Source:MGI Symbol;Acc:MGI:1352508]	exon start=circRNA start	exon end=circRNA end	16440323-16440458 exon:ENSMUSE00001299794|16463035-16463194 exon:ENSMUSE00001343131|16509342-16509408 exon:ENSMUSE00001241858	0	27.3824	27.4573	0	0	0	0	2	2	0	0	0
CBT15_circR_530	-1.46418301094806	0.0285582	down	1	87880367	87881939	+	mm9_circ_011975:circbase	ENSMUSG00000070738	ENSMUST00000027517	ensembl_havana	E9PUQ8	227333	Dgkd	diacylglycerol kinase delta [Source:HGNC Symbol;Acc:HGNC:2851]	exon start=circRNA start	exon end=circRNA end	87880368-87880478 exon:ENSMUSE00000881533|87881859-87881939 exon:ENSMUSE00000878857	0	27.3824	27.4573	0	0	0	0	2	2	0	0	0
CBT15_circR_3013	-1.46418301094806	0.0285582	down	16	33421320	33468183	+	mm9_circ_018765:circbase	ENSMUSG00000022811	ENSMUST00000089677	ensembl	Q3UJ69	22661	Zfp148	zinc finger protein 148	exon start=circRNA start	exon end=circRNA end	33421321-33421402 exon:ENSMUSE00000225503|33427194-33427329 exon:ENSMUSE00000225491|33434626-33434974 exon:ENSMUSE00000434605|33456876-33457001 exon:ENSMUSE00000130672|33466855-33466978 exon:ENSMUSE00000130673|33468100-33468183 exon:ENSMUSE00000130668	0	27.3824	27.4573	0	0	0	0	2	2	0	0	0
CBT15_circR_7704	-1.91484095476627	0.0290758	down	8	86860425	86862110	-	mm9_circ_009789:circbase	ENSMUSG00000031652	ENSMUST00000034074	ensembl_havana	Q6A037	80750	N4bp1	NEDD4-binding protein 1 [Source:UniProtKB/Swiss-Prot;Acc:Q6A037]	exon start=circRNA start	exon end=circRNA end	86860426-86862110 exon:ENSMUSE00001048106	0	68.456	27.4573	0	0	0	0	5	2	0	0	0
CBT15_circR_2902	1.74985	0.0239467	up	16	11116794	11128703	-	mm9_circ_016242:circbase	ENSMUSG00000022498	ENSMUST00000038424	ensembl_havana	Q8K2W3	106200	Txndc11	thioredoxin domain containing 11 [Source:MGI Symbol;Acc:MGI:1923620]	exon start=circRNA start	exon end=circRNA end	11116795-11116924 exon:ENSMUSE00001298792|11122670-11122767 exon:ENSMUSE00001238605|11128487-11128703 exon:ENSMUSE00000383733	26.2363	177.986	68.6432	112.503	385.024	311.781	2	13	5	9	31	25
CBT15_circR_130	-1.68055945869268	0.0296541	down	1	143667624	143677855	-	-	ENSMUSG00000026361	ENSMUST00000018337	ensembl_havana	Q8JZM7	214498	Cdc73	Parafibromin [Source:UniProtKB/Swiss-Prot;Acc:Q8JZM7]	exon start=circRNA start	exon end=circRNA end	143667625-143667689 exon:ENSMUSE00000158418|143669990-143670068 exon:ENSMUSE00000158416|143671330-143671428 exon:ENSMUSE00000158419|143677639-143677855 exon:ENSMUSE00000158425	26.2363	41.0736	0	0	24.8402	0	2	3	0	0	2	0
CBT15_circR_8295	-1.67875632876981	0.029703	down	X	108803981	108805597	-	-	ENSMUSG00000063663	ENSMUST00000041866	havana	A2AHJ4	382236	Brwd3	Bromodomain and WD repeat-containing protein 3 [Source:UniProtKB/Swiss-Prot;Acc:A2AHJ4]	exon start=circRNA start	exon end=circRNA end	108803982-108804203 exon:ENSMUSE00001231898|108805437-108805597 exon:ENSMUSE00001225932	39.3545	27.3824	0	0	24.8402	0	3	2	0	0	2	0
CBT15_circR_949	1.77721	0.0287244	up	10	9798121	9800068	-	mm9_circ_010719:circbase	ENSMUSG00000019790	ENSMUST00000038213	havana	D3Z079	78808	Stxbp5	Syntaxin-binding protein 5 [Source:UniProtKB/Swiss-Prot;Acc:Q8K400]	exon start=circRNA start	exon end=circRNA end	9798122-9798273 exon:ENSMUSE00000415947|9799943-9800068 exon:ENSMUSE00000415952	0	0	0	25.0008	0	49.885	0	0	0	2	0	4
CBT15_circR_1893	1.77721	0.0287244	up	12	79263772	79264433	-	-	ENSMUSG00000066440	ENSMUST00000021547	ensembl_havana	Q5DU37	211978	Zfyve26	zinc finger, FYVE domain containing 26	exon start=circRNA start	exon end=circRNA end	79263773-79263949 exon:ENSMUSE00000612459|79264311-79264433 exon:ENSMUSE00000612460	0	0	0	25.0008	0	49.885	0	0	0	2	0	4
CBT15_circR_45	-1.4580309049385	0.0309299	down	1	119567795	119579077	-	-	ENSMUSG00000026383	ENSMUST00000052404	ensembl_havana	Q8BGS1	226352	Epb41l5	Band 4.1-like protein 5 [Source:UniProtKB/Swiss-Prot;Acc:Q8BGS1]	exon start=circRNA start	exon end=circRNA end	119567796-119567860 exon:ENSMUSE00000436318|119570045-119570173 exon:ENSMUSE00000436326|119572806-119572903 exon:ENSMUSE00000436338|119578914-119579077 exon:ENSMUSE00000436346	0	27.3824	27.4573	0	24.8402	0	0	2	2	0	2	0
CBT15_circR_4039	-1.43893675813737	0.0258785	down	19	53987453	53988383	+	mm9_circ_009715:circbase	ENSMUSG00000024976	ENSMUST00000025932	ensembl	O88520	56392	Shoc2	soc-2 (suppressor of clear) homolog (C. elegans)	exon start=circRNA start	exon end=circRNA end	53987454-53988383 exon:ENSMUSE00000354840	249.245	150.603	123.558	25.0008	62.1006	137.184	19	11	9	2	5	11
CBT15_circR_7331	-1.43474650353606	0.0316246	down	8	105773908	105774643	-	-	ENSMUSG00000037415	ENSMUST00000041400	ensembl_havana	A0A0R4J0G4	74334	Ranbp10	RAN binding protein 10 [Source:MGI Symbol;Acc:MGI:1921584]	exon start=circRNA start	exon end=circRNA end	105773909-105774113 exon:ENSMUSE00000343082|105774287-105774435 exon:ENSMUSE00000228032|105774535-105774643 exon:ENSMUSE00000228062	26.2363	27.3824	0	0	0	0	2	2	0	0	0	0
CBT15_circR_8114	-1.43474650353606	0.0316246	down	9	69047156	69047480	-	-	ENSMUSG00000032238	ENSMUST00000034766	ensembl_havana	P51448	19883	Rora	RAR-related orphan receptor alpha [Source:MGI Symbol;Acc:MGI:104661]	transcript start<=circRNA start	transcript end>=circRNA end	-	26.2363	27.3824	0	0	0	0	2	2	0	0	0	0
CBT15_circR_378	1.71556	0.0306486	up	1	51813002	51863434	-	-	ENSMUSG00000018417	ENSMUST00000018561	ensembl_havana	Q7TQD7	17912	Myo1b	myosin IB [Source:MGI Symbol;Acc:MGI:107752]	exon start=circRNA start	exon end=circRNA end	51813003-51813066 exon:ENSMUSE00001311028|51820141-51820187 exon:ENSMUSE00001231875|51824097-51824201 exon:ENSMUSE00001206507|51834449-51834543 exon:ENSMUSE00001207134|51863319-51863434 exon:ENSMUSE00001267839	0	0	0	37.5011	0	37.4137	0	0	0	3	0	3
CBT15_circR_1290	1.71556	0.0306486	up	11	59700126	59700309	+	-	ENSMUSG00000005417	ENSMUST00000066330	havana	P97434	26936	Mprip	Myosin phosphatase Rho-interacting protein [Source:UniProtKB/Swiss-Prot;Acc:P97434]	transcript start<=circRNA start	transcript end>=circRNA end	-	0	0	0	37.5011	0	37.4137	0	0	0	3	0	3
CBT15_circR_4609	1.71556	0.0306486	up	2	27089583	27098703	+	-	ENSMUSG00000036040	ENSMUST00000091233	ensembl_havana	A1A5B7	77794	Adamtsl2	ADAMTS-like protein 2 [Source:UniProtKB/Swiss-Prot;Acc:Q7TSK7]	exon start=circRNA start	exon end=circRNA end	27089584-27089759 exon:ENSMUSE00000332278|27093533-27093890 exon:ENSMUSE00000502154|27095403-27095772 exon:ENSMUSE00000470403|27098606-27098703 exon:ENSMUSE00000471675	0	0	0	37.5011	0	37.4137	0	0	0	3	0	3
CBT15_circR_5985	1.71556	0.0306486	up	5	130179654	130180308	+	-	ENSMUSG00000025340	ENSMUST00000119797	ensembl_havana	Q9JM13	56715	Rabgef1	Rab5 GDP/GTP exchange factor [Source:UniProtKB/Swiss-Prot;Acc:Q9JM13]	transcript start<=circRNA start	transcript end>=circRNA end	-	0	0	0	37.5011	0	37.4137	0	0	0	3	0	3
CBT15_circR_6804	-1.80365204158393	0.0330975	down	6	88281548	88298236	-	-	ENSMUSG00000033216	ENSMUST00000165242	ensembl_havana	Q9JHW4	65967	Eefsec	Selenocysteine-specific elongation factor [Source:UniProtKB/Swiss-Prot;Acc:Q9JHW4]	exon start=circRNA start	exon end=circRNA end	88281549-88281705 exon:ENSMUSE00000322198|88297577-88298236 exon:ENSMUSE00000322209	52.4726	0	27.4573	0	37.2604	0	4	0	2	0	3	0
CBT15_circR_6846	-1.79992613795337	0.0334764	down	6	99428788	99435345	-	mm9_circ_015271:circbase	ENSMUSG00000030067	ENSMUST00000113322	ensembl	P58462	108655	Foxp1	Mus musculus forkhead box P1 (Foxp1), transcript variant 4, mRNA. [Source:RefSeq mRNA;Acc:NM_001347345]	exon start!=circRNA start	exon end=circRNA end	-	52.4726	27.3824	0	0	37.2604	0	4	2	0	0	3	0
CBT15_circR_2822	1.82429	0.0312165	up	15	85359453	85376702	+	mm9_circ_011119:circbase	ENSMUSG00000016541	ENSMUST00000163242	ensembl_havana	P28658	54138	Atxn10	ataxin 10	exon start=circRNA start	exon end=circRNA end	85359454-85359645 exon:ENSMUSE00000315097|85365277-85365359 exon:ENSMUSE00000378056|85375322-85375418 exon:ENSMUSE00000332204|85376544-85376702 exon:ENSMUSE00000380276	0	0	0	37.5011	0	49.885	0	0	0	3	0	4
CBT15_circR_7058	-1.80109772437499	0.0344734	down	7	16847600	16850347	+	-	ENSMUSG00000041187	ENSMUST00000086104	ensembl_havana	Q8BZ03	101540	Prkd2	protein kinase D2 [Source:MGI Symbol;Acc:MGI:2141917]	exon start=circRNA start	exon end=circRNA end	16847601-16847732 exon:ENSMUSE00000637047|16848725-16848879 exon:ENSMUSE00000637046|16848981-16849206 exon:ENSMUSE00000637045|16850025-16850102 exon:ENSMUSE00000637044|16850194-16850347 exon:ENSMUSE00000536811	52.4726	0	27.4573	0	0	24.9425	4	0	2	0	0	2
CBT15_circR_1400	-1.41542522156988	0.0337654	down	11	74836362	74842353	+	-	ENSMUSG00000000282	ENSMUST00000000291	ensembl_havana	O08789	17428	Mnt	Max-binding protein MNT [Source:UniProtKB/Swiss-Prot;Acc:O08789]	exon start=circRNA start	exon end=circRNA end	74836363-74836948 exon:ENSMUSE00000110573|74837431-74837472 exon:ENSMUSE00001237643|74837612-74837723 exon:ENSMUSE00001310183|74842161-74842353 exon:ENSMUSE00000110571	26.2363	0	27.4573	0	0	0	2	0	2	0	0	0
CBT15_circR_4439	-1.41542522156988	0.0337654	down	2	160779400	160782379	-	-	ENSMUSG00000035877	ENSMUST00000103111	havana	Q8C0Q2	320799	Zhx3	zinc fingers and homeoboxes 3 [Source:MGI Symbol;Acc:MGI:2444772]	exon start=circRNA start	exon end=circRNA end	160779401-160782379 exon:ENSMUSE00000661298	26.2363	0	27.4573	0	0	0	2	0	2	0	0	0
CBT15_circR_6464	-1.41542522156988	0.0337654	down	6	116042870	116043805	-	mm9_circ_003215:circbase	ENSMUSG00000030126	ENSMUST00000032222	havana	Q69ZZ6	330401	Tmcc1	transmembrane and coiled coil domains 1 [Source:MGI Symbol;Acc:MGI:2442368]	exon start=circRNA start	exon end=circRNA end	116042871-116043805 exon:ENSMUSE00001268170	26.2363	0	27.4573	0	0	0	2	0	2	0	0	0
CBT15_circR_8109	-1.41542522156988	0.0337654	down	9	66562553	66566903	-	mm9_circ_003144:circbase	ENSMUSG00000032376	ENSMUST00000034940	havana	Q91W36	235441	Usp3	ubiquitin specific peptidase 3 [Source:MGI Symbol;Acc:MGI:2152450]	exon start=circRNA start	exon end=circRNA end	66562554-66562685 exon:ENSMUSE00001239994|66566843-66566903 exon:ENSMUSE00001263985	26.2363	0	27.4573	0	0	0	2	0	2	0	0	0
CBT15_circR_1791	1.60391	0.0290531	up	12	51759218	51761170	-	mm9_circ_002888:circbase	ENSMUSG00000035247	ENSMUST00000042052	ensembl_havana	F8WIE5	207304	Hectd1	HECT domain E3 ubiquitin protein ligase 1	exon start=circRNA start	exon end=circRNA end	51759219-51759441 exon:ENSMUSE00000532314|51761014-51761170 exon:ENSMUSE00000532315	26.2363	68.456	151.015	100.003	298.083	299.31	2	5	11	8	24	24
CBT15_circR_843	-1.67246960003187	0.035465	down	10	75261793	75276927	+	-	ENSMUSG00000033444	ENSMUST00000040105	ensembl	Q8C9Q9	74392	Specc1l	sperm antigen with calponin homology and coiled-coil domains 1-like	exon start=circRNA start	exon end=circRNA end	75261794-75261957 exon:ENSMUSE00000226658|75263279-75263370 exon:ENSMUSE00000226650|75267499-75267589 exon:ENSMUSE00000226646|75274017-75274100 exon:ENSMUSE00000226642|75276771-75276927 exon:ENSMUSE00000226635	39.3545	27.3824	0	0	37.2604	0	3	2	0	0	3	0
CBT15_circR_5230	1.89411	0.0320694	up	3	9565063	9565299	-	-	ENSMUSG00000040209	ENSMUST00000041124	ensembl_havana	Q9ERQ3	170753	Zfp704	zinc finger protein 704 [Source:MGI Symbol;Acc:MGI:2180715]	exon start=circRNA start	exon end=circRNA end	9565064-9565299 exon:ENSMUSE00000310517	0	0	0	37.5011	0	62.3562	0	0	0	3	0	5
CBT15_circR_8204	1.89541	0.0325995	up	9	83988775	84012619	+	mm9_circ_009629:circbase	ENSMUSG00000032263	ENSMUST00000034801	ensembl	Q6P3A8	12040	Bckdhb	2-oxoisovalerate dehydrogenase subunit beta, mitochondrial [Source:UniProtKB/Swiss-Prot;Acc:Q6P3A8]	exon start=circRNA start	exon end=circRNA end	83988776-83988909 exon:ENSMUSE00000218214|83989141-83989296 exon:ENSMUSE00000218216|83991714-83991822 exon:ENSMUSE00000218221|84010254-84010351 exon:ENSMUSE00000218219|84012509-84012619 exon:ENSMUSE00000218218	0	0	0	25.0008	0	74.8275	0	0	0	2	0	6
CBT15_circR_6538	2.54075	0.0391103	up	6	134062063	134066465	+	mm9_circ_003371:circbase	ENSMUSG00000030199	ENSMUST00000111963	havana	P97360	14011	Etv6	Transcription factor ETV6 [Source:UniProtKB/Swiss-Prot;Acc:P97360]	exon start!=circRNA start	exon end=circRNA end	-	118.063	0	0	100.003	136.621	87.2987	9	0	0	8	11	7
CBT15_circR_7586	-1.66991528282292	0.0370913	down	8	46103514	46116398	-	-	ENSMUSG00000038291	ENSMUST00000041582	havana	Q3ZT31	102141	Snx25	Sorting nexin-25 [Source:UniProtKB/Swiss-Prot;Acc:Q3ZT31]	exon start=circRNA start	exon end=circRNA end	46103515-46103701 exon:ENSMUSE00001241737|46105119-46105291 exon:ENSMUSE00001295175|46116182-46116398 exon:ENSMUSE00000683711	39.3545	27.3824	0	0	0	24.9425	3	2	0	0	0	2
CBT15_circR_5598	-2.25240914904781	0.0361246	down	4	16151916	16158430	-	-	ENSMUSG00000041135	ENSMUST00000037035	ensembl_havana	Q547H1	192656	Ripk2	receptor (TNFRSF)-interacting serine-threonine kinase 2 [Source:MGI Symbol;Acc:MGI:1891456]	exon start=circRNA start	exon end=circRNA end	16151917-16152074 exon:ENSMUSE00001287181|16155035-16155190 exon:ENSMUSE00001247075|16158277-16158430 exon:ENSMUSE00001274626	52.4726	0	68.6432	0	49.6805	0	4	0	5	0	4	0
CBT15_circR_2216	-1.66549272984301	0.0376114	down	13	9122107	9151224	+	-	ENSMUSG00000033499	ENSMUST00000091829	havana	Q6A0A2	217980	Larp4b	La-related protein 4B [Source:UniProtKB/Swiss-Prot;Acc:Q6A0A2]	exon start=circRNA start	exon end=circRNA end	9122108-9122226 exon:ENSMUSE00000572077|9123903-9123962 exon:ENSMUSE00000643976|9136779-9136926 exon:ENSMUSE00000643972|9137155-9137301 exon:ENSMUSE00000643968|9143754-9143832 exon:ENSMUSE00000643964|9145382-9145518 exon:ENSMUSE00000643960|9147401-9147504 exon:ENSMUSE00000643959|9149826-9149936 exon:ENSMUSE00000252145|9150865-9150918 exon:ENSMUSE00000252139|9151015-9151224 exon:ENSMUSE00000252132	26.2363	0	41.1859	0	0	24.9425	2	0	3	0	0	2
CBT15_circR_4742	1.942	0.040738	up	2	59948086	59962630	-	mm9_circ_009319:circbase	ENSMUSG00000026987	ENSMUST00000090925	ensembl	A2AUY4	407823	Baz2b	bromodomain adjacent to zinc finger domain, 2B [Source:MGI Symbol;Acc:MGI:2442782]	exon start=circRNA start	exon end=circRNA end	59948087-59948297 exon:ENSMUSE00000478849|59957630-59957738 exon:ENSMUSE00000502710|59958432-59958492 exon:ENSMUSE00001257669|59959821-59960105 exon:ENSMUSE00000504957|59962021-59962630 exon:ENSMUSE00000505777	26.2363	0	68.6432	87.5027	124.201	87.2987	2	0	5	7	10	7
CBT15_circR_3987	-2.11746809467256	0.0397224	down	19	4320151	4321056	-	-	ENSMUSG00000054611	ENSMUST00000047898	ensembl_havana	P59997	225876	Kdm2a	lysine demethylase 2A [Source:HGNC Symbol;Acc:HGNC:13606]	exon start=circRNA start	exon end=circRNA end	4320152-4320367 exon:ENSMUSE00001276277|4320898-4321056 exon:ENSMUSE00001268284	118.063	95.8384	82.3719	75.0023	49.6805	0	9	7	6	6	4	0
CBT15_circR_3422	-2.26622292556565	0.0372169	down	17	64624527	64625451	+	mm9_circ_006640:circbase	ENSMUSG00000024085	ENSMUST00000086723	ensembl_havana	Q8C4L1	17158	Man2a1	Alpha-mannosidase 2 [Source:UniProtKB/Swiss-Prot;Acc:P27046]	exon start=circRNA start	exon end=circRNA end	64624528-64624779 exon:ENSMUSE00000306920|64625307-64625451 exon:ENSMUSE00000306900	0	68.456	54.9146	0	49.6805	0	0	5	4	0	4	0
CBT15_circR_391	2.11059	0.0328008	up	1	53885328	53914632	-	mm9_circ_013054:circbase	ENSMUSG00000042807	ENSMUST00000087659	ensembl	Q6I6G8	329152	Hecw2	E3 ubiquitin-protein ligase HECW2 [Source:UniProtKB/Swiss-Prot;Acc:Q6I6G8]	exon start=circRNA start	exon end=circRNA end	53885329-53885425 exon:ENSMUSE00000547114|53887583-53887685 exon:ENSMUSE00000547117|53891126-53891260 exon:ENSMUSE00000547121|53904249-53904434 exon:ENSMUSE00000547125|53913241-53913365 exon:ENSMUSE00000547128|53913767-53913870 exon:ENSMUSE00000547131|53914482-53914632 exon:ENSMUSE00000547134	0	0	0	62.5019	0	87.2987	0	0	0	5	0	7
CBT15_circR_2628	-2.34977955473339	0.0374248	down	15	32269682	32271404	+	-	ENSMUSG00000022231	ENSMUST00000228103	havana	Q3UPZ0	20356	Sema5a	sema domain, seven thrombospondin repeats (type 1 and type 1-like), transmembrane domain (TM) and short cytoplasmic domain, (semaphorin) 5A	exon start=circRNA start	exon end!=circRNA end	-	0	68.456	68.6432	0	0	37.4137	0	5	5	0	0	3
CBT15_circR_4028	-2.23424683715656	0.0380593	down	19	4784723	4794009	-	mm9_circ_001009:circbase	ENSMUSG00000096370	ENSMUST00000177776	havana	F7BGR7	102902673	Gm21992	predicted gene 21992	exon start!=circRNA start	exon end=circRNA end	-	0	54.7648	68.6432	0	49.6805	0	0	4	5	0	4	0
CBT15_circR_3744	-1.05271360983445	0.0299048	down	18	65638749	65656632	+	mm9_circ_001096:circbase	ENSMUSG00000042439	ENSMUST00000182852	havana	Q3TQ12	328977	Zfp532	zinc finger protein 532 [Source:MGI Symbol;Acc:MGI:3036282]	exon start=circRNA start	exon end=circRNA end	65638750-65638931 exon:ENSMUSE00001272046|65644193-65644369 exon:ENSMUSE00001312874|65651560-65651722 exon:ENSMUSE00001297429|65656351-65656632 exon:ENSMUSE00001225933	183.654	219.059	109.829	62.5019	136.621	74.8275	14	16	8	5	11	6
CBT15_circR_2806	-2.50292906639009	0.0378897	down	15	82825230	82857284	-	mm9_circ_000890:circbase	ENSMUSG00000041852	ENSMUST00000048966	ensembl_havana	Q80U46	21411	Tcf20	transcription factor 20	exon start=circRNA start	exon end=circRNA end	82825231-82825324 exon:ENSMUSE00000647351|82851513-82857284 exon:ENSMUSE00000474361	0	41.0736	164.744	0	49.6805	0	0	3	12	0	4	0
CBT15_circR_635	1.60819	0.0344209	up	10	127290775	127295055	-	-	ENSMUSG00000092384	ENSMUST00000174167	havana	-	100043045	Gm4189	predicted gene 4189 [Source:MGI Symbol;Acc:MGI:3782365]	exon start=circRNA start	exon end!=circRNA end	-	0	0	0	25.0008	24.8402	0	0	0	0	2	2	0
CBT15_circR_4475	1.60819	0.0344209	up	2	166885778	166893618	+	-	ENSMUSG00000074582	ENSMUST00000099078	ensembl_havana	A2A5R2	99371	Arfgef2	Brefeldin A-inhibited guanine nucleotide-exchange protein 2 [Source:UniProtKB/Swiss-Prot;Acc:A2A5R2]	exon start=circRNA start	exon end=circRNA end	166885779-166885909 exon:ENSMUSE00000639069|166890269-166890437 exon:ENSMUSE00000639068|166891767-166891905 exon:ENSMUSE00000639067|166893501-166893618 exon:ENSMUSE00000639065	0	0	0	25.0008	24.8402	0	0	0	0	2	2	0
CBT15_circR_5247	1.60819	0.0344209	up	3	98070859	98072922	+	-	ENSMUSG00000027878	ENSMUST00000079812	ensembl_havana	G5E8J0	18129	Notch2	notch 2 [Source:HGNC Symbol;Acc:HGNC:7882]	exon start=circRNA start	exon end=circRNA end	98070860-98071119 exon:ENSMUSE00000404985|98072587-98072922 exon:ENSMUSE00000244757	0	0	0	25.0008	24.8402	0	0	0	0	2	2	0
CBT15_circR_7623	1.60819	0.0344209	up	8	70251613	70252101	+	-	ENSMUSG00000036054	ENSMUST00000093458	ensembl_havana	Q8CH09	234373	Sugp2	SURP and G-patch domain-containing protein 2 [Source:UniProtKB/Swiss-Prot;Acc:Q8CH09]	exon start=circRNA start	exon end=circRNA end	70251614-70252101 exon:ENSMUSE00001229397	0	0	0	25.0008	24.8402	0	0	0	0	2	2	0
CBT15_circR_6240	-1.44918985899162	0.0402616	down	5	33843111	33868878	+	mm9_circ_010792:circbase	ENSMUSG00000057406	ENSMUST00000066854	ensembl	Q8BVE8	107823	Nsd2	Histone-lysine N-methyltransferase NSD2 [Source:UniProtKB/Swiss-Prot;Acc:Q8BVE8]	exon start=circRNA start	exon end=circRNA end	33843112-33843737 exon:ENSMUSE00000508043|33846105-33846267 exon:ENSMUSE00000510089|33854610-33854776 exon:ENSMUSE00000600774|33855254-33855736 exon:ENSMUSE00000516619|33861034-33861178 exon:ENSMUSE00000654282|33864660-33864778 exon:ENSMUSE00000654281|33867574-33867658 exon:ENSMUSE00001216497|33868754-33868878 exon:ENSMUSE00001212338	0	27.3824	27.4573	0	0	24.9425	0	2	2	0	0	2
CBT15_circR_1300	-2.23552613955372	0.0402236	down	11	60747865	60749589	-	-	ENSMUSG00000002814	ENSMUST00000002891	ensembl_havana	O70157	21975	Top3a	topoisomerase (DNA) III alpha [Source:MGI Symbol;Acc:MGI:1197527]	exon start=circRNA start	exon end=circRNA end	60747866-60748031 exon:ENSMUSE00000106101|60748112-60748225 exon:ENSMUSE00000106095|60749166-60749295 exon:ENSMUSE00000106103|60749404-60749589 exon:ENSMUSE00000106098	65.5908	54.7648	0	0	0	37.4137	5	4	0	0	0	3
CBT15_circR_1932	1.33701	0.039033	up	12	84934151	84951381	-	-	ENSMUSG00000042350	ENSMUST00000043169	ensembl_havana	Q8CHG5	68497	Arel1	Apoptosis-resistant E3 ubiquitin protein ligase 1 [Source:UniProtKB/Swiss-Prot;Acc:Q8CHG5]	exon start=circRNA start	exon end=circRNA end	84934152-84934399 exon:ENSMUSE00000270503|84934570-84934750 exon:ENSMUSE00001271546|84934954-84935123 exon:ENSMUSE00001292333|84940160-84940397 exon:ENSMUSE00000270522|84941731-84941957 exon:ENSMUSE00000365669|84943332-84943392 exon:ENSMUSE00000335940|84951053-84951381 exon:ENSMUSE00000431898	0	0	0	0	49.6805	37.4137	0	0	0	0	4	3
CBT15_circR_2787	1.33701	0.039033	up	15	80901883	80902712	+	-	ENSMUSG00000047888	ENSMUST00000067689	ensembl_havana	Q8BWL0	213988	Tnrc6b	trinucleotide repeat containing 6b	exon start=circRNA start	exon end=circRNA end	80901884-80902015 exon:ENSMUSE00000395778|80902288-80902386 exon:ENSMUSE00000418181|80902520-80902712 exon:ENSMUSE00000342147	0	0	0	0	49.6805	37.4137	0	0	0	0	4	3
CBT15_circR_2823	1.33701	0.039033	up	15	85359453	85387156	+	-	ENSMUSG00000016541	ENSMUST00000163242	ensembl_havana	P28658	54138	Atxn10	ataxin 10	exon start=circRNA start	exon end=circRNA end	85359454-85359645 exon:ENSMUSE00000315097|85365277-85365359 exon:ENSMUSE00000378056|85375322-85375418 exon:ENSMUSE00000332204|85376544-85376702 exon:ENSMUSE00000380276|85382904-85382984 exon:ENSMUSE00000315078|85386991-85387156 exon:ENSMUSE00000126082	0	0	0	0	49.6805	37.4137	0	0	0	0	4	3
CBT15_circR_4137	1.33701	0.039033	up	19	9005731	9006108	+	-	ENSMUSG00000069833	ENSMUST00000092955	ensembl	Q8BRB8	66395	Ahnak	AHNAK nucleoprotein (desmoyokin)	transcript start<=circRNA start	transcript end>=circRNA end	-	0	0	0	0	49.6805	37.4137	0	0	0	0	4	3
CBT15_circR_5824	1.33701	0.039033	up	5	103501366	103501912	+	mm9_circ_012843:circbase	ENSMUSG00000034573	ENSMUST00000048957	ensembl_havana	Q8BV52	19249	Ptpn13	protein tyrosine phosphatase, non-receptor type 13 [Source:HGNC Symbol;Acc:HGNC:9646]	exon start=circRNA start	exon end=circRNA end	103501367-103501912 exon:ENSMUSE00000318151	0	0	0	0	49.6805	37.4137	0	0	0	0	4	3
CBT15_circR_8143	1.33701	0.039033	up	9	71546668	71552364	-	-	ENSMUSG00000092137	ENSMUST00000163998	havana	E9Q3C8,E9Q8U3,E9Q2N5,E9PZ54	-	Gcom1	-	exon start=circRNA start	exon end=circRNA end	71546669-71546774 exon:ENSMUSE00001211713|71548724-71548803 exon:ENSMUSE00001244073|71550179-71550307 exon:ENSMUSE00001276616|71552239-71552364 exon:ENSMUSE00001309245	0	0	0	0	49.6805	37.4137	0	0	0	0	4	3
CBT15_circR_8449	1.33701	0.039033	up	Y	1151947	1158634	-	-	ENSMUSG00000068457	ENSMUST00000069309	ensembl_havana	G3X9F2	22290	Uty	ubiquitously transcribed tetratricopeptide repeat gene, Y chromosome [Source:MGI Symbol;Acc:MGI:894810]	exon start=circRNA start	exon end=circRNA end	1151948-1152153 exon:ENSMUSE00001298158|1152769-1152874 exon:ENSMUSE00001275177|1154155-1154284 exon:ENSMUSE00001275725|1157907-1158634 exon:ENSMUSE00001232923	0	0	0	0	49.6805	37.4137	0	0	0	0	4	3
CBT15_circR_1369	-1.84382173951404	0.0488016	down	11	69734851	69735011	+	-	ENSMUSG00000005198	ENSMUST00000058470	havana	P08775	20020	Polr2a	DNA-directed RNA polymerase II subunit RPB1 [Source:UniProtKB/Swiss-Prot;Acc:P08775]	transcript start<=circRNA start	transcript end>=circRNA end	-	52.4726	54.7648	54.9146	25.0008	0	24.9425	4	4	4	2	0	2
CBT15_circR_8187	-1.65999900445221	0.0435256	down	9	80092266	80111453	+	-	ENSMUSG00000034252	ENSMUST00000037484	ensembl_havana	Q6P7W0	215351	Senp6	SUMO/sentrin specific peptidase 6 [Source:MGI Symbol;Acc:MGI:1922075]	exon start=circRNA start	exon end=circRNA end	80092267-80092412 exon:ENSMUSE00001264444|80093537-80093641 exon:ENSMUSE00001272862|80103694-80103764 exon:ENSMUSE00001299509|80111311-80111453 exon:ENSMUSE00001284021	39.3545	27.3824	0	0	37.2604	24.9425	3	2	0	0	3	2
CBT15_circR_3745	-2.28375016478304	0.0499982	down	18	65644192	65656632	+	mm9_circ_012583:circbase	ENSMUSG00000042439	ENSMUST00000182852	havana	Q3TQ12	328977	Zfp532	zinc finger protein 532 [Source:MGI Symbol;Acc:MGI:3036282]	exon start=circRNA start	exon end=circRNA end	65644193-65644369 exon:ENSMUSE00001312874|65651560-65651722 exon:ENSMUSE00001297429|65656351-65656632 exon:ENSMUSE00001225933	26.2363	41.0736	96.1005	0	0	62.3562	2	3	7	0	0	5
CBT15_circR_2869	1.90305	0.0464603	up	15	95948271	95949956	+	-	ENSMUSG00000064210	ENSMUST00000071874	ensembl_havana	Q6P9J9	105722	Ano6	anoctamin 6	exon start=circRNA start	exon end=circRNA end	95948272-95948497 exon:ENSMUSE00000275040|95949491-95949660 exon:ENSMUSE00000275079|95949859-95949956 exon:ENSMUSE00000275072	0	27.3824	0	75.0023	49.6805	49.885	0	2	0	6	4	4
CBT15_circR_1579	-2.02473366516775	0.0455203	down	12	101665552	101709536	-	-	ENSMUSG00000021187	ENSMUST00000110047	havana	Q91XT6	74413	Tc2n	Tandem C2 domains nuclear protein [Source:UniProtKB/Swiss-Prot;Acc:Q91XT6]	exon start=circRNA start	exon end=circRNA end	101665553-101665744 exon:ENSMUSE00000115428|101678514-101678630 exon:ENSMUSE00000115430|101688960-101689060 exon:ENSMUSE00000115429|101689777-101689852 exon:ENSMUSE00000115425|101693115-101693206 exon:ENSMUSE00000115431|101694506-101694673 exon:ENSMUSE00000261355|101706383-101706613 exon:ENSMUSE00000261360|101709424-101709536 exon:ENSMUSE00000350165	52.4726	41.0736	0	0	49.6805	0	4	3	0	0	4	0
CBT15_circR_5201	-2.13458344324974	0.0466426	down	3	89230253	89230745	-	-	ENSMUSG00000042784	ENSMUST00000041142	ensembl_havana	Q02496	17829	Muc1	mucin 1, transmembrane [Source:MGI Symbol;Acc:MGI:97231]	transcript start<=circRNA start	transcript end>=circRNA end	-	0	68.456	41.1859	0	0	37.4137	0	5	3	0	0	3
CBT15_circR_8245	2.42627	0.0490536	up	JH584304.1	60369	60719	-	-	-	-	intergenic	-	-	-	-	-	-	-	131.182	0	68.6432	300.009	298.083	236.954	10	0	5	24	24	19
CBT15_circR_936	1.73281	0.0440292	up	10	94043301	94045633	+	-	ENSMUSG00000020021	ENSMUST00000020208	ensembl_havana	Q69ZL1	13998	Fgd6	FYVE, RhoGEF and PH domain-containing protein 6 [Source:UniProtKB/Swiss-Prot;Acc:Q69ZL1]	exon start=circRNA start	exon end=circRNA end	94043302-94045633 exon:ENSMUSE00000359814	0	0	0	37.5011	0	0	0	0	0	3	0	0
CBT15_circR_1319	1.73281	0.0440292	up	11	62117699	62132454	+	-	ENSMUSG00000042331	ENSMUST00000201364	havana	A0A0J9YUR2	432572	Specc1	sperm antigen with calponin homology and coiled-coil domains 1 [Source:MGI Symbol;Acc:MGI:2442356]	exon start=circRNA start	exon end=circRNA end	62117700-62119282 exon:ENSMUSE00000238537|62128200-62128407 exon:ENSMUSE00000238532|62131830-62131903 exon:ENSMUSE00000579220|62132276-62132454 exon:ENSMUSE00001359020	0	0	0	37.5011	0	0	0	0	0	3	0	0
CBT15_circR_3308	1.73281	0.0440292	up	17	35688538	35690180	-	-	ENSMUSG00000003534	ENSMUST00000003628	ensembl	Q05BN5	12305	Ddr1	Epithelial discoidin domain-containing receptor 1 [Source:UniProtKB/Swiss-Prot;Acc:Q03146]	exon start=circRNA start	exon end=circRNA end	35688539-35688690 exon:ENSMUSE00001299787|35688786-35688869 exon:ENSMUSE00001239035|35689667-35689913 exon:ENSMUSE00001245875|35689994-35690180 exon:ENSMUSE00001254759	0	0	0	37.5011	0	0	0	0	0	3	0	0
CBT15_circR_4954	1.73281	0.0440292	up	3	132743001	132774596	+	-	ENSMUSG00000028030	ENSMUST00000029664	ensembl_havana	Q8BM85	271981	Tbck	TBC1 domain containing kinase [Source:HGNC Symbol;Acc:HGNC:28261]	exon start=circRNA start	exon end=circRNA end	132743002-132743087 exon:ENSMUSE00001351224|132751187-132751223 exon:ENSMUSE00001349187|132752508-132752669 exon:ENSMUSE00001349162|132774421-132774596 exon:ENSMUSE00001351013	0	0	0	37.5011	0	0	0	0	0	3	0	0
CBT15_circR_5651	1.73281	0.0440292	up	4	48621510	48622024	+	-	ENSMUSG00000028347	ENSMUST00000030032	ensembl_havana	Q6PFE7	230157	Tmeff1	Mus musculus transmembrane protein with EGF-like and two follistatin-like domains 1 (Tmeff1), transcript variant 1, mRNA. [Source:RefSeq mRNA;Acc:NM_001356272]	transcript start<=circRNA start	transcript end>=circRNA end	-	0	0	0	37.5011	0	0	0	0	0	3	0	0
CBT15_circR_5766	1.73281	0.0440292	up	4	87840681	87841389	-	-	ENSMUSG00000028496	ENSMUST00000078090	ensembl_havana	A2AM29	70122	Mllt3	myeloid/lymphoid or mixed-lineage leukemia; translocated to, 3 [Source:MGI Symbol;Acc:MGI:1917372]	exon start=circRNA start	exon end=circRNA end	87840682-87841389 exon:ENSMUSE00001298032	0	0	0	37.5011	0	0	0	0	0	3	0	0
CBT15_circR_7270	1.73281	0.0440292	up	7	87360727	87376282	+	-	ENSMUSG00000030562	ENSMUST00000032781	ensembl_havana	B2RSM1	50490	Nox4	NADPH oxidase 4 [Source:MGI Symbol;Acc:MGI:1354184]	exon start=circRNA start	exon end=circRNA end	87360728-87360809 exon:ENSMUSE00001273622|87370018-87370137 exon:ENSMUSE00001272842|87371919-87372027 exon:ENSMUSE00001277168|87374354-87374422 exon:ENSMUSE00001229266|87376182-87376282 exon:ENSMUSE00001266311	0	0	0	37.5011	0	0	0	0	0	3	0	0
CBT15_circR_8318	1.73281	0.0440292	up	X	140677995	140693162	+	-	ENSMUSG00000000266	ENSMUST00000112988	havana	Q9QUS6	23947	Mid2	Mus musculus midline 2 (Mid2), transcript variant 2, mRNA. [Source:RefSeq mRNA;Acc:NM_001358366]	exon start=circRNA start	exon end!=circRNA end	-	0	0	0	37.5011	0	0	0	0	0	3	0	0
CBT15_circR_1837	1.4246	0.0485326	up	12	65158394	65162028	-	-	ENSMUSG00000047534	ENSMUST00000052201	ensembl_havana	Q80WQ8	217653	Mis18bp1	Mis18-binding protein 1 [Source:UniProtKB/Swiss-Prot;Acc:Q80WQ8]	exon start=circRNA start	exon end=circRNA end	65158395-65158861 exon:ENSMUSE00001226457|65161403-65162028 exon:ENSMUSE00001213212	0	0	0	25.0008	0	24.9425	0	0	0	2	0	2
CBT15_circR_4102	1.4246	0.0485326	up	19	5826057	5826634	+	-	ENSMUSG00000092274	ENSMUST00000173672	havana	-	66961	Neat1	nuclear paraspeckle assembly transcript 1 (non-protein coding)	transcript start<=circRNA start	transcript end>=circRNA end	-	0	0	0	25.0008	0	24.9425	0	0	0	2	0	2
CBT15_circR_4883	1.4246	0.0485326	up	3	103156039	103157821	+	-	ENSMUSG00000007379	ENSMUST00000172288	ensembl_havana	E9Q4E4	329727	Dennd2c	DENN domain containing 2C [Source:HGNC Symbol;Acc:HGNC:24748]	exon start=circRNA start	exon end=circRNA end	103156040-103156180 exon:ENSMUSE00001239266|103156802-103156950 exon:ENSMUSE00001267643|103157644-103157821 exon:ENSMUSE00001216671	0	0	0	25.0008	0	24.9425	0	0	0	2	0	2
CBT15_circR_3150	1.52673	0.0499562	up	16	93847287	93853217	+	-	ENSMUSG00000039456	ENSMUST00000201097	havana	F7BJB9	338467	Morc3	MORC family CW-type zinc finger protein 3 [Source:UniProtKB/Swiss-Prot;Acc:F7BJB9]	exon start=circRNA start	exon end=circRNA end	93847288-93847430 exon:ENSMUSE00001362920|93849130-93849277 exon:ENSMUSE00000555436|93853089-93853217 exon:ENSMUSE00000555430	0	0	0	37.5011	37.2604	0	0	0	0	3	3	0
CBT15_circR_3694	1.13294	0.0426806	up	18	56807663	56812075	-	-	ENSMUSG00000032656	ENSMUST00000102912	ensembl_havana	Q8BRX9	320253	March3	E3 ubiquitin-protein ligase MARCH3 [Source:UniProtKB/Swiss-Prot;Acc:Q8BRX9]	exon start=circRNA start	exon end=circRNA end	56807664-56807868 exon:ENSMUSE00000222217|56811832-56812075 exon:ENSMUSE00001307019	118.063	54.7648	205.93	237.507	434.704	249.425	9	4	15	19	35	20
