# Supplementary material for: Integrative Studies of Human Cord Blood Derived Mononuclear Cells and Umbilical Cord Derived Mesenchyme Stem Cells in Ameliorating Bronchopulmonary Dysplasia
Source: Front Cell Dev Biol. 2021 Nov 9;9:679866. doi: 10.3389/fcell.2021.679866 (PMC8631197; doi:10.3389/fcell.2021.679866)
Supplement: Supplementary file 5 [file Table_5.XLSX]

## Sheet: F_vs_GmRNA_GO_all_enrich
ONTOLOGY	ID	Description	GeneRatio	BgRatio	pvalue	p.adjust	qvalue	geneID	Count
BP	GO:0043087	regulation of GTPase activity	54/1856	297/21092	2.24194e-07	0.00129001	0.00108793	F11r/Ttc8/Gnas/Arhgap27/Tbc1d30/Sh3bp1/Ccl6/Rapgef3/Rapgef6/Tbc1d16/Plxnc1/Pkp4/Trappc6b/Tbc1d12/Map4k4/Sgsm1/Iqgap1/Wnt11/Rap1gap/Itga6/Dock10/Dock7/Wnt5a/Rsu1/Srgap2/Gpsm1/Ntf3/Tbc1d5/Rack1/Ccl25/Rasal3/Dab2ip/Epha4/Rgma/Plxna3/Prkg1/Rgl3/Arhgap24/Tbc1d9/Dock11/Sipa1l1/Ccl21a/Chn2/Rasgrp1/Ngef/Wnk1/Rasa1/Ect2/Syngap1/Arhgap42/Rapgef2/Ezh2/Icam1/Usp6nl	54
BP	GO:0070371	ERK1 and ERK2 cascade	59/1856	354/21092	1.31155e-06	0.00290496	0.0024499	Rps6ka6/Rps6ka6/Frs2/Cysltr2/Dusp3/Dab2/Nrxn1/Fn1/Agt/Zfp36l1/Trem2/Trem2/Tlr4/Npnt/Ccl6/Fgfr2/Clcf1/Clcf1/Rara/Ndrg2/Hmgcr/Ptpn1/Ednra/Fgf2/Trf/Timp3/Ptprc/Adam17/Fgfr3/Alkal1/Ccl25/Ager/Sirpa/Flcn/Dab2ip/Epha4/Pdgfra/Synj2bp/Alox15/Adra1a/Slamf1/Errfi1/Gcnt2/St5/Mst1r/Htr2a/Nrp1/Cd74/Cd44/Ccl21a/Abl2/Rasgrp1/Kit/C5ar1/Sema7a/Rapgef2/Icam1/Sema6a/Vrk3	59
BP	GO:0007059	chromosome segregation	54/1856	315/21092	1.51458e-06	0.00290496	0.0024499	Knl1/Nusap1/Terf1/Spice1/Anapc15/Atrx/Cep63/Nde1/Pds5b/Ncaph/Kif4/Ska3/Klhl22/Smc3/Dis3l2/Chmp6/Abraxas2/Ehmt2/Mki67/Vps4b/Ddx11/Csnk2a2/Bub1/Cenph/Anapc5/Syde1/Hnrnpu/Hnrnpu/Cenpc1/Axin2/Naa60/Pum1/Pum1/Cenpf/Anapc4/Stag2/Cenpw/Smc6/Sirt2/Rrs1/Rmi2/Map10/Nuf2/Rec8/Espl1/Actr3/Mcmbp/Akap8/Aurkb/Ect2/Cdc6/Cenpe/Hdac8/Mus81	54
BP	GO:0070372	regulation of ERK1 and ERK2 cascade	56/1856	336/21092	2.41611e-06	0.00295482	0.00249195	Rps6ka6/Rps6ka6/Frs2/Cysltr2/Dusp3/Dab2/Nrxn1/Fn1/Trem2/Trem2/Tlr4/Npnt/Ccl6/Fgfr2/Clcf1/Clcf1/Rara/Ndrg2/Hmgcr/Ptpn1/Ednra/Fgf2/Timp3/Ptprc/Adam17/Fgfr3/Alkal1/Ccl25/Ager/Sirpa/Flcn/Dab2ip/Epha4/Pdgfra/Synj2bp/Alox15/Adra1a/Slamf1/Errfi1/Gcnt2/St5/Mst1r/Htr2a/Nrp1/Cd74/Cd44/Ccl21a/Abl2/Rasgrp1/Kit/C5ar1/Sema7a/Rapgef2/Icam1/Sema6a/Vrk3	56
BP	GO:0043547	positive regulation of GTPase activity	41/1856	218/21092	2.56762e-06	0.00295482	0.00249195	F11r/Gnas/Arhgap27/Tbc1d30/Sh3bp1/Ccl6/Rapgef3/Rapgef6/Tbc1d16/Pkp4/Tbc1d12/Map4k4/Sgsm1/Wnt11/Rap1gap/Itga6/Dock10/Dock7/Wnt5a/Rsu1/Srgap2/Ntf3/Tbc1d5/Rack1/Ccl25/Rgma/Rgl3/Arhgap24/Tbc1d9/Dock11/Sipa1l1/Ccl21a/Chn2/Rasgrp1/Rasa1/Ect2/Arhgap42/Rapgef2/Ezh2/Icam1/Usp6nl	41
BP	GO:0045807	positive regulation of endocytosis	32/1856	157/21092	5.59036e-06	0.0046422	0.003915	Dab2/Magi2/Cd151/Snca/Pparg/Tor1a/Cbll1/Mib1/Pard3/Hspa8/Cd47/Rap1gap/Trf/Ptprc/Fcgr2b/Wnt5a/Hip1/Dll1/Ntf3/Tbc1d5/Mbl1/Ager/Actn4/Sirpa/Synj2bp/Ldlr/Plcg2/Clu/Bcl2l1/Serpine1/Tnf/Sgip1	32
BP	GO:0120031	plasma membrane bounded cell projection assembly	73/1856	493/21092	7.13298e-06	0.0046422	0.003915	Cyfip1/Cep70/Sh2b1/Iqcb1/Ablim2/Ttc8/Itprip/Nrxn1/Tbc1d30/Cfap157/Ablim1/Ttll5/Sh3bp1/Ppp1r9a/Plekhm1/Tapt1/Sept2/Sept2/Stk36/C2cd3/Rapgef6/Disc1/Bbip1/Nck1/Prkcq/Eps8l1/Tctn3/Intu/Intu/Stau2/Anln/Pfn1/Parva/Myo10/Spata6/Ccdc114/Cdk10/Pxn/Rap1gap/Itga6/E2f4/Ccdc113/Nphp3/Srgap2/Ift88/Evl/Cfap20/Dnaic1/B9d2/Syne2/Arhgap24/P2rx7/Nrp1/Sept3/Eps8l2/Poc1b/Dock11/Dnm3/Emp1/Abl2/Actr3/Kit/Fam161a/Cdc42e…	73
BP	GO:2001234	negative regulation of apoptotic signaling pathway	41/1856	227/21092	7.28608e-06	0.0046422	0.003915	Mkl1/Vnn1/Sgms1/Gpx1/Nr4a2/Dab2/Tmbim6/Itprip/Tnfrsf22/Mpv17l/Rb1cc1/Eya1/Cep63/Bdkrb2/Phip/Ptpn1/Parl/Itga6/Tmem161a/March7/Sh3glb1/Psen2/Psen1/G2e3/Zmynd11/Pcgf2/Bcl2l2/Nrp1/Trim32/Cd74/Cd44/Ybx3/Clu/Bcl2l1/Serpine1/Zfp385a/Hyou1/Higd1a/Tnf/Icam1/Sgk3	41
BP	GO:0033044	regulation of chromosome organization	56/1856	349/21092	7.84288e-06	0.0046422	0.003915	Atad2/Atad2/Jarid2/Kdm4a/Map1s/Kdm5a/Terf1/Ctc1/Uty/Paf1/Snca/Gata3/Anapc15/Atrx/Slk/Trip12/Prkcq/Klhl22/Dnmt1/Daxx/Gnl3/Ehmt2/Mki67/Ddx11/Bub1/Rnf40/Suv39h1/Anapc5/Pax5/Senp6/Hnrnpu/Hnrnpu/Axin2/Flcn/Ctbp1/Mier1/Setd5/Anapc4/Kdm2a/Kdm4b/Rmi2/Smg6/Smg1/Setd1a/Mapkapk5/Rtel1/Ylpm1/Men1/Men1/Rnf20/Cenpv/Akap8/Aurkb/Cdc6/Cenpe/Hdac8	56
BP	GO:0031331	positive regulation of cellular catabolic process	55/1856	341/21092	8.06779e-06	0.0046422	0.003915	Clec16a/Cnot8/Zbtb20/Dab2/Git1/Zc3h12d/Snca/Zfp36l1/Fabp1/Nop53/Vps13c/Disc1/Atpif1/Il33/Rufy4/Nanos1/Ptpn1/Csnk1a1/Hspa1a/Supv3l1/Mtdh/Rnf40/Gck/Irgm2/Sh3glb1/Adam8/Psen2/Gpsm1/Gtpbp1/Rack1/Fbxl5/Ager/Psen1/Flcn/Dab2ip/Trp53inp2/Trib3/Pum1/Pum1/Sumo3/Rgma/Bcl2l11/Ldlr/Usp13/Hspa1b/Rnf144a/Sirt2/P2rx7/Htr2a/Trim67/Clu/Rchy1/Fbxo7/Tbk1/Tnf	55
BP	GO:0016570	histone modification	64/1856	423/21092	1.29342e-05	0.00640427	0.00540103	Jarid2/Kdm4a/Phc1/Kdm5a/Tcf3/Skp1a/Paf1/Snca/Gata3/Hdac10/Kdm5d/Eya1/Atrx/Slk/Jade1/Usp49/Ash2l/Leo1/Trip12/Hdac7/Dnmt1/Daxx/Ehmt2/Kmt2c/Kdm5c/Rnf40/Suv39h1/Kat8/Yeats2/Kat6a/Kmt5b/Pax5/Ing3/Naa60/Hcfc1/Flcn/Ctbp1/Mier1/Prmt8/Setd5/Ppm1f/Mbd3/Kdm2a/Pcgf2/Kdm4b/Prmt1/Sirt2/Msl1/Jade2/Epc1/Setd1a/Kmt5c/Pcgf1/Ldb1/Men1/Men1/Rnf20/Akap8/Aurkb/Msl3/Nek11/Ezh2/Hdac8/Trrap	64
BP	GO:0044770	cell cycle phase transition	60/1856	390/21092	1.43092e-05	0.00640427	0.00540103	Abcb1a/Rint1/Eif4g1/Fhl1/Terf1/Babam2/Tcf3/Ctc1/Zc3h12d/Adamts1/Paf1/Zfp36l1/Anapc15/Dgkz/Mepce/Rad17/Jade1/Nop53/Klf11/Lats2/Rptor/Prkcq/Klhl22/Ccnd3/Dtl/Hyal1/Vps4b/Cdkn1a/Camk2g/Ptprc/Fbxl12/Lmnb1/Bub1/Nacc2/E2f4/Taf2/Rbm38/Anapc5/Cenpf/Arpp19/Nfatc1/Anapc4/Dbf4/Ercc3/Stxbp4/Skp2/Skp2/Acvr1b/Men1/Men1/Tcf19/Akap8/Aurkb/E2f6/Fbxo7/Cdc6/Nek11/Cenpe/Ezh2/Cradd	60
BP	GO:0016569	covalent chromatin modification	65/1856	434/21092	1.54443e-05	0.00640427	0.00540103	Jarid2/Kdm4a/Phc1/Kdm5a/Tcf3/Skp1a/Paf1/Snca/Gata3/Hdac10/Kdm5d/Eya1/Atrx/Slk/Jade1/Usp49/Ash2l/Leo1/Trip12/Hdac7/Dnmt1/Daxx/Ehmt2/Kmt2c/Kdm5c/Chd1/Rnf40/Suv39h1/Kat8/Yeats2/Kat6a/Kmt5b/Pax5/Ing3/Naa60/Hcfc1/Flcn/Ctbp1/Mier1/Prmt8/Setd5/Ppm1f/Mbd3/Kdm2a/Pcgf2/Kdm4b/Prmt1/Sirt2/Msl1/Jade2/Epc1/Setd1a/Kmt5c/Pcgf1/Ldb1/Men1/Men1/Rnf20/Akap8/Aurkb/Msl3/Nek11/Ezh2/Hdac8/Trrap	65
BP	GO:0098813	nuclear chromosome segregation	44/1856	258/21092	1.55822e-05	0.00640427	0.00540103	Knl1/Nusap1/Terf1/Spice1/Anapc15/Atrx/Cep63/Pds5b/Ncaph/Kif4/Klhl22/Smc3/Dis3l2/Chmp6/Abraxas2/Ehmt2/Vps4b/Ddx11/Bub1/Anapc5/Syde1/Hnrnpu/Hnrnpu/Cenpc1/Axin2/Cenpf/Anapc4/Stag2/Sirt2/Rrs1/Rmi2/Map10/Nuf2/Rec8/Espl1/Actr3/Mcmbp/Akap8/Aurkb/Ect2/Cdc6/Cenpe/Hdac8/Mus81	44
BP	GO:0033674	positive regulation of kinase activity	68/1856	467/21092	2.51626e-05	0.00965237	0.00814032	Frs2/Jtb/Itga1/Dab2/Tcf3/Nrxn1/Agt/Snca/Tlr4/Dgkz/Ppp1r9a/Slk/Mdfic/Kras/Rptor/Daxx/Adnp/Lpar2/Map4k4/Iqgap1/Ccnd3/Ptpn1/Pxn/Cdkn1a/Fgf2/Zfp91/Trf/Ptprc/Wnt5a/Atg13/Adam17/Irgm2/Rassf2/Fgfr3/Sh3glb1/Adam8/Ntf3/Axin2/Ager/Psen1/Dab2ip/Epha4/Pdgfra/Adra1a/Map3k14/Malt1/Mst1r/Pfkfb1/Irak1/P2rx7/Ace/Pla2g1b/Htr2a/Mlkl/Zfp622/Cd74/Cd44/Clu/Rasgrp1/Stk25/Kit/Ect2/Cdc6/Higd1a/Rapgef2/Tnf/Cenpe/Ezh2	68
BP	GO:0045926	negative regulation of growth	46/1856	281/21092	2.94811e-05	0.0106022	0.00894132	Apbb2/Jarid2/Gnas/Fhl1/Idh3g/Dab2/Bbc3/Zc3h12d/Agt/Ppara/Hyal2/Sema4c/Arhgap4/Pparg/Bcl11a/Smarca2/Sema6d/Tbx5/Wnt11/Hyal1/Cdkn1a/Wnt5a/Fgfr3/Fgf13/Cited2/Mbl1/Rack1/Tcf7l2/Flcn/Dab2ip/Foxp1/Rgma/Plxna3/Rbbp7/Atxn2/Nrp1/Acvr1b/Ptprs/Men1/Men1/Actr3/Cryab/Sema7a/Tnf/Sema6a/Dnajc2	46
BP	GO:0010498	proteasomal protein catabolic process	64/1856	436/21092	3.35904e-05	0.0110091	0.00928451	Clec16a/Uggt2/Gpx1/Dab2/Pkd1/Skp1a/Arntl/Tmem129/Nop53/Rpl11/Tor1a/Klhl22/Tmub1/Lrrc29/Il33/Siah1a/Fbxw5/Usp14/Csnk1a1/Stt3b/Hspa1a/Man1b1/Fbxl12/Rnf40/Psmd4/March7/Plaa/Psen2/Anapc5/Keap1/Rack1/Fbxl5/Psen1/Senp1/Dab2ip/Psmd14/Trib3/Amn1/Fbxl2/Anapc4/Rnf103/Ubr3/Usp13/Ubr1/Derl2/Hspa1b/Rnf144a/Rnf5/Sirt2/Skp2/Skp2/Ube2d3/Fbxl3/Nhlrc3/Erlin1/Cdc34/Clu/Rchy1/Maea/Dmac2/Psmf1/Map1a/Ube3a/Topors	64
BP	GO:0034329	cell junction assembly	36/1856	202/21092	3.44393e-05	0.0110091	0.00928451	Dusp3/Fn1/Agt/Ramp2/Sh3bp1/Lsr/Slk/Ikbkb/Pkp4/Hdac7/Dlc1/Map4k4/Limch1/Iqgap1/Camsap3/Wnt11/Macf1/Dst/Pard3/Pxn/Sorbs1/Actn4/Flcn/Ppm1f/Epb41l3/Rab13/Ctnnd1/Ctnnd1/Ace/Nrp1/Gjc1/Ldb1/Ect2/Myo1c/Rapgef2/Tnf	36
BP	GO:2001233	regulation of apoptotic signaling pathway	61/1856	411/21092	3.66094e-05	0.0110869	0.0093501	Mkl1/Vnn1/S100a8/Sgms1/Gpx1/Nr4a2/Dab2/Tmbim6/Bbc3/Itprip/Tnfrsf22/Agt/Hyal2/Mpv17l/Rb1cc1/Eya1/Cep63/Bdkrb2/Rpl11/Phip/Nck1/Daxx/Atpif1/Siah1a/Ptpn1/Parl/Itga6/Timp3/Ptprc/Tmem161a/Bub1/Nacc2/March7/Sh3glb1/Psen2/Rack1/Psen1/Flcn/Dab2ip/Htra2/G2e3/Bcl2l11/Zmynd11/Pcgf2/Bcl2l2/Nrp1/Trim32/Eif2ak3/Cd74/Cd44/Ybx3/Clu/Bcl2l1/Serpine1/Zfp385a/Hyou1/Higd1a/Tnf/Icam1/Cradd/Sgk3	61
BP	GO:0051983	regulation of chromosome segregation	23/1856	106/21092	3.99007e-05	0.0114794	0.00968117	Terf1/Anapc15/Atrx/Klhl22/Mki67/Ddx11/Csnk2a2/Bub1/Anapc5/Hnrnpu/Hnrnpu/Axin2/Pum1/Pum1/Anapc4/Smc6/Sirt2/Rmi2/Aurkb/Ect2/Cdc6/Cenpe/Hdac8	23
BP	GO:0045862	positive regulation of proteolysis	51/1856	327/21092	4.24219e-05	0.0116236	0.00980276	S100a8/Dab2/Aurkaip1/Bbc3/Snca/Ifi27/Antxr1/Nop53/Slc11a2/Disc1/Pparg/Dlc1/Efna3/Atpif1/Il33/Casp8ap2/Csnk1a1/Hspa1a/Hspa8/Rnf40/Hip1/Adam8/Psen2/Ist1/Rack1/Psen1/Senp1/Dab2ip/Epha4/Trib3/Htra2/Sumo3/Ppm1f/Rgma/Bcl2l11/Usp13/Hspa1b/Rnf144a/Sirt2/Ctnnd1/Ctnnd1/Trim67/Trim32/Eif2ak3/Clu/Men1/Men1/Ccbe1/Rchy1/Tnf/Cradd	51
BP	GO:0000819	sister chromatid segregation	33/1856	182/21092	5.04176e-05	0.0127993	0.0107943	Nusap1/Terf1/Anapc15/Atrx/Pds5b/Ncaph/Kif4/Klhl22/Smc3/Dis3l2/Chmp6/Vps4b/Ddx11/Bub1/Anapc5/Hnrnpu/Hnrnpu/Cenpc1/Axin2/Anapc4/Stag2/Rrs1/Rmi2/Map10/Nuf2/Rec8/Espl1/Mcmbp/Akap8/Aurkb/Cdc6/Cenpe/Hdac8	33
BP	GO:0009896	positive regulation of catabolic process	60/1856	407/21092	5.14807e-05	0.0127993	0.0107943	Nsf/Clec16a/Cnot8/Zbtb20/Dab2/Git1/Zc3h12d/Snca/Zfp36l1/Fabp1/Nop53/Vps13c/Disc1/Atpif1/Idua/Il33/Rufy4/Nanos1/Ptpn1/Dtl/Csnk1a1/Hspa1a/Supv3l1/Mtdh/Rnf40/Wnt5a/Gck/Irgm2/Sh3glb1/Adam8/Psen2/Gpsm1/Gtpbp1/Rack1/Fbxl5/Ager/Psen1/Flcn/Dab2ip/Trp53inp2/Trib3/Pum1/Pum1/Sumo3/Rgma/Bcl2l11/Ldlr/Usp13/Hspa1b/Rnf144a/Sirt2/P2rx7/Htr2a/Trim67/Trim32/Clu/Rchy1/Fbxo7/Tbk1/Tnf	60
BP	GO:1901136	carbohydrate derivative catabolic process	24/1856	115/21092	5.33859e-05	0.0127993	0.0107943	Renbp/Gusb/Lyve1/Hyal2/Ctbs/Nt5m/Enpp4/Idua/Hyal1/Stt3b/Fgf2/Man1b1/Gnpda2/Nudt16/Nt5e/Neu3/Gns/Ada/Nudt9/Neu1/Fuca1/Chil3/Naga/Cd44	24
BP	GO:1903362	regulation of cellular protein catabolic process	39/1856	233/21092	7.0409e-05	0.0158903	0.0134011	Clec16a/Gpx1/Dab2/Pkd1/Nop53/Disc1/Rpl11/Atpif1/Il33/Usp14/Csnk1a1/Hspa1a/Atp13a2/Csnk2a2/Rnf40/March7/Psen2/Rack1/Fbxl5/Psen1/Senp1/Dab2ip/Psmd14/Epha4/Trib3/Sumo3/Ldlr/Usp13/Derl2/Hspa1b/Rnf144a/Sirt2/Trim67/Clu/Rchy1/Psmf1/Map1a/Laptm4b/Ube3a	39
BP	GO:1903050	regulation of proteolysis involved in cellular protein catabolic process	35/1856	201/21092	7.18019e-05	0.0158903	0.0134011	Clec16a/Gpx1/Dab2/Pkd1/Nop53/Disc1/Rpl11/Atpif1/Il33/Usp14/Csnk1a1/Hspa1a/Csnk2a2/Rnf40/March7/Psen2/Rack1/Psen1/Senp1/Dab2ip/Psmd14/Epha4/Trib3/Sumo3/Usp13/Derl2/Hspa1b/Rnf144a/Sirt2/Trim67/Clu/Rchy1/Psmf1/Map1a/Ube3a	35
BP	GO:0044772	mitotic cell cycle phase transition	53/1856	352/21092	7.89006e-05	0.0168146	0.0141806	Abcb1a/Rint1/Eif4g1/Fhl1/Terf1/Tcf3/Ctc1/Zc3h12d/Adamts1/Zfp36l1/Anapc15/Dgkz/Mepce/Rad17/Jade1/Nop53/Klf11/Lats2/Rptor/Prkcq/Klhl22/Ccnd3/Dtl/Hyal1/Vps4b/Cdkn1a/Camk2g/Fbxl12/Lmnb1/Bub1/Nacc2/E2f4/Taf2/Rbm38/Anapc5/Cenpf/Arpp19/Nfatc1/Anapc4/Dbf4/Ercc3/Skp2/Skp2/Acvr1b/Tcf19/Aurkb/E2f6/Fbxo7/Cdc6/Nek11/Cenpe/Ezh2/Cradd	53
BP	GO:2001242	regulation of intrinsic apoptotic signaling pathway	31/1856	171/21092	8.42603e-05	0.0173155	0.014603	Vnn1/S100a8/Gpx1/Tmbim6/Bbc3/Cep63/Bdkrb2/Rpl11/Nck1/Siah1a/Ptpn1/Parl/Tmem161a/Bub1/Nacc2/March7/Sh3glb1/Rack1/Flcn/G2e3/Bcl2l11/Bcl2l2/Trim32/Eif2ak3/Cd74/Cd44/Ybx3/Clu/Bcl2l1/Zfp385a/Hyou1	31
BP	GO:0046578	regulation of Ras protein signal transduction	37/1856	220/21092	9.63006e-05	0.0181252	0.0152859	Dennd4b/Prex2/Rgl2/Git1/Ralgps1/Dgkz/Kras/Itga3/Eps8l1/Lpar2/Dlc1/Map4k4/Cyth4/Rasal3/Flcn/Arhgef25/Arhgef28/Dab2ip/Prag1/Arpp19/Adra1a/Arhgap24/Adgrg1/Nrp1/P2ry10/Trim67/Eps8l2/Plekhg3/Itsn2/Abl2/Rasgrp1/Ngef/Ect2/Syngap1/Arhgap42/Arhgef2/F2rl2	37
BP	GO:0030308	negative regulation of cell growth	34/1856	196/21092	9.76468e-05	0.0181252	0.0152859	Apbb2/Fhl1/Dab2/Bbc3/Zc3h12d/Agt/Ppara/Hyal2/Sema4c/Arhgap4/Pparg/Bcl11a/Smarca2/Sema6d/Wnt11/Hyal1/Cdkn1a/Wnt5a/Fgf13/Rack1/Flcn/Dab2ip/Foxp1/Rgma/Plxna3/Rbbp7/Nrp1/Acvr1b/Ptprs/Actr3/Cryab/Sema7a/Sema6a/Dnajc2	34
BP	GO:0031345	negative regulation of cell projection organization	35/1856	204/21092	9.76504e-05	0.0181252	0.0152859	Dab2/Nrxn1/Tbc1d30/Sema4c/Arhgap4/Itga3/Bcl11a/Map4k4/Sema6d/Cdk10/Prkcsh/Rap1gap/Wnt5a/Adam17/Fgf13/Il15ra/Psen1/Evl/Zfp365/Prag1/Epha4/Rgma/Plxna3/Xylt1/Arhgap24/Nrp1/Dnm3/Ptprs/Actr3/Ngef/Syngap1/Sema7a/Rapgef2/Ube3a/Sema6a	35
BP	GO:0007015	actin filament organization	58/1856	399/21092	0.000100847	0.0181336	0.015293	Eln/Cyfip1/Ttc8/Bcar1/Cap1/Fchsd2/Limk1/Sh3bp1/Ppp1r9a/Rapgef3/Shank3/Nck1/Prkcq/Dlc1/Akap2/Diaph3/Limch1/Sptbn1/Pfn1/Wnt11/Shroom2/Washc3/Pxn/Sorbs1/Trf/Rflnb/Ttc17/Fat1/Kirrel/Gdpd2/Kptn/Hip1/Tmod4/Actn4/Evl/Sirpa/Zyx/Gmfg/Alox15/Ppm1f/Gmfb/Ttn/Mad2l2/Coro7/Nrp1/Phactr1/Abi2/Mical1/Abl2/Kank3/Actr3/Rasa1/Cdc42ep4/Arhgef2/Sorbs2/Myo1c/Coro1a/Icam1	58
BP	GO:0001819	positive regulation of cytokine production	62/1856	435/21092	0.000104934	0.0182966	0.0154304	Cd34/Lpl/Polr3b/Il1rl2/Cd300c2/Zbtb20/Nr4a3/Agt/H2-T23/Tlr4/Gata3/Hyal2/Cd200/Nop53/Clec9a/Rara/Prkcq/Sptbn1/Mmp8/Wnt11/Il20rb/Il33/Tbc1d23/Fam49b/Ncl/H2-Q7/Ptprc/Runx1/Polr3f/Wnt5a/Adam17/Zfp64/Tlr3/Spon2/Adam8/Spn/Ager/Pum1/Pum1/Slamf1/Malt1/Chuk/Plcg2/Dhx58/Irak1/P2rx7/Trim32/Eif2ak3/Cd74/Clu/Abl2/Rasgrp1/Ccbe1/Gbp5/Serpine1/C5ar1/Arhgef2/Sema7a/Gpsm3/Tbk1/Tnf/Sec14l1	62
BP	GO:0007264	small GTPase mediated signal transduction	66/1856	472/21092	0.000113398	0.0186319	0.0157132	Cyfip1/Dennd4b/Prex2/Rgl2/Git1/Ralgps1/Sh3bp1/Dgkz/Rapgef3/Kras/Itga3/Rab33b/Eps8l1/Dnmt1/Lpar2/Dlc1/Map4k4/Ednra/Cyth4/Rap1gap/Dock10/Dock7/Rabl3/Rsu1/Rasal3/Flcn/Arhgef25/Arhgef28/Dab2ip/Prag1/Arpp19/Synj2bp/Adra1a/G3bp2/Arhgef11/Rab13/Rab3c/Chuk/Rgl3/Arhgap24/Rab24/Adgrg1/Nrp1/P2ry10/Trim67/Mapkapk5/Eps8l2/Dock11/Plekhg3/Abi2/Sipa1l1/Itsn2/Abl2/Rasgrp1/Ngef/Cdc42ep4/Ect2/Syngap1/Arhgap42/Arhge…	66
BP	GO:0032102	negative regulation of response to external stimulus	49/1856	323/21092	0.000119642	0.0186319	0.0157132	Cd34/Tspan8/Mmp28/Nfkb1/Dusp3/Gpx1/Nrxn1/Spink5/Ppara/Arg2/Gata3/Sema4c/Cd200/Pparg/Il1r2/Sema6d/Il20rb/Hmgcr/Cnr2/Calcrl/Cacnb3/Fgf2/Fcgr2b/Wnt5a/Prdm1/Nt5e/Spn/Ager/Sirpa/Epha4/Pdgfra/Rgma/Ada/Serping1/Plxna3/Xylt1/Ldlr/Mill2/Prkg1/Sirt2/Dhx58/Nrp1/Ptprs/Cd44/Serpine1/Sema7a/Chd8/Sec14l1/Sema6a	49
BP	GO:1902275	regulation of chromatin organization	33/1856	190/21092	0.000119752	0.0186319	0.0157132	Atad2/Atad2/Jarid2/Kdm4a/Map1s/Kdm5a/Uty/Paf1/Snca/Gata3/Atrx/Slk/Trip12/Dnmt1/Daxx/Ehmt2/Mki67/Rnf40/Suv39h1/Pax5/Hnrnpu/Hnrnpu/Flcn/Ctbp1/Mier1/Setd5/Kdm2a/Kdm4b/Setd1a/Men1/Men1/Rnf20/Akap8	33
BP	GO:0043112	receptor metabolic process	34/1856	198/21092	0.000119809	0.0186319	0.0157132	Nsf/Plekhj1/Dab2/Hoxa5/Git1/Magi2/Ramp2/Snca/Ppara/Tbc1d16/Pparg/Gria3/Ptpn1/Calcrl/Pard3/Sh3gl2/Akap5/Sh3glb1/Mkln1/Psen2/Ntf3/Tbc1d5/Psen1/Nsg1/Synj2bp/Fut8/Plcg2/Rep15/Sirt2/Atxn2/Ap2b1/Dnm3/Kif16b/Tnf	34
BP	GO:0006979	response to oxidative stress	58/1856	402/21092	0.000123923	0.0187646	0.0158251	Vnn1/Rbpms/Nfkb1/Gpx1/Nr4a2/Nr4a3/Bcar1/Snca/Tlr4/Arntl/Hyal2/Fabp1/Mtf1/Cygb/Slc11a2/Glrx2/Coq7/Tor1a/Ncoa7/Prdx1/Mpv17/Srxn1/Hyal1/Ucp2/Camk2g/Atp13a2/Tmem161a/Fancc/Abcc1/Atp2a2/Rack1/Psen1/Mgst1/Mtr/Foxp1/Htra2/Pdgfra/Txnip/Ercc3/Mmp2/Akr1b3/Fut8/Chuk/Pcgf2/Mill2/Gsr/Sirt2/Hmox2/Zfp622/Nqo1/Cryab/Stk25/Fbxo7/Acox2/Ect2/Ppp1r15b/Tnf/Ezh2	58
BP	GO:0051099	positive regulation of binding	35/1856	207/21092	0.000131618	0.0189631	0.0159925	Eif4g1/Nmd3/Pkd1/Mef2c/Tlr4/Gata3/Rapgef3/Pparg/Rpl11/Rara/Epb41/Mmp8/Spag8/Fkbp1a/Hspa4/Ddx11/Ctbp2/Wnt5a/Parp9/Stpg1/Gpsm1/Tcf7l2/Psen1/Epha4/Trib3/Sppl3/Sirt2/Ace/Eif2ak3/Abl2/Men1/Men1/Actr3/Rapgef2/Hdac8	35
BP	GO:0045860	positive regulation of protein kinase activity	61/1856	430/21092	0.000135618	0.0189631	0.0159925	Frs2/Jtb/Itga1/Dab2/Tcf3/Nrxn1/Agt/Snca/Tlr4/Ppp1r9a/Slk/Mdfic/Kras/Rptor/Daxx/Adnp/Lpar2/Map4k4/Iqgap1/Ccnd3/Ptpn1/Pxn/Cdkn1a/Fgf2/Zfp91/Trf/Ptprc/Wnt5a/Atg13/Adam17/Irgm2/Rassf2/Adam8/Ntf3/Axin2/Ager/Psen1/Dab2ip/Epha4/Adra1a/Map3k14/Malt1/Mst1r/Irak1/P2rx7/Ace/Pla2g1b/Htr2a/Mlkl/Cd74/Clu/Rasgrp1/Stk25/Kit/Ect2/Cdc6/Higd1a/Rapgef2/Tnf/Cenpe/Ezh2	61
BP	GO:0010771	negative regulation of cell morphogenesis involved in differentiation	21/1856	100/21092	0.00013921	0.0189631	0.0159925	Bcar1/Sema4c/Arhgap4/Bcl11a/Sema6d/Wnt5a/Fgf13/Actn4/Psen1/Rgma/Plxna3/Nrp1/Dnm3/Ptprs/Actr3/Ngef/Syngap1/Sema7a/Rapgef2/Ube3a/Sema6a	21
BP	GO:0051098	regulation of binding	57/1856	395/21092	0.000140459	0.0189631	0.0159925	Runx1t1/Eif4g1/Nmd3/Dab2/Tmbim6/Pkd1/Mef2c/Ppara/Tlr4/Gata3/Mepce/Rapgef3/Disc1/Pparg/Rpl11/Rara/Epb41/Adnp/Aes/Mmp8/Spag8/Fkbp1a/Csnk1a1/Sympk/Rap1gap/Hspa4/Ddx11/Ctbp2/Wnt5a/Parp9/Stpg1/Psen2/Gpsm1/Tcf7l2/Ager/Psen1/Dab2ip/Tdg/Epha4/Trib3/Sumo3/Rgma/Mark2/Ercc3/Sppl3/Aplp2/Sirt2/Mad2l2/Ace/Eif2ak3/Abl2/Men1/Men1/Actr3/Aurkb/Rapgef2/Hdac8	57
BP	GO:0030100	regulation of endocytosis	43/1856	274/21092	0.000141712	0.0189631	0.0159925	Nsf/Dab2/Magi2/Cd151/Snca/Pparg/Tor1a/Cbll1/Ptpn1/Mib1/Pard3/Hspa8/Cd47/Rap1gap/Trf/Ptprc/Fcgr2b/Wnt5a/Sh3gl2/Akap5/Ston1/Hip1/Mkln1/Dll1/Ntf3/Tbc1d5/Mbl1/Rack1/Ager/Actn4/Sirpa/Synj2bp/Alox15/Ldlr/Plcg2/Sirt2/Atxn2/Clu/Bcl2l1/Serpine1/Syt7/Tnf/Sgip1	43
BP	GO:0001558	regulation of cell growth	62/1856	441/21092	0.000154827	0.0200441	0.0169042	Cyfip1/Apbb2/Eif4g1/Fhl1/Parp2/Dab2/Ncoa3/Bbc3/Zc3h12d/Fn1/Agt/Limk1/Ppara/Hyal2/Sema4c/Disc1/Arhgap4/Pparg/Bcl11a/Rptor/Klhl22/Adnp/Smarca2/Nol12/Sema6d/Wnt11/Nanos1/Hyal1/Cdkn1a/Supv3l1/Wnt5a/Adam17/Fgf13/Sh3glb1/Plaa/Ist1/Mgll/Rack1/Exosc4/Flcn/Dab2ip/Foxp1/Rgma/Epb41l3/Plxna3/Rbbp7/Derl2/Eif2b2/Mad2l2/Syt17/Nrp1/Acvr1b/Extl3/Trim32/Ptprs/Cd44/Itsn2/Actr3/Cryab/Sema7a/Sema6a/Dnajc2	62
BP	GO:0036465	synaptic vesicle recycling	17/1856	73/21092	0.000158277	0.0200441	0.0169042	Cyfip1/Actg1/Snca/Tor1a/Fcho2/A830010M20Rik/Sh3gl2/Plaa/Nlgn2/Ap1s2/Syt17/Dnm3/Bcl2l1/Ap3b1/Rab3a/Rab3a/Syt7	17
BP	GO:0072089	stem cell proliferation	26/1856	138/21092	0.000160241	0.0200441	0.0169042	Abcb1a/Cd34/Frs2/Ncoa3/Ctc1/Zfp36l1/Nde1/Fgfr2/Disc1/Lrp6/Nfya/Nfya/Ptprc/Dock7/Wnt5a/Fgf13/Ago3/Eml1/Hnrnpu/Hnrnpu/Aspm/Nfatc1/Ace/Mpl/Setd1a/Arhgef2	26
BP	GO:0140014	mitotic nuclear division	43/1856	276/21092	0.000167176	0.0202213	0.0170536	Sh2b1/Kif11/Kif11/Nusap1/Terf1/Spice1/Anapc15/Atrx/Nde1/Pds5b/Ncaph/Fgfr2/Kif4/Phip/Klhl22/Smc3/Dis3l2/Chmp6/Ccnd3/Abraxas2/Mki67/Fbxw5/Vps4b/Hspa1a/Bub1/Fgfr3/Anapc5/Hnrnpu/Hnrnpu/Cenpc1/Anapc4/Stag2/Hspa1b/Rrs1/Map10/Ccnjl/Nuf2/Espl1/Akap8/Aurkb/Cdc6/Tnf/Cenpe	43
BP	GO:0051056	regulation of small GTPase mediated signal transduction	40/1856	251/21092	0.000170812	0.0202213	0.0170536	Dennd4b/Prex2/Rgl2/Git1/Ralgps1/Sh3bp1/Dgkz/Kras/Itga3/Eps8l1/Lpar2/Dlc1/Map4k4/Cyth4/Rap1gap/Rasal3/Flcn/Arhgef25/Arhgef28/Dab2ip/Prag1/Arpp19/Adra1a/Arhgap24/Adgrg1/Nrp1/P2ry10/Trim67/Eps8l2/Plekhg3/Sipa1l1/Itsn2/Abl2/Rasgrp1/Ngef/Ect2/Syngap1/Arhgap42/Arhgef2/F2rl2	40
BP	GO:1902850	microtubule cytoskeleton organization involved in mitosis	25/1856	131/21092	0.0001722	0.0202213	0.0170536	Kif11/Kif11/Nusap1/Spice1/Pkd1/Eya1/Nde1/Kif4/Smc3/Abraxas2/Vps4b/Hspa1a/Eml1/Hnrnpu/Hnrnpu/Parp3/Wdr62/Stag2/Cenpa/Hspa1b/Map10/Nuf2/Aurkb/Arhgef2/Cenpe	25
BP	GO:0048640	negative regulation of developmental growth	24/1856	124/21092	0.000184048	0.0208607	0.0175929	Jarid2/Gnas/Ppara/Sema4c/Arhgap4/Bcl11a/Sema6d/Tbx5/Wnt5a/Fgfr3/Fgf13/Cited2/Tcf7l2/Foxp1/Rgma/Plxna3/Atxn2/Nrp1/Ptprs/Men1/Men1/Actr3/Sema7a/Sema6a	24
BP	GO:0031346	positive regulation of cell projection organization	64/1856	462/21092	0.000186678	0.0208607	0.0175929	Cyfip1/Magi2/Fn1/Adamts1/Agt/Limk1/Ppp1r9a/Plekhm1/Tapt1/Disc1/Plxnc1/Itga3/Bcl11a/Ikbkb/Shank3/Nck1/Prkcq/Eps8l1/Lrp6/Adnp/Stau2/Iqgap1/Anln/Pfn1/Kif3c/Mob2/Retreg3/Trak1/Wnt5a/Adam17/Akap5/Alkal1/Sh3glb1/Plaa/Ist1/Cux1/Psen1/Dab2ip/Epha4/Rgma/Mark2/Plxna3/Neu1/Nlgn2/Eif2b2/Fkbp1b/P2rx7/Syt17/Nrp1/Trim67/Mapkapk5/Eps8l2/Dock11/Dnm3/Itsn2/Abl2/Actr3/Stk25/Kit/Cdc42ep4/Sema7a/Rapgef2/Ezh2/Cenpj	64
BP	GO:0043161	proteasome-mediated ubiquitin-dependent protein catabolic process	54/1856	373/21092	0.000191009	0.0208607	0.0175929	Clec16a/Dab2/Skp1a/Arntl/Tmem129/Nop53/Rpl11/Klhl22/Tmub1/Lrrc29/Il33/Siah1a/Fbxw5/Usp14/Csnk1a1/Stt3b/Hspa1a/Man1b1/Fbxl12/Psmd4/Plaa/Psen2/Anapc5/Rack1/Fbxl5/Psen1/Senp1/Psmd14/Trib3/Amn1/Fbxl2/Anapc4/Rnf103/Ubr3/Ubr1/Derl2/Hspa1b/Rnf144a/Rnf5/Sirt2/Skp2/Skp2/Ube2d3/Fbxl3/Nhlrc3/Erlin1/Cdc34/Clu/Rchy1/Maea/Dmac2/Map1a/Ube3a/Topors	54
BP	GO:1990778	protein localization to cell periphery	50/1856	338/21092	0.000192148	0.0208607	0.0175929	F11r/Nsf/Ttc8/Golph3l/Dab2/Git1/Magi2/Nrxn1/Rapsn/Rapsn/Ramp2/Trem2/Trem2/Ttc7/Zdhhc23/Rapgef6/Dchs1/Bbip1/Itga3/Ikbkb/Adam22/Lrp6/Epb41/Myl12a/Sptbn1/Anln/Fcho2/Kcnb1/Sorbs1/Cacnb3/Camk2g/Ttc7b/Akap5/Mrap2/Fgf13/Tspan5/Rack1/Atp2c2/Nsg1/Epb41l3/Rab13/Rab3c/Ank1/Bcl2l1/Actr3/Myo5a/Rab3a/Rab3a/Rapgef2/Tnf	50
BP	GO:0022409	positive regulation of cell-cell adhesion	38/1856	236/21092	0.00019783	0.0210798	0.0177777	Vnn1/Il1rl2/Nr4a3/H2-T23/Gata3/Rara/Nck1/Prkcq/Itgal/Myo10/Cd47/Fam49b/Rap1gap/Itga6/Ptprc/Runx1/Wnt5a/Adam8/Cited2/Spn/Rasal3/Ager/Sirpa/Il2rg/Adam19/Alox15/Slamf1/Malt1/Ada/Gcnt2/Cd74/Cd44/Rasgrp1/Piezo1/Ap3b1/Tnf/Coro1a/Icam1	38
BP	GO:0009615	response to virus	42/1856	270/21092	0.000204707	0.0214161	0.0180613	Polr3b/Lyst/Ifitm2/Hyal2/Oasl1/Nop53/Apobec3/Slfn9/Slfn9/Slfn9/Slfn9/Il33/Hyal1/H2-Q7/Ptprc/Polr3f/Irgm2/Tlr3/Parp9/Spon2/Spn/Exosc4/Pum1/Pum1/Map3k14/Ifnar2/Bcl2l11/Zmynd11/Chuk/Mill2/Polr3e/Mst1r/Skp2/Skp2/Dhx58/Abcf3/Ilf3/Bcl2l1/Tbk1/Tnf/Sec14l1/Batf3	42
BP	GO:0072001	renal system development	45/1856	296/21092	0.000211325	0.0217136	0.0183122	Ttc8/Pkd1/Adamts1/Agt/Mef2c/Arg2/Gata3/Npnt/Eya1/Arid5b/Fgfr2/Dchs1/Itga3/Rara/Mpv17/Wnt11/Ednra/Prkcsh/Myo1e/Fgf2/Itga6/Wnt5a/Nphp3/Ift88/Cys1/Dll1/Cux1/Col4a4/Flcn/Epha4/Cenpf/Pdgfra/Tns2/Gcnt1/Bcl2l11/Akr1b3/Ctnnd1/Ctnnd1/Ace/Nrp1/Dact2/Nfia/Klf15/Cd44/Six1	45
BP	GO:0044843	cell cycle G1/S phase transition	32/1856	188/21092	0.000220706	0.021889	0.0184601	Eif4g1/Fhl1/Tcf3/Zc3h12d/Adamts1/Paf1/Dgkz/Mepce/Jade1/Klf11/Lats2/Rptor/Ccnd3/Hyal1/Cdkn1a/Camk2g/Nacc2/E2f4/Rbm38/Nfatc1/Dbf4/Stxbp4/Skp2/Skp2/Acvr1b/Men1/Men1/Tcf19/E2f6/Fbxo7/Ezh2/Cradd	32
BP	GO:0072659	protein localization to plasma membrane	42/1856	271/21092	0.000222069	0.021889	0.0184601	F11r/Nsf/Ttc8/Golph3l/Dab2/Nrxn1/Ramp2/Trem2/Trem2/Ttc7/Zdhhc23/Rapgef6/Dchs1/Itga3/Ikbkb/Lrp6/Myl12a/Sptbn1/Fcho2/Kcnb1/Sorbs1/Cacnb3/Camk2g/Ttc7b/Akap5/Mrap2/Fgf13/Tspan5/Rack1/Atp2c2/Nsg1/Epb41l3/Rab13/Rab3c/Ank1/Bcl2l1/Actr3/Myo5a/Rab3a/Rab3a/Rapgef2/Tnf	42
BP	GO:1900746	regulation of vascular endothelial growth factor signaling pathway	7/1856	16/21092	0.000226377	0.021889	0.0184601	Adamts3/Dll1/Ptp4a3/Dab2ip/Ccbe1/Myo1c/Sema6a	7
BP	GO:0090068	positive regulation of cell cycle process	39/1856	246/21092	0.000228249	0.021889	0.0184601	Sh2b1/Nusap1/Eif4g1/Terf1/Adamts1/Paf1/Mepce/Atrx/Phip/Pkp4/Rptor/Ccnd3/Dtl/Hyal1/Vps4b/Cdkn1a/Ddx11/Lmnb1/Wnt5a/Rbm38/Nudt16/Anapc5/Hnrnpu/Hnrnpu/Dab2ip/Anapc4/Dbf4/Stxbp4/Sirt2/Map10/Cenpv/Aurkb/Ect2/Cdc6/Tnf/Cenpe/Ezh2/Cenpj/Cradd	39
BP	GO:0032092	positive regulation of protein binding	22/1856	111/21092	0.000235959	0.0221845	0.0187093	Nmd3/Pkd1/Mef2c/Rpl11/Epb41/Spag8/Fkbp1a/Hspa4/Wnt5a/Stpg1/Tcf7l2/Psen1/Epha4/Trib3/Sppl3/Ace/Eif2ak3/Abl2/Men1/Men1/Actr3/Rapgef2	22
BP	GO:0007265	Ras protein signal transduction	57/1856	403/21092	0.000239041	0.0221845	0.0187093	Cyfip1/Dennd4b/Prex2/Rgl2/Git1/Ralgps1/Dgkz/Rapgef3/Kras/Itga3/Rab33b/Eps8l1/Dnmt1/Lpar2/Dlc1/Map4k4/Ednra/Cyth4/Rabl3/Rsu1/Rasal3/Flcn/Arhgef25/Arhgef28/Dab2ip/Prag1/Arpp19/Synj2bp/Adra1a/Arhgef11/Rab13/Rab3c/Chuk/Arhgap24/Rab24/Adgrg1/Nrp1/P2ry10/Trim67/Mapkapk5/Eps8l2/Plekhg3/Abi2/Itsn2/Abl2/Rasgrp1/Ngef/Cdc42ep4/Ect2/Syngap1/Arhgap42/Arhgef2/Rab3a/Rab3a/Rapgef2/Rassf1/F2rl2	57
BP	GO:0051656	establishment of organelle localization	65/1856	476/21092	0.000251071	0.0228137	0.0192399	Sec16a/Tmem230/Sec16b/Nusap1/Nmd3/Terf1/Llgl2/Git1/Spice1/Nr4a3/Snca/Eya1/Cep63/Nde1/Fgfr2/Ap3m2/Tor1a/Tmem201/Chmp6/Nup88/Kif3c/Rps15/Shroom2/Tbc1d23/Vps4b/A830010M20Rik/Cadps2/Eif6/Trak1/Ctbp2/Dock7/Syde1/Sec23b/Atp2a2/Hnrnpu/Hnrnpu/Cenpc1/Spg11/Actn4/Psen1/Cenpf/Adra1a/Cenpa/Myo5c/Syne2/Rrs1/P2rx7/Ap1s2/Htr2a/Syt17/Dnm3/Nuf2/Bcl2l1/Rasgrp1/Actr3/Stk25/Kit/Ap3b1/Myo5a/Arhgef2/Rab3a/Rab3a/Syt7/M…	65
BP	GO:0043393	regulation of protein binding	38/1856	239/21092	0.000256956	0.0228137	0.0192399	Nmd3/Dab2/Tmbim6/Pkd1/Mef2c/Ppara/Disc1/Rpl11/Epb41/Adnp/Aes/Spag8/Fkbp1a/Sympk/Hspa4/Ddx11/Wnt5a/Stpg1/Psen2/Gpsm1/Tcf7l2/Psen1/Dab2ip/Tdg/Epha4/Trib3/Rgma/Mark2/Sppl3/Aplp2/Ace/Eif2ak3/Abl2/Men1/Men1/Actr3/Aurkb/Rapgef2	38
BP	GO:0006513	protein monoubiquitination	16/1856	69/21092	0.000257715	0.0228137	0.0192399	Skp1a/Paf1/Leo1/Klhl22/Dtl/Pex12/Pex12/Pex12/Pex12/Rnf40/Fbxl2/Pcgf2/Ube2d3/Pcgf1/Rnf20/Topors	16
BP	GO:0031589	cell-substrate adhesion	48/1856	325/21092	0.000265099	0.0231118	0.0194913	Dusp3/Itga1/Dab2/Eda/Bcar1/Fn1/Agt/Npnt/Ninj1/Slk/Antxr1/Disc1/Itga3/Emid1/Dlc1/Map4k4/Limch1/Iqgap1/Camsap3/Itgal/Parva/Macf1/Pxn/Sorbs1/Radil/Itga6/Rsu1/Adam8/Srgap2/Mkln1/Ccl25/Actn4/Sirpa/Zyx/Alox15/Ppm1f/Bcl2l11/Gcnt2/Fbln2/Col1a1/Nrp1/Ldb1/Men1/Men1/Fermt3/Rasa1/Serpine1/Coro1a	48
BP	GO:1901987	regulation of cell cycle phase transition	44/1856	291/21092	0.00027886	0.0239486	0.0201971	Rint1/Eif4g1/Fhl1/Terf1/Babam2/Tcf3/Ctc1/Zc3h12d/Adamts1/Paf1/Zfp36l1/Anapc15/Dgkz/Mepce/Rad17/Jade1/Nop53/Rptor/Prkcq/Klhl22/Ccnd3/Dtl/Hyal1/Vps4b/Cdkn1a/Lmnb1/Bub1/Nacc2/Rbm38/Anapc5/Cenpf/Anapc4/Dbf4/Ercc3/Stxbp4/Men1/Men1/Aurkb/Fbxo7/Cdc6/Nek11/Cenpe/Ezh2/Cradd	44
BP	GO:0018205	peptidyl-lysine modification	49/1856	335/21092	0.000289912	0.0245317	0.0206888	Vipas39/Jarid2/Kdm4a/Tcf3/Snca/Gata3/Eya1/Atrx/Jade1/Ash2l/Dohh/Bcl11a/Dnmt1/Gnl3/Ehmt2/Atat1/Suv39h1/Kat8/Yeats2/Kat6a/Nfe2/Kmt5b/Pax5/Ing3/Senp6/Naa60/Hcfc1/Flcn/Ctbp1/Senp1/Setd5/Sumo3/Mbd3/Pcgf2/Kdm4b/Lox/Sirt2/Msl1/Jade2/Epc1/Plod2/Klf15/Setd1a/Kmt5c/Ldb1/Msl3/Ezh2/Topors/Trrap	49
BP	GO:2001243	negative regulation of intrinsic apoptotic signaling pathway	20/1856	98/21092	0.000297173	0.0247817	0.0208996	Vnn1/Gpx1/Tmbim6/Cep63/Bdkrb2/Ptpn1/Parl/Tmem161a/March7/Sh3glb1/G2e3/Bcl2l2/Trim32/Cd74/Cd44/Ybx3/Clu/Bcl2l1/Zfp385a/Hyou1	20
BP	GO:0150076	neuroinflammatory response	11/1856	38/21092	0.000305803	0.025137	0.0211993	Agt/Snca/Tlr4/Cd200/Mmp8/Il33/Tlr3/Ager/Psen1/Ldlr/Clu	11
BP	GO:0034330	cell junction organization	39/1856	250/21092	0.000319278	0.0257777	0.0217396	Dusp3/Fn1/Agt/Ramp2/Sh3bp1/Lsr/Slk/Ikbkb/Pkp4/Hdac7/Dlc1/Map4k4/Limch1/Iqgap1/Camsap3/Wnt11/Shroom2/Macf1/Dst/Pard3/Pxn/Sorbs1/Actn4/Flcn/Ppm1f/Epb41l3/Rab13/Lims2/Xirp2/Ctnnd1/Ctnnd1/Ace/Nrp1/Gjc1/Ldb1/Ect2/Myo1c/Rapgef2/Tnf	39
BP	GO:0051058	negative regulation of small GTPase mediated signal transduction	14/1856	57/21092	0.00032708	0.0257777	0.0217396	Git1/Sh3bp1/Dgkz/Itga3/Dlc1/Rasal3/Flcn/Dab2ip/Adra1a/Arhgap24/Trim67/Abl2/Syngap1/Arhgap42	14
BP	GO:0000910	cytokinesis	27/1856	152/21092	0.000329649	0.0257777	0.0217396	Jtb/Prpf40a/Nusap1/Git1/Sept2/Sept2/Kif4/Pkp4/Daxx/Chmp6/Sptbn1/Anln/Vps4b/Sh3glb1/Ist1/Flcn/Zfp365/Cenpa/Map10/Sept3/Prc1/Bcl2l1/Actr3/Cenpv/Aurkb/Ect2/Cdc6	27
BP	GO:0098727	maintenance of cell number	29/1856	168/21092	0.000334024	0.0257777	0.0217396	Ddx6/Ncoa3/Paf1/Leo1/Smc3/Nfya/Nfya/Gnl3/Dis3l2/Med12/Klf10/Fancc/Bcl9l/Fgfr3/Kat6a/Fut10/Dll1/Tcf7l2/Wdr62/Aspm/Stag2/Prdm16/Med28/Setd1a/Ldb1/Kit/Elf5/Ezh2/Med15	29
BP	GO:0006026	aminoglycan catabolic process	9/1856	27/21092	0.000335997	0.0257777	0.0217396	Lyve1/Hyal2/Ctbs/Idua/Hyal1/Fgf2/Gns/Chil3/Cd44	9
BP	GO:1901214	regulation of neuron death	51/1856	355/21092	0.000341469	0.0257857	0.0217463	Cd34/Gpx1/Parp2/Itga1/Nr4a2/Bbc3/Nr4a3/Agt/Rapsn/Rapsn/Mef2c/Snca/Ppara/Tlr4/Gata3/Itpr1/Bag1/Kras/Clcf1/Clcf1/Ncoa7/Ikbkb/Hdac7/Daxx/Adnp/Kcnb1/Fcgr2b/Wnt5a/Abcc1/Fgfr3/Adam8/Ntf3/Rack1/Ager/Psen1/Bcl2l11/Akt1s1/Nrp1/Cdc34/Clu/Nqo1/Bcl2l1/Six1/Fbxo7/C5ar1/Syngap1/Mt1/Kmo/Hyou1/Tnf/Coro1a	51
BP	GO:0071696	ectodermal placode development	7/1856	17/21092	0.000355672	0.0257857	0.0217463	Frs2/Gnas/Eda/Pou2f1/Lrp6/Nrp1/Six1	7
BP	GO:1902547	regulation of cellular response to vascular endothelial growth factor stimulus	7/1856	17/21092	0.000355672	0.0257857	0.0217463	Adamts3/Dll1/Ptp4a3/Dab2ip/Ccbe1/Myo1c/Sema6a	7
BP	GO:0031032	actomyosin structure organization	32/1856	193/21092	0.000358485	0.0257857	0.0217463	Eln/F11r/Actg1/Ttc8/Mef2c/Limk1/Ppp1r9a/Rapgef3/Prkcq/Epb41/Dlc1/Limch1/Anln/Pfn1/Wnt11/Pxn/Sorbs1/Ldb3/Tmod4/Evl/Foxp1/Zyx/Pdgfra/Ppm1f/Epb41l3/Ttn/Nrp1/Phactr1/Mef2a/Cnn1/Kank3/Ect2	32
BP	GO:0046580	negative regulation of Ras protein signal transduction	13/1856	51/21092	0.000358508	0.0257857	0.0217463	Git1/Dgkz/Itga3/Dlc1/Rasal3/Flcn/Dab2ip/Adra1a/Arhgap24/Trim67/Abl2/Syngap1/Arhgap42	13
BP	GO:0002244	hematopoietic progenitor cell differentiation	27/1856	153/21092	0.000367344	0.0260951	0.0220072	Gata3/Kcp/Hyal2/Apobec3/Zswim9/Anln/Ssbp3/Ptprc/Runx1/Dock7/Eml1/Tmem143/Psen2/Cited2/Slc37a4/Psen1/Sirpa/Flcn/Fnip1/Pdgfra/Rrs1/Dact2/Setd1a/Pld4/Pld4/Kit/Eef2	27
BP	GO:0097193	intrinsic apoptotic signaling pathway	44/1856	295/21092	0.000377025	0.0261997	0.0220955	Vnn1/S100a8/Gpx1/Tmbim6/Bbc3/Zfp385b/Cep63/Itpr1/Bdkrb2/Rpl11/Nck1/Siah1a/Ptpn1/Cdkn1a/Parl/Tmem161a/Bub1/Nacc2/Ifi204/Nupr1/March7/Sh3glb1/Rack1/Flcn/Dab2ip/Trib3/Htra2/Ppm1f/G2e3/Bcl2l11/Bcl2l2/Trim32/Eif2ak3/Zfp622/Cd74/Cd44/Ybx3/Clu/Bcl2l1/Stk25/Zfp385a/Hyou1/Tnf/Topors	44
BP	GO:0010976	positive regulation of neuron projection development	51/1856	357/21092	0.000390536	0.0261997	0.0220955	Cyfip1/Magi2/Fn1/Adamts1/Agt/Limk1/Ppp1r9a/Disc1/Plxnc1/Itga3/Bcl11a/Ikbkb/Shank3/Nck1/Lrp6/Adnp/Stau2/Iqgap1/Kif3c/Mob2/Retreg3/Trak1/Wnt5a/Adam17/Akap5/Alkal1/Sh3glb1/Plaa/Ist1/Cux1/Psen1/Dab2ip/Epha4/Rgma/Mark2/Plxna3/Neu1/Nlgn2/Eif2b2/Fkbp1b/Syt17/Nrp1/Trim67/Mapkapk5/Itsn2/Abl2/Actr3/Stk25/Sema7a/Rapgef2/Ezh2	51
BP	GO:0001881	receptor recycling	11/1856	39/21092	0.000392385	0.0261997	0.0220955	Nsf/Plekhj1/Dab2/Snca/Tbc1d16/Gria3/Psen2/Psen1/Nsg1/Rep15/Kif16b	11
BP	GO:0006914	autophagy	53/1856	375/21092	0.000395062	0.0261997	0.0220955	Clec16a/Tcirg1/S100a8/Kdm4a/Dapl1/Eif4g1/Tmbim6/Snca/Plekhm1/Rb1cc1/Vps13c/Atg2a/Atg2a/Lepr/Rab33b/Klhl22/Vps13a/Atpif1/Rufy4/Ehmt2/Vps4b/Hspa8/Tecpr1/Parl/Atp13a2/Mtdh/Atg13/Irgm2/Kat8/Sh3glb1/Ift88/Plaa/Sec23b/Gpsm1/Tbc1d5/Ager/Psen1/Flcn/Trp53inp2/Htra2/Adra1a/Fbxl2/Bcl2l11/Usp13/Rnf5/Sirt2/Rab24/Spata18/Anxa7/Fbxo7/Acbd5/Tbk1/Tmem150b	53
BP	GO:0061919	process utilizing autophagic mechanism	53/1856	375/21092	0.000395062	0.0261997	0.0220955	Clec16a/Tcirg1/S100a8/Kdm4a/Dapl1/Eif4g1/Tmbim6/Snca/Plekhm1/Rb1cc1/Vps13c/Atg2a/Atg2a/Lepr/Rab33b/Klhl22/Vps13a/Atpif1/Rufy4/Ehmt2/Vps4b/Hspa8/Tecpr1/Parl/Atp13a2/Mtdh/Atg13/Irgm2/Kat8/Sh3glb1/Ift88/Plaa/Sec23b/Gpsm1/Tbc1d5/Ager/Psen1/Flcn/Trp53inp2/Htra2/Adra1a/Fbxl2/Bcl2l11/Usp13/Rnf5/Sirt2/Rab24/Spata18/Anxa7/Fbxo7/Acbd5/Tbk1/Tmem150b	53
BP	GO:0034504	protein localization to nucleus	43/1856	287/21092	0.000396271	0.0261997	0.0220955	Nmd3/Skp1a/Agt/Paf1/Arntl/Hyal2/Mdfic/Nop53/Rpl11/Tor1a/Tmem201/Phip/Mbtps1/Prkcq/Ipo11/Nup88/Nup188/Banp/Hspa8/Cdkn1a/Cnep1r1/Pkig/Akap5/Parp9/Tor1aip1/Hnrnpu/Hnrnpu/Psen1/Flcn/Sumo3/Txnip/Fam53a/Syne2/Col1a1/Rrs1/Ipo4/Eif2ak3/Six1/Nol8/Taf3/Ect2/Tnf/Topors	43
BP	GO:0099173	postsynapse organization	31/1856	186/21092	0.00040069	0.0261997	0.0220955	Magi2/Nrxn1/Rapsn/Rapsn/Tanc1/Dgkz/Ppp1r9a/Itga3/Shank3/Arhgap22/Dgkb/Ndrg2/Stau2/Hspa8/Dock10/Fcgr2b/Wnt5a/Nrcam/Zfp365/Epha4/Nlgn2/Nrp1/Dnm3/Abi2/Ptprs/Sipa1l1/Abl2/Actr3/Ngef/Syngap1/Ube3a	31
BP	GO:1904705	regulation of vascular smooth muscle cell proliferation	13/1856	52/21092	0.000439956	0.0280596	0.0236641	Frs2/Nr4a3/Adamts1/Agt/Mef2c/Pparg/Dnmt1/Cdkn1a/Fgf2/Mmp2/Prkg1/Cnn1/Tnf	13
BP	GO:1990874	vascular smooth muscle cell proliferation	13/1856	52/21092	0.000439956	0.0280596	0.0236641	Frs2/Nr4a3/Adamts1/Agt/Mef2c/Pparg/Dnmt1/Cdkn1a/Fgf2/Mmp2/Prkg1/Cnn1/Tnf	13
BP	GO:0034341	response to interferon-gamma	25/1856	139/21092	0.000443766	0.0280596	0.0236641	Eprs/Actg1/Ifitm2/Snca/Tlr4/Ccl6/Pparg/Ciita/H2-Q7/Irgm2/Parp9/Ccl25/Evl/Rpl13a/Zyx/Stxbp4/Slc26a6/Slc26a6/Ccl21a/Kif16b/Actr3/Gbp5/Kynu/Cdc42ep4/Myo1c	25
BP	GO:0045785	positive regulation of cell adhesion	56/1856	405/21092	0.000477926	0.0298912	0.0252087	Vnn1/Il1rl2/Dab2/Nr4a3/Fn1/H2-T23/Gata3/Npnt/Ninj1/Disc1/Itga3/Rara/Nck1/Prkcq/Emid1/Map4k4/Iqgap1/Itgal/Myo10/Hyal1/Cd47/Fam49b/Rap1gap/Itga6/Ptprc/Runx1/Wnt5a/Rsu1/Adam8/Cited2/Spn/Ccl25/Rasal3/Ager/Sirpa/Flcn/Il2rg/Adam19/Alox15/Ppm1f/Slamf1/Malt1/Ada/Gcnt2/Fbln2/Adgrg1/Nrp1/Cd74/Cd44/Ldb1/Rasgrp1/Piezo1/Ap3b1/Tnf/Coro1a/Icam1	56
BP	GO:0035307	positive regulation of protein dephosphorylation	11/1856	40/21092	0.00049862	0.0304179	0.0256529	Itga1/Magi2/Dlc1/Ppp1r16b/Sympk/Cnep1r1/Ptprc/Ankle2/Sppl3/Ppp1r15b/Vrk3	11
BP	GO:0019827	stem cell population maintenance	28/1856	164/21092	0.000503095	0.0304179	0.0256529	Ddx6/Ncoa3/Paf1/Leo1/Smc3/Nfya/Nfya/Gnl3/Dis3l2/Med12/Klf10/Fancc/Bcl9l/Fgfr3/Kat6a/Fut10/Dll1/Tcf7l2/Wdr62/Aspm/Stag2/Prdm16/Med28/Setd1a/Ldb1/Kit/Elf5/Med15	28
BP	GO:0001738	morphogenesis of a polarized epithelium	17/1856	80/21092	0.000503691	0.0304179	0.0256529	Ttc8/Dab2/Sh3bp1/Dchs1/Lrp6/Intu/Intu/Camsap3/Wnt11/Med12/Wnt5a/Fzd6/Fzd6/Ctnnd1/Ctnnd1/Mllt3/Abl2	17
BP	GO:0051145	smooth muscle cell differentiation	16/1856	73/21092	0.000507494	0.0304179	0.0256529	Mkl1/Mesp1/Agt/Mef2c/Ramp2/Npnt/Fgfr2/Zeb1/Dnmt1/Smarca2/Ntf3/Nfatc1/Med28/Prdm6/Six1/Kit	16
BP	GO:0045787	positive regulation of cell cycle	51/1856	362/21092	0.000541979	0.0318911	0.0268954	Sh2b1/Nusap1/Eif4g1/Dusp3/Terf1/Nr4a3/Tcf3/Adamts1/Paf1/Mepce/Atrx/Fgfr2/Phip/Rara/Pkp4/Rptor/Lrp6/Ccnd3/Dtl/Hyal1/Vps4b/Cdkn1a/Ddx11/Lmnb1/Wnt5a/Rbm38/Nudt16/Anapc5/Cited2/Hnrnpu/Hnrnpu/Dab2ip/Anapc4/Dbf4/Bcl2l11/Stxbp4/Sirt2/Gdpd5/Map10/Ccnjl/Trim32/Cenpv/Aurkb/Ect2/Cdc6/Tnf/Cenpe/Ezh2/Cenpj/Cradd/Rassf1	51
BP	GO:0042176	regulation of protein catabolic process	52/1856	371/21092	0.000543158	0.0318911	0.0268954	Nsf/Clec16a/Gpx1/Dab2/Pkd1/Snca/Arntl/Nop53/Disc1/Rpl11/Chmp6/Atpif1/Il33/Dtl/Usp14/Csnk1a1/Banp/Hspa1a/Atp13a2/Timp3/Csnk2a2/Rnf40/Wnt5a/March7/Adam8/Psen2/Rack1/Fbxl5/Psen1/Senp1/Dab2ip/Psmd14/Epha4/Trib3/Sumo3/Rgma/Ldlr/Usp13/Derl2/Hspa1b/Rnf144a/Sirt2/Mad2l2/Trim67/Trim32/Clu/Rchy1/Psmf1/Map1a/Laptm4b/Tnf/Ube3a	52
BP	GO:0045666	positive regulation of neuron differentiation	61/1856	454/21092	0.000584151	0.0336759	0.0284005	Cyfip1/Kdm4a/Eif4g1/Magi2/Tcf3/Fn1/Adamts1/Agt/Mef2c/Limk1/Ppp1r9a/Disc1/Plxnc1/Zeb1/Itga3/Bcl11a/Ikbkb/Rara/Shank3/Nck1/Lrp6/Adnp/Stau2/Iqgap1/Kif3c/Mob2/Retreg3/Trak1/Wnt5a/Adam17/Akap5/Alkal1/Sh3glb1/Plaa/Ist1/Cux1/Psen1/Dab2ip/Epha4/Rgma/Mark2/Plxna3/Neu1/Nlgn2/Eif2b2/Fkbp1b/Gdpd5/Syt17/Nrp1/Trim67/Mapkapk5/Trim32/Itsn2/Abl2/Actr3/Stk25/Ect2/Arhgef2/Sema7a/Rapgef2/Ezh2	61
BP	GO:1901888	regulation of cell junction assembly	17/1856	81/21092	0.000586036	0.0336759	0.0284005	Dusp3/Agt/Slk/Ikbkb/Dlc1/Map4k4/Limch1/Iqgap1/Camsap3/Macf1/Ppm1f/Ace/Nrp1/Ldb1/Myo1c/Rapgef2/Tnf	17
BP	GO:0048872	homeostasis of number of cells	45/1856	310/21092	0.000591113	0.0336759	0.0284005	Hoxa5/Tcf3/Mef2c/Mthfd1/Zfp36l1/Gata3/Slc11a2/Kras/Sfxn1/Ikbkb/Prdx1/Ildr2/Atpif1/Il20rb/Dnase2a/Dock10/Fancc/Fcgr2b/Adam17/Rassf2/Ift88/Cited2/Slc37a4/Senp1/Ada/Bcl2l11/Ank1/Hba-a1/Prmt1/Atxn2/P2rx7/Mpl/Acvr1b/Setd1a/Dock11/Cd74/Cd44/Ldb1/Men1/Men1/Maea/Kit/Rps14/Coro1a/Ezh2	45
BP	GO:0001919	regulation of receptor recycling	9/1856	29/21092	0.000611008	0.0338052	0.0285096	Nsf/Dab2/Snca/Tbc1d16/Gria3/Psen2/Psen1/Nsg1/Kif16b	9
BP	GO:0051642	centrosome localization	9/1856	29/21092	0.000611008	0.0338052	0.0285096	Akap9/Nde1/Tmem201/Pard3/Aspm/Syne2/Spout1/Sema6a/Dync1li2	9
BP	GO:0051984	positive regulation of chromosome segregation	9/1856	29/21092	0.000611008	0.0338052	0.0285096	Ddx11/Anapc5/Hnrnpu/Hnrnpu/Anapc4/Smc6/Sirt2/Cdc6/Cenpe	9
BP	GO:1903052	positive regulation of proteolysis involved in cellular protein catabolic process	21/1856	111/21092	0.000620903	0.0340255	0.0286954	Dab2/Nop53/Disc1/Atpif1/Il33/Csnk1a1/Hspa1a/Rnf40/Psen2/Rack1/Psen1/Dab2ip/Trib3/Sumo3/Usp13/Hspa1b/Rnf144a/Sirt2/Trim67/Clu/Rchy1	21
BP	GO:0070374	positive regulation of ERK1 and ERK2 cascade	38/1856	250/21092	0.000632389	0.034328	0.0289505	Cysltr2/Nrxn1/Trem2/Trem2/Tlr4/Npnt/Ccl6/Fgfr2/Rara/Hmgcr/Ednra/Fgf2/Ptprc/Adam17/Fgfr3/Alkal1/Ccl25/Ager/Epha4/Pdgfra/Alox15/Adra1a/Slamf1/Gcnt2/St5/Mst1r/Htr2a/Nrp1/Cd74/Cd44/Ccl21a/Abl2/Rasgrp1/Kit/C5ar1/Sema7a/Rapgef2/Icam1	38
BP	GO:0008584	male gonad development	22/1856	119/21092	0.000647591	0.0346576	0.0292284	Abcb1a/Safb2/Akap9/Gata3/Atrx/Arid5b/Rara/Sf1/Sf1/Wnt5a/Nupr1/Cited2/Pdgfra/Aspm/Rab13/Bcl2l11/Bcl2l2/Adgrg1/Ybx3/Rec8/Bcl2l1/Icam1	22
BP	GO:0035306	positive regulation of dephosphorylation	13/1856	54/21092	0.000650507	0.0346576	0.0292284	Itga1/Magi2/Mef2c/Npnt/Dlc1/Ppp1r16b/Sympk/Cnep1r1/Ptprc/Ankle2/Sppl3/Ppp1r15b/Vrk3	13
BP	GO:0008654	phospholipid biosynthetic process	27/1856	159/21092	0.000683939	0.035428	0.0298782	Sgms1/Pigp/Dgkz/Pemt/Pigx/Agpat3/Fgf2/Sh3glb1/Cept1/Pnpla3/Alox15/Sgms2/Sgms2/Plcg2/Dgka/Htr2a/Serac1/Pigo/Pgap1/Pign/Hmgcs1/Agpat4/Pisd/Vac14/Pigb/Gpaa1/Dpagt1	27
BP	GO:0048638	regulation of developmental growth	54/1856	393/21092	0.000693443	0.035428	0.0298782	Cyfip1/Jarid2/Gnas/Parp2/Fn1/Agt/Mef2c/Limk1/Ppara/Sema4c/Fgfr2/Disc1/Arhgap4/Bcl11a/Lats2/Daxx/Adnp/Sema6d/Tbx5/Siah1a/Fgf2/Wnt5a/Fgfr3/Suv39h1/Fgf13/Sh3glb1/Plaa/Dll1/Azgp1/Ist1/Cited2/Mgll/Tcf7l2/Foxp1/Htra2/Rgma/Bcl2l11/Plxna3/Eif2b2/Atxn2/Wnt2/Syt17/Nrp1/Ptprs/Itsn2/Ybx3/Men1/Men1/Actr3/Six1/Serpine1/Sema7a/Sgip1/Sema6a	54
BP	GO:0001655	urogenital system development	48/1856	339/21092	0.000694586	0.035428	0.0298782	Frs2/Ttc8/Pkd1/Adamts1/Agt/Mef2c/Arg2/Gata3/Npnt/Eya1/Arid5b/Fgfr2/Dchs1/Itga3/Rara/Mpv17/Wnt11/Ednra/Prkcsh/Myo1e/Fgf2/Itga6/Wnt5a/Nphp3/Ift88/Cys1/Dll1/Cux1/Col4a4/Flcn/Epha4/Cenpf/Pdgfra/Tns2/Gcnt1/Mmp2/Bcl2l11/Akr1b3/Ctnnd1/Ctnnd1/Ace/Nrp1/Dact2/Nfia/Klf15/Cd44/Six1/Ube3a	48
BP	GO:0050771	negative regulation of axonogenesis	15/1856	68/21092	0.000699449	0.035428	0.0298782	Sema4c/Arhgap4/Bcl11a/Sema6d/Wnt5a/Fgf13/Psen1/Rgma/Plxna3/Nrp1/Ptprs/Actr3/Syngap1/Sema7a/Sema6a	15
BP	GO:1901990	regulation of mitotic cell cycle phase transition	39/1856	260/21092	0.000702989	0.035428	0.0298782	Rint1/Eif4g1/Fhl1/Terf1/Tcf3/Ctc1/Zc3h12d/Adamts1/Zfp36l1/Anapc15/Dgkz/Mepce/Rad17/Jade1/Nop53/Rptor/Prkcq/Klhl22/Ccnd3/Dtl/Hyal1/Vps4b/Cdkn1a/Lmnb1/Bub1/Nacc2/Rbm38/Anapc5/Cenpf/Anapc4/Dbf4/Ercc3/Aurkb/Fbxo7/Cdc6/Nek11/Cenpe/Ezh2/Cradd	39
BP	GO:0032963	collagen metabolic process	19/1856	97/21092	0.000710945	0.035428	0.0298782	Vipas39/Mmp19/Serpinh1/Cygb/Rapgef3/Pparg/Adamts3/Idua/Mmp8/Mfap4/Fgfr3/Ager/Tns2/Errfi1/Mmp2/Col1a1/P2rx7/Plod2/Serpine1	19
BP	GO:1904738	vascular associated smooth muscle cell migration	8/1856	24/21092	0.000720115	0.035428	0.0298782	Nr4a3/Adamts1/Agt/Mef2c/Iqgap1/Dock7/Prkg1/Myo5a	8
BP	GO:1904752	regulation of vascular associated smooth muscle cell migration	8/1856	24/21092	0.000720115	0.035428	0.0298782	Nr4a3/Adamts1/Agt/Mef2c/Iqgap1/Dock7/Prkg1/Myo5a	8
BP	GO:0051607	defense response to virus	35/1856	226/21092	0.000720382	0.035428	0.0298782	Polr3b/Lyst/Ifitm2/Hyal2/Oasl1/Nop53/Apobec3/Slfn9/Slfn9/Slfn9/Slfn9/Il33/H2-Q7/Ptprc/Polr3f/Tlr3/Parp9/Spon2/Spn/Exosc4/Pum1/Pum1/Map3k14/Ifnar2/Zmynd11/Chuk/Mill2/Polr3e/Skp2/Skp2/Dhx58/Abcf3/Ilf3/Tbk1/Sec14l1	35
BP	GO:0046546	development of primary male sexual characteristics	22/1856	120/21092	0.000728291	0.0355134	0.0299502	Abcb1a/Safb2/Akap9/Gata3/Atrx/Arid5b/Rara/Sf1/Sf1/Wnt5a/Nupr1/Cited2/Pdgfra/Aspm/Rab13/Bcl2l11/Bcl2l2/Adgrg1/Ybx3/Rec8/Bcl2l1/Icam1	22
BP	GO:0006491	N-glycan processing	6/1856	14/21092	0.000743313	0.0356203	0.0300403	St8sia4/Prkcsh/Man2a2/Man1b1/Fut8/Man1a	6
BP	GO:0070262	peptidyl-serine dephosphorylation	6/1856	14/21092	0.000743313	0.0356203	0.0300403	Nck1/Ppp1r16b/Ppm1f/Ppp2r2d/Ppp1r15b/Ppp2r2c	6
BP	GO:0030111	regulation of Wnt signaling pathway	42/1856	287/21092	0.000749054	0.0356203	0.0300403	Nfkb1/Mesp1/Dab2/Eda/Arntl/Wif1/Jade1/Mdfic/Tsku/Fgfr2/Disc1/Itga3/Lats2/Lrp6/Aes/Wnt11/Macf1/Gid8/Csnk1a1/Med12/Fgf2/Wnt5a/Fgfr3/Nphp3/Axin2/Tcf7l2/Psen1/Fzd6/Fzd6/Dab2ip/Aspm/Col1a1/Mad2l2/Ctnnd1/Ctnnd1/Dact2/Limd1/Mllt3/Abl2/Wnk1/Tmem170b/Chd8	42
BP	GO:0018105	peptidyl-serine phosphorylation	44/1856	305/21092	0.000769858	0.0362457	0.0305678	Eif4g1/Nrxn1/Pkd1/Agt/Akap9/Snca/Bdkrb2/Rapgef3/Mapkapk3/Ikbkb/Phip/Lats2/Rptor/Nck1/Prkcq/Mast3/Mast3/Csnk1a1/Pkn3/Csnk2a2/Dock7/Wnt5a/Irgm2/Rassf2/Clk1/Dmpk/Ntf3/Rack1/Fnip1/Ppm1f/Mark2/Chuk/Mad2l2/Smg1/Mapkapk5/Eif2ak3/Cd44/Wnk1/Aurkb/Tbk1/Tnf/Bcar3/Sgk3/Vrk3	44
BP	GO:0035265	organ growth	33/1856	210/21092	0.00077837	0.0362457	0.0305678	Jarid2/Mesp1/Parp2/Agt/Mef2c/Ppara/Ly6e/Fgfr2/Lepr/Lats2/Rara/Tbx5/Ehmt2/Fgf2/Rxrb/Dll1/Cited2/Tcf7l2/Bnc2/Foxp1/Pdgfra/Adra1a/Col12a1/Bcl2l11/Ttn/Prkg1/Wnt2/Ybx3/Men1/Men1/Stc1/Sorbs2/Ube3a	33
BP	GO:0031146	SCF-dependent proteasomal ubiquitin-dependent protein catabolic process	11/1856	42/21092	0.000783791	0.0362457	0.0305678	Skp1a/Lrrc29/Fbxw5/Fbxl12/Fbxl5/Amn1/Fbxl2/Skp2/Skp2/Fbxl3/Dmac2	11
BP	GO:0006027	glycosaminoglycan catabolic process	7/1856	19/21092	0.000787401	0.0362457	0.0305678	Lyve1/Hyal2/Idua/Hyal1/Fgf2/Gns/Cd44	7
BP	GO:0061842	microtubule organizing center localization	9/1856	30/21092	0.000805336	0.0366585	0.0309159	Akap9/Nde1/Tmem201/Pard3/Aspm/Syne2/Spout1/Sema6a/Dync1li2	9
BP	GO:0016055	Wnt signaling pathway	57/1856	423/21092	0.000809113	0.0366585	0.0309159	Nfkb1/Mesp1/Dab2/Eda/Uty/Paf1/Gata3/Arntl/Grk5/Wif1/Jade1/Mdfic/Tsku/Fgfr2/Disc1/Hbp1/Itga3/Leo1/Lats2/Lrp6/Ndrg2/Aes/Wnt11/Macf1/Gid8/Csnk1a1/Med12/Fgf2/Sdc1/Csnk2a2/Wnt5a/Bcl9l/Fgfr3/Nphp3/Axin2/Tcf7l2/Psen1/Fzd6/Fzd6/Dab2ip/Aspm/Mark2/Mst1r/Col1a1/Mad2l2/Ctnnd1/Ctnnd1/Wnt2/Dact2/Limd1/Mllt3/Cd44/Abl2/Ldb1/Wnk1/Tmem170b/Chd8	57
BP	GO:0034243	regulation of transcription elongation from RNA polymerase II promoter	10/1856	36/21092	0.000817873	0.0366719	0.0309272	Dab2/Paf1/Eloc/Leo1/Supt4a/Hnrnpu/Hnrnpu/Zmynd11/Cdk13/Ezh2	10
BP	GO:0048146	positive regulation of fibroblast proliferation	15/1856	69/21092	0.000822153	0.0366719	0.0309272	Ctc1/Fn1/Agt/Cdkn1a/Kmt2c/Fbrs/Wnt5a/Ager/Pdgfra/Pla2g1b/Wnt2/Cd74/Rasa1/Serpine1/Cdc6	15
BP	GO:0071706	tumor necrosis factor superfamily cytokine production	26/1856	153/21092	0.000841576	0.0371807	0.0313563	Cd34/Zbtb20/Clec4a2/H2-T23/Arg2/Tlr4/Rara/Mmp8/Tbc1d23/Cd47/Ncl/Ptprc/Wnt5a/Zfp64/Tlr3/Spon2/Adam8/Spn/Sirpa/Slamf1/Errfi1/Azi2/Clu/Rasgrp1/Akap8/Arhgef2	26
BP	GO:0043543	protein acylation	35/1856	228/21092	0.000846484	0.0371807	0.0313563	Tcf3/Snca/Gata3/Arntl/Zdhhc16/Zdhhc23/Jade1/Zdhhc3/Rapgef3/Naa16/Atat1/Zdhhc6/Nupr1/Kat8/Yeats2/Kat6a/Nfe2/Ing3/Naa60/Hcfc1/Flcn/Ctbp1/Setd5/Mbd3/Pcgf2/Msl1/Jade2/Epc1/Klf15/Ldb1/Fam161a/Zdhhc24/Msl3/Dlst/Trrap	35
BP	GO:0001667	ameboidal-type cell migration	55/1856	406/21092	0.000873036	0.0380565	0.0320949	Gpx1/Mesp1/Bcar1/Fn1/Agt/Cap1/Mef2c/Gata3/Hyal2/Sh3bp1/Cygb/Sema4c/Arid5b/Arhgap4/Pparg/Tmem201/Itga3/Hdac7/Lrp6/Map4k4/Pdxdc1/Sema6d/Anln/Pfn1/Nup188/Wnt11/Nanos1/Macf1/Hyal1/Pkn3/Pxn/Fgf2/Wnt5a/Adam17/Adam8/Srgap2/Ptp4a3/Syde1/Ager/Evl/Dab2ip/Synj2bp/Ppm1f/Rab13/Syne2/Nrp1/Acvr1b/Actr3/Ccbe1/Cenpv/Stc1/Kit/Serpine1/Sema7a/Sema6a	55
BP	GO:0032784	regulation of DNA-templated transcription, elongation	12/1856	49/21092	0.00088225	0.0381689	0.0321897	Dab2/Paf1/Eloc/Leo1/Supt4a/Hnrnpu/Hnrnpu/Zmynd11/Ccnt2/Cdk13/Ldb1/Ezh2	12
BP	GO:0061136	regulation of proteasomal protein catabolic process	28/1856	170/21092	0.000900849	0.0383568	0.0323481	Clec16a/Gpx1/Dab2/Pkd1/Nop53/Rpl11/Il33/Usp14/Csnk1a1/Hspa1a/Rnf40/March7/Psen2/Rack1/Psen1/Senp1/Dab2ip/Psmd14/Trib3/Usp13/Derl2/Hspa1b/Rnf144a/Sirt2/Clu/Rchy1/Psmf1/Map1a	28
BP	GO:0009313	oligosaccharide catabolic process	5/1856	10/21092	0.000906537	0.0383568	0.0323481	Ctbs/Pgghg/Neu3/Neu1/Man2c1	5
BP	GO:0198738	cell-cell signaling by wnt	57/1856	425/21092	0.00090659	0.0383568	0.0323481	Nfkb1/Mesp1/Dab2/Eda/Uty/Paf1/Gata3/Arntl/Grk5/Wif1/Jade1/Mdfic/Tsku/Fgfr2/Disc1/Hbp1/Itga3/Leo1/Lats2/Lrp6/Ndrg2/Aes/Wnt11/Macf1/Gid8/Csnk1a1/Med12/Fgf2/Sdc1/Csnk2a2/Wnt5a/Bcl9l/Fgfr3/Nphp3/Axin2/Tcf7l2/Psen1/Fzd6/Fzd6/Dab2ip/Aspm/Mark2/Mst1r/Col1a1/Mad2l2/Ctnnd1/Ctnnd1/Wnt2/Dact2/Limd1/Mllt3/Cd44/Abl2/Ldb1/Wnk1/Tmem170b/Chd8	57
BP	GO:1903364	positive regulation of cellular protein catabolic process	23/1856	130/21092	0.000930865	0.0389014	0.0328075	Dab2/Nop53/Disc1/Atpif1/Il33/Csnk1a1/Hspa1a/Rnf40/Psen2/Rack1/Fbxl5/Psen1/Dab2ip/Trib3/Sumo3/Ldlr/Usp13/Hspa1b/Rnf144a/Sirt2/Trim67/Clu/Rchy1	23
BP	GO:0032535	regulation of cellular component size	54/1856	398/21092	0.00093309	0.0389014	0.0328075	Eln/Cyfip1/Fn1/Fchsd2/Limk1/Tmem123/Sh3bp1/Ppp1r9a/Rb1cc1/Sema4c/Rapgef3/Disc1/Arhgap4/Bcl11a/Rptor/Shank3/Nck1/Adnp/Sptbn1/Sema6d/Pfn1/Shroom2/Pex11b/Atp13a2/Wnt5a/E2f4/Kirrel/Fgf13/Tmod4/Ist1/Mgll/Evl/Gmfg/Alox15/Rgma/Gmfb/Plxna3/Akt1s1/Eif2b2/P2rx7/Nrp1/Pex11a/Abi2/Ptprs/Anxa7/Kank3/Actr3/Rasa1/Cdc42ep4/Sema7a/Myo1c/Coro1a/Icam1/Sema6a	54
BP	GO:0090630	activation of GTPase activity	16/1856	77/21092	0.000941173	0.0389014	0.0328075	Tbc1d30/Tbc1d16/Tbc1d12/Sgsm1/Dock7/Wnt5a/Ntf3/Tbc1d5/Arhgap24/Tbc1d9/Sipa1l1/Rasgrp1/Rasa1/Ect2/Arhgap42/Usp6nl	16
BP	GO:0045444	fat cell differentiation	36/1856	238/21092	0.000946506	0.0389014	0.0328075	Runx1t1/Ttc8/Gpx1/Ncor2/Nr4a2/Nr4a3/Zfp36l1/Gata3/Arntl/Grk5/Wif1/Arid5b/Pparg/Lrp6/Cmklr1/Atat1/Arl4a/Itga6/Ctbp2/Wnt5a/Ift88/Hnrnpu/Hnrnpu/Tcf7l2/Ctbp1/Trib3/Uchl3/Sirt2/Prdm16/Ap1s2/Htr2a/Pex11a/Trim32/Eif2ak3/Fam57b/Zfp385a	36
BP	GO:0018209	peptidyl-serine modification	46/1856	326/21092	0.000954131	0.0389367	0.0328372	Eif4g1/Parp2/Nrxn1/Pkd1/Agt/Akap9/Snca/Galnt2/Bdkrb2/Rapgef3/Mapkapk3/Ikbkb/Phip/Lats2/Rptor/Nck1/Prkcq/Mast3/Mast3/Csnk1a1/Pkn3/Csnk2a2/Dock7/Wnt5a/Irgm2/Rassf2/Clk1/Dmpk/Ntf3/Rack1/Fnip1/Ppm1f/Mark2/Chuk/Mad2l2/Smg1/Mapkapk5/Eif2ak3/Cd44/Wnk1/Aurkb/Tbk1/Tnf/Bcar3/Sgk3/Vrk3	46
BP	GO:0090307	mitotic spindle assembly	14/1856	63/21092	0.000964497	0.0390825	0.0329602	Kif11/Kif11/Spice1/Kif4/Smc3/Abraxas2/Vps4b/Hspa1a/Hnrnpu/Hnrnpu/Stag2/Hspa1b/Map10/Aurkb	14
BP	GO:1902230	negative regulation of intrinsic apoptotic signaling pathway in response to DNA damage	8/1856	25/21092	0.000977975	0.0393515	0.0331871	Tmem161a/March7/Trim32/Cd74/Cd44/Clu/Bcl2l1/Zfp385a	8
BP	GO:0002262	myeloid cell homeostasis	28/1856	171/21092	0.000988693	0.0395065	0.0333178	Hoxa5/Tcf3/Mthfd1/Zfp36l1/Gata3/Slc11a2/Sfxn1/Prdx1/Atpif1/Dnase2a/Fancc/Fcgr2b/Adam17/Cited2/Slc37a4/Senp1/Bcl2l11/Ank1/Hba-a1/Prmt1/Mpl/Acvr1b/Setd1a/Cd44/Ldb1/Maea/Kit/Rps14	28
BP	GO:0061900	glial cell activation	10/1856	37/21092	0.00103343	0.0404984	0.0341543	Agt/Snca/Tlr4/Mmp8/Il33/Tlr3/Ager/Psen1/Ldlr/Clu	10
BP	GO:0001822	kidney development	40/1856	274/21092	0.00103463	0.0404984	0.0341543	Pkd1/Adamts1/Agt/Mef2c/Arg2/Gata3/Npnt/Eya1/Arid5b/Fgfr2/Dchs1/Itga3/Rara/Mpv17/Wnt11/Ednra/Myo1e/Fgf2/Nphp3/Ift88/Cys1/Dll1/Cux1/Col4a4/Flcn/Epha4/Cenpf/Pdgfra/Tns2/Gcnt1/Bcl2l11/Akr1b3/Ctnnd1/Ctnnd1/Ace/Nrp1/Dact2/Klf15/Cd44/Six1	40
BP	GO:0071902	positive regulation of protein serine/threonine kinase activity	40/1856	274/21092	0.00103463	0.0404984	0.0341543	Frs2/Itga1/Dab2/Nrxn1/Agt/Snca/Tlr4/Mdfic/Kras/Rptor/Lpar2/Iqgap1/Ccnd3/Ptpn1/Pxn/Fgf2/Trf/Ptprc/Wnt5a/Irgm2/Adam8/Ntf3/Ager/Psen1/Dab2ip/Epha4/Mst1r/Irak1/P2rx7/Pla2g1b/Htr2a/Mlkl/Cd74/Rasgrp1/Kit/Cdc6/Higd1a/Rapgef2/Tnf/Ezh2	40
BP	GO:0006909	phagocytosis	29/1856	180/21092	0.0010553	0.0410285	0.0346014	Trem2/Trem2/Sh3bp1/Tm9sf4/Pparg/Lepr/Rara/Itgal/Hspa8/Cd47/Rap1gap/Ptprc/Fcgr2b/Spon2/Mbl1/Spg11/Rack1/Ager/Sirpa/Alox15/Slamf1/Gulp1/P2rx7/Pld4/Pld4/Abl2/Syt7/Tnf/Coro1a	29
BP	GO:0050727	regulation of inflammatory response	45/1856	319/21092	0.00108262	0.041491	0.0349914	Il1rl2/S100a8/Nfkb1/Gpx1/Agt/Snca/Ppara/Tlr4/Gata3/Hyal2/Cr1l/Cd200/Pparg/Clcf1/Clcf1/Il1r2/Mmp8/Il20rb/Il33/Cnr2/Ednra/Tbc1d23/Calcrl/Cd47/Fcgr2b/Wnt5a/Tlr3/Adam8/Nt5e/Spn/Mgll/Ager/Sirpa/Ada/Serping1/Ldlr/Ace/Cd44/Gbp5/Serpine1/Sema7a/Gpsm3/Tnf/Sbno2/Usp18	45
BP	GO:0006898	receptor-mediated endocytosis	33/1856	214/21092	0.0010829	0.041491	0.0349914	Nsf/Arhgap27/Dab2/Magi2/Cap1/Ramp2/Snca/Clec9a/Lrp6/Fcho2/Calcrl/Pard3/Trf/Fcgr2b/Sh3gl2/Akap5/Hip1/Mkln1/Dll1/Ntf3/Tbc1d5/Snx17/Synj2bp/Ldlr/Fcho1/Plcg2/Sirt2/Atxn2/Ap2b1/Dnm3/Clu/Serpine1/Sgip1	33
BP	GO:0050731	positive regulation of peptidyl-tyrosine phosphorylation	30/1856	189/21092	0.00111691	0.041491	0.0349914	Bank1/Tcf3/Agt/Trem2/Trem2/Tlr4/Clcf1/Clcf1/Adnp/Iqgap1/Ptpn1/Ptprc/Adam17/Fgfr3/Parp9/Ntf3/Epha4/Pdgfra/Adra1a/Ctnnd1/Ctnnd1/Ace/Htr2a/Nrp1/Cd74/Cd44/Kit/Rasa1/Arhgef2/Icam1	30
BP	GO:0051383	kinetochore organization	7/1856	20/21092	0.00111998	0.041491	0.0349914	Cenph/Senp6/Cenpc1/Cenpa/Cenpw/Nuf2/Cenpe	7
BP	GO:1902254	negative regulation of intrinsic apoptotic signaling pathway by p53 class mediator	7/1856	20/21092	0.00111998	0.041491	0.0349914	Cep63/Bdkrb2/March7/Sh3glb1/Cd74/Cd44/Zfp385a	7
BP	GO:0030099	myeloid cell differentiation	53/1856	392/21092	0.00112043	0.041491	0.0349914	Gnas/Dab2/Hoxa5/Tcf3/Mef2c/Paf1/Zfp36l1/Trem2/Trem2/Gata3/Slc11a2/Pparg/Sfxn1/Leo1/Rara/Nbeal2/Atpif1/Dnase2a/Trf/Klf10/Eif6/Runx1/Rassf2/Fgfr3/Kat8/Adam8/Kat6a/Dll1/Psen2/Cited2/Psen1/Senp1/Nfatc1/Fasn/Ank1/Chuk/Hba-a1/Prmt1/Clec1b/Mpl/Prdm16/Acvr1b/Setd1a/Cd74/Ldb1/Gpr68/Maea/Kit/Rps14/Zfp385a/Tnf/Sbno2/Batf3	53
BP	GO:0000070	mitotic sister chromatid segregation	25/1856	148/21092	0.00114451	0.041491	0.0349914	Nusap1/Terf1/Anapc15/Atrx/Pds5b/Ncaph/Kif4/Klhl22/Dis3l2/Chmp6/Vps4b/Bub1/Anapc5/Hnrnpu/Hnrnpu/Cenpc1/Anapc4/Rrs1/Map10/Nuf2/Espl1/Akap8/Aurkb/Cdc6/Cenpe	25
BP	GO:0036445	neuronal stem cell division	6/1856	15/21092	0.00114699	0.041491	0.0349914	Fgfr2/Lrp6/Dock7/Fgf13/Aspm/Arhgef2	6
BP	GO:0051382	kinetochore assembly	6/1856	15/21092	0.00114699	0.041491	0.0349914	Cenph/Senp6/Cenpc1/Cenpa/Cenpw/Cenpe	6
BP	GO:0055057	neuroblast division	6/1856	15/21092	0.00114699	0.041491	0.0349914	Fgfr2/Lrp6/Dock7/Fgf13/Aspm/Arhgef2	6
BP	GO:0007088	regulation of mitotic nuclear division	29/1856	181/21092	0.00115328	0.041491	0.0349914	Sh2b1/Kif11/Kif11/Nusap1/Terf1/Anapc15/Atrx/Fgfr2/Phip/Klhl22/Smc3/Ccnd3/Mki67/Fbxw5/Vps4b/Hspa1a/Bub1/Fgfr3/Anapc5/Hnrnpu/Hnrnpu/Anapc4/Stag2/Hspa1b/Ccnjl/Aurkb/Cdc6/Tnf/Cenpe	29
BP	GO:0034599	cellular response to oxidative stress	38/1856	258/21092	0.00115373	0.041491	0.0349914	Vnn1/Gpx1/Nr4a2/Nr4a3/Bcar1/Snca/Tlr4/Arntl/Fabp1/Slc11a2/Coq7/Ncoa7/Prdx1/Mpv17/Srxn1/Atp13a2/Tmem161a/Fancc/Atp2a2/Rack1/Mgst1/Mtr/Foxp1/Htra2/Pdgfra/Akr1b3/Fut8/Chuk/Pcgf2/Gsr/Sirt2/Zfp622/Nqo1/Stk25/Fbxo7/Ect2/Tnf/Ezh2	38
BP	GO:0000082	G1/S transition of mitotic cell cycle	28/1856	173/21092	0.00118695	0.0420322	0.0354478	Eif4g1/Fhl1/Tcf3/Zc3h12d/Adamts1/Dgkz/Mepce/Jade1/Klf11/Lats2/Rptor/Ccnd3/Hyal1/Cdkn1a/Camk2g/Nacc2/E2f4/Rbm38/Nfatc1/Dbf4/Skp2/Skp2/Acvr1b/Tcf19/E2f6/Fbxo7/Ezh2/Cradd	28
BP	GO:0010977	negative regulation of neuron projection development	28/1856	173/21092	0.00118695	0.0420322	0.0354478	Dab2/Sema4c/Arhgap4/Bcl11a/Map4k4/Sema6d/Prkcsh/Wnt5a/Adam17/Fgf13/Il15ra/Psen1/Zfp365/Prag1/Epha4/Rgma/Plxna3/Xylt1/Nrp1/Dnm3/Ptprs/Actr3/Ngef/Syngap1/Sema7a/Rapgef2/Ube3a/Sema6a	28
BP	GO:0060070	canonical Wnt signaling pathway	40/1856	276/21092	0.00119069	0.0420322	0.0354478	Nfkb1/Mesp1/Dab2/Eda/Uty/Gata3/Arntl/Jade1/Fgfr2/Disc1/Lats2/Lrp6/Aes/Wnt11/Gid8/Csnk1a1/Med12/Fgf2/Sdc1/Wnt5a/Bcl9l/Fgfr3/Nphp3/Axin2/Tcf7l2/Psen1/Fzd6/Fzd6/Dab2ip/Aspm/Col1a1/Mad2l2/Ctnnd1/Ctnnd1/Wnt2/Limd1/Mllt3/Wnk1/Tmem170b/Chd8	40
BP	GO:0018108	peptidyl-tyrosine phosphorylation	44/1856	312/21092	0.00122854	0.0428597	0.0361457	Bank1/Tcf3/Agt/Trem2/Trem2/Tlr4/Hyal2/Fgfr2/Clcf1/Clcf1/Adnp/Chmp6/Iqgap1/Ptpn1/Pxn/Sh3bp5/Ptprc/Adam17/Clk1/Fgfr3/Parp9/Psen2/Ntf3/Psen1/Epha4/Pdgfra/Adra1a/Clk4/Errfi1/Aplp2/Ctnnd1/Ctnnd1/Ace/Htr2a/Nrp1/Abi2/Cd74/Cd44/Abl2/Kit/Rasa1/Arhgef2/Icam1/Blk	44
BP	GO:0007052	mitotic spindle organization	20/1856	109/21092	0.00122903	0.0428597	0.0361457	Kif11/Kif11/Spice1/Pkd1/Kif4/Smc3/Abraxas2/Vps4b/Hspa1a/Eml1/Hnrnpu/Hnrnpu/Parp3/Wdr62/Stag2/Hspa1b/Map10/Nuf2/Aurkb/Cenpe	20
BP	GO:0070373	negative regulation of ERK1 and ERK2 cascade	16/1856	79/21092	0.00125597	0.0431219	0.0363668	Rps6ka6/Rps6ka6/Dusp3/Dab2/Tlr4/Ndrg2/Ptpn1/Timp3/Ptprc/Sirpa/Flcn/Dab2ip/Synj2bp/Errfi1/Sema6a/Vrk3	16
BP	GO:0010639	negative regulation of organelle organization	53/1856	394/21092	0.00125701	0.0431219	0.0363668	Atad2/Atad2/Clec16a/Jarid2/Kdm4a/Kdm5a/Terf1/Gpx1/Tbc1d30/Ctc1/Snca/Anapc15/Mpv17l/Ppp1r9a/Atrx/Fgfr2/Trip12/Shank3/Klhl22/Dnmt1/Dlc1/Sptbn1/Camsap3/Pfn1/Ehmt2/Shroom2/Cdk10/Parl/Bub1/Fgfr3/Fgf13/Tmod4/Pax5/Hnrnpu/Hnrnpu/Evl/Flcn/Ctbp1/Htra2/Gmfg/Gmfb/Camsap1/Kdm4b/Smg6/Rtel1/Bcl2l1/Kank3/Aurkb/Arhgef2/Higd1a/Map1a/Cenpe/Coro1a	53
BP	GO:0071346	cellular response to interferon-gamma	21/1856	117/21092	0.00125903	0.0431219	0.0363668	Eprs/Actg1/Tlr4/Ccl6/Pparg/H2-Q7/Irgm2/Parp9/Ccl25/Evl/Rpl13a/Zyx/Stxbp4/Slc26a6/Slc26a6/Ccl21a/Kif16b/Actr3/Gbp5/Cdc42ep4/Myo1c	21
BP	GO:0043954	cellular component maintenance	13/1856	58/21092	0.00133064	0.0451612	0.0380866	Tanc1/Dgkz/Itga3/Camsap3/Shroom2/Hspa8/Supv3l1/Lnpk/Fcgr2b/Abl2/Syngap1/Rab3a/Rab3a	13
BP	GO:0007051	spindle organization	27/1856	166/21092	0.00133427	0.0451612	0.0380866	Kif11/Kif11/Spice1/Pkd1/Stard9/Atrx/Kif4/Smc3/Abraxas2/Vps4b/Hspa1a/Eml1/Senp6/Hnrnpu/Hnrnpu/Parp3/Wdr62/Aspm/Stag2/Chd3/Hspa1b/Map10/Nuf2/Espl1/Aurkb/Cenpe/Cenpj	27
BP	GO:0008608	attachment of spindle microtubules to kinetochore	9/1856	32/21092	0.00134436	0.0452364	0.0381501	Knl1/Abraxas2/Hnrnpu/Hnrnpu/Cenpc1/Sirt2/Nuf2/Ect2/Cenpe	9
BP	GO:0032640	tumor necrosis factor production	25/1856	150/21092	0.00139133	0.0462759	0.0390267	Cd34/Zbtb20/Clec4a2/H2-T23/Arg2/Tlr4/Rara/Mmp8/Tbc1d23/Cd47/Ncl/Ptprc/Wnt5a/Zfp64/Tlr3/Spon2/Spn/Sirpa/Slamf1/Errfi1/Azi2/Clu/Rasgrp1/Akap8/Arhgef2	25
BP	GO:1903555	regulation of tumor necrosis factor superfamily cytokine production	25/1856	150/21092	0.00139133	0.0462759	0.0390267	Cd34/Zbtb20/Clec4a2/H2-T23/Arg2/Tlr4/Rara/Mmp8/Tbc1d23/Cd47/Ncl/Ptprc/Wnt5a/Zfp64/Tlr3/Spon2/Adam8/Spn/Sirpa/Slamf1/Errfi1/Clu/Rasgrp1/Akap8/Arhgef2	25
BP	GO:0018212	peptidyl-tyrosine modification	44/1856	315/21092	0.0014894	0.049191	0.0414852	Bank1/Tcf3/Agt/Trem2/Trem2/Tlr4/Hyal2/Fgfr2/Clcf1/Clcf1/Adnp/Chmp6/Iqgap1/Ptpn1/Pxn/Sh3bp5/Ptprc/Adam17/Clk1/Fgfr3/Parp9/Psen2/Ntf3/Psen1/Epha4/Pdgfra/Adra1a/Clk4/Errfi1/Aplp2/Ctnnd1/Ctnnd1/Ace/Htr2a/Nrp1/Abi2/Cd74/Cd44/Abl2/Kit/Rasa1/Arhgef2/Icam1/Blk	44
BP	GO:0006473	protein acetylation	29/1856	184/21092	0.00149608	0.049191	0.0414852	Tcf3/Snca/Gata3/Arntl/Jade1/Rapgef3/Naa16/Atat1/Nupr1/Kat8/Yeats2/Kat6a/Nfe2/Ing3/Naa60/Hcfc1/Flcn/Ctbp1/Setd5/Mbd3/Pcgf2/Msl1/Jade2/Epc1/Klf15/Ldb1/Fam161a/Msl3/Trrap	29
BP	GO:0061097	regulation of protein tyrosine kinase activity	15/1856	73/21092	0.00151109	0.0494024	0.0416635	Tcf3/Agt/Hyal2/Chmp6/Ptpn1/Sh3bp5/Ptprc/Adam17/Psen2/Psen1/Epha4/Adra1a/Errfi1/Aplp2/Ace	15
BP	GO:0010958	regulation of amino acid import across plasma membrane	5/1856	11/21092	0.0015418	0.0496572	0.0418784	Agt/Sept2/Sept2/Psen1/Tnf	5
BP	GO:0099558	maintenance of synapse structure	5/1856	11/21092	0.0015418	0.0496572	0.0418784	Dgkz/Hspa8/Syngap1/Rab3a/Rab3a	5
BP	GO:0048144	fibroblast proliferation	20/1856	111/21092	0.00154727	0.0496572	0.0418784	Ctc1/Fn1/Agt/Pparg/Ednra/Cdkn1a/Kmt2c/Fbrs/Wnt5a/Nupr1/Ager/Dab2ip/Pdgfra/Pla2g1b/Wnt2/Trim32/Cd74/Rasa1/Serpine1/Cdc6	20
BP	GO:1901673	regulation of mitotic spindle assembly	7/1856	21/21092	0.00155341	0.0496572	0.0418784	Smc3/Vps4b/Hspa1a/Hnrnpu/Hnrnpu/Stag2/Hspa1b	7
CC	GO:0001650	fibrillar center	33/1892	131/21298	2.77333e-08	1.99125e-05	1.59394e-05	Rps6ka6/Rps6ka6/Imp4/Kdm4a/Terf1/Dab2/Samd4/Ino80c/Zfp385b/Kdm5d/Hoxb5/Ip6k1/Nop53/Leo1/Ipo11/Taf1c/Herc4/Tcof1/Nop58/Ncl/Ddx11/Mtdh/Chd1/Orc6/Pax5/Ager/Mri1/Map3k14/Malt1/Rrs1/Snrpb2/Aff4/Rnmt	33
CC	GO:0005912	adherens junction	52/1892	284/21298	3.99497e-07	0.000126963	0.00010163	Frs2/Frmd4b/Pianp/Ddx6/Itga1/Git1/Bcar1/Limk1/Sh3bp1/Wtip/Klf11/Pkp4/Dlc1/Map4k4/Lpp/Iqgap1/Camsap3/Parva/Shroom2/Dst/Pard3/Myo1e/Pxn/Sorbs1/Itga6/Ptprc/Des/Adam17/Rsu1/Dll1/Atp2a2/Keap1/Evl/Rexo2/Zfp384/Senp1/Prag1/Zyx/Tns2/Lims2/Focad/Xirp2/Syne2/Arhgap24/Ctnnd1/Ctnnd1/Nrp1/Limd1/Abi2/Actr3/Cdc42ep4/Misp	52
CC	GO:0030055	cell-substrate junction	35/1892	161/21298	5.30486e-07	0.000126963	0.00010163	Itga1/Git1/Bcar1/Limk1/Klf11/Dlc1/Map4k4/Lpp/Iqgap1/Parva/Dst/Pxn/Sorbs1/Col17a1/Itga6/Ptprc/Adam17/Rsu1/Keap1/Evl/Rexo2/Zfp384/Senp1/Prag1/Zyx/Tns2/Lims2/Focad/Xirp2/Syne2/Arhgap24/Nrp1/Limd1/Actr3/Misp	35
CC	GO:0000775	chromosome, centromeric region	39/1892	193/21298	8.89185e-07	0.000159609	0.000127762	Knl1/Kdm4a/Atrx/Sept2/Sept2/Nde1/Ska3/Trp53bp1/Dnmt1/Smc3/Daxx/Mki67/Csnk1a1/Bub1/Rassf2/Suv39h1/Kat8/Cenph/Psen2/Kmt5b/Hnrnpu/Hnrnpu/Cenpc1/Psen1/Cenpf/Stag2/Cenpa/Kdm4b/Cenpw/Nuf2/Kmt5c/Rec8/Cenpb/Kntc1/Cenpv/Spout1/Aurkb/Cenpe/Dync1li2	39
CC	GO:0034708	methyltransferase complex	28/1892	120/21298	1.62127e-06	0.000180021	0.000144102	Jarid2/Kdm4a/Kdm5a/Uty/Ino80c/Kdm5d/Ash2l/Snrpb/Cbll1/Riok1/Kmt2c/Kdm5c/Zfp91/Zfp64/Kat8/Hcfc1/Mettl1/Rbbp7/Kdm4b/Prmt1/Setd1a/Trmt61a/Men1/Men1/E2f6/Chd8/Ezh2/Rnmt	28
CC	GO:0044452	nucleolar part	37/1892	183/21298	1.65384e-06	0.000180021	0.000144102	Rps6ka6/Rps6ka6/Imp4/Kdm4a/Terf1/Dab2/Samd4/Ino80c/Zfp385b/Kdm5d/Hoxb5/Ip6k1/Nop53/Polr1c/Leo1/Ipo11/Taf1c/Herc4/Tcof1/Nop58/Ncl/Ddx11/Mtdh/Chd1/Orc6/Tbp/Znrd1/Pax5/Ager/Mri1/Map3k14/Malt1/Rrs1/Snrpb2/Aff4/Rnmt/Gar1	37
CC	GO:0005925	focal adhesion	32/1892	148/21298	1.81447e-06	0.000180021	0.000144102	Itga1/Git1/Bcar1/Limk1/Klf11/Dlc1/Map4k4/Lpp/Iqgap1/Parva/Dst/Pxn/Sorbs1/Ptprc/Adam17/Rsu1/Keap1/Evl/Rexo2/Zfp384/Senp1/Prag1/Zyx/Tns2/Lims2/Focad/Xirp2/Syne2/Arhgap24/Nrp1/Limd1/Misp	32
CC	GO:0070161	anchoring junction	52/1892	299/21298	2.00581e-06	0.000180021	0.000144102	Frs2/Frmd4b/Pianp/Ddx6/Itga1/Git1/Bcar1/Limk1/Sh3bp1/Wtip/Klf11/Pkp4/Dlc1/Map4k4/Lpp/Iqgap1/Camsap3/Parva/Shroom2/Dst/Pard3/Myo1e/Pxn/Sorbs1/Itga6/Ptprc/Des/Adam17/Rsu1/Dll1/Atp2a2/Keap1/Evl/Rexo2/Zfp384/Senp1/Prag1/Zyx/Tns2/Lims2/Focad/Xirp2/Syne2/Arhgap24/Ctnnd1/Ctnnd1/Nrp1/Limd1/Abi2/Actr3/Cdc42ep4/Misp	52
CC	GO:0005924	cell-substrate adherens junction	32/1892	154/21298	4.45014e-06	0.0003477	0.000278323	Itga1/Git1/Bcar1/Limk1/Klf11/Dlc1/Map4k4/Lpp/Iqgap1/Parva/Dst/Pxn/Sorbs1/Ptprc/Adam17/Rsu1/Keap1/Evl/Rexo2/Zfp384/Senp1/Prag1/Zyx/Tns2/Lims2/Focad/Xirp2/Syne2/Arhgap24/Nrp1/Limd1/Misp	32
CC	GO:0005819	spindle	47/1892	268/21298	4.84262e-06	0.0003477	0.000278323	Jtb/Kif11/Kif11/Iqcb1/Nusap1/Terf1/Spice1/Sept2/Sept2/Nde1/Tmem201/Ska3/Lats2/Pkp4/Klhl22/Smc3/Cep95/Abraxas2/Rps6ka1/Pard3/Vps4b/Atat1/Ddx11/Eml1/Yeats2/Hnrnpu/Hnrnpu/Wdr62/Cenpf/Aspm/Stag2/Sirt2/Mad2l2/Map10/Poc1b/Prc1/Espl1/Kntc1/Cenpv/Spout1/Maea/Fam161a/Aurkb/Ect2/Cdc6/Cenpe/Topors	47
CC	GO:0098687	chromosomal region	51/1892	302/21298	5.96575e-06	0.000389401	0.000311703	Knl1/Kdm4a/Terf1/Ctc1/Atrx/Sept2/Sept2/Nde1/Rad17/Ska3/Trp53bp1/Dnmt1/Smc3/Daxx/Dna2/Mki67/Csnk1a1/Bub1/Rassf2/Dclre1b/Suv39h1/Kat8/Cenph/Psen2/Kmt5b/Hnrnpu/Hnrnpu/Cenpc1/Psen1/Cenpf/Stag2/Cenpa/Scmh1/Kdm4b/Cenpw/Smc6/Smg6/Rtel1/Nuf2/Kmt5c/Rec8/Cenpb/Men1/Men1/Kntc1/Cenpv/Spout1/Aurkb/Cenpe/Dync1li2/Nabp1	51
CC	GO:0000780	condensed nuclear chromosome, centromeric region	11/1892	28/21298	1.3625e-05	0.00081523	0.000652567	Atrx/Bub1/Kmt5b/Cenpc1/Cenpa/Nuf2/Kmt5c/Rec8/Cenpb/Aurkb/Cenpe	11
CC	GO:0030496	midbody	29/1892	141/21298	1.50567e-05	0.000831592	0.000665664	Jtb/Sept2/Sept2/Kif4/Pkp4/Iqgap1/Anln/Abraxas2/Vps4b/Ddx11/Sh3glb1/Ist1/Keap1/Hnrnpu/Hnrnpu/Cenpc1/Rack1/Flcn/Cenpf/Aspm/Sirt2/Ctnnd1/Ctnnd1/Map10/Txndc9/Prc1/Aurkb/Ect2/Cenpe	29
CC	GO:0005874	microtubule	64/1892	425/21298	2.02259e-05	0.000949045	0.000759681	Kif11/Kif11/Dcdc2b/Nusap1/Map1s/Tubd1/Cep57l1/Lrpprc/Cep170b/Cep170b/Ttll5/Stard9/Sept2/Sept2/Nde1/Disc1/Kif4/Arhgap4/Ska3/Hook1/Klhl22/Daxx/Klc2/Stau2/Iqgap1/Camsap3/Kif3c/Abraxas2/Shroom2/Macf1/Dst/Tubb4b/Atat1/Hspa8/Radil/Nckap5/Kif21b/Fgf13/Eml1/Hnrnpu/Hnrnpu/Cfap20/Dnaic1/Aspm/Bcl2l11/Camsap1/Eml3/Sirt2/Map10/Dnm3/Ttll9/Prc1/Kif16b/Kntc1/Fam161a/Aurkb/Myo5a/Arhgef2/Dnal1/Map1a/Cenpe/Cenpj/Ra…	64
CC	GO:0036064	ciliary basal body	28/1892	136/21298	2.05635e-05	0.000949045	0.000759681	Ttc8/Tbc1d30/Cfap157/Akap9/Tapt1/Jade1/C2cd3/Disc1/Intu/Intu/Cdk10/Csnk1a1/Ift88/Cys1/Psen2/Cfap20/B9d2/Spata7/Cenpf/Bbof1/Poc1b/Fam161a/Cep290/Armc9/Rpgr/Agbl2/Topors/Cenpj	28
CC	GO:0000151	ubiquitin ligase complex	46/1892	275/21298	2.14271e-05	0.000949045	0.000759681	Dcaf12/Depdc5/Phc1/Babam2/Ube2d2a/Skp1a/Zer1/Anapc15/Eloc/Klhl22/Lrrc29/Siah1a/Dtl/Fbxw5/Gid8/Med12/Hspa1a/Hspa8/Cdk8/Dcun1d2/Fbxl12/Rnf40/Mkln1/Anapc5/Keap1/Fbxl5/Amn1/Fbxl2/Anapc4/Ubr3/Ubr1/Pcgf2/Rnf144a/Skp2/Skp2/Mad2l2/Ube2d3/Fbxl3/Pcgf1/Rnf20/Cul2/Rchy1/Maea/Dmac2/Fbxo7/Topors	46
CC	GO:0005938	cell cortex	49/1892	300/21298	2.24704e-05	0.000949045	0.000759681	Dcdc2b/Llgl2/Spink5/Cap1/Snca/Sh3bp1/Fabp1/Ppp1r9a/Sept2/Sept2/Rapgef3/Tnfaip2/Fgfr2/Exoc1/Tmem201/Epb41/Daxx/Dlc1/Myl12a/Sptbn1/Fryl/Cytip/Anln/Pfn1/Shroom2/Macf1/Pard3/Myo1e/Ncl/Ctbp2/Gck/Hip1/Mkln1/Psen2/Gpsm1/Mpp1/Actn4/Psen1/Ctbp1/Mark2/Ank1/Ctnnd1/Ctnnd1/Med28/Sept3/Maea/Exoc2/Coro1a/Zhx3	49
CC	GO:0016363	nuclear matrix	21/1892	89/21298	2.62067e-05	0.00104536	0.000836776	Runx1t1/Prpf40a/Ncor2/Matr3/Gmcl1/Smc3/Sorbs1/Alox5/Lmnb1/Kat8/Hnrnpu/Hnrnpu/Cenpf/Stag2/Sf3b1/Srrm1/Men1/Men1/Akap8/Maea/Mat1a	21
CC	GO:0000790	nuclear chromatin	60/1892	397/21298	3.25296e-05	0.00122928	0.000983998	Hmgxb4/Appl2/Phc1/Ncor2/Ncoa3/Gatad2a/Tcf3/Klhdc3/Mef2c/Gata3/Ino80c/Ttc21b/Atrx/Rad17/Zfp143/Ash2l/Prdx1/Rara/Smarca2/Ehmt2/Ddx11/Nacc2/E2f4/Suv39h1/Kat8/Kat6a/Tbp/Cpsf6/Ing3/Cited2/Hist1h2ah/Cenpc1/Tcf7l2/Hist2h3c2/Nfatc1/Mbd3/Chd3/Cenpa/Kdm2a/Rbbp7/Pcgf2/Kdm4b/Sirt2/Mef2a/Setd1a/Ipo4/Cdk13/Dpf2/Kmt5c/Ldb1/Cenpb/Men1/Men1/Mcmbp/Akap8/Mxd1/Hist1h3i/Zfp385a/Ezh2/Trrap	60
CC	GO:0034399	nuclear periphery	25/1892	120/21298	4.54223e-05	0.00163066	0.00130529	Runx1t1/Prpf40a/Ncor2/Matr3/Gmcl1/Smc3/Sorbs1/Alox5/Eif6/Lmnb1/Kat8/Hnrnpu/Hnrnpu/Cenpf/Anapc4/Stag2/Sf3b1/Srrm1/Lbr/Ipo4/Men1/Men1/Akap8/Maea/Mat1a	25
CC	GO:0000776	kinetochore	27/1892	135/21298	4.89582e-05	0.0016739	0.00133991	Knl1/Sept2/Sept2/Nde1/Ska3/Trp53bp1/Csnk1a1/Bub1/Rassf2/Kat8/Cenph/Psen2/Hnrnpu/Hnrnpu/Cenpc1/Psen1/Cenpf/Cenpa/Cenpw/Nuf2/Rec8/Kntc1/Cenpv/Spout1/Aurkb/Cenpe/Dync1li2	27
CC	GO:0000779	condensed chromosome, centromeric region	14/1892	49/21298	6.21709e-05	0.00202903	0.00162418	Knl1/Atrx/Ska3/Bub1/Kmt5b/Cenpc1/Cenpf/Cenpa/Nuf2/Kmt5c/Rec8/Cenpb/Aurkb/Cenpe	14
CC	GO:0035097	histone methyltransferase complex	21/1892	95/21298	7.3245e-05	0.00228652	0.00183029	Jarid2/Kdm4a/Kdm5a/Uty/Ino80c/Kdm5d/Ash2l/Kmt2c/Kdm5c/Zfp91/Zfp64/Kat8/Hcfc1/Rbbp7/Kdm4b/Setd1a/Men1/Men1/E2f6/Chd8/Ezh2	21
CC	GO:0030139	endocytic vesicle	31/1892	169/21298	8.00245e-05	0.00239406	0.00191638	Actg1/Nrxn1/Hyal2/Rapgef6/Lpar2/Fcho2/A830010M20Rik/Myo1e/Trf/Heatr5a/Hip1/Adam8/Srgap2/Tbc1d5/Evl/Dab2ip/Zyx/Slamf1/Rab13/Fcho1/Stxbp4/Rab24/Pld4/Pld4/Kif16b/Cdc42ep4/Syt7/Myo1c/Rapgef2/Coro1a/Sgip1	31
CC	GO:0072686	mitotic spindle	22/1892	103/21298	8.60561e-05	0.00247153	0.00197839	Kif11/Kif11/Iqcb1/Nusap1/Pkp4/Klhl22/Smc3/Atat1/Eml1/Yeats2/Hnrnpu/Hnrnpu/Aspm/Stag2/Sirt2/Map10/Espl1/Spout1/Fam161a/Aurkb/Ect2/Cenpe	22
CC	GO:0000922	spindle pole	25/1892	125/21298	9.1668e-05	0.00253145	0.00202635	Kif11/Kif11/Nde1/Tmem201/Lats2/Pkp4/Klhl22/Smc3/Cep95/Abraxas2/Vps4b/Ddx11/Eml1/Wdr62/Cenpf/Aspm/Stag2/Map10/Poc1b/Kntc1/Spout1/Fam161a/Aurkb/Cdc6/Topors	25
CC	GO:0044448	cell cortex part	34/1892	195/21298	0.000105932	0.00281701	0.00225493	Dcdc2b/Llgl2/Cap1/Sh3bp1/Fabp1/Ppp1r9a/Sept2/Sept2/Rapgef3/Tnfaip2/Exoc1/Tmem201/Epb41/Dlc1/Myl12a/Sptbn1/Anln/Shroom2/Myo1e/Ctbp2/Gck/Hip1/Mpp1/Actn4/Ctbp1/Mark2/Ank1/Ctnnd1/Ctnnd1/Med28/Sept3/Maea/Exoc2/Coro1a	34
CC	GO:0098562	cytoplasmic side of membrane	31/1892	177/21298	0.00019228	0.00493061	0.0039468	Gnas/Snx5/Kras/Exoc1/Ikbkb/Pkp4/Shank3/Epb41/Iqgap1/Ptpn1/Cnr2/Dst/Ptprc/Akap5/Fgfr3/Ptpn4/Hip1/Atp2a2/Rasal3/Atp2c2/Prmt8/Htra2/Alox15/Errfi1/Ank1/Chuk/Sppl3/S100a6/Kit/Ptpn7/Blk	31
CC	GO:0016607	nuclear speck	47/1892	311/21298	0.000222052	0.00547118	0.00437951	Prpf40a/Grcc10/Rexo4/Nr4a2/Tcf3/Mef2c/Limk1/Grk5/Phf7/Dgkz/Gtf2e2/Cygb/Jade1/Hbp1/Trip12/Aff2/Cbll1/Thrap3/Ppp1r16b/Srsf5/Ehmt2/Rp9/Hif3a/Csnk1a1/Hspa1a/Acin1/Nsrp1/Sdcbp2/Ifi204/Rbm39/Kat6a/Cpsf6/Mpp1/Hnrnpu/Hnrnpu/Pum1/Pum1/Sf3b1/Rmi2/Setd1a/Cdk13/Snrpb2/Ylpm1/Cdc34/Tatdn2/Topors/U2af2	47
CC	GO:0015629	actin cytoskeleton	65/1892	470/21298	0.000228601	0.00547118	0.00437951	Actg1/Ablim2/Dcdc2b/Llgl2/Bcar1/Cap1/Ablim1/Snca/Fkbp15/Ppp1r9a/Sept2/Sept2/Rapgef3/Pknox2/Rara/Epb41/Dlc1/Limch1/Myl12a/Sptbn1/Iqgap1/Anln/Parva/Myo10/Shroom2/Macf1/Dst/Myo1e/Pxn/Sorbs1/Pou6f1/Rflnb/Ttc17/Ccdc102a/Gck/Adam17/Gdpd2/Kptn/Hip1/Adam8/Tmod4/Keap1/Actn4/Zyx/Mark2/Mst1r/Ttn/Xirp2/Smtnl2/Med28/Trim32/Sra1/Abi2/Abl2/Actr3/Kntc1/Cryab/Fermt3/Maea/Cdc42ep4/Myo5a/Arhgef2/Klhl14/Myo1c/Coro1a	65
CC	GO:0005721	pericentric heterochromatin	8/1892	22/21298	0.0003919	0.0090769	0.00726578	Kdm4a/Atrx/Dnmt1/Cenpc1/Cenpa/Kdm4b/Kmt5c/Cenpb	8
CC	GO:0009898	cytoplasmic side of plasma membrane	28/1892	162/21298	0.000477742	0.0104207	0.00834149	Gnas/Snx5/Kras/Exoc1/Ikbkb/Pkp4/Shank3/Epb41/Iqgap1/Cnr2/Dst/Ptprc/Akap5/Fgfr3/Ptpn4/Hip1/Atp2a2/Atp2c2/Prmt8/Htra2/Alox15/Errfi1/Ank1/Chuk/S100a6/Kit/Ptpn7/Blk	28
CC	GO:0030662	coated vesicle membrane	16/1892	72/21298	0.000478948	0.0104207	0.00834149	Sec16a/Sec16b/Cope/Dab2/Fcho2/Sec24c/A830010M20Rik/Trf/Arcn1/Hip1/Sec23b/Tbc1d5/Fcho1/Copb1/Synrg/Sgip1	16
CC	GO:0005876	spindle microtubule	13/1892	53/21298	0.000587557	0.0124078	0.00993207	Kif11/Kif11/Nusap1/Sept2/Sept2/Ska3/Klhl22/Hnrnpu/Hnrnpu/Kntc1/Fam161a/Aurkb/Cenpe	13
CC	GO:0099568	cytoplasmic region	62/1892	460/21298	0.000622265	0.0127653	0.0102182	Dcdc2b/Llgl2/Spink5/Cap1/Snca/Sh3bp1/Fabp1/Ppp1r9a/Tctex1d4/Sept2/Sept2/Rapgef3/Tnfaip2/Fgfr2/Ap3m2/Exoc1/Tmem201/Epb41/Daxx/Dlc1/Myl12a/Sptbn1/Fryl/Cytip/Anln/Pfn1/Kif3c/Shroom2/Macf1/Ccdc114/Pard3/Myo1e/Ncl/Trak1/Ctbp2/Gck/Hip1/Ift88/Cys1/Mkln1/Psen2/Gpsm1/Mpp1/Actn4/Psen1/Dnaic1/Ctbp1/Spata7/Cenpf/Mark2/Ada/Akr1b3/Ank1/Ctnnd1/Ctnnd1/Med28/Sept3/Maea/Exoc2/Dnal1/Coro1a/Zhx3	62
CC	GO:0030120	vesicle coat	13/1892	54/21298	0.000711753	0.0141955	0.0113631	Cope/Fcho2/Sec24c/A830010M20Rik/Trf/Arcn1/Hip1/Sec23b/Tbc1d5/Fcho1/Copb1/Synrg/Sgip1	13
CC	GO:0030122	AP-2 adaptor complex	6/1892	14/21298	0.000782154	0.015178	0.0121495	Fcho2/A830010M20Rik/Hip1/Tbc1d5/Fcho1/Sgip1	6
CC	GO:0000792	heterochromatin	18/1892	92/21298	0.00109773	0.0201376	0.0161195	Kdm4a/Phc1/Ddx6/Atrx/Nop53/Dnmt1/Daxx/Rnf40/Suv39h1/Cenpc1/Mbd3/Cenpa/Pcgf2/Kdm4b/Sirt2/Kmt5c/Cenpb/Rnf20	18
CC	GO:0030131	clathrin adaptor complex	9/1892	31/21298	0.00112083	0.0201376	0.0161195	Ap3m2/Fcho2/A830010M20Rik/Hip1/Tbc1d5/Fcho1/Ap2b1/Ap3b1/Sgip1	9
CC	GO:0030132	clathrin coat of coated pit	7/1892	20/21298	0.00118503	0.0201376	0.0161195	Dab2/Fcho2/A830010M20Rik/Hip1/Tbc1d5/Fcho1/Sgip1	7
CC	GO:0000778	condensed nuclear chromosome kinetochore	6/1892	15/21298	0.00120601	0.0201376	0.0161195	Bub1/Cenpc1/Cenpa/Nuf2/Rec8/Cenpe	6
CC	GO:0030128	clathrin coat of endocytic vesicle	6/1892	15/21298	0.00120601	0.0201376	0.0161195	Fcho2/A830010M20Rik/Hip1/Tbc1d5/Fcho1/Sgip1	6
CC	GO:1990023	mitotic spindle midzone	6/1892	15/21298	0.00120601	0.0201376	0.0161195	Eml1/Hnrnpu/Hnrnpu/Map10/Aurkb/Cenpe	6
CC	GO:0005789	endoplasmic reticulum membrane	63/1892	482/21298	0.00123993	0.0202334	0.0161962	Sgms1/Fkbp8/Pigp/Tmbim6/Eda/Spink5/Tapt1/Itpr1/Tmem258/Pomt1/Pemt/Tor1a/Pigx/Rtn1/Rab33b/Lmf2/Rpn2/Hmgcr/Ptpn1/Rp9/Fkbp1a/Dst/Stt3b/Dhcr7/Sptssa/Slc16a11/Mtdh/Lnpk/Spcs1/Irgm2/Dmpk/Lrmp/Cept1/Gpsm1/Atp2a2/Slc37a4/Saraf/Yif1b/Apoo/Sgms2/Sgms2/Ankle2/Emc8/Derl2/Rnf5/Sppl3/Cyb5r3/Ergic3/Fkbp1b/Slc35b3/Erlin1/Pigo/Gdpd3/Eif2ak3/Pign/Anxa7/Bcap29/Cyp2e1/Pigb/Gpaa1/Dpagt1/Tusc3/Elovl1	63
CC	GO:0030118	clathrin coat	12/1892	51/21298	0.0013984	0.0223123	0.0178603	Dab2/Ap3m2/Fcho2/A830010M20Rik/Kcnq5/Hip1/Tbc1d5/Fcho1/Ap2b1/Synrg/Ap3b1/Sgip1	12
CC	GO:0030117	membrane coat	19/1892	102/21298	0.00149439	0.022372	0.0179081	Cope/Dab2/Ap3m2/Fcho2/Sec24c/A830010M20Rik/Kcnq5/Trf/Arcn1/Hip1/Sec23b/Tbc1d5/Fcho1/Copb1/Ap1s2/Ap2b1/Synrg/Ap3b1/Sgip1	19
CC	GO:0048475	coated membrane	19/1892	102/21298	0.00149439	0.022372	0.0179081	Cope/Dab2/Ap3m2/Fcho2/Sec24c/A830010M20Rik/Kcnq5/Trf/Arcn1/Hip1/Sec23b/Tbc1d5/Fcho1/Copb1/Ap1s2/Ap2b1/Synrg/Ap3b1/Sgip1	19
CC	GO:0098827	endoplasmic reticulum subcompartment	64/1892	495/21298	0.00149562	0.022372	0.0179081	Sgms1/Fkbp8/Pigp/Tmbim6/Eda/Spink5/Tapt1/Itpr1/Tmem258/Pomt1/Pemt/Tor1a/Pigx/Tmem201/Rtn1/Rab33b/Lmf2/Rpn2/Hmgcr/Ptpn1/Rp9/Fkbp1a/Dst/Stt3b/Dhcr7/Sptssa/Slc16a11/Mtdh/Lnpk/Spcs1/Irgm2/Dmpk/Lrmp/Cept1/Gpsm1/Atp2a2/Slc37a4/Saraf/Yif1b/Apoo/Sgms2/Sgms2/Ankle2/Emc8/Derl2/Rnf5/Sppl3/Cyb5r3/Ergic3/Fkbp1b/Slc35b3/Erlin1/Pigo/Gdpd3/Eif2ak3/Pign/Anxa7/Bcap29/Cyp2e1/Pigb/Gpaa1/Dpagt1/Tusc3/Elovl1	64
CC	GO:0030669	clathrin-coated endocytic vesicle membrane	6/1892	16/21298	0.00178546	0.0261625	0.0209423	Fcho2/A830010M20Rik/Hip1/Tbc1d5/Fcho1/Sgip1	6
CC	GO:0000777	condensed chromosome kinetochore	9/1892	33/21298	0.00182323	0.0261816	0.0209576	Knl1/Ska3/Bub1/Cenpc1/Cenpf/Cenpa/Nuf2/Rec8/Cenpe	9
CC	GO:0016235	aggresome	10/1892	40/21298	0.00211757	0.0298121	0.0238637	Prkcq/Hspa1a/Psen1/Sergef/Syne2/Prdm16/Clu/Klhl14/Eef2/Tbk1	10
CC	GO:0043198	dendritic shaft	14/1892	68/21298	0.00229486	0.0316867	0.0253642	Nsf/Hcn2/Gria3/Stau2/Hspa8/Kirrel/Akap5/Psen1/Epha4/Nlgn2/Htr2a/Syngap1/Arhgef2/Map1a	14
CC	GO:0005905	clathrin-coated pit	13/1892	61/21298	0.00235214	0.0318649	0.0255068	Dab2/Fcho2/A830010M20Rik/Atat1/Trf/Hip1/Tbc1d5/Ldlr/Fcho1/Ap1s2/Ap2b1/Bcl2l1/Sgip1	13
CC	GO:0051233	spindle midzone	9/1892	35/21298	0.0028394	0.0372158	0.0297901	Pkp4/Eml1/Hnrnpu/Hnrnpu/Map10/Cenpv/Aurkb/Cdc6/Cenpe	9
CC	GO:0061695	transferase complex, transferring phosphorus-containing groups	36/1892	251/21298	0.00285079	0.0372158	0.0297901	Polr3b/Rprd2/Paf1/Rb1cc1/Gtf2e2/Polr1c/Papss1/Leo1/Ikbkb/Dna2/Ccnd3/Cdkn1a/Sorbs1/Polr3f/Prkab1/Atg13/Taf2/Tbp/Znrd1/Phka1/Tbc1d5/Setd5/Ercc3/Chuk/Polr3e/Ccnt2/Pfkfb1/Mad2l2/Ccnjl/Acvr1b/Cdk13/Vac14/Taf3/Rpap2/Trrap/Phka2	36
CC	GO:0030027	lamellipodium	26/1892	165/21298	0.0029107	0.0373193	0.029873	Cyfip1/Bcar1/Limk1/Ablim1/Sh3bp1/Dgkz/Ppp1r9a/Antxr1/Rapgef3/Parva/Myo10/Pxn/Fat1/Gdpd2/Kptn/Srgap2/Evl/Rab13/Syne2/Ctnnd1/Ctnnd1/Abi2/Cd44/Abl2/Actr3/Coro1a	26
CC	GO:0044431	Golgi apparatus part	61/1892	481/21298	0.0029783	0.0375161	0.0300305	Limk2/Unc50/Nsf/Tmem230/Plekhj1/Gnas/Sgms1/Golph3l/Cope/Pomgnt1/Akap9/Hyal2/Galnt2/Slc11a2/Atp11a/Rab33b/Mbtps1/Trappc6b/B3gat3/Tbc1d23/Man2a2/H2-Q7/Irgm2/Pqlc1/Arcn1/Ift88/Fut10/Gpsm1/Cux1/Yif1b/Naa60/Kdelr1/Atp2c2/Apoo/Nsg1/Sgms2/Sgms2/Gcnt1/Rab13/Xylt1/Fut8/Copb1/Ergic3/Atxn2/Coro7/Slc35b3/Slc35a4/Stx16/Syt17/Man1a/Synrg/Atp8a1/Pld4/Pld4/Arl5b/Cyp2e1/Actr3/Tmbim4/Vps52/Stk25/Ap3b1	61
CC	GO:0030864	cortical actin cytoskeleton	16/1892	85/21298	0.00305353	0.0378006	0.0302582	Dcdc2b/Llgl2/Cap1/Ppp1r9a/Sept2/Sept2/Rapgef3/Dlc1/Sptbn1/Anln/Shroom2/Myo1e/Hip1/Med28/Maea/Coro1a	16
CC	GO:0030863	cortical cytoskeleton	20/1892	119/21298	0.00401846	0.0489026	0.0391451	Dcdc2b/Llgl2/Cap1/Ppp1r9a/Sept2/Sept2/Rapgef3/Epb41/Dlc1/Sptbn1/Anln/Shroom2/Myo1e/Hip1/Mpp1/Actn4/Ank1/Med28/Maea/Coro1a	20
MF	GO:0060589	nucleoside-triphosphatase regulator activity	56/1852	296/20759	5.27044e-08	5.47072e-05	4.83216e-05	Depdc5/Sil1/Elmod3/Arhgap27/Prex2/Pde6d/Llgl2/Git1/Tbc1d30/Sh3bp1/Rabep2/Ncaph/Bag1/Agap1/Tbc1d16/Arhgap4/Arhgap22/Dlc1/Tbc1d12/Sgsm1/Acap3/Atpif1/Pfn1/Smap2/Wnt11/Rap1gap/Tor1aip1/Srgap2/Syde1/Sec23b/Gpsm1/Tbc1d5/Rasal3/Dab2ip/Fnip1/Dnajc19/Rgs3/Rgs9/Pgam5/Arhgap45/Arhgap24/Tbc1d9/Als2cl/Nrp1/Sipa1l1/Chn2/Rasgrp1/Rasa1/Ect2/Syngap1/Arhgap42/Rab3a/Rab3a/Gpsm3/Rapgef2/Usp6nl	56
MF	GO:0031267	small GTPase binding	68/1852	425/20759	1.56867e-06	0.000569824	0.000503313	Cyfip1/Dennd4b/Nsf/Clec16a/Appl2/Prex2/Dmxl2/Pde6d/Llgl2/Rgl2/Git1/Tbc1d30/Ralgps1/Sh3bp1/Rapgef3/Rapgef6/Tbc1d16/Arhgap4/Exoc1/Eps8l1/Tbc1d12/Diaph3/Ipo11/Sgsm1/Iqgap1/Anln/Pfn1/Xpo6/Pkn3/Rap1gap/A930011G23Rik/Dock10/Dock7/Strip1/Srgap2/Tbc1d5/Rab11fip1/Arhgef25/Arhgef28/Errfi1/Rabggtb/St5/Sergef/Rgl3/Tbc1d9/Als2cl/Eps8l2/Ipo4/Dock11/Plekhg3/Abi2/Itsn2/Mical1/Kif16b/Exph5/Rasgrp1/Pih1d2/Ngef/Vps…	68
MF	GO:0017016	Ras GTPase binding	66/1852	409/20759	1.64689e-06	0.000569824	0.000503313	Cyfip1/Dennd4b/Nsf/Clec16a/Appl2/Prex2/Dmxl2/Pde6d/Llgl2/Rgl2/Tbc1d30/Ralgps1/Sh3bp1/Rapgef3/Rapgef6/Tbc1d16/Arhgap4/Exoc1/Eps8l1/Tbc1d12/Diaph3/Ipo11/Sgsm1/Iqgap1/Anln/Pfn1/Xpo6/Pkn3/Rap1gap/A930011G23Rik/Dock10/Dock7/Strip1/Srgap2/Tbc1d5/Rab11fip1/Arhgef25/Arhgef28/Rabggtb/St5/Sergef/Rgl3/Tbc1d9/Als2cl/Eps8l2/Ipo4/Dock11/Plekhg3/Abi2/Itsn2/Mical1/Kif16b/Exph5/Rasgrp1/Pih1d2/Ngef/Vps52/Exoc2/Cdc…	66
MF	GO:0030695	GTPase regulator activity	46/1852	256/20759	3.4675e-06	0.000899816	0.000794787	Depdc5/Elmod3/Arhgap27/Prex2/Pde6d/Llgl2/Git1/Tbc1d30/Sh3bp1/Rabep2/Agap1/Tbc1d16/Arhgap4/Arhgap22/Dlc1/Tbc1d12/Sgsm1/Acap3/Smap2/Wnt11/Rap1gap/Srgap2/Syde1/Sec23b/Gpsm1/Tbc1d5/Rasal3/Dab2ip/Rgs3/Rgs9/Pgam5/Arhgap45/Arhgap24/Tbc1d9/Als2cl/Nrp1/Sipa1l1/Chn2/Rasgrp1/Rasa1/Ect2/Syngap1/Arhgap42/Gpsm3/Rapgef2/Usp6nl	46
MF	GO:0004842	ubiquitin-protein transferase activity	63/1852	397/20759	4.9347e-06	0.00102444	0.000904868	Unkl/Ube2d2a/Skp1a/Zer1/Tmem129/Eloc/Nosip/Trip12/Rnf167/Ubr4/Lrrc29/Cbll1/Siah1a/Mib1/Dtl/Fbxw5/Med12/Herc4/Cdk8/Fbxw2/Zfp91/Pex12/Pex12/Pex12/Pex12/Rnf25/Fbxl12/Rnf40/Rnf170/Anapc5/Trim47/Fbxl5/Ube3b/Amn1/Fbxl2/Pja1/Malt1/Rnf103/Dzip3/G2e3/Ubr3/Ubr1/Rnf144a/Rnf5/Trim68/Rnf181/Rnf181/Skp2/Skp2/Ube2d3/Jade2/Fbxl3/Nhlrc3/Trim32/Cdc34/Rnf20/Cul2/Rchy1/Maea/Dmac2/Fbxo7/Ube3a/Topors	63
MF	GO:0005096	GTPase activator activity	43/1852	239/20759	6.88963e-06	0.00119191	0.00105278	Depdc5/Elmod3/Arhgap27/Prex2/Llgl2/Git1/Tbc1d30/Sh3bp1/Rabep2/Agap1/Tbc1d16/Arhgap4/Arhgap22/Dlc1/Tbc1d12/Sgsm1/Acap3/Smap2/Wnt11/Rap1gap/Srgap2/Syde1/Sec23b/Tbc1d5/Rasal3/Dab2ip/Rgs3/Rgs9/Pgam5/Arhgap45/Arhgap24/Tbc1d9/Als2cl/Nrp1/Sipa1l1/Chn2/Rasgrp1/Rasa1/Ect2/Syngap1/Arhgap42/Rapgef2/Usp6nl	43
MF	GO:0019787	ubiquitin-like protein transferase activity	64/1852	417/20759	1.25183e-05	0.00185628	0.00163961	Unkl/Ube2d2a/Skp1a/Zer1/Tmem129/Eloc/Nosip/Trip12/Rnf167/Ubr4/Lrrc29/Cbll1/Siah1a/Mib1/Dtl/Fbxw5/Med12/Herc4/Cdk8/Fbxw2/Zfp91/Pex12/Pex12/Pex12/Pex12/Rnf25/Fbxl12/Rnf40/Rnf170/Anapc5/Trim47/Fbxl5/Ube3b/Amn1/Sumo3/Fbxl2/Pja1/Malt1/Rnf103/Dzip3/G2e3/Ubr3/Ubr1/Rnf144a/Rnf5/Trim68/Rnf181/Rnf181/Skp2/Skp2/Ube2d3/Jade2/Fbxl3/Nhlrc3/Trim32/Cdc34/Rnf20/Cul2/Rchy1/Maea/Dmac2/Fbxo7/Ube3a/Topors	64
MF	GO:0008047	enzyme activator activity	67/1852	449/20759	2.00713e-05	0.00237579	0.00209848	Depdc5/Elmod3/Arhgap27/Prex2/Llgl2/Git1/Tbc1d30/Fn1/Mob1b/Sh3bp1/Rabep2/Ncaph/Agap1/Tbc1d16/Arhgap4/Rptor/Arhgap22/Daxx/Dlc1/Tbc1d12/Sgsm1/Acap3/Iqgap1/Smap2/Wnt11/B3gat3/Casp8ap2/Cdkn1a/Rap1gap/Irgm2/Fgf13/Alkal1/Tor1aip1/Srgap2/Plaa/Syde1/Sec23b/Tbc1d5/Rack1/Rasal3/Dab2ip/Psmd14/Dnajc19/Rgs3/Dbf4/Malt1/Rgs9/Pgam5/Arhgap45/Ccnt2/Arhgap24/Tbc1d9/Als2cl/Nrp1/Sipa1l1/Chn2/Rasgrp1/Vac14/Wnk1/Rasa1/E…	67
MF	GO:0003779	actin binding	63/1852	415/20759	2.05993e-05	0.00237579	0.00209848	Mkl1/Cyfip1/Ablim2/Map1s/Cap1/Ablim1/Snca/Fkbp15/Ppp1r9a/Antxr1/Coro2b/Pknox2/Tmem201/Hook1/Shank3/Eps8l1/Epb41/Diaph3/Limch1/Sptbn1/Camsap3/Anln/Pfn1/Parva/Myo10/Shroom2/Macf1/Dst/Myo1e/Rcsd1/Akap5/Kptn/Hip1/Tmod4/S100a4/Hnrnpu/Hnrnpu/Actn4/Evl/Adssl1/Gmfg/Gmfb/Epb41l3/Pxk/Ttn/Xirp2/Syne2/Coro7/Ace/Med28/Phactr1/Eps8l2/Cnn1/Sipa1l1/Mical1/Actr3/Maea/Myo5a/Eef2/Myo1c/Map1a/Coro1a/Misp	63
MF	GO:0003712	transcription coregulator activity	67/1852	459/20759	4.05969e-05	0.00421396	0.0037221	Mkl1/Runx1t1/Spen/Rbpms/Kdm5a/Ncor2/Elf3/Ncoa3/Tcf3/Ppara/Gata3/Hyal2/Maml2/Wtip/Arid5b/Jade1/Pparg/Bcl11a/Ncoa7/Rara/Hdac7/Trp53bp1/Daxx/Helz2/Smarca2/Thrap3/Aes/Casp8ap2/Hif3a/Med12/Hspa1a/Raly/Fgf2/Kmt2c/Drap1/Mtdh/Ctbp2/Bcl9l/Ifi204/Parp9/Rbm39/Rxrb/Kat6a/Cited2/Hnrnpu/Hnrnpu/Actn4/Hcfc1/Ctbp1/Mier1/Tdg/Trib3/Zmynd11/Prdm16/Hes6/Limd1/Mef2a/Sra1/Ccar1/Ldb1/Rnf20/Ube3a/Trrap/Cenpj/Zhx3/Med15/H…	67
MF	GO:0016741	transferase activity, transferring one-carbon groups	36/1852	210/20759	0.000104951	0.0098372	0.00868898	Trmt11/Smyd4/Shmt2/Zcchc4/Gatm/Gatm/Mepce/Pemt/Ash2l/Dnmt1/Trmt1/Ehmt2/Bud23/Pcmt1/Pcmt1/Kmt2c/Prdm1/Suv39h1/Kmt5b/Aldh1l1/Mtr/Prmt8/Mettl1/Trmt1l/Fdxacb1/Prmt1/Setd1a/Trmt61a/Kmt5c/Men1/Men1/Spout1/Prdm6/Mettl21e/Ezh2/Rnmt	36
MF	GO:0008017	microtubule binding	39/1852	235/20759	0.000113725	0.0098372	0.00868898	Kif11/Kif11/S100a8/Nusap1/Map1s/Terf1/Cep57l1/Cfap157/Snca/Mtus1/Stard9/Nde1/Kif4/Hook1/Map4k4/Camsap3/Kif3c/Abraxas2/Spag8/Macf1/Fcho2/Dst/Kif21b/Fgf13/Eml1/Bcl2l11/Camsap1/Fcho1/Eml3/Map10/Dnm3/Prc1/Kif16b/Cryab/Fam161a/Arhgef2/Map1a/Cenpe/Sgip1	39
MF	GO:0008170	N-methyltransferase activity	19/1852	85/20759	0.000143393	0.0113349	0.0100119	Trmt11/Pemt/Ash2l/Trmt1/Ehmt2/Kmt2c/Suv39h1/Kmt5b/Prmt8/Trmt1l/Fdxacb1/Prmt1/Setd1a/Kmt5c/Men1/Men1/Prdm6/Ezh2/Rnmt	19
MF	GO:0004540	ribonuclease activity	23/1852	114/20759	0.000159601	0.0113349	0.0100119	Ear1/Cnot8/Rnaset2b/Pan3/Rnase1/Dis3l2/Slfn9/Slfn9/Slfn9/Slfn9/Tsen34/Slfn14/Slfn14/Slfn14/Slfn14/Ago3/Nudt16/Pld6/Eri2/Rexo2/Smg7/Tsn/Smg6	23
MF	GO:0008022	protein C-terminus binding	39/1852	239/20759	0.000163799	0.0113349	0.0100119	Nsf/Hic2/Terf1/Dab2/Fn1/Mif4gd/Dgkz/Ppp1r9a/Itpr1/Pparg/Shank3/Epb41/Siah1a/Mki67/Banf1/Vps4b/Med12/Ciita/Ncl/Sdc1/Pex12/Pex12/Pex12/Pex12/Sdcbp2/Sh3gl2/Atp2a2/Snx17/Cenpf/Synj2bp/Adcy8/Ercc3/Pxk/Atxn2/Pcgf1/Rab3a/Rab3a/Myo1c/Coro1a	39
MF	GO:0017124	SH3 domain binding	25/1852	131/20759	0.000212924	0.0136616	0.012067	Arhgap27/Gpx1/Bcar1/Itgb1bp2/Sh3bp1/Shank3/Ccdc6/Plscr3/Sh3bp5/Adam17/Akap5/Lancl1/Sh3bp2/Evl/Sirpa/Zfp384/Dab2ip/Adam19/Errfi1/Fut8/Abi2/Mical1/Mvb12a/Syngap1/Sgip1	25
MF	GO:0015631	tubulin binding	49/1852	327/20759	0.000223745	0.0136616	0.012067	Cep70/Kif11/Kif11/S100a8/Gnas/Nusap1/Map1s/Terf1/Cep57l1/Lrpprc/Cfap157/Snca/Mtus1/Stard9/Nde1/Kif4/Hook1/Smc3/Adnp/Map4k4/Camsap3/Kif3c/Abraxas2/Spag8/Agtpbp1/Macf1/Fcho2/Dst/Kif21b/Fgf13/Eml1/B9d2/Bcl2l11/Camsap1/Fcho1/Eml3/Sirt2/Map10/Dnm3/Prc1/Kif16b/Cryab/Fam161a/Arhgef2/Dnal1/Map1a/Cenpe/Cenpj/Sgip1	49
MF	GO:0008757	S-adenosylmethionine-dependent methyltransferase activity	26/1852	144/20759	0.000399852	0.0226459	0.0200027	Trmt11/Mepce/Pemt/Ash2l/Dnmt1/Trmt1/Ehmt2/Bud23/Pcmt1/Pcmt1/Kmt2c/Suv39h1/Kmt5b/Prmt8/Mettl1/Trmt1l/Fdxacb1/Prmt1/Setd1a/Trmt61a/Kmt5c/Men1/Men1/Prdm6/Ezh2/Rnmt	26
MF	GO:0005085	guanyl-nucleotide exchange factor activity	32/1852	192/20759	0.000414521	0.0226459	0.0200027	Dennd4b/Prex2/Rgl2/Ralgps1/Rapgef3/Rapgef6/Eps8l1/Cyth4/A930011G23Rik/Dock10/Dock7/Flcn/Arhgef25/Arhgef28/Fnip1/St5/Eif2b2/Sergef/Rgl3/Eps8l2/Dock11/Plekhg3/Itsn2/Rasgrp1/Ngef/Ect2/Arhgef2/Hps1/Rpgr/Dennd2c/Rapgef2/Bcar3	32
MF	GO:0004521	endoribonuclease activity	15/1852	65/20759	0.000486098	0.0252285	0.0222837	Rnase1/Slfn9/Slfn9/Slfn9/Slfn9/Tsen34/Slfn14/Slfn14/Slfn14/Slfn14/Ago3/Nudt16/Pld6/Tsn/Smg6	15
MF	GO:0005088	Ras guanyl-nucleotide exchange factor activity	23/1852	125/20759	0.000640503	0.0281727	0.0248843	Dennd4b/Prex2/Rgl2/Ralgps1/Rapgef3/Eps8l1/A930011G23Rik/Dock10/Arhgef25/Arhgef28/St5/Sergef/Rgl3/Eps8l2/Dock11/Plekhg3/Itsn2/Rasgrp1/Ngef/Ect2/Arhgef2/Dennd2c/Rapgef2	23
MF	GO:0003713	transcription coactivator activity	40/1852	264/20759	0.000646027	0.0281727	0.0248843	Mkl1/Rbpms/Kdm5a/Elf3/Ncoa3/Tcf3/Ppara/Gata3/Hyal2/Maml2/Arid5b/Jade1/Pparg/Ncoa7/Rara/Daxx/Helz2/Smarca2/Thrap3/Hif3a/Med12/Fgf2/Kmt2c/Mtdh/Ctbp2/Bcl9l/Rbm39/Rxrb/Kat6a/Cited2/Actn4/Hcfc1/Prdm16/Mef2a/Sra1/Ccar1/Rnf20/Ube3a/Trrap/Cenpj	40
MF	GO:0008168	methyltransferase activity	32/1852	197/20759	0.000655813	0.0281727	0.0248843	Trmt11/Smyd4/Zcchc4/Mepce/Pemt/Ash2l/Dnmt1/Trmt1/Ehmt2/Bud23/Pcmt1/Pcmt1/Kmt2c/Prdm1/Suv39h1/Kmt5b/Mtr/Prmt8/Mettl1/Trmt1l/Fdxacb1/Prmt1/Setd1a/Trmt61a/Kmt5c/Men1/Men1/Spout1/Prdm6/Mettl21e/Ezh2/Rnmt	32
MF	GO:0018024	histone-lysine N-methyltransferase activity	11/1852	41/20759	0.000704949	0.0281727	0.0248843	Ash2l/Ehmt2/Kmt2c/Suv39h1/Kmt5b/Setd1a/Kmt5c/Men1/Men1/Prdm6/Ezh2	11
MF	GO:0001098	basal transcription machinery binding	13/1852	54/20759	0.000740629	0.0281727	0.0248843	Elof1/Ncoa3/Paf1/Znhit6/Gtf2e2/Leo1/Supt4a/Nop58/Elp3/Taf2/Tbp/Hnrnpu/Hnrnpu	13
MF	GO:0001099	basal RNA polymerase II transcription machinery binding	13/1852	54/20759	0.000740629	0.0281727	0.0248843	Elof1/Ncoa3/Paf1/Znhit6/Gtf2e2/Leo1/Supt4a/Nop58/Elp3/Taf2/Tbp/Hnrnpu/Hnrnpu	13
MF	GO:0042054	histone methyltransferase activity	13/1852	54/20759	0.000740629	0.0281727	0.0248843	Ash2l/Ehmt2/Kmt2c/Suv39h1/Kmt5b/Prmt8/Prmt1/Setd1a/Kmt5c/Men1/Men1/Prdm6/Ezh2	13
MF	GO:0043021	ribonucleoprotein complex binding	26/1852	150/20759	0.000759957	0.0281727	0.0248843	Unk/Nmd3/Srp19/Rpsa/Snrpb/Naa16/Stau2/Rpn2/Eefsec/Slfn14/Slfn14/Slfn14/Slfn14/Eif6/Spcs1/Cpsf6/Hnrnpu/Hnrnpu/Rack1/Smg7/Prmt1/Smg6/Snrpb2/Ybx3/Eef2/Ezh2	26
MF	GO:0016780	phosphotransferase activity, for other substituted phosphate groups	7/1852	19/20759	0.000855284	0.0304143	0.0268643	Sgms1/Cept1/Sgms2/Sgms2/Pigo/Pign/Dpagt1	7
MF	GO:0001205	distal enhancer DNA-binding transcription activator activity, RNA polymerase II-specific	11/1852	42/20759	0.000879027	0.0304143	0.0268643	Nfkb1/Tcf3/Mef2c/Hoxb5/Pbx3/Cux1/Hcfc1/Nfatc1/Arid3b/Mef2a/Six1	11
MF	GO:0019902	phosphatase binding	33/1852	213/20759	0.00125572	0.0420464	0.0371386	Itga1/Magi2/Ppara/Ppp1r9a/Tctex1d4/Itpr1/Pparg/Ikbkb/Iqgap1/Hmgcr/Ptpn1/Pard3/Pxn/Gck/Akap5/Anapc5/Rack1/Sirpa/Ppp1r35/Dab2ip/Smg7/Fbxl2/Anapc4/Dzip3/Ankle2/Ank1/Phactr1/Eif2ak3/Wnk1/Ap3b1/Tbk1/Sh2d4a/Vrk3	33
MF	GO:0140098	catalytic activity, acting on RNA	46/1852	328/20759	0.00143301	0.0451742	0.0399013	Eprs/Trmt11/Ear1/Polr3b/Cnot8/Rnaset2b/Pan3/Dhx32/Mepce/Dhx35/Polr1c/Cars2/Trmt1/Rnase1/Helz2/Dis3l2/Slfn9/Slfn9/Slfn9/Slfn9/Tsen34/Bud23/Slfn14/Slfn14/Slfn14/Slfn14/Dhx34/Vars/Supv3l1/Dtd2/Polr3f/Ago3/Nudt16/Znrd1/Pld6/Eri2/Rexo2/Mettl1/Smg7/Trmt1l/Polr3e/Fdxacb1/Tsn/Smg6/Trmt61a/Rnmt	46
MF	GO:0043175	RNA polymerase core enzyme binding	10/1852	38/20759	0.00143617	0.0451742	0.0399013	Elof1/Ncoa3/Paf1/Leo1/Supt4a/Tcof1/Elp3/Hnrnpu/Hnrnpu/Maf1	10
MF	GO:0017048	Rho GTPase binding	27/1852	165/20759	0.00148726	0.045405	0.0401053	Cyfip1/Prex2/Rgl2/Sh3bp1/Arhgap4/Exoc1/Eps8l1/Diaph3/Iqgap1/Anln/Pfn1/Pkn3/Dock10/Dock7/Strip1/Srgap2/Arhgef25/Arhgef28/Eps8l2/Dock11/Plekhg3/Abi2/Itsn2/Ngef/Cdc42ep4/Ect2/Arhgef2	27
MF	GO:0019903	protein phosphatase binding	27/1852	166/20759	0.00162852	0.0482971	0.0426598	Itga1/Ppp1r9a/Tctex1d4/Itpr1/Pparg/Ikbkb/Iqgap1/Hmgcr/Ptpn1/Pard3/Pxn/Gck/Akap5/Anapc5/Rack1/Sirpa/Dab2ip/Smg7/Fbxl2/Anapc4/Ankle2/Ank1/Phactr1/Eif2ak3/Ap3b1/Tbk1/Vrk3	27

## Sheet: F_vs_HmRNA_GO_all_enrich
ONTOLOGY	ID	Description	GeneRatio	BgRatio	pvalue	p.adjust	qvalue	geneID	Count
BP	GO:0007059	chromosome segregation	100/2387	315/21092	1.10092e-22	6.52736e-19	5.15695e-19	Kif23/Ect2/Ccne2/Pttg1/Bub1b/Spdl1/Ccne1/Nsl1/Knl1/Nusap1/Trip13/Tex15/Kif2c/Terf1/Cenpn/Plk1/Ncapd2/Racgap1/Brca1/Cenpx/Chmp4b/Fen1/Ccnb1/Top2a/Smc5/Spag5/Cit/Kif4/Kif18a/A730008H23Rik/Ska3/Stil/Fam83d/Mtbp/Esco2/Mki67/Blm/Smc2/Cep192/Mms19/Cdca2/Gen1/Ddx11/Bub1/Smc6/Zfp207/Tacc3/Cenph/Cenpq/Ino80/Anapc5/Brca2/Hnrnpu/Hnrnpu/Cenpc1/Naa60/Ndc80/Haspin/Kif18b/Pibf1/Cdc27/Pum1/Pum1/Cenpf/Fancd2/Ncap…	100
BP	GO:0044770	cell cycle phase transition	112/2387	390/21092	2.54646e-21	7.54898e-18	5.96407e-18	Ccne2/Bub1b/Ptpn6/Slfn1/Slfn1/Slfn1/Slfn1/Spdl1/Ccne1/Eif4ebp1/Rfwd3/Trip13/Ube2c/Fhl1/Terf1/Plk1/Arpp19/Iqgap3/Zc3h12d/Rbl1/Brca1/Ticrr/Chmp4b/Ccnb1/Pole/Timeless/Syf2/Cdkn2c/Usp47/Myb/Cit/Babam2/Klf11/Taf2/Ccnd1/Stil/Foxm1/Skp2/Skp2/Fam83d/Mtbp/Fam107a/Hinfp/Cdkn1a/Tpra1/Spast/Dgkz/Cks1b/Ccna2/Ankrd17/Dtl/Blm/Cep192/Cyp1a1/Gen1/Psme1/Abraxas1/Ptprc/Lmnb1/Bub1/Chek2/Wnt10b/Rbm38/Zfp207/Orc1/Sirt…	112
BP	GO:0044772	mitotic cell cycle phase transition	104/2387	352/21092	6.81245e-21	1.34637e-17	1.0637e-17	Ccne2/Bub1b/Ptpn6/Slfn1/Slfn1/Slfn1/Slfn1/Spdl1/Ccne1/Eif4ebp1/Rfwd3/Trip13/Ube2c/Fhl1/Terf1/Plk1/Arpp19/Iqgap3/Zc3h12d/Rbl1/Brca1/Ticrr/Chmp4b/Ccnb1/Pole/Syf2/Cdkn2c/Usp47/Myb/Cit/Klf11/Taf2/Ccnd1/Stil/Foxm1/Skp2/Skp2/Mtbp/Fam107a/Hinfp/Cdkn1a/Tpra1/Spast/Dgkz/Cks1b/Ccna2/Ankrd17/Dtl/Blm/Cep192/Cyp1a1/Gen1/Psme1/Lmnb1/Bub1/Chek2/Wnt10b/Rbm38/Zfp207/Orc1/Sirt7/Tacc3/Ino80/Anapc5/Ube2e2/Ndc80/Hasp…	104
BP	GO:0140014	mitotic nuclear division	85/2387	276/21092	1.50491e-18	2.23065e-15	1.76233e-15	Kif23/Ccne2/Pttg1/Bub1b/Kif11/Kif11/Nme6/Spdl1/Ccne1/Nsl1/Nusap1/Trip13/Ube2c/Kif2c/Terf1/Plk1/Ncapd2/Racgap1/Flna/Chmp4b/Ccnb1/Smc5/Spag5/Cit/Kif4/Kif18a/Ccnd1/Stil/Mtbp/Spast/Insr/Ccna2/Mki67/Aurka/Smc2/Cep192/Gen1/Fgfr3/Ccno/Ccnb2/Bub1/Chek2/Zfp207/Sirt7/Tacc3/Ino80/Anapc5/Hnrnpu/Hnrnpu/Cenpc1/Ndc80/Tpx2/Haspin/Sh2b1/Kif18b/Pibf1/Kifc1/Cdc27/Ccnf/Ccnd3/Ncapg/Kif22/Atrx/Ncaph2/Cdc20/Birc5/Aurkb…	85
BP	GO:0010948	negative regulation of cell cycle process	75/2387	228/21092	2.50691e-18	2.9727e-15	2.34858e-15	Pttg1/Bub1b/Slfn1/Slfn1/Slfn1/Slfn1/Nme6/Spdl1/Rfwd3/Trip13/Fhl1/Terf1/Nubp1/Plk1/E2f8/Zc3h12d/Rbl1/Brca1/Ticrr/Mdm1/Ccnb1/Syf2/Usp47/Rassf1/Babam2/Ccnd1/Stil/Mtbp/Fam107a/Cdkn1a/Tpra1/Dgkz/Dtl/Blm/Grb14/Cep192/Gen1/Abraxas1/Fgfr3/Cdk9/Bub1/Chek2/Rbm38/Zfp207/Orc1/Ndc80/Haspin/Dab2ip/Kifc1/Ccnf/Cdk4/Pml/Tmem67/Atrx/E2f7/Birc5/Aurkb/Fbxo31/Cdk1/Ctdspl/Ttk/Men1/Men1/Cdkn2d/Pidd1/Fbxo7/Prmt2/Cdc6/Sm…	75
BP	GO:0045786	negative regulation of cell cycle	115/2387	454/21092	3.10269e-17	3.02124e-14	2.38694e-14	Zwilch/Pttg1/Bub1b/Slfn1/Slfn1/Slfn1/Slfn1/Nme6/Spdl1/Chfr/Rfwd3/Mcph1/Trip13/Fhl1/Nsun2/Terf1/Nubp1/Casp3/Plk1/Notch2/E2f8/Pkd1/Zc3h12d/Rbl1/Brca1/Gata3/Ticrr/Pnpt1/Mdm1/Ccnb1/Top2a/Timeless/Syf2/Cdkn2c/Usp47/Rassf1/Babam2/Ccnd1/Stil/Foxm1/Ppm1g/Mtbp/Rnf167/Fam107a/Ets1/Hinfp/Cdkn1a/Tpra1/Dgkz/Map3k20/Usp28/Dtl/Blm/Aurka/Grb14/Cep192/Gen1/Dna2/Abraxas1/Fgfr3/Cdk9/Bub1/Chek2/Wnt10b/Rbm38/Zfp207/O…	115
BP	GO:0098813	nuclear chromosome segregation	79/2387	258/21092	3.56699e-17	3.02124e-14	2.38694e-14	Kif23/Ect2/Ccne2/Pttg1/Bub1b/Spdl1/Ccne1/Nsl1/Knl1/Nusap1/Trip13/Tex15/Kif2c/Terf1/Plk1/Ncapd2/Racgap1/Cenpx/Chmp4b/Fen1/Ccnb1/Top2a/Smc5/Spag5/Cit/Kif4/Kif18a/Stil/Fam83d/Mtbp/Esco2/Blm/Smc2/Cep192/Gen1/Ddx11/Bub1/Zfp207/Tacc3/Cenpq/Ino80/Anapc5/Brca2/Hnrnpu/Hnrnpu/Cenpc1/Ndc80/Haspin/Kif18b/Pibf1/Cdc27/Cenpf/Fancd2/Ncapg/Kif22/Atrx/Ncaph2/Cdc20/Rmi2/Brip1/Birc5/Aurkb/Cdca8/Mus81/Ttk/Mcmbp/Knstr…	79
BP	GO:0000819	sister chromatid segregation	63/2387	182/21092	7.72282e-17	5.72358e-14	4.52192e-14	Kif23/Pttg1/Bub1b/Spdl1/Nsl1/Nusap1/Trip13/Kif2c/Terf1/Plk1/Ncapd2/Racgap1/Chmp4b/Fen1/Ccnb1/Top2a/Smc5/Spag5/Cit/Kif4/Kif18a/Stil/Mtbp/Esco2/Smc2/Cep192/Gen1/Ddx11/Bub1/Zfp207/Tacc3/Ino80/Anapc5/Hnrnpu/Hnrnpu/Cenpc1/Ndc80/Haspin/Kif18b/Pibf1/Cdc27/Ncapg/Kif22/Atrx/Ncaph2/Cdc20/Rmi2/Birc5/Aurkb/Cdca8/Ttk/Mcmbp/Knstrn/Sgo1/Pds5a/Cdca5/Psrc1/Cdc6/Smc3/Cenpe/Cdt1/Hdac8/Fbxo5	63
BP	GO:0000070	mitotic sister chromatid segregation	55/2387	148/21092	1.98811e-16	1.30972e-13	1.03475e-13	Kif23/Pttg1/Bub1b/Spdl1/Nsl1/Nusap1/Trip13/Kif2c/Terf1/Plk1/Ncapd2/Racgap1/Chmp4b/Ccnb1/Smc5/Spag5/Cit/Kif4/Kif18a/Stil/Mtbp/Smc2/Cep192/Gen1/Bub1/Zfp207/Tacc3/Ino80/Anapc5/Hnrnpu/Hnrnpu/Cenpc1/Ndc80/Haspin/Kif18b/Pibf1/Cdc27/Ncapg/Kif22/Atrx/Ncaph2/Cdc20/Birc5/Aurkb/Cdca8/Ttk/Knstrn/Sgo1/Pds5a/Cdca5/Psrc1/Cdc6/Cenpe/Cdt1/Fbxo5	55
BP	GO:1901988	negative regulation of cell cycle phase transition	57/2387	164/21092	1.84754e-15	1.0433e-12	8.24261e-13	Bub1b/Slfn1/Slfn1/Slfn1/Slfn1/Spdl1/Rfwd3/Trip13/Fhl1/Terf1/Plk1/Zc3h12d/Rbl1/Brca1/Ticrr/Ccnb1/Syf2/Usp47/Babam2/Ccnd1/Stil/Mtbp/Fam107a/Cdkn1a/Tpra1/Dgkz/Dtl/Blm/Cep192/Gen1/Abraxas1/Bub1/Rbm38/Zfp207/Orc1/Ndc80/Haspin/Pml/E2f7/Birc5/Aurkb/Fbxo31/Cdk1/Ctdspl/Ttk/Men1/Men1/Cdkn2d/Pidd1/Fbxo7/Prmt2/Cdc6/Cenpe/Cdt1/Ezh2/Rad17/Fbxo5	57
BP	GO:1901987	regulation of cell cycle phase transition	82/2387	291/21092	1.93562e-15	1.0433e-12	8.24261e-13	Bub1b/Ptpn6/Slfn1/Slfn1/Slfn1/Slfn1/Spdl1/Rfwd3/Trip13/Ube2c/Fhl1/Terf1/Plk1/Zc3h12d/Rbl1/Brca1/Ticrr/Ccnb1/Syf2/Usp47/Babam2/Ccnd1/Stil/Fam83d/Mtbp/Fam107a/Cdkn1a/Tpra1/Dgkz/Ankrd17/Dtl/Blm/Cep192/Cyp1a1/Gen1/Psme1/Abraxas1/Lmnb1/Bub1/Wnt10b/Rbm38/Zfp207/Orc1/Ino80/Anapc5/Ube2e2/Ndc80/Haspin/E2f1/Cenpf/Cdk4/Pml/Hyal1/Ccnd3/Sin3a/Stxbp4/Larp7/E2f7/Birc5/Aurkb/Fbxo31/Cdk1/Ctdspl/Cdc25c/Ttk/Men1/Me…	82
BP	GO:0000280	nuclear division	105/2387	421/21092	2.34201e-15	1.15715e-12	9.14207e-13	Kif23/Ccne2/Pttg1/Bub1b/Kif11/Kif11/Nme6/Spdl1/Ccne1/Nsl1/Rad51/Nusap1/Trip13/Ube2c/Tex15/Kif2c/Terf1/Plk1/Ncapd2/Racgap1/Cenpx/Flna/Chmp4b/Msh3/Ccnb1/Mybl1/Top2a/Smc5/Spag5/Cit/Kif4/Kif18a/Ccnd1/Stil/Mtbp/Spast/Insr/Ccna2/Mki67/Blm/Aurka/Smc2/Cep192/Gen1/Fgfr3/Ccno/Ccnb2/Bub1/Chek2/Zfp207/Sirt7/Tacc3/Ino80/Anapc5/Brca2/Hnrnpu/Hnrnpu/Cenpc1/Fanca/Ndc80/Tpx2/Haspin/Sh2b1/Kif18b/Pibf1/Kifc1/Cdc27/A…	105
BP	GO:0000075	cell cycle checkpoint	59/2387	176/21092	3.89015e-15	1.77421e-12	1.40171e-12	Zwilch/Bub1b/Spdl1/Chfr/Rfwd3/Trip13/Nsun2/Terf1/Plk1/Brca1/Ticrr/Ccnb1/Top2a/Timeless/Syf2/Babam2/Ccnd1/Stil/Mtbp/Hinfp/Cdkn1a/Dgkz/Map3k20/Usp28/Dtl/Blm/Aurka/Cep192/Gen1/Dna2/Abraxas1/Bub1/Chek2/Rbm38/Zfp207/Orc1/Trp53bp1/Ndc80/E2f1/Mapk14/Pml/Atr/Birc5/Aurkb/Fbxo31/Cdk1/Mus81/Ints3/Ttk/Kntc1/Pidd1/Cdc6/Thoc5/Nek11/Cenpe/Cdt1/Rad17/Nabp1/Eme1	59
BP	GO:0045930	negative regulation of mitotic cell cycle	71/2387	238/21092	6.29593e-15	2.66633e-12	2.10653e-12	Zwilch/Pttg1/Bub1b/Slfn1/Slfn1/Slfn1/Slfn1/Nme6/Spdl1/Chfr/Rfwd3/Mcph1/Trip13/Fhl1/Terf1/Plk1/Zc3h12d/Rbl1/Brca1/Ticrr/Pnpt1/Ccnb1/Top2a/Syf2/Usp47/Ccnd1/Stil/Mtbp/Fam107a/Cdkn1a/Tpra1/Dgkz/Map3k20/Blm/Cep192/Gen1/Fgfr3/Bub1/Chek2/Rbm38/Zfp207/Orc1/Egfr/Ndc80/Haspin/Pml/Atrx/E2f7/Birc5/Aurkb/Fbxo31/Cdk1/Ctdspl/Mus81/Ints3/Ttk/Abl1/Kntc1/Pidd1/Fbxo7/Prmt2/Cdc6/Nek11/Cenpe/Cdt1/Ezh2/Rad17/Fbxo5/Ddi…	71
BP	GO:1901990	regulation of mitotic cell cycle phase transition	75/2387	260/21092	7.92834e-15	3.13381e-12	2.47587e-12	Bub1b/Ptpn6/Slfn1/Slfn1/Slfn1/Slfn1/Spdl1/Rfwd3/Trip13/Ube2c/Fhl1/Terf1/Plk1/Zc3h12d/Rbl1/Brca1/Ticrr/Ccnb1/Syf2/Usp47/Ccnd1/Stil/Mtbp/Fam107a/Cdkn1a/Tpra1/Dgkz/Ankrd17/Dtl/Blm/Cep192/Cyp1a1/Gen1/Psme1/Lmnb1/Bub1/Wnt10b/Rbm38/Zfp207/Orc1/Ino80/Anapc5/Ube2e2/Ndc80/Haspin/E2f1/Cenpf/Cdk4/Pml/Hyal1/Ccnd3/Sin3a/Larp7/E2f7/Birc5/Aurkb/Fbxo31/Cdk1/Ctdspl/Cdc25c/Ttk/Pidd1/Cdca5/Fbxo7/Prmt2/Cdc6/Plcb1/Ne…	75
BP	GO:0010639	negative regulation of organelle organization	99/2387	394/21092	8.94438e-15	3.31445e-12	2.61858e-12	Tbc1d30/Lig3/Pttg1/Bub1b/Atad2/Atad2/Clec16a/Nme6/Spdl1/Trip13/Kdm4a/Terf1/Nubp1/Plk1/Arap1/Map4/Prkcd/Kdm5a/Hnrnpc/Brca1/Mcrs1/Chmp4b/Mpv17l/Mdm1/Ppp1r9a/Ccnb1/Top2a/Hist1h1a/Stil/Dnmt1/Mtbp/Tacstd2/Dlc1/Hdgfl3/Flcn/Map2/Cav3/Cep192/Tmod2/Gen1/Usp30/Zfp451/Fgfr3/Shank1/Bub1/Cib1/Terf2ip/Zfp207/Bcor/Pax5/Hnrnpu/Hnrnpu/Ckap2/Ndc80/Twf2/Hdac6/Odf2l/Dysf/Tpm1/Kifc1/Htra2/Gmfg/Ccnf/Gmfb/Pml/Capg/Insi…	99
BP	GO:0051983	regulation of chromosome segregation	43/2387	106/21092	9.8842e-15	3.44726e-12	2.72351e-12	Ect2/Pttg1/Bub1b/Spdl1/Trip13/Kif2c/Terf1/Plk1/Racgap1/Fen1/Ccnb1/Smc5/Spag5/Cit/Stil/Mtbp/Mki67/Cep192/Gen1/Ddx11/Bub1/Smc6/Zfp207/Tacc3/Anapc5/Hnrnpu/Hnrnpu/Ndc80/Cdc27/Pum1/Pum1/Atrx/Rmi2/Birc5/Aurkb/Ttk/Knstrn/Cdca5/Cdc6/Cenpe/Cdt1/Hdac8/Fbxo5	43
BP	GO:0045787	positive regulation of cell cycle	92/2387	362/21092	3.85142e-14	1.26862e-11	1.00227e-11	Kif23/Ect2/Fnta/Ccne2/Ccne1/Eif4ebp1/Tgm1/Nusap1/Ube2c/Terf1/Racgap1/E2f8/Brca1/Fen1/Ccnb1/Trim21/Smc5/Spag5/Wiz/Cit/Cxcr5/Rassf1/Ccnd1/Stil/Pkp4/Fam83d/Mtbp/Cdkn1a/Spast/Cks1b/Insr/Ccna2/Ankrd17/Gdpd5/Dtl/Aurka/Gpsm2/Cyp1a1/Gen1/Ddx11/Ccno/Meis2/Ccnb2/Cdk9/Lmnb1/Chek2/Wnt10b/Rbm38/Orc1/Srpk2/Ino80/Anapc5/Ube2e2/Brca2/Hnrnpu/Hnrnpu/Ndc80/Sh2b1/Dab2ip/Ccnf/Cdk4/Pml/Hyal1/Ccnd3/Atrx/Sin3a/Stxbp4/La…	92
BP	GO:1901991	negative regulation of mitotic cell cycle phase transition	51/2387	146/21092	4.40102e-14	1.37335e-11	1.08502e-11	Bub1b/Slfn1/Slfn1/Slfn1/Slfn1/Spdl1/Rfwd3/Trip13/Fhl1/Terf1/Plk1/Zc3h12d/Rbl1/Brca1/Ticrr/Ccnb1/Syf2/Usp47/Ccnd1/Stil/Mtbp/Fam107a/Cdkn1a/Tpra1/Dgkz/Blm/Cep192/Gen1/Bub1/Rbm38/Zfp207/Orc1/Ndc80/Haspin/Pml/E2f7/Birc5/Aurkb/Fbxo31/Cdk1/Ctdspl/Ttk/Pidd1/Fbxo7/Prmt2/Cdc6/Cenpe/Cdt1/Ezh2/Rad17/Fbxo5	51
BP	GO:0007051	spindle organization	55/2387	166/21092	5.7738e-14	1.71164e-11	1.35228e-11	Kif23/Kif11/Kif11/Tbce/Aunip/Dctn1/Plk1/Racgap1/Pkd1/Map4/Senp6/Flna/Chmp4b/Ccnb1/Stard9/Spag5/Kif4/Stil/Spast/Aurka/Cep192/Gpsm2/Chek2/Ncor1/Zfp207/Tacc3/Eml1/Ino80/Hnrnpu/Hnrnpu/Ndc80/Parp3/Tpx2/Haus3/Wdr62/Pibf1/Kifc1/Rae1/Aspm/Chd3/Atrx/Spc25/Pde4dip/Cdc20/Aurkb/Knstrn/Rhoa/Myh9/Psrc1/Smc3/Mybl2/Cenpe/Rcc1/Cenpj/Fbxo5	55
BP	GO:0048285	organelle fission	109/2387	470/21092	1.31266e-13	3.70608e-11	2.92799e-11	Kif23/Ccne2/Pttg1/Bub1b/Kif11/Kif11/Nme6/Spdl1/Ccne1/Nsl1/Rad51/Nusap1/Trip13/Ube2c/Tex15/Kif2c/Terf1/Plk1/Ncapd2/Racgap1/Cenpx/Flna/Chmp4b/Msh3/Ccnb1/Mybl1/Top2a/Smc5/Spag5/Cit/Kif4/Kif18a/Ccnd1/Stil/Mtbp/Spast/Insr/Ccna2/Mki67/Blm/Aurka/Smc2/Cep192/Gen1/Tmem135/Fgfr3/Ccno/Acox1/Ccnb2/Bub1/Chek2/Zfp207/Sirt7/Tacc3/Ino80/Anapc5/Brca2/Hnrnpu/Hnrnpu/Cenpc1/Fanca/Ndc80/Tpx2/Haspin/Sh2b1/Kif18b/Pibf1…	109
BP	GO:0006260	DNA replication	69/2387	243/21092	2.17613e-13	5.86468e-11	4.6334e-11	Lig3/Dhx9/Ccne2/Mcidas/Ccne1/Rfwd3/Rad51/Rpa1/Terf1/E2f8/Cenpx/Ticrr/Fen1/Msh3/Pole/Timeless/E4f1/Wiz/Orc3/Nfic/Mcm3/Rrm2/Rrm1/Esco2/Ccna2/Ankrd17/Nfib/Dtl/Blm/Gen1/Dna2/Ddx11/Mcm7/Rfc5/Pole2/Cdk9/Chek2/Orc1/Orc6/Ino80/Brca2/Tonsl/Pclaf/Egfr/Rac1/Polk/Ing4/Rbbp7/Polq/Atrx/Sin3a/Atr/Rmi2/Ssbp1/E2f7/Cdk1/Rnaseh2a/Id3/Mcmbp/Pds5a/Cdc6/Smc3/Cdt1/Dbf4/Rad17/Ehmt2/Fbxo5/Atg7/Eme1	69
BP	GO:0044843	cell cycle G1/S phase transition	57/2387	188/21092	1.38063e-12	3.55903e-10	2.81182e-10	Ccne2/Ptpn6/Slfn1/Slfn1/Slfn1/Slfn1/Ccne1/Eif4ebp1/Rfwd3/Fhl1/Iqgap3/Zc3h12d/Rbl1/Pole/Cdkn2c/Myb/Klf11/Ccnd1/Skp2/Skp2/Fam83d/Mtbp/Fam107a/Hinfp/Cdkn1a/Dgkz/Ccna2/Ankrd17/Cyp1a1/Psme1/Rbm38/Ino80/Ube2e2/Haspin/E2f1/Cdk4/Nfatc1/Pml/Camk2g/Hyal1/Ccnd3/Stxbp4/Larp7/E2f7/Fbxo31/Ctdspl/Men1/Men1/Cdkn2d/Pidd1/Fbxo7/Prmt2/Plcb1/Rcc1/Ezh2/Camk2d/Dbf4	57
BP	GO:0070507	regulation of microtubule cytoskeleton organization	59/2387	200/21092	2.03999e-12	5.03963e-10	3.98157e-10	Kif11/Kif11/Pak1/Mcph1/Rassf7/Terf1/Nubp1/Dctn1/Plk1/Pkd1/Senp6/Chmp4b/Mdm1/Spag5/Rassf1/Agrn/Kif18a/Ska3/Stil/Fam107a/Hdgfl3/Cyld/Map2/Cav3/Cep192/Gpsm2/Gen1/Prkaa1/Cib1/Tacc3/Mark4/Hnrnpu/Hnrnpu/Ckap2/Clip1/Parp3/Tpx2/Hdac6/Rac1/Dysf/Kifc1/Rae1/Ccnf/Mark2/Inpp5j/Tmem67/Ska2/Pde4dip/Phldb2/Map6/Abl1/Rhoa/Psrc1/Mid1/Smc3/Map1a/Cenpj/Nin/Camsap3	59
BP	GO:0007093	mitotic cell cycle checkpoint	45/2387	131/21092	2.64673e-12	6.03557e-10	4.7684e-10	Zwilch/Bub1b/Spdl1/Chfr/Rfwd3/Trip13/Terf1/Plk1/Brca1/Ticrr/Ccnb1/Top2a/Syf2/Ccnd1/Stil/Mtbp/Cdkn1a/Dgkz/Map3k20/Blm/Cep192/Gen1/Bub1/Chek2/Rbm38/Zfp207/Orc1/Ndc80/Pml/Birc5/Aurkb/Fbxo31/Cdk1/Mus81/Ints3/Ttk/Kntc1/Pidd1/Cdc6/Nek11/Cenpe/Cdt1/Rad17/Nabp1/Eme1	45
BP	GO:1902850	microtubule cytoskeleton organization involved in mitosis	45/2387	131/21092	2.64673e-12	6.03557e-10	4.7684e-10	Kif23/Kif11/Kif11/Spdl1/Mcph1/Nusap1/Tbce/Dctn1/Plk1/Racgap1/Pkd1/Map4/Flna/Chmp4b/Ccnb1/Kif4/Stil/Spast/Aurka/Cenpa/Cep192/Gpsm2/Chek2/Zfp207/Tacc3/Eml1/Hnrnpu/Hnrnpu/Ndc80/Parp3/Tpx2/Wdr62/Pibf1/Kifc1/Rae1/Spc25/Cdc20/Aurkb/Nde1/Rhoa/Psrc1/Smc3/Mybl2/Cenpe/Rcc1	45
BP	GO:0007052	mitotic spindle organization	40/2387	109/21092	3.90261e-12	8.56985e-10	6.77062e-10	Kif23/Kif11/Kif11/Tbce/Dctn1/Plk1/Racgap1/Pkd1/Map4/Flna/Chmp4b/Ccnb1/Kif4/Stil/Spast/Aurka/Cep192/Gpsm2/Chek2/Zfp207/Tacc3/Eml1/Hnrnpu/Hnrnpu/Ndc80/Parp3/Tpx2/Wdr62/Pibf1/Kifc1/Rae1/Spc25/Cdc20/Aurkb/Rhoa/Psrc1/Smc3/Mybl2/Cenpe/Rcc1	40
BP	GO:0033044	regulation of chromosome organization	85/2387	349/21092	4.29571e-12	8.85691e-10	6.99741e-10	Wdr61/Pttg1/Bub1b/Atad2/Atad2/Spdl1/Tlk1/Mcph1/Trip13/Kdm4a/Terf1/Plk1/Ube2n/Uty/Senp6/Kdm5a/Hnrnpc/Brca1/Gata3/Mcrs1/Fen1/Ccnb1/Top2a/Smc5/Myb/Cit/Hist1h1a/Stil/Dnmt1/Mtbp/Gnl3/Arrb1/Phf19/Flcn/Mki67/Paxbp1/Cep192/Srebf1/Rnf20/Gen1/Ddx11/Zfp451/Cdk9/Bub1/Ncor1/Terf2ip/Zfp207/Tacc3/Bcor/Anapc5/Pax5/Hnrnpu/Hnrnpu/Ndc80/Snw1/Cct2/Cdc27/Pml/Kdm2a/Smg1/Atrx/Sin3a/Kdm4b/Tinf2/Atr/Rmi2/Hist1h1b/Birc5/A…	85
BP	GO:0033045	regulation of sister chromatid segregation	34/2387	83/21092	4.3321e-12	8.85691e-10	6.99741e-10	Pttg1/Bub1b/Spdl1/Trip13/Terf1/Plk1/Fen1/Ccnb1/Smc5/Cit/Stil/Mtbp/Cep192/Gen1/Ddx11/Bub1/Zfp207/Tacc3/Anapc5/Hnrnpu/Hnrnpu/Ndc80/Cdc27/Atrx/Rmi2/Birc5/Aurkb/Ttk/Cdca5/Cdc6/Cenpe/Cdt1/Hdac8/Fbxo5	34
BP	GO:0090068	positive regulation of cell cycle process	66/2387	246/21092	1.19378e-11	2.35931e-09	1.86397e-09	Kif23/Ect2/Nusap1/Ube2c/Terf1/Racgap1/E2f8/Brca1/Fen1/Ccnb1/Smc5/Spag5/Wiz/Cit/Cxcr5/Ccnd1/Pkp4/Fam83d/Mtbp/Cdkn1a/Spast/Insr/Ankrd17/Dtl/Gpsm2/Cyp1a1/Gen1/Ddx11/Lmnb1/Wnt10b/Rbm38/Orc1/Ino80/Anapc5/Ube2e2/Hnrnpu/Hnrnpu/Ndc80/Sh2b1/Dab2ip/Cdk4/Pml/Hyal1/Ccnd3/Atrx/Sin3a/Stxbp4/Larp7/E2f7/Birc5/Aurkb/Cdk1/Cdc25c/Pidd1/Rhoa/Cdca5/Cdc6/Plcb1/Kif20b/Cenpe/Cdt1/Ezh2/Cenpj/Dbf4/Fbxo5/Pdgfrb	66
BP	GO:0000082	G1/S transition of mitotic cell cycle	52/2387	173/21092	1.88625e-11	3.60761e-09	2.85019e-09	Ccne2/Ptpn6/Slfn1/Slfn1/Slfn1/Slfn1/Ccne1/Eif4ebp1/Rfwd3/Fhl1/Iqgap3/Zc3h12d/Rbl1/Pole/Cdkn2c/Myb/Klf11/Ccnd1/Skp2/Skp2/Mtbp/Fam107a/Hinfp/Cdkn1a/Dgkz/Ankrd17/Cyp1a1/Psme1/Rbm38/Ino80/Ube2e2/Haspin/E2f1/Cdk4/Nfatc1/Pml/Camk2g/Hyal1/Ccnd3/Larp7/E2f7/Fbxo31/Ctdspl/Cdkn2d/Pidd1/Fbxo7/Prmt2/Plcb1/Rcc1/Ezh2/Camk2d/Dbf4	52
BP	GO:0033047	regulation of mitotic sister chromatid segregation	29/2387	69/21092	7.62474e-11	1.41272e-08	1.11612e-08	Pttg1/Bub1b/Spdl1/Trip13/Terf1/Plk1/Ccnb1/Smc5/Cit/Stil/Mtbp/Cep192/Gen1/Bub1/Zfp207/Tacc3/Anapc5/Hnrnpu/Hnrnpu/Ndc80/Cdc27/Atrx/Birc5/Aurkb/Ttk/Cdc6/Cenpe/Cdt1/Fbxo5	29
BP	GO:0007088	regulation of mitotic nuclear division	52/2387	181/21092	1.20368e-10	2.16261e-08	1.70857e-08	Ccne2/Pttg1/Bub1b/Kif11/Kif11/Nme6/Spdl1/Ccne1/Nusap1/Trip13/Ube2c/Terf1/Plk1/Chmp4b/Ccnb1/Smc5/Cit/Ccnd1/Stil/Mtbp/Insr/Ccna2/Mki67/Cep192/Gen1/Fgfr3/Ccno/Ccnb2/Bub1/Zfp207/Tacc3/Anapc5/Hnrnpu/Hnrnpu/Ndc80/Sh2b1/Cdc27/Ccnf/Ccnd3/Atrx/Birc5/Aurkb/Ttk/Cdca5/Cdc6/Smc3/Kif20b/Cenpe/Rcc1/Cdt1/Fbxo5/Pdgfrb	52
BP	GO:0051306	mitotic sister chromatid separation	26/2387	60/21092	3.21004e-10	5.59775e-08	4.42251e-08	Pttg1/Bub1b/Spdl1/Trip13/Terf1/Plk1/Ccnb1/Cit/Stil/Mtbp/Cep192/Gen1/Bub1/Zfp207/Tacc3/Anapc5/Ndc80/Cdc27/Ncaph2/Birc5/Aurkb/Ttk/Cdc6/Cenpe/Cdt1/Fbxo5	26
BP	GO:0006261	DNA-dependent DNA replication	42/2387	135/21092	4.9052e-10	8.30942e-08	6.56486e-08	Lig3/Ccne2/Ccne1/Rfwd3/Rad51/Rpa1/E2f8/Cenpx/Ticrr/Fen1/Msh3/Pole/Timeless/Wiz/Orc3/Mcm3/Blm/Gen1/Dna2/Ddx11/Mcm7/Rfc5/Pole2/Cdk9/Chek2/Orc1/Orc6/Ino80/Brca2/Tonsl/Polq/Atrx/Ssbp1/E2f7/Rnaseh2a/Mcmbp/Cdc6/Smc3/Cdt1/Fbxo5/Atg7/Eme1	42
BP	GO:0010965	regulation of mitotic sister chromatid separation	25/2387	57/21092	5.13219e-10	8.45243e-08	6.67785e-08	Pttg1/Bub1b/Spdl1/Trip13/Terf1/Plk1/Ccnb1/Cit/Stil/Mtbp/Cep192/Gen1/Bub1/Zfp207/Tacc3/Anapc5/Ndc80/Cdc27/Birc5/Aurkb/Ttk/Cdc6/Cenpe/Cdt1/Fbxo5	25
BP	GO:0051304	chromosome separation	33/2387	92/21092	5.83179e-10	9.34505e-08	7.38306e-08	Pttg1/Bub1b/Spdl1/Trip13/Terf1/Plk1/Ncapd2/Cenpx/Ccnb1/Top2a/Cit/Stil/Mtbp/Blm/Cep192/Gen1/Bub1/Zfp207/Tacc3/Anapc5/Ndc80/Cdc27/Ncaph2/Birc5/Aurkb/Mus81/Ttk/Cdc6/Smarcad1/Cenpe/Cdt1/Fbxo5/Eme1	33
BP	GO:0032886	regulation of microtubule-based process	60/2387	234/21092	7.13602e-10	1.11341e-07	8.79647e-08	Kif11/Kif11/Pak1/Mcph1/Rassf7/Terf1/Nubp1/Dctn1/Plk1/Pkd1/Senp6/Kif3a/Chmp4b/Mdm1/Spag5/Rassf1/Agrn/Kif18a/Ska3/Stil/Fam107a/Hdgfl3/Cyld/Map2/Cav3/Cep192/Gpsm2/Gen1/Prkaa1/Cib1/Tacc3/Mark4/Hnrnpu/Hnrnpu/Ckap2/Clip1/Parp3/Tpx2/Hdac6/Rac1/Dysf/Kifc1/Rae1/Ccnf/Mark2/Inpp5j/Tmem67/Ska2/Pde4dip/Phldb2/Map6/Abl1/Rhoa/Psrc1/Mid1/Smc3/Map1a/Cenpj/Nin/Camsap3	60
BP	GO:0031570	DNA integrity checkpoint	37/2387	112/21092	7.99371e-10	1.21525e-07	9.60109e-08	Rfwd3/Plk1/Brca1/Ticrr/Top2a/Timeless/Syf2/Babam2/Ccnd1/Hinfp/Cdkn1a/Dgkz/Map3k20/Usp28/Dtl/Blm/Gen1/Dna2/Abraxas1/Chek2/Rbm38/Orc1/Trp53bp1/E2f1/Mapk14/Pml/Atr/Fbxo31/Cdk1/Mus81/Pidd1/Cdc6/Thoc5/Nek11/Cdt1/Rad17/Eme1	37
BP	GO:1902806	regulation of cell cycle G1/S phase transition	40/2387	127/21092	8.38594e-10	1.23401e-07	9.7493e-08	Ptpn6/Slfn1/Slfn1/Slfn1/Slfn1/Rfwd3/Fhl1/Zc3h12d/Rbl1/Ccnd1/Fam83d/Mtbp/Fam107a/Cdkn1a/Dgkz/Ankrd17/Cyp1a1/Psme1/Rbm38/Ino80/Ube2e2/Haspin/E2f1/Pml/Hyal1/Ccnd3/Stxbp4/Larp7/E2f7/Fbxo31/Ctdspl/Men1/Men1/Cdkn2d/Pidd1/Fbxo7/Prmt2/Plcb1/Ezh2/Dbf4	40
BP	GO:0034502	protein localization to chromosome	31/2387	84/21092	8.53338e-10	1.23401e-07	9.7493e-08	Bub1b/Spdl1/Knl1/Tex15/Rpa1/Terf1/Plk1/Mtbp/Gnl3/Esco2/Cenpa/Terf2ip/Cenpq/Brca2/Ndc80/Parp3/Haspin/Cct2/Pml/Atrx/Tinf2/Atr/Hist1h1b/Aurkb/Cdk1/Tcp1/Ttk/Cdca5/Cdt1/Hdac8/Ezh2	31
BP	GO:2001251	negative regulation of chromosome organization	43/2387	145/21092	1.6218e-09	2.28944e-07	1.80878e-07	Pttg1/Bub1b/Atad2/Atad2/Spdl1/Trip13/Kdm4a/Terf1/Plk1/Kdm5a/Hnrnpc/Brca1/Mcrs1/Ccnb1/Top2a/Hist1h1a/Stil/Dnmt1/Mtbp/Cep192/Gen1/Zfp451/Bub1/Terf2ip/Zfp207/Bcor/Pax5/Hnrnpu/Hnrnpu/Ndc80/Pml/Atrx/Sin3a/Kdm4b/Tinf2/Hist1h1b/Birc5/Aurkb/Ttk/Cenpe/Cdt1/Fbxo5/Atg7	43
BP	GO:0033048	negative regulation of mitotic sister chromatid segregation	21/2387	44/21092	1.85632e-09	2.55957e-07	2.02219e-07	Pttg1/Bub1b/Spdl1/Trip13/Terf1/Plk1/Ccnb1/Stil/Mtbp/Cep192/Gen1/Bub1/Zfp207/Ndc80/Atrx/Birc5/Aurkb/Ttk/Cenpe/Cdt1/Fbxo5	21
BP	GO:0007091	metaphase/anaphase transition of mitotic cell cycle	24/2387	56/21092	2.01839e-09	2.71298e-07	2.14339e-07	Bub1b/Spdl1/Trip13/Terf1/Plk1/Ccnb1/Cit/Stil/Mtbp/Cep192/Gen1/Bub1/Zfp207/Tacc3/Anapc5/Ndc80/Cdc27/Birc5/Aurkb/Ttk/Cdc6/Cenpe/Cdt1/Fbxo5	24
BP	GO:0051290	protein heterotetramerization	23/2387	52/21092	2.0591e-09	2.71298e-07	2.14339e-07	Farsb/Hist1h3a/Hist1h4f/Agrn/Rrm2/Rrm1/Nrxn1/Insr/H2-Ke6/Cnga2/Nudt21/Hist2h3b/Nup54/Hist1h4b/Hist1h3h/Hist2h3c2/Hist2h3c1/Hist1h3g/Pdss2/Cpsf6/Cd74/Hist1h3i/Rcc1	23
BP	GO:0006281	DNA repair	93/2387	444/21092	2.55291e-09	3.29048e-07	2.59964e-07	Lig3/Dhx9/Palb2/Huwe1/Pttg1/Rfwd3/Rad51/Trip13/Tex15/Rpa1/Bard1/Aunip/Ube2n/Rad54l/Rad54b/Brca1/Pnp/Cenpx/Ticrr/Mcrs1/Neil3/Fen1/Msh3/Nsd2/Pole/Smc5/Timeless/Usp47/Parpbp/Rad51ap1/Babam2/Shprh/Foxm1/Esco2/Hinfp/Usp28/Dclre1a/Dtl/Blm/Rbm17/Smc2/Mms19/Gen1/Emsy/Dna2/Ddx11/Abraxas1/Pole2/Cdk9/Gtf2h5/Chek2/Fanci/Terf2ip/Smc6/Trp53bp1/Ino80/Brca2/Tonsl/Pclaf/Fanca/Egfr/Parp3/Psmd14/Fancd2/Marf1/Pml/Po…	93
BP	GO:2000816	negative regulation of mitotic sister chromatid separation	20/2387	41/21092	2.78401e-09	3.512e-07	2.77466e-07	Pttg1/Bub1b/Spdl1/Trip13/Terf1/Plk1/Ccnb1/Stil/Mtbp/Cep192/Gen1/Bub1/Zfp207/Ndc80/Birc5/Aurkb/Ttk/Cenpe/Cdt1/Fbxo5	20
BP	GO:0071900	regulation of protein serine/threonine kinase activity	89/2387	423/21092	4.4598e-09	5.50879e-07	4.35222e-07	Dab2/Ccne2/Ptpn6/Camk1/Ccne1/Pak1/Spag9/Spred2/Casp3/Plk1/Iqgap3/Map4k1/Prkcd/Agt/Ccnh/Ccnb1/Stk38/Cdkn2c/Madd/Kras/Dtnbp1/Map3k5/Ccnd1/Stil/Akap13/Ppp2ca/Arrb1/Cdkn1a/Nrxn1/Hyal2/Cks1b/Insr/Map3k20/Pla2g1b/Ccna2/Ptpn1/Blm/Tnfrsf11a/Cav3/Plce1/Vangl2/Pxn/Traf6/Cd81/Ccno/Ptprc/Ccnb2/Itga1/Cib1/Ajuba/Egfr/Tead1/Ager/Psen1/Fgd2/Dab2ip/Epha4/Trib3/Trib1/Ccnf/Ern1/Pde5a/Ccnd3/Actb/Syk/Tiam1/Lamtor3/Ml…	89
BP	GO:0045839	negative regulation of mitotic nuclear division	23/2387	54/21092	5.05423e-09	6.06151e-07	4.7889e-07	Pttg1/Bub1b/Nme6/Spdl1/Trip13/Terf1/Plk1/Ccnb1/Stil/Mtbp/Cep192/Gen1/Fgfr3/Bub1/Zfp207/Ndc80/Atrx/Birc5/Aurkb/Ttk/Cenpe/Cdt1/Fbxo5	23
BP	GO:0033046	negative regulation of sister chromatid segregation	21/2387	46/21092	5.11174e-09	6.06151e-07	4.7889e-07	Pttg1/Bub1b/Spdl1/Trip13/Terf1/Plk1/Ccnb1/Stil/Mtbp/Cep192/Gen1/Bub1/Zfp207/Ndc80/Atrx/Birc5/Aurkb/Ttk/Cenpe/Cdt1/Fbxo5	21
BP	GO:0051783	regulation of nuclear division	54/2387	211/21092	5.35891e-09	6.23e-07	4.92201e-07	Ccne2/Pttg1/Bub1b/Kif11/Kif11/Nme6/Spdl1/Ccne1/Nusap1/Trip13/Ube2c/Terf1/Plk1/Chmp4b/Ccnb1/Smc5/Cit/Ccnd1/Stil/Mtbp/Insr/Ccna2/Mki67/Cep192/Gen1/Fgfr3/Ccno/Ccnb2/Bub1/Zfp207/Tacc3/Anapc5/Hnrnpu/Hnrnpu/Ndc80/Sh2b1/Cdc27/Ccnf/Ccnd3/Atrx/Cdc20/Birc5/Aurkb/Ttk/Cdca5/Cdc6/Smc3/Plcb1/Kif20b/Cenpe/Rcc1/Cdt1/Fbxo5/Pdgfrb	54
BP	GO:1905818	regulation of chromosome separation	25/2387	63/21092	6.39689e-09	7.29369e-07	5.76238e-07	Pttg1/Bub1b/Spdl1/Trip13/Terf1/Plk1/Ccnb1/Cit/Stil/Mtbp/Cep192/Gen1/Bub1/Zfp207/Tacc3/Anapc5/Ndc80/Cdc27/Birc5/Aurkb/Ttk/Cdc6/Cenpe/Cdt1/Fbxo5	25
BP	GO:0044784	metaphase/anaphase transition of cell cycle	24/2387	59/21092	7.13833e-09	7.9855e-07	6.30895e-07	Bub1b/Spdl1/Trip13/Terf1/Plk1/Ccnb1/Cit/Stil/Mtbp/Cep192/Gen1/Bub1/Zfp207/Tacc3/Anapc5/Ndc80/Cdc27/Birc5/Aurkb/Ttk/Cdc6/Cenpe/Cdt1/Fbxo5	24
BP	GO:1905819	negative regulation of chromosome separation	20/2387	43/21092	7.93483e-09	8.71215e-07	6.88304e-07	Pttg1/Bub1b/Spdl1/Trip13/Terf1/Plk1/Ccnb1/Stil/Mtbp/Cep192/Gen1/Bub1/Zfp207/Ndc80/Birc5/Aurkb/Ttk/Cenpe/Cdt1/Fbxo5	20
BP	GO:0033674	positive regulation of kinase activity	95/2387	467/21092	8.15476e-09	8.79083e-07	6.9452e-07	Cd44/Dab2/Stap1/Ect2/Ptk2/Ranbp2/Dlg4/Camk1/Tab2/Pak1/Spag9/Vldlr/Iqgap3/Map4k1/Prkcd/Agt/Csf1/Ppp1r9a/Pfkfb2/Traf4/Madd/Kras/Prnp/Agrn/Map3k5/Ang/Pak6/Ccnd1/Stil/Akap13/Ppp2ca/Arrb1/Cdkn1a/Nrxn1/Chil1/Dgkz/Cks1b/Insr/Map3k20/Pla2g1b/Ptpn1/Tnfrsf11a/Rassf2/Plce1/Vangl2/Pxn/Traf6/Ncapg2/Cd81/Fgfr3/Ptprc/Nab2/Itga1/Cib1/Tnfsf15/Ajuba/Egfr/Tead1/Ager/Psen1/Tpx2/Fgd2/Dab2ip/Rac1/Epha4/Pibf1/Ern1/Pde5…	95
BP	GO:0065004	protein-DNA complex assembly	46/2387	170/21092	1.11794e-08	1.18362e-06	9.35118e-07	Cenpi/Rad51/Terf1/Hells/Cenpn/Hist1h3a/Senp6/Hist1h4f/Cenpx/Cenpk/Asf1b/Orc3/Shprh/A730008H23Rik/Hist1h1a/Smarca2/Hist1h2bb/Cenpa/Brd2/Psmc2/Cabin1/Hist1h3c/Gtf2h5/Wnt10b/Hist2h3b/Cenph/Hist1h2bk/Cenpc1/Naa60/Hist1h4b/Hist1h3h/Hist2h3c2/Hist2h3c1/Hist2h2bb/Hist1h3g/Atrx/Dr1/Cenpw/Hist1h2bm/Cenpp/Hist1h1b/Hist1h3i/Oip5/Cenpe/Cdt1/Med6	46
BP	GO:2000045	regulation of G1/S transition of mitotic cell cycle	35/2387	112/21092	1.17371e-08	1.22086e-06	9.64541e-07	Ptpn6/Slfn1/Slfn1/Slfn1/Slfn1/Rfwd3/Fhl1/Zc3h12d/Rbl1/Ccnd1/Mtbp/Fam107a/Cdkn1a/Dgkz/Ankrd17/Cyp1a1/Psme1/Rbm38/Ino80/Ube2e2/Haspin/E2f1/Pml/Hyal1/Ccnd3/Larp7/E2f7/Fbxo31/Ctdspl/Pidd1/Fbxo7/Prmt2/Plcb1/Ezh2/Dbf4	35
BP	GO:0031577	spindle checkpoint	19/2387	40/21092	1.21592e-08	1.2219e-06	9.65362e-07	Bub1b/Spdl1/Trip13/Terf1/Plk1/Ccnb1/Stil/Mtbp/Aurka/Cep192/Gen1/Bub1/Zfp207/Ndc80/Birc5/Aurkb/Ttk/Cenpe/Cdt1	19
BP	GO:0045841	negative regulation of mitotic metaphase/anaphase transition	19/2387	40/21092	1.21592e-08	1.2219e-06	9.65362e-07	Bub1b/Spdl1/Trip13/Terf1/Plk1/Ccnb1/Stil/Mtbp/Cep192/Gen1/Bub1/Zfp207/Ndc80/Birc5/Aurkb/Ttk/Cenpe/Cdt1/Fbxo5	19
BP	GO:0051052	regulation of DNA metabolic process	89/2387	434/21092	1.61897e-08	1.59981e-06	1.26393e-06	Lig3/Dhx9/Rlf/Mcidas/Rad51/Igfbp3/Tex15/Terf1/Aunip/E2f8/Ube2n/Prkcd/Hnrnpc/Brca1/Gata3/Pnp/Ticrr/Mcrs1/Msh3/Nsd2/Timeless/Wiz/Pparg/Parpbp/Rad51ap1/Babam2/Hist1h1a/Clcf1/Clcf1/Gsk3a/Foxm1/Dnmt1/Gnl3/Esco2/Cdkn1a/Ccna2/Ankrd17/Flcn/Blm/Mms19/Dna2/Ddx11/Abraxas1/Rfc5/Ptprc/Cdk9/Chek2/Terf2ip/Trp53bp1/Ino80/Brca2/Hnrnpu/Hnrnpu/Egfr/Parp3/Sh2b1/Rac1/Cct2/Pml/Ankle1/Smg1/Polq/Atrx/Tinf2/Atr/Rmi2/Hist…	89
BP	GO:0051985	negative regulation of chromosome segregation	21/2387	49/21092	2.0505e-08	1.99302e-06	1.57459e-06	Pttg1/Bub1b/Spdl1/Trip13/Terf1/Plk1/Ccnb1/Stil/Mtbp/Cep192/Gen1/Bub1/Zfp207/Ndc80/Atrx/Birc5/Aurkb/Ttk/Cenpe/Cdt1/Fbxo5	21
BP	GO:0071174	mitotic spindle checkpoint	18/2387	38/21092	3.11521e-08	2.97905e-06	2.3536e-06	Bub1b/Spdl1/Trip13/Terf1/Plk1/Ccnb1/Stil/Mtbp/Cep192/Gen1/Bub1/Zfp207/Ndc80/Birc5/Aurkb/Ttk/Cenpe/Cdt1	18
BP	GO:0006302	double-strand break repair	51/2387	204/21092	3.23766e-08	3.047e-06	2.40728e-06	Lig3/Palb2/Rfwd3/Rad51/Trip13/Tex15/Rpa1/Aunip/Ube2n/Rad54l/Rad54b/Brca1/Nsd2/Smc5/Timeless/Parpbp/Rad51ap1/Babam2/Foxm1/Esco2/Dclre1a/Blm/Mms19/Gen1/Dna2/Ddx11/Abraxas1/Chek2/Terf2ip/Smc6/Trp53bp1/Ino80/Brca2/Tonsl/Parp3/Psmd14/Marf1/Pml/Kdm2a/Polq/Paxx/Fan1/Rmi2/Brip1/Mus81/Sirt6/Cdca5/Fign/Smarcad1/Nabp1/Eme1	51
BP	GO:1902100	negative regulation of metaphase/anaphase transition of cell cycle	19/2387	42/21092	3.30658e-08	3.06323e-06	2.42011e-06	Bub1b/Spdl1/Trip13/Terf1/Plk1/Ccnb1/Stil/Mtbp/Cep192/Gen1/Bub1/Zfp207/Ndc80/Birc5/Aurkb/Ttk/Cenpe/Cdt1/Fbxo5	19
BP	GO:0051249	regulation of lymphocyte activation	86/2387	421/21092	3.38696e-08	3.08943e-06	2.4408e-06	Pglyrp1/Cd44/Icos/Ptpn6/Slfn1/Slfn1/Slfn1/Slfn1/Bank1/Lyst/Lck/Casp3/Zc3h12d/Arg2/Gata3/Nfkbiz/Pnp/Mef2c/Ctla2a/Prdm1/Nsd2/Sash3/Jak3/Myb/Btla/Slamf7/Prnp/Nckap1l/Nfatc2/Clcf1/Clcf1/Rc3h2/Nck1/Tnfrsf13c/Cdkn1a/Il20rb/Cyld/Blm/H2-Ab1/Sox11/Traf6/Flt3/Siglecg/Ticam1/Cd81/Ptprc/Runx1/Fcgr2b/Ikzf3/Trp53bp1/Fas/Tmem131l/Tnfrsf13b/Tnfrsf4/Fanca/Ager/Tnfsf13b/Pibf1/Zbtb16/Slamf1/Ccr2/Fancd2/Pde5a/Cyp26b…	86
BP	GO:1902807	negative regulation of cell cycle G1/S phase transition	25/2387	68/21092	3.9321e-08	3.53234e-06	2.79072e-06	Slfn1/Slfn1/Slfn1/Slfn1/Rfwd3/Fhl1/Zc3h12d/Rbl1/Ccnd1/Fam107a/Cdkn1a/Dgkz/Rbm38/Haspin/Pml/E2f7/Fbxo31/Ctdspl/Men1/Men1/Cdkn2d/Pidd1/Fbxo7/Prmt2/Ezh2	25
BP	GO:0045860	positive regulation of protein kinase activity	87/2387	430/21092	4.46384e-08	3.95016e-06	3.12083e-06	Dab2/Stap1/Ect2/Ptk2/Dlg4/Camk1/Tab2/Pak1/Spag9/Vldlr/Iqgap3/Map4k1/Prkcd/Agt/Csf1/Ppp1r9a/Traf4/Madd/Kras/Prnp/Agrn/Map3k5/Ang/Pak6/Ccnd1/Stil/Akap13/Ppp2ca/Arrb1/Cdkn1a/Nrxn1/Chil1/Cks1b/Insr/Map3k20/Pla2g1b/Ptpn1/Tnfrsf11a/Rassf2/Plce1/Vangl2/Pxn/Traf6/Ncapg2/Cd81/Ptprc/Nab2/Itga1/Cib1/Tnfsf15/Ajuba/Egfr/Tead1/Ager/Psen1/Tpx2/Fgd2/Dab2ip/Epha4/Pibf1/Ern1/Pde5a/Ccnd3/Cass4/Syk/Malt1/Tiam1/Map4k…	87
BP	GO:0032943	mononuclear cell proliferation	68/2387	309/21092	4.78479e-08	4.17191e-06	3.29602e-06	Cd44/Ptpn6/Slfn1/Slfn1/Slfn1/Slfn1/Cd180/Hells/Casp3/Cd151/Zc3h12d/Prkcd/Csf1/Arg2/Pnp/Mef2c/Prdm1/Sash3/Jak3/Btla/Prnp/Nckap1l/Nfatc2/Clcf1/Clcf1/Rc3h2/Nck1/Tnfrsf13c/Cdkn1a/Satb1/Il20rb/Blm/H2-Ab1/Sox11/Traf6/Flt3/Siglecg/Ticam1/Cd81/Ptprc/Fcgr2b/Ikzf3/Tmem131l/Tnfrsf13b/Tnfrsf4/Ager/Tnfsf13b/Slamf1/Ccr2/Pde5a/Ccnd3/Slc4a1/Efnb1/Itgb2/Syk/Malt1/Coro1a/H2-Aa/Il12a/Cd74/Abl1/Twsg1/Tlr9/Impdh1/Bcl…	68
BP	GO:0032944	regulation of mononuclear cell proliferation	55/2387	230/21092	4.93065e-08	4.23679e-06	3.34728e-06	Cd44/Ptpn6/Slfn1/Slfn1/Slfn1/Slfn1/Casp3/Zc3h12d/Csf1/Arg2/Pnp/Mef2c/Prdm1/Sash3/Jak3/Btla/Prnp/Nckap1l/Nfatc2/Clcf1/Clcf1/Nck1/Tnfrsf13c/Cdkn1a/Il20rb/Blm/H2-Ab1/Sox11/Traf6/Siglecg/Ticam1/Cd81/Ptprc/Fcgr2b/Ikzf3/Tmem131l/Tnfrsf13b/Tnfrsf4/Ager/Tnfsf13b/Slamf1/Ccr2/Pde5a/Slc4a1/Efnb1/Syk/Coro1a/H2-Aa/Il12a/Cd74/Twsg1/Tlr9/Bcl6/H2-T23/Glmn	55
BP	GO:0031331	positive regulation of cellular catabolic process	73/2387	341/21092	5.15233e-08	4.36402e-06	3.4478e-06	Dab2/Ptk2/Clec16a/Smurf1/Cnot7/Chfr/Cnot8/Igfbp3/Rchy1/Zbtb20/Arih1/Plk1/Git1/Zc3h12d/Mid2/Prkcd/Pnpt1/Fabp1/Trim21/Hnrnpr/Gsk3a/Csnk1e/Insr/Lrsam1/Flcn/Il33/Nanos1/Khsrp/Ptpn1/Aurka/Csnk1a1/Dnajb2/Sh3d19/Prkaa1/Ticam1/Cd81/Gck/Gpsm1/Ulk1/Psen2/Irgm1/Irgm1/Irgm1/Ager/Psen1/Adra1b/Hdac6/Dab2ip/Trib3/Trib1/Pum1/Pum1/Tnrc6c/Sumo3/Rgma/Rnf152/Ldlr/Usp13/Mettl3/Tmem67/Rab3gap1/Atpif1/Pabpc1/Rnf144b/Tr…	73
BP	GO:0006275	regulation of DNA replication	33/2387	108/21092	5.59153e-08	4.66932e-06	3.689e-06	Lig3/Dhx9/Mcidas/Terf1/E2f8/Ticrr/Msh3/Timeless/Wiz/Esco2/Ccna2/Ankrd17/Blm/Dna2/Rfc5/Chek2/Ino80/Brca2/Egfr/Rac1/Atrx/Atr/E2f7/Cdk1/Id3/Pds5a/Smc3/Cdt1/Dbf4/Rad17/Ehmt2/Fbxo5/Atg7	33
BP	GO:0051225	spindle assembly	32/2387	103/21092	5.71913e-08	4.70954e-06	3.72078e-06	Kif23/Kif11/Kif11/Plk1/Racgap1/Senp6/Flna/Chmp4b/Stard9/Spag5/Kif4/Aurka/Cep192/Gpsm2/Chek2/Ncor1/Zfp207/Ino80/Hnrnpu/Hnrnpu/Tpx2/Haus3/Pibf1/Kifc1/Aspm/Cdc20/Aurkb/Rhoa/Smc3/Mybl2/Rcc1/Fbxo5	32
BP	GO:0008608	attachment of spindle microtubules to kinetochore	16/2387	32/21092	6.98265e-08	5.67125e-06	4.48057e-06	Ect2/Knl1/Kif2c/Racgap1/Ccnb1/Spag5/Zfp207/Brca2/Hnrnpu/Hnrnpu/Cenpc1/Ndc80/Knstrn/Sgo1/Cenpe/Cdt1	16
BP	GO:0030071	regulation of mitotic metaphase/anaphase transition	21/2387	52/21092	7.19293e-08	5.7631e-06	4.55314e-06	Bub1b/Spdl1/Trip13/Terf1/Plk1/Ccnb1/Stil/Mtbp/Cep192/Gen1/Bub1/Zfp207/Anapc5/Ndc80/Birc5/Aurkb/Ttk/Cdc6/Cenpe/Cdt1/Fbxo5	21
BP	GO:0070661	leukocyte proliferation	70/2387	325/21092	7.49351e-08	5.92387e-06	4.68016e-06	Cd44/Ptpn6/Slfn1/Slfn1/Slfn1/Slfn1/Cd180/Hells/Casp3/Cd151/Zc3h12d/Prkcd/Csf1/Arg2/Pnp/Mef2c/Npr3/Prdm1/Sash3/Jak3/Btla/Prnp/Nckap1l/Nfatc2/Clcf1/Clcf1/Rc3h2/Nck1/Tnfrsf13c/Cdkn1a/Satb1/Il20rb/Il33/Blm/H2-Ab1/Sox11/Traf6/Flt3/Siglecg/Ticam1/Cd81/Ptprc/Fcgr2b/Ikzf3/Tmem131l/Tnfrsf13b/Tnfrsf4/Ager/Tnfsf13b/Slamf1/Ccr2/Pde5a/Ccnd3/Slc4a1/Efnb1/Itgb2/Syk/Malt1/Coro1a/H2-Aa/Il12a/Cd74/Abl1/Twsg1/Tlr9/…	70
BP	GO:0046651	lymphocyte proliferation	67/2387	307/21092	8.3753e-08	6.53384e-06	5.16206e-06	Cd44/Ptpn6/Slfn1/Slfn1/Slfn1/Slfn1/Cd180/Hells/Casp3/Cd151/Zc3h12d/Prkcd/Arg2/Pnp/Mef2c/Prdm1/Sash3/Jak3/Btla/Prnp/Nckap1l/Nfatc2/Clcf1/Clcf1/Rc3h2/Nck1/Tnfrsf13c/Cdkn1a/Satb1/Il20rb/Blm/H2-Ab1/Sox11/Traf6/Flt3/Siglecg/Ticam1/Cd81/Ptprc/Fcgr2b/Ikzf3/Tmem131l/Tnfrsf13b/Tnfrsf4/Ager/Tnfsf13b/Slamf1/Ccr2/Pde5a/Ccnd3/Slc4a1/Efnb1/Itgb2/Syk/Malt1/Coro1a/H2-Aa/Il12a/Cd74/Abl1/Twsg1/Tlr9/Impdh1/Bcl6/H2-…	67
BP	GO:0000086	G2/M transition of mitotic cell cycle	34/2387	115/21092	8.69987e-08	6.6989e-06	5.29247e-06	Fhl1/Plk1/Arpp19/Brca1/Ticrr/Ccnb1/Syf2/Usp47/Cit/Taf2/Ccnd1/Foxm1/Skp2/Skp2/Cdkn1a/Ccna2/Dtl/Blm/Lmnb1/Chek2/Wnt10b/Orc1/Cenpf/Cdk4/Mastl/Sin3a/Birc5/Cdk1/Cdc25c/Cdc6/Plcb1/Camk2d/Rad17/Fbxo5	34
BP	GO:0050670	regulation of lymphocyte proliferation	54/2387	228/21092	9.14289e-08	6.94977e-06	5.49067e-06	Cd44/Ptpn6/Slfn1/Slfn1/Slfn1/Slfn1/Casp3/Zc3h12d/Arg2/Pnp/Mef2c/Prdm1/Sash3/Jak3/Btla/Prnp/Nckap1l/Nfatc2/Clcf1/Clcf1/Nck1/Tnfrsf13c/Cdkn1a/Il20rb/Blm/H2-Ab1/Sox11/Traf6/Siglecg/Ticam1/Cd81/Ptprc/Fcgr2b/Ikzf3/Tmem131l/Tnfrsf13b/Tnfrsf4/Ager/Tnfsf13b/Slamf1/Ccr2/Pde5a/Slc4a1/Efnb1/Syk/Coro1a/H2-Aa/Il12a/Cd74/Twsg1/Tlr9/Bcl6/H2-T23/Glmn	54
BP	GO:0000079	regulation of cyclin-dependent protein serine/threonine kinase activity	25/2387	71/21092	1.05433e-07	7.91284e-06	6.25155e-06	Ccne2/Ccne1/Casp3/Plk1/Ccnh/Ccnb1/Cdkn2c/Ccnd1/Stil/Cdkn1a/Cks1b/Ccna2/Blm/Ccno/Ccnb2/Ccnf/Ccnd3/Actb/Men1/Men1/Cks2/Cdkn2d/Fbxo7/Psrc1/Cdc6	25
BP	GO:0048872	homeostasis of number of cells	67/2387	310/21092	1.23431e-07	9.14777e-06	7.2272e-06	Cd44/Atxn2/Tex15/Stat1/Rpa1/Casp3/Mthfd1/Col14a1/Csf1/Gata3/Kif3a/Mef2c/Sash3/Jak3/Myb/Kras/Tsc22d3/Sfxn1/Nckap1l/Prdx1/Rc3h2/Tnfrsf13c/Flvcr1/Ets1/Ildr2/Il20rb/Dnase2a/Cyld/Rassf2/Flt3/Klf2/Ncapg2/Dock10/Ccnb2/Hbb-b1/Tet2/Fcgr2b/Ncor1/Fas/Tnfrsf13b/Tnfrsf4/Epas1/Tnfsf13b/Jam3/Afdn/Rac1/Mapk14/Ikbkb/Ccr2/Senp1/Hba-a1/Prmt1/Add1/Atpif1/Coro1a/Slc40a1/Dock11/Cd74/Abl1/Men1/Men1/Bcl6/Heph/Plcb1/Ezh2…	67
BP	GO:0051607	defense response to virus	53/2387	226/21092	1.68433e-07	1.23289e-05	9.74043e-06	Apobec3/Dhx9/Cnot7/Lyst/Agbl5/Slfn8/Slfn8/Slfn8/Chuk/Stat1/Trim12a/Polr3f/Trim34a/Skp2/Skp2/Slfn9/Slfn9/Slfn9/Slfn9/Hyal2/Ncr1/Ankrd17/Il33/Tlr3/H2-Q7/Polr3c/Ticam1/Ptprc/Pcbp2/Ticam2/Spon2/Htra1/Pum1/Pum1/Pml/Pqbp1/Gbp4/Zmynd11/Prf1/Tlr8/Tlr7/Sin3a/Polr3e/Ddit4/Traf3/Abcf3/Cd37/Map3k14/Tlr9/Zc3hav1/Oasl2/Aim2/Atg7	53
BP	GO:0009615	response to virus	60/2387	270/21092	2.02122e-07	1.46144e-05	1.15461e-05	Apobec3/Dhx9/Cnot7/Lyst/Agbl5/Slfn8/Slfn8/Slfn8/Chuk/Hnrnpul1/Stat1/Trim12a/Polr3f/Trim34a/Skp2/Skp2/Slfn9/Slfn9/Slfn9/Slfn9/Hyal2/Ncr1/Ankrd17/Il33/Tlr3/H2-Q7/Flt3/Polr3c/Ticam1/Ptprc/Pcbp2/Ticam2/Spon2/Htra1/Ikbke/Mapk14/Pum1/Pum1/Pml/Hyal1/Pqbp1/Gbp4/Zmynd11/Prf1/Tlr8/Tlr7/Sin3a/Polr3e/Ddit4/Traf3/Abcf3/Il12a/Cd37/Map3k14/Tlr9/Zc3hav1/Oasl2/Aim2/Atg7/Batf3	60
BP	GO:0045862	positive regulation of proteolysis	69/2387	327/21092	2.11344e-07	1.50971e-05	1.19275e-05	Dab2/Ptk2/Smurf1/Chfr/Spon1/Lck/Stat1/Rchy1/Arih1/Aurkaip1/Plk1/Gramd4/Ctsh/Ifi27/Tnfsf10/Antxr1/Nlrp1a/Nlrp1a/Nlrp1a/Nlrp1a/Pparg/Map3k5/Gsk3a/Csnk1e/Ppp2ca/Dlc1/Arrb1/Il33/Aurka/Casp8ap2/Csnk1a1/Dnajb2/Ctnnd1/Ctnnd1/Sh3d19/Psme1/Tnfsf15/Acer2/Hip1/Fas/Usp50/Psen2/Psen1/Dab2ip/Epha4/Trib3/Trib1/Mapk14/Htra2/Sumo3/Rgma/Pml/Tbc1d10a/Senp1/Usp13/Tmem67/Atpif1/Rnf144b/Trim67/Men1/Men1/Cfl1/Pidd1/Rho…	69
BP	GO:0051784	negative regulation of nuclear division	23/2387	64/21092	2.20827e-07	1.53916e-05	1.21602e-05	Pttg1/Bub1b/Nme6/Spdl1/Trip13/Terf1/Plk1/Ccnb1/Stil/Mtbp/Cep192/Gen1/Fgfr3/Bub1/Zfp207/Ndc80/Atrx/Birc5/Aurkb/Ttk/Cenpe/Cdt1/Fbxo5	23
BP	GO:0070663	regulation of leukocyte proliferation	55/2387	240/21092	2.23444e-07	1.53916e-05	1.21602e-05	Cd44/Ptpn6/Slfn1/Slfn1/Slfn1/Slfn1/Casp3/Zc3h12d/Csf1/Arg2/Pnp/Mef2c/Prdm1/Sash3/Jak3/Btla/Prnp/Nckap1l/Nfatc2/Clcf1/Clcf1/Nck1/Tnfrsf13c/Cdkn1a/Il20rb/Blm/H2-Ab1/Sox11/Traf6/Siglecg/Ticam1/Cd81/Ptprc/Fcgr2b/Ikzf3/Tmem131l/Tnfrsf13b/Tnfrsf4/Ager/Tnfsf13b/Slamf1/Ccr2/Pde5a/Slc4a1/Efnb1/Syk/Coro1a/H2-Aa/Il12a/Cd74/Twsg1/Tlr9/Bcl6/H2-T23/Glmn	55
BP	GO:1902099	regulation of metaphase/anaphase transition of cell cycle	21/2387	55/21092	2.25069e-07	1.53916e-05	1.21602e-05	Bub1b/Spdl1/Trip13/Terf1/Plk1/Ccnb1/Stil/Mtbp/Cep192/Gen1/Bub1/Zfp207/Anapc5/Ndc80/Birc5/Aurkb/Ttk/Cdc6/Cenpe/Cdt1/Fbxo5	21
BP	GO:0051383	kinetochore organization	12/2387	20/21092	2.25851e-07	1.53916e-05	1.21602e-05	Cenpn/Senp6/Cenpx/Cenpk/Smc2/Cenpa/Cenph/Cenpc1/Ndc80/Cenpw/Cenpe/Cdt1	12
BP	GO:0000209	protein polyubiquitination	46/2387	187/21092	2.49428e-07	1.68052e-05	1.3277e-05	Huwe1/Smurf1/Chfr/Ube2c/Mkrn1/Bard1/Arih1/Ube2n/Brca1/Tmem129/Trim21/Syvn1/Shprh/Skp2/Skp2/Rc3h2/Rnf167/Ttc3/Lrsam1/Dtl/Ube2o/Rnf20/Traf6/Rbck1/Peli3/Nedd4/March1/Dzip3/Nhlrc1/Nmi/Anapc5/Ube2e2/Znrf1/Hdac6/G2e3/Jade2/Dysf/Cdc27/Rnf152/Ube2t/Peli2/Nhlrc3/Rnf144b/Rusc1/Plaa/Ube2g1	46
BP	GO:0044839	cell cycle G2/M phase transition	36/2387	131/21092	2.7929e-07	1.86057e-05	1.46994e-05	Fhl1/Plk1/Arpp19/Brca1/Ticrr/Ccnb1/Syf2/Usp47/Cit/Babam2/Taf2/Ccnd1/Foxm1/Skp2/Skp2/Cdkn1a/Ccna2/Dtl/Blm/Abraxas1/Lmnb1/Chek2/Wnt10b/Orc1/Cenpf/Cdk4/Mastl/Sin3a/Birc5/Cdk1/Cdc25c/Cdc6/Plcb1/Camk2d/Rad17/Fbxo5	36
BP	GO:0022411	cellular component disassembly	72/2387	349/21092	2.91544e-07	1.92063e-05	1.51739e-05	Smarcd2/Nsf/Clec16a/Smurf1/Cma1/Dhx8/Igfbp3/Kif2c/Atg12/Dctn1/Plk1/Ubqln4/Sh3bp1/Fen1/Top2a/Gabarap/Stx5a/Kif18a/Atg2a/Atg2a/Gsk3a/Ets1/Spast/Insr/Map1lc3b/Hdgfl3/Kif24/Arid1a/Dnase2a/Map2/Tmod2/Srebf1/Snapin/Usp30/Nckap5/Eif5a/Akap5/Cib1/Vps16/Ulk1/Mmp13/Sqstm1/Ckap2/Irgm1/Irgm1/Irgm1/Twf2/Hdac6/Dysf/Tpm1/Epha4/Kif18b/Ogfod1/Htra2/2810006K23Rik/Capg/Sh3gl2/Lamp2/Cln3/Dffb/Ddit4/Add1/Atpif1/Cdk1/…	72
BP	GO:0071902	positive regulation of protein serine/threonine kinase activity	60/2387	274/21092	3.4506e-07	2.2482e-05	1.77619e-05	Dab2/Camk1/Pak1/Spag9/Iqgap3/Map4k1/Prkcd/Agt/Madd/Kras/Map3k5/Ccnd1/Stil/Akap13/Ppp2ca/Arrb1/Nrxn1/Cks1b/Insr/Map3k20/Pla2g1b/Ptpn1/Tnfrsf11a/Plce1/Vangl2/Pxn/Traf6/Cd81/Ptprc/Itga1/Cib1/Ajuba/Egfr/Tead1/Ager/Psen1/Fgd2/Dab2ip/Epha4/Ern1/Pde5a/Ccnd3/Syk/Tiam1/Lamtor3/Mlkl/Slc27a1/Cd74/Tlr9/Cks2/Dvl2/Map2k6/Rhoa/Psrc1/Cdc6/Higd1a/Ezh2/Pdgfrb/Parp16/Map3k10	60
BP	GO:1904029	regulation of cyclin-dependent protein kinase activity	25/2387	75/21092	3.54009e-07	2.28143e-05	1.80245e-05	Ccne2/Ccne1/Casp3/Plk1/Ccnh/Ccnb1/Cdkn2c/Ccnd1/Stil/Cdkn1a/Cks1b/Ccna2/Blm/Ccno/Ccnb2/Ccnf/Ccnd3/Actb/Men1/Men1/Cks2/Cdkn2d/Fbxo7/Psrc1/Cdc6	25
BP	GO:0010212	response to ionizing radiation	35/2387	127/21092	3.77355e-07	2.40574e-05	1.90066e-05	Ect2/Rfwd3/Rad51/Rad54l/Rad54b/Brca1/Gata3/Pnp/Ticrr/Rad51ap1/Babam2/Cdkn1a/Tmem109/Map3k20/Usp28/Blm/Abraxas1/Prkaa1/Ptprc/Gtf2h5/Chek2/Ino80/Brca2/Mapk14/Brat1/Fancd2/Pml/Grb2/Atr/Tlk2/Ints3/Men1/Men1/Ddias/Nabp1	35
BP	GO:1903706	regulation of hemopoiesis	79/2387	398/21092	4.15224e-07	2.619e-05	2.06915e-05	Pglyrp1/Cd44/Wdr61/Ptpn6/Gnas/Lck/Stat1/Notch2/Csf1/Gata3/Hist1h4f/Nfkbiz/Pnp/Mef2c/Ctla2a/Prdm1/Sash3/Jak3/Myb/Nckap1l/Rc3h2/Ets1/Fbn1/Flcn/Nme2/Cyld/Rassf2/Pilrb1/Nudt21/Traf6/Flt3/Ncapg2/Fgfr3/Klf10/Eif6/Ptprc/Meis2/Runx1/Ikzf3/Cib1/Fas/Tmem131l/Dll1/Gpr171/Fanca/Ager/Hist1h4b/Trib1/Tfe3/Zbtb16/Mapk14/Ccr2/Fancd2/Meis1/Senp1/Cyp26b1/Ankle1/Mettl3/Prmt1/Syk/Malt1/Il34/H2-Aa/Tmem176a/Il12a/Cd74/…	79
BP	GO:0002683	negative regulation of immune system process	88/2387	459/21092	4.53678e-07	2.83143e-05	2.23697e-05	Pglyrp1/Cd44/Stap1/Wdr61/Ptpn6/Slfn1/Slfn1/Slfn1/Slfn1/Bank1/Cnot7/H2-Ob/Casp3/Zc3h12d/Spink5/Arg2/Hist1h4f/Klrb1b/Cd300lf/Prdm1/Klrk1/A2m/Jak3/Btla/Trafd1/Prnp/Pparg/Tsc22d3/Rc3h2/Fbn1/Col3a1/Il20rb/Il33/Nme2/Cyld/Cnr2/Pilrb1/H2-Ab1/Sox11/Tap2/Flt3/Siglecg/Ncapg2/Ptprc/Meis2/Runx1/Fcgr2b/Cib1/Pcbp2/Ticam2/Fas/Nmi/Tmem131l/Dll1/Gpr171/Htra1/Tnfrsf13b/Tnfrsf4/Hist1h4b/Dab2ip/Trib1/Pibf1/Zbtb16/Alo…	88
BP	GO:1901989	positive regulation of cell cycle phase transition	28/2387	91/21092	4.72966e-07	2.92106e-05	2.30778e-05	Ube2c/Ccnb1/Ccnd1/Fam83d/Mtbp/Ankrd17/Dtl/Cyp1a1/Lmnb1/Wnt10b/Anapc5/Ube2e2/Cdk4/Hyal1/Ccnd3/Sin3a/Stxbp4/Larp7/Birc5/Cdk1/Cdc25c/Cdca5/Plcb1/Cenpe/Cdt1/Ezh2/Dbf4/Fbxo5	28
BP	GO:0030010	establishment of cell polarity	36/2387	134/21092	5.11316e-07	3.12536e-05	2.46919e-05	Pard3/Frmd4b/Spdl1/Golph3/Pak1/Mcph1/Dctn1/Pkd1/Map4/Gata3/Sh3bp1/Spag5/Map2/Cenpa/Vangl2/Gpsm2/Dock7/Wdpcp/Mark4/Ndc80/Jam3/Amotl2/Frmd4a/Hey1/Mark2/Rufy3/Rictor/Cyp26b1/Kif26b/Coro7/Nde1/Cfl1/Rhoa/Myh9/Kif20b/Camsap3	36
BP	GO:0007094	mitotic spindle assembly checkpoint	16/2387	36/21092	5.44426e-07	3.26051e-05	2.57596e-05	Bub1b/Spdl1/Trip13/Terf1/Plk1/Ccnb1/Cep192/Gen1/Bub1/Zfp207/Ndc80/Birc5/Aurkb/Ttk/Cenpe/Cdt1	16
BP	GO:0071173	spindle assembly checkpoint	16/2387	36/21092	5.44426e-07	3.26051e-05	2.57596e-05	Bub1b/Spdl1/Trip13/Terf1/Plk1/Ccnb1/Cep192/Gen1/Bub1/Zfp207/Ndc80/Birc5/Aurkb/Ttk/Cenpe/Cdt1	16
BP	GO:0000077	DNA damage checkpoint	30/2387	102/21092	5.54667e-07	3.27229e-05	2.58528e-05	Rfwd3/Plk1/Brca1/Syf2/Babam2/Ccnd1/Hinfp/Cdkn1a/Dgkz/Map3k20/Usp28/Dtl/Blm/Gen1/Abraxas1/Chek2/Rbm38/Trp53bp1/E2f1/Mapk14/Pml/Atr/Fbxo31/Cdk1/Mus81/Pidd1/Thoc5/Nek11/Rad17/Eme1	30
BP	GO:0031109	microtubule polymerization or depolymerization	33/2387	118/21092	5.57432e-07	3.27229e-05	2.58528e-05	Pak1/Kif2c/Terf1/Dctn1/Cetn3/Kif18a/Ska3/Hdgfl3/Kif24/Map2/Cav3/Cep192/Nckap5/Cib1/Ckap2/Clip1/Hdac6/Rac1/Dysf/Kif18b/Efcab11/Inpp5j/Ska2/Pde4dip/Nde1/Abl1/Psrc1/Mid1/Map1a/Cenpj/Nin/Fbxo5/Camsap3	33
BP	GO:0071824	protein-DNA complex subunit organization	49/2387	210/21092	5.68518e-07	3.30465e-05	2.61084e-05	Smarcd2/Cenpi/Rad51/Terf1/Hells/Cenpn/Hist1h3a/Senp6/Hist1h4f/Cenpx/Cenpk/Asf1b/Orc3/Shprh/A730008H23Rik/Hist1h1a/Smarca2/Hist1h2bb/Arid1a/Cenpa/Brd2/Psmc2/Cabin1/Hist1h3c/Gtf2h5/Wnt10b/Hist2h3b/Cenph/Hist1h2bk/Ino80/Cenpc1/Naa60/Hist1h4b/Hist1h3h/Hist2h3c2/Hist2h3c1/Hist2h2bb/Hist1h3g/Atrx/Dr1/Cenpw/Hist1h2bm/Cenpp/Hist1h1b/Hist1h3i/Oip5/Cenpe/Cdt1/Med6	49
BP	GO:0051098	regulation of binding	78/2387	395/21092	6.07602e-07	3.49754e-05	2.76324e-05	Dab2/Runx1t1/Dhx9/Camk1/Spon1/Spag9/Nmd3/Aplp2/Plk1/Pkd1/Gata3/Mef2c/Hopx/Traf4/Pparg/Dtnbp1/Agrn/A730008H23Rik/Csnk1e/Lrpap1/Ppp2ca/Epb41/Crbn/Arrb1/Map1lc3b/Nfib/Cyld/Blm/Zfp90/Map2/Aurka/Fam192a/Csnk1a1/Aes/Dnajb2/Sox11/Traf6/Snapin/Ddx11/Ticam1/Cdk9/Pon1/Hoxa3/Gpsm1/Psen2/Eif3c/Hnrnpl/Ager/Psen1/Dab2ip/Dysf/Epha4/Trib3/E2f1/Sumo3/Rgma/Hey1/Mark2/Cdon/Sin3a/Sppl3/Eif3d/Atr/Actb/Tiam1/Add1/Larp…	78
BP	GO:0051310	metaphase plate congression	21/2387	58/21092	6.38111e-07	3.63784e-05	2.87408e-05	Spdl1/Kif2c/Chmp4b/Ccnb1/Spag5/Kif18a/Fam83d/Cenpq/Brca2/Hnrnpu/Hnrnpu/Cenpc1/Ndc80/Pibf1/Cenpf/Kif22/Cdca8/Cdca5/Psrc1/Cenpe/Cdt1	21
BP	GO:2000134	negative regulation of G1/S transition of mitotic cell cycle	22/2387	63/21092	7.13857e-07	4.03091e-05	3.18462e-05	Slfn1/Slfn1/Slfn1/Slfn1/Rfwd3/Fhl1/Zc3h12d/Rbl1/Ccnd1/Fam107a/Cdkn1a/Dgkz/Rbm38/Haspin/Pml/E2f7/Fbxo31/Ctdspl/Pidd1/Fbxo7/Prmt2/Ezh2	22
BP	GO:0030888	regulation of B cell proliferation	23/2387	68/21092	7.69074e-07	4.30174e-05	3.39859e-05	Casp3/Mef2c/Prdm1/Sash3/Btla/Nckap1l/Nfatc2/Clcf1/Clcf1/Tnfrsf13c/Cdkn1a/Siglecg/Ticam1/Cd81/Ptprc/Fcgr2b/Ikzf3/Tnfrsf13b/Tnfrsf4/Tnfsf13b/Cd74/Tlr9/Bcl6	23
BP	GO:0060968	regulation of gene silencing	27/2387	88/21092	8.02286e-07	4.42879e-05	3.49897e-05	Dhx9/Atad2/Atad2/Nfkb1/Hist1h3a/Uty/Wtip/Pparg/Hist1h1a/Dnmt1/Hist2h3b/Ncor1/Ajuba/Ddx5/Egfr/Hist1h3h/Pum1/Pum1/Tnrc6c/Hist2h3c2/Hist2h3c1/Hist1h3g/Sin3a/Hist1h1b/Sirt6/Hist1h3i/Zfp36	27
BP	GO:0034508	centromere complex assembly	14/2387	29/21092	8.06728e-07	4.42879e-05	3.49897e-05	Cenpi/Hells/Cenpn/Senp6/Cenpx/Cenpk/A730008H23Rik/Cenpa/Cenph/Cenpc1/Cenpw/Cenpp/Oip5/Cenpe	14
BP	GO:1901992	positive regulation of mitotic cell cycle phase transition	25/2387	78/21092	8.19194e-07	4.45597e-05	3.52044e-05	Ube2c/Ccnb1/Ccnd1/Mtbp/Ankrd17/Dtl/Cyp1a1/Lmnb1/Wnt10b/Anapc5/Ube2e2/Cdk4/Hyal1/Ccnd3/Sin3a/Larp7/Birc5/Cdk1/Cdc25c/Cdca5/Plcb1/Cenpe/Cdt1/Dbf4/Fbxo5	25
BP	GO:0045926	negative regulation of growth	60/2387	281/21092	8.46411e-07	4.56216e-05	3.60433e-05	Dab2/Ptk2/Atxn2/Nme6/Pak1/Gnas/Sema3a/Fhl1/Ulk2/Osgin1/Notch2/Zc3h12d/Agt/Pnpt1/Scd1/Cdkn2c/Pparg/Bcl11a/Gsk3a/Cth/Cdkn1a/Smarca2/Hyal2/Nppa/Tbx5/Alms1/Plac8/Flcn/Map2/Cav3/Wnt11/Dnajb2/Spg20/Fgfr3/Ulk1/Idh3g/Sqstm1/Mbl1/Dab2ip/Rgma/Pml/Meis1/Hyal1/Ing4/Rbbp7/Ifrd1/Socs2/Ccr5/Rgs2/Slit2/Men1/Men1/Cfl1/Bcl6/Cdkn2d/Nf2/Psrc1/Sema4d/Sema3f/Sema6a	60
BP	GO:0071459	protein localization to chromosome, centromeric region	12/2387	22/21092	9.32023e-07	4.97835e-05	3.93315e-05	Bub1b/Spdl1/Knl1/Mtbp/Cenpa/Cenpq/Ndc80/Haspin/Aurkb/Cdk1/Ttk/Cdt1	12
BP	GO:0006323	DNA packaging	41/2387	166/21092	9.78956e-07	5.18235e-05	4.09432e-05	Mcph1/Nusap1/Hells/Ncapd2/Hist1h3a/Hist1h4f/Ccnb1/Top2a/Asf1b/Shprh/A730008H23Rik/Hist1h1a/Smarca2/Hist1h2bb/Smc2/Cenpa/Brd2/Ncapg2/Cabin1/Hist1h3c/Hist2h3b/Hist1h2bk/Naa60/Hist1h4b/Hist1h3h/Hist2h3c2/Hist2h3c1/Hist2h2bb/Ncapg/Hist1h3g/Atrx/Dffb/Hist1h2bm/Ncaph2/Cenpp/Hist1h1b/Cdk1/Sirt6/Hist1h3i/Cdca5/Oip5	41
BP	GO:0009896	positive regulation of catabolic process	78/2387	407/21092	2.03777e-06	0.00010692	8.44723e-05	Dab2/Ptk2/Nsf/Clec16a/Smurf1/Cnot7/Chfr/Cnot8/Igfbp3/Rchy1/Zbtb20/Arih1/Plk1/Git1/Zc3h12d/Mid2/Prkcd/Pnpt1/Fabp1/Trim21/Hnrnpr/Stx5a/Gsk3a/Csnk1e/Snf8/Insr/Lrsam1/Flcn/Il33/Nanos1/Khsrp/Ptpn1/Dtl/Aurka/Csnk1a1/Dnajb2/Sh3d19/Nedd4/Prkaa1/Ticam1/Cd81/Gck/Gpsm1/Ulk1/Psen2/Irgm1/Irgm1/Irgm1/Ager/Psen1/Adra1b/Hdac6/Dab2ip/Trib3/Trib1/Pum1/Pum1/Tnrc6c/Sumo3/Rgma/Rnf152/Ldlr/Usp13/Mettl3/Tmem67/Rab3gap1…	78
BP	GO:0045931	positive regulation of mitotic cell cycle	40/2387	165/21092	2.18644e-06	0.000113714	8.984e-05	Eif4ebp1/Nusap1/Ube2c/Terf1/Ccnb1/Smc5/Ccnd1/Mtbp/Insr/Ankrd17/Dtl/Cyp1a1/Gen1/Meis2/Lmnb1/Wnt10b/Anapc5/Ube2e2/Brca2/Hnrnpu/Hnrnpu/Ndc80/Sh2b1/Cdk4/Hyal1/Ccnd3/Sin3a/Larp7/Birc5/Cdk1/Cdc25c/Abl1/Cdca5/Plcb1/Kif20b/Cenpe/Cdt1/Dbf4/Fbxo5/Pdgfrb	40
BP	GO:0051056	regulation of small GTPase mediated signal transduction	54/2387	251/21092	2.30543e-06	0.00011886	9.39054e-05	Ect2/Mcf2l/Notch2/Git1/Arpp19/Csf1/Sh3bp1/Spata13/F2rl3/Madd/Kras/Itga3/Foxm1/Akap13/Mapkap1/Itsn1/Dlc1/Arrb1/Cyth2/Dgkz/Col3a1/Flcn/Arhgef1/P2ry10/Plce1/Trio/Plekhg2/Ralgps1/Cdc42bpa/Adra1b/Fgd2/Arhgef28/Dab2ip/Fgd1/Cyth4/Arhgap24/Cdon/Arhgef25/Arhgap42/Sipa1l1/Arhgap19/Tiam1/Map4k4/Trim67/Arhgef6/Slit2/Eps8l2/Abl1/Bcl6/P2ry10b/Camk2d/Pdgfrb/Arhgap25/F2rl2	54
BP	GO:0051303	establishment of chromosome localization	24/2387	77/21092	2.36639e-06	0.000120951	9.55576e-05	Spdl1/Kif2c/Terf1/Chmp4b/Ccnb1/Spag5/Kif18a/Fam83d/Cenpq/Brca2/Hnrnpu/Hnrnpu/Cenpc1/Ndc80/Pibf1/Cenpf/Kif22/Birc5/Cdca8/Nde1/Cdca5/Psrc1/Cenpe/Cdt1	24
BP	GO:0071103	DNA conformation change	47/2387	208/21092	2.49536e-06	0.000126453	9.99043e-05	Dhx9/Mcph1/Rad51/Nusap1/Rpa1/Hells/Ncapd2/Hist1h3a/Hist1h4f/Ccnb1/Top2a/Asf1b/Shprh/A730008H23Rik/Hist1h1a/Smarca2/Hist1h2bb/Blm/Smc2/Cenpa/Brd2/Ddx11/Mcm7/Ncapg2/Cabin1/Hist1h3c/Hist2h3b/Hist1h2bk/Naa60/Hist1h4b/Hist1h3h/Hist2h3c2/Hist2h3c1/Hist2h2bb/Ncapg/Hist1h3g/Atrx/Dffb/Hist1h2bm/Ncaph2/Cenpp/Hist1h1b/Cdk1/Sirt6/Hist1h3i/Cdca5/Oip5	47
BP	GO:0007264	small GTPase mediated signal transduction	87/2387	472/21092	2.85012e-06	0.000143206	0.00011314	Ect2/Celsr1/Rhobtb1/Mcf2l/Chuk/Notch2/Git1/Arpp19/Iqgap3/Baiap2/Csf1/Sh3bp1/Spata13/F2rl3/Madd/Kras/Rassf1/Rab14/Rit1/Itga3/Foxm1/Akap13/Mapkap1/Dnmt1/Itsn1/Dlc1/Arrb1/Cyth2/Dgkz/Usp28/Col3a1/Flcn/Arhgef1/P2ry10/Ednra/Plce1/Vangl2/Gpsm2/Trio/Dock10/Plekhg2/Dock7/Hacd3/Ralgps1/Ulk1/Usp50/Rhoq/Cdc42bpa/Adra1b/Fgd2/Arhgef28/Dab2ip/Rac1/Fgd1/Cyth4/Arhgap24/Cdon/Arhgef25/Arhgap42/Grb2/Sipa1l1/Arhgap19…	87
BP	GO:0120031	plasma membrane bounded cell projection assembly	90/2387	493/21092	2.91715e-06	0.000145343	0.000114828	Tbc1d30/Stap1/Ift43/Mcidas/Sept10/Golph3/Ttc8/Unc119b/Kctd17/Bbs10/Dctn1/Arap1/Itprip/Map4/Prkcd/Anln/Ablim1/Kif3a/Flna/Hyls1/Sh3bp1/Ppp1r9a/Stk36/Spata13/Emp1/C2cd3/Agrn/Ssh3/Nudcd3/Stil/Nck1/Tacstd2/Nrxn1/Cfap53/Stau2/Alms1/Kif24/Nup85/Cyld/Trove2/Vangl2/Pxn/Wdr90/Ccno/Wdpcp/Ajuba/Nphp3/Ptpdc1/Tmem107/Ccdc103/Mark4/Ttll5/Rhoq/B9d2/Twf2/Sh2b1/Rac1/Odf2l/Fgd1/Pibf1/Arhgap24/Arhgef26/Pqbp1/Cfap44/…	90
BP	GO:0090307	mitotic spindle assembly	21/2387	63/21092	3.00921e-06	0.00014868	0.000117465	Kif23/Kif11/Kif11/Plk1/Racgap1/Flna/Chmp4b/Kif4/Cep192/Chek2/Zfp207/Hnrnpu/Hnrnpu/Tpx2/Pibf1/Kifc1/Cdc20/Aurkb/Rhoa/Smc3/Mybl2	21
BP	GO:0050000	chromosome localization	24/2387	78/21092	3.05404e-06	0.000149648	0.000118229	Spdl1/Kif2c/Terf1/Chmp4b/Ccnb1/Spag5/Kif18a/Fam83d/Cenpq/Brca2/Hnrnpu/Hnrnpu/Cenpc1/Ndc80/Pibf1/Cenpf/Kif22/Birc5/Cdca8/Nde1/Cdca5/Psrc1/Cenpe/Cdt1	24
BP	GO:0034501	protein localization to kinetochore	10/2387	17/21092	3.09859e-06	0.000150586	0.000118971	Spdl1/Knl1/Mtbp/Cenpq/Ndc80/Haspin/Aurkb/Cdk1/Ttk/Cdt1	10
BP	GO:1902903	regulation of supramolecular fiber organization	68/2387	346/21092	3.70484e-06	0.000177297	0.000140074	Eln/Rhobtb1/Pak1/Ttc8/Terf1/Dctn1/Arap1/Prkcd/Baiap2/Mef2c/Flna/Sh3bp1/Ppp1r9a/Cit/Nckap1l/Ssh3/Akap13/Nck1/Tacstd2/Dlc1/Alms1/Hdgfl3/Map2/Cav3/Tmod2/Wnt11/Pxn/Plekhg2/Shank1/Cib1/Actr3b/Ckap2/Psen1/Clip1/Twf2/Hdac6/Rac1/Dysf/Tpm1/Gmfg/Alox15/Gmfb/Rictor/Capg/Ldlr/Inpp5j/Grb2/Pde4dip/Phldb2/Add1/Synpo/Coro1a/Pfn1/Carmil1/Slit2/Abl1/Cfl1/Rapgef3/Rhoa/Nf2/Cdc42ep4/Psrc1/Mid1/Map1a/Nin/Icam1/Pecam1/…	68
BP	GO:0031023	microtubule organizing center organization	35/2387	139/21092	3.70801e-06	0.000177297	0.000140074	Kif11/Kif11/Mcph1/Nubp1/Dctn1/Plk1/Brca1/Kif3a/Cetn3/Chmp4b/Mdm1/C2cd3/Stil/Aurka/Cep192/Gen1/Calml4/Mark4/Brca2/Cntln/Pclaf/Haus3/Wdr62/Kifc1/Ccnf/Chd3/Efcab11/Tmem67/Deup1/Syne2/Nde1/Sgo1/Cenpj/Nin/Cep68	35
BP	GO:0043161	proteasome-mediated ubiquitin-dependent protein catabolic process	72/2387	373/21092	3.80981e-06	0.000180707	0.000142768	Dab2/Clec16a/Smurf1/Chfr/Fbxl21/Ube2c/Kctd17/Rchy1/Arih1/Rnf103/Plk1/Ubqln4/Fbxl4/Psmb6/Armc8/Tmem129/Syvn1/Gsk3a/Csnk1e/Skp2/Skp2/Crbn/Arrb1/Il33/Aurka/Usp14/Csnk1a1/Dnajb2/Rbck1/Man1b1/Nedd4/Wnt10b/Pcbp2/Nhlrc1/Psmd4/Arntl/Psen2/Anapc5/Psen1/Znrf1/Psmd14/Trib3/Trib1/Amn1/Ccnf/Nrros/Lrrc29/Pml/Senp1/Ankzf1/Tmem67/Cdc20/Fbxl3/Edem3/Nhlrc3/Rnf144b/Ubxn11/Fbxo31/Dcaf11/Tlk2/Commd1/Sec13/Glmn/Jkamp/…	72
BP	GO:0010498	proteasomal protein catabolic process	81/2387	436/21092	4.55545e-06	0.000214359	0.000169355	Dab2/Clec16a/Smurf1/Chfr/Fbxl21/Ube2c/Kctd17/Rchy1/Arih1/Rnf103/Plk1/Pkd1/Ubqln4/Fbxl4/Psmb6/Armc8/Tmem129/Sel1l/Rhbdf1/Syvn1/Gsk3a/Csnk1e/Skp2/Skp2/Crbn/Arrb1/Sdf2/Il33/Aurka/Usp14/Fam192a/Csnk1a1/Dnajb2/Psme1/Rbck1/Man1b1/Nedd4/Wnt10b/Pcbp2/Nhlrc1/Psmd4/Arntl/Psen2/Anapc5/Psen1/Znrf1/Dab2ip/Psmd14/Trib3/Trib1/Amn1/Ccnf/Nrros/Lrrc29/Pml/Senp1/Ankzf1/Usp13/Tmem67/Dnajb12/Cdc20/Fbxl3/Edem3/Nhlrc3/…	81
BP	GO:0007265	Ras protein signal transduction	76/2387	403/21092	5.06752e-06	0.000236577	0.000186908	Ect2/Celsr1/Rhobtb1/Mcf2l/Chuk/Notch2/Git1/Arpp19/Iqgap3/Baiap2/Csf1/Spata13/F2rl3/Madd/Kras/Rassf1/Rab14/Rit1/Itga3/Foxm1/Akap13/Mapkap1/Dnmt1/Itsn1/Dlc1/Arrb1/Cyth2/Dgkz/Usp28/Col3a1/Flcn/Arhgef1/P2ry10/Ednra/Plce1/Vangl2/Gpsm2/Trio/Plekhg2/Hacd3/Ralgps1/Ulk1/Usp50/Rhoq/Adra1b/Fgd2/Arhgef28/Dab2ip/Rac1/Fgd1/Cyth4/Arhgap24/Arhgef25/Arhgap42/Grb2/Rab6b/Tiam1/Map4k4/Trim67/Arhgef6/Cnksr1/Arhgef11/…	76
BP	GO:0007098	centrosome cycle	32/2387	124/21092	5.46015e-06	0.000252916	0.000199816	Kif11/Kif11/Mcph1/Nubp1/Dctn1/Plk1/Brca1/Kif3a/Chmp4b/Mdm1/C2cd3/Stil/Aurka/Cep192/Gen1/Mark4/Brca2/Cntln/Pclaf/Haus3/Wdr62/Kifc1/Ccnf/Chd3/Tmem67/Deup1/Syne2/Nde1/Sgo1/Cenpj/Nin/Cep68	32
BP	GO:0046634	regulation of alpha-beta T cell activation	28/2387	102/21092	5.80205e-06	0.00026667	0.000210682	Cd44/Arg2/Gata3/Nfkbiz/Pnp/Prdm1/Sash3/Jak3/Myb/Btla/Nckap1l/Rc3h2/Blm/H2-Ab1/Ptprc/Runx1/Ager/Zbtb16/Ccr2/Syk/Malt1/Il12a/Il2rg/Twsg1/Bcl6/H2-T23/Ap3b1/Rhoa	28
BP	GO:0007163	establishment or maintenance of cell polarity	46/2387	208/21092	5.84709e-06	0.000266672	0.000210685	Pard3/Frmd4b/Spdl1/Golph3/Pak1/Mcph1/Kif2c/Dctn1/Pkd1/Map4/Cap1/Gata3/Kif3a/Sh3bp1/Spag5/Nckap1l/Mapkap1/Map2/Cenpa/Vangl2/Wnt11/Gpsm2/Dock7/Fat1/Wdpcp/Nphp3/Mark4/Rhoq/Ndc80/Jam3/Amotl2/Frmd4a/Hey1/Mark2/Rufy3/Rictor/Cyp26b1/Kif26b/Syne2/Coro7/Nde1/Cfl1/Rhoa/Myh9/Kif20b/Camsap3	46
BP	GO:1902275	regulation of chromatin organization	43/2387	190/21092	6.28166e-06	0.000284305	0.000224616	Wdr61/Atad2/Atad2/Tlk1/Kdm4a/Ube2n/Uty/Kdm5a/Brca1/Gata3/Ccnb1/Myb/Hist1h1a/Dnmt1/Arrb1/Phf19/Flcn/Mki67/Paxbp1/Srebf1/Rnf20/Zfp451/Cdk9/Ncor1/Bcor/Pax5/Hnrnpu/Hnrnpu/Snw1/Pml/Kdm2a/Atrx/Sin3a/Kdm4b/Hist1h1b/Tlk2/Men1/Men1/Bcl6/Sirt6/BC004004/Ehmt2/Atg7	43
BP	GO:0051262	protein tetramerization	39/2387	166/21092	6.53438e-06	0.000293502	0.000231882	Pkm/Hcn1/Farsb/Hist1h3a/Pfkp/Hist1h4f/Cbr2/Agrn/Rrm2/Rrm1/Cth/Nrxn1/Insr/H2-Ke6/Cnga2/Trpv6/Nudt21/Gls/Tk1/Gnmt/Hist2h3b/Nup54/Mbl1/Srr/Hist1h4b/Hist1h3h/Hist2h3c2/Hist2h3c1/Gbp5/Hist1h3g/Mtmr2/Apip/Pdss2/Cpsf6/Cd74/Hist1h3i/Acads/Cd79a/Rcc1	39
BP	GO:0051382	kinetochore assembly	9/2387	15/21092	7.9268e-06	0.000353368	0.000279179	Cenpn/Senp6/Cenpx/Cenpk/Cenpa/Cenph/Cenpc1/Cenpw/Cenpe	9
BP	GO:0072698	protein localization to microtubule cytoskeleton	18/2387	52/21092	8.30699e-06	0.000363433	0.00028713	Mcph1/Mid2/Spag5/C2cd3/Nudcd3/Stil/Fam83d/Aurka/Cep192/Mark4/Hnrnpu/Hnrnpu/Pibf1/Hook3/Ttk/Mid1/Kif20b/Map1a	18
BP	GO:0000724	double-strand break repair via homologous recombination	30/2387	115/21092	8.39776e-06	0.000363433	0.00028713	Palb2/Rfwd3/Rad51/Tex15/Rpa1/Aunip/Ube2n/Rad54l/Rad54b/Brca1/Smc5/Parpbp/Rad51ap1/Blm/Mms19/Gen1/Terf2ip/Smc6/Trp53bp1/Ino80/Brca2/Tonsl/Psmd14/Polq/Fan1/Rmi2/Mus81/Sirt6/Fign/Nabp1	30
BP	GO:0000725	recombinational repair	30/2387	115/21092	8.39776e-06	0.000363433	0.00028713	Palb2/Rfwd3/Rad51/Tex15/Rpa1/Aunip/Ube2n/Rad54l/Rad54b/Brca1/Smc5/Parpbp/Rad51ap1/Blm/Mms19/Gen1/Terf2ip/Smc6/Trp53bp1/Ino80/Brca2/Tonsl/Psmd14/Polq/Fan1/Rmi2/Mus81/Sirt6/Fign/Nabp1	30
BP	GO:0043500	muscle adaptation	30/2387	115/21092	8.39776e-06	0.000363433	0.00028713	Ptk2/Pak1/Kdm4a/Mef2a/Tbce/Agt/Col14a1/Mef2c/Gatm/Gatm/Fdps/Gsk3a/Nppa/Trip10/Cav3/Camta2/Gtf2i/Cdk9/Tead1/Gtf2ird1/Nfatc1/Pde5a/Errfi1/Inpp5f/Klf15/Rgs2/Wisp1/Gtf2ird2/Ezh2/Camk2d	30
BP	GO:0050863	regulation of T cell activation	60/2387	301/21092	8.56207e-06	0.000367859	0.000290627	Cd44/Icos/Ptpn6/Slfn1/Slfn1/Slfn1/Slfn1/Lck/Casp3/Zc3h12d/Arg2/Gata3/Nfkbiz/Pnp/Ctla2a/Prdm1/Sash3/Jak3/Myb/Btla/Prnp/Nckap1l/Rc3h2/Nck1/Tnfrsf13c/Il20rb/Cyld/Blm/H2-Ab1/Traf6/Ptprc/Runx1/Tmem131l/Fanca/Ager/Tnfsf13b/Zbtb16/Slamf1/Ccr2/Fancd2/Pde5a/Cyp26b1/Slc4a1/Mettl3/Efnb1/Syk/Malt1/Coro1a/H2-Aa/Il12a/Cd74/Il2rg/Zeb1/Abl1/Twsg1/Bcl6/H2-T23/Ap3b1/Rhoa/Glmn	60
BP	GO:0006333	chromatin assembly or disassembly	35/2387	144/21092	8.64465e-06	0.000368735	0.000291319	Smarcd2/Tlk1/Hells/Hist1h3a/Hist1h4f/Asf1b/Shprh/A730008H23Rik/Hist1h1a/Smarca2/Hist1h2bb/Arid1a/Cenpa/Brd2/Chd1/Cabin1/Hist1h3c/Hist2h3b/Hist1h2bk/Naa60/Hist1h4b/Hist1h3h/Hist2h3c2/Hist2h3c1/Hist2h2bb/Chd3/Hist1h3g/Atrx/Hist1h2bm/Cenpp/Hist1h1b/Tlk2/Sirt6/Hist1h3i/Oip5	35
BP	GO:0007080	mitotic metaphase plate congression	16/2387	43/21092	9.09907e-06	0.000385346	0.000304443	Spdl1/Kif2c/Chmp4b/Ccnb1/Kif18a/Hnrnpu/Hnrnpu/Cenpc1/Ndc80/Pibf1/Kif22/Cdca8/Cdca5/Psrc1/Cenpe/Cdt1	16
BP	GO:0007266	Rho protein signal transduction	43/2387	193/21092	9.54168e-06	0.000398399	0.000314755	Ect2/Celsr1/Rhobtb1/Mcf2l/Chuk/Baiap2/Spata13/F2rl3/Itga3/Akap13/Itsn1/Dlc1/Arrb1/Col3a1/Flcn/Arhgef1/P2ry10/Ednra/Vangl2/Trio/Plekhg2/Hacd3/Rhoq/Adra1b/Fgd2/Arhgef28/Rac1/Fgd1/Arhgef25/Arhgap42/Tiam1/Arhgef6/Cnksr1/Arhgef11/Eps8l2/Abl1/Bcl6/Rhoa/P2ry10b/Cdc42ep4/Pecam1/Pdgfrb/F2rl2	43
BP	GO:1903046	meiotic cell cycle process	43/2387	193/21092	9.54168e-06	0.000398399	0.000314755	Ccne2/Pttg1/Bub1b/Ccne1/Rad51/Trip13/Tex15/Nsun2/Terf1/Plk1/Ncapd2/Cenpx/Msh3/Mybl1/Top2a/Kif18a/Blm/Aurka/Grb14/Smc2/Bub1/Brca2/Cenpc1/Fanca/Aspm/Fancd2/Marf1/Cyp26b1/Mastl/Atrx/Ncaph2/Cdc20/Brip1/Mus81/Cdc25c/Ttk/Cks2/Sgo1/Myh9/Plcb1/Ehmt2/Fbxo5/Eme1	43
BP	GO:0045005	DNA-dependent DNA replication maintenance of fidelity	15/2387	39/21092	1.08102e-05	0.000448209	0.000354108	Rfwd3/Rad51/Cenpx/Msh3/Pole/Timeless/Blm/Gen1/Dna2/Ddx11/Cdk9/Brca2/Tonsl/Atrx/Eme1	15
BP	GO:0007159	leukocyte cell-cell adhesion	62/2387	317/21092	1.14124e-05	0.000469888	0.000371235	Cd44/Podxl2/Icos/Ptpn6/Slfn1/Slfn1/Slfn1/Slfn1/Golph3/Lck/Casp3/Zc3h12d/Arg2/Gata3/Nfkbiz/Pnp/Sash3/Jak3/Myb/Btla/Prnp/Nckap1l/Rc3h2/Nck1/Tnfrsf13c/Ets1/Il20rb/Cyld/Blm/H2-Ab1/Traf6/Ptprc/Runx1/Wnk1/Tmem131l/Nt5e/Ager/Tnfsf13b/Zbtb16/Slamf1/Ccr2/Pde5a/Slc4a1/Efnb1/Itgb2/Syk/Malt1/Coro1a/H2-Aa/Il12a/Cd74/Il2rg/Twsg1/Bcl6/Fermt3/H2-T23/Ap3b1/Rhoa/Glmn/Sema4d/Icam1/Pecam1	62
BP	GO:0044380	protein localization to cytoskeleton	19/2387	58/21092	1.17263e-05	0.000479484	0.000378817	Mcph1/Mid2/Anln/Spag5/C2cd3/Nudcd3/Stil/Fam83d/Aurka/Cep192/Mark4/Hnrnpu/Hnrnpu/Pibf1/Hook3/Ttk/Mid1/Kif20b/Map1a	19
BP	GO:0006334	nucleosome assembly	27/2387	100/21092	1.18083e-05	0.000479529	0.000378852	Hist1h3a/Hist1h4f/Asf1b/Shprh/A730008H23Rik/Hist1h1a/Smarca2/Hist1h2bb/Cenpa/Brd2/Cabin1/Hist1h3c/Hist2h3b/Hist1h2bk/Naa60/Hist1h4b/Hist1h3h/Hist2h3c2/Hist2h3c1/Hist2h2bb/Hist1h3g/Atrx/Hist1h2bm/Cenpp/Hist1h1b/Hist1h3i/Oip5	27
BP	GO:0042326	negative regulation of phosphorylation	83/2387	461/21092	1.19658e-05	0.000482619	0.000381293	Dab2/Stap1/Pard3/Ptpn6/Slfn1/Slfn1/Slfn1/Slfn1/Atf3/Igfbp3/Spred2/Fkbp8/Casp3/Plk1/Prkcd/Ccnb1/Stk38/Mvp/Cdkn2c/Bdkrb2/Prnp/Dtnbp1/Foxm1/Ppp2ca/Nck1/Arrb1/Cdkn1a/Hyal2/Insr/Flcn/Ptpn1/Pik3ip1/Cyld/Timp3/Rassf2/Cav3/Sh3bp5/Strap/Ptprc/Prdm15/Cib1/Wnk1/Ncor1/Terf2ip/Ajuba/Psen2/Qars/Fgfr1op/Hnrnpu/Hnrnpu/Ager/Psen1/Pmepa1/Dab2ip/Trib3/Trib1/Pibf1/Errfi1/Gbp4/Zmynd11/Sirt3/Inpp5f/Inpp5j/Actb/Ddit4/P…	83
BP	GO:0043393	regulation of protein binding	50/2387	239/21092	1.21145e-05	0.000483028	0.000381616	Dab2/Camk1/Spon1/Spag9/Nmd3/Aplp2/Plk1/Pkd1/Mef2c/Hopx/Traf4/Dtnbp1/Agrn/Csnk1e/Lrpap1/Ppp2ca/Epb41/Crbn/Arrb1/Map1lc3b/Cyld/Map2/Aurka/Fam192a/Aes/Dnajb2/Snapin/Ddx11/Ticam1/Hoxa3/Gpsm1/Psen2/Psen1/Dab2ip/Dysf/Epha4/Trib3/Rgma/Mark2/Cdon/Sppl3/Atr/Actb/Tiam1/Add1/Bdnf/Aurkb/Abl1/Men1/Men1	50
BP	GO:0030099	myeloid cell differentiation	73/2387	392/21092	1.21388e-05	0.000483028	0.000381616	Dab2/Stap1/Wdr61/Ptpn6/Chuk/Gnas/Stat1/Casp3/Notch2/Csf1/Gata3/Hist1h4f/Mef2c/Cd300lf/Jak3/Myb/Pparg/Sfxn1/Nckap1l/Flvcr1/Spib/Ets1/Fbn1/Dnase2a/Nme2/Tnfrsf11a/Rassf2/Pilrb1/Traf6/Klf2/Ncapg2/Fgfr3/Klf10/Eif6/Meis2/Runx1/Hbb-b1/Tet2/Cib1/Ncor1/Fas/Dll1/Psen2/Gpr171/Epas1/Psen1/Hist1h4b/Trib1/Tfe3/Zbtb16/Mapk14/Nrros/Nfatc1/Pml/Meis1/Senp1/Hba-a1/Prmt1/Add1/Atpif1/Il34/Cd74/Esrra/Irf4/Bcl6/Myh9/He…	73
BP	GO:0046578	regulation of Ras protein signal transduction	47/2387	220/21092	1.23086e-05	0.000486516	0.000384373	Ect2/Mcf2l/Notch2/Git1/Arpp19/Csf1/Spata13/F2rl3/Madd/Kras/Itga3/Foxm1/Akap13/Mapkap1/Itsn1/Dlc1/Arrb1/Cyth2/Dgkz/Col3a1/Flcn/Arhgef1/P2ry10/Plce1/Trio/Plekhg2/Ralgps1/Adra1b/Fgd2/Arhgef28/Dab2ip/Fgd1/Cyth4/Arhgap24/Arhgef25/Arhgap42/Tiam1/Map4k4/Trim67/Arhgef6/Eps8l2/Abl1/Bcl6/P2ry10b/Camk2d/Pdgfrb/F2rl2	47
BP	GO:0030890	positive regulation of B cell proliferation	16/2387	44/21092	1.28026e-05	0.000497509	0.000393058	Mef2c/Sash3/Nckap1l/Nfatc2/Clcf1/Clcf1/Tnfrsf13c/Cdkn1a/Ticam1/Cd81/Ptprc/Tnfrsf4/Tnfsf13b/Cd74/Tlr9/Bcl6	16
BP	GO:0050853	B cell receptor signaling pathway	16/2387	44/21092	1.28026e-05	0.000497509	0.000393058	Stap1/Ptpn6/Lck/Mef2c/Plekha1/Prkcb/Nckap1l/Nfatc2/Cd19/Ptprc/Prkch/Syk/Abl1/Gcsam/Blk/Cd79a	16
BP	GO:0016569	covalent chromatin modification	79/2387	434/21092	1.28384e-05	0.000497509	0.000393058	Wdr61/Huwe1/Rlf/Kdm4a/Hells/Prdm5/Ing3/Tmem179b/Ube2n/Prkcd/Kdm5a/Brca1/Gata3/Mcrs1/Ccnb1/Kdm5d/Nsd2/Hopx/Myb/Prkcb/Mysm1/Nat8f7/Dnmt1/Arrb1/Ccna2/Phf19/Satb1/Flcn/Kdm5c/Paxbp1/Srebf1/Rnf20/Zfp451/Chd1/Cdk9/Tet2/Hdac11/Ncor1/Sirt7/Bcor/Pax5/Brca2/Brd8/Naa60/Jmjd1c/Jmjd1c/Haspin/Snw1/Hdac6/Elk4/Jade2/Usp21/Prmt8/Ppp1r1b/Pml/Ing4/Kdm2a/Atrx/Sin3a/Kdm4b/Dr1/Prmt1/Epc1/Hist1h1b/Ncoa1/Aurkb/Irf4/Men1/…	79
BP	GO:0042098	T cell proliferation	45/2387	208/21092	1.33362e-05	0.000513445	0.000405648	Cd44/Ptpn6/Slfn1/Slfn1/Slfn1/Slfn1/Casp3/Cd151/Zc3h12d/Arg2/Pnp/Sash3/Jak3/Btla/Prnp/Nckap1l/Rc3h2/Nck1/Tnfrsf13c/Satb1/Il20rb/Blm/H2-Ab1/Traf6/Ptprc/Tmem131l/Tnfrsf4/Ager/Tnfsf13b/Slamf1/Ccr2/Pde5a/Ccnd3/Slc4a1/Efnb1/Itgb2/Syk/Malt1/Coro1a/H2-Aa/Il12a/Abl1/Twsg1/H2-T23/Glmn	45
BP	GO:0050864	regulation of B cell activation	33/2387	135/21092	1.35869e-05	0.000519722	0.000410607	Ptpn6/Bank1/Casp3/Pnp/Mef2c/Prdm1/Nsd2/Sash3/Btla/Nckap1l/Nfatc2/Clcf1/Clcf1/Tnfrsf13c/Cdkn1a/Cyld/Flt3/Siglecg/Ticam1/Cd81/Ptprc/Fcgr2b/Ikzf3/Trp53bp1/Fas/Tnfrsf13b/Tnfrsf4/Tnfsf13b/Syk/Cd74/Il2rg/Tlr9/Bcl6	33
BP	GO:0051494	negative regulation of cytoskeleton organization	36/2387	153/21092	1.40419e-05	0.000533683	0.000421636	Nubp1/Arap1/Prkcd/Mdm1/Ppp1r9a/Tacstd2/Dlc1/Hdgfl3/Map2/Cav3/Tmod2/Shank1/Cib1/Ckap2/Twf2/Hdac6/Dysf/Tpm1/Kifc1/Gmfg/Ccnf/Gmfb/Capg/Inpp5j/Tmem67/Phldb2/Add1/Coro1a/Pfn1/Carmil1/Slit2/Cfl1/Mid1/Map1a/Pecam1/Camsap3	36
BP	GO:0090329	regulation of DNA-dependent DNA replication	17/2387	49/21092	1.42359e-05	0.000537611	0.00042474	Lig3/E2f8/Ticrr/Msh3/Timeless/Wiz/Blm/Rfc5/Chek2/Ino80/Brca2/Atrx/E2f7/Smc3/Cdt1/Fbxo5/Atg7	17
BP	GO:0042770	signal transduction in response to DNA damage	25/2387	90/21092	1.44007e-05	0.000540392	0.000426937	Cd44/Spred2/Plk1/Brca1/Babam2/Foxm1/Cdkn1a/Dtl/Gen1/Abraxas1/Chek2/Rbm38/Brca2/Ddx5/Mapk14/Pml/Ing4/Grb2/Atrx/Atr/Snai1/E2f7/Cd74/Abl1/Pidd1	25
BP	GO:0007050	cell cycle arrest	34/2387	142/21092	1.62428e-05	0.000605681	0.000478519	Slfn1/Slfn1/Slfn1/Slfn1/Mcph1/Notch2/Pkd1/Brca1/Pnpt1/Cdkn2c/Rassf1/Ccnd1/Foxm1/Ppm1g/Mtbp/Cdkn1a/Map3k20/Cdk9/Chek2/Wnt10b/Rbm38/Dab2ip/Cdk4/Ern1/Pml/Ing4/Prr11/Il12a/Men1/Men1/Cdkn2d/Pidd1/Ddias/Mdm4	34
BP	GO:0016570	histone modification	77/2387	423/21092	1.64179e-05	0.000608387	0.000480656	Wdr61/Huwe1/Rlf/Kdm4a/Prdm5/Ing3/Tmem179b/Ube2n/Prkcd/Kdm5a/Brca1/Gata3/Mcrs1/Ccnb1/Kdm5d/Nsd2/Hopx/Myb/Prkcb/Mysm1/Nat8f7/Dnmt1/Arrb1/Ccna2/Phf19/Satb1/Flcn/Kdm5c/Paxbp1/Srebf1/Rnf20/Zfp451/Cdk9/Tet2/Hdac11/Ncor1/Sirt7/Bcor/Pax5/Brca2/Brd8/Naa60/Jmjd1c/Jmjd1c/Haspin/Snw1/Hdac6/Elk4/Jade2/Usp21/Prmt8/Ppp1r1b/Pml/Ing4/Kdm2a/Atrx/Sin3a/Kdm4b/Dr1/Prmt1/Epc1/Hist1h1b/Ncoa1/Aurkb/Irf4/Men1/Men1/Bcl6/A…	77
BP	GO:0045619	regulation of lymphocyte differentiation	40/2387	180/21092	2.04669e-05	0.000753717	0.000595474	Pglyrp1/Cd44/Ptpn6/Lck/Gata3/Nfkbiz/Pnp/Ctla2a/Prdm1/Sash3/Jak3/Myb/Nckap1l/Rc3h2/Cyld/Flt3/Ptprc/Runx1/Ikzf3/Fas/Tmem131l/Fanca/Zbtb16/Ccr2/Fancd2/Cyp26b1/Mettl3/Syk/Malt1/H2-Aa/Il12a/Cd74/Il2rg/Zeb1/Abl1/Tlr9/Bcl6/Ap3b1/Rhoa/Fbxo7	40
BP	GO:1902105	regulation of leukocyte differentiation	57/2387	290/21092	2.17801e-05	0.000797126	0.00062977	Pglyrp1/Cd44/Ptpn6/Gnas/Lck/Notch2/Csf1/Gata3/Nfkbiz/Pnp/Ctla2a/Prdm1/Sash3/Jak3/Myb/Nckap1l/Rc3h2/Fbn1/Nme2/Cyld/Rassf2/Pilrb1/Traf6/Flt3/Fgfr3/Klf10/Ptprc/Runx1/Ikzf3/Fas/Tmem131l/Fanca/Ager/Trib1/Tfe3/Zbtb16/Ccr2/Fancd2/Cyp26b1/Mettl3/Syk/Malt1/Il34/H2-Aa/Tmem176a/Il12a/Cd74/Esrra/Il2rg/Zeb1/Abl1/Tlr9/Bcl6/Ap3b1/Rhoa/Fbxo7/Thoc5	57
BP	GO:0001558	regulation of cell growth	79/2387	441/21092	2.30844e-05	0.000839678	0.000663388	Cd44/Dab2/Ptk2/Pttg1/Smurf1/Nme6/Pak1/Igfbp3/Sema3a/Fhl1/Eif4g2/Nubp1/Ulk2/Osgin1/Zc3h12d/Agt/Col14a1/Fn1/Cdkn2c/Usp47/Fdps/Pparg/Bcl11a/Gsk3a/Fam107a/Cth/Cdkn1a/Smarca2/Hyal2/Nppa/Trip10/Flcn/Nanos1/Map2/Cav3/Wnt11/Dnajb2/Spg20/Cd81/Cib1/Ulk1/Ino80/Fgfr1op/Htra1/Egfr/Twf2/Dab2ip/Brat1/Rgma/Rufy3/Pml/Epb41l3/Hyal1/Rbbp7/Csf2rb/Ifrd1/4932438A13Rik/Socs2/Ccr5/Syt17/Bdnf/Htra3/Atad3a/Rgs2/Wisp1/Slit…	79
BP	GO:0044774	mitotic DNA integrity checkpoint	20/2387	66/21092	2.55559e-05	0.000923909	0.000729935	Rfwd3/Ticrr/Top2a/Syf2/Ccnd1/Cdkn1a/Dgkz/Blm/Chek2/Rbm38/Orc1/Pml/Fbxo31/Cdk1/Mus81/Pidd1/Cdc6/Nek11/Rad17/Eme1	20
BP	GO:1903050	regulation of proteolysis involved in cellular protein catabolic process	43/2387	201/21092	2.73122e-05	0.000981417	0.000775369	Dab2/Ptk2/Clec16a/Smurf1/Chfr/Rchy1/Arih1/Plk1/Pkd1/Ubqln4/Rhbdf1/Gsk3a/Csnk1e/Il33/Aurka/Usp14/Fam192a/Csnk1a1/Dnajb2/Psme1/Wnt10b/Psen2/Psen1/Dab2ip/Psmd14/Epha4/Trib3/Trib1/Sumo3/Pml/Senp1/Usp13/Tmem67/Atpif1/Rnf144b/Trim67/Tlk2/Commd1/Glmn/Gba/Cbfa2t3/Map1a/Atg7	43
BP	GO:0051053	negative regulation of DNA metabolic process	35/2387	152/21092	2.99324e-05	0.00106909	0.000844638	Lig3/Terf1/Aunip/Hnrnpc/Gata3/Mcrs1/Msh3/Timeless/Pparg/Parpbp/Hist1h1a/Flcn/Blm/Chek2/Terf2ip/Trp53bp1/Brca2/Hnrnpu/Hnrnpu/Parp3/Pml/Ankle1/Polq/Tinf2/Atr/Rmi2/Hist1h1b/Men1/Men1/Bcl6/Pds5a/Smc3/Rad17/Fbxo5/Atg7	35
BP	GO:0090224	regulation of spindle organization	15/2387	42/21092	3.04992e-05	0.00108281	0.000855477	Dctn1/Plk1/Pkd1/Senp6/Chmp4b/Spag5/Gpsm2/Tacc3/Hnrnpu/Hnrnpu/Parp3/Tpx2/Rae1/Psrc1/Smc3	15
BP	GO:0002695	negative regulation of leukocyte activation	39/2387	177/21092	3.16234e-05	0.00111604	0.00088173	Pglyrp1/Cd44/Ptpn6/Slfn1/Slfn1/Slfn1/Slfn1/Bank1/Casp3/Zc3h12d/Arg2/Cd300lf/Prdm1/Jak3/Btla/Prnp/Rc3h2/Il20rb/Cyld/Cnr2/H2-Ab1/Sox11/Flt3/Runx1/Fcgr2b/Fas/Tmem131l/Tnfrsf13b/Pibf1/Ccr2/Pde5a/Ldlr/H2-Aa/Cd37/Cd74/Twsg1/Bcl6/Fbxo7/Glmn	39
BP	GO:0030308	negative regulation of cell growth	42/2387	196/21092	3.23065e-05	0.0011334	0.000895447	Dab2/Nme6/Pak1/Sema3a/Fhl1/Ulk2/Osgin1/Zc3h12d/Agt/Cdkn2c/Pparg/Bcl11a/Gsk3a/Cth/Cdkn1a/Smarca2/Hyal2/Nppa/Flcn/Map2/Cav3/Wnt11/Dnajb2/Spg20/Ulk1/Dab2ip/Rgma/Pml/Hyal1/Rbbp7/Ifrd1/Ccr5/Rgs2/Slit2/Cfl1/Bcl6/Cdkn2d/Nf2/Psrc1/Sema4d/Sema3f/Sema6a	42
BP	GO:0032984	protein-containing complex disassembly	44/2387	209/21092	3.34488e-05	0.00116658	0.000921654	Smarcd2/Nsf/Clec16a/Dhx8/Kif2c/Ubqln4/Sh3bp1/Kif18a/Insr/Map1lc3b/Hdgfl3/Kif24/Arid1a/Map2/Tmod2/Snapin/Nckap5/Eif5a/Akap5/Cib1/Vps16/Ckap2/Irgm1/Irgm1/Irgm1/Twf2/Hdac6/Dysf/Tpm1/Kif18b/Ogfod1/2810006K23Rik/Capg/Sh3gl2/Lamp2/Cln3/Ddit4/Add1/Carmil1/Cfl1/Mid1/Gba/Map1a/Camsap3	44
BP	GO:0043254	regulation of protein complex assembly	79/2387	446/21092	3.45886e-05	0.00119427	0.000943534	Eln/Fblim1/Rhobtb1/Atxn2/Eif4ebp1/Pak1/Bbs10/Terf1/Dctn1/Nr1h2/Prkcd/Senp6/Baiap2/Stxbp6/Ppp1r9a/Nckap1l/A730008H23Rik/Nck1/Crbn/Pan3/Map2/Cav3/Tmod2/Prkaa1/Zfp451/Psmc2/Plekhg2/Vdac2/Wnt10b/Vps16/Bik/Actr3b/Ajuba/Jchain/Ulk1/Fas/Usp50/Psen2/Clip1/Pmepa1/Twf2/Hdac6/Dab2ip/Rac1/Tpm1/Gmfg/Alox15/Gmfb/Rictor/Capg/Palld/Insig1/Sar1a/Gbp5/Lamp2/Inpp5j/Ankra2/Grb2/Dr1/Pde4dip/Atr/Rab3gap1/Add1/Coro1a/P…	79
BP	GO:0002244	hematopoietic progenitor cell differentiation	35/2387	153/21092	3.46457e-05	0.00119427	0.000943534	Apobec3/Ptpn6/Fst/Anln/Gata3/Kcp/Top2a/Prrc2c/Esco2/Hyal2/Flcn/Ssbp3/Nudt21/Flt3/Siglecg/Ston2/Ptprc/Runx1/Pld4/Pld4/Dock7/Tet2/Eml1/Tmem143/Psen2/Herc6/Tnfrsf13b/Psen1/Jam3/Ankle1/Armc6/Sin3a/Dact2/Kdr/Eef2	35
BP	GO:2001252	positive regulation of chromosome organization	39/2387	178/21092	3.61401e-05	0.00123851	0.000978484	Wdr61/Terf1/Ube2n/Brca1/Gata3/Fen1/Ccnb1/Smc5/Myb/Dnmt1/Gnl3/Arrb1/Phf19/Paxbp1/Srebf1/Rnf20/Ddx11/Cdk9/Ncor1/Anapc5/Hnrnpu/Hnrnpu/Snw1/Cct2/Pml/Kdm2a/Atrx/Sin3a/Atr/Hist1h1b/Aurkb/Tcp1/Men1/Men1/Bcl6/Sirt6/BC004004/Cenpe/Cdt1	39
BP	GO:0051258	protein polymerization	54/2387	275/21092	3.63468e-05	0.00123851	0.000978484	Eln/Rhobtb1/Pak1/Ube2c/Terf1/Dctn1/Prkcd/Baiap2/Cetn3/Ppp1r9a/Nckap1l/Nck1/Fam107a/Diaph3/Hdgfl3/Map2/Cav3/Cep192/Tmod2/Ttc17/Plekhg2/Vdac2/Actr3b/Washc3/Clip1/Twf2/Rac1/Tpm1/Gmfg/Alox15/Gmfb/Rictor/Capg/Efcab11/Inpp5j/Grb2/Pde4dip/Add1/Coro1a/Pfn1/Nde1/Carmil1/Slit2/Abl1/Cfl1/Rhoa/Cdc42ep4/Psrc1/Cenpj/Nin/Icam1/Pecam1/Fbxo5/Camsap3	54
BP	GO:2001020	regulation of response to DNA damage stimulus	43/2387	204/21092	3.9619e-05	0.00134229	0.00106048	Cd44/Dhx9/Rfwd3/Rad51/Tex15/Spred2/Aunip/Ube2n/Prkcd/Brca1/Pnp/Nsd2/Timeless/Usp47/Parpbp/Rad51ap1/Babam2/Foxm1/Blm/Mms19/Ddx11/Abraxas1/Cdk9/Chek2/Terf2ip/Trp53bp1/Ddx5/Egfr/Pml/Ankle1/Smg1/Polq/Atr/Snai1/Rmi2/Cd74/Abl1/Sirt6/Cdkn2d/Thoc5/Fign/Fbxo5/Ddias	43
BP	GO:0003300	cardiac muscle hypertrophy	26/2387	101/21092	4.19063e-05	0.00141172	0.00111533	Ptk2/Pak1/Kdm4a/Mef2a/Agt/Col14a1/Mef2c/Fdps/Gsk3a/Akap13/Nppa/Trip10/Cav3/Camta2/Sorbs2/Cdk9/Adra1b/Pde5a/Errfi1/Inpp5f/Tiam1/Klf15/Rgs2/Wisp1/Ezh2/Camk2d	26
BP	GO:0051988	regulation of attachment of spindle microtubules to kinetochore	8/2387	14/21092	4.25118e-05	0.00142402	0.00112505	Ect2/Racgap1/Ccnb1/Spag5/Hnrnpu/Hnrnpu/Knstrn/Cenpe	8
BP	GO:0043087	regulation of GTPase activity	57/2387	297/21092	4.41443e-05	0.0014704	0.00116169	Tbc1d30/Ect2/Tbc1d20/F11r/Ttc8/Gnas/Arap1/Eif5/Chn2/Sh3bp1/Cav2/Ccl6/Ephb3/Klrk1/Rap1gds1/Gapvd1/Agrn/Plxnc1/Pkp4/Arrb1/Tbc1d10b/Rabgap1/Rgs10/Wnt11/Tbck/Ccl8/Dock10/Dock7/Wnk1/Ajuba/Gpsm1/Afdn/Dab2ip/Fgd1/Epha4/Rgma/Arhgap24/Rictor/Tbc1d10a/Arhgap42/Sipa1l1/Tbc1d17/Ccl4/Tiam1/Rab3gap1/Rgl3/Map4k4/Dock11/Bcl6/Dvl2/Sec13/Rapgef3/Sema4d/Rapgef6/Ezh2/Icam1/Pecam1	57
BP	GO:1903037	regulation of leukocyte cell-cell adhesion	55/2387	284/21092	4.60795e-05	0.00152629	0.00120585	Cd44/Icos/Ptpn6/Slfn1/Slfn1/Slfn1/Slfn1/Lck/Casp3/Zc3h12d/Arg2/Gata3/Nfkbiz/Pnp/Sash3/Jak3/Myb/Btla/Prnp/Nckap1l/Rc3h2/Nck1/Tnfrsf13c/Ets1/Il20rb/Cyld/Blm/H2-Ab1/Traf6/Ptprc/Runx1/Wnk1/Tmem131l/Ager/Tnfsf13b/Zbtb16/Slamf1/Ccr2/Pde5a/Slc4a1/Efnb1/Syk/Malt1/Coro1a/H2-Aa/Il12a/Cd74/Il2rg/Twsg1/Bcl6/H2-T23/Ap3b1/Rhoa/Glmn/Icam1	55
BP	GO:0031098	stress-activated protein kinase signaling cascade	56/2387	291/21092	4.74244e-05	0.00156211	0.00123414	Dab2/Ptk2/Pak1/Spag9/Map4k1/Agt/Traf4/Dtnbp1/Map3k5/Pak6/Prdx1/Foxm1/Eda2r/Map3k20/Ptpn1/Cyld/Tnfrsf11a/Tlr3/Rassf2/Cav3/Vangl2/Traf6/Fgfr3/Lmnb1/Fcgr2b/Ncor1/Hacd3/Fas/Qars/Egfr/Ager/Fgd2/Dab2ip/Epha4/Trib1/Mapk14/Slamf1/Ern1/Errfi1/Zmynd11/Prmt1/Syk/Tiam1/Map4k4/Mlkl/Map3k14/Men1/Men1/Tlr9/Dvl2/Map2k6/Rhoa/Mid1/Plcb1/Map3k10/Zfp36	56
BP	GO:0031032	actomyosin structure organization	41/2387	193/21092	4.91257e-05	0.00160425	0.00126744	Kif23/Ect2/Eln/F11r/Cdc42bpb/Actg1/Pak1/Ttc8/Mef2a/Arap1/Racgap1/Anln/Mef2c/Ppp1r9a/Epb41l1/Akap13/Epb41/Tacstd2/Dlc1/Arrb1/Alms1/Cav3/Tmod2/Wnt11/Pxn/Ldb3/Cdc42bpa/Rac1/Tpm1/Epb41l3/Phldb2/Synpo/Pfn1/Carmil1/Abl1/Rapgef3/Rhoa/Myh9/Nf2/Zyx/Pdgfrb	41
BP	GO:0051403	stress-activated MAPK cascade	51/2387	258/21092	4.92449e-05	0.00160425	0.00126744	Dab2/Ptk2/Pak1/Spag9/Map4k1/Agt/Traf4/Dtnbp1/Map3k5/Prdx1/Foxm1/Eda2r/Map3k20/Ptpn1/Cyld/Tnfrsf11a/Tlr3/Rassf2/Cav3/Vangl2/Traf6/Fgfr3/Lmnb1/Fcgr2b/Ncor1/Hacd3/Fas/Qars/Egfr/Ager/Fgd2/Dab2ip/Epha4/Trib1/Mapk14/Slamf1/Ern1/Zmynd11/Prmt1/Syk/Tiam1/Map4k4/Mlkl/Men1/Men1/Tlr9/Dvl2/Mid1/Plcb1/Map3k10/Zfp36	51
BP	GO:0018105	peptidyl-serine phosphorylation	58/2387	305/21092	4.98344e-05	0.00161458	0.0012756	Cd44/Camk1/Chuk/Pak1/Plk1/Pkd1/Morc3/Map4k1/Prkcd/Agt/Ccnb1/Stk38/Bdkrb2/Prkcb/Gsk3a/Csnk1e/Nck1/Mapkap1/Arrb1/Nrxn1/Clk1/Rassf2/Csnk1a1/Prkaa1/Dock7/Sgk3/Chek2/Wnk1/Terf2ip/Ulk1/Prkch/Ikbke/Egfr/Hdac6/Mapk14/Ppp1r1b/Mark2/Ikbkb/Ern1/Rictor/Mastl/Pdk2/Inpp5f/Smg1/Inpp5j/Mknk2/Atr/Syk/Ddit4/Bdnf/Aurkb/Cdk1/Tlk2/Ttk/Rapgef3/Camk2d/Map3k10/Vrk3	58
BP	GO:0051291	protein heterooligomerization	37/2387	168/21092	5.03166e-05	0.00162134	0.00128094	Kcnh2/Farsb/Hist1h3a/Jup/Hist1h4f/Wiz/Agrn/Rrm2/Ppp2ca/Rrm1/Akap2/Nrxn1/Insr/Ikzf5/H2-Ke6/Cnga2/Nudt21/Ywhab/Prkaa1/Hbb-b1/Hist2h3b/Nup54/Sqstm1/Hist1h4b/Hist1h3h/Uqcrh/Hist2h3c2/Hist2h3c1/Hist1h3g/Grb2/Hba-a1/Pdss2/Cpsf6/Cd74/Hist1h3i/Tmem120a/Rcc1	37
BP	GO:1901652	response to peptide	66/2387	360/21092	5.11521e-05	0.00163936	0.00129518	Ptk2/Pkm/Eif4ebp1/Pak1/Nfkb1/Cacnb1/Serpina3i/Stat1/Pdk4/Nr4a2/Prkcd/Gatm/Gatm/Cav2/Timeless/Nlrp1a/Nlrp1a/Nlrp1a/Nlrp1a/Prkcb/Mbd5/Prnp/Pparg/Gsk3a/Nck1/Insr/Pla2g1b/Myo5a/Ptpn1/Grb14/Lpin3/Srebf1/Pxn/Ddx11/Serpina3c/Ptpra/Eif6/Khk/Fcgr2b/Gck/Lpin2/Rhoq/Ager/Psen1/Epha4/Trib3/Mapk14/Cdk4/Ccnd3/Uchl3/Pdk2/Grb2/Ywhag/Stxbp4/Hadha/Socs2/Klf15/Sort1/Slc27a1/Slc26a6/Slc26a6/Esrra/Srsf5/Cfl1/Plcd1/Plc…	66
BP	GO:0031297	replication fork processing	12/2387	30/21092	5.22519e-05	0.00166288	0.00131376	Rfwd3/Rad51/Cenpx/Blm/Gen1/Dna2/Ddx11/Cdk9/Brca2/Tonsl/Atrx/Eme1	12
BP	GO:0001776	leukocyte homeostasis	27/2387	108/21092	5.24472e-05	0.00166288	0.00131376	Cd44/Casp3/Mthfd1/Mef2c/Jak3/Tsc22d3/Nckap1l/Rc3h2/Tnfrsf13c/Flt3/Dock10/Ccnb2/Fcgr2b/Fas/Tnfrsf13b/Tnfrsf4/Tnfsf13b/Jam3/Ikbkb/Ccr2/Coro1a/Slc40a1/Dock11/Cd74/Abl1/Men1/Men1	27
BP	GO:1904951	positive regulation of establishment of protein localization	79/2387	453/21092	5.97215e-05	0.00188345	0.00148802	Lpl/Ect2/Dhx9/Cnst/Camk1/Golph3/Chuk/Pak1/Glul/Nr1h2/Prkcd/Agt/Jup/Brca1/Gata3/Kif3a/Ipo5/Flna/Ncl/Pfkfb2/Tm9sf4/Nlrp1a/Nlrp1a/Nlrp1a/Nlrp1a/Clec9a/Prnp/Exoc1/Ang/Gsk3a/Arrb1/Hyal2/Zfp384/Stom/Il33/Cacna1d/Cacnb3/Flt3/Prkaa1/Doc2b/Gck/Akap5/Cib1/Tnfsf15/Oxct1/Myrip/Usp50/Ptp4a3/Mmp13/Tnfrsf4/Ano1/Egfr/Ffar2/Psen1/Cct2/Mapk14/Postn/Slamf1/Rufy3/Sar1a/Sirt3/Tlr8/Syk/Ccr5/Cdk1/Tcp1/Baiap3/Commd1/Abl…	79
BP	GO:0032970	regulation of actin filament-based process	69/2387	383/21092	6.16148e-05	0.00193288	0.00152707	Stap1/Pard3/Ect2/Eln/Celsr1/Rhobtb1/F11r/Pak1/Ttc8/Arap1/Prkcd/Jup/Baiap2/Mef2c/Flna/Sh3bp1/Ppp1r9a/Cit/Nckap1l/Ssh3/Akap13/Nck1/Tacstd2/Fam107a/Fxyd1/Dlc1/Stau2/Alms1/Cav3/Vangl2/Tmod2/Wnt11/Scn5a/Pxn/Plekhg2/Shank1/Actr3b/Jam3/Kcne3/Twf2/Rac1/Tpm1/Ctsl/Gmfg/Alox15/Gmfb/Rictor/Capg/Grb2/Phldb2/Add1/Cacna1c/Synpo/Coro1a/Myo1f/Pfn1/Carmil1/Slit2/Abl1/Cfl1/Rapgef3/Rhoa/Myh9/Nf2/Cdc42ep4/Atp1a1/Icam…	69
BP	GO:0042100	B cell proliferation	27/2387	109/21092	6.22929e-05	0.00194387	0.00153575	Cd180/Casp3/Prkcd/Mef2c/Prdm1/Sash3/Btla/Nckap1l/Nfatc2/Clcf1/Clcf1/Tnfrsf13c/Cdkn1a/Siglecg/Ticam1/Cd81/Ptprc/Fcgr2b/Ikzf3/Tnfrsf13b/Tnfrsf4/Tnfsf13b/Cd74/Abl1/Tlr9/Bcl6/Cd79a	27
BP	GO:0018205	peptidyl-lysine modification	62/2387	335/21092	6.41336e-05	0.00199083	0.00157285	Wdr61/Vipas39/Rlf/Kdm4a/Prdm5/Ing3/Tmem179b/Senp6/Brca1/Gata3/Mcrs1/Nsd2/Myb/Dohh/Nat8f7/Bcl11a/Dnmt1/Gnl3/Arrb1/Cth/Phf19/Flcn/Tollip/Por/Prkaa1/Zfp451/Tet2/Vcpkmt/Plod3/Nfe2/Bcor/Pax5/Brca2/Brd8/Naa60/Snw1/Hdac6/Jade2/Sumo3/Senp1/Ing4/Sirt3/Atrx/Sin3a/Kdm4b/Lox/Etfbkmt/Dr1/Eef2kmt/Epc1/Plod2/Hist1h1b/Ncoa1/Lipt1/Klf15/Glrx5/Uspl1/Irf4/Actl6a/Ezh2/Ehmt2/Atg7	62
BP	GO:0031497	chromatin assembly	29/2387	121/21092	6.47991e-05	0.00200101	0.0015809	Hells/Hist1h3a/Hist1h4f/Asf1b/Shprh/A730008H23Rik/Hist1h1a/Smarca2/Hist1h2bb/Cenpa/Brd2/Cabin1/Hist1h3c/Hist2h3b/Hist1h2bk/Naa60/Hist1h4b/Hist1h3h/Hist2h3c2/Hist2h3c1/Hist2h2bb/Hist1h3g/Atrx/Hist1h2bm/Cenpp/Hist1h1b/Sirt6/Hist1h3i/Oip5	29
BP	GO:0051656	establishment of organelle localization	82/2387	476/21092	6.74782e-05	0.00207294	0.00163773	Kif23/Prepl/Ptk2/Tmem230/Spdl1/Mcph1/Nusap1/Nmd3/Kif2c/Terf1/Dctn1/Git1/Map4/Chmp4b/Ccnb1/Spag5/Madd/Prkcb/Klhl12/Dtnbp1/Kif18a/Stx3/Fam83d/Ncs1/Spast/Nppa/Myo5a/Map2/Cenpa/A830010M20Rik/Gpsm2/Snapin/Cadps2/Doc2b/Eif6/Kif1a/Dock7/Snap23/Tacc3/Cenpq/Nr3c2/Myrip/Brca2/Hnrnpu/Hnrnpu/Cenpc1/Ndc80/Psen1/Cdc42bpa/Pibf1/Kifc1/Hook3/Cenpf/Sar1a/Kif1b/Kif22/Sun2/Cln3/Syk/Syne2/Rab3gap1/Map6/Syt17/Birc5/St…	82
BP	GO:0014897	striated muscle hypertrophy	26/2387	104/21092	7.15874e-05	0.00217429	0.0017178	Ptk2/Pak1/Kdm4a/Mef2a/Agt/Col14a1/Mef2c/Fdps/Gsk3a/Akap13/Nppa/Trip10/Cav3/Camta2/Sorbs2/Cdk9/Adra1b/Pde5a/Errfi1/Inpp5f/Tiam1/Klf15/Rgs2/Wisp1/Ezh2/Camk2d	26
BP	GO:0000910	cytokinesis	34/2387	152/21092	7.18773e-05	0.00217429	0.0017178	Kif23/Ect2/Prc1/Sept10/Nusap1/Plk1/Racgap1/Git1/E2f8/Anln/Chmp4b/Cit/Cxcr5/Kif4/Pkp4/Spast/Flcn/Aurka/Cenpa/Spg20/Brca2/Ckap2/Sept8/E2f7/Birc5/Sept3/Aurkb/Cfl1/Rhoa/Myh9/Cdc6/Kif20b/Pik3r4/Cdt1	34
BP	GO:0051250	negative regulation of lymphocyte activation	34/2387	152/21092	7.18773e-05	0.00217429	0.0017178	Pglyrp1/Cd44/Ptpn6/Slfn1/Slfn1/Slfn1/Slfn1/Bank1/Casp3/Zc3h12d/Arg2/Prdm1/Jak3/Btla/Prnp/Rc3h2/Il20rb/Cyld/H2-Ab1/Sox11/Flt3/Runx1/Fcgr2b/Fas/Tmem131l/Tnfrsf13b/Pibf1/Pde5a/H2-Aa/Cd74/Twsg1/Bcl6/Fbxo7/Glmn	34
BP	GO:0019884	antigen processing and presentation of exogenous antigen	12/2387	31/21092	7.65049e-05	0.00230253	0.00181911	Cd1d2/H2-DMb1/H2-Ab1/Ctse/Psme1/Tap2/Traf6/Fcgr2b/H2-Aa/Cd74/Ap3b1/Fcgr3	12
BP	GO:0007062	sister chromatid cohesion	17/2387	55/21092	7.69785e-05	0.00230508	0.00182113	Pttg1/Bub1b/Fen1/Smc5/Esco2/Ddx11/Bub1/Haspin/Kif22/Atrx/Cdc20/Mcmbp/Sgo1/Pds5a/Cdca5/Smc3/Hdac8	17
BP	GO:0010332	response to gamma radiation	16/2387	50/21092	7.80479e-05	0.00232536	0.00183715	Pnp/Cdkn1a/Tmem109/Map3k20/Prkaa1/Ptprc/Gtf2h5/Chek2/Brca2/Fancd2/Pml/Atr/Tlk2/Men1/Men1/Ddias	16
BP	GO:0048638	regulation of developmental growth	70/2387	393/21092	7.88926e-05	0.00233877	0.00184775	Npy1r/Ptk2/Atxn2/Smurf1/Pak1/Gnas/Sema3a/Eif4g2/Ulk2/Agt/Col14a1/Csf1/Fn1/Mef2c/Spr/Ccnb1/Ybx3/Sash3/Hopx/Fdps/Mbd5/Agrn/Bcl11a/Gsk3a/Flvcr1/Tbx5/Insr/Azgp1/Alms1/Trip10/Plac8/Map2/Cav3/Por/Spg20/Flt3/Fgfr3/Ncor1/Ulk1/Dll1/Gpat4/Ppib/Twf2/Mapk14/Htra2/Rgma/Cdk4/Rufy3/Meis1/Ifrd1/Socs2/Cacna1c/Ccr5/Wnt2/Syt17/Bdnf/Cdk1/Rgs2/Wisp1/Slit2/Wdr36/Abl1/Men1/Men1/Cfl1/Plcb1/Sema4d/Plaa/Sema3f/Sema6a	70
BP	GO:0050866	negative regulation of cell activation	41/2387	197/21092	7.98797e-05	0.00235625	0.00186156	Pglyrp1/Cd44/Ptpn6/Slfn1/Slfn1/Slfn1/Slfn1/Bank1/Casp3/Zc3h12d/Prkcd/Arg2/Cd300lf/Prdm1/Jak3/Btla/Prnp/Rc3h2/Il20rb/Cyld/Cnr2/H2-Ab1/Sox11/Flt3/Runx1/Fcgr2b/Fas/Tmem131l/Tnfrsf13b/Cd9/Pibf1/Ccr2/Pde5a/Ldlr/H2-Aa/Cd37/Cd74/Twsg1/Bcl6/Fbxo7/Glmn	41
BP	GO:0046631	alpha-beta T cell activation	34/2387	153/21092	8.25149e-05	0.00242194	0.00191345	Cd44/Arg2/Gata3/Nfkbiz/Pnp/Prdm1/Sash3/Jak3/Myb/Btla/Nckap1l/Rc3h2/Satb1/Blm/H2-Ab1/Ptprc/Runx1/Ncor1/Rpl22/Ager/Zbtb16/Il18r1/Ccr2/Syk/Malt1/Il12a/Il2rg/Abl1/Irf4/Twsg1/Bcl6/H2-T23/Ap3b1/Rhoa	34
BP	GO:0031345	negative regulation of cell projection organization	42/2387	204/21092	8.51712e-05	0.00248759	0.00196532	Dab2/Tbc1d30/Stap1/Ptk2/Sema3a/Ulk2/Map4/Prkcd/Flna/Cit/Prnp/Dtnbp1/Itga3/Bcl11a/Gsk3a/Tacstd2/Cyth2/Nrxn1/Map2/Snapin/Spg20/Cib1/Klk8/Ulk1/Psen1/Odf2l/Epha4/Rgma/Arhgap24/Rufy3/Inpp5f/Inpp5j/Ifrd1/Map4k4/Ccr5/Dnm3/Slit2/Cfl1/Rhoa/Sema4d/Sema3f/Sema6a	42
BP	GO:1903052	positive regulation of proteolysis involved in cellular protein catabolic process	27/2387	111/21092	8.71061e-05	0.00253163	0.00200011	Dab2/Ptk2/Smurf1/Chfr/Rchy1/Arih1/Plk1/Gsk3a/Csnk1e/Il33/Aurka/Csnk1a1/Dnajb2/Psen2/Psen1/Dab2ip/Trib3/Trib1/Sumo3/Usp13/Tmem67/Atpif1/Rnf144b/Trim67/Gba/Cbfa2t3/Atg7	27
BP	GO:0016050	vesicle organization	49/2387	251/21092	9.47157e-05	0.00273936	0.00216423	Tbc1d20/Dlg4/Lyst/Golph3/Snx11/Agfg1/Stxbp6/Cav2/Eea1/Klhl12/Stx5a/Dtnbp1/Rab14/Stx3/Hook1/Aqp11/Stx16/Sec24c/A830010M20Rik/Snapin/Doc2b/Snap23/Vps16/Washc4/Usp50/Sqstm1/Dysf/Hook3/Slamf1/Sdc1/Insig1/Sar1a/Tgfbrap1/Coro1a/Sort1/Dnm3/Stx8/Baiap3/Ap1s2/Sec13/Sec24a/Ap3b1/Lamtor1/Rab3a/Rab3a/Syt7/Rab27a/Ap2m1/Fbxo5	49
BP	GO:0018108	peptidyl-tyrosine phosphorylation	58/2387	312/21092	9.5786e-05	0.00275687	0.00217807	Cd44/Stap1/Ptk2/Ptpn6/Dlg4/Bank1/Cnot7/Lck/Aplp2/Srms/Clk4/Prkcd/Agt/Cav2/Mvp/Jak3/Prnp/Agrn/Clcf1/Clcf1/Hyal2/Insr/Clk1/Sla/Ptpn1/Pxn/Sh3bp5/Ctnnd1/Ctnnd1/Ncapg2/Cd81/Fgfr3/Ptprc/Psen2/Egfr/Psen1/Epha4/Pibf1/Rictor/Errfi1/Inpp5f/Vegfb/Cass4/Itgb2/Syk/Il12a/Cd74/Ttk/Abl1/Dvl2/Kdr/Nf2/Prmt2/Blk/Sema4d/Icam1/Pecam1/Pdgfrb	58
BP	GO:0045580	regulation of T cell differentiation	33/2387	148/21092	9.72506e-05	0.00277211	0.00219011	Cd44/Lck/Gata3/Nfkbiz/Pnp/Ctla2a/Prdm1/Sash3/Jak3/Myb/Nckap1l/Rc3h2/Cyld/Ptprc/Runx1/Tmem131l/Fanca/Zbtb16/Ccr2/Fancd2/Cyp26b1/Mettl3/Syk/Malt1/H2-Aa/Il12a/Cd74/Il2rg/Zeb1/Abl1/Bcl6/Ap3b1/Rhoa	33
BP	GO:2000058	regulation of ubiquitin-dependent protein catabolic process	33/2387	148/21092	9.72506e-05	0.00277211	0.00219011	Dab2/Ptk2/Clec16a/Smurf1/Chfr/Rchy1/Arih1/Plk1/Ubqln4/Gsk3a/Csnk1e/Il33/Aurka/Usp14/Csnk1a1/Dnajb2/Wnt10b/Psen2/Psen1/Trib3/Trib1/Sumo3/Pml/Senp1/Rnf144b/Trim67/Tlk2/Commd1/Glmn/Gba/Cbfa2t3/Map1a/Atg7	33
BP	GO:0060249	anatomical structure homeostasis	69/2387	389/21092	0.000100683	0.00282452	0.00223152	Ccne2/Ccne1/Gnas/Rad51/Tex15/Rpa1/Pdk4/Bbs10/Terf1/Dctn1/Col14a1/Csf1/Hnrnpc/Ctsh/Mcrs1/Chmp4b/Mdm1/Smc5/Sash3/Kras/Gnl3/Ildr2/Dclre1a/Il20rb/Nanos1/Blm/Tnfrsf11a/Cav3/Dna2/Traf6/Flt3/Strap/Prkaa1/Terf2ip/Smc6/Dram2/Nphp3/Psen2/Brca2/Hnrnpu/Hnrnpu/Egfr/Epas1/Parp3/Rac1/Cct2/Ccr2/Pml/Slc28a2/Smg1/Lamp2/Atrx/Tinf2/Atr/Fggy/Syk/Add1/Coro1a/Aurkb/Acp5/Tcp1/Wdr36/Tlr9/Haao/Sirt6/Kdr/Map1a/Hdac8/Pdgfrb	69
BP	GO:0014896	muscle hypertrophy	26/2387	106/21092	0.000100696	0.00282452	0.00223152	Ptk2/Pak1/Kdm4a/Mef2a/Agt/Col14a1/Mef2c/Fdps/Gsk3a/Akap13/Nppa/Trip10/Cav3/Camta2/Sorbs2/Cdk9/Adra1b/Pde5a/Errfi1/Inpp5f/Tiam1/Klf15/Rgs2/Wisp1/Ezh2/Camk2d	26
BP	GO:0006914	autophagy	67/2387	375/21092	0.000100995	0.00282452	0.00223152	Ptk2/Clec16a/Smurf1/Kdm4a/Eif4g2/Atg12/Ulk2/Ubqln4/Mid2/Qsox1/Chmp4b/Trim21/Trim12a/Gabarap/Atg2a/Atg2a/Gsk3a/Nprl3/Acbd5/Lrsam1/Map1lc3b/Flcn/Tollip/Srebf1/Snapin/Usp30/Prkaa1/Ticam1/Vps16/Nhlrc1/Dram2/Gpsm1/Ulk1/Sqstm1/Irgm1/Irgm1/Irgm1/Ager/Psen1/Gopc/Hdac6/Htra2/Rnf152/Usp13/Lamp2/Wdr81/Atg16l1/Tbc1d17/Cln3/Scfd1/Rab3gap1/Emc6/Atpif1/Zfyve1/Vmp1/Anxa7/Abl1/Tlr9/Arsb/Kdr/Fbxo7/Plaa/Gba/Pik3r4/…	67
BP	GO:0061919	process utilizing autophagic mechanism	67/2387	375/21092	0.000100995	0.00282452	0.00223152	Ptk2/Clec16a/Smurf1/Kdm4a/Eif4g2/Atg12/Ulk2/Ubqln4/Mid2/Qsox1/Chmp4b/Trim21/Trim12a/Gabarap/Atg2a/Atg2a/Gsk3a/Nprl3/Acbd5/Lrsam1/Map1lc3b/Flcn/Tollip/Srebf1/Snapin/Usp30/Prkaa1/Ticam1/Vps16/Nhlrc1/Dram2/Gpsm1/Ulk1/Sqstm1/Irgm1/Irgm1/Irgm1/Ager/Psen1/Gopc/Hdac6/Htra2/Rnf152/Usp13/Lamp2/Wdr81/Atg16l1/Tbc1d17/Cln3/Scfd1/Rab3gap1/Emc6/Atpif1/Zfyve1/Vmp1/Anxa7/Abl1/Tlr9/Arsb/Kdr/Fbxo7/Plaa/Gba/Pik3r4/…	67
BP	GO:0048640	negative regulation of developmental growth	29/2387	124/21092	0.000103513	0.00288135	0.00227641	Ptk2/Atxn2/Pak1/Gnas/Sema3a/Ulk2/Bcl11a/Gsk3a/Tbx5/Alms1/Plac8/Map2/Cav3/Spg20/Fgfr3/Ulk1/Rgma/Meis1/Ifrd1/Socs2/Ccr5/Rgs2/Slit2/Men1/Men1/Cfl1/Sema4d/Sema3f/Sema6a	29
BP	GO:0006909	phagocytosis	38/2387	180/21092	0.000104537	0.00289627	0.0022882	Stap1/Rhobtb1/Ptk2/Elmo3/Sh3bp1/Cd300lf/Tm9sf4/Pparg/Rab14/Nckap1l/Lman2/Ptx3/Pear1/Myo1g/Ptprc/Pld4/Pld4/Fcgr2b/Spon2/Pip5k1c/Mbl1/Ager/Rac1/Dysf/Alox15/Slamf1/Ccr2/Itgb2/Syk/Coro1a/Abl1/Myh9/Fcgr3/Syt7/Rab27a/Pecam1/Atg7/Arhgap25	38
BP	GO:0016236	macroautophagy	40/2387	193/21092	0.000106653	0.00294115	0.00232366	Clec16a/Smurf1/Atg12/Ulk2/Ubqln4/Qsox1/Chmp4b/Gabarap/Atg2a/Atg2a/Nprl3/Lrsam1/Map1lc3b/Snapin/Usp30/Vps16/Gpsm1/Ulk1/Sqstm1/Irgm1/Irgm1/Irgm1/Psen1/Hdac6/Htra2/Lamp2/Wdr81/Atg16l1/Cln3/Scfd1/Rab3gap1/Emc6/Zfyve1/Vmp1/Kdr/Plaa/Gba/Pik3r4/Ehmt2/Atg7	40
BP	GO:0046394	carboxylic acid biosynthetic process	62/2387	341/21092	0.000108528	0.00296285	0.0023408	Lpl/Aldh1a2/Pkm/Nfkb1/Got1/Glul/Pdk4/Zbtb20/Asl/Hpgds/Nr1h2/Agt/Pfkp/Mthfd1/Brca1/Gatm/Gatm/Scd1/Pfkfb2/Cth/Insr/Pla2g1b/Myo5a/H2-Ke6/Srebf1/Cyp1a1/Mthfd1l/Gls/Prkaa1/Eif6/Khk/Gck/Ncor1/Hacd3/Plod3/Ptgs1/Tbxas1/Dhfr/Srr/Mri1/Pex2/Trib3/Pibf1/Alox15/Hyal1/Insig1/Ccnd3/Ldhb/Syk/Ddit4/Plod2/Eno4/Apip/Cd74/Star/Haao/Sirt6/Kynu/Acot11/Kmo/Cbfa2t3/Lpgat1	62
BP	GO:0003012	muscle system process	68/2387	383/21092	0.000109375	0.00296285	0.0023408	Npy1r/Tifab/Kcnh2/Ptk2/Pak1/Kdm4a/Lck/Mef2a/Tbce/Uty/Agt/Jup/Col14a1/Arg2/Mef2c/Flna/Gatm/Gatm/Rap1gds1/Bdkrb2/Fdps/Agrn/Gsk3a/Akap13/Fxyd1/Nppa/Trip10/Ednra/Cav3/Camta2/Sorbs2/Gtf2i/Tmod2/Cacna1d/Scn5a/Atp1b1/Myl4/Sgcd/Cdk9/Ptgs1/Psen2/Tead1/Kcne3/Adra1b/Gtf2ird1/Tpm1/Nfatc1/Pde5a/Camk2g/Errfi1/Grcc10/Arhgap42/Inpp5f/Vegfb/Sulf1/Tiam1/Cacna1c/Klf15/Myh11/Rgs2/Wisp1/Map2k6/Gtf2ird2/Rhoa/Mrvi1/Atp…	68
BP	GO:0042129	regulation of T cell proliferation	37/2387	174/21092	0.000109439	0.00296285	0.0023408	Cd44/Ptpn6/Slfn1/Slfn1/Slfn1/Slfn1/Casp3/Zc3h12d/Arg2/Pnp/Sash3/Jak3/Btla/Prnp/Nckap1l/Nck1/Tnfrsf13c/Il20rb/Blm/H2-Ab1/Traf6/Ptprc/Tmem131l/Ager/Tnfsf13b/Slamf1/Ccr2/Pde5a/Slc4a1/Efnb1/Syk/Coro1a/H2-Aa/Il12a/Twsg1/H2-T23/Glmn	37
BP	GO:0140013	meiotic nuclear division	37/2387	174/21092	0.000109439	0.00296285	0.0023408	Ccne2/Pttg1/Bub1b/Ccne1/Rad51/Trip13/Tex15/Terf1/Plk1/Cenpx/Msh3/Mybl1/Top2a/Kif18a/Blm/Aurka/Smc2/Bub1/Brca2/Cenpc1/Fanca/Aspm/Fancd2/Marf1/Cyp26b1/Mastl/Ncaph2/Cdc20/Brip1/Mus81/Ttk/Cks2/Sgo1/Plcb1/Ehmt2/Fbxo5/Eme1	37
BP	GO:0043507	positive regulation of JUN kinase activity	21/2387	78/21092	0.000111477	0.00300431	0.00237356	Dab2/Pak1/Spag9/Map4k1/Map3k5/Map3k20/Ptpn1/Tnfrsf11a/Vangl2/Traf6/Ager/Fgd2/Dab2ip/Epha4/Ern1/Syk/Tiam1/Mlkl/Tlr9/Dvl2/Map3k10	21
BP	GO:1903362	regulation of cellular protein catabolic process	46/2387	233/21092	0.000115943	0.00311053	0.00245748	Dab2/Ptk2/Clec16a/Smurf1/Chfr/Rchy1/Arih1/Plk1/Pkd1/Ubqln4/Atraid/Rhbdf1/Gsk3a/Csnk1e/Il33/Aurka/Usp14/Fam192a/Csnk1a1/Dnajb2/Psme1/Cd81/Wnt10b/Psen2/Psen1/Dab2ip/Psmd14/Epha4/Trib3/Trib1/Sumo3/Pml/Senp1/Ldlr/Usp13/Tmem67/Atpif1/Rnf144b/Trim67/Tlk2/Commd1/Glmn/Gba/Cbfa2t3/Map1a/Atg7	46
BP	GO:0016053	organic acid biosynthetic process	62/2387	342/21092	0.000118205	0.00315693	0.00249413	Lpl/Aldh1a2/Pkm/Nfkb1/Got1/Glul/Pdk4/Zbtb20/Asl/Hpgds/Nr1h2/Agt/Pfkp/Mthfd1/Brca1/Gatm/Gatm/Scd1/Pfkfb2/Cth/Insr/Pla2g1b/Myo5a/H2-Ke6/Srebf1/Cyp1a1/Mthfd1l/Gls/Prkaa1/Eif6/Khk/Gck/Ncor1/Hacd3/Plod3/Ptgs1/Tbxas1/Dhfr/Srr/Mri1/Pex2/Trib3/Pibf1/Alox15/Hyal1/Insig1/Ccnd3/Ldhb/Syk/Ddit4/Plod2/Eno4/Apip/Cd74/Star/Haao/Sirt6/Kynu/Acot11/Kmo/Cbfa2t3/Lpgat1	62
BP	GO:0031110	regulation of microtubule polymerization or depolymerization	22/2387	84/21092	0.000120633	0.00320734	0.00253396	Pak1/Terf1/Dctn1/Ska3/Hdgfl3/Map2/Cav3/Cib1/Ckap2/Clip1/Hdac6/Rac1/Dysf/Inpp5j/Ska2/Pde4dip/Abl1/Psrc1/Mid1/Map1a/Nin/Camsap3	22
BP	GO:0001782	B cell homeostasis	13/2387	37/21092	0.000124458	0.00329425	0.00260262	Cd44/Casp3/Mef2c/Nckap1l/Rc3h2/Tnfrsf13c/Dock10/Tnfrsf13b/Tnfsf13b/Ikbkb/Dock11/Cd74/Abl1	13
BP	GO:0018212	peptidyl-tyrosine modification	58/2387	315/21092	0.000125369	0.00330362	0.00261003	Cd44/Stap1/Ptk2/Ptpn6/Dlg4/Bank1/Cnot7/Lck/Aplp2/Srms/Clk4/Prkcd/Agt/Cav2/Mvp/Jak3/Prnp/Agrn/Clcf1/Clcf1/Hyal2/Insr/Clk1/Sla/Ptpn1/Pxn/Sh3bp5/Ctnnd1/Ctnnd1/Ncapg2/Cd81/Fgfr3/Ptprc/Psen2/Egfr/Psen1/Epha4/Pibf1/Rictor/Errfi1/Inpp5f/Vegfb/Cass4/Itgb2/Syk/Il12a/Cd74/Ttk/Abl1/Dvl2/Kdr/Nf2/Prmt2/Blk/Sema4d/Icam1/Pecam1/Pdgfrb	58
BP	GO:0006898	receptor-mediated endocytosis	43/2387	214/21092	0.000126188	0.00331048	0.00261545	Dab2/Pard3/Nsf/Dlg4/Atxn2/Vldlr/Adm/Cap1/Kif3a/Cav2/Clec9a/Dtnbp1/Hist1h1a/Lrpap1/Arrb1/Lmbr1l/Ldlrad3/Cav3/Nedd4/Cd81/Fcgr2b/Akap5/Hip1/Ulk1/Dll1/Pip5k1c/Egfr/Cd9/Snx17/Atp5b/Inpp5f/Sh3gl2/Ldlr/Grb2/Folr2/Mtmr2/Cln3/Itgb2/Syk/Aak1/Ap2b1/Dnm3/Ap2m1	43
BP	GO:0009314	response to radiation	70/2387	399/21092	0.000127069	0.0033189	0.0026221	Ect2/Dynlrb1/Rfwd3/Rad51/Fbxl21/Casp3/Rad54l/Rad54b/Brca1/Gata3/Pnp/Ticrr/Usp47/Kras/Pparg/Rad51ap1/Babam2/Ccnd1/Pde8b/Arrb1/Cdkn1a/Tmem109/Hyal2/Map3k20/Usp28/Col3a1/Mfap4/Dtl/Blm/Trove2/Gen1/Mme/Abraxas1/Prkaa1/Ptprc/Meis2/Gtf2h5/Chek2/Crip1/Ino80/Ric8a/Brca2/Pclaf/Egfr/Lrrn4/Adra1b/Mapk14/Brat1/Ppp1r1b/Fancd2/Pml/Polk/Hyal1/Mettl3/Grb2/Atr/Cacna1c/Fbxl3/Synpo/Aurkb/Il12a/Tlk2/Ap1s2/Ints3/Men1/…	70
BP	GO:0032956	regulation of actin cytoskeleton organization	61/2387	336/21092	0.000128133	0.00333203	0.00263247	Stap1/Ect2/Eln/Celsr1/Rhobtb1/F11r/Pak1/Ttc8/Arap1/Prkcd/Baiap2/Mef2c/Flna/Sh3bp1/Ppp1r9a/Cit/Nckap1l/Ssh3/Akap13/Nck1/Tacstd2/Fam107a/Dlc1/Stau2/Alms1/Cav3/Vangl2/Tmod2/Wnt11/Pxn/Plekhg2/Shank1/Actr3b/Jam3/Twf2/Rac1/Tpm1/Ctsl/Gmfg/Alox15/Gmfb/Rictor/Capg/Grb2/Phldb2/Add1/Synpo/Coro1a/Myo1f/Pfn1/Carmil1/Slit2/Abl1/Cfl1/Rapgef3/Rhoa/Nf2/Cdc42ep4/Icam1/Pecam1/Pdgfrb	61
BP	GO:0032647	regulation of interferon-alpha production	11/2387	28/21092	0.000130198	0.00337094	0.00266322	Dhx9/Chuk/Stat1/Tlr3/Flt3/Nmi/Gbp4/Tlr8/Tlr7/Tlr9/Zc3hav1	11
BP	GO:0051222	positive regulation of protein transport	75/2387	435/21092	0.000131494	0.00337703	0.00266803	Lpl/Ect2/Dhx9/Cnst/Camk1/Golph3/Chuk/Pak1/Glul/Nr1h2/Prkcd/Agt/Jup/Brca1/Gata3/Kif3a/Ipo5/Flna/Ncl/Pfkfb2/Tm9sf4/Nlrp1a/Nlrp1a/Nlrp1a/Nlrp1a/Clec9a/Prnp/Exoc1/Ang/Gsk3a/Arrb1/Hyal2/Zfp384/Stom/Il33/Cacna1d/Cacnb3/Flt3/Prkaa1/Doc2b/Gck/Akap5/Cib1/Tnfsf15/Oxct1/Myrip/Usp50/Mmp13/Tnfrsf4/Ano1/Egfr/Ffar2/Psen1/Mapk14/Postn/Slamf1/Rufy3/Sar1a/Sirt3/Tlr8/Syk/Ccr5/Cdk1/Baiap3/Commd1/Abl1/Wls/H2-T23/Sec2…	75
BP	GO:1902904	negative regulation of supramolecular fiber organization	32/2387	144/21092	0.000131573	0.00337703	0.00266803	Arap1/Prkcd/Ppp1r9a/Tacstd2/Dlc1/Hdgfl3/Map2/Cav3/Tmod2/Shank1/Cib1/Ckap2/Twf2/Hdac6/Dysf/Tpm1/Gmfg/Gmfb/Capg/Ldlr/Inpp5j/Phldb2/Add1/Coro1a/Pfn1/Carmil1/Slit2/Cfl1/Mid1/Map1a/Pecam1/Camsap3	32
BP	GO:0106027	neuron projection organization	24/2387	96/21092	0.00013358	0.00339912	0.00268548	Dlg4/Dctn1/Baiap2/Ppp1r9a/Ephb3/Prnp/Dtnbp1/Itga3/Stau2/Insr/Eef2k/Dock10/Shank1/Fcgr2b/Psen1/Hdac6/Epha4/Mtmr2/Sipa1l1/Tiam1/Dnm3/Tanc1/Cfl1/Map1a	24
BP	GO:1902749	regulation of cell cycle G2/M phase transition	24/2387	96/21092	0.00013358	0.00339912	0.00268548	Fhl1/Plk1/Brca1/Ticrr/Ccnb1/Syf2/Usp47/Babam2/Ccnd1/Dtl/Blm/Abraxas1/Lmnb1/Wnt10b/Orc1/Cenpf/Cdk4/Sin3a/Cdk1/Cdc25c/Cdc6/Camk2d/Rad17/Fbxo5	24
BP	GO:0001933	negative regulation of protein phosphorylation	72/2387	414/21092	0.00013529	0.00342793	0.00270824	Dab2/Pard3/Ptpn6/Slfn1/Slfn1/Slfn1/Slfn1/Atf3/Igfbp3/Spred2/Fkbp8/Casp3/Plk1/Prkcd/Ccnb1/Stk38/Mvp/Cdkn2c/Bdkrb2/Prnp/Dtnbp1/Foxm1/Ppp2ca/Nck1/Arrb1/Cdkn1a/Hyal2/Insr/Flcn/Ptpn1/Cyld/Timp3/Rassf2/Cav3/Sh3bp5/Strap/Ptprc/Prdm15/Cib1/Ncor1/Terf2ip/Psen2/Qars/Fgfr1op/Ager/Psen1/Pmepa1/Dab2ip/Trib3/Trib1/Pibf1/Errfi1/Gbp4/Zmynd11/Sirt3/Inpp5f/Inpp5j/Actb/Ddit4/Ctdspl/Rgs2/Slit2/Abl1/Men1/Men1/Nf2/Fbx…	72
BP	GO:0061136	regulation of proteasomal protein catabolic process	36/2387	170/21092	0.000146844	0.00370484	0.00292701	Dab2/Clec16a/Chfr/Rchy1/Arih1/Plk1/Pkd1/Ubqln4/Rhbdf1/Gsk3a/Csnk1e/Il33/Aurka/Usp14/Fam192a/Csnk1a1/Dnajb2/Psme1/Wnt10b/Psen2/Psen1/Dab2ip/Psmd14/Trib3/Trib1/Senp1/Usp13/Tmem67/Rnf144b/Tlk2/Commd1/Glmn/Gba/Cbfa2t3/Map1a/Atg7	36
BP	GO:0032946	positive regulation of mononuclear cell proliferation	31/2387	139/21092	0.000155139	0.00389753	0.00307925	Csf1/Pnp/Mef2c/Sash3/Jak3/Nckap1l/Nfatc2/Clcf1/Clcf1/Nck1/Tnfrsf13c/Cdkn1a/Blm/Traf6/Ticam1/Cd81/Ptprc/Tnfrsf4/Ager/Tnfsf13b/Slamf1/Ccr2/Slc4a1/Efnb1/Syk/Coro1a/Il12a/Cd74/Tlr9/Bcl6/H2-T23	31
BP	GO:0051251	positive regulation of lymphocyte activation	50/2387	263/21092	0.00016005	0.00400395	0.00316332	Icos/Lyst/Lck/Gata3/Nfkbiz/Pnp/Mef2c/Prdm1/Nsd2/Sash3/Jak3/Myb/Nckap1l/Nfatc2/Clcf1/Clcf1/Nck1/Tnfrsf13c/Cdkn1a/Cyld/Blm/H2-Ab1/Traf6/Ticam1/Cd81/Ptprc/Runx1/Trp53bp1/Tnfrsf4/Ager/Tnfsf13b/Zbtb16/Slamf1/Ccr2/Slc4a1/Efnb1/Syk/Malt1/Coro1a/H2-Aa/Il12a/Cd74/Il2rg/Tlr9/Bcl6/H2-T23/Ap3b1/Rhoa/Ulbp1/Ulbp1	50
BP	GO:0032434	regulation of proteasomal ubiquitin-dependent protein catabolic process	28/2387	121/21092	0.000163818	0.00408099	0.00322419	Dab2/Clec16a/Chfr/Rchy1/Arih1/Plk1/Ubqln4/Gsk3a/Csnk1e/Il33/Aurka/Usp14/Csnk1a1/Dnajb2/Wnt10b/Psen2/Psen1/Trib3/Trib1/Senp1/Rnf144b/Tlk2/Commd1/Glmn/Gba/Cbfa2t3/Map1a/Atg7	28
BP	GO:0031056	regulation of histone modification	33/2387	152/21092	0.000166504	0.00413055	0.00326335	Wdr61/Kdm4a/Ube2n/Kdm5a/Brca1/Gata3/Ccnb1/Myb/Dnmt1/Arrb1/Phf19/Flcn/Paxbp1/Srebf1/Rnf20/Zfp451/Cdk9/Ncor1/Bcor/Pax5/Snw1/Pml/Kdm2a/Atrx/Sin3a/Kdm4b/Hist1h1b/Men1/Men1/Bcl6/BC004004/Ehmt2/Atg7	33
BP	GO:0060236	regulation of mitotic spindle organization	13/2387	38/21092	0.000169706	0.00419245	0.00331225	Dctn1/Plk1/Pkd1/Chmp4b/Gpsm2/Tacc3/Hnrnpu/Hnrnpu/Parp3/Tpx2/Rae1/Psrc1/Smc3	13
BP	GO:0030261	chromosome condensation	14/2387	43/21092	0.000175755	0.00432387	0.00341608	Mcph1/Nusap1/Ncapd2/Ccnb1/Top2a/Hist1h1a/Smc2/Ncapg2/Ncapg/Dffb/Ncaph2/Hist1h1b/Cdk1/Cdca5	14
BP	GO:0018209	peptidyl-serine modification	59/2387	326/21092	0.000178561	0.00436538	0.00344887	Cd44/Camk1/Chuk/Pak1/Plk1/Pkd1/Morc3/Map4k1/Prkcd/Agt/Ccnb1/Stk38/Bdkrb2/Prkcb/Gsk3a/Csnk1e/Nck1/Mapkap1/Arrb1/Nrxn1/Ndnf/Clk1/Rassf2/Csnk1a1/Prkaa1/Dock7/Sgk3/Chek2/Wnk1/Terf2ip/Ulk1/Prkch/Ikbke/Egfr/Hdac6/Mapk14/Ppp1r1b/Mark2/Ikbkb/Ern1/Rictor/Mastl/Pdk2/Inpp5f/Smg1/Inpp5j/Mknk2/Atr/Syk/Ddit4/Bdnf/Aurkb/Cdk1/Tlk2/Ttk/Rapgef3/Camk2d/Map3k10/Vrk3	59
BP	GO:0051260	protein homooligomerization	64/2387	361/21092	0.000178915	0.00436538	0.00344887	Ect2/Pkm/Hcn1/Rad51/Spag9/Glul/Terf1/Pfkp/Pnpt1/Chmp4b/Angptl4/Kcng1/Kcna3/Prnp/Mgst1/Kcnb2/Crbn/Cth/Aqp11/Spast/Stom/Kctd10/Tor2a/Blm/Cnga2/Trpv6/Gls/Tk1/Atl2/Cep57/Slc1a1/Gnmt/Shkbp1/Bik/Nup54/Trp53bp1/Fas/Usp50/Ikbke/Mbl1/Srr/Kcna2/Gopc/Prmt8/Htra2/Gbp5/Prf1/Lamp2/Polq/Prmt1/Dffb/Apip/Kctd3/Mlkl/Slc1a5/Rasef/Micu1/Ehd1/Ehd1/Acads/Tmem120a/Gba/Cd79a/Atl1	64
BP	GO:0007033	vacuole organization	34/2387	159/21092	0.00018193	0.00441969	0.00349178	Smurf1/Lyst/Atg12/Ulk2/Chmp4b/Gabarap/Man2a1/Rab14/Atg2a/Atg2a/Nprl3/Hook1/Lrsam1/Map1lc3b/Snapin/Vps16/Ulk1/Irgm1/Irgm1/Irgm1/Psen1/Hook3/Atg16l1/Cln3/Scfd1/Rab3gap1/Emc6/Coro1a/Vmp1/Lamtor1/Syt7/Gba/Ehmt2/Atg7	34
BP	GO:2000060	positive regulation of ubiquitin-dependent protein catabolic process	23/2387	92/21092	0.000182632	0.00441969	0.00349178	Dab2/Ptk2/Smurf1/Chfr/Rchy1/Arih1/Plk1/Gsk3a/Csnk1e/Il33/Aurka/Csnk1a1/Dnajb2/Psen2/Psen1/Trib3/Trib1/Sumo3/Rnf144b/Trim67/Gba/Cbfa2t3/Atg7	23
BP	GO:0032607	interferon-alpha production	11/2387	29/21092	0.000188412	0.00445058	0.00351618	Dhx9/Chuk/Stat1/Tlr3/Flt3/Nmi/Gbp4/Tlr8/Tlr7/Tlr9/Zc3hav1	11
BP	GO:0051642	centrosome localization	11/2387	29/21092	0.000188412	0.00445058	0.00351618	Pard3/Nubp1/Ccdc141/Aurka/Gpsm2/Aspm/Sun2/Syne2/Nde1/Nin/Sema6a	11
BP	GO:0051984	positive regulation of chromosome segregation	11/2387	29/21092	0.000188412	0.00445058	0.00351618	Fen1/Ccnb1/Smc5/Ddx11/Smc6/Anapc5/Hnrnpu/Hnrnpu/Cdc6/Cenpe/Cdt1	11
BP	GO:0072395	signal transduction involved in cell cycle checkpoint	11/2387	29/21092	0.000188412	0.00445058	0.00351618	Plk1/Brca1/Babam2/Cdkn1a/Dtl/Gen1/Abraxas1/Chek2/Rbm38/Pml/Pidd1	11
BP	GO:0072401	signal transduction involved in DNA integrity checkpoint	11/2387	29/21092	0.000188412	0.00445058	0.00351618	Plk1/Brca1/Babam2/Cdkn1a/Dtl/Gen1/Abraxas1/Chek2/Rbm38/Pml/Pidd1	11
BP	GO:0072422	signal transduction involved in DNA damage checkpoint	11/2387	29/21092	0.000188412	0.00445058	0.00351618	Plk1/Brca1/Babam2/Cdkn1a/Dtl/Gen1/Abraxas1/Chek2/Rbm38/Pml/Pidd1	11
BP	GO:0043112	receptor metabolic process	40/2387	198/21092	0.000189185	0.00445111	0.0035166	Dab2/Pard3/Fnta/Nsf/Dlg4/Atxn2/Smurf1/Trappc4/Arap1/Git1/Adm/Pparg/Dtnbp1/Agrn/Lrpap1/Arrb1/Ptpn1/Cav3/Nedd4/Cd81/Akap5/Ulk1/Psen2/Pip5k1c/Psen1/Hdac6/Cd9/Inpp5f/Sh3gl2/Grb2/Mtmr2/Itgb2/Syk/Ap2b1/Dnm3/Gria3/Sec24a/Lamtor1/Pik3r4/Ap2m1	40
BP	GO:0006282	regulation of DNA repair	26/2387	110/21092	0.000192297	0.00450645	0.00356032	Dhx9/Rad51/Tex15/Aunip/Ube2n/Brca1/Pnp/Nsd2/Timeless/Parpbp/Rad51ap1/Babam2/Foxm1/Blm/Mms19/Ddx11/Abraxas1/Cdk9/Terf2ip/Trp53bp1/Egfr/Pml/Polq/Rmi2/Sirt6/Fign	26
BP	GO:0043406	positive regulation of MAP kinase activity	43/2387	218/21092	0.000194066	0.00452999	0.00357892	Dab2/Pak1/Spag9/Iqgap3/Map4k1/Prkcd/Madd/Kras/Map3k5/Akap13/Arrb1/Insr/Map3k20/Pla2g1b/Ptpn1/Tnfrsf11a/Plce1/Vangl2/Pxn/Traf6/Cd81/Ptprc/Itga1/Ajuba/Egfr/Ager/Psen1/Fgd2/Dab2ip/Epha4/Ern1/Pde5a/Syk/Tiam1/Lamtor3/Mlkl/Cd74/Tlr9/Dvl2/Map2k6/Ezh2/Pdgfrb/Map3k10	43
BP	GO:0042113	B cell activation	51/2387	272/21092	0.0001972	0.00458509	0.00362245	Ptpn6/Bank1/Cd180/Casp3/Notch2/Prkcd/Pnp/Mef2c/Prdm1/Nsd2/Sash3/Blnk/Jak3/Myb/Cxcr5/Btla/Prkcb/Nckap1l/Nfatc2/Clcf1/Clcf1/Bcl11a/Tnfrsf13c/Cdkn1a/Cyld/H2-Ab1/Flt3/Siglecg/Ticam1/Ms4a1/Cd81/Dock10/Ptprc/Fcgr2b/Ikzf3/Trp53bp1/Fas/Dll1/Tnfrsf13b/Tnfrsf4/Tnfsf13b/Nfatc1/Syk/Malt1/Dock11/Cd74/Il2rg/Abl1/Tlr9/Bcl6/Cd79a	51
BP	GO:0010389	regulation of G2/M transition of mitotic cell cycle	21/2387	81/21092	0.000199023	0.00460939	0.00364166	Fhl1/Brca1/Ticrr/Ccnb1/Syf2/Usp47/Ccnd1/Dtl/Blm/Lmnb1/Wnt10b/Orc1/Cenpf/Cdk4/Sin3a/Cdk1/Cdc25c/Cdc6/Camk2d/Rad17/Fbxo5	21
BP	GO:0045785	positive regulation of cell adhesion	70/2387	405/21092	0.00020084	0.00462693	0.00365551	Cd44/Dab2/Ptk2/Icos/Ptpn6/Lck/Jup/Csf1/Gata3/Nfkbiz/Pnp/Fn1/Flna/Ninj1/Sash3/Jak3/Myb/Nckap1l/Itga3/Stx3/Edil3/Nck1/Tnfrsf13c/Ets1/Ndnf/Flcn/Cyld/Blm/Mmrn1/H2-Ab1/Traf6/Ptprc/Runx1/Cib1/Ager/Tnfsf13b/Afdn/Rac1/Dysf/Tpm1/Tfe3/Zbtb16/Adam19/Alox15/Slamf1/Ccr2/Hyal1/Slc4a1/Cass4/Kif26b/Efnb1/Syk/Malt1/Map4k4/Ccr5/Coro1a/H2-Aa/Il12a/Cd74/Carmil1/Il2rg/Abl1/Cfl1/Bcl6/H2-T23/Kdr/Ap3b1/Rhoa/Fbln2/Icam1	70
BP	GO:0043462	regulation of ATPase activity	17/2387	59/21092	0.000201341	0.00462693	0.00365551	Dhx9/Agrn/Dnajb2/Atp1b1/Myl4/Vcpkmt/Pxk/Hnrnpu/Hnrnpu/Tpm1/Atpif1/Ppif/Pfn1/Tlr9/Rapgef3/Zc3hav1/Tor1aip1	17
BP	GO:0032271	regulation of protein polymerization	42/2387	212/21092	0.000207315	0.00474583	0.00374945	Eln/Rhobtb1/Pak1/Terf1/Dctn1/Prkcd/Baiap2/Ppp1r9a/Nckap1l/Nck1/Map2/Cav3/Tmod2/Plekhg2/Vdac2/Actr3b/Clip1/Twf2/Rac1/Tpm1/Gmfg/Alox15/Gmfb/Rictor/Capg/Inpp5j/Grb2/Pde4dip/Add1/Coro1a/Pfn1/Carmil1/Slit2/Abl1/Cfl1/Rhoa/Cdc42ep4/Psrc1/Nin/Icam1/Pecam1/Camsap3	42
BP	GO:0032945	negative regulation of mononuclear cell proliferation	22/2387	87/21092	0.000209489	0.00475083	0.0037534	Cd44/Ptpn6/Slfn1/Slfn1/Slfn1/Slfn1/Casp3/Zc3h12d/Arg2/Prdm1/Btla/Prnp/Il20rb/H2-Ab1/Sox11/Fcgr2b/Tmem131l/Tnfrsf13b/Pde5a/H2-Aa/Twsg1/Glmn	22
BP	GO:0050672	negative regulation of lymphocyte proliferation	22/2387	87/21092	0.000209489	0.00475083	0.0037534	Cd44/Ptpn6/Slfn1/Slfn1/Slfn1/Slfn1/Casp3/Zc3h12d/Arg2/Prdm1/Btla/Prnp/Il20rb/H2-Ab1/Sox11/Fcgr2b/Tmem131l/Tnfrsf13b/Pde5a/H2-Aa/Twsg1/Glmn	22
BP	GO:0055088	lipid homeostasis	30/2387	135/21092	0.000210051	0.00475083	0.0037534	Lpl/Lyst/Acoxl/Got1/Gpihbp1/Zbtb20/Nr1h2/Angptl4/Srebf2/Raly/Alms1/Dgat1/Plscr3/Cav3/Prkaa1/Acox1/Gck/Ncor1/Abhd4/Pex2/Insig1/Ldlr/Soat1/Commd1/Ehd1/Ehd1/Sec24a/Acox2/Lamtor1/Atg7	30
BP	GO:1902115	regulation of organelle assembly	40/2387	199/21092	0.000211356	0.00475083	0.0037534	Tbc1d30/Atxn2/Kctd17/Plk1/Map4/Senp6/Mef2c/Chmp4b/Mdm1/Spag5/Stil/Nprl3/Akap13/Nrxn1/Lrsam1/Nptxr/Pan3/Cyld/Cav3/Cep192/Gpsm2/Prkaa1/Ulk1/Mark4/Hnrnpu/Hnrnpu/Odf2l/Sdc1/Palld/Pqbp1/Tmem67/Sipa1l1/Scfd1/Syne2/Rab3gap1/Nptx1/Rhoa/Smc3/Cenpj/Ehmt2	40
BP	GO:0002250	adaptive immune response	72/2387	420/21092	0.00021154	0.00475083	0.0037534	Cd44/Ptpn6/Lyst/Tsta3/Prkcd/C4b/Arg2/Gata3/Nfkbiz/Pnp/Ctsh/Mef2c/Kdm5d/Prdm1/Nsd2/Sash3/Klrk1/Cd1d2/Jak3/Btla/Slamf7/Prkcb/Clcf1/Clcf1/Rc3h2/Tnfrsf13c/Il20rb/Il33/Tnfrsf11a/Gzmb/H2-Ab1/Myo1g/H2-Q7/Tap2/Traf6/Siglecg/Nedd4/Ptprc/Fcer2a/Fcgr2b/Nfkb2/H60c/Jchain/Trp53bp1/Fas/Tnfrsf13b/Mbl1/Ager/Tnfsf13b/Jam3/Pvr/Tfe3/Il18r1/Alox15/Slamf1/Ccr2/Serping1/Prf1/Mcoln2/Syk/Malt1/Il12a/Cd74/Irf4/Bcl6/H2-T2…	72
BP	GO:0002697	regulation of immune effector process	69/2387	399/21092	0.000218587	0.00489056	0.00386379	Pglyrp1/Apobec3/Dhx9/Ptpn6/Stat1/Spink5/Gata3/Nfkbiz/Pnp/Klrb1b/Nsd2/Sash3/Klrk1/Cd1d2/A2m/Jak3/Myb/Clcf1/Clcf1/Rc3h2/Klrb1c/Nppa/Ankrd17/Il20rb/Il33/Tlr3/H2-Q7/Tap2/Traf6/Siglecg/Ticam1/Ptprc/Fcer2a/Fcgr2b/H60c/Pcbp2/Spon2/Trp53bp1/Htra1/Tnfrsf4/Ffar2/Ager/Pvr/Mapk14/Pum1/Pum1/Il18r1/Slamf1/Ccr2/Pml/Serping1/Pqbp1/Gbp4/Sin3a/Itgb2/Syk/Malt1/Traf3/Il12a/Cd37/Cd74/Tlr9/Bcl6/H2-T23/Zc3hav1/Ulbp1/Ul…	69
BP	GO:0022407	regulation of cell-cell adhesion	68/2387	392/21092	0.000220641	0.00491511	0.00388319	Cd44/Ptk2/Icos/Ptpn6/Slfn1/Slfn1/Slfn1/Slfn1/Lck/Casp3/Zc3h12d/Prkcd/Arg2/Gata3/Nfkbiz/Pnp/Ephb3/Sash3/Jak3/Myb/Btla/Prnp/Nckap1l/Rc3h2/Nck1/Tnfrsf13c/Ets1/Il20rb/Cyld/Blm/H2-Ab1/Traf6/Ptprc/Runx1/Wnk1/Tmem131l/Ager/Tnfsf13b/Afdn/Cd9/Zbtb16/Mapk14/Adam19/Alox15/Slamf1/Ccr2/Pde5a/Slc4a1/Kif26b/Efnb1/Syk/Malt1/Ccr5/Coro1a/H2-Aa/Il12a/Cd74/Il2rg/Abl1/Twsg1/Bcl6/Fermt3/H2-T23/Ap3b1/Rhoa/Nf2/Glmn/Icam1	68
BP	GO:0120033	negative regulation of plasma membrane bounded cell projection assembly	10/2387	25/21092	0.000221342	0.00491511	0.00388319	Tbc1d30/Stap1/Map4/Prkcd/Tacstd2/Nrxn1/Odf2l/Arhgap24/Slit2/Cfl1	10
BP	GO:0019439	aromatic compound catabolic process	78/2387	464/21092	0.000223516	0.00494487	0.0039067	Dhx9/Pkm/Cnot7/Slfn8/Slfn8/Slfn8/Cnot8/Moxd1/Igfbp3/Sidt2/Zbtb20/Lrpprc/Zc3h12d/Pfkp/Hnrnpc/Pnp/Entpd3/Pnpt1/Fen1/Pfkfb2/Acaa1a/Hnrnpr/Snd1/Helz2/Thrap3/Insr/Pan3/Nanos1/Dnase2a/Khsrp/Ugt1a7c/Blvrb/Cyp1a1/Slfn14/Slfn14/Slfn14/Slfn14/Dhx34/Gen1/Dna2/Prkaa1/Eif6/Khk/Tet2/Gck/Ncor1/Rbm38/Pon1/Nt5e/Rnaseh2c/Hnrnpu/Hnrnpu/Ddx5/E2f1/Pum1/Pum1/Zc3h14/Tnrc6c/Pde5a/Ago1/Smg1/Mettl3/Dffb/Ddit4/Edc4/Eno4/Pa…	78
BP	GO:0046785	microtubule polymerization	20/2387	76/21092	0.000225209	0.0049493	0.0039102	Pak1/Terf1/Dctn1/Cetn3/Hdgfl3/Map2/Cav3/Cep192/Clip1/Rac1/Efcab11/Inpp5j/Pde4dip/Nde1/Abl1/Psrc1/Cenpj/Nin/Fbxo5/Camsap3	20
BP	GO:0003298	physiological muscle hypertrophy	13/2387	39/21092	0.000228382	0.0049493	0.0039102	Pak1/Agt/Col14a1/Fdps/Gsk3a/Akap13/Trip10/Cav3/Sorbs2/Adra1b/Rgs2/Wisp1/Camk2d	13
BP	GO:0003301	physiological cardiac muscle hypertrophy	13/2387	39/21092	0.000228382	0.0049493	0.0039102	Pak1/Agt/Col14a1/Fdps/Gsk3a/Akap13/Trip10/Cav3/Sorbs2/Adra1b/Rgs2/Wisp1/Camk2d	13
BP	GO:0061049	cell growth involved in cardiac muscle cell development	13/2387	39/21092	0.000228382	0.0049493	0.0039102	Pak1/Agt/Col14a1/Fdps/Gsk3a/Akap13/Trip10/Cav3/Sorbs2/Adra1b/Rgs2/Wisp1/Camk2d	13
BP	GO:0002764	immune response-regulating signaling pathway	57/2387	315/21092	0.000228577	0.0049493	0.0039102	Stap1/Ptpn6/Lck/Ube2n/Gata3/Nfkbiz/Fyb/Ctsh/Mef2c/Plekha1/Cd300lf/Klrk1/Btla/Prkcb/Prnp/Nckap1l/Nfatc2/Rc3h2/Tlr11/Ankrd17/Il20rb/Cyld/Tlr3/Cd19/Cacnb3/Myo1g/Traf6/Rbck1/Peli3/Ticam1/Ptprc/Fcgr2b/Wnk1/Ticam2/Psen2/Prkch/Ffar2/Psen1/Dab2ip/Pum1/Pum1/Gpr33/Tlr8/Tlr7/Sppl3/Syk/Malt1/Traf3/Abl1/Irf4/Gcsam/Tlr9/Rps6ka3/Zc3hav1/C5ar1/Blk/Cd79a	57
BP	GO:0000422	autophagy of mitochondrion	18/2387	65/21092	0.000229559	0.0049493	0.0039102	Clec16a/Smurf1/Atg12/Gabarap/Atg2a/Atg2a/Gsk3a/Map1lc3b/Srebf1/Usp30/Ulk1/Sqstm1/Hdac6/Htra2/Atpif1/Fbxo7/Gba/Atg7	18
BP	GO:0061726	mitochondrion disassembly	18/2387	65/21092	0.000229559	0.0049493	0.0039102	Clec16a/Smurf1/Atg12/Gabarap/Atg2a/Atg2a/Gsk3a/Map1lc3b/Srebf1/Usp30/Ulk1/Sqstm1/Hdac6/Htra2/Atpif1/Fbxo7/Gba/Atg7	18
BP	GO:0046700	heterocycle catabolic process	76/2387	450/21092	0.000230852	0.00495913	0.00391796	Dhx9/Pkm/Cnot7/Slfn8/Slfn8/Slfn8/Cnot8/Igfbp3/Sidt2/Zbtb20/Lrpprc/Zc3h12d/Pfkp/Hnrnpc/Pnp/Entpd3/Pnpt1/Fen1/Pfkfb2/Hnrnpr/Snd1/Helz2/Thrap3/Insr/Pan3/Nanos1/Dnase2a/Khsrp/Ugt1a7c/Blvrb/Cyp1a1/Slfn14/Slfn14/Slfn14/Slfn14/Dhx34/Gen1/Dna2/Prkaa1/Eif6/Khk/Tet2/Gck/Ncor1/Rbm38/Gsta3/Nt5e/Rnaseh2c/Hnrnpu/Hnrnpu/Ddx5/E2f1/Pum1/Pum1/Zc3h14/Tnrc6c/Pde5a/Ago1/Smg1/Mettl3/Dffb/Ddit4/Edc4/Eno4/Pabpc1/Hmox2/M…	76
BP	GO:0000281	mitotic cytokinesis	21/2387	82/21092	0.000239375	0.00512365	0.00404795	Kif23/Ect2/Sept10/Nusap1/Plk1/Racgap1/Anln/Chmp4b/Cit/Kif4/Spast/Cenpa/Brca2/Ckap2/Sept8/Birc5/Sept3/Cfl1/Rhoa/Kif20b/Cdt1	21
BP	GO:0034728	nucleosome organization	30/2387	136/21092	0.000240782	0.00513523	0.00405709	Smarcd2/Hist1h3a/Hist1h4f/Asf1b/Shprh/A730008H23Rik/Hist1h1a/Smarca2/Hist1h2bb/Arid1a/Cenpa/Brd2/Cabin1/Hist1h3c/Hist2h3b/Hist1h2bk/Ino80/Naa60/Hist1h4b/Hist1h3h/Hist2h3c2/Hist2h3c1/Hist2h2bb/Hist1h3g/Atrx/Hist1h2bm/Cenpp/Hist1h1b/Hist1h3i/Oip5	30
BP	GO:0002495	antigen processing and presentation of peptide antigen via MHC class II	9/2387	21/21092	0.000246577	0.00523997	0.00413984	H2-Ob/H2-DMb1/H2-Ab1/Ctse/Traf6/March1/Fcgr2b/H2-Aa/Cd74	9
BP	GO:1903364	positive regulation of cellular protein catabolic process	29/2387	130/21092	0.000247805	0.00524727	0.00414561	Dab2/Ptk2/Smurf1/Chfr/Rchy1/Arih1/Plk1/Gsk3a/Csnk1e/Il33/Aurka/Csnk1a1/Dnajb2/Cd81/Psen2/Psen1/Dab2ip/Trib3/Trib1/Sumo3/Ldlr/Usp13/Tmem67/Atpif1/Rnf144b/Trim67/Gba/Cbfa2t3/Atg7	29
BP	GO:0006476	protein deacetylation	22/2387	88/21092	0.000249864	0.00525334	0.00415041	Fnta/Spred2/Prdm5/Kdm5a/Ndst1/Hopx/Srebf1/Prkaa1/Hdac11/Ncor1/Sirt7/Hdac6/Elk4/Dysf/Pml/Sirt3/Sin3a/Fry/Bcl6/Smarcad1/BC004004/Hdac8	22
BP	GO:0050871	positive regulation of B cell activation	22/2387	88/21092	0.000249864	0.00525334	0.00415041	Pnp/Mef2c/Prdm1/Nsd2/Sash3/Nckap1l/Nfatc2/Clcf1/Clcf1/Tnfrsf13c/Cdkn1a/Ticam1/Cd81/Ptprc/Trp53bp1/Tnfrsf4/Tnfsf13b/Syk/Cd74/Il2rg/Tlr9/Bcl6	22
BP	GO:0031398	positive regulation of protein ubiquitination	25/2387	106/21092	0.000262321	0.00549577	0.00434193	Chfr/Rchy1/Plk1/Ube2n/Brca1/Rassf1/Gsk3a/Skp2/Skp2/Fam107a/Arrb1/Dnajb2/Rnf20/Ticam1/Fgfr3/Cdk9/Fanci/Nhlrc1/Nmi/Trib3/Trib1/Mastl/Kdm2a/Cdc20/Commd1	25
BP	GO:0002460	adaptive immune response based on somatic recombination of immune receptors built from immunoglobulin superfamily domains	54/2387	296/21092	0.000267209	0.00555957	0.00439234	Ptpn6/Lyst/Tsta3/Prkcd/C4b/Gata3/Nfkbiz/Pnp/Ctsh/Mef2c/Kdm5d/Nsd2/Sash3/Cd1d2/Jak3/Clcf1/Clcf1/Rc3h2/Tnfrsf13c/Il20rb/Il33/Gzmb/H2-Ab1/Myo1g/H2-Q7/Tap2/Traf6/Ptprc/Fcer2a/Fcgr2b/Nfkb2/H60c/Trp53bp1/Fas/Mbl1/Ager/Tnfsf13b/Pvr/Il18r1/Slamf1/Ccr2/Serping1/Prf1/Malt1/Il12a/Cd74/Irf4/Bcl6/H2-T23/Ulbp1/Ulbp1/Fcgr3/Rab27a/Icam1	54
BP	GO:0061842	microtubule organizing center localization	11/2387	30/21092	0.000267242	0.00555957	0.00439234	Pard3/Nubp1/Ccdc141/Aurka/Gpsm2/Aspm/Sun2/Syne2/Nde1/Nin/Sema6a	11
BP	GO:1990778	protein localization to cell periphery	60/2387	338/21092	0.000270221	0.00560189	0.00442578	Tspan33/Dab2/F11r/Cnst/Nsf/Dlg4/Golph3/Ttc8/Nubp1/Git1/Lztfl1/Gpc6/Jup/Anln/Fyb/Flna/Zdhhc23/Prnp/Itga3/Stx3/Kcnb2/Epb41/Nrxn1/Nptxr/Myo5a/Cav3/Gpsm2/Cacnb3/Atp1b1/D230025D16Rik/Snap23/Akap5/Cib1/Mrap2/Sqstm1/Egfr/Rhoq/Ttc7/Clip1/Gopc/Afdn/Atp2c2/Rac1/Ikbkb/Camk2g/Epb41l3/Kcnip4/Kif1b/Cln3/Actb/Stx8/Commd1/Nptx1/Myl12a/Ankrd9/Rab3a/Rab3a/Rapgef6/Ap2m1/Camk2d	60
BP	GO:0002260	lymphocyte homeostasis	20/2387	77/21092	0.000272277	0.00560531	0.00442848	Cd44/Casp3/Mef2c/Jak3/Tsc22d3/Nckap1l/Rc3h2/Tnfrsf13c/Dock10/Ccnb2/Fas/Tnfrsf13b/Tnfrsf4/Tnfsf13b/Ikbkb/Coro1a/Slc40a1/Dock11/Cd74/Abl1	20
BP	GO:0032465	regulation of cytokinesis	20/2387	77/21092	0.000272277	0.00560531	0.00442848	Kif23/Ect2/Prc1/Plk1/Racgap1/Git1/E2f8/Cit/Cxcr5/Pkp4/Spast/Flcn/Aurka/Brca2/E2f7/Aurkb/Rhoa/Cdc6/Kif20b/Pik3r4	20
BP	GO:0050671	positive regulation of lymphocyte proliferation	30/2387	137/21092	0.000275448	0.00565098	0.00446456	Pnp/Mef2c/Sash3/Jak3/Nckap1l/Nfatc2/Clcf1/Clcf1/Nck1/Tnfrsf13c/Cdkn1a/Blm/Traf6/Ticam1/Cd81/Ptprc/Tnfrsf4/Ager/Tnfsf13b/Slamf1/Ccr2/Slc4a1/Efnb1/Syk/Coro1a/Il12a/Cd74/Tlr9/Bcl6/H2-T23	30
BP	GO:2000779	regulation of double-strand break repair	18/2387	66/21092	0.000282647	0.00577866	0.00456543	Rad51/Tex15/Aunip/Nsd2/Timeless/Parpbp/Rad51ap1/Foxm1/Blm/Mms19/Ddx11/Terf2ip/Trp53bp1/Pml/Polq/Rmi2/Sirt6/Fign	18
BP	GO:0045350	interferon-beta biosynthetic process	6/2387	10/21092	0.000292405	0.00589684	0.0046588	Tlr3/Ticam1/Nmi/Tlr8/Tlr7/Tlr9	6
BP	GO:0045357	regulation of interferon-beta biosynthetic process	6/2387	10/21092	0.000292405	0.00589684	0.0046588	Tlr3/Ticam1/Nmi/Tlr8/Tlr7/Tlr9	6
BP	GO:0048671	negative regulation of collateral sprouting	6/2387	10/21092	0.000292405	0.00589684	0.0046588	Ulk2/Bcl11a/Spg20/Ulk1/Rgma/Ifrd1	6
BP	GO:1900272	negative regulation of long-term synaptic potentiation	6/2387	10/21092	0.000292405	0.00589684	0.0046588	Ppp1r9a/Prnp/Fam107a/Ager/Epha4/Abl1	6
BP	GO:0008156	negative regulation of DNA replication	12/2387	35/21092	0.000293665	0.00590216	0.00466301	Lig3/Terf1/Msh3/Timeless/Chek2/Brca2/Atr/Pds5a/Smc3/Rad17/Fbxo5/Atg7	12
BP	GO:0043244	regulation of protein complex disassembly	26/2387	113/21092	0.000303438	0.00607798	0.00480191	Clec16a/Ubqln4/Sh3bp1/Insr/Hdgfl3/Map2/Tmod2/Eif5a/Cib1/Ckap2/Irgm1/Irgm1/Irgm1/Twf2/Hdac6/Dysf/Tpm1/Ogfod1/Capg/Add1/Carmil1/Cfl1/Mid1/Gba/Map1a/Camsap3	26
BP	GO:0090398	cellular senescence	17/2387	61/21092	0.0003125	0.00623381	0.00492503	Nuak1/Prkcd/Arg2/Rbl1/Pnpt1/Smc5/Kras/Cdkn1a/Rsl1d1/Smc6/Arntl/Mapk14/Pml/Abl1/Bcl6/Ypel3/Fbxo5	17
BP	GO:0051302	regulation of cell division	33/2387	157/21092	0.00031332	0.00623381	0.00492503	Kif23/Ect2/Prc1/Txnip/Plk1/Racgap1/Git1/E2f8/Rbl1/Cit/Cxcr5/Pkp4/Spast/Flcn/Blm/Aurka/Prdm15/Cib1/Orc6/Dll1/Brca2/Kif18b/Aspm/Vegfb/E2f7/Aurkb/Men1/Men1/Rhoa/Cdc6/Thoc5/Kif20b/Pik3r4	33
BP	GO:0007254	JNK cascade	40/2387	203/21092	0.00032525	0.00643597	0.00508474	Dab2/Ptk2/Pak1/Spag9/Map4k1/Traf4/Dtnbp1/Map3k5/Eda2r/Map3k20/Ptpn1/Cyld/Tnfrsf11a/Tlr3/Rassf2/Vangl2/Traf6/Lmnb1/Fcgr2b/Ncor1/Hacd3/Egfr/Ager/Fgd2/Dab2ip/Epha4/Trib1/Slamf1/Ern1/Zmynd11/Syk/Tiam1/Map4k4/Mlkl/Men1/Men1/Tlr9/Dvl2/Plcb1/Map3k10	40
BP	GO:0035023	regulation of Rho protein signal transduction	29/2387	132/21092	0.000325689	0.00643597	0.00508474	Ect2/Mcf2l/Spata13/F2rl3/Itga3/Akap13/Itsn1/Dlc1/Arrb1/Col3a1/Flcn/Arhgef1/P2ry10/Trio/Plekhg2/Adra1b/Fgd2/Arhgef28/Fgd1/Arhgef25/Arhgap42/Tiam1/Arhgef6/Eps8l2/Abl1/Bcl6/P2ry10b/Pdgfrb/F2rl2	29
BP	GO:0042692	muscle cell differentiation	66/2387	383/21092	0.000327262	0.00643597	0.00508474	Bhlhe41/Camk1/Actg1/Chuk/Pak1/Mef2a/Spag9/Adm/Agt/Col14a1/Mef2c/Cav2/Hopx/Fdps/Kras/Nfatc2/Gsk3a/Akap13/Dnmt1/Cth/Smarca2/Tbx5/Ankrd17/Trip10/Arid1a/Cav3/Sorbs2/Vangl2/Tmod2/Ccl8/Sgcd/Cdk9/Eif5a/Wnt10b/Rbm38/Ldb3/Dll1/Popdc2/Hnrnpu/Hnrnpu/Adra1b/Hdac6/Dysf/Mapk14/Nfatc1/Hey1/Cdon/Cyp26b1/Ifrd1/Epc1/Bdnf/Myh11/Sort1/Mkl2/Rgs2/Wisp1/Zeb1/Ehd1/Ehd1/Tanc1/Myh9/Glmn/Ezh2/Camk2d/Pdgfrb/Atg7	66
BP	GO:0031647	regulation of protein stability	48/2387	257/21092	0.000327823	0.00643597	0.00508474	Chfr/Gpihbp1/Plk1/Morc3/Ccnh/Ctsh/Flna/Ipo9/Trim21/Syvn1/Wiz/Usp47/Kras/Prnp/Rassf1/Fam107a/Naa16/Usp28/Aurka/Rassf2/Srebf1/Cd81/Atp1b1/Chek2/Wnt10b/Zfp207/Hip1/Hdac6/Cct2/Pex2/Epha4/Crtap/Pml/Usp40/Usp13/Lamp2/Wdr81/Stxbp4/Rab3gap1/Fbxl3/Aak1/Pfn1/Tcp1/Commd1/Sirt6/Nf2/Fbxo7/Hdac8	48
BP	GO:0070665	positive regulation of leukocyte proliferation	31/2387	145/21092	0.000343719	0.00672578	0.0053137	Csf1/Pnp/Mef2c/Sash3/Jak3/Nckap1l/Nfatc2/Clcf1/Clcf1/Nck1/Tnfrsf13c/Cdkn1a/Blm/Traf6/Ticam1/Cd81/Ptprc/Tnfrsf4/Ager/Tnfsf13b/Slamf1/Ccr2/Slc4a1/Efnb1/Syk/Coro1a/Il12a/Cd74/Tlr9/Bcl6/H2-T23	31
BP	GO:0046637	regulation of alpha-beta T cell differentiation	18/2387	67/21092	0.000346095	0.00673929	0.00532438	Gata3/Nfkbiz/Pnp/Prdm1/Sash3/Jak3/Myb/Nckap1l/Rc3h2/Runx1/Zbtb16/Ccr2/Syk/Malt1/Il2rg/Bcl6/Ap3b1/Rhoa	18
BP	GO:0002696	positive regulation of leukocyte activation	56/2387	313/21092	0.000346683	0.00673929	0.00532438	Stap1/Icos/Lyst/Lck/Gata3/Nfkbiz/Pnp/Mef2c/Prdm1/Nsd2/Sash3/Klrk1/Jak3/Myb/Nckap1l/Nfatc2/Clcf1/Clcf1/Nck1/Tnfrsf13c/Cdkn1a/Nppa/Il33/Cyld/Blm/H2-Ab1/Traf6/Ticam1/Cd81/Ptprc/Runx1/Trp53bp1/Cd300lb/Tnfrsf4/Ager/Tnfsf13b/Zbtb16/Slamf1/Ccr2/Slc4a1/Efnb1/Itgb2/Syk/Malt1/Coro1a/H2-Aa/Il12a/Cd74/Il2rg/Tlr9/Bcl6/H2-T23/Ap3b1/Rhoa/Ulbp1/Ulbp1	56
BP	GO:0002429	immune response-activating cell surface receptor signaling pathway	37/2387	184/21092	0.000354535	0.0068694	0.00542717	Stap1/Ptpn6/Lck/Ube2n/Gata3/Nfkbiz/Fyb/Mef2c/Plekha1/Klrk1/Prkcb/Prnp/Nckap1l/Nfatc2/Rc3h2/Cyld/Cd19/Cacnb3/Myo1g/Traf6/Rbck1/Ptprc/Fcgr2b/Wnk1/Psen2/Prkch/Ffar2/Psen1/Gpr33/Sppl3/Syk/Malt1/Abl1/Gcsam/C5ar1/Blk/Cd79a	37
BP	GO:0045132	meiotic chromosome segregation	23/2387	96/21092	0.000356697	0.00687148	0.00542881	Ccne2/Pttg1/Bub1b/Ccne1/Trip13/Tex15/Terf1/Plk1/Cenpx/Top2a/Blm/Smc2/Bub1/Brca2/Cenpc1/Fancd2/Ncaph2/Brip1/Mus81/Ttk/Sgo1/Ehmt2/Eme1	23
BP	GO:0043902	positive regulation of multi-organism process	35/2387	171/21092	0.00035696	0.00687148	0.00542881	Pglyrp1/Tbc1d20/Dhx9/Cnot7/Cd180/Chmp4b/Cav2/Trim21/Top2a/Lrsam1/Ankrd17/Stom/Aurka/Traf6/Chd1/Fcer2a/Cib1/Hacd3/Srpk2/Ppib/Snw1/Pum1/Pum1/Cfap69/Pde5a/Prf1/Ccr5/Pabpc1/Pfn1/Cd74/Cfl1/Zc3hav1/Lhfpl2/Smc3/Plcb1	35
BP	GO:0002443	leukocyte mediated immunity	63/2387	363/21092	0.00036322	0.00696937	0.00550615	Ptpn6/Lyst/Tsta3/Prkcd/C4b/Gata3/Pnp/Klrb1b/Ctsh/Kdm5d/Nsd2/Sash3/Klrk1/Cd1d2/Jak3/Clcf1/Clcf1/Prdx1/Klrb1c/Nppa/Pla2g1b/Il20rb/Tlr3/Gzmb/H2-Ab1/Myo1g/H2-Q7/Tap2/Traf6/Ticam1/Ptprc/Fcer2a/Fcgr2b/Snap23/H60c/Spon2/Trp53bp1/Cd300lb/Fas/Mbl1/Ager/Pvr/Il18r1/Klrd1/Slamf1/Ccr2/Serping1/Prf1/Itgb2/Syk/Malt1/Coro1a/Myo1f/Il12a/Cd74/Tlr9/Bcl6/H2-T23/Ulbp1/Ulbp1/Fcgr3/Rab27a/Icam1	63
BP	GO:0032481	positive regulation of type I interferon production	15/2387	51/21092	0.000367557	0.00702983	0.00555392	Dhx9/Chuk/Stat1/Zbtb20/Polr3f/Tlr3/Flt3/Polr3c/Ticam1/Pqbp1/Tlr8/Tlr7/Syk/Tlr9/Zc3hav1	15
BP	GO:0032467	positive regulation of cytokinesis	11/2387	31/21092	0.000372147	0.00703946	0.00556153	Kif23/Ect2/Racgap1/Cit/Cxcr5/Pkp4/Spast/Aurkb/Rhoa/Cdc6/Kif20b	11
BP	GO:0048668	collateral sprouting	11/2387	31/21092	0.000372147	0.00703946	0.00556153	Ulk2/Bcl11a/Spg20/Ulk1/Hdac6/Rgma/Ifrd1/Bdnf/Abl1/Sema4d/Nin	11
BP	GO:0050867	positive regulation of cell activation	58/2387	328/21092	0.000374731	0.00703946	0.00556153	Stap1/Icos/Lyst/Lck/Gata3/Nfkbiz/Pnp/Mef2c/Prdm1/Nsd2/Sash3/Klrk1/Jak3/Myb/Nckap1l/Nfatc2/Clcf1/Clcf1/Nck1/Tnfrsf13c/Cdkn1a/Nppa/Il33/Dgat1/Cyld/Blm/H2-Ab1/Traf6/Ticam1/Cd81/Ptprc/Runx1/Trp53bp1/Cd300lb/Tnfrsf4/Ager/Tnfsf13b/Zbtb16/Slamf1/Ccr2/Slc4a1/Efnb1/Itgb2/Syk/Malt1/Coro1a/H2-Aa/Il12a/Cd74/Il2rg/Tlr9/Bcl6/H2-T23/Ap3b1/Rhoa/Ulbp1/Ulbp1/Pdgfrb	58
BP	GO:0043405	regulation of MAP kinase activity	53/2387	293/21092	0.000374849	0.00703946	0.00556153	Dab2/Ptpn6/Pak1/Spag9/Spred2/Iqgap3/Map4k1/Prkcd/Stk38/Madd/Kras/Dtnbp1/Map3k5/Akap13/Arrb1/Hyal2/Insr/Map3k20/Pla2g1b/Ptpn1/Tnfrsf11a/Cav3/Plce1/Vangl2/Pxn/Traf6/Cd81/Ptprc/Itga1/Ajuba/Egfr/Ager/Psen1/Fgd2/Dab2ip/Epha4/Trib3/Trib1/Ern1/Pde5a/Syk/Tiam1/Lamtor3/Mlkl/Cd74/Rgs2/Tlr9/Dvl2/Map2k6/Gba/Ezh2/Pdgfrb/Map3k10	53
BP	GO:0051321	meiotic cell cycle	53/2387	293/21092	0.000374849	0.00703946	0.00556153	Ccne2/Pttg1/Bub1b/Ccne1/Rad51/Trip13/Tex15/Rpa1/Nsun2/Terf1/Plk1/Ncapd2/Cenpx/Msh3/Mybl1/Top2a/Kif18a/Ppp2ca/Insr/Mapk1ip1/Mki67/Blm/Aurka/Grb14/Smc2/Bub1/Brca2/Cenpc1/Fanca/Aspm/Fancd2/Marf1/Cyp26b1/Mastl/Mettl3/Atrx/Sun2/Ncaph2/Cdc20/Brip1/Mus81/Rbm7/Cdc25c/Ttk/Cks2/Sgo1/Zfp318/Myh9/Smc3/Plcb1/Ehmt2/Fbxo5/Eme1	53
BP	GO:0002504	antigen processing and presentation of peptide or polysaccharide antigen via MHC class II	9/2387	22/21092	0.000375539	0.00703946	0.00556153	H2-Ob/H2-DMb1/H2-Ab1/Ctse/Traf6/March1/Fcgr2b/H2-Aa/Cd74	9
BP	GO:0051235	maintenance of location	56/2387	314/21092	0.000376372	0.00703946	0.00556153	Lpl/Ptpn6/Golph3/Lck/Bard1/Pkd1/Nr1h2/Morc3/Mprip/Xcr1/Flna/F2rl3/Srebf2/Cxcr3/Pparg/Fbn1/Myo5a/Dgat1/Ednra/Cd19/Trdn/Gpsm2/Ltbp1/Ywhab/Htr2c/Tmem135/Ptprc/Tacc3/Pip5k1c/Ikbke/Hnrnpu/Hnrnpu/Ffar2/Gopc/Twf2/Dysf/Plin2/Aspm/Nrros/Pml/Epb41l3/Insig1/Cherp/Soat1/Sun2/4932438A13Rik/Syne2/Ccr5/Coro1a/Pfn1/Abl1/Ehd1/Ehd1/Taf3/Mest/Camk2d	56
BP	GO:0010952	positive regulation of peptidase activity	34/2387	165/21092	0.000377662	0.00704137	0.00556304	Lck/Stat1/Gramd4/Ctsh/Ifi27/Tnfsf10/Antxr1/Nlrp1a/Nlrp1a/Nlrp1a/Nlrp1a/Pparg/Map3k5/Ppp2ca/Dlc1/Arrb1/Casp8ap2/Psme1/Tnfsf15/Acer2/Hip1/Fas/Usp50/Epha4/Mapk14/Htra2/Pml/Tbc1d10a/Senp1/Men1/Men1/Pidd1/Rhoa/Aim2	34
BP	GO:0043547	positive regulation of GTPase activity	42/2387	218/21092	0.000384972	0.00713391	0.00563615	Tbc1d30/Ect2/Tbc1d20/F11r/Gnas/Arap1/Eif5/Chn2/Sh3bp1/Cav2/Ccl6/Rap1gds1/Agrn/Pkp4/Tbc1d10b/Rabgap1/Rgs10/Wnt11/Tbck/Ccl8/Dock10/Dock7/Afdn/Rgma/Arhgap24/Tbc1d10a/Arhgap42/Sipa1l1/Tbc1d17/Ccl4/Tiam1/Rab3gap1/Rgl3/Map4k4/Dock11/Dvl2/Sec13/Rapgef3/Sema4d/Rapgef6/Ezh2/Icam1	42
BP	GO:0000723	telomere maintenance	28/2387	127/21092	0.000385031	0.00713391	0.00563615	Ccne2/Ccne1/Rad51/Rpa1/Terf1/Hnrnpc/Mcrs1/Smc5/Gnl3/Dclre1a/Blm/Dna2/Terf2ip/Smc6/Brca2/Hnrnpu/Hnrnpu/Parp3/Cct2/Pml/Smg1/Atrx/Tinf2/Atr/Aurkb/Tcp1/Sirt6/Hdac8	28
BP	GO:0044270	cellular nitrogen compound catabolic process	74/2387	443/21092	0.000386632	0.00714126	0.00564195	Dhx9/Pkm/Cnot7/Slfn8/Slfn8/Slfn8/Cnot8/Igfbp3/Sidt2/Zbtb20/Lrpprc/Zc3h12d/Pfkp/Hnrnpc/Pnp/Entpd3/Pnpt1/Fen1/Pfkfb2/Hnrnpr/Snd1/Helz2/Thrap3/Insr/Pan3/Nanos1/Dnase2a/Khsrp/Blvrb/Por/Slfn14/Slfn14/Slfn14/Slfn14/Dhx34/Gen1/Dna2/Prkaa1/Eif6/Khk/Tet2/Gck/Ncor1/Rbm38/Nt5e/Rnaseh2c/Hnrnpu/Hnrnpu/Ddx5/E2f1/Pum1/Pum1/Zc3h14/Tnrc6c/Pde5a/Ago1/Smg1/Mettl3/Dffb/Ddit4/Edc4/Eno4/Pabpc1/Hmox2/Mus81/Mgat1/Rnaseh…	74
BP	GO:0000076	DNA replication checkpoint	7/2387	14/21092	0.000392563	0.00718366	0.00567546	Ticrr/Timeless/Dna2/Orc1/Cdc6/Cdt1/Rad17	7
BP	GO:0043650	dicarboxylic acid biosynthetic process	7/2387	14/21092	0.000392563	0.00718366	0.00567546	Got1/Mthfd1/Mthfd1l/Gls/Haao/Kynu/Kmo	7
BP	GO:0051315	attachment of mitotic spindle microtubules to kinetochore	7/2387	14/21092	0.000392563	0.00718366	0.00567546	Kif2c/Hnrnpu/Hnrnpu/Cenpc1/Ndc80/Cenpe/Cdt1	7
BP	GO:0055074	calcium ion homeostasis	79/2387	480/21092	0.000400282	0.00730238	0.00576925	Npy1r/Ptpn6/Dlg4/Gnas/Lck/Got1/Kctd17/Atp2a3/Adm/Pkd1/Agt/Xcr1/Rap1gds1/Bdkrb2/F2rl3/Jak3/Cxcr5/Cxcr3/Prkcb/Prnp/Atp2c1/Tmtc2/Fxyd1/Ackr4/Ptgfr/Smdt1/Pla2g1b/Myo5a/P2ry10/Ednra/Cav3/Trpv6/Cd19/Gtf2i/Trdn/Scn5a/Cacnb3/Htr2c/Atp1b1/Sgcd/Ptprc/Gck/Ccrl2/Eif5a/Akap5/Hoxa3/Psen2/Slc35g1/Immt/Ager/Psen1/Adra1b/Atp2c2/Gpr33/Ccr2/Pml/Cherp/Maip1/Cln3/Sppl3/Cacna1c/Ptger1/Atf4/Ccr5/Synpo/Coro1a/Atp2b1/Hrc…	79
BP	GO:0002757	immune response-activating signal transduction	54/2387	301/21092	0.00040869	0.00743289	0.00587236	Stap1/Ptpn6/Lck/Ube2n/Gata3/Nfkbiz/Fyb/Mef2c/Plekha1/Cd300lf/Klrk1/Prkcb/Prnp/Nckap1l/Nfatc2/Rc3h2/Tlr11/Ankrd17/Cyld/Tlr3/Cd19/Cacnb3/Myo1g/Traf6/Rbck1/Peli3/Ticam1/Ptprc/Fcgr2b/Wnk1/Ticam2/Psen2/Prkch/Ffar2/Psen1/Dab2ip/Pum1/Pum1/Gpr33/Tlr8/Tlr7/Sppl3/Syk/Malt1/Traf3/Abl1/Irf4/Gcsam/Tlr9/Rps6ka3/Zc3hav1/C5ar1/Blk/Cd79a	54
BP	GO:1905037	autophagosome organization	23/2387	97/21092	0.000418236	0.00758325	0.00599115	Smurf1/Atg12/Ulk2/Chmp4b/Gabarap/Atg2a/Atg2a/Nprl3/Lrsam1/Map1lc3b/Ulk1/Irgm1/Irgm1/Irgm1/Psen1/Atg16l1/Scfd1/Rab3gap1/Emc6/Vmp1/Gba/Ehmt2/Atg7	23
BP	GO:0046635	positive regulation of alpha-beta T cell activation	18/2387	68/21092	0.000421537	0.00758621	0.00599349	Nfkbiz/Pnp/Sash3/Myb/Nckap1l/Blm/H2-Ab1/Ptprc/Runx1/Zbtb16/Ccr2/Syk/Malt1/Il12a/Il2rg/H2-T23/Ap3b1/Rhoa	18
BP	GO:1901224	positive regulation of NIK/NF-kappaB signaling	18/2387	68/21092	0.000421537	0.00758621	0.00599349	Eda/Agt/Traf4/Rc3h2/Chil1/Tlr3/Traf6/Rbck1/Tnfsf15/Terf2ip/Ptp4a3/Egfr/Ager/Il18r1/Ago1/Tlr7/Malt1/Tlr9	18
BP	GO:0002253	activation of immune response	63/2387	365/21092	0.000422238	0.00758621	0.00599349	Stap1/Ptpn6/Lck/Ube2n/C4b/Gata3/Nfkbiz/Fyb/Mef2c/Plekha1/Cd300lf/Klrk1/A2m/Prkcb/Prnp/Nckap1l/Nfatc2/Rc3h2/Tlr11/Ankrd17/Cfb/Cyld/Tlr3/Cd19/Cacnb3/Myo1g/Traf6/Rbck1/Peli3/Ticam1/Ptprc/Fcgr2b/Wnk1/Ticam2/Psen2/Prkch/Mbl1/Ffar2/Psen1/Dab2ip/Pum1/Pum1/Gpr33/Serping1/Pqbp1/Tlr8/Tlr7/Sin3a/Sppl3/Syk/Malt1/Traf3/Abl1/Irf4/Gcsam/Tlr9/Rps6ka3/Zc3hav1/C5ar1/Cfd/Blk/Cd79a/Aim2	63
BP	GO:0002456	T cell mediated immunity	28/2387	128/21092	0.000440501	0.00789042	0.00623383	Lyst/Tsta3/Gata3/Pnp/Ctsh/Kdm5d/Sash3/Cd1d2/Il20rb/Gzmb/Myo1g/H2-Q7/Tap2/Traf6/Ptprc/H60c/Ager/Pvr/Il18r1/Slamf1/Prf1/Malt1/Il12a/H2-T23/Ulbp1/Ulbp1/Rab27a/Icam1	28
BP	GO:0032872	regulation of stress-activated MAPK cascade	44/2387	233/21092	0.000444943	0.00794599	0.00627773	Dab2/Pak1/Spag9/Map4k1/Traf4/Dtnbp1/Map3k5/Prdx1/Foxm1/Eda2r/Map3k20/Ptpn1/Cyld/Tnfrsf11a/Tlr3/Rassf2/Cav3/Vangl2/Traf6/Lmnb1/Fcgr2b/Ncor1/Fas/Qars/Egfr/Ager/Fgd2/Dab2ip/Epha4/Slamf1/Ern1/Zmynd11/Prmt1/Syk/Tiam1/Map4k4/Mlkl/Men1/Men1/Tlr9/Dvl2/Mid1/Plcb1/Map3k10	44
BP	GO:0010971	positive regulation of G2/M transition of mitotic cell cycle	10/2387	27/21092	0.000461827	0.00822274	0.00649638	Ccnb1/Ccnd1/Dtl/Lmnb1/Wnt10b/Cdk4/Sin3a/Cdk1/Cdc25c/Fbxo5	10
BP	GO:1901653	cellular response to peptide	49/2387	268/21092	0.000475025	0.00843241	0.00666203	Ptk2/Pkm/Eif4ebp1/Pak1/Nfkb1/Cacnb1/Stat1/Pdk4/Nr4a2/Prkcd/Cav2/Timeless/Prkcb/Mbd5/Prnp/Pparg/Gsk3a/Nck1/Insr/Pla2g1b/Myo5a/Ptpn1/Grb14/Lpin3/Srebf1/Pxn/Ddx11/Ptpra/Fcgr2b/Gck/Lpin2/Rhoq/Ager/Psen1/Epha4/Trib3/Cdk4/Ccnd3/Uchl3/Pdk2/Grb2/Ywhag/Stxbp4/Socs2/Slc26a6/Slc26a6/Esrra/Cfl1/Plcb1	49
BP	GO:0046632	alpha-beta T cell differentiation	25/2387	110/21092	0.000478123	0.00846207	0.00668546	Gata3/Nfkbiz/Pnp/Prdm1/Sash3/Jak3/Myb/Nckap1l/Rc3h2/Satb1/Blm/Runx1/Ncor1/Rpl22/Zbtb16/Il18r1/Ccr2/Syk/Malt1/Il2rg/Abl1/Irf4/Bcl6/Ap3b1/Rhoa	25
BP	GO:0070664	negative regulation of leukocyte proliferation	22/2387	92/21092	0.000487823	0.00860805	0.0068008	Cd44/Ptpn6/Slfn1/Slfn1/Slfn1/Slfn1/Casp3/Zc3h12d/Arg2/Prdm1/Btla/Prnp/Il20rb/H2-Ab1/Sox11/Fcgr2b/Tmem131l/Tnfrsf13b/Pde5a/H2-Aa/Twsg1/Glmn	22
BP	GO:0032200	telomere organization	28/2387	129/21092	0.000502888	0.00884755	0.00699001	Ccne2/Ccne1/Rad51/Rpa1/Terf1/Hnrnpc/Mcrs1/Smc5/Gnl3/Dclre1a/Blm/Dna2/Terf2ip/Smc6/Brca2/Hnrnpu/Hnrnpu/Parp3/Cct2/Pml/Smg1/Atrx/Tinf2/Atr/Aurkb/Tcp1/Sirt6/Hdac8	28
BP	GO:0050730	regulation of peptidyl-tyrosine phosphorylation	47/2387	255/21092	0.000509943	0.00893356	0.00705797	Cd44/Stap1/Ptpn6/Dlg4/Bank1/Cnot7/Lck/Aplp2/Prkcd/Agt/Cav2/Mvp/Prnp/Agrn/Clcf1/Clcf1/Hyal2/Ptpn1/Sh3bp5/Ctnnd1/Ctnnd1/Ncapg2/Cd81/Fgfr3/Ptprc/Psen2/Egfr/Psen1/Epha4/Pibf1/Rictor/Errfi1/Inpp5f/Vegfb/Cass4/Itgb2/Syk/Il12a/Cd74/Abl1/Dvl2/Nf2/Prmt2/Sema4d/Icam1/Pecam1/Pdgfrb	47
BP	GO:0048146	positive regulation of fibroblast proliferation	18/2387	69/21092	0.000510791	0.00893356	0.00705797	Dhx9/Agt/Fn1/Ccnb1/Cdkn1a/Pla2g1b/Ccna2/Egfr/Ager/Fbrs/E2f1/Cdk4/Pml/Wnt2/Cd74/Sirt6/Cdc6/Pdgfrb	18
BP	GO:0048873	homeostasis of number of cells within a tissue	13/2387	42/21092	0.000518438	0.00904065	0.00714257	Tex15/Rpa1/Col14a1/Csf1/Sash3/Kras/Ildr2/Il20rb/Flt3/Rac1/Ccr2/Add1/Coro1a	13
BP	GO:0070302	regulation of stress-activated protein kinase signaling cascade	44/2387	235/21092	0.000537132	0.00933917	0.00737842	Dab2/Pak1/Spag9/Map4k1/Traf4/Dtnbp1/Map3k5/Prdx1/Foxm1/Eda2r/Map3k20/Ptpn1/Cyld/Tnfrsf11a/Tlr3/Rassf2/Cav3/Vangl2/Traf6/Lmnb1/Fcgr2b/Ncor1/Fas/Qars/Egfr/Ager/Fgd2/Dab2ip/Epha4/Slamf1/Ern1/Zmynd11/Prmt1/Syk/Tiam1/Map4k4/Mlkl/Men1/Men1/Tlr9/Dvl2/Mid1/Plcb1/Map3k10	44
BP	GO:0042110	T cell activation	79/2387	485/21092	0.000550662	0.00954641	0.00754215	Cd44/Icos/Ptpn6/Slfn1/Slfn1/Slfn1/Slfn1/Lck/Casp3/Cd151/Zc3h12d/Arg2/Gata3/Nfkbiz/Pnp/Ctla2a/Prdm1/Sash3/Jak3/Myb/Btla/Prnp/Nckap1l/Bcl11a/Rc3h2/Nck1/Tnfrsf13c/Satb1/Il20rb/Cyld/Blm/H2-Ab1/Traf6/Flt3/Nedd4/Ptprc/Runx1/Ncor1/Fas/Tmem131l/Psen2/Tnfrsf4/Rpl22/Fanca/Ager/Psen1/Tnfsf13b/Zbtb16/Il18r1/Slamf1/Ccr2/Fancd2/Pde5a/Ccnd3/Cyp26b1/Slc4a1/Mettl3/Efnb1/Itgb2/Syk/Malt1/Ncaph2/Coro1a/H2-Aa/Il12a/C…	79
BP	GO:0032727	positive regulation of interferon-alpha production	9/2387	23/21092	0.000555322	0.00959914	0.00758381	Dhx9/Chuk/Stat1/Tlr3/Flt3/Tlr8/Tlr7/Tlr9/Zc3hav1	9
BP	GO:0002449	lymphocyte mediated immunity	50/2387	277/21092	0.000567245	0.00971302	0.00767378	Ptpn6/Lyst/Tsta3/Prkcd/C4b/Gata3/Pnp/Klrb1b/Ctsh/Kdm5d/Nsd2/Sash3/Klrk1/Cd1d2/Clcf1/Clcf1/Prdx1/Klrb1c/Il20rb/Gzmb/H2-Ab1/Myo1g/H2-Q7/Tap2/Traf6/Ptprc/Fcer2a/Fcgr2b/H60c/Trp53bp1/Fas/Mbl1/Ager/Pvr/Il18r1/Klrd1/Slamf1/Serping1/Prf1/Malt1/Coro1a/Il12a/Cd74/Bcl6/H2-T23/Ulbp1/Ulbp1/Fcgr3/Rab27a/Icam1	50
BP	GO:1903008	organelle disassembly	21/2387	87/21092	0.000567934	0.00971302	0.00767378	Clec16a/Smurf1/Atg12/Gabarap/Stx5a/Atg2a/Atg2a/Gsk3a/Spast/Map1lc3b/Srebf1/Usp30/Ulk1/Sqstm1/Hdac6/Htra2/Atpif1/Cdk1/Fbxo7/Gba/Atg7	21
BP	GO:0038061	NIK/NF-kappaB signaling	23/2387	99/21092	0.000569684	0.00971302	0.00767378	Chuk/Eda/Agt/Traf4/Prdx1/Rc3h2/Chil1/Cyld/Tlr3/Rassf2/Traf6/Rbck1/Nfkb2/Tnfsf15/Terf2ip/Ptp4a3/Egfr/Ager/Il18r1/Ago1/Tlr7/Malt1/Tlr9	23
BP	GO:0110020	regulation of actomyosin structure organization	23/2387	99/21092	0.000569684	0.00971302	0.00767378	Ect2/Pak1/Ttc8/Arap1/Mef2c/Ppp1r9a/Akap13/Tacstd2/Dlc1/Alms1/Cav3/Wnt11/Pxn/Rac1/Tpm1/Phldb2/Synpo/Pfn1/Carmil1/Abl1/Rapgef3/Rhoa/Nf2	23
BP	GO:0000045	autophagosome assembly	22/2387	93/21092	0.00057174	0.00971302	0.00767378	Smurf1/Atg12/Ulk2/Chmp4b/Gabarap/Atg2a/Atg2a/Nprl3/Lrsam1/Map1lc3b/Ulk1/Irgm1/Irgm1/Irgm1/Psen1/Atg16l1/Scfd1/Rab3gap1/Emc6/Vmp1/Ehmt2/Atg7	22
BP	GO:0061640	cytoskeleton-dependent cytokinesis	22/2387	93/21092	0.00057174	0.00971302	0.00767378	Kif23/Ect2/Sept10/Nusap1/Plk1/Racgap1/Anln/Chmp4b/Cit/Kif4/Spast/Cenpa/Brca2/Ckap2/Sept8/Birc5/Sept3/Aurkb/Cfl1/Rhoa/Kif20b/Cdt1	22
BP	GO:0002228	natural killer cell mediated immunity	17/2387	64/21092	0.000577373	0.00978069	0.00772724	Ptpn6/Lyst/Klrb1b/Klrk1/Prdx1/Klrb1c/Gzmb/Tap2/H60c/Pvr/Klrd1/Coro1a/Il12a/H2-T23/Ulbp1/Ulbp1/Rab27a	17
BP	GO:0031529	ruffle organization	15/2387	53/21092	0.000579156	0.00978295	0.00772903	Stap1/Sh3bp1/Plekha1/Tacstd2/Wdpcp/Rac1/Tpm1/Arhgap24/Palld/Arhgef26/Pfn1/Carmil1/Eps8l2/Icam1/Sh3yl1	15
BP	GO:2000105	positive regulation of DNA-dependent DNA replication	6/2387	11/21092	0.000581591	0.00979618	0.00773948	E2f8/Wiz/Ino80/Atrx/E2f7/Cdt1	6
BP	GO:0016482	cytosolic transport	30/2387	143/21092	0.00059268	0.00992656	0.00784248	Dab2/Spag9/Vps52/Dctn1/Flna/Stx5a/Bet1l/Rab14/Snf8/Hook1/Tbc1d10b/Stx16/Map2/Ube2o/Kif1a/Pqlc1/Heatr5a/Hook3/Tbc1d10a/Kif1b/Wdr81/Mtmr2/Tbc1d17/Rab6b/Coro1a/Sort1/Ykt6/Stx8/Baiap3/Syt7	30
BP	GO:0046330	positive regulation of JNK cascade	30/2387	143/21092	0.00059268	0.00992656	0.00784248	Dab2/Pak1/Spag9/Map4k1/Traf4/Map3k5/Eda2r/Map3k20/Ptpn1/Tnfrsf11a/Tlr3/Rassf2/Vangl2/Traf6/Lmnb1/Fcgr2b/Ager/Fgd2/Dab2ip/Epha4/Slamf1/Ern1/Syk/Tiam1/Map4k4/Mlkl/Tlr9/Dvl2/Plcb1/Map3k10	30
BP	GO:0001819	positive regulation of cytokine production	72/2387	435/21092	0.000600042	0.0100215	0.00791753	Lpl/Dhx9/Cybb/Chuk/Stat1/Zbtb20/Agt/Brca1/Gata3/Ncl/Sash3/Klrk1/Polr3f/Nlrp1a/Nlrp1a/Nlrp1a/Nlrp1a/Clec9a/Tnfrsf13c/Hyal2/Ankrd17/Il20rb/Il33/Tlr3/Wnt11/H2-Q7/Traf6/Flt3/Polr3c/Ticam1/Ptprc/Runx1/Tnfsf15/Ticam2/Spon2/Usp50/Ffar2/Ager/Pibf1/Mapk14/Pum1/Pum1/Il18r1/Postn/Slamf1/Ccr2/Pqbp1/Gbp5/Tlr8/Tlr7/Mcoln2/Ccl4/Sulf1/Syk/Malt1/Atf4/Ccr5/Il12a/Cd74/Abl1/Irf4/Tlr9/H2-T23/Zc3hav1/Ulbp1/Ulbp1/Glmn/…	72
BP	GO:0034655	nucleobase-containing compound catabolic process	68/2387	406/21092	0.000604524	0.010068	0.00795427	Dhx9/Pkm/Cnot7/Slfn8/Slfn8/Slfn8/Cnot8/Igfbp3/Sidt2/Zbtb20/Lrpprc/Zc3h12d/Pfkp/Hnrnpc/Pnp/Entpd3/Pnpt1/Fen1/Pfkfb2/Hnrnpr/Snd1/Helz2/Thrap3/Insr/Pan3/Nanos1/Dnase2a/Khsrp/Slfn14/Slfn14/Slfn14/Slfn14/Dhx34/Gen1/Dna2/Prkaa1/Eif6/Khk/Gck/Ncor1/Rbm38/Nt5e/Rnaseh2c/Hnrnpu/Hnrnpu/Ddx5/E2f1/Pum1/Pum1/Zc3h14/Tnrc6c/Pde5a/Ago1/Smg1/Mettl3/Dffb/Ddit4/Edc4/Eno4/Pabpc1/Mus81/Mgat1/Rnaseh2a/Sirt6/Zc3hav1/Upp1…	68
BP	GO:0046328	regulation of JNK cascade	37/2387	189/21092	0.000606277	0.010069	0.00795499	Dab2/Pak1/Spag9/Map4k1/Traf4/Dtnbp1/Map3k5/Eda2r/Map3k20/Ptpn1/Cyld/Tnfrsf11a/Tlr3/Rassf2/Vangl2/Traf6/Lmnb1/Fcgr2b/Ncor1/Egfr/Ager/Fgd2/Dab2ip/Epha4/Slamf1/Ern1/Zmynd11/Syk/Tiam1/Map4k4/Mlkl/Men1/Men1/Tlr9/Dvl2/Plcb1/Map3k10	37
BP	GO:0110053	regulation of actin filament organization	47/2387	257/21092	0.000608819	0.0100829	0.00796603	Eln/Rhobtb1/Pak1/Ttc8/Arap1/Prkcd/Baiap2/Flna/Sh3bp1/Ppp1r9a/Cit/Nckap1l/Ssh3/Nck1/Tacstd2/Dlc1/Alms1/Tmod2/Wnt11/Pxn/Plekhg2/Shank1/Actr3b/Twf2/Rac1/Tpm1/Gmfg/Alox15/Gmfb/Rictor/Capg/Grb2/Phldb2/Add1/Synpo/Coro1a/Pfn1/Carmil1/Slit2/Abl1/Cfl1/Rapgef3/Rhoa/Nf2/Cdc42ep4/Icam1/Pecam1	47
BP	GO:0007018	microtubule-based movement	48/2387	264/21092	0.00061275	0.0101	0.00797955	Kif23/Ift43/Dynlrb1/Kif11/Kif11/Spg7/Kif2c/Dctn1/Map4/Kifc3/Kif3a/Stard9/Stk36/Madd/Kif4/Dtnbp1/Kif18a/Kif15/Spast/Dnah9/Cfap53/Stau2/Kif24/Myo5a/Map2/Snapin/Kif1a/Kif21b/Ccdc103/Hnrnpu/Hnrnpu/Kif18b/Kifc1/Kif1b/Kif22/Sun2/Cln3/Dnah8/Nme7/Syne2/Map6/Nde1/Ap3b1/Copg2/Kif20b/Map1a/Cenpe/Camsap3	48
BP	GO:0050708	regulation of protein secretion	77/2387	472/21092	0.000613768	0.0101	0.00797955	Lpl/Dhx9/Bank1/Golph3/Chuk/Glul/Sidt2/Nr1h2/Agt/Arg2/Gata3/Fn1/Ncl/Pfkfb2/Rhbdf1/Madd/Nlrp1a/Nlrp1a/Nlrp1a/Nlrp1a/Clec9a/Exoc1/Ang/Pde8b/Il1r2/Arrb1/Nrxn1/Hyal2/Zfp384/Il33/Oit1/Srebf1/Cacna1d/Traf6/Flt3/Siglecg/Doc2b/Gck/Tnfsf15/Arntl/Oxct1/Myrip/Usp50/Hmgn3/Mmp13/Tnfrsf4/Ano1/Egfr/Ffar2/Ucp2/Mapk14/Postn/Slamf1/Pml/Pde4c/Pde4c/Sirt3/Tlr8/Stxbp4/Rab11fip1/Syk/Tiam1/Map4k4/Ccr5/Birc5/Baiap3/Abl1/…	77
BP	GO:0007015	actin filament organization	67/2387	399/21092	0.000614963	0.0101	0.00797955	Eln/Rhobtb1/Pak1/Ttc8/Arap1/Prkcd/Cap1/Baiap2/Flna/Sh3bp1/Ppp1r9a/Cit/Nckap1l/Ssh3/Nck1/Tacstd2/Fam107a/Dlc1/Akap2/Arrb1/Diaph3/Alms1/Cav3/Sorbs2/Tmod2/Wnt11/Pxn/Rflnb/Ttc17/Plekhg2/Shank1/Fat1/Gdpd2/Actr3b/Hip1/Washc3/Rhoq/Twf2/Rac1/Tpm1/Gmfg/Alox15/Gmfb/Rufy3/Rictor/Capg/Pls3/Grb2/Cass4/Phldb2/Add1/Coro7/Synpo/Coro1a/Pfn1/Carmil1/Slit2/Abl1/Cfl1/Rapgef3/Rhoa/Nf2/Cdc42ep4/Zyx/Icam1/Pecam1/Arhgap…	67
BP	GO:0002768	immune response-regulating cell surface receptor signaling pathway	38/2387	196/21092	0.000626608	0.0102234	0.00807703	Stap1/Ptpn6/Lck/Ube2n/Gata3/Nfkbiz/Fyb/Mef2c/Plekha1/Klrk1/Btla/Prkcb/Prnp/Nckap1l/Nfatc2/Rc3h2/Cyld/Cd19/Cacnb3/Myo1g/Traf6/Rbck1/Ptprc/Fcgr2b/Wnk1/Psen2/Prkch/Ffar2/Psen1/Gpr33/Sppl3/Syk/Malt1/Abl1/Gcsam/C5ar1/Blk/Cd79a	38
BP	GO:1903039	positive regulation of leukocyte cell-cell adhesion	38/2387	196/21092	0.000626608	0.0102234	0.00807703	Cd44/Icos/Lck/Gata3/Nfkbiz/Pnp/Sash3/Jak3/Myb/Nckap1l/Nck1/Tnfrsf13c/Ets1/Cyld/Blm/H2-Ab1/Traf6/Ptprc/Runx1/Ager/Tnfsf13b/Zbtb16/Slamf1/Ccr2/Slc4a1/Efnb1/Syk/Malt1/Coro1a/H2-Aa/Il12a/Cd74/Il2rg/Bcl6/H2-T23/Ap3b1/Rhoa/Icam1	38
BP	GO:0061014	positive regulation of mRNA catabolic process	14/2387	48/21092	0.000627649	0.0102234	0.00807703	Cnot7/Cnot8/Zc3h12d/Pnpt1/Hnrnpr/Nanos1/Khsrp/Pum1/Pum1/Tnrc6c/Mettl3/Pabpc1/Zc3hav1/Zfp36	14
BP	GO:0031571	mitotic G1 DNA damage checkpoint	8/2387	19/21092	0.000634838	0.010284	0.0081249	Rfwd3/Ccnd1/Cdkn1a/Dgkz/Rbm38/Pml/Fbxo31/Pidd1	8
BP	GO:2000104	negative regulation of DNA-dependent DNA replication	8/2387	19/21092	0.000634838	0.010284	0.0081249	Lig3/Msh3/Timeless/Chek2/Brca2/Smc3/Fbxo5/Atg7	8
BP	GO:0070198	protein localization to chromosome, telomeric region	10/2387	28/21092	0.000646065	0.0104374	0.00824606	Terf1/Gnl3/Terf2ip/Brca2/Cct2/Pml/Atrx/Tinf2/Atr/Tcp1	10
BP	GO:1905269	positive regulation of chromatin organization	24/2387	106/21092	0.000650689	0.0104835	0.00828251	Wdr61/Ube2n/Brca1/Gata3/Ccnb1/Myb/Dnmt1/Arrb1/Phf19/Paxbp1/Srebf1/Rnf20/Cdk9/Ncor1/Snw1/Pml/Kdm2a/Sin3a/Hist1h1b/Men1/Men1/Bcl6/Sirt6/BC004004	24
BP	GO:0042176	regulation of protein catabolic process	63/2387	371/21092	0.000654554	0.0105043	0.00829893	Dab2/Ptk2/Nsf/Clec16a/Smurf1/Chfr/Rchy1/Arih1/Plk1/Pkd1/Ubqln4/Atraid/Flna/Rhbdf1/Stx5a/Gsk3a/Csnk1e/Snf8/Ppp2ca/Fam83d/Il33/Dtl/Timp3/Aurka/Usp14/Fam192a/Csnk1a1/Sf3b3/Dnajb2/Sh3d19/Psme1/Nedd4/Cd81/Chek2/Wnt10b/Arntl/Psen2/Egfr/Psen1/Dab2ip/Psmd14/Dysf/Epha4/Trib3/Trib1/Sumo3/Rgma/Pml/Senp1/Ldlr/Usp13/Tmem67/Atpif1/Rnf144b/Trim67/Tlk2/Commd1/Glmn/Gba/Cbfa2t3/Map1a/Atg7/Mdm4	63
BP	GO:0010457	centriole-centriole cohesion	7/2387	15/21092	0.000664273	0.0105043	0.00829893	Dctn1/Kif3a/Cntln/Syne2/Sgo1/Nin/Cep68	7
BP	GO:0019886	antigen processing and presentation of exogenous peptide antigen via MHC class II	7/2387	15/21092	0.000664273	0.0105043	0.00829893	H2-DMb1/H2-Ab1/Ctse/Traf6/Fcgr2b/H2-Aa/Cd74	7
BP	GO:0051974	negative regulation of telomerase activity	7/2387	15/21092	0.000664273	0.0105043	0.00829893	Terf1/Mcrs1/Pparg/Parp3/Pml/Men1/Men1	7
BP	GO:0071404	cellular response to low-density lipoprotein particle stimulus	7/2387	15/21092	0.000664273	0.0105043	0.00829893	Lpl/Pparg/Cd81/Cd9/Ldlr/Itgb2/Syk	7
BP	GO:0044786	cell cycle DNA replication	13/2387	43/21092	0.000666934	0.0105043	0.00829893	Rad51/E2f8/Wiz/Orc3/Dna2/Chek2/Ino80/Brca2/Atrx/E2f7/Smc3/Cdt1/Fbxo5	13
BP	GO:1902808	positive regulation of cell cycle G1/S phase transition	13/2387	43/21092	0.000666934	0.0105043	0.00829893	Ccnd1/Fam83d/Mtbp/Ankrd17/Cyp1a1/Ube2e2/Hyal1/Ccnd3/Stxbp4/Larp7/Plcb1/Ezh2/Dbf4	13
BP	GO:0097061	dendritic spine organization	21/2387	88/21092	0.000667628	0.0105043	0.00829893	Dlg4/Baiap2/Ppp1r9a/Ephb3/Prnp/Dtnbp1/Itga3/Stau2/Insr/Eef2k/Dock10/Shank1/Fcgr2b/Hdac6/Epha4/Mtmr2/Sipa1l1/Tiam1/Dnm3/Tanc1/Cfl1	21
BP	GO:0043506	regulation of JUN kinase activity	22/2387	94/21092	0.000667924	0.0105043	0.00829893	Dab2/Pak1/Spag9/Map4k1/Dtnbp1/Map3k5/Map3k20/Ptpn1/Tnfrsf11a/Vangl2/Traf6/Ager/Fgd2/Dab2ip/Epha4/Ern1/Syk/Tiam1/Mlkl/Tlr9/Dvl2/Map3k10	22
BP	GO:0045577	regulation of B cell differentiation	11/2387	33/21092	0.00068683	0.0107731	0.00851126	Ptpn6/Pnp/Prdm1/Nckap1l/Cyld/Flt3/Ptprc/Ikzf3/Syk/Il2rg/Tlr9	11
BP	GO:0050673	epithelial cell proliferation	69/2387	416/21092	0.000726776	0.0113695	0.00898251	Dab2/Aldh1a2/Fst/Chuk/Tgm1/Igfbp3/Stat1/Glul/Sidt2/Notch2/Iqgap3/Gata3/Kif3a/Mef2c/Cav2/Egfl7/Cxcr3/Pparg/Ang/Ccnd1/Slurp1/Tacstd2/Alms1/Nfib/Bnc1/Mki67/Nme2/Ednra/Scn5a/Sox11/Strap/Fgfr3/Wnt10b/Klk8/Ecm1/Htra1/Brca2/Egfr/Fgfbp1/Ager/Psen1/Dab2ip/Dysf/Pex2/Ctsl/Hey1/Ern1/Rictor/Hyal1/Errfi1/Lims2/Vegfb/Stxbp4/Tinf2/Sulf1/Atpif1/Atp5a1/Atp5a1/Wnt2/Birc5/Wdr13/Men1/Men1/Sirt6/Kdr/C5ar1/BC004004/Zfp…	69
BP	GO:0021987	cerebral cortex development	24/2387	107/21092	0.000750343	0.0117073	0.00924938	Mcph1/Sema3a/Ccdc141/Col3a1/Tacc3/Pax5/Btbd3/Egfr/Psen1/Afdn/Wdr62/Dab2ip/Rac1/Gng12/Aspm/Cdon/Sun2/Lhx6/Syne2/Nde1/Slit2/Rhoa/Plcb1/Atg7	24
BP	GO:1903311	regulation of mRNA metabolic process	45/2387	246/21092	0.000780633	0.012148	0.00959751	Dhx9/Cnot7/Cnot8/Mbnl1/Rbm5/Zc3h12d/Hnrnpc/Srpk3/Pnpt1/Ccnb1/Hnrnpr/Thrap3/Nanos1/Khsrp/Rbm17/Srsf2/Rnf20/Nudt21/Dhx34/Cdk9/Rbm38/Srpk2/Hnrnpu/Hnrnpu/Ddx5/Hnrnpl/Fam172a/BC005624/Snw1/E2f1/Pum1/Pum1/Zc3h14/Tnrc6c/Mettl3/Sfswap/Pabpc1/Cpsf6/Rbm7/Srsf5/Snrnp70/Zc3hav1/Safb/Zfp36/Rbm25	45
BP	GO:0009267	cellular response to starvation	29/2387	139/21092	0.000795364	0.0123448	0.00975301	Clec16a/Atf3/Glul/Pdk4/Angptl4/Gabarap/Srebf2/Map3k5/Nprl3/Cdkn1a/Map1lc3b/Srebf1/Cadps2/Prkaa1/Klf10/Gck/Ulk1/Fas/Rnase4/Hnrnpl/Rnf152/Lamp2/Atf4/Zfyve1/Gba/Higd1a/Pik3r4/Ehmt2/Atg7	29
BP	GO:2000637	positive regulation of gene silencing by miRNA	9/2387	24/21092	0.000799876	0.0123824	0.00978273	Dhx9/Nfkb1/Wtip/Ajuba/Ddx5/Egfr/Pum1/Pum1/Zfp36	9
BP	GO:0042594	response to starvation	32/2387	159/21092	0.000843237	0.0130197	0.0102862	Clec16a/Eif4ebp1/Atf3/Glul/Pdk4/Ulk2/Angptl4/Gabarap/Srebf2/Map3k5/Nprl3/Cdkn1a/Map1lc3b/Srebf1/Cadps2/Prkaa1/Klf10/Gck/Ulk1/Fas/Rnase4/Hnrnpl/Rnf152/Lamp2/Atf4/Zfyve1/Gba/Higd1a/Pik3r4/Ehmt2/Zfp36/Atg7	32
BP	GO:0046777	protein autophosphorylation	44/2387	240/21092	0.000845923	0.0130272	0.0102922	Ptk2/Pak1/Lck/Srms/Ulk2/Clk4/Map4k1/Prkcd/Ephb3/Mvp/Ppp2ca/Insr/Clk1/Sla/Nme2/Rassf2/Melk/Eef2k/Ctnnd1/Ctnnd1/Flt3/Fgfr3/Ptprc/Chek2/Wnk1/Ulk1/Phka1/Egfr/Epha4/Mapk14/Mark2/Ern1/Camk2g/Errfi1/Smg1/Atr/Syk/Aak1/Ttk/Abl1/Kdr/Blk/Camk2d/Pdgfrb	44
BP	GO:0006310	DNA recombination	48/2387	268/21092	0.000860203	0.0132128	0.0104388	Lig3/Palb2/Rfwd3/Rad51/Trip13/Tex15/Rpa1/Aunip/Ube2n/Rad54l/Rad54b/Brca1/Cenpx/Mcrs1/Msh3/Top2a/Nsd2/Smc5/Parpbp/Rad51ap1/Hist1h1a/Clcf1/Clcf1/Blm/Mms19/Gen1/Ptprc/Terf2ip/Smc6/Trp53bp1/Ino80/Brca2/Tonsl/Psmd14/Ankle1/Polq/Fan1/Rmi2/Brip1/Hist1h1b/Mus81/Bcl6/Sirt6/Actl6a/Fign/Smarcad1/Nabp1/Eme1	48
BP	GO:0009206	purine ribonucleoside triphosphate biosynthetic process	27/2387	127/21092	0.000877792	0.0134481	0.0106247	Pkm/Nme6/Atp5k/Zbtb20/Pfkp/Pnp/Pfkfb2/Atp5g3/Surf1/Insr/Flcn/Nme2/Prkaa1/Eif6/Khk/Gck/Ncor1/Atp5j2/Atp5b/Nme7/Ddit4/Atp5a1/Atp5a1/Eno4/Impdh1/Sirt6/Cbfa2t3	27
BP	GO:0000018	regulation of DNA recombination	23/2387	102/21092	0.000885809	0.013536	0.0106941	Lig3/Rad51/Tex15/Msh3/Nsd2/Parpbp/Rad51ap1/Hist1h1a/Clcf1/Clcf1/Blm/Mms19/Ptprc/Terf2ip/Trp53bp1/Ankle1/Polq/Rmi2/Hist1h1b/Bcl6/Sirt6/Fign/Smarcad1	23
BP	GO:0010569	regulation of double-strand break repair via homologous recombination	12/2387	39/21092	0.000894952	0.0136056	0.0107491	Rad51/Tex15/Parpbp/Rad51ap1/Blm/Mms19/Terf2ip/Trp53bp1/Polq/Rmi2/Sirt6/Fign	12
BP	GO:0030866	cortical actin cytoskeleton organization	12/2387	39/21092	0.000894952	0.0136056	0.0107491	Kif23/Ect2/Racgap1/Anln/Epb41l1/Nckap1l/Epb41/Strip1/Rhoq/Ikbkb/Epb41l3/Fmnl2	12
BP	GO:0043502	regulation of muscle adaptation	22/2387	96/21092	0.00090303	0.0136876	0.0108139	Ptk2/Pak1/Mef2a/Agt/Col14a1/Mef2c/Fdps/Gsk3a/Trip10/Cav3/Gtf2i/Scn5a/Cdk9/Tead1/Gtf2ird1/Nfatc1/Pde5a/Errfi1/Rgs2/Wisp1/Gtf2ird2/Camk2d	22
BP	GO:0032479	regulation of type I interferon production	19/2387	78/21092	0.000904965	0.0136876	0.0108139	Dhx9/Chuk/Stat1/Zbtb20/Polr3f/Tlr3/Flt3/Peli3/Polr3c/Ticam1/Nmi/Pqbp1/Gbp4/Tlr8/Tlr7/Syk/Traf3/Tlr9/Zc3hav1	19
BP	GO:0051099	positive regulation of binding	39/2387	207/21092	0.000951521	0.0141407	0.0111719	Dhx9/Spon1/Nmd3/Pkd1/Gata3/Mef2c/Traf4/Pparg/Agrn/Ppp2ca/Epb41/Crbn/Arrb1/Map1lc3b/Traf6/Ddx11/Ticam1/Cdk9/Pon1/Hoxa3/Gpsm1/Eif3c/Hnrnpl/Psen1/Epha4/Trib3/Sppl3/Eif3d/Tiam1/Add1/Bdnf/Abl1/Irf4/Men1/Men1/Rapgef3/Cdca5/Cdt1/Hdac8	39
BP	GO:0042451	purine nucleoside biosynthetic process	8/2387	20/21092	0.000953672	0.0141407	0.0111719	Nme6/Guk1/Pnp/Nme2/Nt5e/Aprt/Nme7/Impdh1	8
BP	GO:0044783	G1 DNA damage checkpoint	8/2387	20/21092	0.000953672	0.0141407	0.0111719	Rfwd3/Ccnd1/Cdkn1a/Dgkz/Rbm38/Pml/Fbxo31/Pidd1	8
BP	GO:0044819	mitotic G1/S transition checkpoint	8/2387	20/21092	0.000953672	0.0141407	0.0111719	Rfwd3/Ccnd1/Cdkn1a/Dgkz/Rbm38/Pml/Fbxo31/Pidd1	8
BP	GO:0046129	purine ribonucleoside biosynthetic process	8/2387	20/21092	0.000953672	0.0141407	0.0111719	Nme6/Guk1/Pnp/Nme2/Nt5e/Aprt/Nme7/Impdh1	8
BP	GO:0098840	protein transport along microtubule	8/2387	20/21092	0.000953672	0.0141407	0.0111719	Kif3a/Stau2/Myo5a/Kif1a/Hnrnpu/Hnrnpu/Map1a/Camsap3	8
BP	GO:0099118	microtubule-based protein transport	8/2387	20/21092	0.000953672	0.0141407	0.0111719	Kif3a/Stau2/Myo5a/Kif1a/Hnrnpu/Hnrnpu/Map1a/Camsap3	8
BP	GO:1901361	organic cyclic compound catabolic process	79/2387	494/21092	0.000954003	0.0141407	0.0111719	Dhx9/Pkm/Cnot7/Slfn8/Slfn8/Slfn8/Cnot8/Moxd1/Igfbp3/Sidt2/Zbtb20/Lrpprc/Zc3h12d/Pfkp/Hnrnpc/Pnp/Entpd3/Pnpt1/Fen1/Pfkfb2/Acaa1a/Hnrnpr/Snd1/Helz2/Thrap3/Insr/Pan3/Nanos1/Dnase2a/Khsrp/Ugt1a7c/Blvrb/Cyp1a1/Slfn14/Slfn14/Slfn14/Slfn14/Dhx34/Gen1/Dna2/Hsd11b1/Prkaa1/Eif6/Khk/Tet2/Gck/Ncor1/Rbm38/Gsta3/Nt5e/Rnaseh2c/Hnrnpu/Hnrnpu/Ddx5/E2f1/Pum1/Pum1/Zc3h14/Tnrc6c/Pde5a/Ago1/Smg1/Mettl3/Dffb/Ddit4/Edc…	79
BP	GO:0051090	regulation of DNA-binding transcription factor activity	65/2387	391/21092	0.000959186	0.0141821	0.0112046	Dhx9/Chuk/Pkd1/Ube2n/Mid2/Kdm5a/Jup/Flna/Commd6/Trim21/Stk36/Arid5b/Prkcb/Kras/Prnp/Pparg/Lrrfip1/Arrb1/Cth/Eda2r/Pla2g1b/Cyld/Tnfrsf11a/Tlr3/Fank1/Cacna1d/Traf6/Rbck1/Ticam1/Fcgr2b/Wnt10b/Cib1/Terf2ip/Tacc3/Hmgn3/Prkch/Tnfrsf4/Fanca/Ager/Rlim/Dab2ip/Trib1/Il18r1/Ikbkb/Fancd2/Itgb2/Ifrd1/Syk/Malt1/Traf3/Wnt2/Bdnf/Commd1/Id3/Men1/Men1/Tlr9/Dvl2/Anxa4/Taf3/Prmt2/Ezh2/Aim2/Icam1/Map3k10	65
BP	GO:0032868	response to insulin	40/2387	214/21092	0.000967845	0.0142745	0.0112776	Pkm/Eif4ebp1/Pak1/Stat1/Pdk4/Prkcd/Cav2/Prkcb/Pparg/Gsk3a/Nck1/Insr/Pla2g1b/Myo5a/Ptpn1/Grb14/Lpin3/Srebf1/Ptpra/Eif6/Khk/Gck/Lpin2/Rhoq/Trib3/Cdk4/Ccnd3/Uchl3/Pdk2/Grb2/Ywhag/Stxbp4/Hadha/Socs2/Klf15/Sort1/Slc27a1/Esrra/Srsf5/Plcb1	40
BP	GO:0009145	purine nucleoside triphosphate biosynthetic process	27/2387	128/21092	0.000994692	0.0145978	0.011533	Pkm/Nme6/Atp5k/Zbtb20/Pfkp/Pnp/Pfkfb2/Atp5g3/Surf1/Insr/Flcn/Nme2/Prkaa1/Eif6/Khk/Gck/Ncor1/Atp5j2/Atp5b/Nme7/Ddit4/Atp5a1/Atp5a1/Eno4/Impdh1/Sirt6/Cbfa2t3	27
BP	GO:1903322	positive regulation of protein modification by small protein conjugation or removal	27/2387	128/21092	0.000994692	0.0145978	0.011533	Chfr/Rchy1/Plk1/Ube2n/Brca1/Rassf1/Gsk3a/Skp2/Skp2/Gnl3/Fam107a/Arrb1/Tollip/Dnajb2/Rnf20/Ticam1/Fgfr3/Cdk9/Fanci/Nhlrc1/Nmi/Trib3/Trib1/Mastl/Kdm2a/Cdc20/Commd1	27
BP	GO:2001056	positive regulation of cysteine-type endopeptidase activity	29/2387	141/21092	0.0010091	0.0147727	0.0116712	Lck/Stat1/Gramd4/Ifi27/Tnfsf10/Nlrp1a/Nlrp1a/Nlrp1a/Nlrp1a/Pparg/Map3k5/Ppp2ca/Dlc1/Arrb1/Casp8ap2/Tnfsf15/Acer2/Hip1/Fas/Usp50/Htra2/Pml/Tbc1d10a/Senp1/Men1/Men1/Pidd1/Rhoa/Aim2	29
BP	GO:0008380	RNA splicing	61/2387	363/21092	0.00103027	0.0150455	0.0118867	Dhx9/Zc3h13/Dhx8/Mbnl1/Rbm5/Clk4/Hnrnpc/Srpk3/Luc7l/Zcchc8/Syf2/Hnrnpll/Raly/Thrap3/Rnpc3/Rbm41/Clk1/Srrm2/Snrpe/Gemin8/Khsrp/Rp9/Rbm17/Puf60/Srsf2/Sf3b3/Rps13/Strap/Rbm38/Rbm39/Srpk2/U2af1l4/Hnrnpu/Hnrnpu/Ddx5/Hnrnpl/Fam172a/BC005624/Snw1/Luc7l3/Lsm8/Ern1/Pqbp1/Sf3b1/Mettl3/Prpf4b/Srrm1/Sfswap/Rbm28/Pnn/Pabpc1/Gemin6/Snrpb2/Rbm7/Srsf5/Snrnp70/Gcfc2/Thoc5/Snrpb/Psip1/Rbm25	61
BP	GO:0031058	positive regulation of histone modification	22/2387	97/21092	0.00104524	0.0152113	0.0120177	Wdr61/Ube2n/Brca1/Gata3/Ccnb1/Myb/Dnmt1/Arrb1/Phf19/Paxbp1/Srebf1/Rnf20/Cdk9/Ncor1/Snw1/Pml/Kdm2a/Hist1h1b/Men1/Men1/Bcl6/BC004004	22
BP	GO:0031060	regulation of histone methylation	18/2387	73/21092	0.0010496	0.0152113	0.0120177	Wdr61/Kdm4a/Brca1/Gata3/Myb/Dnmt1/Phf19/Paxbp1/Rnf20/Bcor/Pax5/Snw1/Atrx/Kdm4b/Hist1h1b/Men1/Men1/Ehmt2	18
BP	GO:0061097	regulation of protein tyrosine kinase activity	18/2387	73/21092	0.0010496	0.0152113	0.0120177	Stap1/Dlg4/Aplp2/Agt/Mvp/Prnp/Agrn/Hyal2/Ptpn1/Sh3bp5/Ncapg2/Ptprc/Psen2/Psen1/Epha4/Errfi1/Cass4/Dvl2	18
BP	GO:0097329	response to antimetabolite	6/2387	12/21092	0.00105189	0.0152113	0.0120177	Rad51/Timeless/Blm/Ddx11/Dhfr/Atrx	6
BP	GO:0010878	cholesterol storage	7/2387	16/21092	0.00106599	0.0153777	0.0121492	Lpl/Nr1h2/Srebf2/Pparg/Soat1/Ehd1/Ehd1	7
BP	GO:0022409	positive regulation of cell-cell adhesion	43/2387	236/21092	0.00109324	0.0157326	0.0124296	Cd44/Icos/Lck/Gata3/Nfkbiz/Pnp/Sash3/Jak3/Myb/Nckap1l/Nck1/Tnfrsf13c/Ets1/Cyld/Blm/H2-Ab1/Traf6/Ptprc/Runx1/Ager/Tnfsf13b/Afdn/Zbtb16/Adam19/Alox15/Slamf1/Ccr2/Slc4a1/Kif26b/Efnb1/Syk/Malt1/Ccr5/Coro1a/H2-Aa/Il12a/Cd74/Il2rg/Bcl6/H2-T23/Ap3b1/Rhoa/Icam1	43
BP	GO:0050851	antigen receptor-mediated signaling pathway	31/2387	155/21092	0.00112116	0.0160769	0.0127016	Stap1/Ptpn6/Lck/Ube2n/Gata3/Nfkbiz/Fyb/Mef2c/Plekha1/Prkcb/Prnp/Nckap1l/Nfatc2/Rc3h2/Cyld/Cd19/Cacnb3/Traf6/Rbck1/Ptprc/Wnk1/Psen2/Prkch/Psen1/Sppl3/Syk/Malt1/Abl1/Gcsam/Blk/Cd79a	31
BP	GO:0002478	antigen processing and presentation of exogenous peptide antigen	9/2387	25/21092	0.0011253	0.0160769	0.0127016	H2-DMb1/H2-Ab1/Ctse/Tap2/Traf6/Fcgr2b/H2-Aa/Cd74/Fcgr3	9
BP	GO:0060148	positive regulation of posttranscriptional gene silencing	9/2387	25/21092	0.0011253	0.0160769	0.0127016	Dhx9/Nfkb1/Wtip/Ajuba/Ddx5/Egfr/Pum1/Pum1/Zfp36	9
BP	GO:0034329	cell junction assembly	38/2387	202/21092	0.00112959	0.0160993	0.0127193	Pard3/Ect2/Ptk2/Agt/Jup/Fn1/Sh3bp1/Nphp1/Lsr/Cgn/Pkp4/Fam107a/Dlc1/Flcn/Wnt11/Pxn/Ctnnd1/Ctnnd1/Gnpat/Wdpcp/Lama3/Ajuba/Prkch/Afdn/Cd9/Rac1/Ikbkb/Epb41l3/Phldb2/Snai1/Map4k4/Gjc1/Vmp1/Abl1/Cfl1/Kdr/Rhoa/Camsap3	38
BP	GO:0006913	nucleocytoplasmic transport	54/2387	314/21092	0.00113731	0.0161318	0.0127449	Ect2/Dhx9/Ranbp2/Smurf1/Camk1/Nxt1/Nmd3/Bard1/Txnip/Pkd1/Prkcd/Agt/Jup/Brca1/Ipo5/Flna/Ipo9/Ifi27/Rpsa/Akap13/Ppp2ca/Ipo11/Cdkn1a/Hyal2/Zfp384/Poldip3/Nup85/Eif6/Nxt2/Cep57/Eif5a/Akap5/Nup54/Arntl/Ddx5/Psen1/Ipo8/Rae1/Mapk14/Pml/Nupl2/Ankle1/Gbp4/Syk/Malt1/Xpo7/Cdk1/Cpsf6/Kpna2/Ranbp17/Cfl1/Bcl6/Rapgef3/Thoc5	54
BP	GO:0051169	nuclear transport	54/2387	314/21092	0.00113731	0.0161318	0.0127449	Ect2/Dhx9/Ranbp2/Smurf1/Camk1/Nxt1/Nmd3/Bard1/Txnip/Pkd1/Prkcd/Agt/Jup/Brca1/Ipo5/Flna/Ipo9/Ifi27/Rpsa/Akap13/Ppp2ca/Ipo11/Cdkn1a/Hyal2/Zfp384/Poldip3/Nup85/Eif6/Nxt2/Cep57/Eif5a/Akap5/Nup54/Arntl/Ddx5/Psen1/Ipo8/Rae1/Mapk14/Pml/Nupl2/Ankle1/Gbp4/Syk/Malt1/Xpo7/Cdk1/Cpsf6/Kpna2/Ranbp17/Cfl1/Bcl6/Rapgef3/Thoc5	54
BP	GO:0042267	natural killer cell mediated cytotoxicity	16/2387	62/21092	0.00116221	0.0164065	0.012962	Ptpn6/Lyst/Klrb1b/Klrk1/Prdx1/Klrb1c/Gzmb/Tap2/H60c/Pvr/Coro1a/Il12a/H2-T23/Ulbp1/Ulbp1/Rab27a	16
BP	GO:2000514	regulation of CD4-positive, alpha-beta T cell activation	16/2387	62/21092	0.00116221	0.0164065	0.012962	Cd44/Arg2/Gata3/Nfkbiz/Sash3/Jak3/Myb/Nckap1l/Rc3h2/Runx1/Ager/Ccr2/Malt1/Il2rg/Twsg1/Bcl6	16
BP	GO:1902751	positive regulation of cell cycle G2/M phase transition	10/2387	30/21092	0.00119678	0.0168395	0.0133041	Ccnb1/Ccnd1/Dtl/Lmnb1/Wnt10b/Cdk4/Sin3a/Cdk1/Cdc25c/Fbxo5	10
BP	GO:0045088	regulation of innate immune response	46/2387	258/21092	0.00119856	0.0168395	0.0133041	Dhx9/Cnot7/Klrb1b/Cd300lf/Klrk1/A2m/Polr3f/Trafd1/Pparg/Klrb1c/Tlr11/Ankrd17/Tlr3/Tap2/Peli3/Polr3c/Ticam1/H60c/Ticam2/Nmi/Ffar2/Irgm1/Irgm1/Irgm1/Dab2ip/Pvr/Pum1/Pum1/Serping1/Pqbp1/Gbp5/Tlr8/Tlr7/Sin3a/Traf3/Myo1f/Il12a/Cd74/Irf4/Tlr9/Rps6ka3/H2-T23/Zc3hav1/Ulbp1/Ulbp1/Aim2	46
BP	GO:1901800	positive regulation of proteasomal protein catabolic process	22/2387	98/21092	0.00120629	0.016908	0.0133582	Dab2/Chfr/Rchy1/Arih1/Plk1/Gsk3a/Csnk1e/Il33/Aurka/Csnk1a1/Dnajb2/Psen2/Psen1/Dab2ip/Trib3/Trib1/Usp13/Tmem67/Rnf144b/Gba/Cbfa2t3/Atg7	22
BP	GO:0007019	microtubule depolymerization	14/2387	51/21092	0.00121493	0.016989	0.0134222	Kif2c/Kif18a/Hdgfl3/Kif24/Map2/Nckap5/Cib1/Ckap2/Hdac6/Dysf/Kif18b/Mid1/Map1a/Camsap3	14
BP	GO:0043434	response to peptide hormone	53/2387	308/21092	0.00123896	0.0172843	0.0136555	Ptk2/Pkm/Eif4ebp1/Pak1/Nfkb1/Serpina3i/Stat1/Pdk4/Nr4a2/Prkcd/Gatm/Gatm/Cav2/Prkcb/Mbd5/Pparg/Gsk3a/Nck1/Insr/Pla2g1b/Myo5a/Ptpn1/Grb14/Lpin3/Srebf1/Pxn/Serpina3c/Ptpra/Eif6/Khk/Gck/Lpin2/Rhoq/Trib3/Cdk4/Ccnd3/Uchl3/Pdk2/Grb2/Ywhag/Stxbp4/Hadha/Socs2/Klf15/Sort1/Slc27a1/Slc26a6/Slc26a6/Esrra/Srsf5/Cfl1/Plcd1/Plcb1	53
BP	GO:0042130	negative regulation of T cell proliferation	18/2387	74/21092	0.00124263	0.0172947	0.0136637	Cd44/Ptpn6/Slfn1/Slfn1/Slfn1/Slfn1/Casp3/Zc3h12d/Arg2/Btla/Prnp/Il20rb/H2-Ab1/Tmem131l/Pde5a/H2-Aa/Twsg1/Glmn	18
BP	GO:0009201	ribonucleoside triphosphate biosynthetic process	27/2387	130/21092	0.00126956	0.0176282	0.0139272	Pkm/Nme6/Atp5k/Zbtb20/Pfkp/Pnp/Pfkfb2/Atp5g3/Surf1/Insr/Flcn/Nme2/Prkaa1/Eif6/Khk/Gck/Ncor1/Atp5j2/Atp5b/Nme7/Ddit4/Atp5a1/Atp5a1/Eno4/Impdh1/Sirt6/Cbfa2t3	27
BP	GO:0034504	protein localization to nucleus	50/2387	287/21092	0.00127462	0.0176571	0.01395	Ect2/Ranbp2/Nxt1/Nmd3/Bard1/Txnip/Plk1/Morc3/Prkcd/Agt/Jup/Brca1/Ipo5/Mcrs1/Flna/Cav2/Ipo9/Lzts2/Ppp2ca/Ipo11/Cdkn1a/Hyal2/Nup85/Flcn/Nxt2/Cep57/Akap5/Nup54/Arntl/Hnrnpu/Hnrnpu/Ddx5/Psen1/Ipo8/Zbtb16/Mapk14/Sumo3/Pml/Gbp4/Sin3a/Sun2/Syk/Syne2/Cdk1/Kpna2/Cfl1/Bcl6/Taf3/Nf2/Tor1aip1	50
BP	GO:0120032	regulation of plasma membrane bounded cell projection assembly	35/2387	183/21092	0.00128629	0.0177772	0.0140449	Tbc1d30/Stap1/Kctd17/Arap1/Map4/Prkcd/Anln/Ppp1r9a/Agrn/Ssh3/Tacstd2/Nrxn1/Stau2/Cyld/Wdpcp/Mark4/Rhoq/Twf2/Rac1/Odf2l/Arhgap24/Pqbp1/Tmem67/Cln3/Syne2/Pfn1/Dock11/Dnm3/Slit2/Eps8l2/Cfl1/Cdc42ep4/Cenpj/Icam1/Sh3yl1	35
BP	GO:0048144	fibroblast proliferation	24/2387	111/21092	0.00129312	0.01783	0.0140866	Dhx9/Morc3/Agt/Fn1/Ccnb1/Pparg/Cdkn1a/Pla2g1b/Ccna2/Ednra/Egfr/Ager/Fbrs/Dab2ip/Pex2/E2f1/Cdk4/Pml/Wnt2/Cd74/Med31/Sirt6/Cdc6/Pdgfrb	24
BP	GO:0001818	negative regulation of cytokine production	44/2387	245/21092	0.00130227	0.0179145	0.0141533	Pglyrp1/Ptpn6/Bank1/Nfkb1/Arg2/Gata3/Fn1/Prg4/Jak3/Prnp/Pparg/Homer3/Nckap1l/Il1r2/Arrb1/Il20rb/Il33/Wnt11/Flt3/Peli3/Klf2/Ptprc/Fcgr2b/Ticam2/Nmi/Dll1/Tnfrsf4/Ager/Rac1/Pibf1/Slamf1/Pml/Errfi1/Gbp4/Tlr8/Chid1/Acp5/Il12a/Twsg1/Tlr9/Bcl6/Anxa4/Gba/Zfp36	44
BP	GO:0051058	negative regulation of small GTPase mediated signal transduction	15/2387	57/21092	0.00132205	0.0181445	0.0143351	Git1/Sh3bp1/Itga3/Mapkap1/Dlc1/Dgkz/Flcn/Adra1b/Dab2ip/Arhgap24/Arhgap42/Trim67/Slit2/Bcl6/Arhgap25	15
BP	GO:0043280	positive regulation of cysteine-type endopeptidase activity involved in apoptotic process	26/2387	124/21092	0.00133829	0.0182802	0.0144423	Lck/Stat1/Gramd4/Ifi27/Tnfsf10/Nlrp1a/Nlrp1a/Nlrp1a/Nlrp1a/Pparg/Map3k5/Ppp2ca/Dlc1/Arrb1/Casp8ap2/Tnfsf15/Acer2/Hip1/Fas/Htra2/Pml/Senp1/Men1/Men1/Pidd1/Rhoa	26
BP	GO:0051092	positive regulation of NF-kappaB transcription factor activity	26/2387	124/21092	0.00133829	0.0182802	0.0144423	Dhx9/Chuk/Ube2n/Mid2/Prkcb/Kras/Lrrfip1/Cth/Eda2r/Pla2g1b/Tnfrsf11a/Tlr3/Traf6/Rbck1/Ticam1/Cib1/Terf2ip/Prkch/Ager/Il18r1/Ikbkb/Itgb2/Malt1/Tlr9/Aim2/Icam1	26
BP	GO:0009743	response to carbohydrate	37/2387	197/21092	0.00134119	0.0182802	0.0144423	Nfkb1/Glul/Sidt2/Zbtb20/Casp3/Pfkfb2/Prkcb/Pde8b/Ppp2ca/Arrb1/Nrxn1/Ildr2/Srebf1/Cacna1d/Prkaa1/Khk/Gck/Oxct1/Hmgn3/Ano1/Ager/Ucp2/Ern1/Pde4c/Pde4c/Sin3a/Stxbp4/Tiam1/Map4k4/Birc5/Slc26a6/Slc26a6/Baiap3/Plcb1/Cdt1/Icam1/Atg7	37
BP	GO:0009411	response to UV	28/2387	137/21092	0.00134976	0.0183549	0.0145013	Casp3/Usp47/Ccnd1/Cdkn1a/Hyal2/Usp28/Mfap4/Dtl/Trove2/Gen1/Mme/Prkaa1/Crip1/Ino80/Brca2/Pclaf/Egfr/Pml/Polk/Hyal1/Mettl3/Atr/Aurkb/Il12a/Men1/Men1/Cdkn2d/Ddias	28
BP	GO:0031532	actin cytoskeleton reorganization	22/2387	99/21092	0.00138818	0.018736	0.0148024	Stap1/Rhobtb1/F11r/Nphs2/Pak1/Baiap2/Flna/Antxr1/Dtnbp1/Atp2c1/Ptpn1/Gdpd2/Cdc42bpa/Ctsl/Gmfg/Rictor/Sipa1l1/Cass4/Abl1/Rapgef3/Rhoa/Myh9	22
BP	GO:0035601	protein deacylation	22/2387	99/21092	0.00138818	0.018736	0.0148024	Fnta/Spred2/Prdm5/Kdm5a/Ndst1/Hopx/Srebf1/Prkaa1/Hdac11/Ncor1/Sirt7/Hdac6/Elk4/Dysf/Pml/Sirt3/Sin3a/Fry/Bcl6/Smarcad1/BC004004/Hdac8	22
BP	GO:0098732	macromolecule deacylation	22/2387	99/21092	0.00138818	0.018736	0.0148024	Fnta/Spred2/Prdm5/Kdm5a/Ndst1/Hopx/Srebf1/Prkaa1/Hdac11/Ncor1/Sirt7/Hdac6/Elk4/Dysf/Pml/Sirt3/Sin3a/Fry/Bcl6/Smarcad1/BC004004/Hdac8	22
BP	GO:0010950	positive regulation of endopeptidase activity	31/2387	157/21092	0.00139268	0.018736	0.0148024	Lck/Stat1/Gramd4/Ifi27/Tnfsf10/Nlrp1a/Nlrp1a/Nlrp1a/Nlrp1a/Pparg/Map3k5/Ppp2ca/Dlc1/Arrb1/Casp8ap2/Psme1/Tnfsf15/Acer2/Hip1/Fas/Usp50/Epha4/Htra2/Pml/Tbc1d10a/Senp1/Men1/Men1/Pidd1/Rhoa/Aim2	31
BP	GO:0030330	DNA damage response, signal transduction by p53 class mediator	16/2387	63/21092	0.00139675	0.018736	0.0148024	Cd44/Spred2/Foxm1/Cdkn1a/Chek2/Rbm38/Brca2/Ddx5/Pml/Ing4/Atrx/Atr/Snai1/E2f7/Cd74/Pidd1	16
BP	GO:0071479	cellular response to ionizing radiation	16/2387	63/21092	0.00139675	0.018736	0.0148024	Ect2/Rad51/Gata3/Rad51ap1/Cdkn1a/Tmem109/Map3k20/Blm/Gtf2h5/Chek2/Ino80/Mapk14/Grb2/Atr/Tlk2/Ddias	16
BP	GO:0006401	RNA catabolic process	43/2387	239/21092	0.00141461	0.0189328	0.0149579	Dhx9/Cnot7/Slfn8/Slfn8/Slfn8/Cnot8/Sidt2/Lrpprc/Zc3h12d/Hnrnpc/Pnpt1/Fen1/Hnrnpr/Snd1/Helz2/Thrap3/Pan3/Nanos1/Khsrp/Slfn14/Slfn14/Slfn14/Slfn14/Dhx34/Dna2/Rbm38/Rnaseh2c/Hnrnpu/Hnrnpu/Ddx5/E2f1/Pum1/Pum1/Zc3h14/Tnrc6c/Ago1/Smg1/Mettl3/Edc4/Pabpc1/Rnaseh2a/Zc3hav1/Zfp36	43
BP	GO:0001906	cell killing	32/2387	164/21092	0.00144419	0.0192851	0.0152362	Pglyrp1/Stap1/Ptpn6/Lyst/Tsta3/Pnp/Klrb1b/Ctsh/Klrk1/Cd1d2/Prdx1/Klrb1c/Gzmb/H2-Q7/Tap2/Hamp2/Ptprc/Fcer2a/H60c/Hist1h2bk/Mbl1/Ager/Pvr/Prf1/Ccr5/Coro1a/Il12a/H2-T23/Ulbp1/Ulbp1/Fcgr3/Rab27a	32
BP	GO:0032436	positive regulation of proteasomal ubiquitin-dependent protein catabolic process	19/2387	81/21092	0.00146694	0.019501	0.0154068	Dab2/Chfr/Rchy1/Arih1/Plk1/Gsk3a/Csnk1e/Il33/Aurka/Csnk1a1/Dnajb2/Psen2/Psen1/Trib3/Trib1/Rnf144b/Gba/Cbfa2t3/Atg7	19
BP	GO:0032606	type I interferon production	19/2387	81/21092	0.00146694	0.019501	0.0154068	Dhx9/Chuk/Stat1/Zbtb20/Polr3f/Tlr3/Flt3/Peli3/Polr3c/Ticam1/Nmi/Pqbp1/Gbp4/Tlr8/Tlr7/Syk/Traf3/Tlr9/Zc3hav1	19
BP	GO:0002819	regulation of adaptive immune response	37/2387	198/21092	0.00147334	0.0195423	0.0154394	Cd44/Ptpn6/Gata3/Nfkbiz/Pnp/Mef2c/Nsd2/Sash3/Cd1d2/Jak3/Clcf1/Clcf1/Rc3h2/Tnfrsf13c/Il20rb/Il33/H2-Ab1/H2-Q7/Tap2/Traf6/Ptprc/Fcer2a/Fcgr2b/Trp53bp1/Ager/Tnfsf13b/Pvr/Il18r1/Alox15/Slamf1/Ccr2/Malt1/Il12a/Cd74/Bcl6/H2-T23/Fcgr3	37
BP	GO:0060562	epithelial tube morphogenesis	62/2387	376/21092	0.00151662	0.0200272	0.0158225	Cd44/Aldh1a2/Celsr1/Pak1/Notch2/Adm/Pkd1/Agt/Mthfd1/Csf1/Gata3/Kif3a/Ctsh/Mef2c/Timeless/Kras/C2cd3/Coq7/Slc12a2/Stil/Luzp1/Mgp/Tacstd2/Dlc1/Stard13/Arid1a/Ednra/Cav3/Vangl2/Med12/Sox11/Pxn/Mthfd1l/Traf6/Cecr2/Gatad2a/Nphp3/Ccdc103/Dll1/Tead1/Psen1/Epha4/Rgma/Nfatc1/Hey1/Pml/Kdm2a/Tmem67/Kif26b/Wnt2/Pfn1/Slit2/Abl1/Tnc/Cfl1/Dvl2/Sirt6/Kdr/Rhoa/Glmn/Kif20b/Csnk2b	62
BP	GO:0032535	regulation of cellular component size	65/2387	398/21092	0.00151665	0.0200272	0.0158225	Eln/Rhobtb1/Pak1/Sema3a/Eif4g2/Ulk2/Iqgap3/Prkcd/Baiap2/Fn1/Sh3bp1/Slc12a6/Slc12a6/Ppp1r9a/Cit/Nckap1l/Ssh3/Slc12a2/Bcl11a/Snf8/Nck1/Map2/Cav3/Lamtor5/Tmod2/Spg20/Plekhg2/Actr3b/Ulk1/Twf2/Rac1/Tpm1/Gmfg/Alox15/Pex11a/Rgma/Cdk4/Gmfb/Rufy3/Rictor/Capg/Grb2/Ifrd1/Add1/Ccr5/Coro1a/Bdnf/Lrrc8d/Pfn1/Lrrc8b/Anxa7/Carmil1/Slit2/Wdr36/Abl1/Cfl1/Rapgef3/Rhoa/Cdc42ep4/Sema4d/Sema3f/Ap2m1/Icam1/Pecam1/Sema6a	65
BP	GO:0031669	cellular response to nutrient levels	35/2387	185/21092	0.00156372	0.0205117	0.0162053	Clec16a/Atf3/Glul/Pdk4/Angptl4/Gabarap/Srebf2/Map3k5/Nprl3/Fam107a/Cdkn1a/Map1lc3b/Srebf1/Cadps2/Prkaa1/Klf10/Gck/Ulk1/Fas/Rnase4/Hnrnpl/Snw1/Postn/Rnf152/Pdk2/Lamp2/Folr2/Atf4/Zfyve1/Ncoa1/Gba/Higd1a/Pik3r4/Ehmt2/Atg7	35
BP	GO:0050870	positive regulation of T cell activation	35/2387	185/21092	0.00156372	0.0205117	0.0162053	Icos/Lck/Gata3/Nfkbiz/Pnp/Sash3/Jak3/Myb/Nckap1l/Nck1/Tnfrsf13c/Cyld/Blm/H2-Ab1/Traf6/Ptprc/Runx1/Ager/Tnfsf13b/Zbtb16/Slamf1/Ccr2/Slc4a1/Efnb1/Syk/Malt1/Coro1a/H2-Aa/Il12a/Cd74/Il2rg/Bcl6/H2-T23/Ap3b1/Rhoa	35
BP	GO:0060491	regulation of cell projection assembly	35/2387	185/21092	0.00156372	0.0205117	0.0162053	Tbc1d30/Stap1/Kctd17/Arap1/Map4/Prkcd/Anln/Ppp1r9a/Agrn/Ssh3/Tacstd2/Nrxn1/Stau2/Cyld/Wdpcp/Mark4/Rhoq/Twf2/Rac1/Odf2l/Arhgap24/Pqbp1/Tmem67/Cln3/Syne2/Pfn1/Dock11/Dnm3/Slit2/Eps8l2/Cfl1/Cdc42ep4/Cenpj/Icam1/Sh3yl1	35
BP	GO:0006270	DNA replication initiation	10/2387	31/21092	0.00158946	0.0206606	0.0163229	Ccne2/Ccne1/Ticrr/Orc3/Mcm3/Mcm7/Orc1/Orc6/Cdc6/Cdt1	10
BP	GO:0006335	DNA replication-dependent nucleosome assembly	10/2387	31/21092	0.00158946	0.0206606	0.0163229	Hist1h3a/Hist1h4f/Asf1b/Hist2h3b/Hist1h4b/Hist1h3h/Hist2h3c2/Hist2h3c1/Hist1h3g/Hist1h3i	10
BP	GO:0034723	DNA replication-dependent nucleosome organization	10/2387	31/21092	0.00158946	0.0206606	0.0163229	Hist1h3a/Hist1h4f/Asf1b/Hist2h3b/Hist1h4b/Hist1h3h/Hist2h3c2/Hist2h3c1/Hist1h3g/Hist1h3i	10
BP	GO:0031396	regulation of protein ubiquitination	36/2387	192/21092	0.00159269	0.0206606	0.0163229	Chfr/Rchy1/Plk1/Ube2n/Brca1/Rassf1/Gsk3a/Skp2/Skp2/Mtbp/Fam107a/Arrb1/Dnajb2/Rnf20/Peli3/Ticam1/Fgfr3/Cdk9/Fanci/Nhlrc1/Nmi/Psen2/Psen1/Dysf/Trib3/Trib1/Mastl/Gbp4/Kdm2a/Cdc20/Commd1/Abl1/Plaa/Hdac8/Fbxo5/Atg7	36
BP	GO:0010771	negative regulation of cell morphogenesis involved in differentiation	22/2387	100/21092	0.00159303	0.0206606	0.0163229	Ptk2/Sema3a/Ulk2/Cit/Dtnbp1/Bcl11a/Tacstd2/Ttc3/Map2/Spg20/Ulk1/Psen1/Postn/Rgma/Rufy3/Ifrd1/Ccr5/Dnm3/Slit2/Sema4d/Sema3f/Sema6a	22
BP	GO:0044773	mitotic DNA damage checkpoint	15/2387	58/21092	0.00159955	0.0206606	0.0163229	Rfwd3/Syf2/Ccnd1/Cdkn1a/Dgkz/Blm/Chek2/Rbm38/Pml/Fbxo31/Cdk1/Mus81/Pidd1/Nek11/Eme1	15
BP	GO:0099024	plasma membrane invagination	15/2387	58/21092	0.00159955	0.0206606	0.0163229	Stap1/Rhobtb1/Sh3bp1/Pparg/Nckap1l/Fcgr2b/Ager/Rac1/Alox15/Itgb2/Aurkb/Rhoa/Myh9/Fcgr3/Arhgap25	15
BP	GO:0072503	cellular divalent inorganic cation homeostasis	77/2387	488/21092	0.00160295	0.0206606	0.0163229	Npy1r/Ptpn6/Dlg4/Lck/Got1/Kctd17/Atp2a3/Adm/Pkd1/Agt/Xcr1/Rap1gds1/Bdkrb2/F2rl3/Jak3/Cxcr5/Cxcr3/Prkcb/Prnp/Atp2c1/Slc39a7/Slc39a13/Fxyd1/Ackr4/Ptgfr/Smdt1/Pla2g1b/Myo5a/P2ry10/Ednra/Cav3/Trpv6/Cd19/Gtf2i/Trdn/Cacnb3/Htr2c/Atp1b1/Ptprc/Gck/Ccrl2/Eif5a/Akap5/Psen2/Slc35g1/Immt/Mt2/Psen1/Adra1b/Atp2c2/Gpr33/Ccr2/Pml/Cherp/Maip1/Cln3/Sppl3/Cacna1c/Ptger1/Atf4/Ccr5/Synpo/Coro1a/Atp2b1/Hrc/Anxa7/Micu1…	77
BP	GO:0007162	negative regulation of cell adhesion	49/2387	283/21092	0.00161829	0.0208131	0.0164434	Cd44/Ptk2/Ptpn6/Slfn1/Slfn1/Slfn1/Slfn1/Casp3/Zc3h12d/Prkcd/Arg2/Jak3/Btla/Prnp/Plxnc1/Rc3h2/Tacstd2/Fam107a/Dlc1/Il20rb/Cyld/H2-Ab1/Ptprc/Runx1/Wnk1/Acer2/Tmem131l/Ager/Cd9/Postn/Pde5a/Atp5b/Phldb2/Myo1f/H2-Aa/Dact2/Cd74/Abl1/Twsg1/Men1/Men1/Tnc/Cfl1/Bcl6/Rhoa/Nf2/Glmn/Sema4d/Sema6a	49
BP	GO:0010224	response to UV-B	7/2387	17/21092	0.00163615	0.0209972	0.0165889	Cdkn1a/Hyal2/Mfap4/Mme/Crip1/Hyal1/Il12a	7
BP	GO:0045582	positive regulation of T cell differentiation	21/2387	94/21092	0.00164331	0.0209983	0.0165897	Lck/Gata3/Nfkbiz/Pnp/Sash3/Myb/Nckap1l/Cyld/Ptprc/Runx1/Zbtb16/Ccr2/Syk/Malt1/H2-Aa/Il12a/Cd74/Il2rg/Bcl6/Ap3b1/Rhoa	21
BP	GO:1901222	regulation of NIK/NF-kappaB signaling	21/2387	94/21092	0.00164331	0.0209983	0.0165897	Eda/Agt/Traf4/Prdx1/Rc3h2/Chil1/Cyld/Tlr3/Rassf2/Traf6/Rbck1/Tnfsf15/Terf2ip/Ptp4a3/Egfr/Ager/Il18r1/Ago1/Tlr7/Malt1/Tlr9	21
BP	GO:0048588	developmental cell growth	45/2387	255/21092	0.00166384	0.0211072	0.0166757	Smurf1/Pak1/Sema3a/Eif4g2/Ulk2/Agt/Col14a1/Fn1/Fdps/Bcl11a/Gsk3a/Akap13/Trip10/Map2/Aurka/Cav3/Sorbs2/Spg20/Ulk1/Adra1b/Twf2/Hdac6/Jade2/Postn/Rgma/Rufy3/Sh3gl2/Ifrd1/Tiam1/Ccr5/Syt17/Bdnf/Rgs2/Wisp1/Slit2/Wdr36/Abl1/Sirt6/Prmt2/Sema4d/Plaa/Sema3f/Nin/Camk2d/Sema6a	45
BP	GO:0014888	striated muscle adaptation	13/2387	47/21092	0.00166607	0.0211072	0.0166757	Kdm4a/Mef2c/Nppa/Camta2/Gtf2i/Tead1/Gtf2ird1/Nfatc1/Errfi1/Inpp5f/Klf15/Gtf2ird2/Ezh2	13
BP	GO:0030865	cortical cytoskeleton organization	13/2387	47/21092	0.00166607	0.0211072	0.0166757	Kif23/Ect2/Racgap1/Anln/Epb41l1/Nckap1l/Epb41/Strip1/Rhoq/Ikbkb/Epb41l3/Synpo/Fmnl2	13
BP	GO:0120163	negative regulation of cold-induced thermogenesis	13/2387	47/21092	0.00166607	0.0211072	0.0166757	Nr1h2/Npr3/Ip6k1/Flcn/Dock7/Wnt10b/Arntl/Tfe3/Il18r1/Atf4/Map2k6/Acot11/Lama4	13
BP	GO:0090407	organophosphate biosynthetic process	75/2387	474/21092	0.00169413	0.0214169	0.0169204	Pgap2/Pkm/Nme6/Guk1/Sgms1/Atp5k/Pdk4/Zbtb20/Gpaa1/Pfkp/Mthfd1/Pnp/Cdipt/Pfkfb2/Atp5g3/Fdps/Surf1/Papss1/Rrm2/Hddc2/Rrm1/Ip6k1/Dgkz/Nppa/Agpat3/Insr/Flcn/Nme2/Tyms/Adcy3/Htr2c/Prkaa1/Eif6/Khk/Gnpat/Dpm1/Mocs1/Gck/Ncor1/Ajuba/Pcyt1a/Lpcat3/Pip5k1c/Cept1/Gpat4/Aprt/Adssl1/Pigb/Alox15/Atp5j2/Atp5b/Pdk2/Gars/Nme7/Ddit4/Atp5a1/Atp5a1/Eno4/Serac1/Slc27a1/Pgap1/Adcy4/Vac14/Impdh1/Haao/Sirt6/Dpagt1/Kynu/P…	75
BP	GO:1901070	guanosine-containing compound biosynthetic process	6/2387	13/21092	0.00176704	0.022291	0.017611	Nme6/Guk1/Pnp/Nme2/Nme7/Impdh1	6
BP	GO:0043624	cellular protein complex disassembly	27/2387	133/21092	0.00180413	0.0227106	0.0179425	Kif2c/Sh3bp1/Kif18a/Hdgfl3/Kif24/Map2/Tmod2/Nckap5/Eif5a/Akap5/Cib1/Ckap2/Twf2/Hdac6/Dysf/Tpm1/Kif18b/Ogfod1/2810006K23Rik/Capg/Sh3gl2/Add1/Carmil1/Cfl1/Mid1/Map1a/Camsap3	27
BP	GO:0050732	negative regulation of peptidyl-tyrosine phosphorylation	14/2387	53/21092	0.00181957	0.0227563	0.0179787	Ptpn6/Prkcd/Mvp/Hyal2/Sh3bp5/Ptprc/Psen2/Psen1/Pibf1/Errfi1/Inpp5f/Nf2/Sema4d/Pecam1	14
BP	GO:1902750	negative regulation of cell cycle G2/M phase transition	14/2387	53/21092	0.00181957	0.0227563	0.0179787	Fhl1/Plk1/Brca1/Ticrr/Syf2/Usp47/Babam2/Dtl/Blm/Abraxas1/Orc1/Cdk1/Cdc6/Rad17	14
BP	GO:0030038	contractile actin filament bundle assembly	22/2387	101/21092	0.00182312	0.0227563	0.0179787	Eln/Pak1/Ttc8/Arap1/Ppp1r9a/Tacstd2/Dlc1/Arrb1/Alms1/Wnt11/Pxn/Rac1/Tpm1/Phldb2/Synpo/Pfn1/Carmil1/Abl1/Rapgef3/Rhoa/Nf2/Zyx	22
BP	GO:0043149	stress fiber assembly	22/2387	101/21092	0.00182312	0.0227563	0.0179787	Eln/Pak1/Ttc8/Arap1/Ppp1r9a/Tacstd2/Dlc1/Arrb1/Alms1/Wnt11/Pxn/Rac1/Tpm1/Phldb2/Synpo/Pfn1/Carmil1/Abl1/Rapgef3/Rhoa/Nf2/Zyx	22
BP	GO:0038083	peptidyl-tyrosine autophosphorylation	12/2387	42/21092	0.00183458	0.0228034	0.0180159	Ptk2/Lck/Srms/Insr/Sla/Ctnnd1/Ctnnd1/Egfr/Syk/Abl1/Kdr/Blk	12
BP	GO:0097300	programmed necrotic cell death	12/2387	42/21092	0.00183458	0.0228034	0.0180159	Ybx3/Nlrp1a/Nlrp1a/Nlrp1a/Nlrp1a/Map3k5/Cyld/Tlr3/Rbck1/Fas/Ppif/Mlkl	12
BP	GO:0061982	meiosis I cell cycle process	24/2387	114/21092	0.00189603	0.023518	0.0185804	Ccne2/Pttg1/Ccne1/Rad51/Trip13/Tex15/Terf1/Plk1/Cenpx/Msh3/Mybl1/Top2a/Blm/Aurka/Brca2/Cenpc1/Fancd2/Brip1/Mus81/Cdc25c/Cks2/Ehmt2/Fbxo5/Eme1	24
BP	GO:0051147	regulation of muscle cell differentiation	31/2387	160/21092	0.00190633	0.0235963	0.0186423	Bhlhe41/Camk1/Pak1/Col14a1/Mef2c/Hopx/Fdps/Nfatc2/Gsk3a/Akap13/Dnmt1/Cth/Ankrd17/Trip10/Cav3/Ccl8/Cdk9/Eif5a/Rbm38/Dll1/Mapk14/Nfatc1/Cyp26b1/Epc1/Bdnf/Rgs2/Wisp1/Zeb1/Ehd1/Ehd1/Ezh2	31
BP	GO:0072659	protein localization to plasma membrane	47/2387	271/21092	0.0019205	0.0237222	0.0187417	Tspan33/Dab2/F11r/Cnst/Nsf/Golph3/Ttc8/Jup/Fyb/Flna/Zdhhc23/Prnp/Itga3/Stx3/Kcnb2/Nrxn1/Myo5a/Cav3/Cacnb3/Atp1b1/D230025D16Rik/Akap5/Cib1/Mrap2/Sqstm1/Egfr/Rhoq/Ttc7/Gopc/Afdn/Atp2c2/Rac1/Ikbkb/Camk2g/Epb41l3/Kcnip4/Cln3/Actb/Stx8/Commd1/Myl12a/Ankrd9/Rab3a/Rab3a/Rapgef6/Ap2m1/Camk2d	47
BP	GO:0010769	regulation of cell morphogenesis involved in differentiation	56/2387	336/21092	0.00195038	0.0240412	0.0189938	Dab2/Ptk2/Pak1/Sema3a/Eif4g2/Ulk2/Baiap2/Fn1/Flna/Ppp1r9a/Ephb3/Cux1/Cit/Dtnbp1/Agrn/Plxnc1/Ssh3/Bcl11a/Tacstd2/Stau2/Ttc3/Map2/Eef2k/Robo2/Spg20/Nedd4/Akap5/Cib1/Ulk1/Psen1/Twf2/Rac1/Epha4/Postn/Rgma/Mark2/Rufy3/Pqbp1/Sipa1l1/Cass4/Ifrd1/Tiam1/Ccr5/Map6/Bdnf/Fbxo31/Dnm3/Carmil1/Slit2/Wdr36/Abl1/Cfl1/Sema4d/Sema3f/Nin/Sema6a	56
BP	GO:0032147	activation of protein kinase activity	43/2387	243/21092	0.00197002	0.0242328	0.0191452	Dab2/Ect2/Pak1/Spag9/Iqgap3/Map4k1/Prkcd/Agt/Traf4/Madd/Prnp/Map3k5/Ang/Pak6/Arrb1/Chil1/Insr/Map3k20/Pla2g1b/Ptpn1/Plce1/Pxn/Traf6/Cd81/Ptprc/Itga1/Tnfsf15/Egfr/Psen1/Tpx2/Dab2ip/Pibf1/Ern1/Syk/Malt1/Map4k4/Lamtor3/Mlkl/Cd74/Map3k14/Abl1/Map2k6/Map3k10	43
BP	GO:0061900	glial cell activation	11/2387	37/21092	0.00198116	0.0242819	0.019184	Stap1/Agt/Il33/Tlr3/Egfr/Ager/Psen1/Tlr8/Ldlr/Tlr7/Tlr9	11
BP	GO:0051298	centrosome duplication	16/2387	65/21092	0.00198638	0.0242819	0.019184	Nubp1/Brca1/Chmp4b/Mdm1/C2cd3/Stil/Cep192/Gen1/Brca2/Wdr62/Kifc1/Ccnf/Tmem67/Deup1/Nde1/Cenpj	16
BP	GO:0042632	cholesterol homeostasis	19/2387	83/21092	0.00198713	0.0242819	0.019184	Lpl/Gpihbp1/Nr1h2/Srebf2/Raly/Alms1/Plscr3/Cav3/Acox1/Ncor1/Pex2/Insig1/Ldlr/Soat1/Commd1/Ehd1/Ehd1/Sec24a/Lamtor1	19
BP	GO:0045185	maintenance of protein location	23/2387	108/21092	0.00199039	0.0242819	0.019184	Golph3/Bard1/Pkd1/Morc3/Mprip/Flna/Fbn1/Ltbp1/Ywhab/Tacc3/Pip5k1c/Hnrnpu/Hnrnpu/Gopc/Twf2/Nrros/Pml/Epb41l3/Insig1/Sun2/Syne2/Pfn1/Taf3	23
BP	GO:0050714	positive regulation of protein secretion	50/2387	293/21092	0.00200125	0.0243643	0.019249	Lpl/Dhx9/Golph3/Chuk/Glul/Nr1h2/Agt/Gata3/Ncl/Pfkfb2/Nlrp1a/Nlrp1a/Nlrp1a/Nlrp1a/Clec9a/Exoc1/Ang/Arrb1/Hyal2/Zfp384/Il33/Cacna1d/Flt3/Doc2b/Gck/Tnfsf15/Oxct1/Myrip/Usp50/Mmp13/Tnfrsf4/Ano1/Egfr/Ffar2/Mapk14/Postn/Slamf1/Sirt3/Tlr8/Syk/Ccr5/Baiap3/Abl1/Wls/H2-T23/Sec24a/Glmn/Blk/Aim2/Atg7	50
BP	GO:0032729	positive regulation of interferon-gamma production	18/2387	77/21092	0.00201168	0.0244411	0.0193097	Sash3/Klrk1/Tnfrsf13c/Tlr3/H2-Q7/Flt3/Runx1/Ticam2/Il18r1/Slamf1/Ccr2/Tlr8/Tlr7/Il12a/Abl1/Tlr9/Ulbp1/Ulbp1	18
BP	GO:0016358	dendrite development	49/2387	286/21092	0.00202685	0.0245751	0.0194155	Dlg4/Camk1/Pak1/Mef2a/Sema3a/Eif4g2/Trappc4/Vldlr/Git1/Baiap2/Mef2c/Ppp1r9a/Ephb3/Cux1/Cit/Dtnbp1/Bcl11a/Gsk3a/Itsn1/Cyth2/Stau2/Map2/Eef2k/Nedd4/Dock10/Shank1/Fcgr2b/Akap5/Fas/Btbd3/Psen1/Hdac6/Dab2ip/Rac1/Epha4/Pqbp1/Sipa1l1/Tiam1/Cdc20/Map6/Bdnf/Kidins220/Fbxo31/Dnm3/Cfl1/Rhoa/Sema4d/Map1a/Ezh2	49
BP	GO:0032728	positive regulation of interferon-beta production	10/2387	32/21092	0.00208034	0.0250698	0.0198064	Dhx9/Zbtb20/Polr3f/Tlr3/Polr3c/Ticam1/Tlr8/Tlr7/Tlr9/Zc3hav1	10
BP	GO:0071539	protein localization to centrosome	10/2387	32/21092	0.00208034	0.0250698	0.0198064	Mcph1/Spag5/C2cd3/Nudcd3/Stil/Aurka/Cep192/Mark4/Pibf1/Hook3	10
BP	GO:1903146	regulation of autophagy of mitochondrion	10/2387	32/21092	0.00208034	0.0250698	0.0198064	Clec16a/Smurf1/Gsk3a/Srebf1/Usp30/Hdac6/Htra2/Atpif1/Fbxo7/Gba	10
BP	GO:0051570	regulation of histone H3-K9 methylation	9/2387	27/21092	0.00209386	0.0251815	0.0198947	Kdm4a/Brca1/Myb/Dnmt1/Pax5/Atrx/Kdm4b/Hist1h1b/Ehmt2	9
BP	GO:0060271	cilium assembly	51/2387	301/21092	0.00212139	0.025461	0.0201155	Tbc1d30/Ift43/Mcidas/Sept10/Ttc8/Unc119b/Kctd17/Bbs10/Dctn1/Itprip/Map4/Ablim1/Kif3a/Flna/Hyls1/Stk36/C2cd3/Nudcd3/Stil/Cfap53/Alms1/Kif24/Cyld/Trove2/Vangl2/Wdr90/Ccno/Wdpcp/Nphp3/Ptpdc1/Tmem107/Ccdc103/Mark4/Ttll5/B9d2/Odf2l/Pibf1/Pqbp1/Cfap44/Tmem67/Dnah8/Syne2/Sept8/Sept3/Ehd1/Ehd1/Fam161a/Lrrc49/Ccdc28b/Tmem80/Cenpj	51
BP	GO:0006874	cellular calcium ion homeostasis	73/2387	463/21092	0.00212607	0.0254656	0.0201191	Npy1r/Ptpn6/Dlg4/Lck/Got1/Kctd17/Atp2a3/Adm/Pkd1/Agt/Xcr1/Rap1gds1/Bdkrb2/F2rl3/Jak3/Cxcr5/Cxcr3/Prkcb/Prnp/Atp2c1/Fxyd1/Ackr4/Ptgfr/Smdt1/Pla2g1b/Myo5a/P2ry10/Ednra/Cav3/Trpv6/Cd19/Gtf2i/Trdn/Cacnb3/Htr2c/Atp1b1/Ptprc/Gck/Ccrl2/Eif5a/Akap5/Psen2/Slc35g1/Immt/Psen1/Adra1b/Atp2c2/Gpr33/Ccr2/Pml/Cherp/Maip1/Cln3/Sppl3/Cacna1c/Ptger1/Atf4/Ccr5/Synpo/Coro1a/Atp2b1/Hrc/Anxa7/Micu1/Abl1/Pygm/Pygm/Kdr/P…	73
BP	GO:0035710	CD4-positive, alpha-beta T cell activation	21/2387	96/21092	0.00216497	0.0258793	0.020446	Cd44/Arg2/Gata3/Nfkbiz/Sash3/Jak3/Myb/Nckap1l/Rc3h2/Satb1/Runx1/Ncor1/Ager/Il18r1/Ccr2/Malt1/Il12a/Il2rg/Irf4/Twsg1/Bcl6	21
BP	GO:0071322	cellular response to carbohydrate stimulus	29/2387	148/21092	0.00219768	0.0262174	0.0207131	Nfkb1/Sidt2/Zbtb20/Prkcb/Pde8b/Ppp2ca/Arrb1/Nrxn1/Cacna1d/Prkaa1/Oxct1/Hmgn3/Ano1/Ager/Ucp2/Ern1/Pde4c/Pde4c/Sin3a/Stxbp4/Tiam1/Map4k4/Birc5/Slc26a6/Slc26a6/Baiap3/Plcb1/Icam1/Atg7	29
BP	GO:0030041	actin filament polymerization	33/2387	175/21092	0.00220966	0.0263074	0.0207841	Eln/Rhobtb1/Prkcd/Baiap2/Ppp1r9a/Nckap1l/Nck1/Fam107a/Diaph3/Tmod2/Ttc17/Plekhg2/Actr3b/Washc3/Twf2/Rac1/Tpm1/Gmfg/Alox15/Gmfb/Rictor/Capg/Grb2/Add1/Coro1a/Pfn1/Carmil1/Slit2/Cfl1/Rhoa/Cdc42ep4/Icam1/Pecam1	33
BP	GO:0071695	anatomical structure maturation	34/2387	182/21092	0.0022473	0.0266299	0.021039	Aldh1a2/Trip13/Nsun2/Nr4a2/Gata3/Ccnb1/Nrcam/Trpc4ap/Bcl11a/Flvcr1/Nrxn1/Ankrd17/Myo5a/Aurka/Grb14/Phospho1/Slfn14/Slfn14/Slfn14/Slfn14/Klf2/Fgfr3/Rflnb/Wnt10b/Psen2/Gpat4/Brca2/Psen1/Rac1/Ctsl/Rhoa/Plcb1/Sema4d/Fbxo5	34
BP	GO:0007127	meiosis I	23/2387	109/21092	0.00225794	0.0266299	0.021039	Ccne2/Pttg1/Ccne1/Rad51/Trip13/Tex15/Terf1/Plk1/Cenpx/Msh3/Mybl1/Top2a/Blm/Aurka/Brca2/Cenpc1/Fancd2/Brip1/Mus81/Cks2/Ehmt2/Fbxo5/Eme1	23
BP	GO:0032649	regulation of interferon-gamma production	23/2387	109/21092	0.00225794	0.0266299	0.021039	Pglyrp1/Gata3/Sash3/Klrk1/Prnp/Tnfrsf13c/Il20rb/Il33/Tlr3/H2-Q7/Flt3/Runx1/Ticam2/Il18r1/Slamf1/Ccr2/Tlr8/Tlr7/Il12a/Abl1/Tlr9/Ulbp1/Ulbp1	23
BP	GO:0048145	regulation of fibroblast proliferation	23/2387	109/21092	0.00225794	0.0266299	0.021039	Dhx9/Morc3/Agt/Fn1/Ccnb1/Pparg/Cdkn1a/Pla2g1b/Ccna2/Egfr/Ager/Fbrs/Dab2ip/Pex2/E2f1/Cdk4/Pml/Wnt2/Cd74/Med31/Sirt6/Cdc6/Pdgfrb	23
BP	GO:0072331	signal transduction by p53 class mediator	27/2387	135/21092	0.00225921	0.0266299	0.021039	Cd44/Spred2/Zfp385b/Pak1ip1/Bdkrb2/Foxm1/Cdkn1a/Eda2r/Tmem109/Usp28/Chek2/Rbm38/Brca2/Ddx5/Snw1/E2f1/Pml/Ing4/Pdk2/Atrx/Atr/Ddit4/Snai1/E2f7/Cd74/Pidd1/Shisa5	27
BP	GO:0051146	striated muscle cell differentiation	51/2387	302/21092	0.00227818	0.0267116	0.0211035	Bhlhe41/Actg1/Chuk/Pak1/Mef2a/Spag9/Agt/Col14a1/Mef2c/Cav2/Hopx/Fdps/Kras/Nfatc2/Gsk3a/Akap13/Tbx5/Trip10/Arid1a/Cav3/Sorbs2/Tmod2/Ccl8/Sgcd/Wnt10b/Rbm38/Ldb3/Dll1/Popdc2/Hnrnpu/Hnrnpu/Adra1b/Hdac6/Dysf/Mapk14/Cdon/Cyp26b1/Epc1/Bdnf/Myh11/Sort1/Rgs2/Wisp1/Ehd1/Ehd1/Tanc1/Myh9/Ezh2/Camk2d/Pdgfrb/Atg7	51
BP	GO:0045740	positive regulation of DNA replication	12/2387	43/21092	0.00228657	0.0267116	0.0211035	Dhx9/E2f8/Wiz/Dna2/Ino80/Egfr/Rac1/Atrx/E2f7/Cdk1/Cdt1/Dbf4	12
BP	GO:0051653	spindle localization	12/2387	43/21092	0.00228657	0.0267116	0.0211035	Spdl1/Mcph1/Nusap1/Dctn1/Map4/Spag5/Cenpa/Gpsm2/Ndc80/Aspm/Nde1/Myh9	12
BP	GO:0060964	regulation of gene silencing by miRNA	12/2387	43/21092	0.00228657	0.0267116	0.0211035	Dhx9/Nfkb1/Wtip/Pparg/Ncor1/Ajuba/Ddx5/Egfr/Pum1/Pum1/Tnrc6c/Zfp36	12
BP	GO:0050678	regulation of epithelial cell proliferation	58/2387	353/21092	0.00228866	0.0267116	0.0211035	Dab2/Aldh1a2/Tgm1/Stat1/Glul/Iqgap3/Gata3/Kif3a/Mef2c/Cav2/Egfl7/Cxcr3/Pparg/Ang/Ccnd1/Slurp1/Tacstd2/Nfib/Bnc1/Nme2/Ednra/Scn5a/Sox11/Strap/Fgfr3/Wnt10b/Ecm1/Htra1/Brca2/Egfr/Fgfbp1/Ager/Dab2ip/Dysf/Pex2/Ctsl/Hey1/Rictor/Hyal1/Errfi1/Lims2/Vegfb/Stxbp4/Tinf2/Sulf1/Atpif1/Atp5a1/Atp5a1/Wnt2/Birc5/Wdr13/Men1/Men1/Sirt6/Kdr/C5ar1/Zfp36/Klf9	58
BP	GO:0055092	sterol homeostasis	19/2387	84/21092	0.00230069	0.0267992	0.0211727	Lpl/Gpihbp1/Nr1h2/Srebf2/Raly/Alms1/Plscr3/Cav3/Acox1/Ncor1/Pex2/Insig1/Ldlr/Soat1/Commd1/Ehd1/Ehd1/Sec24a/Lamtor1	19
BP	GO:0051495	positive regulation of cytoskeleton organization	39/2387	217/21092	0.00233524	0.0271483	0.0214485	Stap1/Rhobtb1/Pak1/Terf1/Dctn1/Baiap2/Flna/Spag5/Nckap1l/Nck1/Cav3/Pfdn2/Wnt11/Gpsm2/Pxn/Actr3b/Clip1/Rac1/Tpm1/Gmfg/Alox15/Gmfb/Rictor/Grb2/Pde4dip/Synpo/Coro1a/Pfn1/Carmil1/Abl1/Cfl1/Rapgef3/Rhoa/Nf2/Cdc42ep4/Psrc1/Cenpj/Nin/Icam1	39
BP	GO:0010324	membrane invagination	16/2387	66/21092	0.00235145	0.0272832	0.0215551	Stap1/Rhobtb1/Smurf1/Sh3bp1/Pparg/Nckap1l/Fcgr2b/Ager/Rac1/Alox15/Itgb2/Aurkb/Rhoa/Myh9/Fcgr3/Arhgap25	16
BP	GO:0001913	T cell mediated cytotoxicity	17/2387	72/21092	0.00236287	0.0273622	0.0216175	Tsta3/Pnp/Ctsh/Cd1d2/Gzmb/H2-Q7/Tap2/Ptprc/H60c/Ager/Pvr/Prf1/Il12a/H2-T23/Ulbp1/Ulbp1/Rab27a	17
BP	GO:0032231	regulation of actin filament bundle assembly	22/2387	103/21092	0.00236889	0.0273785	0.0216304	Pak1/Ttc8/Arap1/Flna/Ppp1r9a/Tacstd2/Dlc1/Alms1/Wnt11/Pxn/Shank1/Rac1/Tpm1/Phldb2/Synpo/Pfn1/Carmil1/Abl1/Cfl1/Rapgef3/Rhoa/Nf2	22
BP	GO:0030100	regulation of endocytosis	47/2387	274/21092	0.00240852	0.0277824	0.0219495	Dab2/Stap1/Pard3/Ptk2/Nsf/Dlg4/Atxn2/Cd151/Nr1h2/Kif3a/Cd300lf/Pparg/Dtnbp1/Nckap1l/Lman2/Hist1h1a/Ptx3/Lrpap1/Itsn1/Arrb1/Lrsam1/Ptpn1/Cav3/Eef2k/Nedd4/Ston2/Ptprc/Fcgr2b/Akap5/Hip1/Dll1/Pip5k1c/Mbl1/Ager/Dysf/Alox15/Sh3gl2/Ldlr/Mtmr2/Syk/Add1/Aak1/Fcgr3/Syt7/Rab27a/Ap2m1/Atg7	47
BP	GO:0009165	nucleotide biosynthetic process	46/2387	267/21092	0.00243617	0.0280468	0.0221584	Pkm/Nme6/Guk1/Atp5k/Pdk4/Zbtb20/Pfkp/Mthfd1/Pnp/Pfkfb2/Atp5g3/Surf1/Papss1/Rrm2/Hddc2/Rrm1/Nppa/Insr/Flcn/Nme2/Tyms/Adcy3/Prkaa1/Eif6/Khk/Gck/Ncor1/Aprt/Adssl1/Atp5j2/Atp5b/Pdk2/Gars/Nme7/Ddit4/Atp5a1/Atp5a1/Eno4/Adcy4/Impdh1/Haao/Sirt6/Kynu/Oasl2/Kmo/Cbfa2t3	46
BP	GO:0034284	response to monosaccharide	34/2387	183/21092	0.00246659	0.0283418	0.0223915	Glul/Sidt2/Zbtb20/Casp3/Pfkfb2/Pde8b/Ppp2ca/Arrb1/Nrxn1/Ildr2/Srebf1/Cacna1d/Prkaa1/Khk/Gck/Oxct1/Hmgn3/Ano1/Ager/Ucp2/Ern1/Pde4c/Pde4c/Sin3a/Stxbp4/Tiam1/Map4k4/Birc5/Slc26a6/Slc26a6/Baiap3/Plcb1/Icam1/Atg7	34
BP	GO:0032781	positive regulation of ATPase activity	11/2387	38/21092	0.00250725	0.028378	0.0224201	Dhx9/Dnajb2/Atp1b1/Myl4/Hnrnpu/Hnrnpu/Tpm1/Pfn1/Rapgef3/Zc3hav1/Tor1aip1	11
BP	GO:0046460	neutral lipid biosynthetic process	11/2387	38/21092	0.00250725	0.028378	0.0224201	Lpl/Nr1h2/Ang/Plpp1/Dgat1/Lpin3/Srebf1/Lpin2/Gpat4/Ldlr/Slc27a1	11
BP	GO:0046463	acylglycerol biosynthetic process	11/2387	38/21092	0.00250725	0.028378	0.0224201	Lpl/Nr1h2/Ang/Plpp1/Dgat1/Lpin3/Srebf1/Lpin2/Gpat4/Ldlr/Slc27a1	11
BP	GO:0051293	establishment of spindle localization	11/2387	38/21092	0.00250725	0.028378	0.0224201	Spdl1/Mcph1/Nusap1/Dctn1/Map4/Spag5/Cenpa/Gpsm2/Ndc80/Nde1/Myh9	11
BP	GO:0150076	neuroinflammatory response	11/2387	38/21092	0.00250725	0.028378	0.0224201	Stap1/Agt/Il33/Tlr3/Egfr/Ager/Psen1/Tlr8/Ldlr/Tlr7/Tlr9	11
BP	GO:0006911	phagocytosis, engulfment	13/2387	49/21092	0.00250803	0.028378	0.0224201	Stap1/Rhobtb1/Sh3bp1/Pparg/Nckap1l/Fcgr2b/Ager/Rac1/Alox15/Itgb2/Myh9/Fcgr3/Arhgap25	13
BP	GO:0031113	regulation of microtubule polymerization	13/2387	49/21092	0.00250803	0.028378	0.0224201	Pak1/Terf1/Dctn1/Map2/Cav3/Clip1/Rac1/Inpp5j/Pde4dip/Abl1/Psrc1/Nin/Camsap3	13
BP	GO:0046638	positive regulation of alpha-beta T cell differentiation	13/2387	49/21092	0.00250803	0.028378	0.0224201	Nfkbiz/Pnp/Sash3/Myb/Nckap1l/Runx1/Zbtb16/Ccr2/Syk/Malt1/Il2rg/Ap3b1/Rhoa	13
BP	GO:0071375	cellular response to peptide hormone stimulus	41/2387	232/21092	0.00253022	0.0285203	0.0225325	Ptk2/Pkm/Eif4ebp1/Pak1/Nfkb1/Stat1/Pdk4/Nr4a2/Prkcd/Cav2/Prkcb/Mbd5/Pparg/Gsk3a/Nck1/Insr/Pla2g1b/Myo5a/Ptpn1/Grb14/Lpin3/Srebf1/Pxn/Ptpra/Gck/Lpin2/Rhoq/Trib3/Cdk4/Ccnd3/Uchl3/Pdk2/Grb2/Ywhag/Stxbp4/Socs2/Slc26a6/Slc26a6/Esrra/Cfl1/Plcb1	41
BP	GO:0090257	regulation of muscle system process	41/2387	232/21092	0.00253022	0.0285203	0.0225325	Tifab/Ptk2/Pak1/Lck/Mef2a/Agt/Jup/Col14a1/Arg2/Mef2c/Flna/Fdps/Agrn/Gsk3a/Fxyd1/Nppa/Trip10/Cav3/Gtf2i/Scn5a/Atp1b1/Cdk9/Ptgs1/Tead1/Kcne3/Adra1b/Gtf2ird1/Nfatc1/Pde5a/Camk2g/Errfi1/Grcc10/Arhgap42/Cacna1c/Rgs2/Wisp1/Gtf2ird2/Rhoa/Mrvi1/Atp1a1/Camk2d	41
BP	GO:0032273	positive regulation of protein polymerization	25/2387	123/21092	0.00256484	0.0288556	0.0227974	Rhobtb1/Pak1/Terf1/Dctn1/Baiap2/Nckap1l/Nck1/Cav3/Actr3b/Clip1/Rac1/Gmfg/Alox15/Gmfb/Rictor/Grb2/Pde4dip/Coro1a/Pfn1/Carmil1/Rhoa/Cdc42ep4/Psrc1/Nin/Icam1	25
BP	GO:0035303	regulation of dephosphorylation	31/2387	163/21092	0.0025755	0.0289207	0.0228488	Nuak1/Cnst/Knl1/Arpp19/Prkcd/Mprip/Mef2c/Nckap1l/Ppp2ca/Dlc1/Cep192/Cdca2/Ywhab/Ptprc/Itga1/Wnk1/Ppp1r35/Ppp1r1b/Ikbkb/Marf1/Zcchc9/Mastl/Wdr81/Mtmr2/Sppl3/Zfyve1/Sema4d/Gba/Pdgfrb/Vrk3/Camsap3	31
BP	GO:0006397	mRNA processing	70/2387	444/21092	0.00259143	0.0290446	0.0229467	Dhx9/Zc3h13/Dhx8/Mbnl1/Rbm5/Aurkaip1/Hnrnpc/Srpk3/Pnpt1/Luc7l/Ccnb1/Zcchc8/Syf2/Hnrnpll/Raly/Thrap3/Rnpc3/Rbm41/Pan3/Srrm2/Snrpe/Gemin8/Khsrp/Rbm17/Puf60/Srsf2/Sf3b3/Rnf20/Nudt21/Strap/Cdk9/Rbm38/Rbm39/Srpk2/U2af1l4/Hnrnpu/Hnrnpu/Ddx5/Hnrnpl/Fam172a/BC005624/Snw1/Zc3h14/Luc7l3/Lsm8/Ern1/Pqbp1/Sf3b1/Mettl3/Prpf4b/Srrm1/Sfswap/Rbm28/Pnn/Pabpc1/Fip1l1/Gemin6/Cpsf1/Cpsf6/Snrpb2/Rbm7/Srsf5/Snrnp70/Gcf…	70
BP	GO:0032874	positive regulation of stress-activated MAPK cascade	32/2387	170/21092	0.00262766	0.0293951	0.0232236	Dab2/Pak1/Spag9/Map4k1/Traf4/Map3k5/Eda2r/Map3k20/Ptpn1/Tnfrsf11a/Tlr3/Rassf2/Vangl2/Traf6/Lmnb1/Fcgr2b/Ager/Fgd2/Dab2ip/Epha4/Slamf1/Ern1/Prmt1/Syk/Tiam1/Map4k4/Mlkl/Tlr9/Dvl2/Mid1/Plcb1/Map3k10	32
BP	GO:0032615	interleukin-12 production	14/2387	55/21092	0.00265483	0.0295958	0.0233822	Nfkb1/Prkcd/Jak3/Tlr3/Traf6/Flt3/Ager/Pibf1/Mapk14/Slamf1/Tlr8/Acp5/Tlr9/Plcb1	14
BP	GO:0044782	cilium organization	54/2387	326/21092	0.00265558	0.0295958	0.0233822	Tbc1d30/Ift43/Mcidas/Sept10/Ttc8/Unc119b/Kctd17/Bbs10/Dctn1/Itprip/Map4/Ablim1/Kif3a/Flna/Hyls1/Stk36/C2cd3/Nudcd3/Stil/Cfap53/Alms1/Kif24/Cyld/Trove2/Vangl2/Wdr90/Ccno/Ttc17/Wdpcp/Nphp3/Ptpdc1/Tmem107/Ccdc103/Mark4/Ttll5/B9d2/Odf2l/Pibf1/Pqbp1/Cfap44/Tmem67/Dnah8/Nme7/Syne2/Sept8/Eno4/Sept3/Ehd1/Ehd1/Fam161a/Lrrc49/Ccdc28b/Tmem80/Cenpj	54
BP	GO:0097352	autophagosome maturation	10/2387	33/21092	0.00268621	0.029825	0.0235633	Clec16a/Ubqln4/Map1lc3b/Snapin/Vps16/Irgm1/Irgm1/Irgm1/Lamp2/Cln3	10
BP	GO:1905508	protein localization to microtubule organizing center	10/2387	33/21092	0.00268621	0.029825	0.0235633	Mcph1/Spag5/C2cd3/Nudcd3/Stil/Aurka/Cep192/Mark4/Pibf1/Hook3	10
BP	GO:0002822	regulation of adaptive immune response based on somatic recombination of immune receptors built from immunoglobulin superfamily domains	34/2387	184/21092	0.00270401	0.0299106	0.0236309	Ptpn6/Gata3/Nfkbiz/Pnp/Mef2c/Nsd2/Sash3/Cd1d2/Jak3/Clcf1/Clcf1/Rc3h2/Tnfrsf13c/Il20rb/Il33/H2-Ab1/H2-Q7/Tap2/Traf6/Ptprc/Fcer2a/Fcgr2b/Trp53bp1/Ager/Tnfsf13b/Pvr/Il18r1/Slamf1/Ccr2/Malt1/Il12a/Bcl6/H2-T23/Fcgr3	34
BP	GO:0006473	protein acetylation	34/2387	184/21092	0.00270401	0.0299106	0.0236309	Camk1/Ing3/Tmem179b/Brca1/Gata3/Mcrs1/Nat8f7/Arrb1/Esco2/Naa16/Flcn/Por/Prkaa1/Zfp451/Naa35/Terf2ip/Arntl/Nfe2/Brca2/Brd8/Naa60/Jade2/Ing4/Sirt3/Sin3a/Dr1/Epc1/Ncoa1/Klf15/Irf4/Actl6a/Rapgef3/Fam161a/Atg7	34
BP	GO:0048670	regulation of collateral sprouting	8/2387	23/21092	0.00272115	0.0299632	0.0236725	Ulk2/Bcl11a/Spg20/Ulk1/Rgma/Ifrd1/Bdnf/Sema4d	8
BP	GO:0055094	response to lipoprotein particle	8/2387	23/21092	0.00272115	0.0299632	0.0236725	Lpl/Pparg/Ticam1/Cd81/Cd9/Ldlr/Itgb2/Syk	8
BP	GO:0046620	regulation of organ growth	24/2387	117/21092	0.00272393	0.0299632	0.0236725	Ptk2/Pak1/Agt/Col14a1/Mef2c/Ccnb1/Ybx3/Sash3/Fdps/Gsk3a/Flvcr1/Tbx5/Trip10/Cav3/Por/Mapk14/Meis1/Cacna1c/Wnt2/Cdk1/Rgs2/Wisp1/Men1/Men1	24
BP	GO:0046579	positive regulation of Ras protein signal transduction	15/2387	61/21092	0.00273853	0.0299985	0.0237003	Mcf2l/Notch2/Arpp19/Csf1/F2rl3/Kras/Akap13/Arrb1/Col3a1/P2ry10/Map4k4/P2ry10b/Camk2d/Pdgfrb/F2rl2	15
BP	GO:0008154	actin polymerization or depolymerization	37/2387	205/21092	0.00275817	0.0299985	0.0237003	Eln/Rhobtb1/Prkcd/Cap1/Baiap2/Sh3bp1/Ppp1r9a/Cit/Nckap1l/Ssh3/Nck1/Fam107a/Diaph3/Tmod2/Ttc17/Plekhg2/Actr3b/Washc3/Twf2/Rac1/Tpm1/Gmfg/Alox15/Gmfb/Rictor/Capg/Grb2/Add1/Coro1a/Pfn1/Carmil1/Slit2/Cfl1/Rhoa/Cdc42ep4/Icam1/Pecam1	37
BP	GO:0021700	developmental maturation	52/2387	312/21092	0.00275975	0.0299985	0.0237003	Aldh1a2/Dlg4/Trip13/Nsun2/Nr4a2/Gata3/Ccnb1/Gdf11/Pparg/Nrcam/Trpc4ap/Bcl11a/Flvcr1/Nrxn1/Ankrd17/Myo5a/Aurka/Grb14/Phospho1/Slfn14/Slfn14/Slfn14/Slfn14/Snapin/Klf2/Fgfr3/Rflnb/Runx1/Shank1/Wnt10b/Psen2/Gpat4/Brca2/Epas1/Psen1/Tdrd5/Dab2ip/Rac1/Ctsl/Lhx6/Cdc20/Pfn1/Slc26a6/Slc26a6/Baiap3/Kdr/Rhoa/Plcb1/Rab3a/Rab3a/Sema4d/Fbxo5	52
BP	GO:0036465	synaptic vesicle recycling	17/2387	73/21092	0.00276154	0.0299985	0.0237003	Actg1/Itsn1/A830010M20Rik/Ston2/Pip5k1c/Sh3gl2/Actb/4932438A13Rik/Syt17/Dnm3/Ap1s2/Ap3b1/Rab3a/Rab3a/Syt7/Plaa/Ap2m1	17
BP	GO:0097327	response to antineoplastic agent	17/2387	73/21092	0.00276154	0.0299985	0.0237003	Eif4ebp1/Rad51/Map4k1/Jup/Brca1/Timeless/Blm/Ddx11/Prkaa1/Dhfr/Hnrnpu/Hnrnpu/Fibin/Cdk4/Atrx/Ddit4/Gba	17
BP	GO:0031668	cellular response to extracellular stimulus	38/2387	212/21092	0.00276255	0.0299985	0.0237003	Clec16a/Atf3/Glul/Pdk4/Nr4a2/Angptl4/Gabarap/Srebf2/Map3k5/Nprl3/Fam107a/Cdkn1a/Map1lc3b/Aes/Srebf1/Cadps2/Prkaa1/Klf10/Ptprc/Gck/Ulk1/Fas/Rnase4/Hnrnpl/Snw1/Postn/Rnf152/Pdk2/Lamp2/Folr2/Atf4/Zfyve1/Ncoa1/Gba/Higd1a/Pik3r4/Ehmt2/Atg7	38
BP	GO:0032388	positive regulation of intracellular transport	38/2387	212/21092	0.00276255	0.0299985	0.0237003	Dab2/Ect2/Tbc1d20/Dhx9/Camk1/Pak1/Prkcd/Jup/Brca1/Kif3a/Ipo5/Flna/Spag5/Tm9sf4/Prnp/Gsk3a/Hyal2/Nppa/Stom/Map2/Cacnb3/Prkaa1/Akap5/Cib1/Psen1/Mapk14/Rufy3/Sar1a/Mtmr2/Syk/Cdk1/Cpsf6/Commd1/Ehd1/Ehd1/Rapgef3/Kif20b/Syt7	38
BP	GO:0031116	positive regulation of microtubule polymerization	9/2387	28/21092	0.00277966	0.0301066	0.0237857	Pak1/Terf1/Dctn1/Cav3/Clip1/Rac1/Pde4dip/Psrc1/Nin	9
BP	GO:0006491	N-glycan processing	6/2387	14/21092	0.0027979	0.0301066	0.0237857	Man2a1/Gnptg/Man2a2/Man1b1/Man1a/St8sia4	6
BP	GO:0010885	regulation of cholesterol storage	6/2387	14/21092	0.0027979	0.0301066	0.0237857	Lpl/Nr1h2/Srebf2/Pparg/Ehd1/Ehd1	6
BP	GO:0045351	type I interferon biosynthetic process	6/2387	14/21092	0.0027979	0.0301066	0.0237857	Tlr3/Ticam1/Nmi/Tlr8/Tlr7/Tlr9	6
BP	GO:0090110	cargo loading into COPII-coated vesicle	6/2387	14/21092	0.0027979	0.0301066	0.0237857	Tbc1d20/Sec24c/Insig1/Sar1a/Sec13/Sec24a	6
BP	GO:0016571	histone methylation	27/2387	137/21092	0.00280888	0.03017	0.0238358	Wdr61/Rlf/Kdm4a/Prdm5/Brca1/Gata3/Nsd2/Myb/Dnmt1/Phf19/Satb1/Paxbp1/Rnf20/Tet2/Bcor/Pax5/Snw1/Prmt8/Atrx/Kdm4b/Prmt1/Hist1h1b/Men1/Men1/Prmt2/Ezh2/Ehmt2	27
BP	GO:0055013	cardiac muscle cell development	21/2387	98/21092	0.00282022	0.030237	0.0238888	Pak1/Mef2a/Agt/Col14a1/Fdps/Gsk3a/Akap13/Trip10/Cav3/Sorbs2/Sgcd/Popdc2/Hnrnpu/Hnrnpu/Adra1b/Myh11/Rgs2/Wisp1/Camk2d/Pdgfrb/Atg7	21
BP	GO:0090287	regulation of cellular response to growth factor stimulus	46/2387	269/21092	0.00282805	0.0302663	0.0239119	Dab2/Smurf1/Peg10/Got1/Fkbp8/Notch2/Agt/Gata3/Kcp/Cav2/Prkcb/Itga3/Nrxn1/Fbn1/Flcn/Ptpn1/Cav3/Ube2o/Ltbp1/Sox11/Spg20/Nedd4/Strap/Zfp451/Chst11/Ulk1/Dll1/Ptp4a3/Htra1/Fgfbp1/Pmepa1/Snw1/Dab2ip/Rgma/Nrros/Vegfb/Sulf1/Htra3/Slit2/Zeb1/Abl1/Twsg1/Men1/Men1/Kdr/Sema6a	46
BP	GO:0006183	GTP biosynthetic process	5/2387	10/21092	0.00285186	0.0303567	0.0239833	Nme6/Pnp/Nme2/Nme7/Impdh1	5
BP	GO:0072710	response to hydroxyurea	5/2387	10/21092	0.00285186	0.0303567	0.0239833	Rad51/Timeless/Blm/Ddx11/Atrx	5
BP	GO:1990535	neuron projection maintenance	5/2387	10/21092	0.00285186	0.0303567	0.0239833	Dctn1/Prnp/Insr/Psen1/Map1a	5
BP	GO:0032092	positive regulation of protein binding	23/2387	111/21092	0.00288528	0.0306487	0.024214	Spon1/Nmd3/Pkd1/Mef2c/Traf4/Agrn/Ppp2ca/Epb41/Crbn/Arrb1/Map1lc3b/Ticam1/Hoxa3/Psen1/Epha4/Trib3/Sppl3/Tiam1/Add1/Bdnf/Abl1/Men1/Men1	23
BP	GO:0070304	positive regulation of stress-activated protein kinase signaling cascade	32/2387	171/21092	0.00288963	0.0306487	0.024214	Dab2/Pak1/Spag9/Map4k1/Traf4/Map3k5/Eda2r/Map3k20/Ptpn1/Tnfrsf11a/Tlr3/Rassf2/Vangl2/Traf6/Lmnb1/Fcgr2b/Ager/Fgd2/Dab2ip/Epha4/Slamf1/Ern1/Prmt1/Syk/Tiam1/Map4k4/Mlkl/Tlr9/Dvl2/Mid1/Plcb1/Map3k10	32
BP	GO:0002831	regulation of response to biotic stimulus	28/2387	144/21092	0.0029084	0.0307425	0.0242882	Apobec3/Dhx9/Stat1/Cd180/Spink5/Arg2/Prdm1/Klrk1/Lrsam1/Ankrd17/Traf6/Pcbp2/Htra1/Pvr/Trib1/Pum1/Pum1/Pml/Pqbp1/Gbp4/Sin3a/Traf3/Il12a/Cd37/Zc3hav1/Ulbp1/Ulbp1/Aim2	28
BP	GO:0032103	positive regulation of response to external stimulus	49/2387	291/21092	0.00290885	0.0307425	0.0242882	Stap1/Dhx9/Cd180/Csf1/Nfkbiz/Fn1/Cxcr3/Nckap1l/Stx3/Ets1/Hyal2/Nppa/Lrsam1/Ankrd17/Il33/Tnfrsf11a/Tlr3/Ednra/Mospd2/Traf6/Ticam1/Wnk1/Egfr/Ffar2/Ager/Snw1/Rac1/Dysf/Mapk14/Pum1/Pum1/Slamf1/Ccr2/Pde5a/Gbp5/Ldlr/Vegfb/Ccl4/Tiam1/Ccr5/Il12a/Cd74/Slit2/Tlr9/Kdr/Zc3hav1/Fcgr3/C5ar1/Pdgfrb	49
BP	GO:0043900	regulation of multi-organism process	63/2387	394/21092	0.00295483	0.0311729	0.0246282	Pglyrp1/Apobec3/Tbc1d20/Dhx9/Cnot7/Stat1/Cd180/Hpgds/Spink5/Mid2/Arg2/Chmp4b/Cav2/Trim21/Scd1/Top2a/Prdm1/Ptx3/Snf8/Lrsam1/Ankrd17/Stom/Aurka/Grb14/Traf6/Trim59/Chd1/Fcer2a/Cib1/Pcbp2/Hacd3/Srpk2/Sqstm1/Ppib/Htra1/Mbl1/Ddx5/Snw1/Trib1/Pum1/Pum1/Cfap69/Pde5a/Pml/Pqbp1/Gbp4/Prf1/Sin3a/Ccl4/Traf3/Ccr5/Pabpc1/Pfn1/Cd37/Cd74/Cfl1/Zc3hav1/Lhfpl2/Oasl2/Smc3/Plcb1/Aim2/Zfp36	63
BP	GO:1902905	positive regulation of supramolecular fiber organization	35/2387	192/21092	0.00298292	0.0313938	0.0248027	Rhobtb1/Pak1/Terf1/Dctn1/Baiap2/Flna/Nckap1l/Nck1/Cav3/Wnt11/Pxn/Actr3b/Psen1/Clip1/Rac1/Tpm1/Gmfg/Alox15/Gmfb/Rictor/Grb2/Pde4dip/Synpo/Coro1a/Pfn1/Carmil1/Abl1/Cfl1/Rapgef3/Rhoa/Nf2/Cdc42ep4/Psrc1/Nin/Icam1	35
BP	GO:0072522	purine-containing compound biosynthetic process	40/2387	227/21092	0.00298636	0.0313938	0.0248027	Pkm/Nme6/Guk1/Atp5k/Pdk4/Zbtb20/Pfkp/Mthfd1/Pnp/Pfkfb2/Atp5g3/Surf1/Papss1/Nppa/Insr/Flcn/Nme2/Mthfd1l/Adcy3/Prkaa1/Eif6/Khk/Gck/Ncor1/Nt5e/Aprt/Adssl1/Atp5j2/Atp5b/Pdk2/Nme7/Ddit4/Atp5a1/Atp5a1/Eno4/Adcy4/Impdh1/Sirt6/Oasl2/Cbfa2t3	40
BP	GO:0030522	intracellular receptor signaling pathway	37/2387	206/21092	0.00300385	0.0315218	0.0249038	Dab2/Ufm1/Aldh1a2/Pak1/Nr1h2/Ncoa2/Brca1/Kdm5d/Pparg/Zfp366/Skp2/Skp2/Thrap3/Ankrd17/Arid1a/Med12/Peli3/Ncor1/Arntl/Nr3c2/Ddx5/Snw1/Pum1/Pum1/Alox15/Calcoco1/Pml/Cyp26b1/Bdnf/Ncoa1/Trip4/Rhoa/Zc3hav1/Prmt2/Safb/Ezh2/Klf9	37
BP	GO:0099518	vesicle cytoskeletal trafficking	13/2387	50/21092	0.00304409	0.0318876	0.0251928	Kif23/Madd/Dtnbp1/Myo5a/Map2/Snapin/Kif1a/Myrip/Kifc1/Kif1b/Cln3/Nde1/Ap3b1	13
BP	GO:0007229	integrin-mediated signaling pathway	19/2387	86/21092	0.00305336	0.0319284	0.025225	Dab2/Ptk2/Itga10/Fyb/Flna/Itga3/Col3a1/Nme2/Itgb8/Pxn/Itga1/Itgae/Lims2/Itgb2/Syk/Abl1/Fermt3/Rhoa/Zyx	19
BP	GO:0051346	negative regulation of hydrolase activity	63/2387	395/21092	0.00313652	0.0326111	0.0257645	Cd44/F11r/Cnst/Fcmr/Ttc8/Knl1/Serpina3i/Terf1/Spink5/Kdm5a/Stfa2/Stfa2/Agt/Mprip/Serpinh1/Fabp1/Angptl4/Klrk1/A2m/Usp47/Nckap1l/Agrn/Ptx3/Serpinb8/Wfdc12/Wfdc8/Arrb1/Timp3/Map2/Lamtor5/Cep192/Por/Serpina3c/Wnk1/Vcpkmt/Gpsm1/Ecm1/Pxk/Ppp1r35/Dab2ip/Ppp1r1b/Ikbkb/Marf1/Zcchc9/Serping1/Mastl/Stfa1/Wdr81/Atpif1/Ppif/Zfyve1/Birc5/Sort1/Naip2/Dpep1/Rgs2/Abl1/Tlr9/Rps6ka3/Cdkn2d/Sema4d/Pecam1/Camsap3	63
BP	GO:0006687	glycosphingolipid metabolic process	11/2387	39/21092	0.00314066	0.0326111	0.0257645	Crem/Prkcd/Itgb8/Neu1/A3galt2/B4galt3/B4galt6/Neu3/Cln3/St8sia4/Gba	11
BP	GO:0021955	central nervous system neuron axonogenesis	11/2387	39/21092	0.00314066	0.0326111	0.0257645	Ptk2/Nr4a2/Ephb3/Tsku/Nfib/Arhgef28/Epha4/Grcc10/Slit2/Nin/Atg7	11
BP	GO:2000772	regulation of cellular senescence	11/2387	39/21092	0.00314066	0.0326111	0.0257645	Nuak1/Arg2/Rbl1/Pnpt1/Kras/Rsl1d1/Arntl/Abl1/Bcl6/Ypel3/Fbxo5	11
BP	GO:0051348	negative regulation of transferase activity	43/2387	249/21092	0.00315593	0.0327124	0.0258445	Ptpn6/Spred2/Terf1/Casp3/Plk1/Prkcd/Mcrs1/Stk38/Mvp/Cdkn2c/Pparg/Dtnbp1/Gsk3a/Cdkn1a/Hyal2/Ptpn1/Pik3ip1/Cav3/Sh3bp5/Ptprc/Wnk1/Ajuba/Psen2/Fgfr1op/Hnrnpu/Hnrnpu/Psen1/Parp3/Dab2ip/Trib3/Trib1/Pml/Errfi1/Actb/Rgs2/Abl1/Men1/Men1/Nf2/Fbxo7/Gba/Fbxo5/Zfp36	43
BP	GO:0006606	protein import into nucleus	32/2387	172/21092	0.00317359	0.0328381	0.0259437	Ect2/Ranbp2/Nxt1/Txnip/Prkcd/Agt/Jup/Brca1/Ipo5/Flna/Ipo9/Ppp2ca/Ipo11/Cdkn1a/Hyal2/Nup85/Nxt2/Cep57/Akap5/Nup54/Arntl/Ddx5/Psen1/Ipo8/Mapk14/Pml/Gbp4/Syk/Cdk1/Kpna2/Cfl1/Bcl6	32
BP	GO:0051054	positive regulation of DNA metabolic process	42/2387	242/21092	0.00318661	0.0329154	0.0260048	Dhx9/Rad51/Igfbp3/E2f8/Ube2n/Prkcd/Brca1/Pnp/Nsd2/Timeless/Wiz/Babam2/Clcf1/Clcf1/Foxm1/Dnmt1/Gnl3/Blm/Mms19/Dna2/Ddx11/Abraxas1/Rfc5/Ptprc/Trp53bp1/Ino80/Egfr/Parp3/Rac1/Cct2/Pml/Atrx/Atr/E2f7/Aurkb/Pfn1/Cdk1/Tcp1/Sirt6/Cdt1/Dbf4/Pdgfrb	42
BP	GO:2001238	positive regulation of extrinsic apoptotic signaling pathway	15/2387	62/21092	0.00324161	0.0333934	0.0263825	Atf3/Agt/Tnfsf10/Jak3/Hyal2/Siglec1/Cyld/Timp3/Rbck1/Ptprc/Fas/Psen2/Htra2/Pml/Pidd1	15
BP	GO:0050771	negative regulation of axonogenesis	16/2387	68/21092	0.00324978	0.0333934	0.0263825	Ptk2/Sema3a/Ulk2/Bcl11a/Map2/Spg20/Ulk1/Psen1/Rgma/Rufy3/Ifrd1/Ccr5/Slit2/Sema4d/Sema3f/Sema6a	16
BP	GO:0051057	positive regulation of small GTPase mediated signal transduction	16/2387	68/21092	0.00324978	0.0333934	0.0263825	Mcf2l/Notch2/Arpp19/Csf1/F2rl3/Kras/Akap13/Arrb1/Col3a1/P2ry10/Cdon/Map4k4/P2ry10b/Camk2d/Pdgfrb/F2rl2	16
BP	GO:0043281	regulation of cysteine-type endopeptidase activity involved in apoptotic process	37/2387	207/21092	0.00326806	0.0334652	0.0264392	Cd44/Fcmr/Lck/Stat1/Gramd4/Fabp1/Ifi27/Tnfsf10/Usp47/Nlrp1a/Nlrp1a/Nlrp1a/Nlrp1a/Pparg/Map3k5/Ppp2ca/Dlc1/Arrb1/Casp8ap2/Lamtor5/Por/Tnfsf15/Acer2/Hip1/Fas/Htra2/Pml/Senp1/Birc5/Naip2/Dpep1/Men1/Men1/Rps6ka3/Cdkn2d/Pidd1/Rhoa	37
BP	GO:0060047	heart contraction	37/2387	207/21092	0.00326806	0.0334652	0.0264392	Kcnh2/Mef2a/Sema3a/Adm/Uty/Agt/Jup/Flna/Hopx/Agrn/Gsk3a/Fxyd1/Nppa/Cav3/Srebf1/Trdn/Cacna1d/Scn5a/Atp1b1/Myl4/Sgcd/Slc1a1/Psen2/Popdc2/Epas1/Kcne3/Adra1b/Tpm1/Pde5a/Vegfb/Cacna1c/Hrc/Rgs2/Map2k6/Atp1a1/Camk2d/Mdm4	37
BP	GO:0002699	positive regulation of immune effector process	43/2387	250/21092	0.00340399	0.0347371	0.0274441	Gata3/Nfkbiz/Pnp/Nsd2/Sash3/Klrk1/Cd1d2/Myb/Clcf1/Clcf1/Klrb1c/Nppa/Ankrd17/Il33/H2-Q7/Tap2/Traf6/Ticam1/Ptprc/Fcer2a/H60c/Spon2/Trp53bp1/Tnfrsf4/Ffar2/Pvr/Mapk14/Pum1/Pum1/Il18r1/Ccr2/Itgb2/Syk/Malt1/Il12a/Cd37/Cd74/Tlr9/H2-T23/Zc3hav1/Ulbp1/Ulbp1/Fcgr3	43
BP	GO:0034330	cell junction organization	43/2387	250/21092	0.00340399	0.0347371	0.0274441	Pard3/Ect2/Ptk2/Agt/Jup/Kifc3/Fn1/Flna/Sh3bp1/Nphp1/Lsr/Cgn/Pkp4/Fam107a/Dlc1/Flcn/Wnt11/Pxn/Ctnnd1/Ctnnd1/Gnpat/Wdpcp/Lama3/Ajuba/Prkch/Afdn/Cd9/Rac1/Ikbkb/Epb41l3/Lims2/Phldb2/Add1/Snai1/Map4k4/Gjc1/Vmp1/Abl1/Cfl1/Kdr/Rhoa/Nf2/Camsap3	43
BP	GO:1900087	positive regulation of G1/S transition of mitotic cell cycle	10/2387	34/21092	0.00342526	0.0348941	0.0275681	Ccnd1/Mtbp/Ankrd17/Cyp1a1/Ube2e2/Hyal1/Ccnd3/Larp7/Plcb1/Dbf4	10
BP	GO:0051770	positive regulation of nitric-oxide synthase biosynthetic process	7/2387	19/21092	0.00345786	0.0350955	0.0277272	Fnta/Stat1/Jak3/Fcer2a/Tlr9/Map2k6/Kdr	7
BP	GO:0045910	negative regulation of DNA recombination	12/2387	45/21092	0.00346279	0.0350955	0.0277272	Lig3/Msh3/Parpbp/Hist1h1a/Blm/Terf2ip/Trp53bp1/Ankle1/Polq/Rmi2/Hist1h1b/Bcl6	12
BP	GO:0061647	histone H3-K9 modification	12/2387	45/21092	0.00346279	0.0350955	0.0277272	Kdm4a/Prdm5/Brca1/Gata3/Myb/Dnmt1/Zfp451/Pax5/Atrx/Kdm4b/Hist1h1b/Ehmt2	12
BP	GO:0051492	regulation of stress fiber assembly	19/2387	87/21092	0.00350063	0.0353677	0.0279423	Pak1/Ttc8/Arap1/Ppp1r9a/Tacstd2/Dlc1/Alms1/Wnt11/Pxn/Rac1/Tpm1/Phldb2/Synpo/Pfn1/Carmil1/Abl1/Rapgef3/Rhoa/Nf2	19
BP	GO:0071826	ribonucleoprotein complex subunit organization	40/2387	229/21092	0.00350158	0.0353677	0.0279423	Dhx30/Dhx9/Atxn2/Cnot7/Dhx8/Mbnl1/Rbm5/Eif5/Srpk3/Luc7l/Eif2s3y/Znhit6/Rpf1/Rpsa/Pan3/Snrpe/Gemin8/Nudt21/Strap/Prkaa1/Eif6/Srpk2/Tdrd5/Ogfod1/Luc7l3/Rps25/Pqbp1/Ago1/Sf3b1/Mrps11/Eif3d/Atr/Sfswap/Gemin6/Cpsf6/Mterf4/Rpl38/Gcfc2/Snrpb/Psip1	40
BP	GO:1903320	regulation of protein modification by small protein conjugation or removal	39/2387	222/21092	0.0035244	0.0355377	0.0280766	Chfr/Rchy1/Plk1/Ube2n/Brca1/Trim21/Rassf1/Gsk3a/Skp2/Skp2/Mtbp/Gnl3/Fam107a/Arrb1/Tollip/Dnajb2/Rnf20/Peli3/Ticam1/Fgfr3/Cdk9/Fanci/Nhlrc1/Nmi/Psen2/Psen1/Dysf/Trib3/Trib1/Mastl/Gbp4/Kdm2a/Cdc20/Commd1/Abl1/Plaa/Hdac8/Fbxo5/Atg7	39
BP	GO:0002793	positive regulation of peptide secretion	53/2387	323/21092	0.00353294	0.0355634	0.0280969	Lpl/Dhx9/Golph3/Chuk/Glul/Nr1h2/Agt/Gata3/Ncl/Pfkfb2/Nlrp1a/Nlrp1a/Nlrp1a/Nlrp1a/Clec9a/Exoc1/Ang/Clcf1/Clcf1/Itsn1/Arrb1/Hyal2/Zfp384/Il33/Cacna1d/Flt3/Doc2b/Gck/Tnfsf15/Oxct1/Myrip/Usp50/Mmp13/Tnfrsf4/Ano1/Egfr/Ffar2/Mapk14/Postn/Slamf1/Sirt3/Tlr8/Syk/Ccr5/Baiap3/Abl1/Wls/H2-T23/Sec24a/Glmn/Blk/Aim2/Atg7	53
BP	GO:0003015	heart process	38/2387	215/21092	0.0035414	0.0355881	0.0281164	Kcnh2/Mef2a/Sema3a/Adm/Uty/Agt/Jup/Flna/Hopx/Agrn/Gsk3a/Akap13/Fxyd1/Nppa/Cav3/Srebf1/Trdn/Cacna1d/Scn5a/Atp1b1/Myl4/Sgcd/Slc1a1/Psen2/Popdc2/Epas1/Kcne3/Adra1b/Tpm1/Pde5a/Vegfb/Cacna1c/Hrc/Rgs2/Map2k6/Atp1a1/Camk2d/Mdm4	38
BP	GO:0030218	erythrocyte differentiation	25/2387	126/21092	0.00358965	0.0360119	0.0284512	Stat1/Casp3/Gata3/Jak3/Sfxn1/Nckap1l/Flvcr1/Ets1/Dnase2a/Klf2/Ncapg2/Hbb-b1/Ncor1/Epas1/Mapk14/Senp1/Hba-a1/Prmt1/Add1/Atpif1/Bcl6/Heph/Plcb1/Zfp36/Rhag	25
BP	GO:0043242	negative regulation of protein complex disassembly	18/2387	81/21092	0.00362604	0.0363155	0.0286911	Clec16a/Ubqln4/Hdgfl3/Map2/Tmod2/Cib1/Ckap2/Twf2/Hdac6/Dysf/Tpm1/Capg/Add1/Carmil1/Cfl1/Mid1/Map1a/Camsap3	18
BP	GO:0007064	mitotic sister chromatid cohesion	8/2387	24/21092	0.00368179	0.0368117	0.0290831	Pttg1/Smc5/Haspin/Atrx/Cdc20/Sgo1/Pds5a/Cdca5	8
BP	GO:0072330	monocarboxylic acid biosynthetic process	42/2387	244/21092	0.00371225	0.0369959	0.0292287	Lpl/Aldh1a2/Pkm/Pdk4/Zbtb20/Hpgds/Nr1h2/Agt/Pfkp/Brca1/Scd1/Pfkfb2/Insr/Pla2g1b/Myo5a/H2-Ke6/Srebf1/Cyp1a1/Prkaa1/Eif6/Khk/Gck/Ncor1/Hacd3/Ptgs1/Tbxas1/Srr/Pex2/Trib3/Pibf1/Alox15/Insig1/Ldhb/Ddit4/Eno4/Cd74/Star/Sirt6/Acot11/Kmo/Cbfa2t3/Lpgat1	42
BP	GO:0006733	oxidoreduction coenzyme metabolic process	30/2387	160/21092	0.00371894	0.0369959	0.0292287	Pkm/Zbtb20/Idh3b/Pfkp/Pfkfb2/Coq7/Cbr2/Insr/Hsd11b1/Prkaa1/Eif6/Khk/Gck/Ncor1/Coq4/Idh3g/Nnt/Nnt/Coq8b/H6pd/Ldhb/Ddit4/Eno4/Dlst/Pdss2/Haao/Sirt6/Kynu/Kmo/Cbfa2t3	30
BP	GO:0030705	cytoskeleton-dependent intracellular transport	30/2387	160/21092	0.00371894	0.0369959	0.0292287	Kif23/Ift43/Spg7/Dctn1/Kif3a/Madd/Dtnbp1/Hook1/Spast/Stau2/Myo5a/Map2/Snapin/Kif1a/Myrip/Hnrnpu/Hnrnpu/Kifc1/Hook3/Kif1b/Sun2/Cln3/Nme7/Syne2/Map6/Nde1/Ap3b1/Copg2/Map1a/Camsap3	30
BP	GO:2000116	regulation of cysteine-type endopeptidase activity	40/2387	230/21092	0.00378654	0.0376053	0.0297101	Cd44/Fcmr/Lck/Stat1/Gramd4/Fabp1/Ifi27/Tnfsf10/Usp47/Nlrp1a/Nlrp1a/Nlrp1a/Nlrp1a/Pparg/Map3k5/Ppp2ca/Dlc1/Arrb1/Casp8ap2/Lamtor5/Por/Tnfsf15/Acer2/Hip1/Fas/Usp50/Htra2/Pml/Tbc1d10a/Senp1/Birc5/Naip2/Dpep1/Men1/Men1/Rps6ka3/Cdkn2d/Pidd1/Rhoa/Aim2	40
BP	GO:0050868	negative regulation of T cell activation	24/2387	120/21092	0.00383893	0.0380051	0.030026	Cd44/Ptpn6/Slfn1/Slfn1/Slfn1/Slfn1/Casp3/Zc3h12d/Arg2/Jak3/Btla/Prnp/Rc3h2/Il20rb/Cyld/H2-Ab1/Runx1/Tmem131l/Pde5a/H2-Aa/Cd74/Twsg1/Bcl6/Glmn	24
BP	GO:0022618	ribonucleoprotein complex assembly	38/2387	216/21092	0.00383961	0.0380051	0.030026	Dhx30/Dhx9/Atxn2/Cnot7/Mbnl1/Rbm5/Eif5/Srpk3/Luc7l/Eif2s3y/Znhit6/Rpf1/Rpsa/Pan3/Snrpe/Gemin8/Nudt21/Strap/Prkaa1/Eif6/Srpk2/Ogfod1/Luc7l3/Rps25/Pqbp1/Ago1/Sf3b1/Mrps11/Eif3d/Atr/Sfswap/Gemin6/Cpsf6/Mterf4/Rpl38/Gcfc2/Snrpb/Psip1	38
BP	GO:0009152	purine ribonucleotide biosynthetic process	36/2387	202/21092	0.00386609	0.0382034	0.0301826	Pkm/Nme6/Guk1/Atp5k/Pdk4/Zbtb20/Pfkp/Pnp/Pfkfb2/Atp5g3/Surf1/Papss1/Nppa/Insr/Flcn/Nme2/Adcy3/Prkaa1/Eif6/Khk/Gck/Ncor1/Aprt/Adssl1/Atp5j2/Atp5b/Pdk2/Nme7/Ddit4/Atp5a1/Atp5a1/Eno4/Adcy4/Impdh1/Sirt6/Cbfa2t3	36
BP	GO:0009205	purine ribonucleoside triphosphate metabolic process	43/2387	252/21092	0.00395065	0.0389741	0.0307915	Ndufa7/Pkm/Nme6/Guk1/Atp5k/Zbtb20/Pfkp/Pnp/Ccnb1/Pfkfb2/Atp5g3/Surf1/Coq7/Insr/Flcn/Nme2/Ndufs1/Prkaa1/Atp1b1/Eif6/Khk/Mocs1/Gck/Ncor1/Cox5a/Rhoq/Uqcrh/Atp5j2/Atp5b/Nme7/Ddit4/Atpif1/Atp5a1/Atp5a1/Bdnf/Ppif/Eno4/Cdk1/Impdh1/Sirt6/Rhoa/Tefm/Cbfa2t3	43
BP	GO:1903313	positive regulation of mRNA metabolic process	19/2387	88/21092	0.00400099	0.0394051	0.0311321	Cnot7/Cnot8/Zc3h12d/Pnpt1/Ccnb1/Hnrnpr/Thrap3/Nanos1/Khsrp/Nudt21/Snw1/Pum1/Pum1/Tnrc6c/Mettl3/Pabpc1/Snrnp70/Zc3hav1/Zfp36	19
BP	GO:0031330	negative regulation of cellular catabolic process	41/2387	238/21092	0.00404879	0.0397925	0.0314381	Dhx9/Ptk2/Clec16a/Kdm4a/Eif4g2/Lrpprc/Ubqln4/Atraid/Qsox1/Hnrnpc/Chmp4b/Thrap3/Timp3/Usp14/Fam192a/Dhx34/Usp30/Rbm38/Psen2/Hnrnpu/Hnrnpu/Psen1/Adra1b/Dab2ip/Epha4/E2f1/Htra2/Pml/Senp1/Mtmr2/Etfbkmt/Scfd1/Ddit4/Pabpc1/Tlk2/Sirt6/Cbfa2t3/Map1a/Ehmt2/Zfp36/Atg7	41
BP	GO:1901293	nucleoside phosphate biosynthetic process	46/2387	274/21092	0.00405375	0.0397925	0.0314381	Pkm/Nme6/Guk1/Atp5k/Pdk4/Zbtb20/Pfkp/Mthfd1/Pnp/Pfkfb2/Atp5g3/Surf1/Papss1/Rrm2/Hddc2/Rrm1/Nppa/Insr/Flcn/Nme2/Tyms/Adcy3/Prkaa1/Eif6/Khk/Gck/Ncor1/Aprt/Adssl1/Atp5j2/Atp5b/Pdk2/Gars/Nme7/Ddit4/Atp5a1/Atp5a1/Eno4/Adcy4/Impdh1/Haao/Sirt6/Kynu/Oasl2/Kmo/Cbfa2t3	46
BP	GO:0000187	activation of MAPK activity	23/2387	114/21092	0.00409772	0.0400254	0.0316221	Dab2/Spag9/Iqgap3/Map4k1/Madd/Map3k5/Arrb1/Insr/Map3k20/Pla2g1b/Ptpn1/Plce1/Pxn/Cd81/Ptprc/Itga1/Dab2ip/Ern1/Syk/Mlkl/Cd74/Map2k6/Map3k10	23
BP	GO:0010508	positive regulation of autophagy	23/2387	114/21092	0.00409772	0.0400254	0.0316221	Clec16a/Smurf1/Mid2/Trim21/Lrsam1/Flcn/Prkaa1/Ticam1/Gpsm1/Ulk1/Irgm1/Irgm1/Irgm1/Ager/Hdac6/Rnf152/Rab3gap1/Atpif1/Tlr9/Kdr/Fbxo7/Gba/Atg7	23
BP	GO:0030518	intracellular steroid hormone receptor signaling pathway	23/2387	114/21092	0.00409772	0.0400254	0.0316221	Dab2/Ufm1/Pak1/Ncoa2/Brca1/Kdm5d/Zfp366/Skp2/Skp2/Thrap3/Arid1a/Med12/Ncor1/Arntl/Nr3c2/Ddx5/Calcoco1/Bdnf/Trip4/Rhoa/Prmt2/Safb/Klf9	23
BP	GO:0055017	cardiac muscle tissue growth	21/2387	101/21092	0.00410995	0.0400787	0.0316642	Pak1/Agt/Col14a1/Mef2c/Ccnb1/Fdps/Gsk3a/Akap13/Tbx5/Trip10/Cav3/Sorbs2/Adra1b/Mapk14/Meis1/Wnt2/Cdk1/Rgs2/Wisp1/Sirt6/Camk2d	21
BP	GO:0001909	leukocyte mediated cytotoxicity	26/2387	134/21092	0.00413767	0.0402828	0.0318255	Stap1/Ptpn6/Lyst/Tsta3/Pnp/Klrb1b/Ctsh/Klrk1/Cd1d2/Prdx1/Klrb1c/Gzmb/H2-Q7/Tap2/Ptprc/H60c/Ager/Pvr/Prf1/Coro1a/Il12a/H2-T23/Ulbp1/Ulbp1/Fcgr3/Rab27a	26
BP	GO:0030258	lipid modification	38/2387	217/21092	0.00415898	0.0403539	0.0318816	Echdc2/Etfdh/Acoxl/Pdk4/Agt/Fabp1/Cyp3a13/Scd1/Acaa1a/Pparg/Ip6k1/Dgkz/Plpp1/Dgat1/Acad11/Por/Cyp1a1/A3galt2/Prkaa1/Acox1/Ggta1/Plpp5/Ttc7/Pex2/Mapk14/Inpp5f/Smg1/Inpp5j/Soat1/Mtmr2/Etfbkmt/Hadha/Socs2/Hadhb/Acads/Acox2/Lamtor1/Etfa	38
BP	GO:0048524	positive regulation of viral process	18/2387	82/21092	0.00416481	0.0403539	0.0318816	Tbc1d20/Dhx9/Cnot7/Chmp4b/Cav2/Trim21/Top2a/Stom/Chd1/Hacd3/Srpk2/Ppib/Snw1/Pabpc1/Pfn1/Cd74/Cfl1/Smc3	18
BP	GO:0006479	protein methylation	32/2387	175/21092	0.0041722	0.0403539	0.0318816	Wdr61/Rlf/Kdm4a/Prdm5/Brca1/Gata3/Nsd2/Myb/Dnmt1/Phf19/Satb1/Paxbp1/Rnf20/Tet2/Vcpkmt/Bcor/Pax5/Snw1/Prmt8/Atrx/Kdm4b/Etfbkmt/Prmt1/Eef2kmt/Hist1h1b/Irf4/Men1/Men1/Prmt2/Snrpb/Ezh2/Ehmt2	32
BP	GO:0008213	protein alkylation	32/2387	175/21092	0.0041722	0.0403539	0.0318816	Wdr61/Rlf/Kdm4a/Prdm5/Brca1/Gata3/Nsd2/Myb/Dnmt1/Phf19/Satb1/Paxbp1/Rnf20/Tet2/Vcpkmt/Bcor/Pax5/Snw1/Prmt8/Atrx/Kdm4b/Etfbkmt/Prmt1/Eef2kmt/Hist1h1b/Irf4/Men1/Men1/Prmt2/Snrpb/Ezh2/Ehmt2	32
BP	GO:0009746	response to hexose	33/2387	182/21092	0.00419519	0.0404237	0.0319367	Glul/Sidt2/Zbtb20/Casp3/Pfkfb2/Pde8b/Ppp2ca/Arrb1/Nrxn1/Ildr2/Srebf1/Cacna1d/Prkaa1/Khk/Gck/Oxct1/Hmgn3/Ano1/Ager/Ucp2/Ern1/Pde4c/Pde4c/Sin3a/Stxbp4/Tiam1/Map4k4/Birc5/Slc26a6/Slc26a6/Baiap3/Icam1/Atg7	33
BP	GO:0032869	cellular response to insulin stimulus	33/2387	182/21092	0.00419519	0.0404237	0.0319367	Pkm/Eif4ebp1/Pak1/Stat1/Pdk4/Prkcd/Cav2/Prkcb/Pparg/Gsk3a/Nck1/Insr/Pla2g1b/Myo5a/Ptpn1/Grb14/Lpin3/Srebf1/Ptpra/Gck/Lpin2/Rhoq/Trib3/Cdk4/Ccnd3/Uchl3/Pdk2/Grb2/Ywhag/Stxbp4/Socs2/Esrra/Plcb1	33
BP	GO:0060147	regulation of posttranscriptional gene silencing	12/2387	46/21092	0.00421118	0.0404237	0.0319367	Dhx9/Nfkb1/Wtip/Pparg/Ncor1/Ajuba/Ddx5/Egfr/Pum1/Pum1/Tnrc6c/Zfp36	12
BP	GO:0060966	regulation of gene silencing by RNA	12/2387	46/21092	0.00421118	0.0404237	0.0319367	Dhx9/Nfkb1/Wtip/Pparg/Ncor1/Ajuba/Ddx5/Egfr/Pum1/Pum1/Tnrc6c/Zfp36	12
BP	GO:0050855	regulation of B cell receptor signaling pathway	6/2387	15/21092	0.00422031	0.0404237	0.0319367	Stap1/Ptpn6/Prkcb/Ptprc/Prkch/Gcsam	6
BP	GO:0051782	negative regulation of cell division	6/2387	15/21092	0.00422031	0.0404237	0.0319367	Txnip/E2f8/Blm/Orc6/Aspm/E2f7	6
BP	GO:0009142	nucleoside triphosphate biosynthetic process	27/2387	141/21092	0.00425367	0.0406119	0.0320855	Pkm/Nme6/Atp5k/Zbtb20/Pfkp/Pnp/Pfkfb2/Atp5g3/Surf1/Insr/Flcn/Nme2/Prkaa1/Eif6/Khk/Gck/Ncor1/Atp5j2/Atp5b/Nme7/Ddit4/Atp5a1/Atp5a1/Eno4/Impdh1/Sirt6/Cbfa2t3	27
BP	GO:0071326	cellular response to monosaccharide stimulus	27/2387	141/21092	0.00425367	0.0406119	0.0320855	Sidt2/Zbtb20/Pde8b/Ppp2ca/Arrb1/Nrxn1/Cacna1d/Prkaa1/Oxct1/Hmgn3/Ano1/Ager/Ucp2/Ern1/Pde4c/Pde4c/Sin3a/Stxbp4/Tiam1/Map4k4/Birc5/Slc26a6/Slc26a6/Baiap3/Plcb1/Icam1/Atg7	27
BP	GO:0043401	steroid hormone mediated signaling pathway	24/2387	121/21092	0.00428661	0.0407951	0.0322302	Dab2/Ufm1/Pak1/Ncoa2/Brca1/Kdm5d/Zfp366/Skp2/Skp2/Akap13/Thrap3/Arid1a/Med12/Ncor1/Arntl/Nr3c2/Ddx5/Calcoco1/Bdnf/Trip4/Rhoa/Prmt2/Safb/Klf9	24
BP	GO:0060048	cardiac muscle contraction	24/2387	121/21092	0.00428661	0.0407951	0.0322302	Kcnh2/Uty/Jup/Flna/Agrn/Fxyd1/Nppa/Cav3/Cacna1d/Scn5a/Atp1b1/Myl4/Sgcd/Psen2/Kcne3/Adra1b/Tpm1/Pde5a/Vegfb/Cacna1c/Rgs2/Map2k6/Atp1a1/Camk2d	24
BP	GO:0051647	nucleus localization	10/2387	35/21092	0.0043169	0.0410175	0.0324059	Ptk2/Cav3/Kif1a/Dock7/Tacc3/Cdc42bpa/Hook3/Sun2/4932438A13Rik/Syne2	10
BP	GO:0045621	positive regulation of lymphocyte differentiation	22/2387	108/21092	0.00436426	0.0414011	0.0327089	Lck/Gata3/Nfkbiz/Pnp/Prdm1/Sash3/Myb/Nckap1l/Cyld/Ptprc/Runx1/Zbtb16/Ccr2/Syk/Malt1/H2-Aa/Il12a/Cd74/Il2rg/Bcl6/Ap3b1/Rhoa	22
BP	GO:0032655	regulation of interleukin-12 production	13/2387	52/21092	0.00439583	0.041634	0.032893	Nfkb1/Jak3/Tlr3/Traf6/Flt3/Ager/Pibf1/Mapk14/Slamf1/Tlr8/Acp5/Tlr9/Plcb1	13
BP	GO:1903707	negative regulation of hemopoiesis	29/2387	155/21092	0.00442632	0.0418559	0.0330683	Pglyrp1/Cd44/Wdr61/Hist1h4f/Jak3/Rc3h2/Fbn1/Nme2/Cyld/Pilrb1/Flt3/Ncapg2/Meis2/Runx1/Cib1/Tmem131l/Dll1/Gpr171/Hist1h4b/Trib1/Zbtb16/Meis1/Prmt1/Tmem176a/Cd74/Bcl6/Fbxo7/Thoc5/Zfp36	29
BP	GO:0006403	RNA localization	32/2387	176/21092	0.00455921	0.0429755	0.0339528	Dhx9/Ranbp2/Nxt1/Nmd3/Sidt2/Terf1/Lrpprc/Pnpt1/Znhit6/Rpsa/Stau2/Poldip3/Nup85/Khsrp/Eif6/Nxt2/Ddx19a/Eif5a/Nup54/Hnrnpu/Hnrnpu/Cct2/Rae1/Nupl2/Atr/Xpo7/Tcp1/Cpsf6/Ranbp17/Sec13/Thoc5/Zfp36	32
BP	GO:0051170	import into nucleus	32/2387	176/21092	0.00455921	0.0429755	0.0339528	Ect2/Ranbp2/Nxt1/Txnip/Prkcd/Agt/Jup/Brca1/Ipo5/Flna/Ipo9/Ppp2ca/Ipo11/Cdkn1a/Hyal2/Nup85/Nxt2/Cep57/Akap5/Nup54/Arntl/Ddx5/Psen1/Ipo8/Mapk14/Pml/Gbp4/Syk/Cdk1/Kpna2/Cfl1/Bcl6	32
BP	GO:0009895	negative regulation of catabolic process	47/2387	283/21092	0.00456998	0.0430086	0.033979	Dhx9/Ptk2/Clec16a/Kdm4a/Eif4g2/Lrpprc/Ubqln4/Atraid/Qsox1/Hnrnpc/Flna/Chmp4b/Thrap3/Timp3/Usp14/Fam192a/Sf3b3/Dhx34/Usp30/Prkaa1/Rbm38/Psen2/Hnrnpu/Hnrnpu/Egfr/Psen1/Adra1b/Dab2ip/Dysf/Epha4/E2f1/Htra2/Pml/Senp1/Mtmr2/Etfbkmt/Scfd1/Ddit4/Pabpc1/Tlk2/Sirt6/Cbfa2t3/Map1a/Ehmt2/Zfp36/Atg7/Mdm4	47
BP	GO:0051261	protein depolymerization	23/2387	115/21092	0.00458612	0.0430921	0.0340449	Kif2c/Sh3bp1/Kif18a/Hdgfl3/Kif24/Map2/Tmod2/Nckap5/Cib1/Ckap2/Twf2/Hdac6/Dysf/Tpm1/Kif18b/Capg/Sh3gl2/Add1/Carmil1/Cfl1/Mid1/Map1a/Camsap3	23
BP	GO:0017015	regulation of transforming growth factor beta receptor signaling pathway	21/2387	102/21092	0.004636	0.043247	0.0341673	Dab2/Smurf1/Peg10/Got1/Cav2/Itga3/Fbn1/Flcn/Cav3/Ltbp1/Strap/Zfp451/Chst11/Htra1/Pmepa1/Snw1/Nrros/Htra3/Zeb1/Men1/Men1	21
BP	GO:0042035	regulation of cytokine biosynthetic process	21/2387	102/21092	0.004636	0.043247	0.0341673	Zfp287/Cybb/Nfkb1/Gata3/Prg4/Tnfrsf13c/Tlr3/Traf6/Ticam1/Ptprc/Nmi/Ccr2/Errfi1/Tlr8/Tlr7/Syk/Irf4/Tlr9/Glmn/Fcgr3/Zfp36	21
BP	GO:0000375	RNA splicing, via transesterification reactions	42/2387	247/21092	0.00463908	0.043247	0.0341673	Dhx9/Dhx8/Mbnl1/Rbm5/Hnrnpc/Srpk3/Luc7l/Syf2/Thrap3/Rnpc3/Rbm41/Snrpe/Gemin8/Rbm17/Srsf2/Sf3b3/Strap/Srpk2/U2af1l4/Hnrnpu/Hnrnpu/Ddx5/Hnrnpl/Fam172a/BC005624/Snw1/Luc7l3/Lsm8/Pqbp1/Sf3b1/Mettl3/Srrm1/Sfswap/Gemin6/Snrpb2/Rbm7/Srsf5/Snrnp70/Gcfc2/Snrpb/Psip1/Rbm25	42
BP	GO:0000377	RNA splicing, via transesterification reactions with bulged adenosine as nucleophile	42/2387	247/21092	0.00463908	0.043247	0.0341673	Dhx9/Dhx8/Mbnl1/Rbm5/Hnrnpc/Srpk3/Luc7l/Syf2/Thrap3/Rnpc3/Rbm41/Snrpe/Gemin8/Rbm17/Srsf2/Sf3b3/Strap/Srpk2/U2af1l4/Hnrnpu/Hnrnpu/Ddx5/Hnrnpl/Fam172a/BC005624/Snw1/Luc7l3/Lsm8/Pqbp1/Sf3b1/Mettl3/Srrm1/Sfswap/Gemin6/Snrpb2/Rbm7/Srsf5/Snrnp70/Gcfc2/Snrpb/Psip1/Rbm25	42
BP	GO:0000398	mRNA splicing, via spliceosome	42/2387	247/21092	0.00463908	0.043247	0.0341673	Dhx9/Dhx8/Mbnl1/Rbm5/Hnrnpc/Srpk3/Luc7l/Syf2/Thrap3/Rnpc3/Rbm41/Snrpe/Gemin8/Rbm17/Srsf2/Sf3b3/Strap/Srpk2/U2af1l4/Hnrnpu/Hnrnpu/Ddx5/Hnrnpl/Fam172a/BC005624/Snw1/Luc7l3/Lsm8/Pqbp1/Sf3b1/Mettl3/Srrm1/Sfswap/Gemin6/Snrpb2/Rbm7/Srsf5/Snrnp70/Gcfc2/Snrpb/Psip1/Rbm25	42
BP	GO:0090022	regulation of neutrophil chemotaxis	9/2387	30/21092	0.00467478	0.0435114	0.0343762	Nckap1l/Ednra/Mospd2/Jam3/Rac1/Dysf/Cd74/Slit2/C5ar1	9
BP	GO:0002921	negative regulation of humoral immune response	5/2387	11/21092	0.00474375	0.0438778	0.0346657	Ptpn6/Spink5/A2m/Fcgr2b/Serping1	5
BP	GO:0006266	DNA ligation	5/2387	11/21092	0.00474375	0.0438778	0.0346657	Lig3/Rad51/Top2a/Parp3/Paxx	5
BP	GO:0033539	fatty acid beta-oxidation using acyl-CoA dehydrogenase	5/2387	11/21092	0.00474375	0.0438778	0.0346657	Etfdh/Acad11/Etfbkmt/Acads/Etfa	5
BP	GO:0061577	calcium ion transmembrane transport via high voltage-gated calcium channel	5/2387	11/21092	0.00474375	0.0438778	0.0346657	Cacnb1/Nppa/Cacnb3/Cacna1c/Camk2d	5
BP	GO:0031062	positive regulation of histone methylation	11/2387	41/21092	0.0047902	0.0442385	0.0349507	Wdr61/Brca1/Myb/Dnmt1/Phf19/Paxbp1/Rnf20/Snw1/Hist1h1b/Men1/Men1	11
BP	GO:2001224	positive regulation of neuron migration	7/2387	20/21092	0.00480627	0.0443178	0.0350133	Sema3a/Flna/Dab2ip/Fbxo31/Kif20b/Plaa/Sema6a	7
BP	GO:0051236	establishment of RNA localization	29/2387	156/21092	0.00486319	0.0447731	0.035373	Dhx9/Ranbp2/Nxt1/Nmd3/Sidt2/Terf1/Lrpprc/Pnpt1/Rpsa/Stau2/Poldip3/Nup85/Khsrp/Eif6/Nxt2/Ddx19a/Eif5a/Nup54/Hnrnpu/Hnrnpu/Rae1/Nupl2/Atr/Xpo7/Cpsf6/Ranbp17/Sec13/Thoc5/Zfp36	29
BP	GO:0007020	microtubule nucleation	8/2387	25/21092	0.00488484	0.0448331	0.0354204	Dctn1/Cetn3/Cep192/Efcab11/Pde4dip/Nde1/Cenpj/Nin	8
BP	GO:0071402	cellular response to lipoprotein particle stimulus	8/2387	25/21092	0.00488484	0.0448331	0.0354204	Lpl/Pparg/Ticam1/Cd81/Cd9/Ldlr/Itgb2/Syk	8
BP	GO:0045637	regulation of myeloid cell differentiation	37/2387	212/21092	0.0049073	0.04492	0.0354891	Wdr61/Gnas/Stat1/Notch2/Csf1/Hist1h4f/Mef2c/Nckap1l/Ets1/Fbn1/Nme2/Rassf2/Pilrb1/Traf6/Ncapg2/Fgfr3/Klf10/Eif6/Meis2/Runx1/Cib1/Fas/Dll1/Gpr171/Hist1h4b/Trib1/Tfe3/Zbtb16/Mapk14/Meis1/Senp1/Prmt1/Il34/Cd74/Esrra/Thoc5/Zfp36	37
BP	GO:0019395	fatty acid oxidation	20/2387	96/21092	0.00490946	0.04492	0.0354891	Echdc2/Etfdh/Acoxl/Pdk4/Fabp1/Acaa1a/Pparg/Dgat1/Acad11/Por/Prkaa1/Acox1/Pex2/Mapk14/Etfbkmt/Hadha/Hadhb/Acads/Acox2/Etfa	20
BP	GO:0071383	cellular response to steroid hormone stimulus	31/2387	170/21092	0.00495404	0.0452035	0.035713	Dab2/Ufm1/Eif4ebp1/Pak1/Ncoa2/Brca1/Kdm5d/Zfp366/Skp2/Skp2/Akap13/Fam107a/Thrap3/Arid1a/Med12/Ncor1/Arntl/Nr3c2/Hnrnpu/Hnrnpu/Ddx5/Calcoco1/Ddit4/Bdnf/Trip4/Rhoa/Prmt2/Safb/Atp1a1/Zfp36/Klf9	31
BP	GO:0072332	intrinsic apoptotic signaling pathway by p53 class mediator	17/2387	77/21092	0.00495569	0.0452035	0.035713	Cd44/Zfp385b/Bdkrb2/Cdkn1a/Eda2r/Tmem109/Usp28/Chek2/Brca2/Ddx5/Snw1/E2f1/Pml/Pdk2/Ddit4/Cd74/Shisa5	17
BP	GO:0031349	positive regulation of defense response	54/2387	336/21092	0.00504427	0.0459409	0.0362956	Stap1/Dhx9/Nfkbiz/Mef2c/Cd300lf/Klrk1/Polr3f/Klrb1c/Ets1/Hyal2/Nppa/Tlr11/Lrsam1/Ankrd17/Il33/Tnfrsf11a/Tlr3/Ednra/Peli3/Polr3c/Ticam1/H60c/Ticam2/Egfr/Ffar2/Irgm1/Irgm1/Irgm1/Ager/Dab2ip/Pvr/Pum1/Pum1/Ccr2/Pde5a/Pqbp1/Gbp5/Tlr8/Ldlr/Tlr7/Sin3a/Traf3/Ccr5/Il12a/Cd74/Irf4/Tlr9/Rps6ka3/H2-T23/Zc3hav1/Ulbp1/Ulbp1/Fcgr3/Aim2	54
BP	GO:0090342	regulation of cell aging	12/2387	47/21092	0.00508379	0.0462297	0.0365238	Nuak1/Arg2/Rbl1/Pnpt1/Kras/Foxm1/Rsl1d1/Arntl/Abl1/Bcl6/Ypel3/Fbxo5	12
BP	GO:0010611	regulation of cardiac muscle hypertrophy	16/2387	71/21092	0.00511185	0.0464137	0.0366692	Ptk2/Pak1/Mef2a/Agt/Col14a1/Mef2c/Fdps/Gsk3a/Trip10/Cav3/Cdk9/Pde5a/Errfi1/Rgs2/Wisp1/Camk2d	16
BP	GO:0061013	regulation of mRNA catabolic process	23/2387	116/21092	0.00512199	0.0464347	0.0366858	Dhx9/Cnot7/Cnot8/Zc3h12d/Hnrnpc/Pnpt1/Hnrnpr/Thrap3/Nanos1/Khsrp/Dhx34/Rbm38/Hnrnpu/Hnrnpu/E2f1/Pum1/Pum1/Zc3h14/Tnrc6c/Mettl3/Pabpc1/Zc3hav1/Zfp36	23
BP	GO:0010506	regulation of autophagy	40/2387	234/21092	0.00513294	0.0464629	0.036708	Ptk2/Clec16a/Smurf1/Kdm4a/Eif4g2/Ulk2/Ubqln4/Mid2/Qsox1/Chmp4b/Trim21/Gsk3a/Nprl3/Lrsam1/Flcn/Srebf1/Usp30/Prkaa1/Ticam1/Dram2/Gpsm1/Ulk1/Irgm1/Irgm1/Irgm1/Ager/Hdac6/Htra2/Rnf152/Usp13/Scfd1/Rab3gap1/Atpif1/Tlr9/Kdr/Fbxo7/Gba/Ehmt2/Atg7/Tmem150b	40
BP	GO:0002700	regulation of production of molecular mediator of immune response	27/2387	143/21092	0.00518339	0.0467767	0.036956	Spink5/Gata3/Nsd2/Sash3/Jak3/Clcf1/Clcf1/Il33/Tlr3/Traf6/Siglecg/Ticam1/Ptprc/Fcgr2b/Spon2/Trp53bp1/Tnfrsf4/Ffar2/Mapk14/Il18r1/Slamf1/Malt1/Cd37/Cd74/Tlr9/Bcl6/H2-T23	27
BP	GO:0050680	negative regulation of epithelial cell proliferation	27/2387	143/21092	0.00518339	0.0467767	0.036956	Dab2/Stat1/Gata3/Mef2c/Cav2/Cxcr3/Pparg/Slurp1/Nfib/Strap/Fgfr3/Wnt10b/Brca2/Ager/Dab2ip/Pex2/Ctsl/Lims2/Tinf2/Sulf1/Atpif1/Atp5a1/Atp5a1/Wdr13/Men1/Men1/Klf9	27
BP	GO:0060997	dendritic spine morphogenesis	15/2387	65/21092	0.00522258	0.0470588	0.0371788	Dlg4/Baiap2/Ppp1r9a/Ephb3/Dtnbp1/Stau2/Eef2k/Dock10/Shank1/Hdac6/Epha4/Sipa1l1/Tiam1/Dnm3/Cfl1	15
BP	GO:0032663	regulation of interleukin-2 production	14/2387	59/21092	0.00527034	0.0473583	0.0374155	Gata3/Sash3/Prnp/Homer3/Il20rb/Traf6/Ptprc/Runx1/Ccr2/Malt1/Abl1/Irf4/Glmn/Zfp36	14
BP	GO:0009199	ribonucleoside triphosphate metabolic process	43/2387	256/21092	0.0052718	0.0473583	0.0374155	Ndufa7/Pkm/Nme6/Guk1/Atp5k/Zbtb20/Pfkp/Pnp/Ccnb1/Pfkfb2/Atp5g3/Surf1/Coq7/Insr/Flcn/Nme2/Ndufs1/Prkaa1/Atp1b1/Eif6/Khk/Mocs1/Gck/Ncor1/Cox5a/Rhoq/Uqcrh/Atp5j2/Atp5b/Nme7/Ddit4/Atpif1/Atp5a1/Atp5a1/Bdnf/Ppif/Eno4/Cdk1/Impdh1/Sirt6/Rhoa/Tefm/Cbfa2t3	43
BP	GO:0031623	receptor internalization	24/2387	123/21092	0.00531337	0.0476596	0.0376535	Dab2/Pard3/Nsf/Dlg4/Atxn2/Adm/Dtnbp1/Lrpap1/Arrb1/Cav3/Nedd4/Cd81/Akap5/Ulk1/Pip5k1c/Cd9/Sh3gl2/Grb2/Mtmr2/Itgb2/Syk/Ap2b1/Dnm3/Ap2m1	24
BP	GO:0045807	positive regulation of endocytosis	29/2387	157/21092	0.00533565	0.0477701	0.0377408	Dab2/Stap1/Pard3/Ptk2/Cd151/Kif3a/Cd300lf/Pparg/Dtnbp1/Nckap1l/Lman2/Hist1h1a/Ptx3/Itsn1/Arrb1/Cav3/Eef2k/Ptprc/Fcgr2b/Hip1/Dll1/Mbl1/Ager/Ldlr/Syk/Add1/Fcgr3/Rab27a/Ap2m1	29
BP	GO:0008361	regulation of cell size	36/2387	206/21092	0.00535109	0.0477701	0.0377408	Pak1/Sema3a/Eif4g2/Ulk2/Iqgap3/Fn1/Slc12a6/Slc12a6/Slc12a2/Bcl11a/Map2/Cav3/Lamtor5/Spg20/Ulk1/Twf2/Rac1/Rgma/Cdk4/Rufy3/Ifrd1/Add1/Ccr5/Bdnf/Lrrc8d/Lrrc8b/Anxa7/Slit2/Wdr36/Abl1/Cfl1/Rapgef3/Rhoa/Sema4d/Sema3f/Sema6a	36
BP	GO:0045732	positive regulation of protein catabolic process	36/2387	206/21092	0.00535109	0.0477701	0.0377408	Dab2/Ptk2/Nsf/Smurf1/Chfr/Rchy1/Arih1/Plk1/Stx5a/Gsk3a/Csnk1e/Snf8/Il33/Dtl/Aurka/Csnk1a1/Dnajb2/Sh3d19/Nedd4/Cd81/Psen2/Psen1/Dab2ip/Trib3/Trib1/Sumo3/Rgma/Ldlr/Usp13/Tmem67/Atpif1/Rnf144b/Trim67/Gba/Cbfa2t3/Atg7	36
BP	GO:1903532	positive regulation of secretion by cell	71/2387	465/21092	0.00536508	0.0477701	0.0377408	Dab2/Lpl/Dhx9/Golph3/Chuk/Glul/Nr1h2/Agt/Gata3/Ncl/Pfkfb2/Nlrp1a/Nlrp1a/Nlrp1a/Nlrp1a/Clec9a/Dtnbp1/Exoc1/Ang/Clcf1/Clcf1/Snf8/Itsn1/Arrb1/Ncs1/Hyal2/Nppa/Zfp384/Il33/Cacna1d/Sox11/Flt3/Cadps2/Htr2c/Doc2b/Runx1/Gck/Tnfsf15/Oxct1/Myrip/Usp50/Mmp13/Tnfrsf4/Ano1/Egfr/Ffar2/Mapk14/Postn/Slamf1/Sdc1/Sirt3/Tlr8/Itgb2/Syk/Rab3gap1/Ccr5/Baiap3/Abl1/Wls/H2-T23/Sec24a/Plcd1/Glmn/Kmo/Blk/Rab3a/Rab3a/Syt7/Ra…	71
BP	GO:0051567	histone H3-K9 methylation	10/2387	36/21092	0.0053817	0.0477701	0.0377408	Kdm4a/Prdm5/Brca1/Myb/Dnmt1/Pax5/Atrx/Kdm4b/Hist1h1b/Ehmt2	10
BP	GO:0071897	DNA biosynthetic process	30/2387	164/21092	0.00538209	0.0477701	0.0377408	Lig3/Rpa1/Terf1/Hnrnpc/Mcrs1/Pole/Pparg/Cdkn1a/Dtl/Blm/Lin9/Tk1/Rfc5/Pole2/Hnrnpu/Hnrnpu/Pclaf/Parp3/Sh2b1/Cct2/Pml/Polk/Tinf2/Atr/Aurkb/Tcp1/Men1/Men1/Cdkn2d/Pdgfrb	30
BP	GO:1902107	positive regulation of leukocyte differentiation	30/2387	164/21092	0.00538209	0.0477701	0.0377408	Gnas/Lck/Notch2/Csf1/Gata3/Nfkbiz/Pnp/Prdm1/Sash3/Myb/Nckap1l/Cyld/Traf6/Klf10/Ptprc/Runx1/Ager/Trib1/Zbtb16/Ccr2/Syk/Malt1/Il34/H2-Aa/Il12a/Cd74/Il2rg/Bcl6/Ap3b1/Rhoa	30
BP	GO:0044403	symbiont process	56/2387	352/21092	0.00540034	0.0478604	0.0378122	Pglyrp1/Apobec3/Tbc1d20/Dhx9/Cnot7/Stat1/Ulk2/Mid2/Fn1/Chmp4b/Cav2/Trim21/Scd1/Top2a/Eea1/Ptx3/Snf8/Hyal2/Insr/Lrsam1/Stom/Lamtor5/Trim59/Chd1/Vps16/Pcbp2/Hacd3/Srpk2/Ulk1/Sqstm1/Ppib/Mbl1/Ddx5/Irgm1/Irgm1/Irgm1/Snw1/Pml/Nectin4/Gbp3/Atg16l1/Ccl4/Eif3d/Ccr5/Pabpc1/Pfn1/Tcp1/Cd74/Cfl1/Zc3hav1/Oasl2/Smc3/Thoc5/Icam1/Zfp36/Atg7	56
BP	GO:0002262	myeloid cell homeostasis	31/2387	171/21092	0.00541116	0.0478848	0.0378314	Cd44/Stat1/Casp3/Mthfd1/Gata3/Jak3/Sfxn1/Nckap1l/Prdx1/Flvcr1/Ets1/Dnase2a/Klf2/Ncapg2/Hbb-b1/Fcgr2b/Ncor1/Epas1/Jam3/Mapk14/Ccr2/Senp1/Hba-a1/Prmt1/Add1/Atpif1/Bcl6/Heph/Plcb1/Zfp36/Rhag	31
BP	GO:0072594	establishment of protein localization to organelle	61/2387	390/21092	0.00557587	0.0492688	0.0389248	Ect2/Ranbp2/Smurf1/Nxt1/Terf1/Pmm1/Txnip/Prkcd/Agt/Jup/Brca1/Ipo5/Flna/Chmp4b/Ipo9/Gsk3a/Snf8/Ppp2ca/Ipo11/Cdkn1a/Hyal2/Lrsam1/Nup85/Gnptg/Srebf1/Nedd4/Prkaa1/Nxt2/Tomm40l/Cep57/Akap5/Nup54/Arntl/Brca2/Ddx5/Psen1/Ipo8/Scarb2/Cox18/Cct2/Pex2/Mapk14/Pml/Gbp4/Lamp2/Maip1/Folr2/Syk/Rab3gap1/Atpif1/Hist1h1b/Cdk1/Tcp1/Grpel2/Kpna2/Cfl1/Bcl6/Ap3b1/Mterf4/Fbxo7/Pik3r4	61
BP	GO:0034101	erythrocyte homeostasis	26/2387	137/21092	0.00560419	0.0494453	0.0390643	Stat1/Casp3/Gata3/Jak3/Sfxn1/Nckap1l/Prdx1/Flvcr1/Ets1/Dnase2a/Klf2/Ncapg2/Hbb-b1/Ncor1/Epas1/Mapk14/Senp1/Hba-a1/Prmt1/Add1/Atpif1/Bcl6/Heph/Plcb1/Zfp36/Rhag	26
CC	GO:0098687	chromosomal region	94/2426	302/21298	1.57186e-20	8.79521e-18	7.05139e-18	Zwilch/Cbx5/Bub1b/Cenpi/Spdl1/Cenpm/Nsl1/Rad51/Knl1/Kdm4a/Rpa1/Kif2c/Terf1/Hells/Mis18bp1/Cenpn/Dctn1/Anapc16/Plk1/Ncapd2/Cenpx/Fen1/Cenpk/Ccnb1/Smc5/Spag5/Mbd5/Kif18a/A730008H23Rik/Ska3/Ppp2ca/Dnmt1/Mtbp/Esco2/Dclre1a/Nup85/Mki67/Blm/Aurka/Rassf2/Cenpa/Csnk1a1/Ercc6l/Dna2/Bub1/Chek2/Terf2ip/Smc6/Zfp207/Orc1/Cenph/Cenpq/Trp53bp1/Psen2/Brca2/Hnrnpu/Hnrnpu/Cenpc1/Spc24/Ndc80/Psen1/Cenpf/Pml/Ncapg/C…	94
CC	GO:0000775	chromosome, centromeric region	71/2426	193/21298	2.40965e-20	8.79521e-18	7.05139e-18	Zwilch/Cbx5/Bub1b/Cenpi/Spdl1/Cenpm/Nsl1/Knl1/Kdm4a/Kif2c/Hells/Mis18bp1/Cenpn/Dctn1/Anapc16/Plk1/Ncapd2/Cenpx/Cenpk/Ccnb1/Spag5/Kif18a/A730008H23Rik/Ska3/Ppp2ca/Dnmt1/Mtbp/Esco2/Nup85/Mki67/Aurka/Rassf2/Cenpa/Csnk1a1/Ercc6l/Bub1/Zfp207/Cenph/Cenpq/Trp53bp1/Psen2/Hnrnpu/Hnrnpu/Cenpc1/Spc24/Ndc80/Psen1/Cenpf/Ncapg/Cenpu/Atrx/Ska2/Sin3a/Kdm4b/Spc25/Cenpw/Snai1/Cenpp/Birc5/Aurkb/Cdca8/Nde1/Ttk/Kntc1…	71
CC	GO:0000776	kinetochore	54/2426	135/21298	1.10571e-17	2.69057e-15	2.15711e-15	Zwilch/Cbx5/Bub1b/Cenpi/Spdl1/Cenpm/Nsl1/Knl1/Kif2c/Mis18bp1/Cenpn/Dctn1/Anapc16/Plk1/Cenpx/Cenpk/Ccnb1/Spag5/Kif18a/A730008H23Rik/Ska3/Mtbp/Nup85/Rassf2/Cenpa/Csnk1a1/Ercc6l/Bub1/Zfp207/Cenph/Trp53bp1/Psen2/Hnrnpu/Hnrnpu/Cenpc1/Spc24/Ndc80/Psen1/Cenpf/Cenpu/Ska2/Sin3a/Spc25/Cenpw/Birc5/Aurkb/Nde1/Ttk/Kntc1/Knstrn/Sec13/Sgo1/Cenpe/Cdt1	54
CC	GO:0005874	microtubule	101/2426	425/21298	3.19392e-13	5.82891e-11	4.67321e-11	Kif23/Dynlrb1/Prc1/Kif11/Kif11/Gas2l3/Dcdc2b/Nusap1/Kif2c/Tubd1/Dctn1/Plk1/Map4/Lrpprc/Mid2/Baiap2/Cep170b/Cep170b/Ncoa2/Kifc3/Kif3a/Tube1/Mdm1/Stard9/Spag5/Gabarap/Kif4/Rassf1/Kif18a/Gsk3a/Ska3/Lzts2/Hook1/Kif15/Spast/Stau2/Map1lc3b/Trip10/Kif24/Myo5a/Cyld/Map2/Aurka/Tubb4b/Kif1a/Cep57/Nckap5/Kif21b/Zfp207/Saxo2/Eml1/Mark4/Ino80/Hnrnpu/Hnrnpu/Ttll5/Ckap2/Clip1/Tpx2/Haus3/Hdac6/Dysf/Cct2/Kif18b/K…	101
CC	GO:0005819	spindle	69/2426	268/21298	4.24556e-11	6.19852e-09	4.96954e-09	Kif23/Pard3/Ect2/Bub1b/Prc1/Kif11/Kif11/Spdl1/Agbl5/Nusap1/Terf1/Aunip/Dctn1/Plk1/Racgap1/Map4/Wdr73/Kif3a/Ccnb1/Spag5/E4f1/Kif18a/Dlgap5/Ska3/Pkp4/Fam83d/Cyld/Aurka/Mms19/Tbck/Gpsm2/Ddx11/Ncor1/Tacc3/Eml1/Hnrnpu/Hnrnpu/Tpx2/Haspin/Haus3/Wdr62/Kif18b/Kifc1/Rae1/Mapk14/Cdc27/Cenpf/Aspm/Capg/Kif22/Slc25a5/Ska2/Birc5/Aurkb/Cdk1/Cdca8/Nde1/Kntc1/Knstrn/Fam161a/Sgo1/Myh9/Psrc1/Cdc6/Smc3/Kif20b/Cenpe/N…	69
CC	GO:0000779	condensed chromosome, centromeric region	24/2426	49/21298	7.43044e-11	9.04036e-09	7.24793e-09	Bub1b/Spdl1/Nsl1/Knl1/Mis18bp1/Plk1/Ncapd2/Ccnb1/A730008H23Rik/Ska3/Aurka/Cenpa/Bub1/Cenpc1/Ndc80/Cenpf/Ncapg/Atrx/Ska2/Spc25/Birc5/Aurkb/Sgo1/Cenpe	24
CC	GO:0072686	mitotic spindle	36/2426	103/21298	2.72467e-10	2.84144e-08	2.27807e-08	Kif23/Ect2/Kif11/Kif11/Agbl5/Nusap1/Racgap1/Map4/Spag5/Kif18a/Pkp4/Fam83d/Aurka/Tbck/Gpsm2/Ncor1/Tacc3/Eml1/Hnrnpu/Hnrnpu/Tpx2/Haus3/Kif18b/Kifc1/Rae1/Aspm/Capg/Kif22/Aurkb/Cdk1/Knstrn/Fam161a/Smc3/Kif20b/Cenpe/Nin	36
CC	GO:0000777	condensed chromosome kinetochore	18/2426	33/21298	1.87248e-09	1.70863e-07	1.36986e-07	Bub1b/Spdl1/Nsl1/Knl1/Mis18bp1/Plk1/Ccnb1/A730008H23Rik/Ska3/Cenpa/Bub1/Cenpc1/Ndc80/Cenpf/Ska2/Spc25/Birc5/Cenpe	18
CC	GO:0005876	spindle microtubule	22/2426	53/21298	2.17632e-08	1.76524e-06	1.41524e-06	Kif11/Kif11/Nusap1/Plk1/Kif3a/Spag5/Kif18a/Ska3/Aurka/Hnrnpu/Hnrnpu/Tpx2/Kif18b/Cdc27/Ska2/Birc5/Aurkb/Cdk1/Kntc1/Fam161a/Psrc1/Cenpe	22
CC	GO:0000940	condensed chromosome outer kinetochore	10/2426	14/21298	2.34378e-07	1.71096e-05	1.37173e-05	Bub1b/Spdl1/Plk1/Ccnb1/Ska3/Bub1/Ndc80/Cenpf/Ska2/Cenpe	10
CC	GO:0030496	midbody	38/2426	141/21298	2.70207e-07	1.79319e-05	1.43766e-05	Kif23/Ect2/Prc1/Agbl5/Plk1/Racgap1/Anln/Chmp4b/Wiz/Cit/Mbd5/Kif4/Dtnbp1/Pkp4/Lzts2/Spast/Flcn/Cyld/Tbck/Ctnnd1/Ctnnd1/Ddx11/Mark4/Usp50/Hnrnpu/Hnrnpu/Cenpc1/Cenpf/Aspm/Capg/Birc5/Aurkb/Cdk1/Cdca8/Psrc1/Kif20b/BC004004/Cenpe	38
CC	GO:0000307	cyclin-dependent protein kinase holoenzyme complex	18/2426	43/21298	3.56113e-07	2.16635e-05	1.73683e-05	Ccne2/Ccne1/Ccnh/Ccnb1/Ccnd1/Cdkn1a/Cks1b/Ccna2/Ccno/Ccnb2/Cdk9/Snw1/Ccnf/Cdk4/Ccnd3/Cdk1/Cks2/Cdkn2d	18
CC	GO:0005871	kinesin complex	21/2426	57/21298	5.07983e-07	2.73181e-05	2.19018e-05	Kif23/Kif11/Kif11/Kif2c/Kifc3/Kif3a/Stard9/Kif4/Kif18a/Kif15/Kif24/Kif1a/Kif21b/Kif18b/Kifc1/Kif1b/Kif22/Kif26b/Nde1/Kif20b/Cenpe	21
CC	GO:0031252	cell leading edge	76/2426	378/21298	5.23909e-07	2.73181e-05	2.19018e-05	Cd44/Ptk2/Frmd4b/Hcn1/Mcf2l/Pak1/Gnas/Bspry/Dctn1/Sgce/Unc5a/Ablim1/Sh3bp1/Plekha1/Ppp1r9a/Spata13/Cit/Antxr1/Kif18a/Stx3/Itsn1/Fam107a/Dlc1/Cyth2/Dgkz/Insr/Myo5a/Nme2/Map2/Cacna1d/Robo2/Pxn/Ctnnd1/Ctnnd1/Myo1g/Fat1/Pdlim7/Akap5/Cib1/Gdpd2/Ajuba/Kcna2/Cdc42bpa/Twf2/Fgd2/Hdac6/Sh2b1/Rac1/Dysf/Fgd1/Rufy3/Epb41l3/Palld/Scimp/Inpp5j/Phldb2/Syne2/S100a6/Tiam1/Atf4/Coro1a/Aak1/Atp2b1/Arhgef6/Sra1/Carmi…	76
CC	GO:0009898	cytoplasmic side of plasma membrane	41/2426	162/21298	5.83821e-07	2.84126e-05	2.27793e-05	Dlg4/Mcf2l/Nphs2/Chuk/Gnas/Lck/Srms/Racgap1/Jup/Chmp4b/Cav2/Kras/Exoc1/Pkp4/Epb41/Nptxr/Cyld/Cnr2/Traf6/Fgfr3/Ptprc/Gramd1a/Akap5/Ptpn4/Hip1/Gngt2/Atp2c2/Gng12/Prmt8/Htra2/Alox15/Ikbkb/Errfi1/Gng8/S100a6/Tiam1/Traf3/Atp2b1/Rgs2/Rhoa/Blk	41
CC	GO:0098562	cytoplasmic side of membrane	43/2426	177/21298	1.03758e-06	4.73397e-05	3.79537e-05	Dlg4/Mcf2l/Nphs2/Chuk/Gnas/Lck/Srms/Racgap1/Jup/Chmp4b/Cav2/Kras/Exoc1/Pkp4/Epb41/Nptxr/Ptpn1/Cyld/Cnr2/Traf6/Fgfr3/Ptprc/Gramd1a/Akap5/Ptpn4/Hip1/Gngt2/Atp2c2/Gng12/Prmt8/Htra2/Alox15/Ikbkb/Errfi1/Sppl3/Gng8/S100a6/Tiam1/Traf3/Atp2b1/Rgs2/Rhoa/Blk	43
CC	GO:0005875	microtubule associated complex	37/2426	147/21298	2.33901e-06	0.00010044	8.05257e-05	Kif23/Fnta/Dynlrb1/Kif11/Kif11/Kif2c/Dctn1/Kifc3/Kif3a/Stard9/Gabarap/Kif4/Kif18a/Nudcd3/Kif15/Dnah9/Map1lc3b/Kif24/Map2/Aurka/Kif1a/Kif21b/Haus3/Hdac6/Kif18b/Kifc1/Kif1b/Kif22/Kif26b/Dnah8/Birc5/Aurkb/Cdca8/Nde1/Kif20b/Map1a/Cenpe	37
CC	GO:0000922	spindle pole	33/2426	125/21298	2.64102e-06	0.000107108	8.58718e-05	Kif11/Kif11/Spdl1/Aunip/Dctn1/Plk1/Wdr73/Ccnb1/Spag5/Dlgap5/Pkp4/Fam83d/Aurka/Gpsm2/Ddx11/Eml1/Tpx2/Wdr62/Kifc1/Rae1/Mapk14/Cenpf/Aspm/Aurkb/Nde1/Kntc1/Fam161a/Sgo1/Psrc1/Cdc6/Smc3/Kif20b/Nin	33
CC	GO:0000790	nuclear chromatin	76/2426	397/21298	3.64356e-06	0.000137097	0.000109915	Cbx5/Smarcd2/Dhx9/Sap30/Rad51/Appl2/Igfbp3/Mef2a/Stat1/Ing3/Hist1h3a/Gata3/Hist1h4f/Mcrs1/Mef2c/Timeless/Asf1b/Rad51ap1/Etv3/Hist1h1a/Nfatc2/Prdx1/0610010K14Rik/Esco2/Smarca2/Satb1/Arid1a/Cenpa/Hist1h2af/Ddx11/Klf2/Cdk9/Cecr2/Hist2h3b/Ncor1/Sirt7/Gatad2a/Ino80/Brd8/Hist1h2ah/Cenpc1/Hist1h4b/Hist1h3h/E2f1/Hist2h3c2/Calcoco1/Nfatc1/Hist2h3c1/Chd3/Kdm2a/Hist1h3g/Rbbp7/Atrx/Sin3a/Kdm4b/Dffb/Hist1h1b/…	76
CC	GO:0000780	condensed nuclear chromosome, centromeric region	13/2426	28/21298	3.75608e-06	0.000137097	0.000109915	Bub1b/Mis18bp1/Plk1/Ccnb1/Aurka/Cenpa/Bub1/Cenpc1/Ndc80/Atrx/Aurkb/Sgo1/Cenpe	13
CC	GO:0000778	condensed nuclear chromosome kinetochore	9/2426	15/21298	8.36818e-06	0.000282777	0.000226711	Bub1b/Mis18bp1/Plk1/Ccnb1/Cenpa/Bub1/Cenpc1/Ndc80/Cenpe	9
CC	GO:0000793	condensed chromosome	43/2426	191/21298	8.52203e-06	0.000282777	0.000226711	Lig3/Bub1b/Spdl1/Nsl1/Rad51/Knl1/Rpa1/Mis18bp1/Plk1/Ncapd2/Lrpprc/Brca1/Ccnb1/Top2a/Smc5/A730008H23Rik/Ska3/Mki67/Blm/Aurka/Smc2/Cenpa/Ncapg2/Bub1/Smc6/Brca2/Cenpc1/Ndc80/Cenpf/Fancd2/Ncapg/Atrx/Ska2/Sun2/Spc25/Ncaph2/Birc5/Aurkb/Sgo1/Cdca5/Smc3/Cenpe/Rcc1	43
CC	GO:0005635	nuclear envelope	76/2426	409/21298	1.10941e-05	0.000352116	0.000282302	Tbc1d20/Unc50/Kcnh2/Ranbp2/Cybb/Pak1/Nxt1/Dctn1/Atraid/Ipo5/Chmp4b/Cav2/Ipo9/Ifi27/Prnp/Rrm2/Nat8f7/Rrm1/Tfdp2/Apeh/Ipo11/Tmem109/Spast/Nrxn1/Stau2/Insr/Ankrd17/Nup85/Ednra/Dnajb2/Ndufb4/Hsd11b1/Nxt2/Ddx19a/Nrm/Lmnb1/Eif5a/Nup54/Terf2ip/Hacd3/Ptgs1/Pcyt1a/Psen2/Psen1/Ipo8/Clip1/Adra1b/Trib3/Rae1/Cenpf/Cdk4/Ern1/Pml/Senp1/Nupl2/Sun2/Syne2/S100a6/Brip1/Epc1/Smox/Gmcl1/Xpo7/Anxa7/Abcf1/Ranbp17/Dpy19…	76
CC	GO:0051233	spindle midzone	14/2426	35/21298	1.34559e-05	0.000409283	0.000328134	Plk1/Racgap1/Kif18a/Pkp4/Aurka/Eml1/Hnrnpu/Hnrnpu/Kif18b/Aurkb/Cdca8/Cdc6/Kif20b/Cenpe	14
CC	GO:0016607	nuclear speck	61/2426	311/21298	1.49208e-05	0.000435687	0.000349303	Cnot7/Zc3h13/Nsl1/Bard1/Nr4a2/Tmem179b/Nostrin/Fbxl4/Nfkbiz/Mef2c/Smc5/Osgep/Syf2/Tatdn2/Fam107a/Dgkz/Thrap3/Poldip3/Dusp11/Cops4/Ppp4r3b/Rp9/Csnk1a1/Srsf2/Brd2/Tap2/Ncapg2/Prkaa1/Sdcbp2/Fnbp4/Rbm39/Hnrnpu/Hnrnpu/Epas1/Afdn/Snw1/Zbtb16/Mapk14/Pum1/Pum1/Zc3h14/Luc7l3/Grcc10/Pqbp1/Sf3b1/Kif22/Mettl3/Prpf4b/Rmi2/Pnn/Bdnf/E2f7/Phf7/Cpsf6/Snrpb2/Carmil1/Cdc25c/Srsf5/Plcb1/Oip5/Ehmt2	61
CC	GO:0035770	ribonucleoprotein granule	45/2426	210/21298	2.02749e-05	0.000569256	0.00045639	Dhx30/Dhx9/Atxn2/Cnot7/Cnot8/Mbnl1/Bard1/Nsun2/Zc3h12d/Tstd1/Nfkbiz/Ctsh/Ncl/Wtip/Blnk/Larp4/Pitpnm1/Pitpnm1/Stau2/Poldip3/Pan3/Khsrp/Psmc2/Cdk9/Eif4enif1/Ajuba/Arntl/Sqstm1/Hnrnpu/Hnrnpu/Ddx5/Hnrnpl/Tdrd5/Rac1/Ogfod1/Pum1/Pum1/Tnrc6c/Pqbp1/Ago1/Actb/Edc4/Pabpc1/Kpna2/Zfp36	45
CC	GO:1902554	serine/threonine protein kinase complex	23/2426	83/21298	3.61701e-05	0.000977932	0.000784038	Ccne2/Ccne1/Chuk/Phkb/Ccnh/Ccnb1/Ccnd1/Cdkn1a/Cks1b/Ccna2/Ccno/Ccnb2/Cdk9/Ulk1/Phka1/Snw1/Ccnf/Cdk4/Ikbkb/Ccnd3/Cdk1/Cks2/Cdkn2d	23
CC	GO:0036464	cytoplasmic ribonucleoprotein granule	42/2426	197/21298	4.26593e-05	0.00110265	0.000884028	Dhx9/Atxn2/Cnot7/Cnot8/Mbnl1/Bard1/Nsun2/Zc3h12d/Tstd1/Nfkbiz/Ctsh/Ncl/Wtip/Blnk/Larp4/Pitpnm1/Pitpnm1/Stau2/Poldip3/Pan3/Khsrp/Psmc2/Cdk9/Eif4enif1/Ajuba/Arntl/Sqstm1/Hnrnpu/Hnrnpu/Tdrd5/Rac1/Ogfod1/Pum1/Pum1/Tnrc6c/Pqbp1/Ago1/Actb/Edc4/Pabpc1/Kpna2/Zfp36	42
CC	GO:0044815	DNA packaging complex	25/2426	95/21298	4.38039e-05	0.00110265	0.000884028	Ncapd2/Hist1h3a/Hist1h4f/Shprh/Hist1h1a/Hist1h2bb/Smc2/Cenpa/Hist1h2af/Ncapg2/Hist1h3c/Hist2h3b/Hist1h2bk/Hist1h2ah/Hist1h4b/Hist1h3h/Hist2h3c2/Hist2h3c1/Ncapg/Hist1h3g/Hist1h2bm/Ncaph2/Hist1h1b/Irf4/Hist1h3i	25
CC	GO:0097431	mitotic spindle pole	12/2426	30/21298	5.57446e-05	0.00128058	0.00102668	Spag5/Fam83d/Aurka/Gpsm2/Eml1/Rae1/Aspm/Aurkb/Fam161a/Smc3/Kif20b/Nin	12
CC	GO:1990752	microtubule end	12/2426	30/21298	5.57446e-05	0.00128058	0.00102668	Kif2c/Dctn1/Spag5/Myo5a/Nckap5/Clip1/Kif18b/Aspm/Pde4dip/Knstrn/Nin/Camsap3	12
CC	GO:1902911	protein kinase complex	26/2426	102/21298	5.6135e-05	0.00128058	0.00102668	Ccne2/Ccne1/Chuk/Phkb/Ccnh/Ccnb1/Map3k5/Ccnd1/Cdkn1a/Cks1b/Insr/Ccna2/Prkaa1/Ccno/Ccnb2/Cdk9/Ulk1/Phka1/Snw1/Ccnf/Cdk4/Ikbkb/Ccnd3/Cdk1/Cks2/Cdkn2d	26
CC	GO:0005721	pericentric heterochromatin	10/2426	22/21298	6.3787e-05	0.00141105	0.00113128	Cbx5/Kdm4a/Hells/Dnmt1/Esco2/Cenpa/Cenpc1/Atrx/Kdm4b/Snai1	10
CC	GO:1990023	mitotic spindle midzone	8/2426	15/21298	8.59855e-05	0.00180295	0.00144548	Kif18a/Eml1/Hnrnpu/Hnrnpu/Kif18b/Aurkb/Kif20b/Cenpe	8
CC	GO:0030027	lamellipodium	36/2426	165/21298	8.86141e-05	0.00180295	0.00144548	Cd44/Ptk2/Mcf2l/Pak1/Ablim1/Sh3bp1/Ppp1r9a/Spata13/Antxr1/Stx3/Itsn1/Dgkz/Nme2/Pxn/Ctnnd1/Ctnnd1/Myo1g/Fat1/Cib1/Gdpd2/Ajuba/Kcna2/Cdc42bpa/Twf2/Rac1/Dysf/Fgd1/Rufy3/Syne2/Coro1a/Arhgef6/Carmil1/Cfl1/Rapgef3/Rhoa/Nf2	36
CC	GO:0016529	sarcoplasmic reticulum	20/2426	71/21298	8.89127e-05	0.00180295	0.00144548	Manf/Cacnb1/Atp2a3/Pomt1/Rtn2/Tmem109/Trdn/Sgcd/Calu/Rasd1/Camk2g/Sar1a/Cherp/Syne2/Hrc/Pygm/Pygm/Mrvi1/Nos1ap/Camk2d	20
CC	GO:0016605	PML body	20/2426	72/21298	0.000110067	0.0021716	0.00174104	Cbx5/Chfr/Rad51/Rpa1/Sp100/Morc3/Smc5/Satb1/Blm/Casp8ap2/Ciita/Cdk9/Chek2/Smc6/Sqstm1/Ikbke/Zbtb16/Pml/Atrx/Atr	20
CC	GO:0030139	endocytic vesicle	36/2426	169/21298	0.000147745	0.00283826	0.00227552	Cybb/Actg1/Lck/Rab14/Itsn1/Nrxn1/Hyal2/A830010M20Rik/Pld4/Pld4/Heatr5a/Hip1/Egfr/Irgm1/Irgm1/Irgm1/Dab2ip/Dysf/Kifc1/Slamf1/Capg/Inpp5f/Tlr7/Lamp2/Stxbp4/Syk/Coro1a/Stx8/Tlr9/Ehd1/Ehd1/Cdc42ep4/Zyx/Syt7/Rapgef6/Ap2m1	36
CC	GO:0044450	microtubule organizing center part	34/2426	157/21298	0.0001596	0.00298739	0.00239508	Lck/Dctn1/Plk1/Kif3a/Cetn3/Hyls1/Mdm1/Stard9/Top2a/Spag5/C2cd3/Stil/Alms1/Kif24/Cep192/Wdr90/Saxo2/Mphosph9/Mark4/Cntln/Rac1/Odf2l/Pibf1/Hook3/Ccnf/Capg/Efcab11/Deup1/Cep170/Birc5/Tcp1/Fam161a/Cenpj/Nin	34
CC	GO:0016528	sarcoplasm	21/2426	80/21298	0.000180574	0.00329548	0.00264209	Manf/Cacnb1/Atp2a3/Pomt1/Dtnbp1/Rtn2/Tmem109/Trdn/Sgcd/Calu/Rasd1/Camk2g/Sar1a/Cherp/Syne2/Hrc/Pygm/Pygm/Mrvi1/Nos1ap/Camk2d	21
CC	GO:0098827	endoplasmic reticulum subcompartment	82/2426	495/21298	0.000312929	0.00538858	0.00432018	Tbc1d20/Pgap2/Moxd1/Sgms1/Atp2a3/Gpaa1/Fkbp8/Rft1/Eda/Spink5/Ubqln4/Pnpt1/Sel1l/Scd1/Pomt1/Rhbdf1/Syvn1/Gm12185/Gm12185/Gm12185/Srebf2/Dtnbp1/Lman2/Dnajc25/Map3k5/Tmtc2/Rtn2/Sdf2/Spast/Rpn2/Slc35b3/Dgat1/Ptpn1/Rp9/Trdn/Dnajb2/Tap2/Slc16a11/Atl2/March1/Dpm1/Gramd1a/Pcyt1a/Gpsm1/Lrmp/Cept1/Lpin2/Gpat4/Slc35g1/Magt1/Yif1b/Irgm1/Irgm1/Irgm1/Pigb/Ern1/Pml/Emc8/Slc37a1/Insig1/Emc1/Cherp/Tmem67/Soat1/Cl…	82
CC	GO:0005911	cell-cell junction	78/2426	466/21298	0.000313476	0.00538858	0.00432018	Pard3/Ect2/Ptk2/F11r/Ptpn6/Frmd4b/Nphs2/Pak1/Tgm1/Lck/Patj/Gjb6/Iqgap3/Prkcd/Jup/Kifc3/Flna/Sh3bp1/Nphp1/Lsr/Ybx3/Wtip/Traf4/Cgn/Stx3/Ccnd1/Pkp4/Nck1/Tacstd2/Fxyd1/Cyth2/Nrxn1/Amtn/Flcn/Cav3/Vangl2/Scn5a/Ctnnd1/Ctnnd1/Atp1b1/Cldn4/Snap23/Fat1/Pdlim7/Lama3/Ajuba/Mmp13/Prkch/Cldn23/Cdc42bpa/Jam3/Adra1b/Amotl2/Afdn/Pvr/Cdk4/Frmd4a/Epb41l3/Nectin4/Slc4a1/Usp53/Grb2/Tiam1/Add1/Pnn/Synpo/Coro1a/Arhgef6…	78
CC	GO:0001650	fibrillar center	29/2426	131/21298	0.000317409	0.00538858	0.00432018	Dab2/Fblim1/Nuak1/Imp4/Kdm4a/Terf1/Ube2n/Zfp385b/Ncl/Kdm5d/Hoxb5/Nfic/Pak6/Ip6k1/Ipo11/Dusp11/Nfib/Dclre1a/Selenbp1/Ddx11/Chd1/Orc6/Pax5/Ager/Mri1/Rae1/Malt1/Snrpb2/Map3k14	29
CC	GO:0000784	nuclear chromosome, telomeric region	20/2426	78/21298	0.000357133	0.00592516	0.00475038	Cbx5/Rad51/Rpa1/Terf1/Fen1/Dclre1a/Dna2/Terf2ip/Orc1/Trp53bp1/Brca2/Pml/Atrx/Sun2/Tinf2/Men1/Men1/Sirt6/Thoc5/Nabp1	20
CC	GO:0005814	centriole	25/2426	109/21298	0.000455745	0.0073932	0.00592735	Dctn1/Plk1/Kif3a/Cetn3/Hyls1/Mdm1/Stard9/Top2a/C2cd3/Stil/Alms1/Kif24/Cep192/Wdr90/Saxo2/Mphosph9/Cntln/Ccnf/Capg/Deup1/Cep170/Birc5/Fam161a/Cenpj/Nin	25
CC	GO:0000151	ubiquitin ligase complex	50/2426	275/21298	0.000554873	0.0088056	0.00705971	Fbxl21/Ube2c/Kctd17/Bard1/Rchy1/Arih1/Anapc16/Ube2n/Fbxl4/Armc8/Med21/Brca1/Sel1l/Eloc/Trim21/Syvn1/Usp47/Klhl12/Babam2/Trpc4ap/Skp2/Skp2/Crbn/Cks1b/Klhl25/Dtl/Gid8/Med12/Rnf20/Cdk8/Rbck1/Nedd4/Anapc5/Cdc27/Amn1/Ccnf/Lrrc29/Cdc20/Fbxl3/Rnf144b/Fbxo31/Dcaf11/Commd1/Med31/Cul2/Cks2/Fbxo7/Glmn/Fbxo17/Med6	50
CC	GO:0035371	microtubule plus-end	9/2426	23/21298	0.000582869	0.00905307	0.00725812	Kif2c/Dctn1/Spag5/Myo5a/Nckap5/Clip1/Kif18b/Pde4dip/Knstrn	9
CC	GO:0001527	microfibril	6/2426	11/21298	0.000602635	0.00905525	0.00725987	Mfap5/Fbn1/Thsd4/Mfap4/Ltbp1/Mfap1b	6
CC	GO:0000781	chromosome, telomeric region	25/2426	111/21298	0.000607818	0.00905525	0.00725987	Cbx5/Rad51/Rpa1/Terf1/Fen1/Smc5/Dclre1a/Blm/Dna2/Chek2/Terf2ip/Smc6/Orc1/Trp53bp1/Brca2/Pml/Atrx/Sun2/Tinf2/Men1/Men1/Sirt6/Thoc5/Rad17/Nabp1	25
CC	GO:0098857	membrane microdomain	62/2426	361/21298	0.000630965	0.0092121	0.00738562	Nphs2/Gnas/Lck/Casp3/Serpinh1/Cav2/Kcna3/Kras/Prnp/Kif18a/Fxyd1/Dlc1/Hyal2/Insr/Stom/Ednra/Cav3/Lamtor5/Scn5a/Adcy3/Nedd4/Atp1b1/Ptprc/Fcgr2b/Vdac2/Itga1/Fas/Dll1/Egfr/Rhoq/Psen1/Kcne3/Hdac6/Dysf/Atp5b/Ldlr/Slc25a5/Lamp2/Ldhb/Cln3/Efnb1/Itgb2/Actb/Sulf1/Add1/Cacna1c/Lamtor3/Atp5a1/Atp5a1/Atp2b1/Usp48/Slc27a1/Kdr/Plcd1/Nf2/Lamtor1/Eef2/Atp1a1/Cd79a/Nos1ap/Icam1/Pecam1	62
CC	GO:0061695	transferase complex, transferring phosphorus-containing groups	46/2426	251/21298	0.000757985	0.0108496	0.00869845	Wdr61/Ccne2/Pkm/Ccne1/Chuk/Phkb/Rprd2/Pfkp/Ccnh/Ccnb1/Pole/Polr3f/Polr1c/Papss1/Map3k5/Taf2/Ccnd1/Cdkn1a/Cks1b/Insr/Ccna2/Dna2/Polr3c/Prkaa1/Ccno/Pole2/Ccnb2/Cdk9/Gtf2h5/Ulk1/Phka1/Snw1/Pex2/Ccnf/Cdk4/Ikbkb/Ccnd3/Polr3e/Socs2/Cdk1/Vac14/Pfkfb1/Cks2/Cdkn2d/Taf3/Pik3r4	46
CC	GO:0005789	endoplasmic reticulum membrane	78/2426	482/21298	0.000872967	0.0119935	0.00961556	Tbc1d20/Pgap2/Moxd1/Sgms1/Atp2a3/Gpaa1/Fkbp8/Rft1/Eda/Spink5/Ubqln4/Pnpt1/Sel1l/Scd1/Pomt1/Rhbdf1/Syvn1/Gm12185/Gm12185/Gm12185/Srebf2/Dtnbp1/Lman2/Dnajc25/Map3k5/Tmtc2/Sdf2/Rpn2/Slc35b3/Dgat1/Ptpn1/Rp9/Trdn/Dnajb2/Tap2/Slc16a11/Atl2/March1/Dpm1/Gramd1a/Pcyt1a/Gpsm1/Lrmp/Cept1/Lpin2/Gpat4/Slc35g1/Magt1/Yif1b/Irgm1/Irgm1/Irgm1/Pigb/Ern1/Pml/Emc8/Slc37a1/Insig1/Emc1/Cherp/Tmem67/Soat1/Cln3/Sppl3/Dn…	78
CC	GO:0099568	cytoplasmic region	75/2426	460/21298	0.000876	0.0119935	0.00961556	Pard3/Dynlrb1/Dlg4/Crip2/Sept10/Dcdc2b/Dctn1/Map4/Spink5/Cap1/Baiap2/Anln/Kif3a/Stxbp6/Ctsh/Flna/Sh3bp1/Fabp1/Ppp1r9a/Tctex1d4/Ncl/Gabarap/Exoc1/Akap13/Epb41/Dlc1/Dnah9/Fryl/Map1lc3b/Map2/Melk/Gpsm2/Ctnnd1/Ctnnd1/Drc3/Gck/Wdpcp/Saxo2/Hip1/Gpsm1/Nr3c2/Myrip/Psen2/Rhoq/Psen1/Zc3h14/Cenpf/Mark2/Pqbp1/Slc4a1/Tmem67/Atg16l1/Itgb2/Pde4dip/Actb/Dnah8/Phldb2/Sept8/Fry/Coro1a/Myo1f/Sept3/Pfn1/Cnksr1/Wls/C…	75
CC	GO:0098589	membrane region	63/2426	373/21298	0.000890409	0.0119935	0.00961556	Nphs2/Gnas/Lck/Casp3/Serpinh1/Cav2/Kcna3/Kras/Prnp/Kif18a/Fxyd1/Dlc1/Hyal2/Insr/Stom/Ednra/Cav3/Lamtor5/Scn5a/Adcy3/Nedd4/Atp1b1/Ptprc/Fcgr2b/Vdac2/Itga1/Eif5a/Fas/Dll1/Egfr/Rhoq/Psen1/Kcne3/Hdac6/Dysf/Atp5b/Ldlr/Slc25a5/Lamp2/Ldhb/Cln3/Efnb1/Itgb2/Actb/Sulf1/Add1/Cacna1c/Lamtor3/Atp5a1/Atp5a1/Atp2b1/Usp48/Slc27a1/Kdr/Plcd1/Nf2/Lamtor1/Eef2/Atp1a1/Cd79a/Nos1ap/Icam1/Pecam1	63
CC	GO:0005720	nuclear heterochromatin	13/2426	44/21298	0.00090362	0.0119935	0.00961556	Cbx5/Igfbp3/Esco2/Satb1/Cenpa/Cenpc1/Atrx/Kdm4b/Hist1h1b/Tcp1/Sirt6/Psip1/Eme1	13
CC	GO:0030117	membrane coat	23/2426	102/21298	0.000968455	0.0123238	0.00988036	Dab2/Cope/Chmp4b/Klhl12/Ap1s3/Sec24c/Lrrn3/A830010M20Rik/Kcnq5/Ap4b1/Vps16/Hip1/Eps15l1/Sar1a/Aak1/Ap2b1/Copa/Ap1s2/Sec13/Sec24a/Ap3b1/Copg2/Ap2m1	23
CC	GO:0048475	coated membrane	23/2426	102/21298	0.000968455	0.0123238	0.00988036	Dab2/Cope/Chmp4b/Klhl12/Ap1s3/Sec24c/Lrrn3/A830010M20Rik/Kcnq5/Ap4b1/Vps16/Hip1/Eps15l1/Sar1a/Aak1/Ap2b1/Copa/Ap1s2/Sec13/Sec24a/Ap3b1/Copg2/Ap2m1	23
CC	GO:0045121	membrane raft	61/2426	360/21298	0.000980938	0.0123238	0.00988036	Nphs2/Gnas/Lck/Casp3/Serpinh1/Cav2/Kcna3/Kras/Prnp/Kif18a/Fxyd1/Dlc1/Hyal2/Insr/Stom/Ednra/Cav3/Lamtor5/Scn5a/Adcy3/Nedd4/Atp1b1/Ptprc/Fcgr2b/Vdac2/Itga1/Fas/Dll1/Egfr/Rhoq/Psen1/Kcne3/Hdac6/Atp5b/Ldlr/Slc25a5/Lamp2/Ldhb/Cln3/Efnb1/Itgb2/Actb/Sulf1/Add1/Cacna1c/Lamtor3/Atp5a1/Atp5a1/Atp2b1/Usp48/Slc27a1/Kdr/Plcd1/Nf2/Lamtor1/Eef2/Atp1a1/Cd79a/Nos1ap/Icam1/Pecam1	61
CC	GO:0000421	autophagosome membrane	8/2426	20/21298	0.000996033	0.0123238	0.00988036	Gabarap/Rpn2/Map1lc3b/Ulk1/Lamp2/Wdr81/Atg16l1/Vmp1	8
CC	GO:0010369	chromocenter	7/2426	16/21298	0.00110859	0.0134878	0.0108136	Cbx5/Mbd5/Esco2/Tinf2/Aurkb/Cdca8/Oip5	7
CC	GO:0045171	intercellular bridge	15/2426	56/21298	0.00116123	0.0138967	0.0111414	Kif23/Agbl5/Qsox1/Kif4/Dusp11/Gstm1/Gstm5/Cenpc1/Tpx2/Haus3/Mtus2/Fan1/Ncaph2/Sra1/Cdca8	15
CC	GO:0005764	lysosome	69/2426	422/21298	0.00127482	0.01501	0.012034	Clec16a/Clcn7/Got1/Sidt2/Plbd1/H2-Ob/Atraid/Ctsh/Gabarap/Rab14/Stx3/Nprl3/Hyal2/Nppa/Gns/Slc17a2/Map1lc3b/Trip10/Myo5a/Dnase2a/Neu1/Lamtor5/Cyb561a3/Gzmb/H2-DMb1/Snapin/March1/Fgfr3/Snap23/Vps16/Shkbp1/Dram2/Mmp13/Sqstm1/Irgm1/Irgm1/Irgm1/Psen1/Scarb2/Znrf1/Ctsl/Rnf152/Hyal1/Prf1/Ldlr/Tlr7/Lamp2/Borcs8/Wdr81/Mcoln2/Cln3/Chid1/H2-Aa/Gimap5/Sort1/Acp5/Stx8/Cd74/Tlr9/Arsb/Sec13/Zc3hav1/Lamtor1/Mt1/S…	69
CC	GO:0045177	apical part of cell	68/2426	415/21298	0.00130097	0.0150747	0.0120858	Cd44/Dab2/Pard3/Ptk2/Atp6v0a4/Abcg3/Patj/Gpihbp1/Gjb6/Vldlr/Eda/Fn1/Fabp1/Rab14/Exoc1/Mgst1/Slc12a2/Stx3/Fxyd1/Hyal2/Slc19a1/Vangl2/Gpsm2/Cacna1d/Cacnb3/Hsd11b1/Prkaa1/Cd81/Atp1b1/Cldn4/Slc1a1/Fat1/Dram2/Slc29a1/Slc4a7/Fas/Myrip/Dll1/Psen2/Srr/Ano1/Egfr/Ager/Amotl2/Afdn/Cd9/Ctsl/Aspm/Ldlr/Slco2b1/Atp2b1/Birc5/Slc26a6/Slc26a6/Dpep1/Pappa2/Tlr9/Dvl2/Rapgef3/Anxa4/Nf2/C5ar1/Rab27a/Atp1a1/Rapgef6/Nin…	68
CC	GO:0005938	cell cortex	52/2426	300/21298	0.00134037	0.0152455	0.0122228	Pard3/Dlg4/Crip2/Sept10/Dcdc2b/Dctn1/Spink5/Cap1/Anln/Stxbp6/Flna/Sh3bp1/Fabp1/Ppp1r9a/Ncl/Exoc1/Akap13/Epb41/Dlc1/Fryl/Melk/Gpsm2/Ctnnd1/Ctnnd1/Gck/Hip1/Gpsm1/Nr3c2/Myrip/Psen2/Rhoq/Psen1/Mark2/Slc4a1/Pde4dip/Actb/Phldb2/Sept8/Fry/Coro1a/Myo1f/Sept3/Pfn1/Cnksr1/Cfl1/Dvl2/Rapgef3/Myl12a/Rhoa/Myh9/Nf2/Zhx3	52
CC	GO:0000323	lytic vacuole	69/2426	423/21298	0.00135748	0.0152455	0.0122228	Clec16a/Clcn7/Got1/Sidt2/Plbd1/H2-Ob/Atraid/Ctsh/Gabarap/Rab14/Stx3/Nprl3/Hyal2/Nppa/Gns/Slc17a2/Map1lc3b/Trip10/Myo5a/Dnase2a/Neu1/Lamtor5/Cyb561a3/Gzmb/H2-DMb1/Snapin/March1/Fgfr3/Snap23/Vps16/Shkbp1/Dram2/Mmp13/Sqstm1/Irgm1/Irgm1/Irgm1/Psen1/Scarb2/Znrf1/Ctsl/Rnf152/Hyal1/Prf1/Ldlr/Tlr7/Lamp2/Borcs8/Wdr81/Mcoln2/Cln3/Chid1/H2-Aa/Gimap5/Sort1/Acp5/Stx8/Cd74/Tlr9/Arsb/Sec13/Zc3hav1/Lamtor1/Mt1/S…	69
CC	GO:0044452	nucleolar part	35/2426	183/21298	0.00144	0.0159273	0.0127694	Dab2/Fblim1/Nuak1/Imp4/Kdm4a/Terf1/Ube2n/Zfp385b/Ncl/Kdm5d/Hoxb5/Polr1c/Nfic/Pak6/Ip6k1/Ipo11/Dusp11/Nfib/Dclre1a/Selenbp1/Taf1d/Ddx11/Chd1/Sirt7/Orc6/Pax5/Ager/Mri1/Rae1/Malt1/Pwp2/Snrpb2/Wdr36/Map3k14/Nol11	35
CC	GO:0005776	autophagosome	17/2426	69/21298	0.0015498	0.016284	0.0130554	Atg12/Ubqln4/Gabarap/Rpn2/Map1lc3b/Peg3/Ulk1/Sqstm1/Irgm1/Irgm1/Irgm1/Lamp2/Wdr81/Atg16l1/Cln3/Zfyve1/Vmp1	17
CC	GO:0000786	nucleosome	20/2426	87/21298	0.00157241	0.016284	0.0130554	Hist1h3a/Hist1h4f/Shprh/Hist1h1a/Hist1h2bb/Cenpa/Hist1h2af/Hist1h3c/Hist2h3b/Hist1h2bk/Hist1h2ah/Hist1h4b/Hist1h3h/Hist2h3c2/Hist2h3c1/Hist1h3g/Hist1h2bm/Hist1h1b/Irf4/Hist1h3i	20
CC	GO:0032432	actin filament bundle	20/2426	87/21298	0.00157241	0.016284	0.0130554	Fblim1/Ptk2/Mprip/Ablim1/Flna/Fam107a/Dlc1/Vangl2/Pxn/Rflnb/Pdlim7/Pls3/Palld/Actb/Synpo/Myh11/Cfl1/Myl12a/Myh9/Zyx	20
CC	GO:0045335	phagocytic vesicle	20/2426	87/21298	0.00157241	0.016284	0.0130554	Cybb/Actg1/Rab14/Pld4/Pld4/Irgm1/Irgm1/Irgm1/Slamf1/Capg/Tlr7/Lamp2/Stxbp4/Syk/Coro1a/Stx8/Tlr9/Cdc42ep4/Zyx/Syt7	20
CC	GO:0005811	lipid droplet	19/2426	81/21298	0.00158379	0.016284	0.0130554	Ldah/Cav2/Atg2a/Atg2a/Pitpnm1/Pitpnm1/Stard13/Spast/Traf6/Spg20/Tmem135/Abhd4/Plin2/Alox15/Cidec/Rab3gap1/Ehd1/Ehd1/Plin1	19
CC	GO:0001726	ruffle	29/2426	145/21298	0.00175623	0.0173589	0.0139172	Frmd4b/Pak1/Gnas/Plekha1/Spata13/Cit/Kif18a/Fam107a/Dlc1/Cyth2/Myo5a/Nme2/Map2/Pdlim7/Fgd2/Sh2b1/Rac1/Fgd1/Palld/Inpp5j/S100a6/Tiam1/Eps8l2/Abl1/Rhoa/Myh9/Nf2/Pecam1/Sh3yl1	29
CC	GO:0009295	nucleoid	13/2426	47/21298	0.001768	0.0173589	0.0139172	Dhx30/Lrpprc/Tufm/Dna2/Vdac2/Tfam/Atp5b/Slc25a5/Hadha/Ssbp1/Atad3a/Hadhb/Tefm	13
CC	GO:0042645	mitochondrial nucleoid	13/2426	47/21298	0.001768	0.0173589	0.0139172	Dhx30/Lrpprc/Tufm/Dna2/Vdac2/Tfam/Atp5b/Slc25a5/Hadha/Ssbp1/Atad3a/Hadhb/Tefm	13
CC	GO:0005770	late endosome	36/2426	192/21298	0.00178345	0.0173589	0.0139172	Vipas39/Tmem230/Clec16a/Rab14/Snf8/Myo5a/Lamtor5/Cyb561a3/H2-Ab1/March1/Vps16/Ticam2/Egfr/Irgm1/Irgm1/Irgm1/Dysf/Lrat/Ldlr/Lamp2/Wdr81/Cln3/Lamtor3/Chid1/Kidins220/Stard3/Stx8/Baiap3/Cd74/Stard3nl/Zc3hav1/Lamtor1/Osbpl1a/Rab27a/Cd79a/Pik3r4	36
CC	GO:0044754	autolysosome	6/2426	13/21298	0.00182849	0.0175631	0.0140809	Map1lc3b/Sqstm1/Irgm1/Irgm1/Irgm1/Lamp2	6
CC	GO:0005681	spliceosomal complex	35/2426	187/21298	0.00211138	0.020017	0.0160482	Dhx8/Rbm5/Hnrnpc/Luc7l/Zcchc8/Syf2/Hnrnpr/Raly/Rnpc3/Rbm41/Srrm2/Snrpe/Rbm17/Srsf2/Sf3b3/Ddx23/U2af1l4/Hnrnpu/Hnrnpu/Ddx5/BC005624/Snw1/Luc7l3/Lsm8/Mfap1b/Sf3b1/Prpf4b/Srrm1/Rbm28/Pnn/Pabpc1/Snrpb2/Snrnp70/Gcfc2/Snrpb	35
CC	GO:0031902	late endosome membrane	13/2426	48/21298	0.00217573	0.0203626	0.0163253	Snf8/Lamtor5/Cyb561a3/March1/Lamp2/Wdr81/Lamtor3/Stard3/Stx8/Baiap3/Stard3nl/Lamtor1/Rab27a	13
CC	GO:0031234	extrinsic component of cytoplasmic side of plasma membrane	21/2426	96/21298	0.00234437	0.0214337	0.0171841	Dlg4/Mcf2l/Gnas/Lck/Srms/Racgap1/Cav2/Kras/Cyld/Cnr2/Gramd1a/Hip1/Gngt2/Gng12/Alox15/Errfi1/Gng8/S100a6/Tiam1/Rhoa/Blk	21
CC	GO:0044448	cell cortex part	36/2426	195/21298	0.0023489	0.0214337	0.0171841	Dlg4/Sept10/Dcdc2b/Dctn1/Cap1/Anln/Stxbp6/Flna/Sh3bp1/Fabp1/Ppp1r9a/Exoc1/Akap13/Epb41/Dlc1/Gpsm2/Ctnnd1/Ctnnd1/Gck/Hip1/Nr3c2/Myrip/Mark2/Slc4a1/Pde4dip/Actb/Phldb2/Sept8/Coro1a/Myo1f/Sept3/Cfl1/Rapgef3/Myl12a/Myh9/Nf2	36
CC	GO:0015629	actin cytoskeleton	74/2426	470/21298	0.0024483	0.0220649	0.0176901	Fblim1/Dhx9/Ptk2/Gas2l3/Cdc42bpb/Actg1/Pak1/Dcdc2b/Dctn1/Jup/Cap1/Baiap2/Mprip/Anln/Ablim1/Hnrnpc/Fyb/Flna/Ppp1r9a/Gabarap/Cit/Cgn/Akap13/Epb41/Itsn1/Fam107a/Dlc1/Myo5a/Map2/Vangl2/Tmod2/Pxn/Myo1g/Rflnb/Myl4/Ttc17/Gck/Pdlim7/Vps16/Gdpd2/Actr3b/Hip1/Cenpq/Myrip/Rhoq/Cdc42bpa/Twf2/Rac1/Tpm1/Gng12/Mark2/Pls3/Palld/Actb/Add1/Synpo/Coro1a/Myo1f/Myh11/Sra1/Carmil1/Abl1/Kntc1/Cfl1/Fermt3/Rapgef3/Myl12a/…	74
CC	GO:0062023	collagen-containing extracellular matrix	55/2426	331/21298	0.00262204	0.0230961	0.0185169	Eln/Mfap5/Fam20b/Adamts8/Spon1/Vwa5a/Cd151/Gpc6/Serpinh1/Col14a1/F13a1/Adamts15/Fn1/Egfl7/Agrn/Ang/Rpsa/Mgp/Fbn1/Amtn/Col3a1/Mfap4/Timp3/Nav2/Col15a1/Mmrn1/Ltbp1/Col17a1/Col5a1/Runx1/Lama3/Plod3/Col12a1/Lamc3/Ecm1/Htra1/Bmp1/Ctsl/Adam19/Postn/Serping1/Lox/Fras1/S100a6/Anxa7/Adamtsl1/Slit2/Tinagl1/Tnc/Anxa4/Omd/Smc3/Lum/Lama4/Fbln2	55
CC	GO:0000788	nuclear nucleosome	11/2426	38/21298	0.0026406	0.0230961	0.0185169	Hist1h3a/Hist1h4f/Cenpa/Hist2h3b/Hist1h4b/Hist1h3h/Hist2h3c2/Hist2h3c1/Hist1h3g/Irf4/Hist1h3i	11
CC	GO:0044420	extracellular matrix component	13/2426	49/21298	0.00265763	0.0230961	0.0185169	Eln/Mfap5/Fbn1/Thsd4/Col3a1/Mfap4/Ltbp1/Col5a1/Lama3/Col12a1/Mfap1b/Tnc/Lum	13
CC	GO:0031461	cullin-RING ubiquitin ligase complex	30/2426	156/21298	0.00277206	0.0238071	0.0190868	Fbxl21/Ube2c/Kctd17/Arih1/Anapc16/Fbxl4/Trim21/Usp47/Klhl12/Trpc4ap/Skp2/Skp2/Crbn/Cks1b/Klhl25/Dtl/Anapc5/Cdc27/Amn1/Ccnf/Lrrc29/Cdc20/Fbxl3/Fbxo31/Dcaf11/Commd1/Cul2/Cks2/Glmn/Fbxo17	30
CC	GO:0045120	pronucleus	8/2426	23/21298	0.00283609	0.0240737	0.0193007	Ncapd2/Hnrnpc/Ccna2/Blm/Aurka/Hnrnpl/Cenpf/Ezh2	8
CC	GO:0019005	SCF ubiquitin ligase complex	15/2426	61/21298	0.00291736	0.0243571	0.0195279	Fbxl21/Arih1/Fbxl4/Trim21/Usp47/Skp2/Skp2/Cks1b/Amn1/Ccnf/Lrrc29/Fbxl3/Fbxo31/Cks2/Fbxo17	15
CC	GO:0031464	Cul4A-RING E3 ubiquitin ligase complex	5/2426	10/21298	0.0029362	0.0243571	0.0195279	Arih1/Trpc4ap/Crbn/Dtl/Glmn	5
CC	GO:0000792	heterochromatin	20/2426	92/21298	0.00317384	0.0260326	0.0208711	Cbx5/Kdm4a/Igfbp3/Hells/Dnmt1/Esco2/Satb1/Cenpa/Rnf20/Cenpc1/Pml/Atrx/Kdm4b/Snai1/Hist1h1b/Tcp1/Sirt6/Smarcad1/Psip1/Eme1	20
CC	GO:0005912	adherens junction	48/2426	284/21298	0.00335894	0.0272447	0.0218429	Pard3/Fblim1/Ptk2/Frmd4b/Pak1/Tgm1/Git1/Jup/Kifc3/Sh3bp1/Cav2/Wtip/Klf11/Pkp4/Tle2/Fam107a/Dlc1/Lpp/Zfp384/Itgb8/Cav3/Pxn/Ctnnd1/Ctnnd1/Ptprc/Snap23/Pdlim7/Itga1/Lama3/Ajuba/Dll1/Afdn/Pvr/Arhgap24/Senp1/Nectin4/Lims2/Cass4/Itgb2/Phldb2/Syne2/Add1/Map4k4/Myh9/Nf2/Cdc42ep4/Zyx/Camsap3	48
CC	GO:0031012	extracellular matrix	74/2426	476/21298	0.00339979	0.027273	0.0218656	Lrrc3b/Eln/Mfap5/Pkm/Fam20b/Adamts8/Spon1/Cd180/Vwa5a/Cd151/Mmp19/Gpc6/Serpinh1/Col14a1/F13a1/Adamts15/Fn1/Tsku/Egfl7/Agrn/Ang/Ptx3/Rpsa/Mgp/Fbn1/Amtn/Thsd4/Col3a1/Ndnf/Mfap4/Timp3/Phospho1/Lrrn3/Nav2/Col15a1/Mmrn1/Wnt11/Ltbp1/Col17a1/Fcgbp/Col5a1/Runx1/Lama3/Plod3/Col12a1/Lamc3/Spon2/Ecm1/Mmp13/Htra1/Bmp1/Ctsl/Adam19/Postn/Mfap1b/Serping1/Lox/Fras1/S100a6/Wnt2/Serac1/Hapln3/Anxa7/Adamtsl1/Wisp1/…	74
CC	GO:0070161	anchoring junction	50/2426	299/21298	0.00349373	0.027722	0.0222256	Pard3/Fblim1/Ptk2/Frmd4b/Pak1/Tgm1/Git1/Jup/Kifc3/Sh3bp1/Cav2/Wtip/Klf11/Pkp4/Tle2/Fam107a/Dlc1/Lpp/Zfp384/Itgb8/Cav3/Pxn/Ctnnd1/Ctnnd1/Ptprc/Snap23/Pdlim7/Itga1/Lama3/Ajuba/Dll1/Jam3/Afdn/Pvr/Arhgap24/Senp1/Nectin4/Lims2/Cass4/Itgb2/Phldb2/Syne2/Add1/Map4k4/Pnn/Myh9/Nf2/Cdc42ep4/Zyx/Camsap3	50
CC	GO:0034399	nuclear periphery	24/2426	120/21298	0.00417063	0.0327372	0.0262464	Runx1t1/Prkcd/Ipo5/Satb1/Blm/Map2/Eif6/Nrm/Lmnb1/Hnrnpu/Hnrnpu/Snw1/Cenpf/Pml/Sf3b1/Srrm1/Atf4/Gmcl1/Men1/Men1/Smc3/Fign/Psip1/Csnk2b	24
CC	GO:0044431	Golgi apparatus part	74/2426	481/21298	0.00442392	0.0341552	0.0273833	Tbc1d20/Unc50/Pgap2/Cnst/Nsf/Tmem230/Atxn2/Lyz2/Golph3/Gnas/Sgms1/Trappc4/Cope/Vps52/Arap1/Pomgnt1/Qsox1/Flna/Cux1/Rhbdf1/Cit/Man2a1/Stx5a/Bet1l/Atp2c1/Rab14/Lman2/Lrpap1/Hyal2/Scamp2/Slc35b3/Stx16/Gnptg/Man2a2/H2-Q7/March1/D230025D16Rik/Ap4b1/Pld4/Pld4/Limk2/Pqlc1/Ggta1/Plod3/Acer2/Cog4/Gpsm1/Csgalnact2/Yif1b/Naa60/Pmepa1/Atp2c2/Rac1/Hook3/Postn/Lamp2/Cln3/Scfd1/Coro7/Chid1/Map6/Syt17/Zfyve1/Man…	74
CC	GO:0071013	catalytic step 2 spliceosome	18/2426	82/21298	0.00446207	0.0341552	0.0273833	Dhx8/Hnrnpc/Zcchc8/Syf2/Hnrnpr/Raly/Sf3b3/Ddx23/Hnrnpu/Hnrnpu/Ddx5/Snw1/Sf3b1/Prpf4b/Pnn/Pabpc1/Snrpb2/Snrpb	18
CC	GO:0030055	cell-substrate junction	30/2426	161/21298	0.00449164	0.0341552	0.0273833	Fblim1/Ptk2/Pak1/Git1/Cav2/Klf11/Tle2/Fam107a/Dlc1/Lpp/Zfp384/Itgb8/Cav3/Pxn/Col17a1/Ptprc/Pdlim7/Itga1/Lama3/Ajuba/Arhgap24/Senp1/Lims2/Cass4/Itgb2/Phldb2/Syne2/Map4k4/Myh9/Zyx	30
CC	GO:0009897	external side of plasma membrane	63/2426	399/21298	0.0045863	0.0345155	0.0276721	Cd44/Icos/Fcmr/Klrc1/Gpihbp1/Tnfrsf22/Xcr1/Klrb1b/Klrk1/Cxcr5/Antxr1/Btla/Slamf7/Cxcr3/Map3k5/Itga3/Klrb1c/Tnfrsf13c/Ackr4/Hyal2/Insr/Cd248/Tnfrsf11a/Cd19/H2-Ab1/H2-Q7/Flt3/Htr2c/Ms4a1/Ptprc/Fcer2a/Fcgr2b/Ccrl2/Itga1/Itgae/Fas/Tnfrsf13b/Tnfrsf4/Ano1/Ager/Cd9/Ctsl/Klrd1/Slamf1/Ccr2/Sdc1/Tlr8/Ldlr/Folr2/Ccr5/Wnt2/H2-Aa/Cd74/Il2rg/Ly6a/Kdr/Ulbp1/Ulbp1/Fcgr3/Cd79a/Gfra4/Icam1/Pecam1	63
CC	GO:0043296	apical junction complex	27/2426	141/21298	0.00464618	0.0346093	0.0277473	Pard3/Ect2/F11r/Frmd4b/Patj/Kifc3/Sh3bp1/Nphp1/Traf4/Cgn/Ccnd1/Tacstd2/Cyth2/Ctnnd1/Ctnnd1/Cldn4/Cldn23/Jam3/Amotl2/Afdn/Cdk4/Frmd4a/Nectin4/Usp53/Synpo/Rhoa/Camsap3	27
CC	GO:0005925	focal adhesion	28/2426	148/21298	0.00475921	0.0350932	0.0281353	Fblim1/Ptk2/Pak1/Git1/Cav2/Klf11/Tle2/Fam107a/Dlc1/Lpp/Zfp384/Itgb8/Cav3/Pxn/Ptprc/Pdlim7/Itga1/Ajuba/Arhgap24/Senp1/Lims2/Cass4/Itgb2/Phldb2/Syne2/Map4k4/Myh9/Zyx	28
CC	GO:0042641	actomyosin	19/2426	89/21298	0.00489362	0.0357234	0.0286405	Fblim1/Ptk2/Cdc42bpb/Mprip/Ablim1/Fam107a/Dlc1/Myo5a/Vangl2/Pxn/Pdlim7/Cdc42bpa/Palld/Actb/Synpo/Myh11/Myl12a/Myh9/Zyx	19
CC	GO:0032154	cleavage furrow	11/2426	41/21298	0.00503431	0.0362611	0.0290716	Ect2/Racgap1/Wdr73/Cit/Cenpc1/Mastl/Men1/Men1/Rhoa/Myh9/Nf2	11
CC	GO:0044309	neuron spine	35/2426	197/21298	0.00506661	0.0362611	0.0290716	Ptk2/Dlg4/Baiap2/Ncoa2/Ppp1r9a/Eea1/Dtnbp1/Itsn1/Arrb1/Rgs10/Eef2k/Apba3/Ctnnd1/Ctnnd1/Nedd4/Psmc2/Dock10/Shank1/Fcgr2b/Akap5/Usp50/Rac1/Epha4/Ppp1r1b/Rgs7bp/Mtmr2/Sipa1l1/Tiam1/Add1/Synpo/Atp2b1/Dnm3/Gria3/Cfl1/Rhoa	35
CC	GO:0016324	apical plasma membrane	51/2426	314/21298	0.00578865	0.0410264	0.0328921	Cd44/Dab2/Pard3/Ptk2/Atp6v0a4/Abcg3/Gpihbp1/Gjb6/Fn1/Rab14/Exoc1/Slc12a2/Stx3/Fxyd1/Hyal2/Slc19a1/Vangl2/Cacna1d/Cacnb3/Prkaa1/Cd81/Atp1b1/Cldn4/Slc1a1/Fat1/Dram2/Slc29a1/Slc4a7/Fas/Myrip/Dll1/Psen2/Ano1/Egfr/Ager/Amotl2/Cd9/Aspm/Slco2b1/Atp2b1/Birc5/Slc26a6/Slc26a6/Pappa2/Tlr9/Anxa4/Rab27a/Atp1a1/Rapgef6/Pdgfrb/F2rl2	51
CC	GO:0000407	phagophore assembly site	9/2426	31/21298	0.00619661	0.0434746	0.0348549	Atg12/Ulk2/Atg2a/Atg2a/Ulk1/Sqstm1/Zfyve1/Vmp1/Atg7	9
CC	GO:0030175	filopodium	19/2426	91/21298	0.00628974	0.0434746	0.0348549	Ppp1r9a/Spata13/Antxr1/Itga3/Nptxr/Myo5a/Map2/Myo1g/Fat1/Akap5/Cib1/Twf2/Epha4/Rufy3/Palld/Syne2/Cfl1/Rapgef3/Nf2	19
CC	GO:0005767	secondary lysosome	6/2426	16/21298	0.00631276	0.0434746	0.0348549	Map1lc3b/Sqstm1/Irgm1/Irgm1/Irgm1/Lamp2	6
CC	GO:0005753	mitochondrial proton-transporting ATP synthase complex	7/2426	21/21298	0.00675225	0.0456402	0.0365911	Atp5k/Atp5g3/Atp5j2/Atp5b/Atp5a1/Atp5a1/Ppif	7
CC	GO:0042611	MHC protein complex	7/2426	21/21298	0.00675225	0.0456402	0.0365911	H2-Ob/H2-DMb1/H2-Ab1/H2-Q7/H2-Aa/Cd74/H2-T23	7
CC	GO:0043197	dendritic spine	34/2426	194/21298	0.00701725	0.0469963	0.0376784	Ptk2/Dlg4/Baiap2/Ncoa2/Ppp1r9a/Dtnbp1/Itsn1/Arrb1/Rgs10/Eef2k/Apba3/Ctnnd1/Ctnnd1/Nedd4/Psmc2/Dock10/Shank1/Fcgr2b/Akap5/Usp50/Rac1/Epha4/Ppp1r1b/Rgs7bp/Mtmr2/Sipa1l1/Tiam1/Add1/Synpo/Atp2b1/Dnm3/Gria3/Cfl1/Rhoa	34
MF	GO:0008017	microtubule binding	67/2367	235/20759	5.54207e-13	6.05194e-10	5.23871e-10	Kif23/Fnta/Prc1/Kif11/Kif11/Gas2l3/Nusap1/Kif2c/Terf1/Dctn1/Plk1/Racgap1/Map4/Mid2/Kifc3/Kif3a/Cetn3/Mtus1/Mdm1/Stard9/Spag5/Gabarap/Kif4/Prnp/Kif18a/Cgn/Hook1/Fam83d/Kif15/Spast/Map1lc3b/Hdgfl3/Kif24/Map2/Kif1a/Cep57/Kif21b/Zfp207/Saxo2/Eml1/Mark4/Clip1/Hdac6/Dysf/Kif18b/Kifc1/Hook3/Kif1b/Efcab11/Kif22/Ska2/Mtus2/Kif26b/Tiam1/Map4k4/Map6/Birc5/Dnm3/Nde1/Fam161a/Psrc1/Mid1/Kif20b/Cep57l1/Map1a/Ce…	67
MF	GO:0015631	tubulin binding	77/2367	327/20759	3.41707e-10	1.86572e-07	1.61501e-07	Kif23/Fnta/Prc1/Kif11/Kif11/Gas2l3/Agbl5/Gnas/Nusap1/Kif2c/Terf1/Dctn1/Plk1/Racgap1/Map4/Lrpprc/Mid2/Kifc3/Kif3a/Cetn3/Mtus1/Mdm1/Stard9/Spag5/Gabarap/Kif4/Prnp/Kif18a/Cgn/Hook1/Fam83d/Kif15/Spast/Map1lc3b/Hdgfl3/Kif24/Map2/Cav3/Kif1a/Cep57/Kif21b/Zfp207/Saxo2/Eml1/Mark4/Ino80/Brca2/Clip1/B9d2/Hdac6/Dysf/Kif18b/Kifc1/Hook3/Kif1b/Efcab11/Kif22/Ska2/Mtus2/Kif26b/Tiam1/Map4k4/Map6/Birc5/Dnm3/Nde1/Rg…	77
MF	GO:0008022	protein C-terminus binding	55/2367	239/20759	2.462e-07	8.96168e-05	7.75746e-05	Dab2/Nsf/Dlg4/Atxn2/Hcn1/Rad51/Hic2/Lck/Terf1/Fn1/Ppp1r9a/Ncl/Top2a/Srebf2/Pparg/Homer3/Snf8/Ppp2ca/Prrc2c/Epb41/Dgkz/Mki67/Cav3/Med12/Gpsm2/Ciita/Ywhab/Nedd4/Prkaa1/Atp1b1/Rabac1/Shank1/Sdcbp2/Cib1/Ecm1/Brca2/Pxk/Gopc/Snx17/Zbtb16/Mapk14/Cenpf/Calcoco1/Sdc1/Pqbp1/Slc4a1/Sh3gl2/Cdc20/Atf4/Coro1a/Pabpc1/Abl1/Rab3a/Rab3a/Fign	55
MF	GO:0031267	small GTPase binding	80/2367	425/20759	4.12024e-06	0.00112134	0.000970662	Tbc1d30/Ect2/Tbc1d20/Ranbp2/Nsf/Clec16a/Mcf2l/Cdc42bpb/Rab3il1/Pak1/Nxt1/Appl2/Trappc4/Vps52/Git1/Iqgap3/Anln/Kif3a/Stxbp6/Ipo5/Flna/Sh3bp1/Ipo9/Spata13/Cit/Madd/Exoc1/Pak6/Akap13/Mapkap1/Itsn1/Diaph3/Ipo11/Tbc1d10b/Myo5a/Arhgef1/Rabgap1/Rabggta/Plce1/Tbck/Trio/Dock10/Plekhg2/Dock7/Cib1/Strip1/Ralgps1/Ulk1/Myrip/Prkch/Ipo8/Afdn/Fgd2/Arhgef28/Rac1/Fgd1/Arhgef25/Rnf152/Errfi1/Tbc1d10a/Tbc1d17/Rab11…	80
MF	GO:0019902	phosphatase binding	47/2367	213/20759	6.06265e-06	0.00112134	0.000970662	Pard3/Ptk2/Cnst/Dlg4/Eif4ebp1/Lck/Stat1/Jup/Kif3a/Ppp1r9a/Tctex1d4/Mvp/Jak3/Pparg/Map3k5/Nfatc2/Trpc4ap/Ppp2ca/Insr/Nptxr/Ptpn1/Cep192/Pxn/Siglecg/Cabin1/Dzip3/Gck/Itga1/Akap5/Wnk1/Terf2ip/Anapc5/Egfr/Ppp1r35/Dab2ip/Mapk14/Cdc27/Ikbkb/Grb2/Syk/Traf3/Cacna1c/Cfl1/Ap3b1/Pecam1/Sh3yl1/Vrk3	47
MF	GO:0017016	Ras GTPase binding	77/2367	409/20759	6.16122e-06	0.00112134	0.000970662	Tbc1d30/Ect2/Tbc1d20/Ranbp2/Nsf/Clec16a/Mcf2l/Cdc42bpb/Rab3il1/Pak1/Nxt1/Appl2/Trappc4/Vps52/Iqgap3/Anln/Kif3a/Stxbp6/Ipo5/Flna/Sh3bp1/Ipo9/Spata13/Cit/Madd/Exoc1/Pak6/Akap13/Mapkap1/Itsn1/Diaph3/Ipo11/Tbc1d10b/Myo5a/Arhgef1/Rabgap1/Rabggta/Plce1/Tbck/Trio/Dock10/Plekhg2/Dock7/Cib1/Strip1/Ralgps1/Ulk1/Myrip/Prkch/Ipo8/Afdn/Fgd2/Arhgef28/Rac1/Fgd1/Arhgef25/Tbc1d10a/Tbc1d17/Rab11fip1/Tiam1/Rab3gap1…	77
MF	GO:0003712	transcription coregulator activity	84/2367	459/20759	7.43058e-06	0.00115917	0.00100341	Runx1t1/Dhx9/Sap30/Bhlhe41/Mcidas/Cnot7/Med13l/Mef2a/E2f8/Tmem179b/Nr1h2/Kdm5a/Jup/Ncoa2/Med21/Brca1/Gata3/Wtip/Arid5b/Prkcb/Pparg/Mysm1/Bcl11a/Ccnd1/Zfp366/Tfdp2/Tle2/Pdlim1/Helz2/Hinfp/Smarca2/Raly/Hyal2/Thrap3/Nfib/Casp8ap2/Lpin3/Mms19/Med12/Aes/Rnf20/Sox11/Zfp451/Drap1/Meis2/Ddx54/Ncor1/Ajuba/Rbm39/Trp53bp1/Bcor/Nmi/Lpin2/Sqstm1/Hnrnpu/Hnrnpu/Ddx5/Snw1/Usp21/Trib3/Ncoa7/Calcoco1/Hey1/Pml/Pou2…	84
MF	GO:0004674	protein serine/threonine kinase activity	84/2367	464/20759	1.13428e-05	0.00154829	0.00134024	Nuak1/Bub1b/Camk1/Cdc42bpb/Chuk/Tlk1/Pak1/Phkb/Cdkl2/Plk1/Ulk2/Clk4/Map4k1/Prkcd/Ccnh/Srpk3/Stk38/Stk36/Cit/Prkcb/Map3k5/Pak6/Ccnd1/Gsk3a/Csnk1e/Akap13/Cdkn1a/Map3k20/Clk1/Nme2/Aurka/Csnk1a1/Melk/Eef2k/Cdk8/Trio/Prkaa1/Cdk9/Bub1/Limk2/Sgk3/Snrk/Chek2/Wnk1/Nrbp1/Srpk2/Ulk1/Mark4/Phka1/Prkch/Ikbke/Cdc42bpa/Haspin/Mapk14/Adck1/Cdk4/Mark2/Ikbkb/Ern1/Camk2g/Ccnd3/Mastl/Pdk2/Smg1/Prpf4b/Mknk2/Atr/Syk/M…	84
MF	GO:0016538	cyclin-dependent protein serine/threonine kinase regulator activity	16/2367	45/20759	1.95477e-05	0.00237179	0.00205308	Ccne2/Ccne1/Casp3/Ccnh/Ccnb1/Cdkn2c/Ccnd1/Cdkn1a/Cks1b/Ccna2/Ccno/Ccnb2/Ccnf/Ccnd3/Cks2/Cdkn2d	16
MF	GO:0043021	ribonucleoprotein complex binding	35/2367	150/20759	2.60081e-05	0.00284008	0.00245845	Unk/Cbx5/Dhx9/Pttg1/Nmd3/Hnrnpc/Ybx3/Snd1/Rpsa/Naa16/Stau2/Rpn2/Snrpe/Slfn14/Slfn14/Slfn14/Slfn14/Eif6/Eif5a/Hnrnpu/Hnrnpu/Eif3c/Ddx5/Rictor/Pqbp1/Maip1/Prmt1/Cpsf6/Snrpb2/Abcf1/Snrnp70/Snrpb/Eef2/Ezh2/Csnk2b	35
MF	GO:0003697	single-stranded DNA binding	27/2367	105/20759	3.50685e-05	0.00348135	0.00301354	Dhx9/Rad51/Rpa1/Cnbp/Terf1/Lrpprc/Neil3/Msh3/Ncl/Ybx3/Rad51ap1/Blm/Smc2/Ssbp3/Gen1/Polr3c/Ddx11/Mcm7/Pcbp2/Terf2ip/Tsn/Jchain/Brca2/Hnrnpu/Hnrnpu/Ssbp1/Nabp1	27
MF	GO:0060589	nucleoside-triphosphatase regulator activity	57/2367	296/20759	4.92506e-05	0.00448181	0.00387957	Tbc1d30/Ect2/Tbc1d20/Ranbp2/Agfg1/Arap1/Racgap1/Git1/Rgs12/Chn2/Arhgap39/Sh3bp1/Ric8b/Gapvd1/Depdc1b/Nckap1l/Agrn/Depdc1a/Nprl3/Dlc1/Arrb1/Stard13/Tbc1d10b/Smap2/Rin2/Arhgef1/Rabgap1/Rgs10/Wnt11/Dnajb2/Tbck/Gpsm2/Atp1b1/Acap3/Gpsm1/Ric8a/Gopc/Dab2ip/Arhgap24/Tbc1d10a/Fam13b/Arhgap42/Sipa1l1/Tbc1d17/Arhgap19/Rab3gap1/Atpif1/Pfn1/Grpel2/Rgs2/Slit2/Plcb1/Rab3a/Rab3a/Tor1aip1/Agfg2/Arhgap25	57
MF	GO:0019787	ubiquitin-like protein transferase activity	74/2367	417/20759	7.20017e-05	0.00604814	0.00523543	Huwe1/Ranbp2/Smurf1/Chfr/Rfwd3/Fbxl21/Ube2c/Mkrn1/Bard1/Rchy1/Arih1/Rnf103/Ube2f/Ube2n/Fbxl4/Med21/Brca1/Tmem129/Eloc/Trim21/Rnf141/Trim12a/Syvn1/Shprh/Skp2/Skp2/Rc3h2/Rnf167/Ttc3/Lrsam1/Dtl/Med12/Ube2o/Rnf20/Cdk8/Traf6/Rbck1/Peli3/Nedd4/Zfp451/March1/Trim47/Trim59/Dzip3/Rnf170/Nhlrc1/Bcor/Anapc5/Herc6/Ube2e2/Rlim/Znrf1/G2e3/Jade2/Amn1/Sumo3/Ccnf/Pja1/Lrrc29/Pml/Rnf152/Ube2t/Peli2/Malt1/Fbxl3/Nhl…	74
MF	GO:0019903	protein phosphatase binding	36/2367	166/20759	0.000102857	0.00777105	0.00672682	Pard3/Ptk2/Dlg4/Eif4ebp1/Lck/Stat1/Jup/Kif3a/Ppp1r9a/Tctex1d4/Mvp/Jak3/Pparg/Map3k5/Ppp2ca/Insr/Nptxr/Ptpn1/Pxn/Cabin1/Gck/Itga1/Akap5/Anapc5/Egfr/Dab2ip/Mapk14/Cdc27/Ikbkb/Grb2/Traf3/Cacna1c/Cfl1/Ap3b1/Pecam1/Vrk3	36
MF	GO:0003779	actin binding	73/2367	415/20759	0.000106745	0.00777105	0.00672682	Ptk2/Gas2l3/Cap1/Mprip/Anln/Ablim1/Flna/Coro2b/Ppp1r9a/Lsp1/Epb41l1/Antxr1/Kif18a/Ssh3/Ang/Hook1/Epb41/Coro2a/Fam107a/Diaph3/Myo5a/Map2/Tmod2/Myo1g/Myl4/Rcsd1/Akap5/Vps16/Actr3b/Ajuba/Hip1/Myrip/Ino80/Pxk/Hnrnpu/Hnrnpu/Egfr/Fxyd5/Afdn/Flii/Twf2/Hdac6/Tpm1/Adssl1/Gmfg/Gmfb/Capg/Epb41l3/Pls3/Palld/Slc4a1/Sipa1l1/Syne2/Add1/Coro7/Ccr5/Synpo/Coro1a/Myo1f/Fmnl2/Myh11/Pfn1/Rusc1/Mkl2/Eps8l2/Abl1/Gcsam/…	73
MF	GO:0003777	microtubule motor activity	22/2367	84/20759	0.000134606	0.00881639	0.00763169	Kif23/Kif11/Kif11/Kif2c/Kifc3/Kif3a/Stard9/Kif4/Kif18a/Kif15/Dnah9/Kif24/Kif1a/Kif21b/Kif18b/Kifc1/Kif1b/Kif22/Kif26b/Dnah8/Kif20b/Cenpe	22
MF	GO:0004519	endonuclease activity	29/2367	125/20759	0.000137251	0.00881639	0.00763169	Slfn8/Slfn8/Slfn8/Zc3h12d/Fen1/Snd1/Ang/Rnase1/Slfn9/Slfn9/Slfn9/Slfn9/Dnase2a/Slfn14/Slfn14/Slfn14/Slfn14/Gen1/Dna2/N4bp2/Tsn/Rnase4/Ern1/Ankle1/Fan1/Mus81/Rnaseh2a/Elac1/Eme1	29
MF	GO:0070064	proline-rich region binding	9/2367	20/20759	0.000165969	0.0100688	0.00871581	Baiap2/Ccnd1/Itsn1/Cyld/Sh3d19/Nedd4/Rabac1/Pfn1/Abl1	9
MF	GO:0003774	motor activity	30/2367	133/20759	0.00018128	0.0104189	0.00901883	Kif23/Dynlrb1/Kif11/Kif11/Kif2c/Dctn1/Kifc3/Kif3a/Stard9/Kif4/Kif18a/Cgn/Kif15/Dnah9/Kif24/Myo5a/Myo1g/Kif1a/Kif21b/Kif18b/Kifc1/Kif1b/Kif22/Kif26b/Dnah8/Myo1f/Myh11/Myh9/Kif20b/Cenpe	30
MF	GO:0016887	ATPase activity	74/2367	432/20759	0.000223644	0.0116234	0.0100615	Dhx30/Kif23/Dhx9/Atad2/Atad2/Nsf/Atp6v0a4/Kif11/Kif11/Dhx8/Abcg3/Rad51/Kif2c/Atp2a3/Rad54b/Ccnh/Kifc3/Kif3a/Atp6v1h/Msh3/Stard9/Top2a/Atp5g3/Kif4/Atp2c1/Kif18a/Abcc3/Kif15/Helz2/Smarca2/Spast/Dnah9/Kif24/Blm/Ercc6l/Dhx34/Dna2/Tap2/Ddx11/Mcm7/Rfc5/Psmc2/Atp1b1/Kif1a/Ddx54/Kif21b/Ino80/Ddx5/Ipo8/Atp6v0a2/Atp2c2/Kif18b/Kifc1/Atp5j2/Atp5b/Kif1b/Kif22/Polq/Atrx/Dnah8/Brip1/Atp5a1/Atp5a1/Abcf3/Atp2b1/A…	74
MF	GO:0004842	ubiquitin-protein transferase activity	69/2367	397/20759	0.000233341	0.0116234	0.0100615	Huwe1/Smurf1/Chfr/Rfwd3/Fbxl21/Ube2c/Mkrn1/Bard1/Rchy1/Arih1/Rnf103/Ube2n/Fbxl4/Med21/Brca1/Tmem129/Eloc/Trim21/Rnf141/Trim12a/Syvn1/Shprh/Skp2/Skp2/Rc3h2/Rnf167/Ttc3/Lrsam1/Dtl/Med12/Ube2o/Rnf20/Cdk8/Traf6/Rbck1/Peli3/Nedd4/March1/Trim47/Trim59/Dzip3/Rnf170/Nhlrc1/Bcor/Anapc5/Herc6/Ube2e2/Rlim/Znrf1/G2e3/Jade2/Amn1/Ccnf/Pja1/Lrrc29/Rnf152/Ube2t/Peli2/Malt1/Fbxl3/Nhlrc3/Rnf144b/Fbxo31/Med31/Cul2/…	69
MF	GO:0019207	kinase regulator activity	39/2367	192/20759	0.000234171	0.0116234	0.0100615	Ccne2/Ccne1/Spred2/Casp3/Itprip/Ccnh/Ccnb1/Cdkn2c/Nckap1l/Ccnd1/Nck1/Itsn1/Cdkn1a/Hyal2/Cks1b/Ccna2/Wnt11/Sh3bp5/Ccno/Ccnb2/Cib1/Wnk1/Qars/Fgfr1op/Trib3/Trib1/Ccnf/Ccnd3/Wdr81/Malt1/Socs2/Lamtor3/Kidins220/Vac14/Cks2/Cdkn2d/Dbf4/Parp16/Csnk2b	39
MF	GO:0004521	endoribonuclease activity	18/2367	65/20759	0.000252049	0.0119669	0.0103588	Slfn8/Slfn8/Slfn8/Fen1/Snd1/Rnase1/Slfn9/Slfn9/Slfn9/Slfn9/Slfn14/Slfn14/Slfn14/Slfn14/Tsn/Ern1/Rnaseh2a/Elac1	18
MF	GO:0030695	GTPase regulator activity	48/2367	256/20759	0.000354228	0.0161174	0.0139516	Tbc1d30/Ect2/Tbc1d20/Ranbp2/Agfg1/Arap1/Racgap1/Git1/Rgs12/Chn2/Arhgap39/Sh3bp1/Ric8b/Gapvd1/Depdc1b/Nckap1l/Depdc1a/Nprl3/Dlc1/Arrb1/Stard13/Tbc1d10b/Smap2/Rin2/Arhgef1/Rabgap1/Rgs10/Wnt11/Tbck/Gpsm2/Acap3/Gpsm1/Ric8a/Gopc/Dab2ip/Arhgap24/Tbc1d10a/Fam13b/Arhgap42/Sipa1l1/Tbc1d17/Arhgap19/Rab3gap1/Rgs2/Slit2/Plcb1/Agfg2/Arhgap25	48
MF	GO:0004518	nuclease activity	39/2367	197/20759	0.000403512	0.0176254	0.015257	Cnot7/Slfn8/Slfn8/Slfn8/Cnot8/Zc3h12d/Pnpt1/Fen1/Pole/Snd1/Ang/Rnase1/Slfn9/Slfn9/Slfn9/Slfn9/Toe1/Dclre1a/Pan3/Dnase2a/Slfn14/Slfn14/Slfn14/Slfn14/Gen1/Dna2/N4bp2/Tsn/Rnase4/Ern1/Ankle1/Fan1/Dffb/Pgap1/Mus81/Rnaseh2a/Elac1/Harbi1/Eme1	39
MF	GO:0017048	Rho GTPase binding	34/2367	165/20759	0.000432934	0.0181832	0.0157399	Ect2/Mcf2l/Cdc42bpb/Pak1/Iqgap3/Anln/Stxbp6/Flna/Sh3bp1/Spata13/Cit/Exoc1/Pak6/Akap13/Itsn1/Diaph3/Arhgef1/Trio/Dock10/Plekhg2/Dock7/Strip1/Fgd2/Arhgef28/Fgd1/Arhgef25/Tiam1/Fmnl2/Pfn1/Arhgef6/Dock11/Eps8l2/Dvl2/Cdc42ep4	34
MF	GO:0019887	protein kinase regulator activity	33/2367	159/20759	0.000455809	0.0184349	0.0159577	Ccne2/Ccne1/Spred2/Casp3/Itprip/Ccnh/Ccnb1/Cdkn2c/Nckap1l/Ccnd1/Nck1/Cdkn1a/Hyal2/Cks1b/Ccna2/Wnt11/Sh3bp5/Ccno/Ccnb2/Cib1/Wnk1/Qars/Fgfr1op/Trib3/Trib1/Ccnf/Ccnd3/Kidins220/Cks2/Cdkn2d/Dbf4/Parp16/Csnk2b	33
MF	GO:0005085	guanyl-nucleotide exchange factor activity	38/2367	192/20759	0.000477777	0.0186333	0.0161295	Ect2/Mcf2l/Rab3il1/Trappc4/Ric8b/Spata13/Madd/Gapvd1/Akap13/Itsn1/Cyth2/Flcn/Arhgef1/Lamtor5/Plce1/Trio/Dock10/Plekhg2/Dock7/Ralgps1/Ric8a/Fgd2/Arhgef28/Fgd1/Cyth4/Arhgef25/Tbc1d10a/Tiam1/Rab3gap1/Rgl3/Lamtor3/Arhgef6/Dock11/Eps8l2/Rapgef3/Lamtor1/Rapgef6/Rcc1	38
MF	GO:0004860	protein kinase inhibitor activity	15/2367	54/20759	0.000777808	0.0292885	0.0253529	Spred2/Casp3/Itprip/Cdkn2c/Nck1/Cdkn1a/Hyal2/Sh3bp5/Cib1/Wnk1/Qars/Fgfr1op/Trib3/Trib1/Cdkn2d	15
MF	GO:0001227	DNA-binding transcription repressor activity, RNA polymerase II-specific	48/2367	266/20759	0.000854686	0.0311106	0.0269301	Bhlhe41/Atf3/Nfkb1/Kdm4a/Cnbp/Zbtb20/Tshz2/Prdm5/E2f8/Kdm5a/Rbl1/Zfp131/Gata3/Kdm5d/Ybx3/Prdm1/Arid5b/Mnt/Srebf2/Pparg/Etv3/Nfatc2/Bcl11a/Lrrfip1/Hinfp/Satb1/Kdm5c/Zfp90/Ikzf5/Paxbp1/Cc2d1b/Mxd3/Purg/Zbtb16/E2f1/Ifi213/Nfatc1/Hey1/Kdm4b/Snai1/E2f7/Esrra/Foxp4/Foxp4/Zeb1/Bcl6/Gcfc2/Batf3	48
MF	GO:0005096	GTPase activator activity	44/2367	239/20759	0.000901745	0.031131	0.0269478	Tbc1d30/Ect2/Tbc1d20/Ranbp2/Agfg1/Arap1/Racgap1/Git1/Rgs12/Chn2/Arhgap39/Sh3bp1/Ric8b/Gapvd1/Depdc1b/Nckap1l/Depdc1a/Nprl3/Dlc1/Arrb1/Stard13/Tbc1d10b/Smap2/Rin2/Arhgef1/Rabgap1/Rgs10/Wnt11/Tbck/Acap3/Ric8a/Dab2ip/Arhgap24/Tbc1d10a/Fam13b/Arhgap42/Sipa1l1/Tbc1d17/Arhgap19/Rab3gap1/Rgs2/Plcb1/Agfg2/Arhgap25	44
MF	GO:0004540	ribonuclease activity	25/2367	114/20759	0.000931294	0.031131	0.0269478	Cnot7/Slfn8/Slfn8/Slfn8/Cnot8/Pnpt1/Fen1/Snd1/Ang/Rnase1/Slfn9/Slfn9/Slfn9/Slfn9/Toe1/Pan3/Slfn14/Slfn14/Slfn14/Slfn14/Tsn/Rnase4/Ern1/Rnaseh2a/Elac1	25
MF	GO:0042287	MHC protein binding	10/2367	29/20759	0.000940773	0.031131	0.0269478	Klrk1/Pilrb1/Tap2/March1/Klrd1/Atp5b/Atp5a1/Atp5a1/Cd74/H2-T23	10
MF	GO:0008047	enzyme activator activity	73/2367	449/20759	0.00112828	0.0362378	0.0313683	Tbc1d30/Ect2/Tbc1d20/Ranbp2/Igfbp3/Agfg1/Casp3/Arap1/Racgap1/Git1/Rgs12/Prkcd/Chn2/Arhgap39/Ctsh/Fn1/Sh3bp1/Ccnb1/Ric8b/Gapvd1/Depdc1b/Nckap1l/Depdc1a/Nprl3/Itsn1/Dlc1/Arrb1/Cdkn1a/Stard13/Cks1b/Tbc1d10b/Smap2/Rin2/Arhgef1/Rabgap1/Casp8ap2/Rgs10/Srebf1/Wnt11/Dnajb2/Tbck/Psme1/Atp1b1/Acap3/Wnk1/Ric8a/Dab2ip/Psmd14/Arhgap24/Rictor/Tbc1d10a/Fam13b/Arhgap42/Sipa1l1/Tbc1d17/Arhgap19/Malt1/Rab3gap1/Lam…	73
MF	GO:0050662	coenzyme binding	51/2367	292/20759	0.0012754	0.0397925	0.0344454	Sqle/Cybb/Tsta3/Acoxl/Got1/Plpbp/Aldh2/Fmo3/Cth/Insr/Acbd5/Acad11/H2-Ke6/Por/Hsd11b1/Acox1/Gnmt/Ilvbl/Plod3/Sirt7/Phykpl/Idh3g/Dhfr/Srr/Nnt/Nnt/Acad10/P4ha3/Prmt8/Ogfod1/Sirt3/H6pd/Mettl3/Soat1/Ldhb/Prmt1/Hadha/Plod2/Hadhb/Pygm/Pygm/Sirt6/Kynu/Acads/Kyat3/Acox2/Acot11/Kmo/Txnrd3/Etfa/Adh1	51
MF	GO:0042623	ATPase activity, coupled	58/2367	345/20759	0.00158655	0.0481252	0.0416584	Dhx30/Dhx9/Nsf/Atp6v0a4/Kif11/Kif11/Dhx8/Abcg3/Rad51/Atp2a3/Rad54b/Ccnh/Kifc3/Atp6v1h/Msh3/Stard9/Top2a/Atp5g3/Atp2c1/Kif18a/Abcc3/Helz2/Spast/Dnah9/Blm/Ercc6l/Dhx34/Dna2/Tap2/Ddx11/Mcm7/Rfc5/Psmc2/Atp1b1/Kif1a/Ddx54/Ino80/Ddx5/Ipo8/Atp6v0a2/Atp2c2/Kif18b/Kifc1/Atp5b/Kif1b/Polq/Atrx/Dnah8/Brip1/Atp5a1/Atp5a1/Atp2b1/Myh9/Fign/Kif20b/Abca3/Atp1a1/Rad17	58
MF	GO:0032452	histone demethylase activity	9/2367	26/20759	0.0016347	0.048172	0.0416989	Kdm4a/Uty/Kdm5a/Kdm5d/Kdm5c/Jmjd1c/Jmjd1c/Kdm2a/Kdm4b	9
MF	GO:0035173	histone kinase activity	7/2367	17/20759	0.00171036	0.048172	0.0416989	Ccnb1/Prkcb/Aurka/Prkaa1/Haspin/Aurkb/Cdk1	7
MF	GO:1901681	sulfur compound binding	44/2367	247/20759	0.00177988	0.048172	0.0416989	Lpl/Adamts8/Fst/Aplp2/Eva1c/Adamts15/Fn1/Agrn/Mgst1/Hist1h1a/Ang/Lrpap1/Fbn1/Insr/Gns/Acbd5/Ndnf/Gstm1/Nav2/Ccl8/Col5a1/Ptprc/Gnmt/Ilvbl/Zfp207/Gstm5/Rpl22/Ager/Prmt8/Postn/Mettl3/Soat1/Vegfb/Prmt1/Hadha/Wisp1/Hadhb/Slit2/Pcolce/Anxa4/Acads/Acot11/Liph/Rcc1	44
MF	GO:0043022	ribosome binding	16/2367	64/20759	0.00180572	0.048172	0.0416989	Pttg1/Rpsa/Naa16/Stau2/Rpn2/Slfn14/Slfn14/Slfn14/Slfn14/Eif6/Eif5a/Eif3c/Rictor/Maip1/Abcf1/Eef2	16
MF	GO:0031748	D1 dopamine receptor binding	6/2367	13/20759	0.00183806	0.048172	0.0416989	Nsf/Dlg4/Gnas/Cav2/Ppp1r1b/Ptger1	6
MF	GO:0005089	Rho guanyl-nucleotide exchange factor activity	17/2367	70/20759	0.00185277	0.048172	0.0416989	Ect2/Mcf2l/Spata13/Akap13/Itsn1/Arhgef1/Trio/Dock10/Plekhg2/Fgd2/Arhgef28/Fgd1/Arhgef25/Tiam1/Arhgef6/Dock11/Eps8l2	17

## Sheet: F_vs_GmRNA_GSEA enrich
ID	Description	setSize	enrichmentScore	NES	pvalue	p.adjust	qvalues	rank	leading_edge	core_enrichment
HALLMARK_KRAS_SIGNALING_DN	HALLMARK_KRAS_SIGNALING_DN	13	0.536749	1.5088	0.0345841	0.781818	0.781818	537	tags=53%, list=24%, signal=41%	Dtnb/Nr4a2/Fgfr3/Ntf3/Selenop/Idua/Gpr19/Fggy
HALLMARK_INTERFERON_ALPHA_RESPONSE	HALLMARK_INTERFERON_ALPHA_RESPONSE	17	0.47873	1.44156	0.0431818	0.781818	0.781818	132	tags=21%, list=6%, signal=20%	Ncoa7/Cd47/H2-T23/Trafd1
HALLMARK_PROTEIN_SECRETION	HALLMARK_PROTEIN_SECRETION	14	0.481	1.38508	0.107206	0.80521	0.80521	635	tags=47%, list=28%, signal=34%	Gnas/Sgms1/Sh3gl2/Stx16/Cope/Ap3b1/Ap2b1/Ergic3
HALLMARK_DNA_REPAIR	HALLMARK_DNA_REPAIR	11	0.514203	1.37738	0.120782	0.80521	0.80521	569	tags=50%, list=25%, signal=38%	Aprt/Rnmt/Nudt9/Supt4a/Surf1/Taf1c/Aprt
HALLMARK_KRAS_SIGNALING_UP	HALLMARK_KRAS_SIGNALING_UP	27	0.364156	1.248	0.162455	0.869565	0.869565	446	tags=28%, list=20%, signal=23%	Peg3/Vwa5a/Il1rl2/Il33/Cmklr1/Tmem176b/Tmem176a/Epb41l3/Angptl4
HALLMARK_HEME_METABOLISM	HALLMARK_HEME_METABOLISM	25	0.373121	1.26246	0.173913	0.869565	0.869565	220	tags=19%, list=10%, signal=18%	Ucp2/Snca/Slc10a3/Smox/Agpat4/Sec14l1
HALLMARK_PI3K_AKT_MTOR_SIGNALING	HALLMARK_PI3K_AKT_MTOR_SIGNALING	12	-0.415378	-1.18292	0.263617	0.937652	0.937652	481	tags=43%, list=21%, signal=34%	Il2rg/Il2rg/Ube2d3/Akt1s1/Rptor
HALLMARK_ESTROGEN_RESPONSE_LATE	HALLMARK_ESTROGEN_RESPONSE_LATE	20	0.365278	1.15513	0.275862	0.937652	0.937652	401	tags=32%, list=18%, signal=26%	Cd44/Llgl2/Ncor2/Abca3/Clic3/Prss23/Fgfr3
HALLMARK_ALLOGRAFT_REJECTION	HALLMARK_ALLOGRAFT_REJECTION	19	0.368202	1.13803	0.300725	0.937652	0.937652	481	tags=38%, list=21%, signal=30%	St8sia4/Nck1/Il2rg/Ccnd3/Il2rg/Fcgr2b/H2-Q7/Tlr3/Ptprc/Ikbkb
HALLMARK_GLYCOLYSIS	HALLMARK_GLYCOLYSIS	24	0.327811	1.09583	0.339254	0.937652	0.937652	557	tags=29%, list=25%, signal=22%	Cd44/Arpp19/B3gat3/Pfkfb1/Angptl4/Stc1/Idua/Sdc1
HALLMARK_G2M_CHECKPOINT	HALLMARK_G2M_CHECKPOINT	31	-0.287373	-1.06994	0.362222	0.937652	0.937652	690	tags=50%, list=31%, signal=35%	Hmmr/Cenpf/Mki67/Ezh2/Prc1/Pds5b/Ilf3/Fancc/E2f4/Espl1/Nusap1/Dbf4/Hspa8/Knl1/Suv39h1/Casp8ap2
HALLMARK_ADIPOGENESIS	HALLMARK_ADIPOGENESIS	23	0.32478	1.07101	0.368897	0.937652	0.937652	30	tags=7%, list=1%, signal=7%	Ucp2/Mrpl15
HALLMARK_MYC_TARGETS_V1	HALLMARK_MYC_TARGETS_V1	14	0.367701	1.05883	0.390158	0.937652	0.937652	294	tags=25%, list=13%, signal=22%	Hnrnpu/Rps5/Cnbp/Tufm
HALLMARK_UV_RESPONSE_DN	HALLMARK_UV_RESPONSE_DN	24	0.310355	1.03747	0.410302	0.937652	0.937652	195	tags=11%, list=9%, signal=11%	Rbpms/Magi2/Rbpms/Rbpms
HALLMARK_EPITHELIAL_MESENCHYMAL_TRANSITION	HALLMARK_EPITHELIAL_MESENCHYMAL_TRANSITION	22	0.300933	0.980069	0.495495	0.937652	0.937652	732	tags=34%, list=32%, signal=24%	Cd44/Fgf2/Fbln2/Emp3/Serpinh1/Fn1/Sdc1/Bmp1/Col1a1/Eln/Nt5e
HALLMARK_MTORC1_SIGNALING	HALLMARK_MTORC1_SIGNALING	26	0.285133	0.976492	0.496528	0.937652	0.937652	705	tags=31%, list=31%, signal=22%	Atp2a2/Prdx1/Hspa4/Actr3/Serpinh1/Stc1/Fads1/Cdkn1a/Dhcr7/Psmd14
HALLMARK_PEROXISOME	HALLMARK_PEROXISOME	14	0.327221	0.94226	0.509666	0.937652	0.937652	766	tags=53%, list=34%, signal=35%	Prdx1/Cnbp/Pex11b/Pex11a/Fads1/Ercc3/Vps4b/Ech1
HALLMARK_E2F_TARGETS	HALLMARK_E2F_TARGETS	25	-0.27986	-0.97606	0.519906	0.937652	0.937652	687	tags=48%, list=30%, signal=34%	Dclre1b/Mki67/Rfc2/Ezh2/Pds5b/Diaph3/Ilf3/Smc6/Espl1/Tcf19/Dnmt1/Suv39h1
HALLMARK_UV_RESPONSE_UP	HALLMARK_UV_RESPONSE_UP	19	0.310098	0.958443	0.525362	0.937652	0.937652	363	tags=30%, list=16%, signal=26%	Tgfbrap1/H2-Q7/Atp6v1c1/Kcnh2/Hyal2/Klhdc3
HALLMARK_APICAL_JUNCTION	HALLMARK_APICAL_JUNCTION	29	-0.252254	-0.935652	0.538631	0.937652	0.937652	364	tags=23%, list=16%, signal=19%	Sirpa/Kcnh2/Actg1/Ptprc/Actn4/Zyx/Actg1
HALLMARK_APOPTOSIS	HALLMARK_APOPTOSIS	18	-0.29286	-0.948741	0.53915	0.937652	0.937652	368	tags=26%, list=16%, signal=22%	Cd44/Rara/Clu/Gpx1
HALLMARK_SPERMATOGENESIS	HALLMARK_SPERMATOGENESIS	16	0.293096	0.872681	0.626571	0.982222	0.982222	713	tags=35%, list=32%, signal=24%	Rad17/Parp2/Phf7/Ip6k1/Spata6/Ncaph/Arl4a
HALLMARK_MITOTIC_SPINDLE	HALLMARK_MITOTIC_SPINDLE	37	-0.229196	-0.892141	0.655012	0.982222	0.982222	660	tags=52%, list=29%, signal=38%	Kntc1/Myo1e/Rasa1/Prc1/Myo1e/Arhgef11/Nck1/Dst/Kptn/Anln/Espl1/Nusap1/Tubd1/Epb41/Myo1e/Sptbn1/Arhgap4/Anln/Actn4/Rapgef6/Lrpprc/Tubd1/Bcar1
HALLMARK_OXIDATIVE_PHOSPHORYLATION	HALLMARK_OXIDATIVE_PHOSPHORYLATION	18	-0.261751	-0.847962	0.662192	0.982222	0.982222	240	tags=20%, list=11%, signal=18%	Dlst/Cyb5r3/Lrpprc
HALLMARK_INFLAMMATORY_RESPONSE	HALLMARK_INFLAMMATORY_RESPONSE	24	0.252963	0.845619	0.689165	0.982222	0.982222	168	tags=48%, list=7%, signal=45%	Calcrl/Slamf1/Ldlr/Rasgrp1/Atp2a2/Ldlr/P2rx7/Psen1/Tlr3/Mxd1/Slc11a2/Sgms2
HALLMARK_P53_PATHWAY	HALLMARK_P53_PATHWAY	29	0.231344	0.809171	0.723133	0.982222	0.982222	307	tags=15%, list=14%, signal=13%	Vwa5a/Prkab1/Trafd1/Mapkapk3/Irak1
HALLMARK_TNFA_SIGNALING_VIA_NFKB	HALLMARK_TNFA_SIGNALING_VIA_NFKB	20	0.255905	0.809258	0.738657	0.982222	0.982222	414	tags=16%, list=18%, signal=13%	Cd44/Nr4a2/Tnfaip8/Il15ra
HALLMARK_CHOLESTEROL_HOMEOSTASIS	HALLMARK_CHOLESTEROL_HOMEOSTASIS	15	-0.251406	-0.772403	0.753394	0.982222	0.982222	176	tags=39%, list=8%, signal=36%	Ldlr/Fasn/Actg1/Clu/Pparg/Actg1
HALLMARK_UNFOLDED_PROTEIN_RESPONSE	HALLMARK_UNFOLDED_PROTEIN_RESPONSE	12	0.268678	0.734303	0.808471	0.982222	0.982222	724	tags=54%, list=32%, signal=37%	Banf1/Tatdn2/Spcs1/Eif2ak3/Eef2/Rps14/Hyou1
HALLMARK_REACTIVE_OXYGEN_SPECIES_PATHWAY	HALLMARK_REACTIVE_OXYGEN_SPECIES_PATHWAY	10	-0.243224	-0.645288	0.893665	0.982222	0.982222	70	tags=27%, list=3%, signal=27%	Hmox2/Sbno2
HALLMARK_COMPLEMENT	HALLMARK_COMPLEMENT	18	0.220454	0.673545	0.908108	0.982222	0.982222	970	tags=65%, list=43%, signal=38%	Gata3/Kynu/Fn1/Serpine1/Gmfb/Dock10/Fn1/Hspa1a/Rasgrp1/Fn1/Fn1/Fn1/Zeb1/Psen1/Zeb1/Clu
HALLMARK_IL2_STAT5_SIGNALING	HALLMARK_IL2_STAT5_SIGNALING	27	0.19735	0.67634	0.918773	0.982222	0.982222	664	tags=50%, list=29%, signal=36%	Myo1e/Syngr2/Ccnd3/Myo1e/Cyfip1/Batf3/Etv4/Ccnd3/Cd44/Eno3/Myo1e/Mxd1/P4ha1/Adam19/Eno3
HALLMARK_FATTY_ACID_METABOLISM	HALLMARK_FATTY_ACID_METABOLISM	24	-0.186548	-0.642508	0.929385	0.982222	0.982222	556	tags=43%, list=25%, signal=33%	Ugdh/Hmgcl/Acadl/Blvra/Fasn/Ppara/Vnn1/Eno3/Dlst/Eno3/Hsdl2
HALLMARK_XENOBIOTIC_METABOLISM	HALLMARK_XENOBIOTIC_METABOLISM	37	0.160003	0.595053	0.968586	0.982222	0.982222	318	tags=27%, list=14%, signal=24%	Papss2/Ugdh/Shmt2/Cyp2e1/Csad/Hes6/Csad/Tmem176b/Vnn1/Abhd6/Bcar1
HALLMARK_ANDROGEN_RESPONSE	HALLMARK_ANDROGEN_RESPONSE	17	0.190264	0.572926	0.969091	0.982222	0.982222	580	tags=35%, list=26%, signal=26%	Myl12a/Herc3/Adamts1/Ccnd3/Myl12a/Tnfaip8/Selenop
HALLMARK_COAGULATION	HALLMARK_COAGULATION	15	-0.169567	-0.520967	0.972851	0.982222	0.982222	1877	tags=29%, list=83%, signal=5%	Fn1/Ctse/Fn1/Sirt2/Clu
HALLMARK_INTERFERON_GAMMA_RESPONSE	HALLMARK_INTERFERON_GAMMA_RESPONSE	33	0.156838	0.565683	0.980216	0.982222	0.982222	94	tags=10%, list=4%, signal=10%	Ptpn1/Rapgef6/Ciita
HALLMARK_HYPOXIA	HALLMARK_HYPOXIA	19	-0.151895	-0.497624	0.982222	0.982222	0.982222	390	tags=32%, list=17%, signal=27%	S100a4/Hdlbp/Cited2/Eno3/P4ha1/Eno3

## Sheet: F_vs_HmRNA_GSEA enrich
ID	Description	setSize	enrichmentScore	NES	pvalue	p.adjust	qvalues	rank	leading_edge	core_enrichment
HALLMARK_E2F_TARGETS	HALLMARK_E2F_TARGETS	74	-0.399451	-1.83215	0.00268097	0.10992	0.101594	925	tags=71%, list=31%, signal=51%	Ncapd2/Luc7l3/Tk1/Bub1b/Ube2t/Rad51ap1/Ezh2/Bard1/Mcm3/Cdk4/Ncapd2/Plk1/Ccne1/Dlgap5/Brca1/Wdr90/Rrm2/Ccnb2/Melk/Ncapd2/Cbx5/Kif4/Spc25/Birc5/Mcm7/E2f8/Cenpe/Kif2c/Dlgap5/Aurka/Top2a/Cks2/Cdca8/Cdc20/Aurkb/Top2a/Top2a/Cdk1/Kif22/Depdc1a/Kif18b/Smc3/Mxd3/Timeless/Mki67/Atad2/Racgap1/Hells/Cenpm/Smc6/Hmmr/Aurka/Tk1/Spc24/Spag5/Brca1/Srsf2/Brca2/Cenpm/E2f8/Diaph3/Chek2/Cdkn2c/Top2a/Dnmt1/Aurkb/Tacc3…
HALLMARK_G2M_CHECKPOINT	HALLMARK_G2M_CHECKPOINT	80	-0.360284	-1.67914	0.00791557	0.162269	0.149979	890	tags=61%, list=30%, signal=45%	Slc38a1/Prc1/Ezh2/Bard1/Kif20b/Mcm3/Ube2c/Cdk4/Kif23/Plk1/Cdc6/Ccnb2/Kif4/Birc5/Kif23/Cenpe/Kif2c/Kif15/Kif23/Ndc80/Ccnf/Kif11/Kif15/Ccna2/Prc1/Aurka/Top2a/Cks2/Cdc20/Cenpa/Aurkb/Top2a/Top2a/Cdk1/Kif22/Bub1/Meis2/Prc1/Prc1/Mki67/Racgap1/Ttk/Hmmr/Cenpf/Aurka/Prc1/Srsf2/Brca2/Kif15/Troap/Troap/Tpx2/Cdkn2c/Tpx2/Top2a/Atrx/Tpx2/Prc1/Aurkb/Nusap1/Prc1/Tpx2/E2f1/Tacc3/Ccna2/Casp8ap2/Knl1/Pml/Lig3/Stil
HALLMARK_P53_PATHWAY	HALLMARK_P53_PATHWAY	35	0.429705	1.5598	0.0246046	0.261384	0.241588	932	tags=52%, list=31%, signal=37%	Mknk2/Vwa5a/Tm4sf1/Osgin1/Baiap2/Tsc22d1/Baiap2/Slc3a2/Klk8/Cdkn1a/Cd81/Ccnd3/Pmm1/Ddit4/Txnip/Eps8l2/Zbtb16/Sdc1/Dnttip2/Osgin1/Ninj1/Rchy1/Atf3
HALLMARK_PROTEIN_SECRETION	HALLMARK_PROTEIN_SECRETION	18	0.511308	1.5763	0.0255009	0.261384	0.241588	740	tags=50%, list=25%, signal=38%	Egfr/Ap2m1/Sgms1/Ap2b1/Cope/Stx16/Ap3b1/Atp1a1/Cav2
HALLMARK_ESTROGEN_RESPONSE_EARLY	HALLMARK_ESTROGEN_RESPONSE_EARLY	32	0.417763	1.48439	0.0418848	0.343455	0.317443	163	tags=22%, list=5%, signal=21%	Clic3/Kdm4b/Tsku/Tsku/Fkbp5/Sh3bp5/Ablim1/Celsr1
HALLMARK_HYPOXIA	HALLMARK_HYPOXIA	29	0.398481	1.39254	0.0782609	0.534783	0.494279	1009	tags=58%, list=34%, signal=39%	Egfr/Angptl4/Angptl4/Ilvbl/Plin2/Maff/Cdkn1a/Angptl4/Angptl4/Ndst1/Ankzf1/Ddit4/Ndst2/Errfi1/Col5a1/Adm/Atf3/Lox/Mt2/Igfbp3/Gck
HALLMARK_KRAS_SIGNALING_UP	HALLMARK_KRAS_SIGNALING_UP	31	0.384679	1.3568	0.0920139	0.538938	0.49812	424	tags=24%, list=14%, signal=21%	Peg3/Vwa5a/Epb41l3/Angptl4/Il33/Angptl4/Map4k1/Satb1/Tmem176a
HALLMARK_INFLAMMATORY_RESPONSE	HALLMARK_INFLAMMATORY_RESPONSE	29	-0.361842	-1.33906	0.112412	0.542885	0.501768	1077	tags=58%, list=36%, signal=37%	Slamf1/C5ar1/Nfkb1/Ldlr/Cybb/Itgb8/Nmi/Lck/Icam1/Csf1/Tnfsf15/Cd82/Ffar2/Atp2c1/Sema4d/Psen1/Slc28a2/Rnf144b
HALLMARK_ADIPOGENESIS	HALLMARK_ADIPOGENESIS	40	0.349828	1.30937	0.121368	0.542885	0.501768	825	tags=44%, list=27%, signal=33%	Mrpl15/Slc27a1/Angptl4/Dram2/Angptl4/Por/Arl4a/Slc19a1/Plin2/Ywhag/Angptl4/Acads/Lpl/Chuk/Angptl4/Vegfb/Ucp2/Cd151/Cd151/Lama4/Ucp2/Lpl/Cd151/Ech1
HALLMARK_UNFOLDED_PROTEIN_RESPONSE	HALLMARK_UNFOLDED_PROTEIN_RESPONSE	13	-0.440524	-1.31747	0.143791	0.542885	0.501768	314	tags=23%, list=10%, signal=21%	Eif4ebp1/Dctn1
HALLMARK_INTERFERON_ALPHA_RESPONSE	HALLMARK_INTERFERON_ALPHA_RESPONSE	17	-0.402829	-1.28453	0.145652	0.542885	0.501768	694	tags=37%, list=23%, signal=29%	Ncoa7/Helz2/Csf1/H2-T23/Gbp3/H2-Q7
HALLMARK_PI3K_AKT_MTOR_SIGNALING	HALLMARK_PI3K_AKT_MTOR_SIGNALING	28	0.360509	1.24934	0.16696	0.570445	0.527241	108	tags=12%, list=4%, signal=11%	Mknk2/Egfr/Ap2m1/Prkcb
HALLMARK_KRAS_SIGNALING_DN	HALLMARK_KRAS_SIGNALING_DN	15	0.421735	1.23429	0.212569	0.610491	0.564253	472	tags=26%, list=16%, signal=22%	Dtnb/Nr4a2/Cdh16/Pdk2/Klk8
HALLMARK_IL6_JAK_STAT3_SIGNALING	HALLMARK_IL6_JAK_STAT3_SIGNALING	11	-0.423877	-1.21535	0.220557	0.610491	0.564253	974	tags=62%, list=32%, signal=42%	Stat1/Stat1/Fas/A2m/Csf1/Il2rg/Ptpn1
HALLMARK_IL2_STAT5_SIGNALING	HALLMARK_IL2_STAT5_SIGNALING	44	0.307166	1.18007	0.22335	0.610491	0.564253	545	tags=24%, list=18%, signal=20%	Ager/Prkch/Nfkbiz/Capg/Arl4a/Plin2/Tnfrsf4/Maff/Map6/Ncs1/Cd81/Prnp
HALLMARK_APICAL_JUNCTION	HALLMARK_APICAL_JUNCTION	39	0.305812	1.14084	0.275214	0.615973	0.56932	515	tags=31%, list=17%, signal=26%	Egfr/Ctnnd1/Ctnnd1/Ctnnd1/Baiap2/Amigo2/Pbx2/Mapk14/Ctnnd1/Pkd1/Cap1/Baiap2/Cdk8/Cap1/Arhgef6/Col17a1
HALLMARK_FATTY_ACID_METABOLISM	HALLMARK_FATTY_ACID_METABOLISM	20	0.355706	1.13567	0.292857	0.615973	0.56932	1404	tags=83%, list=47%, signal=44%	Acaa1a/Hsd17b7/Hadhb/Acads/Suclg2/Ech1/Etfdh/Ncaph2/Acox1/Ech1/Glul/Dlst/Glul/Acot2/Psme1/Cyp1a1/Inmt/Adh1/Etfdh
HALLMARK_SPERMATOGENESIS	HALLMARK_SPERMATOGENESIS	26	0.330407	1.1302	0.292982	0.615973	0.56932	490	tags=24%, list=16%, signal=20%	Phf7/Chfr/Clpb/Nphp1/Arl4a/Art3/Slc12a2
HALLMARK_INTERFERON_GAMMA_RESPONSE	HALLMARK_INTERFERON_GAMMA_RESPONSE	44	-0.267159	-1.10379	0.301703	0.615973	0.56932	1003	tags=63%, list=33%, signal=43%	Slamf7/Gbp4/Tnfsf10/Bank1/Cd74/Pnpt1/Klrk1/Pfkp/Tnfsf10/Ogfr/Ptpn6/Nfkb1/Ciita/Stat1/Stat1/Bank1/Bank1/Bank1/Fas/Nmi/Ciita/Upp1/St8sia4/Slamf7/Helz2/Icam1/H2-T23/Ptpn1/Lysmd2/St3gal5/Cfb/Gbp3/H2-Q7/Pml/Ciita
HALLMARK_HEME_METABOLISM	HALLMARK_HEME_METABOLISM	32	0.312778	1.11136	0.310646	0.615973	0.56932	734	tags=41%, list=24%, signal=31%	Klf3/Gapvd1/Epb41/Epb41/Add1/Htra2/Sidt2/Gde1/Smox/Fbxo7/Mkrn1/Ccnd3/Glrx5/Ucp2/Vezf1/Ucp2
HALLMARK_ANDROGEN_RESPONSE	HALLMARK_ANDROGEN_RESPONSE	17	0.36907	1.11271	0.315498	0.615973	0.56932	635	tags=26%, list=21%, signal=21%	Azgp1/Fkbp5/Tsc22d1/Cenpn/Ccnd3
HALLMARK_COMPLEMENT	HALLMARK_COMPLEMENT	28	0.30781	1.06671	0.363796	0.677984	0.626634	466	tags=24%, list=16%, signal=20%	Dock10/Usp14/Prkcd/Prss36/Fn1/Fn1/Lck/Maff
HALLMARK_PEROXISOME	HALLMARK_PEROXISOME	13	0.364769	1.03436	0.414365	0.73865	0.682706	711	tags=26%, list=24%, signal=20%	Prdx1/Acaa1a/Mvp/Pex11a/Dlg4
HALLMARK_ESTROGEN_RESPONSE_LATE	HALLMARK_ESTROGEN_RESPONSE_LATE	29	-0.263029	-0.973386	0.508197	0.85891	0.793858	619	tags=31%, list=21%, signal=25%	Cdc20/Top2a/Top2a/Slc29a1/Top2a/Nxt1/Lsr/Tiam1/Nab2/Stil
HALLMARK_APOPTOSIS	HALLMARK_APOPTOSIS	28	0.274603	0.951634	0.523726	0.85891	0.793858	483	tags=16%, list=16%, signal=13%	Pdgfrb/Add1/Satb1/Bik/Pak1/Cdkn1a
HALLMARK_MITOTIC_SPINDLE	HALLMARK_MITOTIC_SPINDLE	69	-0.208252	-0.939882	0.587927	0.921494	0.851702	708	tags=50%, list=24%, signal=39%	Kif4/Birc5/Kif23/Cenpe/Kif2c/Kif15/Kif23/Ndc80/Kif11/Kif15/Prc1/Mid1/Dlgap5/Aurka/Top2a/Top2a/Top2a/Cdk1/Kif22/Bub1/Smc3/Ect2/Prc1/Prc1/Racgap1/Ttk/Nck1/Kntc1/Itsn1/Cenpf/Aurka/Prc1/Brca2/Kif15/Itsn1/Tpx2/Tpx2/Top2a/Tpx2/Prc1/Nusap1/Prc1/Tpx2/Tubd1/Cyth2/Tiam1/Synpo/Rab3gap1/Anln/Lrpprc
HALLMARK_OXIDATIVE_PHOSPHORYLATION	HALLMARK_OXIDATIVE_PHOSPHORYLATION	40	0.244299	0.914387	0.606838	0.921494	0.851702	1046	tags=51%, list=35%, signal=34%	Mrpl15/Ndufs1/Por/Acaa1a/Htra2/Ndufa7/Mrps11/Hadhb/Atp5a1/Ndufb4/Atp5g3/Hadha/Slc25a5/Ech1/Etfa/Etfdh/Atp6v1h/Pdk4/Atp5j2/Ndufa4/Atp1b1/Ech1/Dlst
HALLMARK_CHOLESTEROL_HOMEOSTASIS	HALLMARK_CHOLESTEROL_HOMEOSTASIS	16	0.290238	0.864611	0.639042	0.935741	0.864869	235	tags=14%, list=8%, signal=13%	Fdps/Pparg
