# Supplementary material for: Integrative Studies of Human Cord Blood Derived Mononuclear Cells and Umbilical Cord Derived Mesenchyme Stem Cells in Ameliorating Bronchopulmonary Dysplasia
Source: Front Cell Dev Biol. 2021 Nov 9;9:679866. doi: 10.3389/fcell.2021.679866 (PMC8631197; doi:10.3389/fcell.2021.679866)
Supplement: Supplementary file 6 [file Table_6.XLSX]

## Sheet: CB-MNC lncRNA-miRNA-mRNA
miRNA	symbol	lncRNA	reg_mRNA	reg_lncRNA	reg_miRNA
mmu-miR-129-5p	Fpgt	NONMMUG008449.2	up	up	down
mmu-miR-384-3p	Fpgt	NONMMUG008449.2	up	up	down
mmu-miR-449a-3p	Fpgt	NONMMUG008449.2	up	up	down
mmu-miR-5103	Fpgt	NONMMUG008449.2	up	up	down
mmu-miR-129-5p	Fpgt	NONMMUG066594.1	up	up	down
mmu-miR-384-3p	Fpgt	NONMMUG066594.1	up	up	down
mmu-miR-5103	Fpgt	NONMMUG066594.1	up	up	down
mmu-miR-103-2-5p	Wdr61	NONMMUG016965.2	down	down	up
mmu-miR-1193-3p	Wdr61	NONMMUG016965.2	down	down	up
mmu-miR-134-3p	Wdr61	NONMMUG016965.2	down	down	up
mmu-miR-1969	Wdr61	NONMMUG016965.2	down	down	up
mmu-miR-196a-5p	Wdr61	NONMMUG016965.2	down	down	up
mmu-miR-3072-3p	Wdr61	NONMMUG016965.2	down	down	up
mmu-miR-376a-3p	Wdr61	NONMMUG016965.2	down	down	up
mmu-miR-376a-5p	Wdr61	NONMMUG016965.2	down	down	up
mmu-miR-377-5p	Wdr61	NONMMUG016965.2	down	down	up
mmu-miR-412-5p	Wdr61	NONMMUG016965.2	down	down	up
mmu-miR-483-3p	Wdr61	NONMMUG016965.2	down	down	up
mmu-miR-677-5p	Wdr61	NONMMUG016965.2	down	down	up
mmu-miR-7240-5p	Wdr61	NONMMUG016965.2	down	down	up
mmu-miR-7b-5p	Wdr61	NONMMUG016965.2	down	down	up
mmu-miR-879-3p	Wdr61	NONMMUG016965.2	down	down	up
mmu-miR-1193-3p	Hspb2	NONMMUG051012.2	down	down	up
mmu-miR-134-3p	Hspb2	NONMMUG051012.2	down	down	up
mmu-miR-1969	Hspb2	NONMMUG051012.2	down	down	up
mmu-miR-3072-3p	Hspb2	NONMMUG051012.2	down	down	up
mmu-miR-376a-3p	Hspb2	NONMMUG051012.2	down	down	up
mmu-miR-376a-5p	Hspb2	NONMMUG051012.2	down	down	up
mmu-miR-412-5p	Hspb2	NONMMUG051012.2	down	down	up
mmu-miR-483-3p	Hspb2	NONMMUG051012.2	down	down	up
mmu-miR-677-5p	Hspb2	NONMMUG051012.2	down	down	up
mmu-miR-6947-5p	Hspb2	NONMMUG051012.2	down	down	up
mmu-miR-701-3p	Hspb2	NONMMUG051012.2	down	down	up
mmu-miR-7b-5p	Hspb2	NONMMUG051012.2	down	down	up
mmu-miR-879-3p	Hspb2	NONMMUG051012.2	down	down	up
mmu-miR-103-2-5p	Aldh1a2	NONMMUG057069.1	down	down	up
mmu-miR-1193-3p	Aldh1a2	NONMMUG057069.1	down	down	up
mmu-miR-134-3p	Aldh1a2	NONMMUG057069.1	down	down	up
mmu-miR-1969	Aldh1a2	NONMMUG057069.1	down	down	up
mmu-miR-196a-5p	Aldh1a2	NONMMUG057069.1	down	down	up
mmu-miR-3072-3p	Aldh1a2	NONMMUG057069.1	down	down	up
mmu-miR-376a-3p	Aldh1a2	NONMMUG057069.1	down	down	up
mmu-miR-376a-5p	Aldh1a2	NONMMUG057069.1	down	down	up
mmu-miR-377-5p	Aldh1a2	NONMMUG057069.1	down	down	up
mmu-miR-412-5p	Aldh1a2	NONMMUG057069.1	down	down	up
mmu-miR-483-3p	Aldh1a2	NONMMUG057069.1	down	down	up
mmu-miR-677-5p	Aldh1a2	NONMMUG057069.1	down	down	up
mmu-miR-6947-5p	Aldh1a2	NONMMUG057069.1	down	down	up
mmu-miR-7240-5p	Aldh1a2	NONMMUG057069.1	down	down	up
mmu-miR-7b-5p	Aldh1a2	NONMMUG057069.1	down	down	up
mmu-miR-879-3p	Aldh1a2	NONMMUG057069.1	down	down	up
mmu-miR-1199-5p	Eln	NONMMUG023774.2	up	up	down
mmu-miR-129-5p	Eln	NONMMUG023774.2	up	up	down
mmu-miR-204-3p	Eln	NONMMUG023774.2	up	up	down
mmu-miR-384-3p	Eln	NONMMUG023774.2	up	up	down
mmu-miR-5103	Eln	NONMMUG023774.2	up	up	down
mmu-miR-1199-5p	Eln	NONMMUG036652.2	up	up	down
mmu-miR-129-5p	Eln	NONMMUG036652.2	up	up	down
mmu-miR-204-3p	Eln	NONMMUG036652.2	up	up	down
mmu-miR-384-3p	Eln	NONMMUG036652.2	up	up	down
mmu-miR-5103	Eln	NONMMUG036652.2	up	up	down
mmu-miR-1199-5p	Eln	NONMMUG025014.2	up	up	down
mmu-miR-129-5p	Eln	NONMMUG025014.2	up	up	down
mmu-miR-204-3p	Eln	NONMMUG025014.2	up	up	down
mmu-miR-384-3p	Eln	NONMMUG025014.2	up	up	down
mmu-miR-5103	Eln	NONMMUG025014.2	up	up	down
mmu-miR-129-5p	Eln	NONMMUG017114.2	up	up	down
mmu-miR-204-3p	Eln	NONMMUG017114.2	up	up	down
mmu-miR-384-3p	Eln	NONMMUG017114.2	up	up	down
mmu-miR-5103	Eln	NONMMUG017114.2	up	up	down
mmu-miR-129-5p	Lig3	NONMMUG024536.2	up	up	down
mmu-miR-204-3p	Lig3	NONMMUG024536.2	up	up	down
mmu-miR-129-5p	Lig3	NONMMUG008449.2	up	up	down
mmu-miR-384-3p	Lig3	NONMMUG008449.2	up	up	down
mmu-miR-449a-3p	Lig3	NONMMUG008449.2	up	up	down
mmu-miR-5103	Lig3	NONMMUG008449.2	up	up	down
mmu-miR-1199-5p	Lig3	NONMMUG025014.2	up	up	down
mmu-miR-129-5p	Lig3	NONMMUG025014.2	up	up	down
mmu-miR-204-3p	Lig3	NONMMUG025014.2	up	up	down
mmu-miR-384-3p	Lig3	NONMMUG025014.2	up	up	down
mmu-miR-449a-3p	Lig3	NONMMUG025014.2	up	up	down
mmu-miR-5103	Lig3	NONMMUG025014.2	up	up	down
mmu-miR-653-5p	Lig3	NONMMUG025014.2	up	up	down
mmu-miR-129-5p	Lig3	NONMMUG002670.2	up	up	down
mmu-miR-204-3p	Lig3	NONMMUG002670.2	up	up	down
mmu-miR-129-5p	Lig3	NONMMUG045603.2	up	up	down
mmu-miR-204-3p	Lig3	NONMMUG045603.2	up	up	down
mmu-miR-384-3p	Lig3	NONMMUG045603.2	up	up	down
mmu-miR-449a-3p	Lig3	NONMMUG045603.2	up	up	down
mmu-miR-5103	Lig3	NONMMUG045603.2	up	up	down
mmu-miR-653-5p	Lig3	NONMMUG045603.2	up	up	down
mmu-miR-129-5p	Lig3	NONMMUG066594.1	up	up	down
mmu-miR-384-3p	Lig3	NONMMUG066594.1	up	up	down
mmu-miR-5103	Lig3	NONMMUG066594.1	up	up	down
mmu-miR-146a-3p	Churc1	NONMMUG077213.1	up	up	down
mmu-miR-103-2-5p	Bub1b	NONMMUG061335.1	down	down	up
mmu-miR-1193-3p	Bub1b	NONMMUG061335.1	down	down	up
mmu-miR-134-3p	Bub1b	NONMMUG061335.1	down	down	up
mmu-miR-1969	Bub1b	NONMMUG061335.1	down	down	up
mmu-miR-196a-5p	Bub1b	NONMMUG061335.1	down	down	up
mmu-miR-3072-3p	Bub1b	NONMMUG061335.1	down	down	up
mmu-miR-376a-3p	Bub1b	NONMMUG061335.1	down	down	up
mmu-miR-376a-5p	Bub1b	NONMMUG061335.1	down	down	up
mmu-miR-377-5p	Bub1b	NONMMUG061335.1	down	down	up
mmu-miR-412-5p	Bub1b	NONMMUG061335.1	down	down	up
mmu-miR-483-3p	Bub1b	NONMMUG061335.1	down	down	up
mmu-miR-677-5p	Bub1b	NONMMUG061335.1	down	down	up
mmu-miR-6947-5p	Bub1b	NONMMUG061335.1	down	down	up
mmu-miR-701-3p	Bub1b	NONMMUG061335.1	down	down	up
mmu-miR-7240-5p	Bub1b	NONMMUG061335.1	down	down	up
mmu-miR-7b-5p	Bub1b	NONMMUG061335.1	down	down	up
mmu-miR-879-3p	Bub1b	NONMMUG061335.1	down	down	up
mmu-miR-103-2-5p	Scrg1	NONMMUG044362.2	down	down	up
mmu-miR-1193-3p	Scrg1	NONMMUG044362.2	down	down	up
mmu-miR-134-3p	Scrg1	NONMMUG044362.2	down	down	up
mmu-miR-1969	Scrg1	NONMMUG044362.2	down	down	up
mmu-miR-196a-5p	Scrg1	NONMMUG044362.2	down	down	up
mmu-miR-3072-3p	Scrg1	NONMMUG044362.2	down	down	up
mmu-miR-376a-3p	Scrg1	NONMMUG044362.2	down	down	up
mmu-miR-376a-5p	Scrg1	NONMMUG044362.2	down	down	up
mmu-miR-377-5p	Scrg1	NONMMUG044362.2	down	down	up
mmu-miR-412-5p	Scrg1	NONMMUG044362.2	down	down	up
mmu-miR-483-3p	Scrg1	NONMMUG044362.2	down	down	up
mmu-miR-677-5p	Scrg1	NONMMUG044362.2	down	down	up
mmu-miR-701-3p	Scrg1	NONMMUG044362.2	down	down	up
mmu-miR-7240-5p	Scrg1	NONMMUG044362.2	down	down	up
mmu-miR-7b-5p	Scrg1	NONMMUG044362.2	down	down	up
mmu-miR-879-3p	Scrg1	NONMMUG044362.2	down	down	up
mmu-miR-103-2-5p	Atad2	NONMMUG014666.2	down	down	up
mmu-miR-1193-3p	Atad2	NONMMUG014666.2	down	down	up
mmu-miR-134-3p	Atad2	NONMMUG014666.2	down	down	up
mmu-miR-3072-3p	Atad2	NONMMUG014666.2	down	down	up
mmu-miR-376a-3p	Atad2	NONMMUG014666.2	down	down	up
mmu-miR-376a-5p	Atad2	NONMMUG014666.2	down	down	up
mmu-miR-377-5p	Atad2	NONMMUG014666.2	down	down	up
mmu-miR-412-5p	Atad2	NONMMUG014666.2	down	down	up
mmu-miR-483-3p	Atad2	NONMMUG014666.2	down	down	up
mmu-miR-677-5p	Atad2	NONMMUG014666.2	down	down	up
mmu-miR-7240-5p	Atad2	NONMMUG014666.2	down	down	up
mmu-miR-7b-5p	Atad2	NONMMUG014666.2	down	down	up
mmu-miR-879-3p	Atad2	NONMMUG014666.2	down	down	up
mmu-miR-1199-5p	Dlg4	NONMMUG087654.1	up	up	down
mmu-miR-129-5p	Dlg4	NONMMUG087654.1	up	up	down
mmu-miR-1298-5p	Dlg4	NONMMUG087654.1	up	up	down
mmu-miR-146a-3p	Dlg4	NONMMUG087654.1	up	up	down
mmu-miR-204-3p	Dlg4	NONMMUG087654.1	up	up	down
mmu-miR-384-3p	Dlg4	NONMMUG087654.1	up	up	down
mmu-miR-449a-3p	Dlg4	NONMMUG087654.1	up	up	down
mmu-miR-5103	Dlg4	NONMMUG087654.1	up	up	down
mmu-miR-653-3p	Dlg4	NONMMUG087654.1	up	up	down
mmu-miR-653-5p	Dlg4	NONMMUG087654.1	up	up	down
mmu-miR-871-3p	Dlg4	NONMMUG087654.1	up	up	down
mmu-miR-881-3p	Dlg4	NONMMUG087654.1	up	up	down
mmu-miR-1969	Prc1	NONMMUG051962.1	down	down	up
mmu-miR-103-2-5p	Rubcnl	NONMMUG022225.2	down	down	up
mmu-miR-1193-3p	Rubcnl	NONMMUG022225.2	down	down	up
mmu-miR-134-3p	Rubcnl	NONMMUG022225.2	down	down	up
mmu-miR-1969	Rubcnl	NONMMUG022225.2	down	down	up
mmu-miR-196a-5p	Rubcnl	NONMMUG022225.2	down	down	up
mmu-miR-3072-3p	Rubcnl	NONMMUG022225.2	down	down	up
mmu-miR-376a-3p	Rubcnl	NONMMUG022225.2	down	down	up
mmu-miR-376a-5p	Rubcnl	NONMMUG022225.2	down	down	up
mmu-miR-377-5p	Rubcnl	NONMMUG022225.2	down	down	up
mmu-miR-412-5p	Rubcnl	NONMMUG022225.2	down	down	up
mmu-miR-483-3p	Rubcnl	NONMMUG022225.2	down	down	up
mmu-miR-677-5p	Rubcnl	NONMMUG022225.2	down	down	up
mmu-miR-6947-5p	Rubcnl	NONMMUG022225.2	down	down	up
mmu-miR-701-3p	Rubcnl	NONMMUG022225.2	down	down	up
mmu-miR-7240-5p	Rubcnl	NONMMUG022225.2	down	down	up
mmu-miR-7b-5p	Rubcnl	NONMMUG022225.2	down	down	up
mmu-miR-879-3p	Rubcnl	NONMMUG022225.2	down	down	up
mmu-miR-134-3p	Fcmr	NONMMUG016329.2	down	down	up
mmu-miR-1969	Fcmr	NONMMUG016329.2	down	down	up
mmu-miR-196a-5p	Fcmr	NONMMUG016329.2	down	down	up
mmu-miR-412-5p	Fcmr	NONMMUG016329.2	down	down	up
mmu-miR-483-3p	Fcmr	NONMMUG016329.2	down	down	up
mmu-miR-677-5p	Fcmr	NONMMUG016329.2	down	down	up
mmu-miR-7240-5p	Fcmr	NONMMUG016329.2	down	down	up
mmu-miR-1193-3p	Kif11	NONMMUG002566.2	down	down	up
mmu-miR-134-3p	Kif11	NONMMUG002566.2	down	down	up
mmu-miR-1969	Kif11	NONMMUG002566.2	down	down	up
mmu-miR-196a-5p	Kif11	NONMMUG002566.2	down	down	up
mmu-miR-3072-3p	Kif11	NONMMUG002566.2	down	down	up
mmu-miR-376a-3p	Kif11	NONMMUG002566.2	down	down	up
mmu-miR-376a-5p	Kif11	NONMMUG002566.2	down	down	up
mmu-miR-377-5p	Kif11	NONMMUG002566.2	down	down	up
mmu-miR-412-5p	Kif11	NONMMUG002566.2	down	down	up
mmu-miR-483-3p	Kif11	NONMMUG002566.2	down	down	up
mmu-miR-677-5p	Kif11	NONMMUG002566.2	down	down	up
mmu-miR-6947-5p	Kif11	NONMMUG002566.2	down	down	up
mmu-miR-701-3p	Kif11	NONMMUG002566.2	down	down	up
mmu-miR-7240-5p	Kif11	NONMMUG002566.2	down	down	up
mmu-miR-7b-5p	Kif11	NONMMUG002566.2	down	down	up
mmu-miR-879-3p	Kif11	NONMMUG002566.2	down	down	up
mmu-miR-103-2-5p	Kif11	NONMMUG061335.1	down	down	up
mmu-miR-1193-3p	Kif11	NONMMUG061335.1	down	down	up
mmu-miR-134-3p	Kif11	NONMMUG061335.1	down	down	up
mmu-miR-1969	Kif11	NONMMUG061335.1	down	down	up
mmu-miR-196a-5p	Kif11	NONMMUG061335.1	down	down	up
mmu-miR-3072-3p	Kif11	NONMMUG061335.1	down	down	up
mmu-miR-376a-3p	Kif11	NONMMUG061335.1	down	down	up
mmu-miR-376a-5p	Kif11	NONMMUG061335.1	down	down	up
mmu-miR-377-5p	Kif11	NONMMUG061335.1	down	down	up
mmu-miR-412-5p	Kif11	NONMMUG061335.1	down	down	up
mmu-miR-483-3p	Kif11	NONMMUG061335.1	down	down	up
mmu-miR-677-5p	Kif11	NONMMUG061335.1	down	down	up
mmu-miR-6947-5p	Kif11	NONMMUG061335.1	down	down	up
mmu-miR-701-3p	Kif11	NONMMUG061335.1	down	down	up
mmu-miR-7240-5p	Kif11	NONMMUG061335.1	down	down	up
mmu-miR-7b-5p	Kif11	NONMMUG061335.1	down	down	up
mmu-miR-879-3p	Kif11	NONMMUG061335.1	down	down	up
mmu-miR-1193-3p	Cma1	NONMMUG046321.2	down	down	up
mmu-miR-3072-3p	Cma1	NONMMUG046321.2	down	down	up
mmu-miR-376a-3p	Cma1	NONMMUG046321.2	down	down	up
mmu-miR-376a-5p	Cma1	NONMMUG046321.2	down	down	up
mmu-miR-377-5p	Cma1	NONMMUG046321.2	down	down	up
mmu-miR-677-5p	Cma1	NONMMUG046321.2	down	down	up
mmu-miR-879-3p	Cma1	NONMMUG046321.2	down	down	up
mmu-miR-103-2-5p	Tifab	NONMMUG005645.2	down	down	up
mmu-miR-1193-3p	Tifab	NONMMUG005645.2	down	down	up
mmu-miR-134-3p	Tifab	NONMMUG005645.2	down	down	up
mmu-miR-1969	Tifab	NONMMUG005645.2	down	down	up
mmu-miR-196a-5p	Tifab	NONMMUG005645.2	down	down	up
mmu-miR-3072-3p	Tifab	NONMMUG005645.2	down	down	up
mmu-miR-376a-5p	Tifab	NONMMUG005645.2	down	down	up
mmu-miR-412-5p	Tifab	NONMMUG005645.2	down	down	up
mmu-miR-483-3p	Tifab	NONMMUG005645.2	down	down	up
mmu-miR-677-5p	Tifab	NONMMUG005645.2	down	down	up
mmu-miR-701-3p	Tifab	NONMMUG005645.2	down	down	up
mmu-miR-7240-5p	Tifab	NONMMUG005645.2	down	down	up
mmu-miR-7b-5p	Tifab	NONMMUG005645.2	down	down	up
mmu-miR-879-3p	Tifab	NONMMUG005645.2	down	down	up
mmu-miR-1193-3p	Slfn8	NONMMUG000075.2	down	down	up
mmu-miR-3072-3p	Slfn8	NONMMUG000075.2	down	down	up
mmu-miR-376a-3p	Slfn8	NONMMUG000075.2	down	down	up
mmu-miR-376a-5p	Slfn8	NONMMUG000075.2	down	down	up
mmu-miR-377-5p	Slfn8	NONMMUG000075.2	down	down	up
mmu-miR-412-5p	Slfn8	NONMMUG000075.2	down	down	up
mmu-miR-677-5p	Slfn8	NONMMUG000075.2	down	down	up
mmu-miR-701-3p	Slfn8	NONMMUG000075.2	down	down	up
mmu-miR-7b-5p	Slfn8	NONMMUG000075.2	down	down	up
mmu-miR-879-3p	Slfn8	NONMMUG000075.2	down	down	up
mmu-miR-103-2-5p	Apol11b	NONMMUG061335.1	down	down	up
mmu-miR-1193-3p	Apol11b	NONMMUG061335.1	down	down	up
mmu-miR-134-3p	Apol11b	NONMMUG061335.1	down	down	up
mmu-miR-1969	Apol11b	NONMMUG061335.1	down	down	up
mmu-miR-196a-5p	Apol11b	NONMMUG061335.1	down	down	up
mmu-miR-3072-3p	Apol11b	NONMMUG061335.1	down	down	up
mmu-miR-376a-3p	Apol11b	NONMMUG061335.1	down	down	up
mmu-miR-376a-5p	Apol11b	NONMMUG061335.1	down	down	up
mmu-miR-377-5p	Apol11b	NONMMUG061335.1	down	down	up
mmu-miR-412-5p	Apol11b	NONMMUG061335.1	down	down	up
mmu-miR-483-3p	Apol11b	NONMMUG061335.1	down	down	up
mmu-miR-677-5p	Apol11b	NONMMUG061335.1	down	down	up
mmu-miR-6947-5p	Apol11b	NONMMUG061335.1	down	down	up
mmu-miR-701-3p	Apol11b	NONMMUG061335.1	down	down	up
mmu-miR-7240-5p	Apol11b	NONMMUG061335.1	down	down	up
mmu-miR-7b-5p	Apol11b	NONMMUG061335.1	down	down	up
mmu-miR-879-3p	Apol11b	NONMMUG061335.1	down	down	up
mmu-miR-1193-3p	Tcrg-V4	NONMMUG057093.1	down	down	up
mmu-miR-134-3p	Tcrg-V4	NONMMUG057093.1	down	down	up
mmu-miR-1969	Tcrg-V4	NONMMUG057093.1	down	down	up
mmu-miR-196a-5p	Tcrg-V4	NONMMUG057093.1	down	down	up
mmu-miR-3072-3p	Tcrg-V4	NONMMUG057093.1	down	down	up
mmu-miR-412-5p	Tcrg-V4	NONMMUG057093.1	down	down	up
mmu-miR-483-3p	Tcrg-V4	NONMMUG057093.1	down	down	up
mmu-miR-677-5p	Tcrg-V4	NONMMUG057093.1	down	down	up
mmu-miR-7240-5p	Tcrg-V4	NONMMUG057093.1	down	down	up
mmu-miR-1193-3p	Manf	NONMMUG046321.2	down	down	up
mmu-miR-3072-3p	Manf	NONMMUG046321.2	down	down	up
mmu-miR-376a-3p	Manf	NONMMUG046321.2	down	down	up
mmu-miR-376a-5p	Manf	NONMMUG046321.2	down	down	up
mmu-miR-376c-5p	Manf	NONMMUG046321.2	down	down	up
mmu-miR-377-5p	Manf	NONMMUG046321.2	down	down	up
mmu-miR-677-5p	Manf	NONMMUG046321.2	down	down	up
mmu-miR-879-3p	Manf	NONMMUG046321.2	down	down	up
mmu-miR-1969	Fam189a1	NONMMUG051962.1	down	down	up
mmu-miR-1199-5p	Snx11	NONMMUG027420.2	up	up	down
mmu-miR-12191-3p	Snx11	NONMMUG027420.2	up	up	down
mmu-miR-129-5p	Snx11	NONMMUG027420.2	up	up	down
mmu-miR-1298-5p	Snx11	NONMMUG027420.2	up	up	down
mmu-miR-146a-3p	Snx11	NONMMUG027420.2	up	up	down
mmu-miR-201-5p	Snx11	NONMMUG027420.2	up	up	down
mmu-miR-204-3p	Snx11	NONMMUG027420.2	up	up	down
mmu-miR-384-3p	Snx11	NONMMUG027420.2	up	up	down
mmu-miR-449a-3p	Snx11	NONMMUG027420.2	up	up	down
mmu-miR-449c-5p	Snx11	NONMMUG027420.2	up	up	down
mmu-miR-465b-5p	Snx11	NONMMUG027420.2	up	up	down
mmu-miR-489-3p	Snx11	NONMMUG027420.2	up	up	down
mmu-miR-5103	Snx11	NONMMUG027420.2	up	up	down
mmu-miR-653-3p	Snx11	NONMMUG027420.2	up	up	down
mmu-miR-653-5p	Snx11	NONMMUG027420.2	up	up	down
mmu-miR-7063-3p	Snx11	NONMMUG027420.2	up	up	down
mmu-miR-7661-5p	Snx11	NONMMUG027420.2	up	up	down
mmu-miR-7667-5p	Snx11	NONMMUG027420.2	up	up	down
mmu-miR-871-3p	Snx11	NONMMUG027420.2	up	up	down
mmu-miR-881-3p	Snx11	NONMMUG027420.2	up	up	down
mmu-miR-1193-3p	Ube2c	NONMMUG019867.3	down	down	up
mmu-miR-134-3p	Ube2c	NONMMUG019867.3	down	down	up
mmu-miR-1969	Ube2c	NONMMUG019867.3	down	down	up
mmu-miR-196a-5p	Ube2c	NONMMUG019867.3	down	down	up
mmu-miR-3072-3p	Ube2c	NONMMUG019867.3	down	down	up
mmu-miR-376a-3p	Ube2c	NONMMUG019867.3	down	down	up
mmu-miR-376a-5p	Ube2c	NONMMUG019867.3	down	down	up
mmu-miR-3963	Ube2c	NONMMUG019867.3	down	down	up
mmu-miR-412-5p	Ube2c	NONMMUG019867.3	down	down	up
mmu-miR-483-3p	Ube2c	NONMMUG019867.3	down	down	up
mmu-miR-677-5p	Ube2c	NONMMUG019867.3	down	down	up
mmu-miR-6947-5p	Ube2c	NONMMUG019867.3	down	down	up
mmu-miR-701-3p	Ube2c	NONMMUG019867.3	down	down	up
mmu-miR-7240-5p	Ube2c	NONMMUG019867.3	down	down	up
mmu-miR-7b-5p	Ube2c	NONMMUG019867.3	down	down	up
mmu-miR-879-3p	Ube2c	NONMMUG019867.3	down	down	up
mmu-miR-129-5p	Hnrnpul1	NONMMUG024536.2	up	up	down
mmu-miR-129-5p	Hnrnpul1	NONMMUG008449.2	up	up	down
mmu-miR-129-5p	Hnrnpul1	NONMMUG002670.2	up	up	down
mmu-miR-129-5p	Hnrnpul1	NONMMUG066594.1	up	up	down
mmu-miR-1193-3p	Tbce	ENSMUSG00000075010	down	down	up
mmu-miR-196a-5p	Tbce	ENSMUSG00000075010	down	down	up
mmu-miR-3072-3p	Tbce	ENSMUSG00000075010	down	down	up
mmu-miR-483-3p	Tbce	ENSMUSG00000075010	down	down	up
mmu-miR-677-5p	Tbce	ENSMUSG00000075010	down	down	up
mmu-miR-7240-5p	Tbce	ENSMUSG00000075010	down	down	up
mmu-miR-103-2-5p	Bard1	NONMMUG019867.3	down	down	up
mmu-miR-1193-3p	Bard1	NONMMUG019867.3	down	down	up
mmu-miR-134-3p	Bard1	NONMMUG019867.3	down	down	up
mmu-miR-1969	Bard1	NONMMUG019867.3	down	down	up
mmu-miR-196a-5p	Bard1	NONMMUG019867.3	down	down	up
mmu-miR-3072-3p	Bard1	NONMMUG019867.3	down	down	up
mmu-miR-376a-3p	Bard1	NONMMUG019867.3	down	down	up
mmu-miR-376a-5p	Bard1	NONMMUG019867.3	down	down	up
mmu-miR-3963	Bard1	NONMMUG019867.3	down	down	up
mmu-miR-412-5p	Bard1	NONMMUG019867.3	down	down	up
mmu-miR-483-3p	Bard1	NONMMUG019867.3	down	down	up
mmu-miR-677-5p	Bard1	NONMMUG019867.3	down	down	up
mmu-miR-701-3p	Bard1	NONMMUG019867.3	down	down	up
mmu-miR-7240-5p	Bard1	NONMMUG019867.3	down	down	up
mmu-miR-7b-5p	Bard1	NONMMUG019867.3	down	down	up
mmu-miR-879-3p	Bard1	NONMMUG019867.3	down	down	up
mmu-miR-129-5p	Rchy1	NONMMUG090860.1	up	up	down
mmu-miR-204-3p	Rchy1	NONMMUG090860.1	up	up	down
mmu-miR-7679-3p	Rchy1	NONMMUG090860.1	up	up	down
mmu-miR-871-3p	Rchy1	NONMMUG090860.1	up	up	down
mmu-miR-1199-5p	Atp2a3	NONMMUG023774.2	up	up	down
mmu-miR-129-5p	Atp2a3	NONMMUG023774.2	up	up	down
mmu-miR-204-3p	Atp2a3	NONMMUG023774.2	up	up	down
mmu-miR-384-3p	Atp2a3	NONMMUG023774.2	up	up	down
mmu-miR-449a-3p	Atp2a3	NONMMUG023774.2	up	up	down
mmu-miR-5103	Atp2a3	NONMMUG023774.2	up	up	down
mmu-miR-653-5p	Atp2a3	NONMMUG023774.2	up	up	down
mmu-miR-871-3p	Atp2a3	NONMMUG023774.2	up	up	down
mmu-miR-1199-5p	Atp2a3	NONMMUG066522.1	up	up	down
mmu-miR-129-5p	Atp2a3	NONMMUG066522.1	up	up	down
mmu-miR-1298-5p	Atp2a3	NONMMUG066522.1	up	up	down
mmu-miR-204-3p	Atp2a3	NONMMUG066522.1	up	up	down
mmu-miR-384-3p	Atp2a3	NONMMUG066522.1	up	up	down
mmu-miR-449a-3p	Atp2a3	NONMMUG066522.1	up	up	down
mmu-miR-5103	Atp2a3	NONMMUG066522.1	up	up	down
mmu-miR-653-5p	Atp2a3	NONMMUG066522.1	up	up	down
mmu-miR-871-3p	Atp2a3	NONMMUG066522.1	up	up	down
mmu-miR-881-3p	Atp2a3	NONMMUG066522.1	up	up	down
mmu-miR-1199-5p	Atp2a3	NONMMUG025014.2	up	up	down
mmu-miR-129-5p	Atp2a3	NONMMUG025014.2	up	up	down
mmu-miR-1298-5p	Atp2a3	NONMMUG025014.2	up	up	down
mmu-miR-204-3p	Atp2a3	NONMMUG025014.2	up	up	down
mmu-miR-384-3p	Atp2a3	NONMMUG025014.2	up	up	down
mmu-miR-449a-3p	Atp2a3	NONMMUG025014.2	up	up	down
mmu-miR-5103	Atp2a3	NONMMUG025014.2	up	up	down
mmu-miR-653-5p	Atp2a3	NONMMUG025014.2	up	up	down
mmu-miR-871-3p	Atp2a3	NONMMUG025014.2	up	up	down
mmu-miR-881-3p	Atp2a3	NONMMUG025014.2	up	up	down
mmu-miR-1199-5p	Atp2a3	NONMMUG087654.1	up	up	down
mmu-miR-129-5p	Atp2a3	NONMMUG087654.1	up	up	down
mmu-miR-1298-5p	Atp2a3	NONMMUG087654.1	up	up	down
mmu-miR-204-3p	Atp2a3	NONMMUG087654.1	up	up	down
mmu-miR-384-3p	Atp2a3	NONMMUG087654.1	up	up	down
mmu-miR-449a-3p	Atp2a3	NONMMUG087654.1	up	up	down
mmu-miR-489-3p	Atp2a3	NONMMUG087654.1	up	up	down
mmu-miR-5103	Atp2a3	NONMMUG087654.1	up	up	down
mmu-miR-653-5p	Atp2a3	NONMMUG087654.1	up	up	down
mmu-miR-7679-3p	Atp2a3	NONMMUG087654.1	up	up	down
mmu-miR-871-3p	Atp2a3	NONMMUG087654.1	up	up	down
mmu-miR-881-3p	Atp2a3	NONMMUG087654.1	up	up	down
mmu-miR-103-2-5p	Aplp2	NONMMUG005645.2	down	down	up
mmu-miR-1193-3p	Aplp2	NONMMUG005645.2	down	down	up
mmu-miR-134-3p	Aplp2	NONMMUG005645.2	down	down	up
mmu-miR-1969	Aplp2	NONMMUG005645.2	down	down	up
mmu-miR-196a-5p	Aplp2	NONMMUG005645.2	down	down	up
mmu-miR-3072-3p	Aplp2	NONMMUG005645.2	down	down	up
mmu-miR-376a-3p	Aplp2	NONMMUG005645.2	down	down	up
mmu-miR-376a-5p	Aplp2	NONMMUG005645.2	down	down	up
mmu-miR-412-5p	Aplp2	NONMMUG005645.2	down	down	up
mmu-miR-483-3p	Aplp2	NONMMUG005645.2	down	down	up
mmu-miR-677-5p	Aplp2	NONMMUG005645.2	down	down	up
mmu-miR-7240-5p	Aplp2	NONMMUG005645.2	down	down	up
mmu-miR-7b-5p	Aplp2	NONMMUG005645.2	down	down	up
mmu-miR-879-3p	Aplp2	NONMMUG005645.2	down	down	up
mmu-miR-103-2-5p	Gpaa1	NONMMUG007271.2	down	down	up
mmu-miR-134-3p	Gpaa1	NONMMUG007271.2	down	down	up
mmu-miR-412-5p	Gpaa1	NONMMUG007271.2	down	down	up
mmu-miR-483-3p	Gpaa1	NONMMUG007271.2	down	down	up
mmu-miR-7240-5p	Gpaa1	NONMMUG007271.2	down	down	up
mmu-miR-146a-3p	Vldlr	NONMMUG077213.1	up	up	down
mmu-miR-129-5p	Vldlr	NONMMUG008449.2	up	up	down
mmu-miR-384-3p	Vldlr	NONMMUG008449.2	up	up	down
mmu-miR-449a-3p	Vldlr	NONMMUG008449.2	up	up	down
mmu-miR-1193-3p	Aunip	NONMMUG009055.3	down	down	up
mmu-miR-134-3p	Aunip	NONMMUG009055.3	down	down	up
mmu-miR-1969	Aunip	NONMMUG009055.3	down	down	up
mmu-miR-196a-5p	Aunip	NONMMUG009055.3	down	down	up
mmu-miR-3072-3p	Aunip	NONMMUG009055.3	down	down	up
mmu-miR-412-5p	Aunip	NONMMUG009055.3	down	down	up
mmu-miR-483-3p	Aunip	NONMMUG009055.3	down	down	up
mmu-miR-677-5p	Aunip	NONMMUG009055.3	down	down	up
mmu-miR-701-3p	Aunip	NONMMUG009055.3	down	down	up
mmu-miR-7240-5p	Aunip	NONMMUG009055.3	down	down	up
mmu-miR-7b-5p	Aunip	NONMMUG009055.3	down	down	up
mmu-miR-879-3p	Aunip	NONMMUG009055.3	down	down	up
mmu-miR-129-5p	Fkbp8	NONMMUG008449.2	up	up	down
mmu-miR-384-3p	Fkbp8	NONMMUG008449.2	up	up	down
mmu-miR-449a-3p	Fkbp8	NONMMUG008449.2	up	up	down
mmu-miR-5103	Fkbp8	NONMMUG008449.2	up	up	down
mmu-miR-129-5p	Rnf103	NONMMUG008449.2	up	up	down
mmu-miR-384-3p	Rnf103	NONMMUG008449.2	up	up	down
mmu-miR-5103	Rnf103	NONMMUG008449.2	up	up	down
mmu-miR-129-5p	Rnf103	NONMMUG072834.1	up	up	down
mmu-miR-384-3p	Rnf103	NONMMUG072834.1	up	up	down
mmu-miR-5103	Rnf103	NONMMUG072834.1	up	up	down
mmu-miR-129-5p	Rnf103	NONMMUG066594.1	up	up	down
mmu-miR-384-3p	Rnf103	NONMMUG066594.1	up	up	down
mmu-miR-5103	Rnf103	NONMMUG066594.1	up	up	down
mmu-miR-1193-3p	Shcbp1	NONMMUG061335.1	down	down	up
mmu-miR-134-3p	Shcbp1	NONMMUG061335.1	down	down	up
mmu-miR-1969	Shcbp1	NONMMUG061335.1	down	down	up
mmu-miR-196a-5p	Shcbp1	NONMMUG061335.1	down	down	up
mmu-miR-3072-3p	Shcbp1	NONMMUG061335.1	down	down	up
mmu-miR-376a-3p	Shcbp1	NONMMUG061335.1	down	down	up
mmu-miR-376a-5p	Shcbp1	NONMMUG061335.1	down	down	up
mmu-miR-377-5p	Shcbp1	NONMMUG061335.1	down	down	up
mmu-miR-412-5p	Shcbp1	NONMMUG061335.1	down	down	up
mmu-miR-483-3p	Shcbp1	NONMMUG061335.1	down	down	up
mmu-miR-677-5p	Shcbp1	NONMMUG061335.1	down	down	up
mmu-miR-6947-5p	Shcbp1	NONMMUG061335.1	down	down	up
mmu-miR-701-3p	Shcbp1	NONMMUG061335.1	down	down	up
mmu-miR-7240-5p	Shcbp1	NONMMUG061335.1	down	down	up
mmu-miR-7b-5p	Shcbp1	NONMMUG061335.1	down	down	up
mmu-miR-879-3p	Shcbp1	NONMMUG061335.1	down	down	up
mmu-miR-1199-5p	Tshz2	NONMMUG027420.2	up	up	down
mmu-miR-12191-3p	Tshz2	NONMMUG027420.2	up	up	down
mmu-miR-129-5p	Tshz2	NONMMUG027420.2	up	up	down
mmu-miR-1298-5p	Tshz2	NONMMUG027420.2	up	up	down
mmu-miR-146a-3p	Tshz2	NONMMUG027420.2	up	up	down
mmu-miR-1912-3p	Tshz2	NONMMUG027420.2	up	up	down
mmu-miR-201-5p	Tshz2	NONMMUG027420.2	up	up	down
mmu-miR-204-3p	Tshz2	NONMMUG027420.2	up	up	down
mmu-miR-384-3p	Tshz2	NONMMUG027420.2	up	up	down
mmu-miR-448-3p	Tshz2	NONMMUG027420.2	up	up	down
mmu-miR-449a-3p	Tshz2	NONMMUG027420.2	up	up	down
mmu-miR-449c-5p	Tshz2	NONMMUG027420.2	up	up	down
mmu-miR-465b-5p	Tshz2	NONMMUG027420.2	up	up	down
mmu-miR-489-3p	Tshz2	NONMMUG027420.2	up	up	down
mmu-miR-5103	Tshz2	NONMMUG027420.2	up	up	down
mmu-miR-653-3p	Tshz2	NONMMUG027420.2	up	up	down
mmu-miR-653-5p	Tshz2	NONMMUG027420.2	up	up	down
mmu-miR-7063-3p	Tshz2	NONMMUG027420.2	up	up	down
mmu-miR-7661-5p	Tshz2	NONMMUG027420.2	up	up	down
mmu-miR-7667-5p	Tshz2	NONMMUG027420.2	up	up	down
mmu-miR-871-3p	Tshz2	NONMMUG027420.2	up	up	down
mmu-miR-881-3p	Tshz2	NONMMUG027420.2	up	up	down
mmu-miR-103-2-5p	Greb1	NONMMUG022225.2	down	down	up
mmu-miR-1193-3p	Greb1	NONMMUG022225.2	down	down	up
mmu-miR-134-3p	Greb1	NONMMUG022225.2	down	down	up
mmu-miR-1969	Greb1	NONMMUG022225.2	down	down	up
mmu-miR-196a-5p	Greb1	NONMMUG022225.2	down	down	up
mmu-miR-3072-3p	Greb1	NONMMUG022225.2	down	down	up
mmu-miR-376a-3p	Greb1	NONMMUG022225.2	down	down	up
mmu-miR-376a-5p	Greb1	NONMMUG022225.2	down	down	up
mmu-miR-377-5p	Greb1	NONMMUG022225.2	down	down	up
mmu-miR-412-5p	Greb1	NONMMUG022225.2	down	down	up
mmu-miR-483-3p	Greb1	NONMMUG022225.2	down	down	up
mmu-miR-677-5p	Greb1	NONMMUG022225.2	down	down	up
mmu-miR-6947-5p	Greb1	NONMMUG022225.2	down	down	up
mmu-miR-701-3p	Greb1	NONMMUG022225.2	down	down	up
mmu-miR-7240-5p	Greb1	NONMMUG022225.2	down	down	up
mmu-miR-7b-5p	Greb1	NONMMUG022225.2	down	down	up
mmu-miR-879-3p	Greb1	NONMMUG022225.2	down	down	up
mmu-miR-1199-5p	Txnip	NONMMUG025014.2	up	up	down
mmu-miR-129-5p	Txnip	NONMMUG025014.2	up	up	down
mmu-miR-204-3p	Txnip	NONMMUG025014.2	up	up	down
mmu-miR-384-3p	Txnip	NONMMUG025014.2	up	up	down
mmu-miR-449a-3p	Txnip	NONMMUG025014.2	up	up	down
mmu-miR-5103	Txnip	NONMMUG025014.2	up	up	down
mmu-miR-653-5p	Txnip	NONMMUG025014.2	up	up	down
mmu-miR-871-3p	Txnip	NONMMUG025014.2	up	up	down
mmu-miR-881-3p	Txnip	NONMMUG025014.2	up	up	down
mmu-miR-129-5p	Txnip	NONMMUG045603.2	up	up	down
mmu-miR-204-3p	Txnip	NONMMUG045603.2	up	up	down
mmu-miR-384-3p	Txnip	NONMMUG045603.2	up	up	down
mmu-miR-449a-3p	Txnip	NONMMUG045603.2	up	up	down
mmu-miR-5103	Txnip	NONMMUG045603.2	up	up	down
mmu-miR-653-5p	Txnip	NONMMUG045603.2	up	up	down
mmu-miR-871-3p	Txnip	NONMMUG045603.2	up	up	down
mmu-miR-881-3p	Txnip	NONMMUG045603.2	up	up	down
mmu-miR-129-5p	Txnip	NONMMUG066594.1	up	up	down
mmu-miR-384-3p	Txnip	NONMMUG066594.1	up	up	down
mmu-miR-5103	Txnip	NONMMUG066594.1	up	up	down
mmu-miR-1193-3p	Ncapd2	NONMMUG002566.2	down	down	up
mmu-miR-134-3p	Ncapd2	NONMMUG002566.2	down	down	up
mmu-miR-1969	Ncapd2	NONMMUG002566.2	down	down	up
mmu-miR-196a-5p	Ncapd2	NONMMUG002566.2	down	down	up
mmu-miR-3072-3p	Ncapd2	NONMMUG002566.2	down	down	up
mmu-miR-376a-3p	Ncapd2	NONMMUG002566.2	down	down	up
mmu-miR-376a-5p	Ncapd2	NONMMUG002566.2	down	down	up
mmu-miR-377-5p	Ncapd2	NONMMUG002566.2	down	down	up
mmu-miR-412-5p	Ncapd2	NONMMUG002566.2	down	down	up
mmu-miR-483-3p	Ncapd2	NONMMUG002566.2	down	down	up
mmu-miR-677-5p	Ncapd2	NONMMUG002566.2	down	down	up
mmu-miR-701-3p	Ncapd2	NONMMUG002566.2	down	down	up
mmu-miR-7240-5p	Ncapd2	NONMMUG002566.2	down	down	up
mmu-miR-7b-5p	Ncapd2	NONMMUG002566.2	down	down	up
mmu-miR-879-3p	Ncapd2	NONMMUG002566.2	down	down	up
mmu-miR-103-2-5p	Ncapd2	NONMMUG061335.1	down	down	up
mmu-miR-1193-3p	Ncapd2	NONMMUG061335.1	down	down	up
mmu-miR-134-3p	Ncapd2	NONMMUG061335.1	down	down	up
mmu-miR-1969	Ncapd2	NONMMUG061335.1	down	down	up
mmu-miR-196a-5p	Ncapd2	NONMMUG061335.1	down	down	up
mmu-miR-3072-3p	Ncapd2	NONMMUG061335.1	down	down	up
mmu-miR-376a-3p	Ncapd2	NONMMUG061335.1	down	down	up
mmu-miR-376a-5p	Ncapd2	NONMMUG061335.1	down	down	up
mmu-miR-377-5p	Ncapd2	NONMMUG061335.1	down	down	up
mmu-miR-412-5p	Ncapd2	NONMMUG061335.1	down	down	up
mmu-miR-483-3p	Ncapd2	NONMMUG061335.1	down	down	up
mmu-miR-677-5p	Ncapd2	NONMMUG061335.1	down	down	up
mmu-miR-701-3p	Ncapd2	NONMMUG061335.1	down	down	up
mmu-miR-7240-5p	Ncapd2	NONMMUG061335.1	down	down	up
mmu-miR-7b-5p	Ncapd2	NONMMUG061335.1	down	down	up
mmu-miR-879-3p	Ncapd2	NONMMUG061335.1	down	down	up
mmu-miR-103-2-5p	Racgap1	NONMMUG029249.2	down	down	up
mmu-miR-1193-3p	Racgap1	NONMMUG029249.2	down	down	up
mmu-miR-134-3p	Racgap1	NONMMUG029249.2	down	down	up
mmu-miR-1969	Racgap1	NONMMUG029249.2	down	down	up
mmu-miR-196a-5p	Racgap1	NONMMUG029249.2	down	down	up
mmu-miR-3072-3p	Racgap1	NONMMUG029249.2	down	down	up
mmu-miR-376a-3p	Racgap1	NONMMUG029249.2	down	down	up
mmu-miR-376a-5p	Racgap1	NONMMUG029249.2	down	down	up
mmu-miR-377-5p	Racgap1	NONMMUG029249.2	down	down	up
mmu-miR-412-5p	Racgap1	NONMMUG029249.2	down	down	up
mmu-miR-483-3p	Racgap1	NONMMUG029249.2	down	down	up
mmu-miR-677-5p	Racgap1	NONMMUG029249.2	down	down	up
mmu-miR-701-3p	Racgap1	NONMMUG029249.2	down	down	up
mmu-miR-7240-5p	Racgap1	NONMMUG029249.2	down	down	up
mmu-miR-7b-5p	Racgap1	NONMMUG029249.2	down	down	up
mmu-miR-879-3p	Racgap1	NONMMUG029249.2	down	down	up
mmu-miR-1199-5p	Ube2f	NONMMUG036652.2	up	up	down
mmu-miR-129-5p	Ube2f	NONMMUG036652.2	up	up	down
mmu-miR-1298-5p	Ube2f	NONMMUG036652.2	up	up	down
mmu-miR-204-3p	Ube2f	NONMMUG036652.2	up	up	down
mmu-miR-384-3p	Ube2f	NONMMUG036652.2	up	up	down
mmu-miR-449a-3p	Ube2f	NONMMUG036652.2	up	up	down
mmu-miR-497a-3p	Ube2f	NONMMUG036652.2	up	up	down
mmu-miR-5103	Ube2f	NONMMUG036652.2	up	up	down
mmu-miR-653-5p	Ube2f	NONMMUG036652.2	up	up	down
mmu-miR-103-2-5p	Taf6l	NONMMUG036781.3	down	down	up
mmu-miR-1193-3p	Taf6l	NONMMUG036781.3	down	down	up
mmu-miR-134-3p	Taf6l	NONMMUG036781.3	down	down	up
mmu-miR-1969	Taf6l	NONMMUG036781.3	down	down	up
mmu-miR-196a-5p	Taf6l	NONMMUG036781.3	down	down	up
mmu-miR-3072-3p	Taf6l	NONMMUG036781.3	down	down	up
mmu-miR-376a-3p	Taf6l	NONMMUG036781.3	down	down	up
mmu-miR-376a-5p	Taf6l	NONMMUG036781.3	down	down	up
mmu-miR-376c-5p	Taf6l	NONMMUG036781.3	down	down	up
mmu-miR-377-5p	Taf6l	NONMMUG036781.3	down	down	up
mmu-miR-483-3p	Taf6l	NONMMUG036781.3	down	down	up
mmu-miR-677-5p	Taf6l	NONMMUG036781.3	down	down	up
mmu-miR-7240-5p	Taf6l	NONMMUG036781.3	down	down	up
mmu-miR-7b-5p	Taf6l	NONMMUG036781.3	down	down	up
mmu-miR-879-3p	Taf6l	NONMMUG036781.3	down	down	up
mmu-miR-1193-3p	Zc3h12d	NONMMUG051012.2	down	down	up
mmu-miR-134-3p	Zc3h12d	NONMMUG051012.2	down	down	up
mmu-miR-1969	Zc3h12d	NONMMUG051012.2	down	down	up
mmu-miR-196a-5p	Zc3h12d	NONMMUG051012.2	down	down	up
mmu-miR-3072-3p	Zc3h12d	NONMMUG051012.2	down	down	up
mmu-miR-376a-3p	Zc3h12d	NONMMUG051012.2	down	down	up
mmu-miR-376a-5p	Zc3h12d	NONMMUG051012.2	down	down	up
mmu-miR-3963	Zc3h12d	NONMMUG051012.2	down	down	up
mmu-miR-412-5p	Zc3h12d	NONMMUG051012.2	down	down	up
mmu-miR-483-3p	Zc3h12d	NONMMUG051012.2	down	down	up
mmu-miR-677-5p	Zc3h12d	NONMMUG051012.2	down	down	up
mmu-miR-6947-5p	Zc3h12d	NONMMUG051012.2	down	down	up
mmu-miR-701-3p	Zc3h12d	NONMMUG051012.2	down	down	up
mmu-miR-7b-5p	Zc3h12d	NONMMUG051012.2	down	down	up
mmu-miR-879-3p	Zc3h12d	NONMMUG051012.2	down	down	up
mmu-miR-129-5p	Mid2	NONMMUG036054.2	up	up	down
mmu-miR-129-5p	Mid2	NONMMUG072834.1	up	up	down
mmu-miR-129-5p	Mid2	NONMMUG017114.2	up	up	down
mmu-miR-1199-5p	Uty	NONMMUG027420.2	up	up	down
mmu-miR-12191-3p	Uty	NONMMUG027420.2	up	up	down
mmu-miR-129-2-3p	Uty	NONMMUG027420.2	up	up	down
mmu-miR-129-5p	Uty	NONMMUG027420.2	up	up	down
mmu-miR-1298-5p	Uty	NONMMUG027420.2	up	up	down
mmu-miR-146a-3p	Uty	NONMMUG027420.2	up	up	down
mmu-miR-1912-3p	Uty	NONMMUG027420.2	up	up	down
mmu-miR-204-3p	Uty	NONMMUG027420.2	up	up	down
mmu-miR-384-3p	Uty	NONMMUG027420.2	up	up	down
mmu-miR-448-3p	Uty	NONMMUG027420.2	up	up	down
mmu-miR-449a-3p	Uty	NONMMUG027420.2	up	up	down
mmu-miR-449c-5p	Uty	NONMMUG027420.2	up	up	down
mmu-miR-489-3p	Uty	NONMMUG027420.2	up	up	down
mmu-miR-497a-3p	Uty	NONMMUG027420.2	up	up	down
mmu-miR-5103	Uty	NONMMUG027420.2	up	up	down
mmu-miR-653-3p	Uty	NONMMUG027420.2	up	up	down
mmu-miR-653-5p	Uty	NONMMUG027420.2	up	up	down
mmu-miR-7063-3p	Uty	NONMMUG027420.2	up	up	down
mmu-miR-7661-5p	Uty	NONMMUG027420.2	up	up	down
mmu-miR-7667-5p	Uty	NONMMUG027420.2	up	up	down
mmu-miR-871-3p	Uty	NONMMUG027420.2	up	up	down
mmu-miR-881-3p	Uty	NONMMUG027420.2	up	up	down
mmu-miR-1199-5p	Mtmr12	NONMMUG025014.2	up	up	down
mmu-miR-129-5p	Mtmr12	NONMMUG025014.2	up	up	down
mmu-miR-1298-5p	Mtmr12	NONMMUG025014.2	up	up	down
mmu-miR-204-3p	Mtmr12	NONMMUG025014.2	up	up	down
mmu-miR-384-3p	Mtmr12	NONMMUG025014.2	up	up	down
mmu-miR-449a-3p	Mtmr12	NONMMUG025014.2	up	up	down
mmu-miR-5103	Mtmr12	NONMMUG025014.2	up	up	down
mmu-miR-653-5p	Mtmr12	NONMMUG025014.2	up	up	down
mmu-miR-871-3p	Mtmr12	NONMMUG025014.2	up	up	down
mmu-miR-881-3p	Mtmr12	NONMMUG025014.2	up	up	down
mmu-miR-129-5p	Mtmr12	NONMMUG045603.2	up	up	down
mmu-miR-204-3p	Mtmr12	NONMMUG045603.2	up	up	down
mmu-miR-384-3p	Mtmr12	NONMMUG045603.2	up	up	down
mmu-miR-449a-3p	Mtmr12	NONMMUG045603.2	up	up	down
mmu-miR-5103	Mtmr12	NONMMUG045603.2	up	up	down
mmu-miR-653-5p	Mtmr12	NONMMUG045603.2	up	up	down
mmu-miR-871-3p	Mtmr12	NONMMUG045603.2	up	up	down
mmu-miR-881-3p	Mtmr12	NONMMUG045603.2	up	up	down
mmu-miR-1193-3p	Rad54l	NONMMUG002566.2	down	down	up
mmu-miR-196a-5p	Rad54l	NONMMUG002566.2	down	down	up
mmu-miR-3072-3p	Rad54l	NONMMUG002566.2	down	down	up
mmu-miR-376a-3p	Rad54l	NONMMUG002566.2	down	down	up
mmu-miR-376a-5p	Rad54l	NONMMUG002566.2	down	down	up
mmu-miR-377-5p	Rad54l	NONMMUG002566.2	down	down	up
mmu-miR-412-5p	Rad54l	NONMMUG002566.2	down	down	up
mmu-miR-483-3p	Rad54l	NONMMUG002566.2	down	down	up
mmu-miR-677-5p	Rad54l	NONMMUG002566.2	down	down	up
mmu-miR-701-3p	Rad54l	NONMMUG002566.2	down	down	up
mmu-miR-7240-5p	Rad54l	NONMMUG002566.2	down	down	up
mmu-miR-7b-5p	Rad54l	NONMMUG002566.2	down	down	up
mmu-miR-879-3p	Rad54l	NONMMUG002566.2	down	down	up
mmu-miR-1193-3p	Rad54b	NONMMUG002566.2	down	down	up
mmu-miR-134-3p	Rad54b	NONMMUG002566.2	down	down	up
mmu-miR-1969	Rad54b	NONMMUG002566.2	down	down	up
mmu-miR-196a-5p	Rad54b	NONMMUG002566.2	down	down	up
mmu-miR-3072-3p	Rad54b	NONMMUG002566.2	down	down	up
mmu-miR-376a-3p	Rad54b	NONMMUG002566.2	down	down	up
mmu-miR-376a-5p	Rad54b	NONMMUG002566.2	down	down	up
mmu-miR-377-5p	Rad54b	NONMMUG002566.2	down	down	up
mmu-miR-412-5p	Rad54b	NONMMUG002566.2	down	down	up
mmu-miR-483-3p	Rad54b	NONMMUG002566.2	down	down	up
mmu-miR-677-5p	Rad54b	NONMMUG002566.2	down	down	up
mmu-miR-6947-5p	Rad54b	NONMMUG002566.2	down	down	up
mmu-miR-701-3p	Rad54b	NONMMUG002566.2	down	down	up
mmu-miR-7240-5p	Rad54b	NONMMUG002566.2	down	down	up
mmu-miR-7b-5p	Rad54b	NONMMUG002566.2	down	down	up
mmu-miR-879-3p	Rad54b	NONMMUG002566.2	down	down	up
mmu-miR-103-2-5p	Rad54b	NONMMUG061335.1	down	down	up
mmu-miR-1193-3p	Rad54b	NONMMUG061335.1	down	down	up
mmu-miR-134-3p	Rad54b	NONMMUG061335.1	down	down	up
mmu-miR-1969	Rad54b	NONMMUG061335.1	down	down	up
mmu-miR-196a-5p	Rad54b	NONMMUG061335.1	down	down	up
mmu-miR-3072-3p	Rad54b	NONMMUG061335.1	down	down	up
mmu-miR-376a-3p	Rad54b	NONMMUG061335.1	down	down	up
mmu-miR-376a-5p	Rad54b	NONMMUG061335.1	down	down	up
mmu-miR-377-5p	Rad54b	NONMMUG061335.1	down	down	up
mmu-miR-412-5p	Rad54b	NONMMUG061335.1	down	down	up
mmu-miR-483-3p	Rad54b	NONMMUG061335.1	down	down	up
mmu-miR-677-5p	Rad54b	NONMMUG061335.1	down	down	up
mmu-miR-6947-5p	Rad54b	NONMMUG061335.1	down	down	up
mmu-miR-701-3p	Rad54b	NONMMUG061335.1	down	down	up
mmu-miR-7240-5p	Rad54b	NONMMUG061335.1	down	down	up
mmu-miR-7b-5p	Rad54b	NONMMUG061335.1	down	down	up
mmu-miR-879-3p	Rad54b	NONMMUG061335.1	down	down	up
mmu-miR-129-5p	Qsox1	NONMMUG024536.2	up	up	down
mmu-miR-204-3p	Qsox1	NONMMUG024536.2	up	up	down
mmu-miR-129-5p	Qsox1	NONMMUG025014.2	up	up	down
mmu-miR-204-3p	Qsox1	NONMMUG025014.2	up	up	down
mmu-miR-5103	Qsox1	NONMMUG025014.2	up	up	down
mmu-miR-129-5p	Qsox1	NONMMUG045603.2	up	up	down
mmu-miR-204-3p	Qsox1	NONMMUG045603.2	up	up	down
mmu-miR-5103	Qsox1	NONMMUG045603.2	up	up	down
mmu-miR-7679-3p	Qsox1	NONMMUG045603.2	up	up	down
mmu-miR-129-5p	Qsox1	NONMMUG017114.2	up	up	down
mmu-miR-204-3p	Qsox1	NONMMUG017114.2	up	up	down
mmu-miR-5103	Qsox1	NONMMUG017114.2	up	up	down
mmu-miR-1193-3p	Csf1	NONMMUG019867.3	down	down	up
mmu-miR-134-3p	Csf1	NONMMUG019867.3	down	down	up
mmu-miR-1969	Csf1	NONMMUG019867.3	down	down	up
mmu-miR-196a-5p	Csf1	NONMMUG019867.3	down	down	up
mmu-miR-3072-3p	Csf1	NONMMUG019867.3	down	down	up
mmu-miR-376a-3p	Csf1	NONMMUG019867.3	down	down	up
mmu-miR-376a-5p	Csf1	NONMMUG019867.3	down	down	up
mmu-miR-3963	Csf1	NONMMUG019867.3	down	down	up
mmu-miR-412-5p	Csf1	NONMMUG019867.3	down	down	up
mmu-miR-483-3p	Csf1	NONMMUG019867.3	down	down	up
mmu-miR-677-5p	Csf1	NONMMUG019867.3	down	down	up
mmu-miR-6947-5p	Csf1	NONMMUG019867.3	down	down	up
mmu-miR-701-3p	Csf1	NONMMUG019867.3	down	down	up
mmu-miR-7240-5p	Csf1	NONMMUG019867.3	down	down	up
mmu-miR-7b-5p	Csf1	NONMMUG019867.3	down	down	up
mmu-miR-879-3p	Csf1	NONMMUG019867.3	down	down	up
mmu-miR-146a-3p	Hnrnpc	NONMMUG077213.1	up	up	down
mmu-miR-1193-3p	C4b	NONMMUG051012.2	down	down	up
mmu-miR-134-3p	C4b	NONMMUG051012.2	down	down	up
mmu-miR-1969	C4b	NONMMUG051012.2	down	down	up
mmu-miR-196a-5p	C4b	NONMMUG051012.2	down	down	up
mmu-miR-3072-3p	C4b	NONMMUG051012.2	down	down	up
mmu-miR-376a-3p	C4b	NONMMUG051012.2	down	down	up
mmu-miR-376a-5p	C4b	NONMMUG051012.2	down	down	up
mmu-miR-377-5p	C4b	NONMMUG051012.2	down	down	up
mmu-miR-3963	C4b	NONMMUG051012.2	down	down	up
mmu-miR-412-5p	C4b	NONMMUG051012.2	down	down	up
mmu-miR-483-3p	C4b	NONMMUG051012.2	down	down	up
mmu-miR-677-5p	C4b	NONMMUG051012.2	down	down	up
mmu-miR-6947-5p	C4b	NONMMUG051012.2	down	down	up
mmu-miR-701-3p	C4b	NONMMUG051012.2	down	down	up
mmu-miR-7240-5p	C4b	NONMMUG051012.2	down	down	up
mmu-miR-7b-5p	C4b	NONMMUG051012.2	down	down	up
mmu-miR-879-3p	C4b	NONMMUG051012.2	down	down	up
mmu-miR-103-2-5p	Arhgap39	NONMMUG044362.2	down	down	up
mmu-miR-1193-3p	Arhgap39	NONMMUG044362.2	down	down	up
mmu-miR-134-3p	Arhgap39	NONMMUG044362.2	down	down	up
mmu-miR-1969	Arhgap39	NONMMUG044362.2	down	down	up
mmu-miR-196a-5p	Arhgap39	NONMMUG044362.2	down	down	up
mmu-miR-3072-3p	Arhgap39	NONMMUG044362.2	down	down	up
mmu-miR-376a-3p	Arhgap39	NONMMUG044362.2	down	down	up
mmu-miR-376a-5p	Arhgap39	NONMMUG044362.2	down	down	up
mmu-miR-377-5p	Arhgap39	NONMMUG044362.2	down	down	up
mmu-miR-412-5p	Arhgap39	NONMMUG044362.2	down	down	up
mmu-miR-483-3p	Arhgap39	NONMMUG044362.2	down	down	up
mmu-miR-677-5p	Arhgap39	NONMMUG044362.2	down	down	up
mmu-miR-701-3p	Arhgap39	NONMMUG044362.2	down	down	up
mmu-miR-7240-5p	Arhgap39	NONMMUG044362.2	down	down	up
mmu-miR-7b-5p	Arhgap39	NONMMUG044362.2	down	down	up
mmu-miR-879-3p	Arhgap39	NONMMUG044362.2	down	down	up
mmu-miR-1193-3p	Ticrr	NONMMUG002566.2	down	down	up
mmu-miR-134-3p	Ticrr	NONMMUG002566.2	down	down	up
mmu-miR-1969	Ticrr	NONMMUG002566.2	down	down	up
mmu-miR-196a-5p	Ticrr	NONMMUG002566.2	down	down	up
mmu-miR-3072-3p	Ticrr	NONMMUG002566.2	down	down	up
mmu-miR-376a-3p	Ticrr	NONMMUG002566.2	down	down	up
mmu-miR-376a-5p	Ticrr	NONMMUG002566.2	down	down	up
mmu-miR-377-5p	Ticrr	NONMMUG002566.2	down	down	up
mmu-miR-412-5p	Ticrr	NONMMUG002566.2	down	down	up
mmu-miR-483-3p	Ticrr	NONMMUG002566.2	down	down	up
mmu-miR-677-5p	Ticrr	NONMMUG002566.2	down	down	up
mmu-miR-6947-5p	Ticrr	NONMMUG002566.2	down	down	up
mmu-miR-701-3p	Ticrr	NONMMUG002566.2	down	down	up
mmu-miR-7240-5p	Ticrr	NONMMUG002566.2	down	down	up
mmu-miR-7b-5p	Ticrr	NONMMUG002566.2	down	down	up
mmu-miR-879-3p	Ticrr	NONMMUG002566.2	down	down	up
mmu-miR-1193-3p	Ticrr	NONMMUG061335.1	down	down	up
mmu-miR-134-3p	Ticrr	NONMMUG061335.1	down	down	up
mmu-miR-1969	Ticrr	NONMMUG061335.1	down	down	up
mmu-miR-196a-5p	Ticrr	NONMMUG061335.1	down	down	up
mmu-miR-3072-3p	Ticrr	NONMMUG061335.1	down	down	up
mmu-miR-376a-3p	Ticrr	NONMMUG061335.1	down	down	up
mmu-miR-376a-5p	Ticrr	NONMMUG061335.1	down	down	up
mmu-miR-377-5p	Ticrr	NONMMUG061335.1	down	down	up
mmu-miR-412-5p	Ticrr	NONMMUG061335.1	down	down	up
mmu-miR-483-3p	Ticrr	NONMMUG061335.1	down	down	up
mmu-miR-677-5p	Ticrr	NONMMUG061335.1	down	down	up
mmu-miR-6947-5p	Ticrr	NONMMUG061335.1	down	down	up
mmu-miR-701-3p	Ticrr	NONMMUG061335.1	down	down	up
mmu-miR-7240-5p	Ticrr	NONMMUG061335.1	down	down	up
mmu-miR-7b-5p	Ticrr	NONMMUG061335.1	down	down	up
mmu-miR-879-3p	Ticrr	NONMMUG061335.1	down	down	up
mmu-miR-129-5p	Ctsh	NONMMUG008449.2	up	up	down
mmu-miR-384-3p	Ctsh	NONMMUG008449.2	up	up	down
mmu-miR-449a-3p	Ctsh	NONMMUG008449.2	up	up	down
mmu-miR-5103	Ctsh	NONMMUG008449.2	up	up	down
mmu-miR-7679-3p	Ddx24	NONMMUG066520.1	up	up	down
mmu-miR-103-2-5p	Tmem129	NONMMUG029249.2	down	down	up
mmu-miR-1193-3p	Tmem129	NONMMUG029249.2	down	down	up
mmu-miR-134-3p	Tmem129	NONMMUG029249.2	down	down	up
mmu-miR-1969	Tmem129	NONMMUG029249.2	down	down	up
mmu-miR-196a-5p	Tmem129	NONMMUG029249.2	down	down	up
mmu-miR-3072-3p	Tmem129	NONMMUG029249.2	down	down	up
mmu-miR-376a-3p	Tmem129	NONMMUG029249.2	down	down	up
mmu-miR-376a-5p	Tmem129	NONMMUG029249.2	down	down	up
mmu-miR-377-5p	Tmem129	NONMMUG029249.2	down	down	up
mmu-miR-412-5p	Tmem129	NONMMUG029249.2	down	down	up
mmu-miR-483-3p	Tmem129	NONMMUG029249.2	down	down	up
mmu-miR-677-5p	Tmem129	NONMMUG029249.2	down	down	up
mmu-miR-7240-5p	Tmem129	NONMMUG029249.2	down	down	up
mmu-miR-7b-5p	Tmem129	NONMMUG029249.2	down	down	up
mmu-miR-879-3p	Tmem129	NONMMUG029249.2	down	down	up
mmu-miR-103-2-5p	Sema3a	NONMMUG036851.2	down	down	up
mmu-miR-377-5p	Sema3a	NONMMUG036851.2	down	down	up
mmu-miR-7240-5p	Sema3a	NONMMUG036851.2	down	down	up
mmu-miR-1193-3p	Sel1l	NONMMUG036594.2	down	down	up
mmu-miR-134-3p	Sel1l	NONMMUG036594.2	down	down	up
mmu-miR-1969	Sel1l	NONMMUG036594.2	down	down	up
mmu-miR-196a-5p	Sel1l	NONMMUG036594.2	down	down	up
mmu-miR-3072-3p	Sel1l	NONMMUG036594.2	down	down	up
mmu-miR-326-5p	Sel1l	NONMMUG036594.2	down	down	up
mmu-miR-376a-3p	Sel1l	NONMMUG036594.2	down	down	up
mmu-miR-376a-5p	Sel1l	NONMMUG036594.2	down	down	up
mmu-miR-3963	Sel1l	NONMMUG036594.2	down	down	up
mmu-miR-412-5p	Sel1l	NONMMUG036594.2	down	down	up
mmu-miR-483-3p	Sel1l	NONMMUG036594.2	down	down	up
mmu-miR-677-5p	Sel1l	NONMMUG036594.2	down	down	up
mmu-miR-6947-5p	Sel1l	NONMMUG036594.2	down	down	up
mmu-miR-701-3p	Sel1l	NONMMUG036594.2	down	down	up
mmu-miR-7b-5p	Sel1l	NONMMUG036594.2	down	down	up
mmu-miR-879-3p	Sel1l	NONMMUG036594.2	down	down	up
mmu-miR-103-2-5p	Stap1	NONMMUG014666.2	down	down	up
mmu-miR-1193-3p	Stap1	NONMMUG014666.2	down	down	up
mmu-miR-134-3p	Stap1	NONMMUG014666.2	down	down	up
mmu-miR-3072-3p	Stap1	NONMMUG014666.2	down	down	up
mmu-miR-376a-3p	Stap1	NONMMUG014666.2	down	down	up
mmu-miR-376a-5p	Stap1	NONMMUG014666.2	down	down	up
mmu-miR-377-5p	Stap1	NONMMUG014666.2	down	down	up
mmu-miR-412-5p	Stap1	NONMMUG014666.2	down	down	up
mmu-miR-483-3p	Stap1	NONMMUG014666.2	down	down	up
mmu-miR-677-5p	Stap1	NONMMUG014666.2	down	down	up
mmu-miR-7240-5p	Stap1	NONMMUG014666.2	down	down	up
mmu-miR-7b-5p	Stap1	NONMMUG014666.2	down	down	up
mmu-miR-879-3p	Stap1	NONMMUG014666.2	down	down	up
mmu-miR-103-2-5p	Hyls1	NONMMUG044362.2	down	down	up
mmu-miR-1193-3p	Hyls1	NONMMUG044362.2	down	down	up
mmu-miR-134-3p	Hyls1	NONMMUG044362.2	down	down	up
mmu-miR-1969	Hyls1	NONMMUG044362.2	down	down	up
mmu-miR-196a-5p	Hyls1	NONMMUG044362.2	down	down	up
mmu-miR-3072-3p	Hyls1	NONMMUG044362.2	down	down	up
mmu-miR-376a-3p	Hyls1	NONMMUG044362.2	down	down	up
mmu-miR-376a-5p	Hyls1	NONMMUG044362.2	down	down	up
mmu-miR-377-5p	Hyls1	NONMMUG044362.2	down	down	up
mmu-miR-412-5p	Hyls1	NONMMUG044362.2	down	down	up
mmu-miR-483-3p	Hyls1	NONMMUG044362.2	down	down	up
mmu-miR-677-5p	Hyls1	NONMMUG044362.2	down	down	up
mmu-miR-7240-5p	Hyls1	NONMMUG044362.2	down	down	up
mmu-miR-7b-5p	Hyls1	NONMMUG044362.2	down	down	up
mmu-miR-879-3p	Hyls1	NONMMUG044362.2	down	down	up
mmu-miR-1199-5p	Eif2s3y	NONMMUG027420.2	up	up	down
mmu-miR-12191-3p	Eif2s3y	NONMMUG027420.2	up	up	down
mmu-miR-129-2-3p	Eif2s3y	NONMMUG027420.2	up	up	down
mmu-miR-129-5p	Eif2s3y	NONMMUG027420.2	up	up	down
mmu-miR-1298-5p	Eif2s3y	NONMMUG027420.2	up	up	down
mmu-miR-146a-3p	Eif2s3y	NONMMUG027420.2	up	up	down
mmu-miR-1912-3p	Eif2s3y	NONMMUG027420.2	up	up	down
mmu-miR-201-5p	Eif2s3y	NONMMUG027420.2	up	up	down
mmu-miR-204-3p	Eif2s3y	NONMMUG027420.2	up	up	down
mmu-miR-384-3p	Eif2s3y	NONMMUG027420.2	up	up	down
mmu-miR-448-3p	Eif2s3y	NONMMUG027420.2	up	up	down
mmu-miR-449a-3p	Eif2s3y	NONMMUG027420.2	up	up	down
mmu-miR-449c-5p	Eif2s3y	NONMMUG027420.2	up	up	down
mmu-miR-465b-5p	Eif2s3y	NONMMUG027420.2	up	up	down
mmu-miR-489-3p	Eif2s3y	NONMMUG027420.2	up	up	down
mmu-miR-497a-3p	Eif2s3y	NONMMUG027420.2	up	up	down
mmu-miR-5103	Eif2s3y	NONMMUG027420.2	up	up	down
mmu-miR-653-3p	Eif2s3y	NONMMUG027420.2	up	up	down
mmu-miR-653-5p	Eif2s3y	NONMMUG027420.2	up	up	down
mmu-miR-7063-3p	Eif2s3y	NONMMUG027420.2	up	up	down
mmu-miR-7661-5p	Eif2s3y	NONMMUG027420.2	up	up	down
mmu-miR-7667-5p	Eif2s3y	NONMMUG027420.2	up	up	down
mmu-miR-871-3p	Eif2s3y	NONMMUG027420.2	up	up	down
mmu-miR-881-3p	Eif2s3y	NONMMUG027420.2	up	up	down
mmu-miR-103-2-5p	Plekha1	NONMMUG001420.2	down	down	up
mmu-miR-1193-3p	Plekha1	NONMMUG001420.2	down	down	up
mmu-miR-134-3p	Plekha1	NONMMUG001420.2	down	down	up
mmu-miR-1969	Plekha1	NONMMUG001420.2	down	down	up
mmu-miR-196a-5p	Plekha1	NONMMUG001420.2	down	down	up
mmu-miR-3072-3p	Plekha1	NONMMUG001420.2	down	down	up
mmu-miR-376a-3p	Plekha1	NONMMUG001420.2	down	down	up
mmu-miR-376a-5p	Plekha1	NONMMUG001420.2	down	down	up
mmu-miR-377-5p	Plekha1	NONMMUG001420.2	down	down	up
mmu-miR-412-5p	Plekha1	NONMMUG001420.2	down	down	up
mmu-miR-483-3p	Plekha1	NONMMUG001420.2	down	down	up
mmu-miR-677-5p	Plekha1	NONMMUG001420.2	down	down	up
mmu-miR-7240-5p	Plekha1	NONMMUG001420.2	down	down	up
mmu-miR-7b-5p	Plekha1	NONMMUG001420.2	down	down	up
mmu-miR-879-3p	Plekha1	NONMMUG001420.2	down	down	up
mmu-miR-1199-5p	Galnt15	NONMMUG025014.2	up	up	down
mmu-miR-129-5p	Galnt15	NONMMUG025014.2	up	up	down
mmu-miR-1298-5p	Galnt15	NONMMUG025014.2	up	up	down
mmu-miR-204-3p	Galnt15	NONMMUG025014.2	up	up	down
mmu-miR-384-3p	Galnt15	NONMMUG025014.2	up	up	down
mmu-miR-449a-3p	Galnt15	NONMMUG025014.2	up	up	down
mmu-miR-5103	Galnt15	NONMMUG025014.2	up	up	down
mmu-miR-653-5p	Galnt15	NONMMUG025014.2	up	up	down
mmu-miR-871-3p	Galnt15	NONMMUG025014.2	up	up	down
mmu-miR-881-3p	Galnt15	NONMMUG025014.2	up	up	down
mmu-miR-1193-3p	Fam57a	NONMMUG035066.2	down	down	up
mmu-miR-1969	Fam57a	NONMMUG035066.2	down	down	up
mmu-miR-196a-1-3p	Fam57a	NONMMUG035066.2	down	down	up
mmu-miR-196a-5p	Fam57a	NONMMUG035066.2	down	down	up
mmu-miR-3072-3p	Fam57a	NONMMUG035066.2	down	down	up
mmu-miR-376a-5p	Fam57a	NONMMUG035066.2	down	down	up
mmu-miR-376c-5p	Fam57a	NONMMUG035066.2	down	down	up
mmu-miR-483-3p	Fam57a	NONMMUG035066.2	down	down	up
mmu-miR-677-5p	Fam57a	NONMMUG035066.2	down	down	up
mmu-miR-6950-3p	Fam57a	NONMMUG035066.2	down	down	up
mmu-miR-7240-5p	Fam57a	NONMMUG035066.2	down	down	up
mmu-miR-103-2-5p	Ephb3	NONMMUG022225.2	down	down	up
mmu-miR-1193-3p	Ephb3	NONMMUG022225.2	down	down	up
mmu-miR-134-3p	Ephb3	NONMMUG022225.2	down	down	up
mmu-miR-1969	Ephb3	NONMMUG022225.2	down	down	up
mmu-miR-196a-5p	Ephb3	NONMMUG022225.2	down	down	up
mmu-miR-3072-3p	Ephb3	NONMMUG022225.2	down	down	up
mmu-miR-376a-3p	Ephb3	NONMMUG022225.2	down	down	up
mmu-miR-376a-5p	Ephb3	NONMMUG022225.2	down	down	up
mmu-miR-377-5p	Ephb3	NONMMUG022225.2	down	down	up
mmu-miR-412-5p	Ephb3	NONMMUG022225.2	down	down	up
mmu-miR-483-3p	Ephb3	NONMMUG022225.2	down	down	up
mmu-miR-677-5p	Ephb3	NONMMUG022225.2	down	down	up
mmu-miR-6947-5p	Ephb3	NONMMUG022225.2	down	down	up
mmu-miR-701-3p	Ephb3	NONMMUG022225.2	down	down	up
mmu-miR-7240-5p	Ephb3	NONMMUG022225.2	down	down	up
mmu-miR-7b-5p	Ephb3	NONMMUG022225.2	down	down	up
mmu-miR-879-3p	Ephb3	NONMMUG022225.2	down	down	up
mmu-miR-129-5p	Kdm5d	NONMMUG008449.2	up	up	down
mmu-miR-384-3p	Kdm5d	NONMMUG008449.2	up	up	down
mmu-miR-449a-3p	Kdm5d	NONMMUG008449.2	up	up	down
mmu-miR-5103	Kdm5d	NONMMUG008449.2	up	up	down
mmu-miR-1199-5p	Kdm5d	NONMMUG025014.2	up	up	down
mmu-miR-129-5p	Kdm5d	NONMMUG025014.2	up	up	down
mmu-miR-204-3p	Kdm5d	NONMMUG025014.2	up	up	down
mmu-miR-384-3p	Kdm5d	NONMMUG025014.2	up	up	down
mmu-miR-449a-3p	Kdm5d	NONMMUG025014.2	up	up	down
mmu-miR-5103	Kdm5d	NONMMUG025014.2	up	up	down
mmu-miR-653-5p	Kdm5d	NONMMUG025014.2	up	up	down
mmu-miR-881-3p	Kdm5d	NONMMUG025014.2	up	up	down
mmu-miR-129-5p	Kdm5d	NONMMUG045603.2	up	up	down
mmu-miR-204-3p	Kdm5d	NONMMUG045603.2	up	up	down
mmu-miR-384-3p	Kdm5d	NONMMUG045603.2	up	up	down
mmu-miR-449a-3p	Kdm5d	NONMMUG045603.2	up	up	down
mmu-miR-5103	Kdm5d	NONMMUG045603.2	up	up	down
mmu-miR-653-5p	Kdm5d	NONMMUG045603.2	up	up	down
mmu-miR-881-3p	Kdm5d	NONMMUG045603.2	up	up	down
mmu-miR-129-5p	Kdm5d	NONMMUG066594.1	up	up	down
mmu-miR-384-3p	Kdm5d	NONMMUG066594.1	up	up	down
mmu-miR-5103	Kdm5d	NONMMUG066594.1	up	up	down
mmu-miR-103-2-5p	Top2a	NONMMUG022225.2	down	down	up
mmu-miR-1193-3p	Top2a	NONMMUG022225.2	down	down	up
mmu-miR-134-3p	Top2a	NONMMUG022225.2	down	down	up
mmu-miR-1969	Top2a	NONMMUG022225.2	down	down	up
mmu-miR-196a-5p	Top2a	NONMMUG022225.2	down	down	up
mmu-miR-3072-3p	Top2a	NONMMUG022225.2	down	down	up
mmu-miR-376a-3p	Top2a	NONMMUG022225.2	down	down	up
mmu-miR-376a-5p	Top2a	NONMMUG022225.2	down	down	up
mmu-miR-377-5p	Top2a	NONMMUG022225.2	down	down	up
mmu-miR-412-5p	Top2a	NONMMUG022225.2	down	down	up
mmu-miR-483-3p	Top2a	NONMMUG022225.2	down	down	up
mmu-miR-677-5p	Top2a	NONMMUG022225.2	down	down	up
mmu-miR-6947-5p	Top2a	NONMMUG022225.2	down	down	up
mmu-miR-701-3p	Top2a	NONMMUG022225.2	down	down	up
mmu-miR-7240-5p	Top2a	NONMMUG022225.2	down	down	up
mmu-miR-7b-5p	Top2a	NONMMUG022225.2	down	down	up
mmu-miR-879-3p	Top2a	NONMMUG022225.2	down	down	up
mmu-miR-1193-3p	Ybx3	NONMMUG009055.3	down	down	up
mmu-miR-134-3p	Ybx3	NONMMUG009055.3	down	down	up
mmu-miR-1969	Ybx3	NONMMUG009055.3	down	down	up
mmu-miR-196a-5p	Ybx3	NONMMUG009055.3	down	down	up
mmu-miR-3072-3p	Ybx3	NONMMUG009055.3	down	down	up
mmu-miR-412-5p	Ybx3	NONMMUG009055.3	down	down	up
mmu-miR-483-3p	Ybx3	NONMMUG009055.3	down	down	up
mmu-miR-677-5p	Ybx3	NONMMUG009055.3	down	down	up
mmu-miR-701-3p	Ybx3	NONMMUG009055.3	down	down	up
mmu-miR-7240-5p	Ybx3	NONMMUG009055.3	down	down	up
mmu-miR-7b-5p	Ybx3	NONMMUG009055.3	down	down	up
mmu-miR-879-3p	Ybx3	NONMMUG009055.3	down	down	up
mmu-miR-1193-3p	Stk36	NONMMUG009055.3	down	down	up
mmu-miR-134-3p	Stk36	NONMMUG009055.3	down	down	up
mmu-miR-1969	Stk36	NONMMUG009055.3	down	down	up
mmu-miR-196a-5p	Stk36	NONMMUG009055.3	down	down	up
mmu-miR-3072-3p	Stk36	NONMMUG009055.3	down	down	up
mmu-miR-412-5p	Stk36	NONMMUG009055.3	down	down	up
mmu-miR-483-3p	Stk36	NONMMUG009055.3	down	down	up
mmu-miR-677-5p	Stk36	NONMMUG009055.3	down	down	up
mmu-miR-701-3p	Stk36	NONMMUG009055.3	down	down	up
mmu-miR-7240-5p	Stk36	NONMMUG009055.3	down	down	up
mmu-miR-7b-5p	Stk36	NONMMUG009055.3	down	down	up
mmu-miR-879-3p	Stk36	NONMMUG009055.3	down	down	up
mmu-miR-1193-3p	Pimreg	NONMMUG002566.2	down	down	up
mmu-miR-134-3p	Pimreg	NONMMUG002566.2	down	down	up
mmu-miR-1969	Pimreg	NONMMUG002566.2	down	down	up
mmu-miR-196a-5p	Pimreg	NONMMUG002566.2	down	down	up
mmu-miR-3072-3p	Pimreg	NONMMUG002566.2	down	down	up
mmu-miR-376a-3p	Pimreg	NONMMUG002566.2	down	down	up
mmu-miR-376a-5p	Pimreg	NONMMUG002566.2	down	down	up
mmu-miR-377-5p	Pimreg	NONMMUG002566.2	down	down	up
mmu-miR-412-5p	Pimreg	NONMMUG002566.2	down	down	up
mmu-miR-483-3p	Pimreg	NONMMUG002566.2	down	down	up
mmu-miR-677-5p	Pimreg	NONMMUG002566.2	down	down	up
mmu-miR-6947-5p	Pimreg	NONMMUG002566.2	down	down	up
mmu-miR-701-3p	Pimreg	NONMMUG002566.2	down	down	up
mmu-miR-7240-5p	Pimreg	NONMMUG002566.2	down	down	up
mmu-miR-7b-5p	Pimreg	NONMMUG002566.2	down	down	up
mmu-miR-879-3p	Pimreg	NONMMUG002566.2	down	down	up
mmu-miR-103-2-5p	Pimreg	NONMMUG061335.1	down	down	up
mmu-miR-1193-3p	Pimreg	NONMMUG061335.1	down	down	up
mmu-miR-134-3p	Pimreg	NONMMUG061335.1	down	down	up
mmu-miR-1969	Pimreg	NONMMUG061335.1	down	down	up
mmu-miR-196a-5p	Pimreg	NONMMUG061335.1	down	down	up
mmu-miR-3072-3p	Pimreg	NONMMUG061335.1	down	down	up
mmu-miR-376a-3p	Pimreg	NONMMUG061335.1	down	down	up
mmu-miR-376a-5p	Pimreg	NONMMUG061335.1	down	down	up
mmu-miR-377-5p	Pimreg	NONMMUG061335.1	down	down	up
mmu-miR-412-5p	Pimreg	NONMMUG061335.1	down	down	up
mmu-miR-483-3p	Pimreg	NONMMUG061335.1	down	down	up
mmu-miR-677-5p	Pimreg	NONMMUG061335.1	down	down	up
mmu-miR-6947-5p	Pimreg	NONMMUG061335.1	down	down	up
mmu-miR-701-3p	Pimreg	NONMMUG061335.1	down	down	up
mmu-miR-7240-5p	Pimreg	NONMMUG061335.1	down	down	up
mmu-miR-7b-5p	Pimreg	NONMMUG061335.1	down	down	up
mmu-miR-879-3p	Pimreg	NONMMUG061335.1	down	down	up
mmu-miR-129-5p	Nrxn2	NONMMUG036054.2	up	up	down
mmu-miR-5103	Nrxn2	NONMMUG036054.2	up	up	down
mmu-miR-129-5p	Nrxn2	NONMMUG017114.2	up	up	down
mmu-miR-5103	Nrxn2	NONMMUG017114.2	up	up	down
mmu-miR-129-5p	Syf2	NONMMUG008449.2	up	up	down
mmu-miR-384-3p	Syf2	NONMMUG008449.2	up	up	down
mmu-miR-449a-3p	Syf2	NONMMUG008449.2	up	up	down
mmu-miR-5103	Syf2	NONMMUG008449.2	up	up	down
mmu-miR-103-2-5p	Blnk	NONMMUG005645.2	down	down	up
mmu-miR-1193-3p	Blnk	NONMMUG005645.2	down	down	up
mmu-miR-134-3p	Blnk	NONMMUG005645.2	down	down	up
mmu-miR-1969	Blnk	NONMMUG005645.2	down	down	up
mmu-miR-196a-5p	Blnk	NONMMUG005645.2	down	down	up
mmu-miR-3072-3p	Blnk	NONMMUG005645.2	down	down	up
mmu-miR-376a-3p	Blnk	NONMMUG005645.2	down	down	up
mmu-miR-376a-5p	Blnk	NONMMUG005645.2	down	down	up
mmu-miR-412-5p	Blnk	NONMMUG005645.2	down	down	up
mmu-miR-483-3p	Blnk	NONMMUG005645.2	down	down	up
mmu-miR-677-5p	Blnk	NONMMUG005645.2	down	down	up
mmu-miR-701-3p	Blnk	NONMMUG005645.2	down	down	up
mmu-miR-7240-5p	Blnk	NONMMUG005645.2	down	down	up
mmu-miR-7b-5p	Blnk	NONMMUG005645.2	down	down	up
mmu-miR-879-3p	Blnk	NONMMUG005645.2	down	down	up
mmu-miR-103-2-5p	Blnk	NONMMUG072266.1	down	down	up
mmu-miR-1193-3p	Blnk	NONMMUG072266.1	down	down	up
mmu-miR-134-3p	Blnk	NONMMUG072266.1	down	down	up
mmu-miR-1969	Blnk	NONMMUG072266.1	down	down	up
mmu-miR-196a-5p	Blnk	NONMMUG072266.1	down	down	up
mmu-miR-3072-3p	Blnk	NONMMUG072266.1	down	down	up
mmu-miR-376a-3p	Blnk	NONMMUG072266.1	down	down	up
mmu-miR-376a-5p	Blnk	NONMMUG072266.1	down	down	up
mmu-miR-412-5p	Blnk	NONMMUG072266.1	down	down	up
mmu-miR-483-3p	Blnk	NONMMUG072266.1	down	down	up
mmu-miR-677-5p	Blnk	NONMMUG072266.1	down	down	up
mmu-miR-6947-5p	Blnk	NONMMUG072266.1	down	down	up
mmu-miR-701-3p	Blnk	NONMMUG072266.1	down	down	up
mmu-miR-7240-5p	Blnk	NONMMUG072266.1	down	down	up
mmu-miR-7b-5p	Blnk	NONMMUG072266.1	down	down	up
mmu-miR-879-3p	Blnk	NONMMUG072266.1	down	down	up
mmu-miR-129-5p	Flna	NONMMUG008449.2	up	up	down
mmu-miR-384-3p	Flna	NONMMUG008449.2	up	up	down
mmu-miR-449a-3p	Flna	NONMMUG008449.2	up	up	down
mmu-miR-5103	Flna	NONMMUG008449.2	up	up	down
mmu-miR-1193-3p	Cdkn2c	ENSMUSG00000075010	down	down	up
mmu-miR-196a-5p	Cdkn2c	ENSMUSG00000075010	down	down	up
mmu-miR-3072-3p	Cdkn2c	ENSMUSG00000075010	down	down	up
mmu-miR-412-5p	Cdkn2c	ENSMUSG00000075010	down	down	up
mmu-miR-483-3p	Cdkn2c	ENSMUSG00000075010	down	down	up
mmu-miR-677-5p	Cdkn2c	ENSMUSG00000075010	down	down	up
mmu-miR-701-3p	Cdkn2c	ENSMUSG00000075010	down	down	up
mmu-miR-7240-5p	Cdkn2c	ENSMUSG00000075010	down	down	up
mmu-miR-1199-5p	Tsku	NONMMUG025014.2	up	up	down
mmu-miR-129-5p	Tsku	NONMMUG025014.2	up	up	down
mmu-miR-1298-5p	Tsku	NONMMUG025014.2	up	up	down
mmu-miR-204-3p	Tsku	NONMMUG025014.2	up	up	down
mmu-miR-384-3p	Tsku	NONMMUG025014.2	up	up	down
mmu-miR-449a-3p	Tsku	NONMMUG025014.2	up	up	down
mmu-miR-5103	Tsku	NONMMUG025014.2	up	up	down
mmu-miR-653-5p	Tsku	NONMMUG025014.2	up	up	down
mmu-miR-871-3p	Tsku	NONMMUG025014.2	up	up	down
mmu-miR-881-3p	Tsku	NONMMUG025014.2	up	up	down
mmu-miR-103-2-5p	F2rl3	NONMMUG005645.2	down	down	up
mmu-miR-1193-3p	F2rl3	NONMMUG005645.2	down	down	up
mmu-miR-134-3p	F2rl3	NONMMUG005645.2	down	down	up
mmu-miR-1969	F2rl3	NONMMUG005645.2	down	down	up
mmu-miR-196a-5p	F2rl3	NONMMUG005645.2	down	down	up
mmu-miR-3072-3p	F2rl3	NONMMUG005645.2	down	down	up
mmu-miR-376a-3p	F2rl3	NONMMUG005645.2	down	down	up
mmu-miR-376a-5p	F2rl3	NONMMUG005645.2	down	down	up
mmu-miR-412-5p	F2rl3	NONMMUG005645.2	down	down	up
mmu-miR-483-3p	F2rl3	NONMMUG005645.2	down	down	up
mmu-miR-677-5p	F2rl3	NONMMUG005645.2	down	down	up
mmu-miR-701-3p	F2rl3	NONMMUG005645.2	down	down	up
mmu-miR-7240-5p	F2rl3	NONMMUG005645.2	down	down	up
mmu-miR-7b-5p	F2rl3	NONMMUG005645.2	down	down	up
mmu-miR-879-3p	F2rl3	NONMMUG005645.2	down	down	up
mmu-miR-103-2-5p	Ighv1-53	NONMMUG004595.2	down	down	up
mmu-miR-1193-3p	Ighv1-53	NONMMUG004595.2	down	down	up
mmu-miR-134-3p	Ighv1-53	NONMMUG004595.2	down	down	up
mmu-miR-3072-3p	Ighv1-53	NONMMUG004595.2	down	down	up
mmu-miR-376a-3p	Ighv1-53	NONMMUG004595.2	down	down	up
mmu-miR-376a-5p	Ighv1-53	NONMMUG004595.2	down	down	up
mmu-miR-377-5p	Ighv1-53	NONMMUG004595.2	down	down	up
mmu-miR-412-5p	Ighv1-53	NONMMUG004595.2	down	down	up
mmu-miR-483-3p	Ighv1-53	NONMMUG004595.2	down	down	up
mmu-miR-677-5p	Ighv1-53	NONMMUG004595.2	down	down	up
mmu-miR-7b-5p	Ighv1-53	NONMMUG004595.2	down	down	up
mmu-miR-879-3p	Ighv1-53	NONMMUG004595.2	down	down	up
mmu-miR-1193-3p	Dagla	NONMMUG046321.2	down	down	up
mmu-miR-3072-3p	Dagla	NONMMUG046321.2	down	down	up
mmu-miR-376a-3p	Dagla	NONMMUG046321.2	down	down	up
mmu-miR-376a-5p	Dagla	NONMMUG046321.2	down	down	up
mmu-miR-377-5p	Dagla	NONMMUG046321.2	down	down	up
mmu-miR-677-5p	Dagla	NONMMUG046321.2	down	down	up
mmu-miR-879-3p	Dagla	NONMMUG046321.2	down	down	up
mmu-miR-103-2-5p	Mbd5	NONMMUG044362.2	down	down	up
mmu-miR-1193-3p	Mbd5	NONMMUG044362.2	down	down	up
mmu-miR-134-3p	Mbd5	NONMMUG044362.2	down	down	up
mmu-miR-1969	Mbd5	NONMMUG044362.2	down	down	up
mmu-miR-196a-5p	Mbd5	NONMMUG044362.2	down	down	up
mmu-miR-3072-3p	Mbd5	NONMMUG044362.2	down	down	up
mmu-miR-376a-3p	Mbd5	NONMMUG044362.2	down	down	up
mmu-miR-376a-5p	Mbd5	NONMMUG044362.2	down	down	up
mmu-miR-377-5p	Mbd5	NONMMUG044362.2	down	down	up
mmu-miR-412-5p	Mbd5	NONMMUG044362.2	down	down	up
mmu-miR-483-3p	Mbd5	NONMMUG044362.2	down	down	up
mmu-miR-677-5p	Mbd5	NONMMUG044362.2	down	down	up
mmu-miR-7240-5p	Mbd5	NONMMUG044362.2	down	down	up
mmu-miR-7b-5p	Mbd5	NONMMUG044362.2	down	down	up
mmu-miR-879-3p	Mbd5	NONMMUG044362.2	down	down	up
mmu-miR-1193-3p	Kif4	NONMMUG051012.2	down	down	up
mmu-miR-134-3p	Kif4	NONMMUG051012.2	down	down	up
mmu-miR-1969	Kif4	NONMMUG051012.2	down	down	up
mmu-miR-196a-5p	Kif4	NONMMUG051012.2	down	down	up
mmu-miR-3072-3p	Kif4	NONMMUG051012.2	down	down	up
mmu-miR-376a-3p	Kif4	NONMMUG051012.2	down	down	up
mmu-miR-376a-5p	Kif4	NONMMUG051012.2	down	down	up
mmu-miR-377-5p	Kif4	NONMMUG051012.2	down	down	up
mmu-miR-412-5p	Kif4	NONMMUG051012.2	down	down	up
mmu-miR-483-3p	Kif4	NONMMUG051012.2	down	down	up
mmu-miR-677-5p	Kif4	NONMMUG051012.2	down	down	up
mmu-miR-6947-5p	Kif4	NONMMUG051012.2	down	down	up
mmu-miR-701-3p	Kif4	NONMMUG051012.2	down	down	up
mmu-miR-7240-5p	Kif4	NONMMUG051012.2	down	down	up
mmu-miR-7b-5p	Kif4	NONMMUG051012.2	down	down	up
mmu-miR-879-3p	Kif4	NONMMUG051012.2	down	down	up
mmu-miR-1193-3p	Kif4	NONMMUG002566.2	down	down	up
mmu-miR-134-3p	Kif4	NONMMUG002566.2	down	down	up
mmu-miR-1969	Kif4	NONMMUG002566.2	down	down	up
mmu-miR-196a-5p	Kif4	NONMMUG002566.2	down	down	up
mmu-miR-3072-3p	Kif4	NONMMUG002566.2	down	down	up
mmu-miR-376a-3p	Kif4	NONMMUG002566.2	down	down	up
mmu-miR-376a-5p	Kif4	NONMMUG002566.2	down	down	up
mmu-miR-377-5p	Kif4	NONMMUG002566.2	down	down	up
mmu-miR-412-5p	Kif4	NONMMUG002566.2	down	down	up
mmu-miR-483-3p	Kif4	NONMMUG002566.2	down	down	up
mmu-miR-677-5p	Kif4	NONMMUG002566.2	down	down	up
mmu-miR-6947-5p	Kif4	NONMMUG002566.2	down	down	up
mmu-miR-701-3p	Kif4	NONMMUG002566.2	down	down	up
mmu-miR-7240-5p	Kif4	NONMMUG002566.2	down	down	up
mmu-miR-7b-5p	Kif4	NONMMUG002566.2	down	down	up
mmu-miR-879-3p	Kif4	NONMMUG002566.2	down	down	up
mmu-miR-1193-3p	Kif4	NONMMUG061335.1	down	down	up
mmu-miR-134-3p	Kif4	NONMMUG061335.1	down	down	up
mmu-miR-1969	Kif4	NONMMUG061335.1	down	down	up
mmu-miR-196a-5p	Kif4	NONMMUG061335.1	down	down	up
mmu-miR-3072-3p	Kif4	NONMMUG061335.1	down	down	up
mmu-miR-376a-3p	Kif4	NONMMUG061335.1	down	down	up
mmu-miR-376a-5p	Kif4	NONMMUG061335.1	down	down	up
mmu-miR-377-5p	Kif4	NONMMUG061335.1	down	down	up
mmu-miR-412-5p	Kif4	NONMMUG061335.1	down	down	up
mmu-miR-483-3p	Kif4	NONMMUG061335.1	down	down	up
mmu-miR-677-5p	Kif4	NONMMUG061335.1	down	down	up
mmu-miR-6947-5p	Kif4	NONMMUG061335.1	down	down	up
mmu-miR-701-3p	Kif4	NONMMUG061335.1	down	down	up
mmu-miR-7240-5p	Kif4	NONMMUG061335.1	down	down	up
mmu-miR-7b-5p	Kif4	NONMMUG061335.1	down	down	up
mmu-miR-879-3p	Kif4	NONMMUG061335.1	down	down	up
mmu-miR-103-2-5p	Prc1	NONMMUG008611.3	down	down	up
mmu-miR-1193-3p	Prc1	NONMMUG008611.3	down	down	up
mmu-miR-134-3p	Prc1	NONMMUG008611.3	down	down	up
mmu-miR-1969	Prc1	NONMMUG008611.3	down	down	up
mmu-miR-196a-5p	Prc1	NONMMUG008611.3	down	down	up
mmu-miR-3072-3p	Prc1	NONMMUG008611.3	down	down	up
mmu-miR-376a-3p	Prc1	NONMMUG008611.3	down	down	up
mmu-miR-376a-5p	Prc1	NONMMUG008611.3	down	down	up
mmu-miR-412-5p	Prc1	NONMMUG008611.3	down	down	up
mmu-miR-483-3p	Prc1	NONMMUG008611.3	down	down	up
mmu-miR-677-5p	Prc1	NONMMUG008611.3	down	down	up
mmu-miR-7240-5p	Prc1	NONMMUG008611.3	down	down	up
mmu-miR-7b-5p	Prc1	NONMMUG008611.3	down	down	up
mmu-miR-879-3p	Prc1	NONMMUG008611.3	down	down	up
mmu-miR-129-5p	Mysm1	NONMMUG066594.1	up	up	down
mmu-miR-384-3p	Mysm1	NONMMUG066594.1	up	up	down
mmu-miR-5103	Mysm1	NONMMUG066594.1	up	up	down
mmu-miR-103-2-5p	Depdc1b	NONMMUG022225.2	down	down	up
mmu-miR-1193-3p	Depdc1b	NONMMUG022225.2	down	down	up
mmu-miR-134-3p	Depdc1b	NONMMUG022225.2	down	down	up
mmu-miR-1969	Depdc1b	NONMMUG022225.2	down	down	up
mmu-miR-196a-5p	Depdc1b	NONMMUG022225.2	down	down	up
mmu-miR-3072-3p	Depdc1b	NONMMUG022225.2	down	down	up
mmu-miR-376a-3p	Depdc1b	NONMMUG022225.2	down	down	up
mmu-miR-376a-5p	Depdc1b	NONMMUG022225.2	down	down	up
mmu-miR-377-5p	Depdc1b	NONMMUG022225.2	down	down	up
mmu-miR-412-5p	Depdc1b	NONMMUG022225.2	down	down	up
mmu-miR-483-3p	Depdc1b	NONMMUG022225.2	down	down	up
mmu-miR-677-5p	Depdc1b	NONMMUG022225.2	down	down	up
mmu-miR-6947-5p	Depdc1b	NONMMUG022225.2	down	down	up
mmu-miR-701-3p	Depdc1b	NONMMUG022225.2	down	down	up
mmu-miR-7240-5p	Depdc1b	NONMMUG022225.2	down	down	up
mmu-miR-7b-5p	Depdc1b	NONMMUG022225.2	down	down	up
mmu-miR-879-3p	Depdc1b	NONMMUG022225.2	down	down	up
mmu-miR-103-2-5p	Depdc1b	NONMMUG019867.3	down	down	up
mmu-miR-1193-3p	Depdc1b	NONMMUG019867.3	down	down	up
mmu-miR-134-3p	Depdc1b	NONMMUG019867.3	down	down	up
mmu-miR-1969	Depdc1b	NONMMUG019867.3	down	down	up
mmu-miR-196a-5p	Depdc1b	NONMMUG019867.3	down	down	up
mmu-miR-3072-3p	Depdc1b	NONMMUG019867.3	down	down	up
mmu-miR-376a-3p	Depdc1b	NONMMUG019867.3	down	down	up
mmu-miR-376a-5p	Depdc1b	NONMMUG019867.3	down	down	up
mmu-miR-3963	Depdc1b	NONMMUG019867.3	down	down	up
mmu-miR-412-5p	Depdc1b	NONMMUG019867.3	down	down	up
mmu-miR-483-3p	Depdc1b	NONMMUG019867.3	down	down	up
mmu-miR-677-5p	Depdc1b	NONMMUG019867.3	down	down	up
mmu-miR-6947-5p	Depdc1b	NONMMUG019867.3	down	down	up
mmu-miR-701-3p	Depdc1b	NONMMUG019867.3	down	down	up
mmu-miR-7240-5p	Depdc1b	NONMMUG019867.3	down	down	up
mmu-miR-7b-5p	Depdc1b	NONMMUG019867.3	down	down	up
mmu-miR-879-3p	Depdc1b	NONMMUG019867.3	down	down	up
mmu-miR-204-3p	Mtmr10	NONMMUG009411.2	up	up	down
mmu-miR-103-2-5p	Parpbp	NONMMUG022225.2	down	down	up
mmu-miR-1193-3p	Parpbp	NONMMUG022225.2	down	down	up
mmu-miR-134-3p	Parpbp	NONMMUG022225.2	down	down	up
mmu-miR-1969	Parpbp	NONMMUG022225.2	down	down	up
mmu-miR-196a-5p	Parpbp	NONMMUG022225.2	down	down	up
mmu-miR-3072-3p	Parpbp	NONMMUG022225.2	down	down	up
mmu-miR-376a-3p	Parpbp	NONMMUG022225.2	down	down	up
mmu-miR-376a-5p	Parpbp	NONMMUG022225.2	down	down	up
mmu-miR-377-5p	Parpbp	NONMMUG022225.2	down	down	up
mmu-miR-412-5p	Parpbp	NONMMUG022225.2	down	down	up
mmu-miR-483-3p	Parpbp	NONMMUG022225.2	down	down	up
mmu-miR-677-5p	Parpbp	NONMMUG022225.2	down	down	up
mmu-miR-6947-5p	Parpbp	NONMMUG022225.2	down	down	up
mmu-miR-701-3p	Parpbp	NONMMUG022225.2	down	down	up
mmu-miR-7240-5p	Parpbp	NONMMUG022225.2	down	down	up
mmu-miR-7b-5p	Parpbp	NONMMUG022225.2	down	down	up
mmu-miR-879-3p	Parpbp	NONMMUG022225.2	down	down	up
mmu-miR-1193-3p	Shprh	NONMMUG036346.2	down	down	up
mmu-miR-3072-3p	Shprh	NONMMUG036346.2	down	down	up
mmu-miR-376a-5p	Shprh	NONMMUG036346.2	down	down	up
mmu-miR-1193-3p	Depdc1a	NONMMUG009055.3	down	down	up
mmu-miR-134-3p	Depdc1a	NONMMUG009055.3	down	down	up
mmu-miR-1969	Depdc1a	NONMMUG009055.3	down	down	up
mmu-miR-196a-5p	Depdc1a	NONMMUG009055.3	down	down	up
mmu-miR-3072-3p	Depdc1a	NONMMUG009055.3	down	down	up
mmu-miR-412-5p	Depdc1a	NONMMUG009055.3	down	down	up
mmu-miR-483-3p	Depdc1a	NONMMUG009055.3	down	down	up
mmu-miR-677-5p	Depdc1a	NONMMUG009055.3	down	down	up
mmu-miR-701-3p	Depdc1a	NONMMUG009055.3	down	down	up
mmu-miR-7240-5p	Depdc1a	NONMMUG009055.3	down	down	up
mmu-miR-7b-5p	Depdc1a	NONMMUG009055.3	down	down	up
mmu-miR-879-3p	Depdc1a	NONMMUG009055.3	down	down	up
mmu-miR-1193-3p	Rrm2	NONMMUG002566.2	down	down	up
mmu-miR-134-3p	Rrm2	NONMMUG002566.2	down	down	up
mmu-miR-1969	Rrm2	NONMMUG002566.2	down	down	up
mmu-miR-196a-5p	Rrm2	NONMMUG002566.2	down	down	up
mmu-miR-3072-3p	Rrm2	NONMMUG002566.2	down	down	up
mmu-miR-376a-3p	Rrm2	NONMMUG002566.2	down	down	up
mmu-miR-376a-5p	Rrm2	NONMMUG002566.2	down	down	up
mmu-miR-377-5p	Rrm2	NONMMUG002566.2	down	down	up
mmu-miR-412-5p	Rrm2	NONMMUG002566.2	down	down	up
mmu-miR-483-3p	Rrm2	NONMMUG002566.2	down	down	up
mmu-miR-677-5p	Rrm2	NONMMUG002566.2	down	down	up
mmu-miR-6947-5p	Rrm2	NONMMUG002566.2	down	down	up
mmu-miR-701-3p	Rrm2	NONMMUG002566.2	down	down	up
mmu-miR-7240-5p	Rrm2	NONMMUG002566.2	down	down	up
mmu-miR-7b-5p	Rrm2	NONMMUG002566.2	down	down	up
mmu-miR-879-3p	Rrm2	NONMMUG002566.2	down	down	up
mmu-miR-1193-3p	Rrm2	NONMMUG061335.1	down	down	up
mmu-miR-134-3p	Rrm2	NONMMUG061335.1	down	down	up
mmu-miR-1969	Rrm2	NONMMUG061335.1	down	down	up
mmu-miR-196a-5p	Rrm2	NONMMUG061335.1	down	down	up
mmu-miR-3072-3p	Rrm2	NONMMUG061335.1	down	down	up
mmu-miR-376a-3p	Rrm2	NONMMUG061335.1	down	down	up
mmu-miR-376a-5p	Rrm2	NONMMUG061335.1	down	down	up
mmu-miR-377-5p	Rrm2	NONMMUG061335.1	down	down	up
mmu-miR-412-5p	Rrm2	NONMMUG061335.1	down	down	up
mmu-miR-483-3p	Rrm2	NONMMUG061335.1	down	down	up
mmu-miR-677-5p	Rrm2	NONMMUG061335.1	down	down	up
mmu-miR-6947-5p	Rrm2	NONMMUG061335.1	down	down	up
mmu-miR-701-3p	Rrm2	NONMMUG061335.1	down	down	up
mmu-miR-7240-5p	Rrm2	NONMMUG061335.1	down	down	up
mmu-miR-7b-5p	Rrm2	NONMMUG061335.1	down	down	up
mmu-miR-879-3p	Rrm2	NONMMUG061335.1	down	down	up
mmu-miR-129-5p	Taf2	NONMMUG002670.2	up	up	down
mmu-miR-204-3p	Taf2	NONMMUG002670.2	up	up	down
mmu-miR-129-5p	Tatdn2	NONMMUG045603.2	up	up	down
mmu-miR-204-3p	Tatdn2	NONMMUG045603.2	up	up	down
mmu-miR-384-3p	Tatdn2	NONMMUG045603.2	up	up	down
mmu-miR-449a-3p	Tatdn2	NONMMUG045603.2	up	up	down
mmu-miR-5103	Tatdn2	NONMMUG045603.2	up	up	down
mmu-miR-653-5p	Tatdn2	NONMMUG045603.2	up	up	down
mmu-miR-7679-3p	Tatdn2	NONMMUG045603.2	up	up	down
mmu-miR-871-3p	Tatdn2	NONMMUG045603.2	up	up	down
mmu-miR-881-3p	Tatdn2	NONMMUG045603.2	up	up	down
mmu-miR-129-5p	Tatdn2	NONMMUG087654.1	up	up	down
mmu-miR-204-3p	Tatdn2	NONMMUG087654.1	up	up	down
mmu-miR-384-3p	Tatdn2	NONMMUG087654.1	up	up	down
mmu-miR-449a-3p	Tatdn2	NONMMUG087654.1	up	up	down
mmu-miR-489-3p	Tatdn2	NONMMUG087654.1	up	up	down
mmu-miR-5103	Tatdn2	NONMMUG087654.1	up	up	down
mmu-miR-653-3p	Tatdn2	NONMMUG087654.1	up	up	down
mmu-miR-653-5p	Tatdn2	NONMMUG087654.1	up	up	down
mmu-miR-7679-3p	Tatdn2	NONMMUG087654.1	up	up	down
mmu-miR-871-3p	Tatdn2	NONMMUG087654.1	up	up	down
mmu-miR-881-3p	Tatdn2	NONMMUG087654.1	up	up	down
mmu-miR-1193-3p	Hist1h1a	NONMMUG051012.2	down	down	up
mmu-miR-134-3p	Hist1h1a	NONMMUG051012.2	down	down	up
mmu-miR-1969	Hist1h1a	NONMMUG051012.2	down	down	up
mmu-miR-196a-5p	Hist1h1a	NONMMUG051012.2	down	down	up
mmu-miR-3072-3p	Hist1h1a	NONMMUG051012.2	down	down	up
mmu-miR-376a-3p	Hist1h1a	NONMMUG051012.2	down	down	up
mmu-miR-376a-5p	Hist1h1a	NONMMUG051012.2	down	down	up
mmu-miR-377-5p	Hist1h1a	NONMMUG051012.2	down	down	up
mmu-miR-3963	Hist1h1a	NONMMUG051012.2	down	down	up
mmu-miR-412-5p	Hist1h1a	NONMMUG051012.2	down	down	up
mmu-miR-483-3p	Hist1h1a	NONMMUG051012.2	down	down	up
mmu-miR-677-5p	Hist1h1a	NONMMUG051012.2	down	down	up
mmu-miR-6947-5p	Hist1h1a	NONMMUG051012.2	down	down	up
mmu-miR-701-3p	Hist1h1a	NONMMUG051012.2	down	down	up
mmu-miR-7240-5p	Hist1h1a	NONMMUG051012.2	down	down	up
mmu-miR-7b-5p	Hist1h1a	NONMMUG051012.2	down	down	up
mmu-miR-879-3p	Hist1h1a	NONMMUG051012.2	down	down	up
mmu-miR-103-2-5p	Zfp949	NONMMUG029249.2	down	down	up
mmu-miR-1193-3p	Zfp949	NONMMUG029249.2	down	down	up
mmu-miR-134-3p	Zfp949	NONMMUG029249.2	down	down	up
mmu-miR-1969	Zfp949	NONMMUG029249.2	down	down	up
mmu-miR-196a-5p	Zfp949	NONMMUG029249.2	down	down	up
mmu-miR-3072-3p	Zfp949	NONMMUG029249.2	down	down	up
mmu-miR-376a-3p	Zfp949	NONMMUG029249.2	down	down	up
mmu-miR-376a-5p	Zfp949	NONMMUG029249.2	down	down	up
mmu-miR-377-5p	Zfp949	NONMMUG029249.2	down	down	up
mmu-miR-412-5p	Zfp949	NONMMUG029249.2	down	down	up
mmu-miR-483-3p	Zfp949	NONMMUG029249.2	down	down	up
mmu-miR-677-5p	Zfp949	NONMMUG029249.2	down	down	up
mmu-miR-6947-5p	Zfp949	NONMMUG029249.2	down	down	up
mmu-miR-701-3p	Zfp949	NONMMUG029249.2	down	down	up
mmu-miR-7240-5p	Zfp949	NONMMUG029249.2	down	down	up
mmu-miR-7b-5p	Zfp949	NONMMUG029249.2	down	down	up
mmu-miR-879-3p	Zfp949	NONMMUG029249.2	down	down	up
mmu-miR-103-2-5p	Zfp949	NONMMUG022225.2	down	down	up
mmu-miR-1193-3p	Zfp949	NONMMUG022225.2	down	down	up
mmu-miR-134-3p	Zfp949	NONMMUG022225.2	down	down	up
mmu-miR-1969	Zfp949	NONMMUG022225.2	down	down	up
mmu-miR-196a-5p	Zfp949	NONMMUG022225.2	down	down	up
mmu-miR-3072-3p	Zfp949	NONMMUG022225.2	down	down	up
mmu-miR-376a-3p	Zfp949	NONMMUG022225.2	down	down	up
mmu-miR-376a-5p	Zfp949	NONMMUG022225.2	down	down	up
mmu-miR-377-5p	Zfp949	NONMMUG022225.2	down	down	up
mmu-miR-412-5p	Zfp949	NONMMUG022225.2	down	down	up
mmu-miR-483-3p	Zfp949	NONMMUG022225.2	down	down	up
mmu-miR-677-5p	Zfp949	NONMMUG022225.2	down	down	up
mmu-miR-6947-5p	Zfp949	NONMMUG022225.2	down	down	up
mmu-miR-701-3p	Zfp949	NONMMUG022225.2	down	down	up
mmu-miR-7240-5p	Zfp949	NONMMUG022225.2	down	down	up
mmu-miR-7b-5p	Zfp949	NONMMUG022225.2	down	down	up
mmu-miR-879-3p	Zfp949	NONMMUG022225.2	down	down	up
mmu-miR-129-5p	Ndufb7	NONMMUG008449.2	up	up	down
mmu-miR-384-3p	Ndufb7	NONMMUG008449.2	up	up	down
mmu-miR-449a-3p	Ndufb7	NONMMUG008449.2	up	up	down
mmu-miR-5103	Ndufb7	NONMMUG008449.2	up	up	down
mmu-miR-196a-5p	Trpc4ap	ENSMUSG00000075010	down	down	up
mmu-miR-483-3p	Trpc4ap	ENSMUSG00000075010	down	down	up
mmu-miR-677-5p	Trpc4ap	ENSMUSG00000075010	down	down	up
mmu-miR-701-3p	Trpc4ap	ENSMUSG00000075010	down	down	up
mmu-miR-7240-5p	Trpc4ap	ENSMUSG00000075010	down	down	up
mmu-miR-1193-3p	Bcl11a	NONMMUG002566.2	down	down	up
mmu-miR-134-3p	Bcl11a	NONMMUG002566.2	down	down	up
mmu-miR-1969	Bcl11a	NONMMUG002566.2	down	down	up
mmu-miR-196a-5p	Bcl11a	NONMMUG002566.2	down	down	up
mmu-miR-3072-3p	Bcl11a	NONMMUG002566.2	down	down	up
mmu-miR-376a-3p	Bcl11a	NONMMUG002566.2	down	down	up
mmu-miR-376a-5p	Bcl11a	NONMMUG002566.2	down	down	up
mmu-miR-412-5p	Bcl11a	NONMMUG002566.2	down	down	up
mmu-miR-483-3p	Bcl11a	NONMMUG002566.2	down	down	up
mmu-miR-677-5p	Bcl11a	NONMMUG002566.2	down	down	up
mmu-miR-6947-5p	Bcl11a	NONMMUG002566.2	down	down	up
mmu-miR-701-3p	Bcl11a	NONMMUG002566.2	down	down	up
mmu-miR-7b-5p	Bcl11a	NONMMUG002566.2	down	down	up
mmu-miR-879-3p	Bcl11a	NONMMUG002566.2	down	down	up
mmu-miR-1193-3p	Bcl11a	NONMMUG061335.1	down	down	up
mmu-miR-134-3p	Bcl11a	NONMMUG061335.1	down	down	up
mmu-miR-1969	Bcl11a	NONMMUG061335.1	down	down	up
mmu-miR-196a-5p	Bcl11a	NONMMUG061335.1	down	down	up
mmu-miR-3072-3p	Bcl11a	NONMMUG061335.1	down	down	up
mmu-miR-376a-3p	Bcl11a	NONMMUG061335.1	down	down	up
mmu-miR-376a-5p	Bcl11a	NONMMUG061335.1	down	down	up
mmu-miR-412-5p	Bcl11a	NONMMUG061335.1	down	down	up
mmu-miR-483-3p	Bcl11a	NONMMUG061335.1	down	down	up
mmu-miR-677-5p	Bcl11a	NONMMUG061335.1	down	down	up
mmu-miR-6947-5p	Bcl11a	NONMMUG061335.1	down	down	up
mmu-miR-701-3p	Bcl11a	NONMMUG061335.1	down	down	up
mmu-miR-7b-5p	Bcl11a	NONMMUG061335.1	down	down	up
mmu-miR-879-3p	Bcl11a	NONMMUG061335.1	down	down	up
mmu-miR-376a-3p	Madd	NONMMUG010713.2	down	down	up
mmu-miR-377-5p	Madd	NONMMUG010713.2	down	down	up
mmu-miR-412-5p	Madd	NONMMUG010713.2	down	down	up
mmu-miR-677-5p	Madd	NONMMUG010713.2	down	down	up
mmu-miR-879-3p	Madd	NONMMUG010713.2	down	down	up
mmu-miR-1193-3p	Ska3	NONMMUG051012.2	down	down	up
mmu-miR-134-3p	Ska3	NONMMUG051012.2	down	down	up
mmu-miR-1969	Ska3	NONMMUG051012.2	down	down	up
mmu-miR-196a-5p	Ska3	NONMMUG051012.2	down	down	up
mmu-miR-3072-3p	Ska3	NONMMUG051012.2	down	down	up
mmu-miR-376a-3p	Ska3	NONMMUG051012.2	down	down	up
mmu-miR-376a-5p	Ska3	NONMMUG051012.2	down	down	up
mmu-miR-377-5p	Ska3	NONMMUG051012.2	down	down	up
mmu-miR-412-5p	Ska3	NONMMUG051012.2	down	down	up
mmu-miR-483-3p	Ska3	NONMMUG051012.2	down	down	up
mmu-miR-677-5p	Ska3	NONMMUG051012.2	down	down	up
mmu-miR-6947-5p	Ska3	NONMMUG051012.2	down	down	up
mmu-miR-701-3p	Ska3	NONMMUG051012.2	down	down	up
mmu-miR-7240-5p	Ska3	NONMMUG051012.2	down	down	up
mmu-miR-7b-5p	Ska3	NONMMUG051012.2	down	down	up
mmu-miR-879-3p	Ska3	NONMMUG051012.2	down	down	up
mmu-miR-1193-3p	Ska3	NONMMUG002566.2	down	down	up
mmu-miR-134-3p	Ska3	NONMMUG002566.2	down	down	up
mmu-miR-1969	Ska3	NONMMUG002566.2	down	down	up
mmu-miR-196a-5p	Ska3	NONMMUG002566.2	down	down	up
mmu-miR-3072-3p	Ska3	NONMMUG002566.2	down	down	up
mmu-miR-376a-3p	Ska3	NONMMUG002566.2	down	down	up
mmu-miR-376a-5p	Ska3	NONMMUG002566.2	down	down	up
mmu-miR-377-5p	Ska3	NONMMUG002566.2	down	down	up
mmu-miR-412-5p	Ska3	NONMMUG002566.2	down	down	up
mmu-miR-483-3p	Ska3	NONMMUG002566.2	down	down	up
mmu-miR-677-5p	Ska3	NONMMUG002566.2	down	down	up
mmu-miR-6947-5p	Ska3	NONMMUG002566.2	down	down	up
mmu-miR-701-3p	Ska3	NONMMUG002566.2	down	down	up
mmu-miR-7240-5p	Ska3	NONMMUG002566.2	down	down	up
mmu-miR-7b-5p	Ska3	NONMMUG002566.2	down	down	up
mmu-miR-879-3p	Ska3	NONMMUG002566.2	down	down	up
mmu-miR-1193-3p	Ska3	NONMMUG061335.1	down	down	up
mmu-miR-134-3p	Ska3	NONMMUG061335.1	down	down	up
mmu-miR-1969	Ska3	NONMMUG061335.1	down	down	up
mmu-miR-196a-5p	Ska3	NONMMUG061335.1	down	down	up
mmu-miR-3072-3p	Ska3	NONMMUG061335.1	down	down	up
mmu-miR-376a-3p	Ska3	NONMMUG061335.1	down	down	up
mmu-miR-376a-5p	Ska3	NONMMUG061335.1	down	down	up
mmu-miR-377-5p	Ska3	NONMMUG061335.1	down	down	up
mmu-miR-412-5p	Ska3	NONMMUG061335.1	down	down	up
mmu-miR-483-3p	Ska3	NONMMUG061335.1	down	down	up
mmu-miR-677-5p	Ska3	NONMMUG061335.1	down	down	up
mmu-miR-6947-5p	Ska3	NONMMUG061335.1	down	down	up
mmu-miR-701-3p	Ska3	NONMMUG061335.1	down	down	up
mmu-miR-7240-5p	Ska3	NONMMUG061335.1	down	down	up
mmu-miR-7b-5p	Ska3	NONMMUG061335.1	down	down	up
mmu-miR-879-3p	Ska3	NONMMUG061335.1	down	down	up
mmu-miR-1193-3p	Foxm1	NONMMUG051012.2	down	down	up
mmu-miR-134-3p	Foxm1	NONMMUG051012.2	down	down	up
mmu-miR-1969	Foxm1	NONMMUG051012.2	down	down	up
mmu-miR-196a-5p	Foxm1	NONMMUG051012.2	down	down	up
mmu-miR-3072-3p	Foxm1	NONMMUG051012.2	down	down	up
mmu-miR-376a-3p	Foxm1	NONMMUG051012.2	down	down	up
mmu-miR-376a-5p	Foxm1	NONMMUG051012.2	down	down	up
mmu-miR-3963	Foxm1	NONMMUG051012.2	down	down	up
mmu-miR-412-5p	Foxm1	NONMMUG051012.2	down	down	up
mmu-miR-483-3p	Foxm1	NONMMUG051012.2	down	down	up
mmu-miR-677-5p	Foxm1	NONMMUG051012.2	down	down	up
mmu-miR-6947-5p	Foxm1	NONMMUG051012.2	down	down	up
mmu-miR-701-3p	Foxm1	NONMMUG051012.2	down	down	up
mmu-miR-7b-5p	Foxm1	NONMMUG051012.2	down	down	up
mmu-miR-879-3p	Foxm1	NONMMUG051012.2	down	down	up
mmu-miR-103-2-5p	Skp2	NONMMUG029249.2	down	down	up
mmu-miR-1193-3p	Skp2	NONMMUG029249.2	down	down	up
mmu-miR-134-3p	Skp2	NONMMUG029249.2	down	down	up
mmu-miR-1969	Skp2	NONMMUG029249.2	down	down	up
mmu-miR-196a-5p	Skp2	NONMMUG029249.2	down	down	up
mmu-miR-3072-3p	Skp2	NONMMUG029249.2	down	down	up
mmu-miR-376a-3p	Skp2	NONMMUG029249.2	down	down	up
mmu-miR-376a-5p	Skp2	NONMMUG029249.2	down	down	up
mmu-miR-377-5p	Skp2	NONMMUG029249.2	down	down	up
mmu-miR-412-5p	Skp2	NONMMUG029249.2	down	down	up
mmu-miR-483-3p	Skp2	NONMMUG029249.2	down	down	up
mmu-miR-677-5p	Skp2	NONMMUG029249.2	down	down	up
mmu-miR-6947-5p	Skp2	NONMMUG029249.2	down	down	up
mmu-miR-701-3p	Skp2	NONMMUG029249.2	down	down	up
mmu-miR-7240-5p	Skp2	NONMMUG029249.2	down	down	up
mmu-miR-7b-5p	Skp2	NONMMUG029249.2	down	down	up
mmu-miR-879-3p	Skp2	NONMMUG029249.2	down	down	up
mmu-miR-1199-5p	Ap1s3	NONMMUG027420.2	up	up	down
mmu-miR-12191-3p	Ap1s3	NONMMUG027420.2	up	up	down
mmu-miR-129-2-3p	Ap1s3	NONMMUG027420.2	up	up	down
mmu-miR-129-5p	Ap1s3	NONMMUG027420.2	up	up	down
mmu-miR-1298-5p	Ap1s3	NONMMUG027420.2	up	up	down
mmu-miR-146a-3p	Ap1s3	NONMMUG027420.2	up	up	down
mmu-miR-1912-3p	Ap1s3	NONMMUG027420.2	up	up	down
mmu-miR-201-5p	Ap1s3	NONMMUG027420.2	up	up	down
mmu-miR-204-3p	Ap1s3	NONMMUG027420.2	up	up	down
mmu-miR-384-3p	Ap1s3	NONMMUG027420.2	up	up	down
mmu-miR-449a-3p	Ap1s3	NONMMUG027420.2	up	up	down
mmu-miR-449c-5p	Ap1s3	NONMMUG027420.2	up	up	down
mmu-miR-465b-5p	Ap1s3	NONMMUG027420.2	up	up	down
mmu-miR-489-3p	Ap1s3	NONMMUG027420.2	up	up	down
mmu-miR-497a-3p	Ap1s3	NONMMUG027420.2	up	up	down
mmu-miR-5103	Ap1s3	NONMMUG027420.2	up	up	down
mmu-miR-653-3p	Ap1s3	NONMMUG027420.2	up	up	down
mmu-miR-653-5p	Ap1s3	NONMMUG027420.2	up	up	down
mmu-miR-7063-3p	Ap1s3	NONMMUG027420.2	up	up	down
mmu-miR-7661-5p	Ap1s3	NONMMUG027420.2	up	up	down
mmu-miR-7667-5p	Ap1s3	NONMMUG027420.2	up	up	down
mmu-miR-871-3p	Ap1s3	NONMMUG027420.2	up	up	down
mmu-miR-881-3p	Ap1s3	NONMMUG027420.2	up	up	down
mmu-miR-1199-5p	Kcnb2	NONMMUG066522.1	up	up	down
mmu-miR-129-5p	Kcnb2	NONMMUG066522.1	up	up	down
mmu-miR-1298-5p	Kcnb2	NONMMUG066522.1	up	up	down
mmu-miR-204-3p	Kcnb2	NONMMUG066522.1	up	up	down
mmu-miR-384-3p	Kcnb2	NONMMUG066522.1	up	up	down
mmu-miR-449a-3p	Kcnb2	NONMMUG066522.1	up	up	down
mmu-miR-449c-5p	Kcnb2	NONMMUG066522.1	up	up	down
mmu-miR-5103	Kcnb2	NONMMUG066522.1	up	up	down
mmu-miR-653-5p	Kcnb2	NONMMUG066522.1	up	up	down
mmu-miR-871-3p	Kcnb2	NONMMUG066522.1	up	up	down
mmu-miR-881-3p	Kcnb2	NONMMUG066522.1	up	up	down
mmu-miR-129-5p	Ppp2ca	NONMMUG024536.2	up	up	down
mmu-miR-204-3p	Ppp2ca	NONMMUG024536.2	up	up	down
mmu-miR-1199-5p	Ppp2ca	NONMMUG025014.2	up	up	down
mmu-miR-129-5p	Ppp2ca	NONMMUG025014.2	up	up	down
mmu-miR-204-3p	Ppp2ca	NONMMUG025014.2	up	up	down
mmu-miR-384-3p	Ppp2ca	NONMMUG025014.2	up	up	down
mmu-miR-449a-3p	Ppp2ca	NONMMUG025014.2	up	up	down
mmu-miR-5103	Ppp2ca	NONMMUG025014.2	up	up	down
mmu-miR-653-5p	Ppp2ca	NONMMUG025014.2	up	up	down
mmu-miR-129-5p	Ppp2ca	NONMMUG072834.1	up	up	down
mmu-miR-384-3p	Ppp2ca	NONMMUG072834.1	up	up	down
mmu-miR-5103	Ppp2ca	NONMMUG072834.1	up	up	down
mmu-miR-129-5p	Ppp2ca	NONMMUG045603.2	up	up	down
mmu-miR-204-3p	Ppp2ca	NONMMUG045603.2	up	up	down
mmu-miR-384-3p	Ppp2ca	NONMMUG045603.2	up	up	down
mmu-miR-449a-3p	Ppp2ca	NONMMUG045603.2	up	up	down
mmu-miR-5103	Ppp2ca	NONMMUG045603.2	up	up	down
mmu-miR-653-5p	Ppp2ca	NONMMUG045603.2	up	up	down
mmu-miR-129-5p	Ppp2ca	NONMMUG017114.2	up	up	down
mmu-miR-204-3p	Ppp2ca	NONMMUG017114.2	up	up	down
mmu-miR-384-3p	Ppp2ca	NONMMUG017114.2	up	up	down
mmu-miR-5103	Ppp2ca	NONMMUG017114.2	up	up	down
mmu-miR-129-5p	Ppp2ca	NONMMUG066594.1	up	up	down
mmu-miR-384-3p	Ppp2ca	NONMMUG066594.1	up	up	down
mmu-miR-5103	Ppp2ca	NONMMUG066594.1	up	up	down
mmu-miR-129-5p	Apeh	NONMMUG024536.2	up	up	down
mmu-miR-129-5p	Apeh	NONMMUG025014.2	up	up	down
mmu-miR-129-5p	Apeh	NONMMUG072834.1	up	up	down
mmu-miR-129-5p	Apeh	NONMMUG017114.2	up	up	down
mmu-miR-1193-3p	Bpifa2	NONMMUG051012.2	down	down	up
mmu-miR-196a-5p	Bpifa2	NONMMUG051012.2	down	down	up
mmu-miR-3072-3p	Bpifa2	NONMMUG051012.2	down	down	up
mmu-miR-376a-3p	Bpifa2	NONMMUG051012.2	down	down	up
mmu-miR-376a-5p	Bpifa2	NONMMUG051012.2	down	down	up
mmu-miR-377-5p	Bpifa2	NONMMUG051012.2	down	down	up
mmu-miR-412-5p	Bpifa2	NONMMUG051012.2	down	down	up
mmu-miR-483-3p	Bpifa2	NONMMUG051012.2	down	down	up
mmu-miR-677-5p	Bpifa2	NONMMUG051012.2	down	down	up
mmu-miR-6947-5p	Bpifa2	NONMMUG051012.2	down	down	up
mmu-miR-701-3p	Bpifa2	NONMMUG051012.2	down	down	up
mmu-miR-7b-5p	Bpifa2	NONMMUG051012.2	down	down	up
mmu-miR-879-3p	Bpifa2	NONMMUG051012.2	down	down	up
mmu-miR-1193-3p	Bpifa2	NONMMUG000075.2	down	down	up
mmu-miR-3072-3p	Bpifa2	NONMMUG000075.2	down	down	up
mmu-miR-376a-3p	Bpifa2	NONMMUG000075.2	down	down	up
mmu-miR-376a-5p	Bpifa2	NONMMUG000075.2	down	down	up
mmu-miR-377-5p	Bpifa2	NONMMUG000075.2	down	down	up
mmu-miR-412-5p	Bpifa2	NONMMUG000075.2	down	down	up
mmu-miR-483-3p	Bpifa2	NONMMUG000075.2	down	down	up
mmu-miR-677-5p	Bpifa2	NONMMUG000075.2	down	down	up
mmu-miR-6947-5p	Bpifa2	NONMMUG000075.2	down	down	up
mmu-miR-701-3p	Bpifa2	NONMMUG000075.2	down	down	up
mmu-miR-7b-5p	Bpifa2	NONMMUG000075.2	down	down	up
mmu-miR-879-3p	Bpifa2	NONMMUG000075.2	down	down	up
mmu-miR-103-2-5p	Mapkap1	NONMMUG072266.1	down	down	up
mmu-miR-1193-3p	Mapkap1	NONMMUG072266.1	down	down	up
mmu-miR-134-3p	Mapkap1	NONMMUG072266.1	down	down	up
mmu-miR-1969	Mapkap1	NONMMUG072266.1	down	down	up
mmu-miR-196a-5p	Mapkap1	NONMMUG072266.1	down	down	up
mmu-miR-3072-3p	Mapkap1	NONMMUG072266.1	down	down	up
mmu-miR-376a-3p	Mapkap1	NONMMUG072266.1	down	down	up
mmu-miR-412-5p	Mapkap1	NONMMUG072266.1	down	down	up
mmu-miR-483-3p	Mapkap1	NONMMUG072266.1	down	down	up
mmu-miR-677-5p	Mapkap1	NONMMUG072266.1	down	down	up
mmu-miR-7240-5p	Mapkap1	NONMMUG072266.1	down	down	up
mmu-miR-7b-5p	Mapkap1	NONMMUG072266.1	down	down	up
mmu-miR-879-3p	Mapkap1	NONMMUG072266.1	down	down	up
mmu-miR-103-2-5p	Mtbp	NONMMUG036531.2	down	down	up
mmu-miR-1193-3p	Mtbp	NONMMUG036531.2	down	down	up
mmu-miR-134-3p	Mtbp	NONMMUG036531.2	down	down	up
mmu-miR-1969	Mtbp	NONMMUG036531.2	down	down	up
mmu-miR-196a-5p	Mtbp	NONMMUG036531.2	down	down	up
mmu-miR-3072-3p	Mtbp	NONMMUG036531.2	down	down	up
mmu-miR-376a-3p	Mtbp	NONMMUG036531.2	down	down	up
mmu-miR-376a-5p	Mtbp	NONMMUG036531.2	down	down	up
mmu-miR-377-5p	Mtbp	NONMMUG036531.2	down	down	up
mmu-miR-412-5p	Mtbp	NONMMUG036531.2	down	down	up
mmu-miR-483-3p	Mtbp	NONMMUG036531.2	down	down	up
mmu-miR-677-5p	Mtbp	NONMMUG036531.2	down	down	up
mmu-miR-6947-5p	Mtbp	NONMMUG036531.2	down	down	up
mmu-miR-7240-5p	Mtbp	NONMMUG036531.2	down	down	up
mmu-miR-7b-5p	Mtbp	NONMMUG036531.2	down	down	up
mmu-miR-879-3p	Mtbp	NONMMUG036531.2	down	down	up
mmu-miR-1193-3p	Klrb1c	NONMMUG000075.2	down	down	up
mmu-miR-3072-3p	Klrb1c	NONMMUG000075.2	down	down	up
mmu-miR-376a-3p	Klrb1c	NONMMUG000075.2	down	down	up
mmu-miR-376a-5p	Klrb1c	NONMMUG000075.2	down	down	up
mmu-miR-377-5p	Klrb1c	NONMMUG000075.2	down	down	up
mmu-miR-412-5p	Klrb1c	NONMMUG000075.2	down	down	up
mmu-miR-483-3p	Klrb1c	NONMMUG000075.2	down	down	up
mmu-miR-677-5p	Klrb1c	NONMMUG000075.2	down	down	up
mmu-miR-6947-5p	Klrb1c	NONMMUG000075.2	down	down	up
mmu-miR-701-3p	Klrb1c	NONMMUG000075.2	down	down	up
mmu-miR-7b-5p	Klrb1c	NONMMUG000075.2	down	down	up
mmu-miR-879-3p	Klrb1c	NONMMUG000075.2	down	down	up
mmu-miR-103-2-5p	Prkcd	NONMMUG022225.2	down	down	up
mmu-miR-1193-3p	Prkcd	NONMMUG022225.2	down	down	up
mmu-miR-134-3p	Prkcd	NONMMUG022225.2	down	down	up
mmu-miR-1969	Prkcd	NONMMUG022225.2	down	down	up
mmu-miR-196a-5p	Prkcd	NONMMUG022225.2	down	down	up
mmu-miR-3072-3p	Prkcd	NONMMUG022225.2	down	down	up
mmu-miR-376a-3p	Prkcd	NONMMUG022225.2	down	down	up
mmu-miR-376a-5p	Prkcd	NONMMUG022225.2	down	down	up
mmu-miR-377-5p	Prkcd	NONMMUG022225.2	down	down	up
mmu-miR-412-5p	Prkcd	NONMMUG022225.2	down	down	up
mmu-miR-483-3p	Prkcd	NONMMUG022225.2	down	down	up
mmu-miR-677-5p	Prkcd	NONMMUG022225.2	down	down	up
mmu-miR-6947-5p	Prkcd	NONMMUG022225.2	down	down	up
mmu-miR-701-3p	Prkcd	NONMMUG022225.2	down	down	up
mmu-miR-7240-5p	Prkcd	NONMMUG022225.2	down	down	up
mmu-miR-7b-5p	Prkcd	NONMMUG022225.2	down	down	up
mmu-miR-879-3p	Prkcd	NONMMUG022225.2	down	down	up
mmu-miR-1199-5p	1700088E04Rik	NONMMUG027420.2	up	up	down
mmu-miR-12191-3p	1700088E04Rik	NONMMUG027420.2	up	up	down
mmu-miR-129-2-3p	1700088E04Rik	NONMMUG027420.2	up	up	down
mmu-miR-129-5p	1700088E04Rik	NONMMUG027420.2	up	up	down
mmu-miR-1298-5p	1700088E04Rik	NONMMUG027420.2	up	up	down
mmu-miR-146a-3p	1700088E04Rik	NONMMUG027420.2	up	up	down
mmu-miR-201-5p	1700088E04Rik	NONMMUG027420.2	up	up	down
mmu-miR-204-3p	1700088E04Rik	NONMMUG027420.2	up	up	down
mmu-miR-384-3p	1700088E04Rik	NONMMUG027420.2	up	up	down
mmu-miR-448-3p	1700088E04Rik	NONMMUG027420.2	up	up	down
mmu-miR-449a-3p	1700088E04Rik	NONMMUG027420.2	up	up	down
mmu-miR-449c-5p	1700088E04Rik	NONMMUG027420.2	up	up	down
mmu-miR-465b-5p	1700088E04Rik	NONMMUG027420.2	up	up	down
mmu-miR-489-3p	1700088E04Rik	NONMMUG027420.2	up	up	down
mmu-miR-497a-3p	1700088E04Rik	NONMMUG027420.2	up	up	down
mmu-miR-5103	1700088E04Rik	NONMMUG027420.2	up	up	down
mmu-miR-653-3p	1700088E04Rik	NONMMUG027420.2	up	up	down
mmu-miR-653-5p	1700088E04Rik	NONMMUG027420.2	up	up	down
mmu-miR-7063-3p	1700088E04Rik	NONMMUG027420.2	up	up	down
mmu-miR-7661-5p	1700088E04Rik	NONMMUG027420.2	up	up	down
mmu-miR-7667-5p	1700088E04Rik	NONMMUG027420.2	up	up	down
mmu-miR-871-3p	1700088E04Rik	NONMMUG027420.2	up	up	down
mmu-miR-881-3p	1700088E04Rik	NONMMUG027420.2	up	up	down
mmu-miR-103-2-5p	Diaph3	NONMMUG044362.2	down	down	up
mmu-miR-1193-3p	Diaph3	NONMMUG044362.2	down	down	up
mmu-miR-134-3p	Diaph3	NONMMUG044362.2	down	down	up
mmu-miR-1969	Diaph3	NONMMUG044362.2	down	down	up
mmu-miR-196a-5p	Diaph3	NONMMUG044362.2	down	down	up
mmu-miR-3072-3p	Diaph3	NONMMUG044362.2	down	down	up
mmu-miR-376a-3p	Diaph3	NONMMUG044362.2	down	down	up
mmu-miR-376a-5p	Diaph3	NONMMUG044362.2	down	down	up
mmu-miR-377-5p	Diaph3	NONMMUG044362.2	down	down	up
mmu-miR-412-5p	Diaph3	NONMMUG044362.2	down	down	up
mmu-miR-483-3p	Diaph3	NONMMUG044362.2	down	down	up
mmu-miR-677-5p	Diaph3	NONMMUG044362.2	down	down	up
mmu-miR-701-3p	Diaph3	NONMMUG044362.2	down	down	up
mmu-miR-7240-5p	Diaph3	NONMMUG044362.2	down	down	up
mmu-miR-7b-5p	Diaph3	NONMMUG044362.2	down	down	up
mmu-miR-879-3p	Diaph3	NONMMUG044362.2	down	down	up
mmu-miR-103-2-5p	Esco2	NONMMUG029249.2	down	down	up
mmu-miR-1193-3p	Esco2	NONMMUG029249.2	down	down	up
mmu-miR-134-3p	Esco2	NONMMUG029249.2	down	down	up
mmu-miR-1969	Esco2	NONMMUG029249.2	down	down	up
mmu-miR-196a-5p	Esco2	NONMMUG029249.2	down	down	up
mmu-miR-3072-3p	Esco2	NONMMUG029249.2	down	down	up
mmu-miR-376a-3p	Esco2	NONMMUG029249.2	down	down	up
mmu-miR-376a-5p	Esco2	NONMMUG029249.2	down	down	up
mmu-miR-377-5p	Esco2	NONMMUG029249.2	down	down	up
mmu-miR-412-5p	Esco2	NONMMUG029249.2	down	down	up
mmu-miR-483-3p	Esco2	NONMMUG029249.2	down	down	up
mmu-miR-677-5p	Esco2	NONMMUG029249.2	down	down	up
mmu-miR-6947-5p	Esco2	NONMMUG029249.2	down	down	up
mmu-miR-701-3p	Esco2	NONMMUG029249.2	down	down	up
mmu-miR-7240-5p	Esco2	NONMMUG029249.2	down	down	up
mmu-miR-7b-5p	Esco2	NONMMUG029249.2	down	down	up
mmu-miR-879-3p	Esco2	NONMMUG029249.2	down	down	up
mmu-miR-103-2-5p	Esco2	NONMMUG061335.1	down	down	up
mmu-miR-1193-3p	Esco2	NONMMUG061335.1	down	down	up
mmu-miR-134-3p	Esco2	NONMMUG061335.1	down	down	up
mmu-miR-1969	Esco2	NONMMUG061335.1	down	down	up
mmu-miR-196a-5p	Esco2	NONMMUG061335.1	down	down	up
mmu-miR-3072-3p	Esco2	NONMMUG061335.1	down	down	up
mmu-miR-376a-3p	Esco2	NONMMUG061335.1	down	down	up
mmu-miR-376a-5p	Esco2	NONMMUG061335.1	down	down	up
mmu-miR-377-5p	Esco2	NONMMUG061335.1	down	down	up
mmu-miR-412-5p	Esco2	NONMMUG061335.1	down	down	up
mmu-miR-483-3p	Esco2	NONMMUG061335.1	down	down	up
mmu-miR-677-5p	Esco2	NONMMUG061335.1	down	down	up
mmu-miR-6947-5p	Esco2	NONMMUG061335.1	down	down	up
mmu-miR-701-3p	Esco2	NONMMUG061335.1	down	down	up
mmu-miR-7240-5p	Esco2	NONMMUG061335.1	down	down	up
mmu-miR-7b-5p	Esco2	NONMMUG061335.1	down	down	up
mmu-miR-879-3p	Esco2	NONMMUG061335.1	down	down	up
mmu-miR-103-2-5p	Hinfp	NONMMUG022225.2	down	down	up
mmu-miR-1193-3p	Hinfp	NONMMUG022225.2	down	down	up
mmu-miR-134-3p	Hinfp	NONMMUG022225.2	down	down	up
mmu-miR-1969	Hinfp	NONMMUG022225.2	down	down	up
mmu-miR-196a-5p	Hinfp	NONMMUG022225.2	down	down	up
mmu-miR-3072-3p	Hinfp	NONMMUG022225.2	down	down	up
mmu-miR-376a-3p	Hinfp	NONMMUG022225.2	down	down	up
mmu-miR-376a-5p	Hinfp	NONMMUG022225.2	down	down	up
mmu-miR-377-5p	Hinfp	NONMMUG022225.2	down	down	up
mmu-miR-412-5p	Hinfp	NONMMUG022225.2	down	down	up
mmu-miR-483-3p	Hinfp	NONMMUG022225.2	down	down	up
mmu-miR-677-5p	Hinfp	NONMMUG022225.2	down	down	up
mmu-miR-6947-5p	Hinfp	NONMMUG022225.2	down	down	up
mmu-miR-701-3p	Hinfp	NONMMUG022225.2	down	down	up
mmu-miR-7240-5p	Hinfp	NONMMUG022225.2	down	down	up
mmu-miR-7b-5p	Hinfp	NONMMUG022225.2	down	down	up
mmu-miR-879-3p	Hinfp	NONMMUG022225.2	down	down	up
mmu-miR-1193-3p	Slfn9	NONMMUG002566.2	down	down	up
mmu-miR-134-3p	Slfn9	NONMMUG002566.2	down	down	up
mmu-miR-1969	Slfn9	NONMMUG002566.2	down	down	up
mmu-miR-196a-5p	Slfn9	NONMMUG002566.2	down	down	up
mmu-miR-3072-3p	Slfn9	NONMMUG002566.2	down	down	up
mmu-miR-376a-3p	Slfn9	NONMMUG002566.2	down	down	up
mmu-miR-376a-5p	Slfn9	NONMMUG002566.2	down	down	up
mmu-miR-377-5p	Slfn9	NONMMUG002566.2	down	down	up
mmu-miR-412-5p	Slfn9	NONMMUG002566.2	down	down	up
mmu-miR-483-3p	Slfn9	NONMMUG002566.2	down	down	up
mmu-miR-677-5p	Slfn9	NONMMUG002566.2	down	down	up
mmu-miR-6947-5p	Slfn9	NONMMUG002566.2	down	down	up
mmu-miR-701-3p	Slfn9	NONMMUG002566.2	down	down	up
mmu-miR-7240-5p	Slfn9	NONMMUG002566.2	down	down	up
mmu-miR-7b-5p	Slfn9	NONMMUG002566.2	down	down	up
mmu-miR-879-3p	Slfn9	NONMMUG002566.2	down	down	up
mmu-miR-103-2-5p	Slfn9	NONMMUG061335.1	down	down	up
mmu-miR-1193-3p	Slfn9	NONMMUG061335.1	down	down	up
mmu-miR-134-3p	Slfn9	NONMMUG061335.1	down	down	up
mmu-miR-1969	Slfn9	NONMMUG061335.1	down	down	up
mmu-miR-196a-5p	Slfn9	NONMMUG061335.1	down	down	up
mmu-miR-3072-3p	Slfn9	NONMMUG061335.1	down	down	up
mmu-miR-376a-3p	Slfn9	NONMMUG061335.1	down	down	up
mmu-miR-376a-5p	Slfn9	NONMMUG061335.1	down	down	up
mmu-miR-377-5p	Slfn9	NONMMUG061335.1	down	down	up
mmu-miR-412-5p	Slfn9	NONMMUG061335.1	down	down	up
mmu-miR-483-3p	Slfn9	NONMMUG061335.1	down	down	up
mmu-miR-677-5p	Slfn9	NONMMUG061335.1	down	down	up
mmu-miR-6947-5p	Slfn9	NONMMUG061335.1	down	down	up
mmu-miR-701-3p	Slfn9	NONMMUG061335.1	down	down	up
mmu-miR-7240-5p	Slfn9	NONMMUG061335.1	down	down	up
mmu-miR-7b-5p	Slfn9	NONMMUG061335.1	down	down	up
mmu-miR-879-3p	Slfn9	NONMMUG061335.1	down	down	up
mmu-miR-129-5p	Aqp11	NONMMUG036054.2	up	up	down
mmu-miR-129-5p	Aqp11	NONMMUG017114.2	up	up	down
mmu-miR-103-2-5p	Neil3	NONMMUG044362.2	down	down	up
mmu-miR-1193-3p	Neil3	NONMMUG044362.2	down	down	up
mmu-miR-134-3p	Neil3	NONMMUG044362.2	down	down	up
mmu-miR-1969	Neil3	NONMMUG044362.2	down	down	up
mmu-miR-196a-5p	Neil3	NONMMUG044362.2	down	down	up
mmu-miR-3072-3p	Neil3	NONMMUG044362.2	down	down	up
mmu-miR-376a-3p	Neil3	NONMMUG044362.2	down	down	up
mmu-miR-376a-5p	Neil3	NONMMUG044362.2	down	down	up
mmu-miR-377-5p	Neil3	NONMMUG044362.2	down	down	up
mmu-miR-412-5p	Neil3	NONMMUG044362.2	down	down	up
mmu-miR-483-3p	Neil3	NONMMUG044362.2	down	down	up
mmu-miR-677-5p	Neil3	NONMMUG044362.2	down	down	up
mmu-miR-701-3p	Neil3	NONMMUG044362.2	down	down	up
mmu-miR-7240-5p	Neil3	NONMMUG044362.2	down	down	up
mmu-miR-7b-5p	Neil3	NONMMUG044362.2	down	down	up
mmu-miR-879-3p	Neil3	NONMMUG044362.2	down	down	up
mmu-miR-103-2-5p	Nrxn1	NONMMUG022225.2	down	down	up
mmu-miR-1193-3p	Nrxn1	NONMMUG022225.2	down	down	up
mmu-miR-134-3p	Nrxn1	NONMMUG022225.2	down	down	up
mmu-miR-1969	Nrxn1	NONMMUG022225.2	down	down	up
mmu-miR-196a-5p	Nrxn1	NONMMUG022225.2	down	down	up
mmu-miR-3072-3p	Nrxn1	NONMMUG022225.2	down	down	up
mmu-miR-376a-3p	Nrxn1	NONMMUG022225.2	down	down	up
mmu-miR-376a-5p	Nrxn1	NONMMUG022225.2	down	down	up
mmu-miR-377-5p	Nrxn1	NONMMUG022225.2	down	down	up
mmu-miR-412-5p	Nrxn1	NONMMUG022225.2	down	down	up
mmu-miR-483-3p	Nrxn1	NONMMUG022225.2	down	down	up
mmu-miR-677-5p	Nrxn1	NONMMUG022225.2	down	down	up
mmu-miR-6947-5p	Nrxn1	NONMMUG022225.2	down	down	up
mmu-miR-701-3p	Nrxn1	NONMMUG022225.2	down	down	up
mmu-miR-7240-5p	Nrxn1	NONMMUG022225.2	down	down	up
mmu-miR-7b-5p	Nrxn1	NONMMUG022225.2	down	down	up
mmu-miR-879-3p	Nrxn1	NONMMUG022225.2	down	down	up
mmu-miR-146a-3p	Toe1	NONMMUG077213.1	up	up	down
mmu-miR-1199-5p	9530068E07Rik	NONMMUG036652.2	up	up	down
mmu-miR-129-5p	9530068E07Rik	NONMMUG036652.2	up	up	down
mmu-miR-204-3p	9530068E07Rik	NONMMUG036652.2	up	up	down
mmu-miR-5103	9530068E07Rik	NONMMUG036652.2	up	up	down
mmu-miR-103-2-5p	Evi2a	NONMMUG057093.1	down	down	up
mmu-miR-1193-3p	Evi2a	NONMMUG057093.1	down	down	up
mmu-miR-134-3p	Evi2a	NONMMUG057093.1	down	down	up
mmu-miR-1969	Evi2a	NONMMUG057093.1	down	down	up
mmu-miR-196a-5p	Evi2a	NONMMUG057093.1	down	down	up
mmu-miR-3072-3p	Evi2a	NONMMUG057093.1	down	down	up
mmu-miR-412-5p	Evi2a	NONMMUG057093.1	down	down	up
mmu-miR-483-3p	Evi2a	NONMMUG057093.1	down	down	up
mmu-miR-677-5p	Evi2a	NONMMUG057093.1	down	down	up
mmu-miR-7240-5p	Evi2a	NONMMUG057093.1	down	down	up
mmu-miR-103-2-5p	Tlr11	NONMMUG036531.2	down	down	up
mmu-miR-1193-3p	Tlr11	NONMMUG036531.2	down	down	up
mmu-miR-134-3p	Tlr11	NONMMUG036531.2	down	down	up
mmu-miR-1969	Tlr11	NONMMUG036531.2	down	down	up
mmu-miR-196a-5p	Tlr11	NONMMUG036531.2	down	down	up
mmu-miR-3072-3p	Tlr11	NONMMUG036531.2	down	down	up
mmu-miR-376a-3p	Tlr11	NONMMUG036531.2	down	down	up
mmu-miR-376a-5p	Tlr11	NONMMUG036531.2	down	down	up
mmu-miR-377-5p	Tlr11	NONMMUG036531.2	down	down	up
mmu-miR-412-5p	Tlr11	NONMMUG036531.2	down	down	up
mmu-miR-483-3p	Tlr11	NONMMUG036531.2	down	down	up
mmu-miR-677-5p	Tlr11	NONMMUG036531.2	down	down	up
mmu-miR-6947-5p	Tlr11	NONMMUG036531.2	down	down	up
mmu-miR-7240-5p	Tlr11	NONMMUG036531.2	down	down	up
mmu-miR-7b-5p	Tlr11	NONMMUG036531.2	down	down	up
mmu-miR-879-3p	Tlr11	NONMMUG036531.2	down	down	up
mmu-miR-103-2-5p	Tlr11	NONMMUG022225.2	down	down	up
mmu-miR-1193-3p	Tlr11	NONMMUG022225.2	down	down	up
mmu-miR-134-3p	Tlr11	NONMMUG022225.2	down	down	up
mmu-miR-1969	Tlr11	NONMMUG022225.2	down	down	up
mmu-miR-196a-5p	Tlr11	NONMMUG022225.2	down	down	up
mmu-miR-3072-3p	Tlr11	NONMMUG022225.2	down	down	up
mmu-miR-376a-3p	Tlr11	NONMMUG022225.2	down	down	up
mmu-miR-376a-5p	Tlr11	NONMMUG022225.2	down	down	up
mmu-miR-377-5p	Tlr11	NONMMUG022225.2	down	down	up
mmu-miR-412-5p	Tlr11	NONMMUG022225.2	down	down	up
mmu-miR-483-3p	Tlr11	NONMMUG022225.2	down	down	up
mmu-miR-677-5p	Tlr11	NONMMUG022225.2	down	down	up
mmu-miR-6947-5p	Tlr11	NONMMUG022225.2	down	down	up
mmu-miR-701-3p	Tlr11	NONMMUG022225.2	down	down	up
mmu-miR-7240-5p	Tlr11	NONMMUG022225.2	down	down	up
mmu-miR-7b-5p	Tlr11	NONMMUG022225.2	down	down	up
mmu-miR-879-3p	Tlr11	NONMMUG022225.2	down	down	up
mmu-miR-1193-3p	Ldlrad3	NONMMUG019867.3	down	down	up
mmu-miR-134-3p	Ldlrad3	NONMMUG019867.3	down	down	up
mmu-miR-1969	Ldlrad3	NONMMUG019867.3	down	down	up
mmu-miR-196a-5p	Ldlrad3	NONMMUG019867.3	down	down	up
mmu-miR-3072-3p	Ldlrad3	NONMMUG019867.3	down	down	up
mmu-miR-376a-3p	Ldlrad3	NONMMUG019867.3	down	down	up
mmu-miR-376a-5p	Ldlrad3	NONMMUG019867.3	down	down	up
mmu-miR-3963	Ldlrad3	NONMMUG019867.3	down	down	up
mmu-miR-412-5p	Ldlrad3	NONMMUG019867.3	down	down	up
mmu-miR-483-3p	Ldlrad3	NONMMUG019867.3	down	down	up
mmu-miR-677-5p	Ldlrad3	NONMMUG019867.3	down	down	up
mmu-miR-6947-5p	Ldlrad3	NONMMUG019867.3	down	down	up
mmu-miR-701-3p	Ldlrad3	NONMMUG019867.3	down	down	up
mmu-miR-7240-5p	Ldlrad3	NONMMUG019867.3	down	down	up
mmu-miR-7b-5p	Ldlrad3	NONMMUG019867.3	down	down	up
mmu-miR-879-3p	Ldlrad3	NONMMUG019867.3	down	down	up
mmu-miR-1193-3p	Ccna2	NONMMUG051012.2	down	down	up
mmu-miR-134-3p	Ccna2	NONMMUG051012.2	down	down	up
mmu-miR-1969	Ccna2	NONMMUG051012.2	down	down	up
mmu-miR-196a-5p	Ccna2	NONMMUG051012.2	down	down	up
mmu-miR-3072-3p	Ccna2	NONMMUG051012.2	down	down	up
mmu-miR-376a-3p	Ccna2	NONMMUG051012.2	down	down	up
mmu-miR-376a-5p	Ccna2	NONMMUG051012.2	down	down	up
mmu-miR-377-5p	Ccna2	NONMMUG051012.2	down	down	up
mmu-miR-412-5p	Ccna2	NONMMUG051012.2	down	down	up
mmu-miR-483-3p	Ccna2	NONMMUG051012.2	down	down	up
mmu-miR-677-5p	Ccna2	NONMMUG051012.2	down	down	up
mmu-miR-6947-5p	Ccna2	NONMMUG051012.2	down	down	up
mmu-miR-701-3p	Ccna2	NONMMUG051012.2	down	down	up
mmu-miR-7240-5p	Ccna2	NONMMUG051012.2	down	down	up
mmu-miR-7b-5p	Ccna2	NONMMUG051012.2	down	down	up
mmu-miR-879-3p	Ccna2	NONMMUG051012.2	down	down	up
mmu-miR-103-2-5p	Smap2	NONMMUG072266.1	down	down	up
mmu-miR-1193-3p	Smap2	NONMMUG072266.1	down	down	up
mmu-miR-134-3p	Smap2	NONMMUG072266.1	down	down	up
mmu-miR-1969	Smap2	NONMMUG072266.1	down	down	up
mmu-miR-196a-5p	Smap2	NONMMUG072266.1	down	down	up
mmu-miR-3072-3p	Smap2	NONMMUG072266.1	down	down	up
mmu-miR-376a-3p	Smap2	NONMMUG072266.1	down	down	up
mmu-miR-376a-5p	Smap2	NONMMUG072266.1	down	down	up
mmu-miR-412-5p	Smap2	NONMMUG072266.1	down	down	up
mmu-miR-483-3p	Smap2	NONMMUG072266.1	down	down	up
mmu-miR-677-5p	Smap2	NONMMUG072266.1	down	down	up
mmu-miR-6947-5p	Smap2	NONMMUG072266.1	down	down	up
mmu-miR-701-3p	Smap2	NONMMUG072266.1	down	down	up
mmu-miR-7240-5p	Smap2	NONMMUG072266.1	down	down	up
mmu-miR-7b-5p	Smap2	NONMMUG072266.1	down	down	up
mmu-miR-879-3p	Smap2	NONMMUG072266.1	down	down	up
mmu-miR-103-2-5p	Kcnb2	NONMMUG019867.3	down	down	up
mmu-miR-1193-3p	Kcnb2	NONMMUG019867.3	down	down	up
mmu-miR-134-3p	Kcnb2	NONMMUG019867.3	down	down	up
mmu-miR-1969	Kcnb2	NONMMUG019867.3	down	down	up
mmu-miR-196a-5p	Kcnb2	NONMMUG019867.3	down	down	up
mmu-miR-3072-3p	Kcnb2	NONMMUG019867.3	down	down	up
mmu-miR-376a-3p	Kcnb2	NONMMUG019867.3	down	down	up
mmu-miR-376a-5p	Kcnb2	NONMMUG019867.3	down	down	up
mmu-miR-3963	Kcnb2	NONMMUG019867.3	down	down	up
mmu-miR-412-5p	Kcnb2	NONMMUG019867.3	down	down	up
mmu-miR-483-3p	Kcnb2	NONMMUG019867.3	down	down	up
mmu-miR-677-5p	Kcnb2	NONMMUG019867.3	down	down	up
mmu-miR-6947-5p	Kcnb2	NONMMUG019867.3	down	down	up
mmu-miR-701-3p	Kcnb2	NONMMUG019867.3	down	down	up
mmu-miR-7240-5p	Kcnb2	NONMMUG019867.3	down	down	up
mmu-miR-7b-5p	Kcnb2	NONMMUG019867.3	down	down	up
mmu-miR-879-3p	Kcnb2	NONMMUG019867.3	down	down	up
mmu-miR-1193-3p	Cd248	NONMMUG019867.3	down	down	up
mmu-miR-134-3p	Cd248	NONMMUG019867.3	down	down	up
mmu-miR-1969	Cd248	NONMMUG019867.3	down	down	up
mmu-miR-196a-5p	Cd248	NONMMUG019867.3	down	down	up
mmu-miR-3072-3p	Cd248	NONMMUG019867.3	down	down	up
mmu-miR-376a-3p	Cd248	NONMMUG019867.3	down	down	up
mmu-miR-376a-5p	Cd248	NONMMUG019867.3	down	down	up
mmu-miR-3963	Cd248	NONMMUG019867.3	down	down	up
mmu-miR-412-5p	Cd248	NONMMUG019867.3	down	down	up
mmu-miR-483-3p	Cd248	NONMMUG019867.3	down	down	up
mmu-miR-677-5p	Cd248	NONMMUG019867.3	down	down	up
mmu-miR-6947-5p	Cd248	NONMMUG019867.3	down	down	up
mmu-miR-701-3p	Cd248	NONMMUG019867.3	down	down	up
mmu-miR-7240-5p	Cd248	NONMMUG019867.3	down	down	up
mmu-miR-7b-5p	Cd248	NONMMUG019867.3	down	down	up
mmu-miR-879-3p	Cd248	NONMMUG019867.3	down	down	up
mmu-miR-103-2-5p	Mettl27	NONMMUG022225.2	down	down	up
mmu-miR-1193-3p	Mettl27	NONMMUG022225.2	down	down	up
mmu-miR-134-3p	Mettl27	NONMMUG022225.2	down	down	up
mmu-miR-1969	Mettl27	NONMMUG022225.2	down	down	up
mmu-miR-196a-5p	Mettl27	NONMMUG022225.2	down	down	up
mmu-miR-3072-3p	Mettl27	NONMMUG022225.2	down	down	up
mmu-miR-376a-3p	Mettl27	NONMMUG022225.2	down	down	up
mmu-miR-376a-5p	Mettl27	NONMMUG022225.2	down	down	up
mmu-miR-377-5p	Mettl27	NONMMUG022225.2	down	down	up
mmu-miR-412-5p	Mettl27	NONMMUG022225.2	down	down	up
mmu-miR-483-3p	Mettl27	NONMMUG022225.2	down	down	up
mmu-miR-677-5p	Mettl27	NONMMUG022225.2	down	down	up
mmu-miR-6947-5p	Mettl27	NONMMUG022225.2	down	down	up
mmu-miR-701-3p	Mettl27	NONMMUG022225.2	down	down	up
mmu-miR-7240-5p	Mettl27	NONMMUG022225.2	down	down	up
mmu-miR-7b-5p	Mettl27	NONMMUG022225.2	down	down	up
mmu-miR-879-3p	Mettl27	NONMMUG022225.2	down	down	up
mmu-miR-1969	Fam13c	NONMMUG051962.1	down	down	up
mmu-miR-204-3p	Srrm2	NONMMUG002670.2	up	up	down
mmu-miR-1199-5p	Atxn7l1	NONMMUG023774.2	up	up	down
mmu-miR-129-5p	Atxn7l1	NONMMUG023774.2	up	up	down
mmu-miR-384-3p	Atxn7l1	NONMMUG023774.2	up	up	down
mmu-miR-5103	Atxn7l1	NONMMUG023774.2	up	up	down
mmu-miR-1199-5p	Atxn7l1	NONMMUG036652.2	up	up	down
mmu-miR-129-5p	Atxn7l1	NONMMUG036652.2	up	up	down
mmu-miR-384-3p	Atxn7l1	NONMMUG036652.2	up	up	down
mmu-miR-5103	Atxn7l1	NONMMUG036652.2	up	up	down
mmu-miR-129-5p	Atxn7l1	NONMMUG017114.2	up	up	down
mmu-miR-384-3p	Atxn7l1	NONMMUG017114.2	up	up	down
mmu-miR-5103	Atxn7l1	NONMMUG017114.2	up	up	down
mmu-miR-1193-3p	Kif15	NONMMUG051012.2	down	down	up
mmu-miR-134-3p	Kif15	NONMMUG051012.2	down	down	up
mmu-miR-1969	Kif15	NONMMUG051012.2	down	down	up
mmu-miR-196a-5p	Kif15	NONMMUG051012.2	down	down	up
mmu-miR-3072-3p	Kif15	NONMMUG051012.2	down	down	up
mmu-miR-376a-3p	Kif15	NONMMUG051012.2	down	down	up
mmu-miR-376a-5p	Kif15	NONMMUG051012.2	down	down	up
mmu-miR-377-5p	Kif15	NONMMUG051012.2	down	down	up
mmu-miR-3963	Kif15	NONMMUG051012.2	down	down	up
mmu-miR-412-5p	Kif15	NONMMUG051012.2	down	down	up
mmu-miR-483-3p	Kif15	NONMMUG051012.2	down	down	up
mmu-miR-677-5p	Kif15	NONMMUG051012.2	down	down	up
mmu-miR-6947-5p	Kif15	NONMMUG051012.2	down	down	up
mmu-miR-701-3p	Kif15	NONMMUG051012.2	down	down	up
mmu-miR-7240-5p	Kif15	NONMMUG051012.2	down	down	up
mmu-miR-7b-5p	Kif15	NONMMUG051012.2	down	down	up
mmu-miR-879-3p	Kif15	NONMMUG051012.2	down	down	up
mmu-miR-129-5p	Ccdc85a	NONMMUG066520.1	up	up	down
mmu-miR-204-3p	Ccdc85a	NONMMUG066520.1	up	up	down
mmu-miR-7679-3p	Ccdc85a	NONMMUG066520.1	up	up	down
mmu-miR-129-5p	Stx16	NONMMUG008449.2	up	up	down
mmu-miR-384-3p	Stx16	NONMMUG008449.2	up	up	down
mmu-miR-129-5p	Stx16	NONMMUG072834.1	up	up	down
mmu-miR-384-3p	Stx16	NONMMUG072834.1	up	up	down
mmu-miR-103-2-5p	Igkv5-43	NONMMUG044362.2	down	down	up
mmu-miR-1193-3p	Igkv5-43	NONMMUG044362.2	down	down	up
mmu-miR-134-3p	Igkv5-43	NONMMUG044362.2	down	down	up
mmu-miR-1969	Igkv5-43	NONMMUG044362.2	down	down	up
mmu-miR-196a-5p	Igkv5-43	NONMMUG044362.2	down	down	up
mmu-miR-3072-3p	Igkv5-43	NONMMUG044362.2	down	down	up
mmu-miR-376a-3p	Igkv5-43	NONMMUG044362.2	down	down	up
mmu-miR-376a-5p	Igkv5-43	NONMMUG044362.2	down	down	up
mmu-miR-377-5p	Igkv5-43	NONMMUG044362.2	down	down	up
mmu-miR-412-5p	Igkv5-43	NONMMUG044362.2	down	down	up
mmu-miR-483-3p	Igkv5-43	NONMMUG044362.2	down	down	up
mmu-miR-677-5p	Igkv5-43	NONMMUG044362.2	down	down	up
mmu-miR-701-3p	Igkv5-43	NONMMUG044362.2	down	down	up
mmu-miR-7240-5p	Igkv5-43	NONMMUG044362.2	down	down	up
mmu-miR-7b-5p	Igkv5-43	NONMMUG044362.2	down	down	up
mmu-miR-879-3p	Igkv5-43	NONMMUG044362.2	down	down	up
mmu-miR-129-5p	Bud23	NONMMUG015145.3	up	up	down
mmu-miR-497a-3p	Bud23	NONMMUG015145.3	up	up	down
mmu-miR-5103	Bud23	NONMMUG015145.3	up	up	down
mmu-miR-103-2-5p	Mki67	NONMMUG061335.1	down	down	up
mmu-miR-1193-3p	Mki67	NONMMUG061335.1	down	down	up
mmu-miR-134-3p	Mki67	NONMMUG061335.1	down	down	up
mmu-miR-1969	Mki67	NONMMUG061335.1	down	down	up
mmu-miR-196a-5p	Mki67	NONMMUG061335.1	down	down	up
mmu-miR-3072-3p	Mki67	NONMMUG061335.1	down	down	up
mmu-miR-376a-3p	Mki67	NONMMUG061335.1	down	down	up
mmu-miR-376a-5p	Mki67	NONMMUG061335.1	down	down	up
mmu-miR-377-5p	Mki67	NONMMUG061335.1	down	down	up
[truncated: 4,186 more rows]

## Sheet: UC-MSC lncNRA-miRNA-mRNA
miRNA	lnc	symbol	reg_miRNA	reg_mRNA	reg_lncRNA
mmu-miR-129-5p	NONMMUG025564.2	Rps6ka6	down	up	up
mmu-miR-135a-5p	NONMMUG025564.2	Rps6ka6	down	up	up
mmu-miR-208a-3p	NONMMUG025564.2	Rps6ka6	down	up	up
mmu-miR-489-3p	NONMMUG025564.2	Rps6ka6	down	up	up
mmu-miR-8103	NONMMUG025564.2	Rps6ka6	down	up	up
mmu-miR-196a-5p	NONMMUG016479.2	Sec16a	up	down	down
mmu-miR-3082-5p	NONMMUG016479.2	Sec16a	up	down	down
mmu-miR-3072-3p	NONMMUG045541.2	Runx1t1	up	down	down
mmu-miR-3082-5p	NONMMUG045541.2	Runx1t1	up	down	down
mmu-miR-3097-5p	NONMMUG045541.2	Runx1t1	up	down	down
mmu-miR-7079-3p	NONMMUG045541.2	Runx1t1	up	down	down
mmu-miR-7688-5p	NONMMUG045541.2	Runx1t1	up	down	down
mmu-miR-3072-3p	NONMMUG036751.2	Runx1t1	up	down	down
mmu-miR-3082-5p	NONMMUG036751.2	Runx1t1	up	down	down
mmu-miR-3097-5p	NONMMUG036751.2	Runx1t1	up	down	down
mmu-miR-7079-3p	NONMMUG036751.2	Runx1t1	up	down	down
mmu-miR-7688-5p	NONMMUG036751.2	Runx1t1	up	down	down
mmu-miR-3072-3p	NONMMUG028485.2	Runx1t1	up	down	down
mmu-miR-3082-5p	NONMMUG028485.2	Runx1t1	up	down	down
mmu-miR-3097-5p	NONMMUG028485.2	Runx1t1	up	down	down
mmu-miR-380-5p	NONMMUG028485.2	Runx1t1	up	down	down
mmu-miR-7079-3p	NONMMUG028485.2	Runx1t1	up	down	down
mmu-miR-7688-5p	NONMMUG028485.2	Runx1t1	up	down	down
mmu-miR-3072-3p	NONMMUG059201.1	Runx1t1	up	down	down
mmu-miR-3082-5p	NONMMUG059201.1	Runx1t1	up	down	down
mmu-miR-3097-5p	NONMMUG059201.1	Runx1t1	up	down	down
mmu-miR-7079-3p	NONMMUG059201.1	Runx1t1	up	down	down
mmu-miR-129-5p	NONMMUG066722.1	Lpl	down	up	up
mmu-miR-146b-3p	NONMMUG066722.1	Lpl	down	up	up
mmu-miR-146b-5p	NONMMUG066722.1	Lpl	down	up	up
mmu-miR-1956	NONMMUG066722.1	Lpl	down	up	up
mmu-miR-28b	NONMMUG066722.1	Lpl	down	up	up
mmu-miR-449a-3p	NONMMUG066722.1	Lpl	down	up	up
mmu-miR-466i-3p	NONMMUG066722.1	Lpl	down	up	up
mmu-miR-5615-3p	NONMMUG066722.1	Lpl	down	up	up
mmu-miR-7033-5p	NONMMUG066722.1	Lpl	down	up	up
mmu-miR-881-3p	NONMMUG066722.1	Lpl	down	up	up
mmu-miR-935	NONMMUG066722.1	Lpl	down	up	up
mmu-miR-28b	NONMMUG005660.2	Eln	down	up	up
mmu-miR-466i-3p	NONMMUG005660.2	Eln	down	up	up
mmu-miR-8103	NONMMUG005660.2	Eln	down	up	up
mmu-miR-139-3p	NONMMUG035780.2	Spen	up	down	down
mmu-miR-196a-5p	NONMMUG035780.2	Spen	up	down	down
mmu-miR-3072-3p	NONMMUG035780.2	Spen	up	down	down
mmu-miR-3082-5p	NONMMUG035780.2	Spen	up	down	down
mmu-miR-3097-5p	NONMMUG035780.2	Spen	up	down	down
mmu-miR-3099-3p	NONMMUG035780.2	Spen	up	down	down
mmu-miR-380-5p	NONMMUG035780.2	Spen	up	down	down
mmu-miR-6946-5p	NONMMUG035780.2	Spen	up	down	down
mmu-miR-7073-5p	NONMMUG035780.2	Spen	up	down	down
mmu-miR-7079-3p	NONMMUG035780.2	Spen	up	down	down
mmu-miR-7091-5p	NONMMUG035780.2	Spen	up	down	down
mmu-miR-7092-5p	NONMMUG035780.2	Spen	up	down	down
mmu-miR-7240-5p	NONMMUG035780.2	Spen	up	down	down
mmu-miR-7688-5p	NONMMUG035780.2	Spen	up	down	down
mmu-miR-7b-5p	NONMMUG035780.2	Spen	up	down	down
mmu-miR-139-3p	NONMMUG061465.1	Spen	up	down	down
mmu-miR-196a-5p	NONMMUG061465.1	Spen	up	down	down
mmu-miR-3072-3p	NONMMUG061465.1	Spen	up	down	down
mmu-miR-3082-5p	NONMMUG061465.1	Spen	up	down	down
mmu-miR-3097-5p	NONMMUG061465.1	Spen	up	down	down
mmu-miR-3099-3p	NONMMUG061465.1	Spen	up	down	down
mmu-miR-380-5p	NONMMUG061465.1	Spen	up	down	down
mmu-miR-6946-5p	NONMMUG061465.1	Spen	up	down	down
mmu-miR-7073-5p	NONMMUG061465.1	Spen	up	down	down
mmu-miR-7079-3p	NONMMUG061465.1	Spen	up	down	down
mmu-miR-7091-5p	NONMMUG061465.1	Spen	up	down	down
mmu-miR-7092-5p	NONMMUG061465.1	Spen	up	down	down
mmu-miR-7240-5p	NONMMUG061465.1	Spen	up	down	down
mmu-miR-7688-5p	NONMMUG061465.1	Spen	up	down	down
mmu-miR-7b-5p	NONMMUG061465.1	Spen	up	down	down
mmu-miR-139-3p	NONMMUG028056.2	Spen	up	down	down
mmu-miR-196a-5p	NONMMUG028056.2	Spen	up	down	down
mmu-miR-3072-3p	NONMMUG028056.2	Spen	up	down	down
mmu-miR-3082-5p	NONMMUG028056.2	Spen	up	down	down
mmu-miR-3097-5p	NONMMUG028056.2	Spen	up	down	down
mmu-miR-3099-3p	NONMMUG028056.2	Spen	up	down	down
mmu-miR-380-5p	NONMMUG028056.2	Spen	up	down	down
mmu-miR-6946-5p	NONMMUG028056.2	Spen	up	down	down
mmu-miR-7073-5p	NONMMUG028056.2	Spen	up	down	down
mmu-miR-7079-3p	NONMMUG028056.2	Spen	up	down	down
mmu-miR-7091-5p	NONMMUG028056.2	Spen	up	down	down
mmu-miR-7240-5p	NONMMUG028056.2	Spen	up	down	down
mmu-miR-7688-5p	NONMMUG028056.2	Spen	up	down	down
mmu-miR-7b-5p	NONMMUG028056.2	Spen	up	down	down
mmu-miR-7240-5p	NONMMUG000073.2	Pianp	up	down	down
mmu-miR-7b-5p	NONMMUG000073.2	Pianp	up	down	down
mmu-miR-3072-3p	NONMMUG017121.2	Tpd52l2	up	down	down
mmu-miR-3097-5p	NONMMUG017121.2	Tpd52l2	up	down	down
mmu-miR-3099-3p	NONMMUG017121.2	Tpd52l2	up	down	down
mmu-miR-380-5p	NONMMUG017121.2	Tpd52l2	up	down	down
mmu-miR-7073-5p	NONMMUG017121.2	Tpd52l2	up	down	down
mmu-miR-7079-3p	NONMMUG017121.2	Tpd52l2	up	down	down
mmu-miR-7091-5p	NONMMUG017121.2	Tpd52l2	up	down	down
mmu-miR-7240-5p	NONMMUG017121.2	Tpd52l2	up	down	down
mmu-miR-7688-5p	NONMMUG017121.2	Tpd52l2	up	down	down
mmu-miR-7b-5p	NONMMUG017121.2	Tpd52l2	up	down	down
mmu-miR-3072-3p	NONMMUG072266.1	Nsf	up	down	down
mmu-miR-3097-5p	NONMMUG072266.1	Nsf	up	down	down
mmu-miR-3082-5p	NONMMUG082891.1	Clec16a	up	down	down
mmu-miR-139-3p	NONMMUG067038.1	Lrrn2	up	down	down
mmu-miR-196a-5p	NONMMUG067038.1	Lrrn2	up	down	down
mmu-miR-3072-3p	NONMMUG067038.1	Lrrn2	up	down	down
mmu-miR-3082-5p	NONMMUG067038.1	Lrrn2	up	down	down
mmu-miR-3097-5p	NONMMUG067038.1	Lrrn2	up	down	down
mmu-miR-380-5p	NONMMUG067038.1	Lrrn2	up	down	down
mmu-miR-483-3p	NONMMUG067038.1	Lrrn2	up	down	down
mmu-miR-6946-5p	NONMMUG067038.1	Lrrn2	up	down	down
mmu-miR-7073-5p	NONMMUG067038.1	Lrrn2	up	down	down
mmu-miR-7091-5p	NONMMUG067038.1	Lrrn2	up	down	down
mmu-miR-7092-5p	NONMMUG067038.1	Lrrn2	up	down	down
mmu-miR-7240-5p	NONMMUG067038.1	Lrrn2	up	down	down
mmu-miR-7688-5p	NONMMUG067038.1	Lrrn2	up	down	down
mmu-miR-7b-5p	NONMMUG067038.1	Lrrn2	up	down	down
mmu-miR-139-3p	NONMMUG073989.1	Reps2	up	down	down
mmu-miR-196a-5p	NONMMUG073989.1	Reps2	up	down	down
mmu-miR-3072-3p	NONMMUG073989.1	Reps2	up	down	down
mmu-miR-3082-5p	NONMMUG073989.1	Reps2	up	down	down
mmu-miR-3097-5p	NONMMUG073989.1	Reps2	up	down	down
mmu-miR-380-5p	NONMMUG073989.1	Reps2	up	down	down
mmu-miR-7079-3p	NONMMUG073989.1	Reps2	up	down	down
mmu-miR-7688-5p	NONMMUG073989.1	Reps2	up	down	down
mmu-miR-139-3p	NONMMUG039342.2	Reps2	up	down	down
mmu-miR-196a-5p	NONMMUG039342.2	Reps2	up	down	down
mmu-miR-3072-3p	NONMMUG039342.2	Reps2	up	down	down
mmu-miR-3082-5p	NONMMUG039342.2	Reps2	up	down	down
mmu-miR-3097-5p	NONMMUG039342.2	Reps2	up	down	down
mmu-miR-7073-5p	NONMMUG039342.2	Reps2	up	down	down
mmu-miR-7079-3p	NONMMUG039342.2	Reps2	up	down	down
mmu-miR-7688-5p	NONMMUG039342.2	Reps2	up	down	down
mmu-miR-196a-5p	NONMMUG016916.2	Reps2	up	down	down
mmu-miR-3082-5p	NONMMUG016916.2	Reps2	up	down	down
mmu-miR-3097-5p	NONMMUG016916.2	Reps2	up	down	down
mmu-miR-7079-3p	NONMMUG016916.2	Reps2	up	down	down
mmu-miR-7092-5p	NONMMUG016916.2	Reps2	up	down	down
mmu-miR-7688-5p	NONMMUG016916.2	Reps2	up	down	down
mmu-miR-206-3p	NONMMUG025556.2	Apbb2	up	down	down
mmu-miR-3082-5p	NONMMUG025556.2	Apbb2	up	down	down
mmu-miR-7079-3p	NONMMUG025556.2	Apbb2	up	down	down
mmu-miR-135a-5p	NONMMUG020761.3	Cops7a	down	up	up
mmu-miR-449c-5p	NONMMUG020761.3	Cops7a	down	up	up
mmu-miR-7667-5p	NONMMUG020761.3	Cops7a	down	up	up
mmu-miR-139-3p	NONMMUG046321.2	Jarid2	up	down	down
mmu-miR-147-5p	NONMMUG046321.2	Jarid2	up	down	down
mmu-miR-3072-3p	NONMMUG046321.2	Jarid2	up	down	down
mmu-miR-3082-5p	NONMMUG046321.2	Jarid2	up	down	down
mmu-miR-380-5p	NONMMUG046321.2	Jarid2	up	down	down
mmu-miR-483-3p	NONMMUG046321.2	Jarid2	up	down	down
mmu-miR-7079-3p	NONMMUG046321.2	Jarid2	up	down	down
mmu-miR-7091-5p	NONMMUG046321.2	Jarid2	up	down	down
mmu-miR-7092-5p	NONMMUG046321.2	Jarid2	up	down	down
mmu-miR-7240-5p	NONMMUG046321.2	Jarid2	up	down	down
mmu-miR-7b-5p	NONMMUG046321.2	Jarid2	up	down	down
mmu-miR-139-3p	NONMMUG041359.2	Apol11b	up	down	down
mmu-miR-3072-3p	NONMMUG041359.2	Apol11b	up	down	down
mmu-miR-3097-5p	NONMMUG041359.2	Apol11b	up	down	down
mmu-miR-3099-3p	NONMMUG041359.2	Apol11b	up	down	down
mmu-miR-380-5p	NONMMUG041359.2	Apol11b	up	down	down
mmu-miR-6946-5p	NONMMUG041359.2	Apol11b	up	down	down
mmu-miR-7073-5p	NONMMUG041359.2	Apol11b	up	down	down
mmu-miR-7079-3p	NONMMUG041359.2	Apol11b	up	down	down
mmu-miR-7091-5p	NONMMUG041359.2	Apol11b	up	down	down
mmu-miR-7240-5p	NONMMUG041359.2	Apol11b	up	down	down
mmu-miR-7688-5p	NONMMUG041359.2	Apol11b	up	down	down
mmu-miR-7b-5p	NONMMUG041359.2	Apol11b	up	down	down
mmu-miR-129-5p	NONMMUG043419.2	Dcdc2b	down	up	up
mmu-miR-135a-5p	NONMMUG043419.2	Dcdc2b	down	up	up
mmu-miR-146b-3p	NONMMUG043419.2	Dcdc2b	down	up	up
mmu-miR-146b-5p	NONMMUG043419.2	Dcdc2b	down	up	up
mmu-miR-449a-3p	NONMMUG043419.2	Dcdc2b	down	up	up
mmu-miR-449c-5p	NONMMUG043419.2	Dcdc2b	down	up	up
mmu-miR-466i-3p	NONMMUG043419.2	Dcdc2b	down	up	up
mmu-miR-5615-3p	NONMMUG043419.2	Dcdc2b	down	up	up
mmu-miR-7667-5p	NONMMUG043419.2	Dcdc2b	down	up	up
mmu-miR-8103	NONMMUG043419.2	Dcdc2b	down	up	up
mmu-miR-935	NONMMUG043419.2	Dcdc2b	down	up	up
mmu-miR-139-3p	NONMMUG061537.1	Rbpms	up	down	down
mmu-miR-196a-5p	NONMMUG061537.1	Rbpms	up	down	down
mmu-miR-3082-5p	NONMMUG061537.1	Rbpms	up	down	down
mmu-miR-3097-5p	NONMMUG061537.1	Rbpms	up	down	down
mmu-miR-380-5p	NONMMUG061537.1	Rbpms	up	down	down
mmu-miR-483-3p	NONMMUG061537.1	Rbpms	up	down	down
mmu-miR-6946-5p	NONMMUG061537.1	Rbpms	up	down	down
mmu-miR-7073-5p	NONMMUG061537.1	Rbpms	up	down	down
mmu-miR-7688-5p	NONMMUG061537.1	Rbpms	up	down	down
mmu-miR-139-3p	NONMMUG072233.1	Rbpms	up	down	down
mmu-miR-196a-5p	NONMMUG072233.1	Rbpms	up	down	down
mmu-miR-3082-5p	NONMMUG072233.1	Rbpms	up	down	down
mmu-miR-3097-5p	NONMMUG072233.1	Rbpms	up	down	down
mmu-miR-380-5p	NONMMUG072233.1	Rbpms	up	down	down
mmu-miR-483-3p	NONMMUG072233.1	Rbpms	up	down	down
mmu-miR-6946-5p	NONMMUG072233.1	Rbpms	up	down	down
mmu-miR-7073-5p	NONMMUG072233.1	Rbpms	up	down	down
mmu-miR-7688-5p	NONMMUG072233.1	Rbpms	up	down	down
mmu-miR-139-3p	NONMMUG016489.2	Rbpms	up	down	down
mmu-miR-196a-5p	NONMMUG016489.2	Rbpms	up	down	down
mmu-miR-3082-5p	NONMMUG016489.2	Rbpms	up	down	down
mmu-miR-3097-5p	NONMMUG016489.2	Rbpms	up	down	down
mmu-miR-380-5p	NONMMUG016489.2	Rbpms	up	down	down
mmu-miR-483-3p	NONMMUG016489.2	Rbpms	up	down	down
mmu-miR-6946-5p	NONMMUG016489.2	Rbpms	up	down	down
mmu-miR-7073-5p	NONMMUG016489.2	Rbpms	up	down	down
mmu-miR-7688-5p	NONMMUG016489.2	Rbpms	up	down	down
mmu-miR-135a-5p	NONMMUG022439.2	Ifitm2	down	up	up
mmu-miR-466m-3p	NONMMUG022439.2	Ifitm2	down	up	up
mmu-miR-7667-5p	NONMMUG022439.2	Ifitm2	down	up	up
mmu-miR-139-3p	NONMMUG067038.1	Cacnb1	up	down	down
mmu-miR-196a-5p	NONMMUG067038.1	Cacnb1	up	down	down
mmu-miR-3072-3p	NONMMUG067038.1	Cacnb1	up	down	down
mmu-miR-3082-5p	NONMMUG067038.1	Cacnb1	up	down	down
mmu-miR-3097-5p	NONMMUG067038.1	Cacnb1	up	down	down
mmu-miR-3099-3p	NONMMUG067038.1	Cacnb1	up	down	down
mmu-miR-380-5p	NONMMUG067038.1	Cacnb1	up	down	down
mmu-miR-483-3p	NONMMUG067038.1	Cacnb1	up	down	down
mmu-miR-6946-5p	NONMMUG067038.1	Cacnb1	up	down	down
mmu-miR-7073-5p	NONMMUG067038.1	Cacnb1	up	down	down
mmu-miR-7091-5p	NONMMUG067038.1	Cacnb1	up	down	down
mmu-miR-7092-5p	NONMMUG067038.1	Cacnb1	up	down	down
mmu-miR-7240-5p	NONMMUG067038.1	Cacnb1	up	down	down
mmu-miR-7688-5p	NONMMUG067038.1	Cacnb1	up	down	down
mmu-miR-7b-5p	NONMMUG067038.1	Cacnb1	up	down	down
mmu-miR-129-5p	NONMMUG093843.1	Serpina3i	down	up	up
mmu-miR-135a-5p	NONMMUG093843.1	Serpina3i	down	up	up
mmu-miR-146b-3p	NONMMUG093843.1	Serpina3i	down	up	up
mmu-miR-146b-5p	NONMMUG093843.1	Serpina3i	down	up	up
mmu-miR-28b	NONMMUG093843.1	Serpina3i	down	up	up
mmu-miR-449a-3p	NONMMUG093843.1	Serpina3i	down	up	up
mmu-miR-5615-3p	NONMMUG093843.1	Serpina3i	down	up	up
mmu-miR-8103	NONMMUG093843.1	Serpina3i	down	up	up
mmu-miR-935	NONMMUG093843.1	Serpina3i	down	up	up
mmu-miR-1948-5p	NONMMUG005081.2	Appl2	down	up	up
mmu-miR-466i-3p	NONMMUG005081.2	Appl2	down	up	up
mmu-miR-489-3p	NONMMUG005081.2	Appl2	down	up	up
mmu-miR-8103	NONMMUG005081.2	Appl2	down	up	up
mmu-miR-129-5p	NONMMUG053324.1	Uggt2	down	up	up
mmu-miR-28b	NONMMUG053324.1	Uggt2	down	up	up
mmu-miR-466i-3p	NONMMUG053324.1	Uggt2	down	up	up
mmu-miR-8103	NONMMUG053324.1	Uggt2	down	up	up
mmu-miR-129-5p	NONMMUG054741.2	Uggt2	down	up	up
mmu-miR-146b-3p	NONMMUG054741.2	Uggt2	down	up	up
mmu-miR-28b	NONMMUG054741.2	Uggt2	down	up	up
mmu-miR-466i-3p	NONMMUG054741.2	Uggt2	down	up	up
mmu-miR-8103	NONMMUG054741.2	Uggt2	down	up	up
mmu-miR-466m-3p	NONMMUG009319.2	Leng8	down	up	up
mmu-miR-3072-3p	NONMMUG089572.1	Rfc2	up	down	down
mmu-miR-3082-5p	NONMMUG089572.1	Rfc2	up	down	down
mmu-miR-483-3p	NONMMUG089572.1	Rfc2	up	down	down
mmu-miR-7079-3p	NONMMUG089572.1	Rfc2	up	down	down
mmu-miR-7092-5p	NONMMUG089572.1	Rfc2	up	down	down
mmu-miR-7240-5p	NONMMUG089572.1	Rfc2	up	down	down
mmu-miR-7b-5p	NONMMUG089572.1	Rfc2	up	down	down
mmu-miR-139-3p	NONMMUG057069.1	Spg7	up	down	down
mmu-miR-196a-5p	NONMMUG057069.1	Spg7	up	down	down
mmu-miR-3072-3p	NONMMUG057069.1	Spg7	up	down	down
mmu-miR-3082-5p	NONMMUG057069.1	Spg7	up	down	down
mmu-miR-3097-5p	NONMMUG057069.1	Spg7	up	down	down
mmu-miR-380-5p	NONMMUG057069.1	Spg7	up	down	down
mmu-miR-483-3p	NONMMUG057069.1	Spg7	up	down	down
mmu-miR-6946-5p	NONMMUG057069.1	Spg7	up	down	down
mmu-miR-7073-5p	NONMMUG057069.1	Spg7	up	down	down
mmu-miR-7079-3p	NONMMUG057069.1	Spg7	up	down	down
mmu-miR-7091-5p	NONMMUG057069.1	Spg7	up	down	down
mmu-miR-7092-5p	NONMMUG057069.1	Spg7	up	down	down
mmu-miR-7688-5p	NONMMUG057069.1	Spg7	up	down	down
mmu-miR-7b-5p	NONMMUG057069.1	Spg7	up	down	down
mmu-miR-1933-3p	NONMMUG045868.2	Gpx1	up	down	down
mmu-miR-3097-5p	NONMMUG045868.2	Gpx1	up	down	down
mmu-miR-6946-5p	NONMMUG045868.2	Gpx1	up	down	down
mmu-miR-7073-5p	NONMMUG045868.2	Gpx1	up	down	down
mmu-miR-7688-5p	NONMMUG045868.2	Gpx1	up	down	down
mmu-miR-7b-5p	NONMMUG045868.2	Gpx1	up	down	down
mmu-miR-139-3p	NONMMUG036531.2	Rnaset2b	up	down	down
mmu-miR-196a-5p	NONMMUG036531.2	Rnaset2b	up	down	down
mmu-miR-3072-3p	NONMMUG036531.2	Rnaset2b	up	down	down
mmu-miR-3082-5p	NONMMUG036531.2	Rnaset2b	up	down	down
mmu-miR-3097-5p	NONMMUG036531.2	Rnaset2b	up	down	down
mmu-miR-3099-3p	NONMMUG036531.2	Rnaset2b	up	down	down
mmu-miR-380-5p	NONMMUG036531.2	Rnaset2b	up	down	down
mmu-miR-6946-5p	NONMMUG036531.2	Rnaset2b	up	down	down
mmu-miR-7073-5p	NONMMUG036531.2	Rnaset2b	up	down	down
mmu-miR-7079-3p	NONMMUG036531.2	Rnaset2b	up	down	down
mmu-miR-7091-5p	NONMMUG036531.2	Rnaset2b	up	down	down
mmu-miR-7240-5p	NONMMUG036531.2	Rnaset2b	up	down	down
mmu-miR-7688-5p	NONMMUG036531.2	Rnaset2b	up	down	down
mmu-miR-7b-5p	NONMMUG036531.2	Rnaset2b	up	down	down
mmu-miR-139-3p	NONMMUG093329.1	Rnaset2b	up	down	down
mmu-miR-196a-5p	NONMMUG093329.1	Rnaset2b	up	down	down
mmu-miR-3072-3p	NONMMUG093329.1	Rnaset2b	up	down	down
mmu-miR-3082-5p	NONMMUG093329.1	Rnaset2b	up	down	down
mmu-miR-3097-5p	NONMMUG093329.1	Rnaset2b	up	down	down
mmu-miR-3099-3p	NONMMUG093329.1	Rnaset2b	up	down	down
mmu-miR-380-5p	NONMMUG093329.1	Rnaset2b	up	down	down
mmu-miR-6946-5p	NONMMUG093329.1	Rnaset2b	up	down	down
mmu-miR-7073-5p	NONMMUG093329.1	Rnaset2b	up	down	down
mmu-miR-7079-3p	NONMMUG093329.1	Rnaset2b	up	down	down
mmu-miR-7091-5p	NONMMUG093329.1	Rnaset2b	up	down	down
mmu-miR-7240-5p	NONMMUG093329.1	Rnaset2b	up	down	down
mmu-miR-7688-5p	NONMMUG093329.1	Rnaset2b	up	down	down
mmu-miR-7b-5p	NONMMUG093329.1	Rnaset2b	up	down	down
mmu-miR-139-3p	NONMMUG082898.1	Rnaset2b	up	down	down
mmu-miR-196a-5p	NONMMUG082898.1	Rnaset2b	up	down	down
mmu-miR-3072-3p	NONMMUG082898.1	Rnaset2b	up	down	down
mmu-miR-3082-5p	NONMMUG082898.1	Rnaset2b	up	down	down
mmu-miR-3097-5p	NONMMUG082898.1	Rnaset2b	up	down	down
mmu-miR-3099-3p	NONMMUG082898.1	Rnaset2b	up	down	down
mmu-miR-380-5p	NONMMUG082898.1	Rnaset2b	up	down	down
mmu-miR-6946-5p	NONMMUG082898.1	Rnaset2b	up	down	down
mmu-miR-7073-5p	NONMMUG082898.1	Rnaset2b	up	down	down
mmu-miR-7079-3p	NONMMUG082898.1	Rnaset2b	up	down	down
mmu-miR-7091-5p	NONMMUG082898.1	Rnaset2b	up	down	down
mmu-miR-7240-5p	NONMMUG082898.1	Rnaset2b	up	down	down
mmu-miR-7688-5p	NONMMUG082898.1	Rnaset2b	up	down	down
mmu-miR-7b-5p	NONMMUG082898.1	Rnaset2b	up	down	down
mmu-miR-139-3p	NONMMUG061465.1	Rnaset2b	up	down	down
mmu-miR-196a-5p	NONMMUG061465.1	Rnaset2b	up	down	down
mmu-miR-3072-3p	NONMMUG061465.1	Rnaset2b	up	down	down
mmu-miR-3082-5p	NONMMUG061465.1	Rnaset2b	up	down	down
mmu-miR-3097-5p	NONMMUG061465.1	Rnaset2b	up	down	down
mmu-miR-3099-3p	NONMMUG061465.1	Rnaset2b	up	down	down
mmu-miR-380-5p	NONMMUG061465.1	Rnaset2b	up	down	down
mmu-miR-6946-5p	NONMMUG061465.1	Rnaset2b	up	down	down
mmu-miR-7073-5p	NONMMUG061465.1	Rnaset2b	up	down	down
mmu-miR-7079-3p	NONMMUG061465.1	Rnaset2b	up	down	down
mmu-miR-7091-5p	NONMMUG061465.1	Rnaset2b	up	down	down
mmu-miR-7240-5p	NONMMUG061465.1	Rnaset2b	up	down	down
mmu-miR-7688-5p	NONMMUG061465.1	Rnaset2b	up	down	down
mmu-miR-7b-5p	NONMMUG061465.1	Rnaset2b	up	down	down
mmu-miR-139-3p	NONMMUG028056.2	Rnaset2b	up	down	down
mmu-miR-196a-5p	NONMMUG028056.2	Rnaset2b	up	down	down
mmu-miR-3072-3p	NONMMUG028056.2	Rnaset2b	up	down	down
mmu-miR-3082-5p	NONMMUG028056.2	Rnaset2b	up	down	down
mmu-miR-3097-5p	NONMMUG028056.2	Rnaset2b	up	down	down
mmu-miR-3099-3p	NONMMUG028056.2	Rnaset2b	up	down	down
mmu-miR-380-5p	NONMMUG028056.2	Rnaset2b	up	down	down
mmu-miR-6946-5p	NONMMUG028056.2	Rnaset2b	up	down	down
mmu-miR-7073-5p	NONMMUG028056.2	Rnaset2b	up	down	down
mmu-miR-7079-3p	NONMMUG028056.2	Rnaset2b	up	down	down
mmu-miR-7091-5p	NONMMUG028056.2	Rnaset2b	up	down	down
mmu-miR-7240-5p	NONMMUG028056.2	Rnaset2b	up	down	down
mmu-miR-7688-5p	NONMMUG028056.2	Rnaset2b	up	down	down
mmu-miR-7b-5p	NONMMUG028056.2	Rnaset2b	up	down	down
mmu-miR-3082-5p	NONMMUG023340.2	Itga1	up	down	down
mmu-miR-7079-3p	NONMMUG023340.2	Itga1	up	down	down
mmu-miR-3082-5p	NONMMUG059201.1	Itga1	up	down	down
mmu-miR-3097-5p	NONMMUG059201.1	Itga1	up	down	down
mmu-miR-7079-3p	NONMMUG059201.1	Itga1	up	down	down
mmu-miR-466i-3p	NONMMUG085555.1	Ncor2	down	up	up
mmu-miR-8103	NONMMUG085555.1	Ncor2	down	up	up
mmu-miR-466i-3p	NONMMUG086700.1	Ncor2	down	up	up
mmu-miR-8103	NONMMUG086700.1	Ncor2	down	up	up
mmu-miR-146b-3p	NONMMUG030332.2	Fkbp8	down	up	up
mmu-miR-146b-5p	NONMMUG030332.2	Fkbp8	down	up	up
mmu-miR-449a-3p	NONMMUG030332.2	Fkbp8	down	up	up
mmu-miR-466i-3p	NONMMUG030332.2	Fkbp8	down	up	up
mmu-miR-5615-3p	NONMMUG030332.2	Fkbp8	down	up	up
mmu-miR-7033-5p	NONMMUG030332.2	Fkbp8	down	up	up
mmu-miR-129-5p	NONMMUG046384.2	Fkbp8	down	up	up
mmu-miR-146b-3p	NONMMUG046384.2	Fkbp8	down	up	up
mmu-miR-146b-5p	NONMMUG046384.2	Fkbp8	down	up	up
mmu-miR-449a-3p	NONMMUG046384.2	Fkbp8	down	up	up
mmu-miR-466i-3p	NONMMUG046384.2	Fkbp8	down	up	up
mmu-miR-5615-3p	NONMMUG046384.2	Fkbp8	down	up	up
mmu-miR-7033-5p	NONMMUG046384.2	Fkbp8	down	up	up
mmu-miR-129-5p	NONMMUG028231.2	Tubd1	down	up	up
mmu-miR-135a-5p	NONMMUG028231.2	Tubd1	down	up	up
mmu-miR-146b-3p	NONMMUG028231.2	Tubd1	down	up	up
mmu-miR-449a-3p	NONMMUG028231.2	Tubd1	down	up	up
mmu-miR-466i-3p	NONMMUG028231.2	Tubd1	down	up	up
mmu-miR-7667-5p	NONMMUG028231.2	Tubd1	down	up	up
mmu-miR-8103	NONMMUG028231.2	Tubd1	down	up	up
mmu-miR-935	NONMMUG028231.2	Tubd1	down	up	up
mmu-miR-129-5p	NONMMUG089376.1	Tubd1	down	up	up
mmu-miR-135a-5p	NONMMUG089376.1	Tubd1	down	up	up
mmu-miR-146b-3p	NONMMUG089376.1	Tubd1	down	up	up
mmu-miR-449a-3p	NONMMUG089376.1	Tubd1	down	up	up
mmu-miR-466i-3p	NONMMUG089376.1	Tubd1	down	up	up
mmu-miR-7667-5p	NONMMUG089376.1	Tubd1	down	up	up
mmu-miR-8103	NONMMUG089376.1	Tubd1	down	up	up
mmu-miR-935	NONMMUG089376.1	Tubd1	down	up	up
mmu-miR-28b	NONMMUG005660.2	Pan3	down	up	up
mmu-miR-466i-3p	NONMMUG005660.2	Pan3	down	up	up
mmu-miR-8103	NONMMUG005660.2	Pan3	down	up	up
mmu-miR-196a-5p	NONMMUG024797.2	Blvra	up	down	down
mmu-miR-3072-3p	NONMMUG024797.2	Blvra	up	down	down
mmu-miR-3082-5p	NONMMUG024797.2	Blvra	up	down	down
mmu-miR-3097-5p	NONMMUG024797.2	Blvra	up	down	down
mmu-miR-135a-5p	NONMMUG020761.3	Ptprb	down	up	up
mmu-miR-449c-5p	NONMMUG020761.3	Ptprb	down	up	up
mmu-miR-7667-5p	NONMMUG020761.3	Ptprb	down	up	up
mmu-miR-139-3p	NONMMUG061303.1	Bank1	up	down	down
mmu-miR-3072-3p	NONMMUG061303.1	Bank1	up	down	down
mmu-miR-3082-5p	NONMMUG061303.1	Bank1	up	down	down
mmu-miR-3097-5p	NONMMUG061303.1	Bank1	up	down	down
mmu-miR-380-5p	NONMMUG061303.1	Bank1	up	down	down
mmu-miR-483-3p	NONMMUG061303.1	Bank1	up	down	down
mmu-miR-6946-5p	NONMMUG061303.1	Bank1	up	down	down
mmu-miR-7073-5p	NONMMUG061303.1	Bank1	up	down	down
mmu-miR-7079-3p	NONMMUG061303.1	Bank1	up	down	down
mmu-miR-7091-5p	NONMMUG061303.1	Bank1	up	down	down
mmu-miR-7092-5p	NONMMUG061303.1	Bank1	up	down	down
mmu-miR-7240-5p	NONMMUG061303.1	Bank1	up	down	down
mmu-miR-7688-5p	NONMMUG061303.1	Bank1	up	down	down
mmu-miR-7b-5p	NONMMUG061303.1	Bank1	up	down	down
mmu-miR-3072-3p	NONMMUG001656.2	Ncoa3	up	down	down
mmu-miR-3082-5p	NONMMUG001656.2	Ncoa3	up	down	down
mmu-miR-3097-5p	NONMMUG001656.2	Ncoa3	up	down	down
mmu-miR-7079-3p	NONMMUG001656.2	Ncoa3	up	down	down
mmu-miR-7240-5p	NONMMUG001656.2	Ncoa3	up	down	down
mmu-miR-139-3p	NONMMUG035780.2	Greb1	up	down	down
mmu-miR-196a-5p	NONMMUG035780.2	Greb1	up	down	down
mmu-miR-3072-3p	NONMMUG035780.2	Greb1	up	down	down
mmu-miR-3082-5p	NONMMUG035780.2	Greb1	up	down	down
mmu-miR-3097-5p	NONMMUG035780.2	Greb1	up	down	down
mmu-miR-3099-3p	NONMMUG035780.2	Greb1	up	down	down
mmu-miR-380-5p	NONMMUG035780.2	Greb1	up	down	down
mmu-miR-483-3p	NONMMUG035780.2	Greb1	up	down	down
mmu-miR-6946-5p	NONMMUG035780.2	Greb1	up	down	down
mmu-miR-7073-5p	NONMMUG035780.2	Greb1	up	down	down
mmu-miR-7079-3p	NONMMUG035780.2	Greb1	up	down	down
mmu-miR-7091-5p	NONMMUG035780.2	Greb1	up	down	down
mmu-miR-7092-5p	NONMMUG035780.2	Greb1	up	down	down
mmu-miR-7240-5p	NONMMUG035780.2	Greb1	up	down	down
mmu-miR-7688-5p	NONMMUG035780.2	Greb1	up	down	down
mmu-miR-7b-5p	NONMMUG035780.2	Greb1	up	down	down
mmu-miR-466i-3p	NONMMUG041497.2	Babam2	down	up	up
mmu-miR-8103	NONMMUG041497.2	Babam2	down	up	up
mmu-miR-466i-3p	NONMMUG035386.2	Babam2	down	up	up
mmu-miR-8103	NONMMUG035386.2	Babam2	down	up	up
mmu-miR-466i-3p	NONMMUG052082.1	Babam2	down	up	up
mmu-miR-8103	NONMMUG052082.1	Babam2	down	up	up
mmu-miR-3072-3p	NONMMUG020158.2	Proser1	up	down	down
mmu-miR-3082-5p	NONMMUG020158.2	Proser1	up	down	down
mmu-miR-7079-3p	NONMMUG020158.2	Proser1	up	down	down
mmu-miR-129-5p	NONMMUG053324.1	Lilr4b	down	up	up
mmu-miR-28b	NONMMUG053324.1	Lilr4b	down	up	up
mmu-miR-466i-3p	NONMMUG053324.1	Lilr4b	down	up	up
mmu-miR-8103	NONMMUG053324.1	Lilr4b	down	up	up
mmu-miR-466i-3p	NONMMUG077213.1	Tcf3	down	up	up
mmu-miR-466i-3p	NONMMUG077181.1	Tcf3	down	up	up
mmu-miR-129-5p	NONMMUG000830.2	Pkd1	down	up	up
mmu-miR-135a-5p	NONMMUG000830.2	Pkd1	down	up	up
mmu-miR-466i-3p	NONMMUG000830.2	Pkd1	down	up	up
mmu-miR-7667-5p	NONMMUG000830.2	Pkd1	down	up	up
mmu-miR-8103	NONMMUG000830.2	Pkd1	down	up	up
mmu-miR-129-5p	NONMMUG012186.2	Pkd1	down	up	up
mmu-miR-135a-5p	NONMMUG012186.2	Pkd1	down	up	up
mmu-miR-466i-3p	NONMMUG012186.2	Pkd1	down	up	up
mmu-miR-7667-5p	NONMMUG012186.2	Pkd1	down	up	up
mmu-miR-8103	NONMMUG012186.2	Pkd1	down	up	up
mmu-miR-129-5p	NONMMUG039285.2	Pkd1	down	up	up
mmu-miR-135a-5p	NONMMUG039285.2	Pkd1	down	up	up
mmu-miR-146b-3p	NONMMUG039285.2	Pkd1	down	up	up
mmu-miR-1948-5p	NONMMUG039285.2	Pkd1	down	up	up
mmu-miR-466i-3p	NONMMUG039285.2	Pkd1	down	up	up
mmu-miR-7667-5p	NONMMUG039285.2	Pkd1	down	up	up
mmu-miR-8103	NONMMUG039285.2	Pkd1	down	up	up
mmu-miR-129-5p	NONMMUG067820.1	Pkd1	down	up	up
mmu-miR-146b-3p	NONMMUG067820.1	Pkd1	down	up	up
mmu-miR-1948-5p	NONMMUG067820.1	Pkd1	down	up	up
mmu-miR-466i-3p	NONMMUG067820.1	Pkd1	down	up	up
mmu-miR-8103	NONMMUG067820.1	Pkd1	down	up	up
mmu-miR-129-5p	NONMMUG043419.2	Spink5	down	up	up
mmu-miR-135a-5p	NONMMUG043419.2	Spink5	down	up	up
mmu-miR-146b-3p	NONMMUG043419.2	Spink5	down	up	up
mmu-miR-146b-5p	NONMMUG043419.2	Spink5	down	up	up
mmu-miR-449a-3p	NONMMUG043419.2	Spink5	down	up	up
mmu-miR-449c-5p	NONMMUG043419.2	Spink5	down	up	up
mmu-miR-466i-3p	NONMMUG043419.2	Spink5	down	up	up
mmu-miR-5615-3p	NONMMUG043419.2	Spink5	down	up	up
mmu-miR-7667-5p	NONMMUG043419.2	Spink5	down	up	up
mmu-miR-8103	NONMMUG043419.2	Spink5	down	up	up
mmu-miR-935	NONMMUG043419.2	Spink5	down	up	up
mmu-miR-129-5p	NONMMUG066722.1	Zcchc4	down	up	up
mmu-miR-146b-3p	NONMMUG066722.1	Zcchc4	down	up	up
mmu-miR-146b-5p	NONMMUG066722.1	Zcchc4	down	up	up
mmu-miR-1956	NONMMUG066722.1	Zcchc4	down	up	up
mmu-miR-28b	NONMMUG066722.1	Zcchc4	down	up	up
mmu-miR-449a-3p	NONMMUG066722.1	Zcchc4	down	up	up
mmu-miR-466i-3p	NONMMUG066722.1	Zcchc4	down	up	up
mmu-miR-5615-3p	NONMMUG066722.1	Zcchc4	down	up	up
mmu-miR-7033-5p	NONMMUG066722.1	Zcchc4	down	up	up
mmu-miR-881-3p	NONMMUG066722.1	Zcchc4	down	up	up
mmu-miR-935	NONMMUG066722.1	Zcchc4	down	up	up
mmu-miR-139-3p	NONMMUG035780.2	Adamts1	up	down	down
mmu-miR-196a-5p	NONMMUG035780.2	Adamts1	up	down	down
mmu-miR-3072-3p	NONMMUG035780.2	Adamts1	up	down	down
mmu-miR-3082-5p	NONMMUG035780.2	Adamts1	up	down	down
mmu-miR-3097-5p	NONMMUG035780.2	Adamts1	up	down	down
mmu-miR-3099-3p	NONMMUG035780.2	Adamts1	up	down	down
mmu-miR-380-5p	NONMMUG035780.2	Adamts1	up	down	down
mmu-miR-483-3p	NONMMUG035780.2	Adamts1	up	down	down
mmu-miR-6946-5p	NONMMUG035780.2	Adamts1	up	down	down
mmu-miR-7073-5p	NONMMUG035780.2	Adamts1	up	down	down
mmu-miR-7079-3p	NONMMUG035780.2	Adamts1	up	down	down
mmu-miR-7091-5p	NONMMUG035780.2	Adamts1	up	down	down
mmu-miR-7092-5p	NONMMUG035780.2	Adamts1	up	down	down
mmu-miR-7240-5p	NONMMUG035780.2	Adamts1	up	down	down
mmu-miR-7688-5p	NONMMUG035780.2	Adamts1	up	down	down
mmu-miR-7b-5p	NONMMUG035780.2	Adamts1	up	down	down
mmu-miR-139-3p	NONMMUG076892.1	Adamts1	up	down	down
mmu-miR-3072-3p	NONMMUG076892.1	Adamts1	up	down	down
mmu-miR-3082-5p	NONMMUG076892.1	Adamts1	up	down	down
mmu-miR-3097-5p	NONMMUG076892.1	Adamts1	up	down	down
mmu-miR-3099-3p	NONMMUG076892.1	Adamts1	up	down	down
mmu-miR-380-5p	NONMMUG076892.1	Adamts1	up	down	down
mmu-miR-483-3p	NONMMUG076892.1	Adamts1	up	down	down
mmu-miR-6946-5p	NONMMUG076892.1	Adamts1	up	down	down
mmu-miR-7073-5p	NONMMUG076892.1	Adamts1	up	down	down
mmu-miR-7079-3p	NONMMUG076892.1	Adamts1	up	down	down
mmu-miR-7091-5p	NONMMUG076892.1	Adamts1	up	down	down
mmu-miR-7092-5p	NONMMUG076892.1	Adamts1	up	down	down
mmu-miR-7240-5p	NONMMUG076892.1	Adamts1	up	down	down
mmu-miR-7688-5p	NONMMUG076892.1	Adamts1	up	down	down
mmu-miR-7b-5p	NONMMUG076892.1	Adamts1	up	down	down
mmu-miR-139-3p	NONMMUG028056.2	Adamts1	up	down	down
mmu-miR-196a-5p	NONMMUG028056.2	Adamts1	up	down	down
mmu-miR-3072-3p	NONMMUG028056.2	Adamts1	up	down	down
mmu-miR-3082-5p	NONMMUG028056.2	Adamts1	up	down	down
mmu-miR-3097-5p	NONMMUG028056.2	Adamts1	up	down	down
mmu-miR-3099-3p	NONMMUG028056.2	Adamts1	up	down	down
mmu-miR-380-5p	NONMMUG028056.2	Adamts1	up	down	down
mmu-miR-6946-5p	NONMMUG028056.2	Adamts1	up	down	down
mmu-miR-7073-5p	NONMMUG028056.2	Adamts1	up	down	down
mmu-miR-7079-3p	NONMMUG028056.2	Adamts1	up	down	down
mmu-miR-7091-5p	NONMMUG028056.2	Adamts1	up	down	down
mmu-miR-7240-5p	NONMMUG028056.2	Adamts1	up	down	down
mmu-miR-7688-5p	NONMMUG028056.2	Adamts1	up	down	down
mmu-miR-7b-5p	NONMMUG028056.2	Adamts1	up	down	down
mmu-miR-129-5p	NONMMUG047381.1	Stfa2	down	up	up
mmu-miR-28b	NONMMUG047381.1	Stfa2	down	up	up
mmu-miR-8103	NONMMUG047381.1	Stfa2	down	up	up
mmu-miR-139-3p	NONMMUG007421.2	Tm6sf1	up	down	down
mmu-miR-1933-3p	NONMMUG007421.2	Tm6sf1	up	down	down
mmu-miR-3072-3p	NONMMUG007421.2	Tm6sf1	up	down	down
mmu-miR-3082-5p	NONMMUG007421.2	Tm6sf1	up	down	down
mmu-miR-3097-5p	NONMMUG007421.2	Tm6sf1	up	down	down
mmu-miR-380-5p	NONMMUG007421.2	Tm6sf1	up	down	down
mmu-miR-6946-5p	NONMMUG007421.2	Tm6sf1	up	down	down
mmu-miR-7073-5p	NONMMUG007421.2	Tm6sf1	up	down	down
mmu-miR-7079-3p	NONMMUG007421.2	Tm6sf1	up	down	down
mmu-miR-7688-5p	NONMMUG007421.2	Tm6sf1	up	down	down
mmu-miR-7b-5p	NONMMUG007421.2	Tm6sf1	up	down	down
mmu-miR-139-3p	NONMMUG060164.1	Ralgps1	up	down	down
mmu-miR-3097-5p	NONMMUG060164.1	Ralgps1	up	down	down
mmu-miR-3099-3p	NONMMUG060164.1	Ralgps1	up	down	down
mmu-miR-483-3p	NONMMUG060164.1	Ralgps1	up	down	down
mmu-miR-6946-5p	NONMMUG060164.1	Ralgps1	up	down	down
mmu-miR-7073-5p	NONMMUG060164.1	Ralgps1	up	down	down
mmu-miR-7688-5p	NONMMUG060164.1	Ralgps1	up	down	down
mmu-miR-7b-5p	NONMMUG060164.1	Ralgps1	up	down	down
mmu-miR-208a-3p	NONMMUG018828.2	Pomgnt1	down	up	up
mmu-miR-489-3p	NONMMUG018828.2	Pomgnt1	down	up	up
mmu-miR-3072-3p	NONMMUG039342.2	Fchsd2	up	down	down
mmu-miR-3082-5p	NONMMUG039342.2	Fchsd2	up	down	down
mmu-miR-3097-5p	NONMMUG039342.2	Fchsd2	up	down	down
mmu-miR-7079-3p	NONMMUG039342.2	Fchsd2	up	down	down
mmu-miR-3072-3p	NONMMUG036751.2	Fchsd2	up	down	down
mmu-miR-3082-5p	NONMMUG036751.2	Fchsd2	up	down	down
mmu-miR-3097-5p	NONMMUG036751.2	Fchsd2	up	down	down
mmu-miR-7079-3p	NONMMUG036751.2	Fchsd2	up	down	down
mmu-miR-3082-5p	NONMMUG016916.2	Fchsd2	up	down	down
mmu-miR-3097-5p	NONMMUG016916.2	Fchsd2	up	down	down
mmu-miR-7079-3p	NONMMUG016916.2	Fchsd2	up	down	down
mmu-miR-7092-5p	NONMMUG016916.2	Fchsd2	up	down	down
mmu-miR-3072-3p	NONMMUG059201.1	Fchsd2	up	down	down
mmu-miR-3082-5p	NONMMUG059201.1	Fchsd2	up	down	down
mmu-miR-3097-5p	NONMMUG059201.1	Fchsd2	up	down	down
mmu-miR-7079-3p	NONMMUG059201.1	Fchsd2	up	down	down
mmu-miR-129-5p	NONMMUG040815.2	H2-T23	down	up	up
mmu-miR-135a-5p	NONMMUG040815.2	H2-T23	down	up	up
mmu-miR-449c-5p	NONMMUG040815.2	H2-T23	down	up	up
mmu-miR-489-3p	NONMMUG040815.2	H2-T23	down	up	up
mmu-miR-7667-5p	NONMMUG040815.2	H2-T23	down	up	up
mmu-miR-935	NONMMUG040815.2	H2-T23	down	up	up
mmu-miR-466i-3p	NONMMUG077181.1	Serpinh1	down	up	up
mmu-miR-139-3p	NONMMUG046595.1	Ablim1	up	down	down
mmu-miR-483-3p	NONMMUG046595.1	Ablim1	up	down	down
mmu-miR-7073-5p	NONMMUG046595.1	Ablim1	up	down	down
mmu-miR-7092-5p	NONMMUG046595.1	Ablim1	up	down	down
mmu-miR-7688-5p	NONMMUG046595.1	Ablim1	up	down	down
mmu-miR-129-5p	NONMMUG054741.2	Anapc15	down	up	up
mmu-miR-146b-3p	NONMMUG054741.2	Anapc15	down	up	up
mmu-miR-28b	NONMMUG054741.2	Anapc15	down	up	up
mmu-miR-466i-3p	NONMMUG054741.2	Anapc15	down	up	up
mmu-miR-8103	NONMMUG054741.2	Anapc15	down	up	up
mmu-miR-129-5p	NONMMUG077180.1	Anapc15	down	up	up
mmu-miR-28b	NONMMUG077180.1	Anapc15	down	up	up
mmu-miR-466i-3p	NONMMUG077180.1	Anapc15	down	up	up
mmu-miR-8103	NONMMUG077180.1	Anapc15	down	up	up
mmu-miR-135a-5p	NONMMUG006459.2	Phf21a	down	up	up
mmu-miR-449c-5p	NONMMUG006459.2	Phf21a	down	up	up
mmu-miR-7667-5p	NONMMUG006459.2	Phf21a	down	up	up
mmu-miR-3082-5p	NONMMUG026066.2	Maml2	up	down	down
mmu-miR-7079-3p	NONMMUG026066.2	Maml2	up	down	down
mmu-miR-3082-5p	ENSMUSG00000110631	Maml2	up	down	down
mmu-miR-7079-3p	ENSMUSG00000110631	Maml2	up	down	down
mmu-miR-206-3p	NONMMUG032851.2	Mob1b	up	down	down
mmu-miR-3082-5p	NONMMUG032851.2	Mob1b	up	down	down
mmu-miR-3097-5p	NONMMUG032851.2	Mob1b	up	down	down
mmu-miR-7079-3p	NONMMUG032851.2	Mob1b	up	down	down
mmu-miR-7092-5p	NONMMUG032851.2	Mob1b	up	down	down
mmu-miR-3082-5p	NONMMUG007271.2	Mob1b	up	down	down
mmu-miR-3097-5p	NONMMUG007271.2	Mob1b	up	down	down
mmu-miR-7079-3p	NONMMUG007271.2	Mob1b	up	down	down
mmu-miR-7092-5p	NONMMUG007271.2	Mob1b	up	down	down
mmu-miR-206-3p	NONMMUG005878.2	Mob1b	up	down	down
mmu-miR-3082-5p	NONMMUG005878.2	Mob1b	up	down	down
mmu-miR-3097-5p	NONMMUG005878.2	Mob1b	up	down	down
mmu-miR-7079-3p	NONMMUG005878.2	Mob1b	up	down	down
mmu-miR-7092-5p	NONMMUG005878.2	Mob1b	up	down	down
mmu-miR-206-3p	NONMMUG069501.1	Mob1b	up	down	down
mmu-miR-3082-5p	NONMMUG069501.1	Mob1b	up	down	down
mmu-miR-3097-5p	NONMMUG069501.1	Mob1b	up	down	down
mmu-miR-7079-3p	NONMMUG069501.1	Mob1b	up	down	down
mmu-miR-7092-5p	NONMMUG069501.1	Mob1b	up	down	down
mmu-miR-129-5p	NONMMUG040815.2	Pltp	down	up	up
mmu-miR-135a-5p	NONMMUG040815.2	Pltp	down	up	up
mmu-miR-449c-5p	NONMMUG040815.2	Pltp	down	up	up
mmu-miR-489-3p	NONMMUG040815.2	Pltp	down	up	up
mmu-miR-7667-5p	NONMMUG040815.2	Pltp	down	up	up
mmu-miR-935	NONMMUG040815.2	Pltp	down	up	up
mmu-miR-139-3p	NONMMUG005291.2	AC175538.1	up	down	down
mmu-miR-3072-3p	NONMMUG005291.2	AC175538.1	up	down	down
mmu-miR-3082-5p	NONMMUG005291.2	AC175538.1	up	down	down
mmu-miR-380-5p	NONMMUG005291.2	AC175538.1	up	down	down
mmu-miR-483-3p	NONMMUG005291.2	AC175538.1	up	down	down
mmu-miR-7073-5p	NONMMUG005291.2	AC175538.1	up	down	down
mmu-miR-7079-3p	NONMMUG005291.2	AC175538.1	up	down	down
mmu-miR-7091-5p	NONMMUG005291.2	AC175538.1	up	down	down
mmu-miR-7092-5p	NONMMUG005291.2	AC175538.1	up	down	down
mmu-miR-7240-5p	NONMMUG005291.2	AC175538.1	up	down	down
mmu-miR-7688-5p	NONMMUG005291.2	AC175538.1	up	down	down
mmu-miR-7b-5p	NONMMUG005291.2	AC175538.1	up	down	down
mmu-miR-139-3p	NONMMUG010373.2	AC175538.1	up	down	down
mmu-miR-3072-3p	NONMMUG010373.2	AC175538.1	up	down	down
mmu-miR-3082-5p	NONMMUG010373.2	AC175538.1	up	down	down
mmu-miR-3097-5p	NONMMUG010373.2	AC175538.1	up	down	down
mmu-miR-380-5p	NONMMUG010373.2	AC175538.1	up	down	down
mmu-miR-483-3p	NONMMUG010373.2	AC175538.1	up	down	down
mmu-miR-7073-5p	NONMMUG010373.2	AC175538.1	up	down	down
mmu-miR-7079-3p	NONMMUG010373.2	AC175538.1	up	down	down
mmu-miR-7091-5p	NONMMUG010373.2	AC175538.1	up	down	down
mmu-miR-7092-5p	NONMMUG010373.2	AC175538.1	up	down	down
mmu-miR-7240-5p	NONMMUG010373.2	AC175538.1	up	down	down
mmu-miR-7688-5p	NONMMUG010373.2	AC175538.1	up	down	down
mmu-miR-7b-5p	NONMMUG010373.2	AC175538.1	up	down	down
mmu-miR-466i-3p	NONMMUG066594.1	Mtus1	down	up	up
mmu-miR-8103	NONMMUG066594.1	Mtus1	down	up	up
mmu-miR-129-5p	NONMMUG027714.2	Mtus1	down	up	up
mmu-miR-466i-3p	NONMMUG027714.2	Mtus1	down	up	up
mmu-miR-8103	NONMMUG027714.2	Mtus1	down	up	up
mmu-miR-208a-3p	NONMMUG018828.2	Zdhhc16	down	up	up
mmu-miR-489-3p	NONMMUG018828.2	Zdhhc16	down	up	up
mmu-miR-139-3p	NONMMUG067038.1	Wif1	up	down	down
mmu-miR-196a-5p	NONMMUG067038.1	Wif1	up	down	down
mmu-miR-3072-3p	NONMMUG067038.1	Wif1	up	down	down
mmu-miR-3082-5p	NONMMUG067038.1	Wif1	up	down	down
mmu-miR-3097-5p	NONMMUG067038.1	Wif1	up	down	down
mmu-miR-3099-3p	NONMMUG067038.1	Wif1	up	down	down
mmu-miR-380-5p	NONMMUG067038.1	Wif1	up	down	down
mmu-miR-483-3p	NONMMUG067038.1	Wif1	up	down	down
mmu-miR-6946-5p	NONMMUG067038.1	Wif1	up	down	down
mmu-miR-7073-5p	NONMMUG067038.1	Wif1	up	down	down
mmu-miR-7091-5p	NONMMUG067038.1	Wif1	up	down	down
mmu-miR-7092-5p	NONMMUG067038.1	Wif1	up	down	down
mmu-miR-7240-5p	NONMMUG067038.1	Wif1	up	down	down
mmu-miR-7688-5p	NONMMUG067038.1	Wif1	up	down	down
mmu-miR-7b-5p	NONMMUG067038.1	Wif1	up	down	down
mmu-miR-8103	NONMMUG020091.2	Ppp1r9a	down	up	up
mmu-miR-139-3p	NONMMUG036531.2	Zfp385b	up	down	down
mmu-miR-196a-5p	NONMMUG036531.2	Zfp385b	up	down	down
mmu-miR-3072-3p	NONMMUG036531.2	Zfp385b	up	down	down
mmu-miR-3082-5p	NONMMUG036531.2	Zfp385b	up	down	down
mmu-miR-3097-5p	NONMMUG036531.2	Zfp385b	up	down	down
mmu-miR-380-5p	NONMMUG036531.2	Zfp385b	up	down	down
mmu-miR-7073-5p	NONMMUG036531.2	Zfp385b	up	down	down
mmu-miR-7079-3p	NONMMUG036531.2	Zfp385b	up	down	down
mmu-miR-7091-5p	NONMMUG036531.2	Zfp385b	up	down	down
mmu-miR-7240-5p	NONMMUG036531.2	Zfp385b	up	down	down
mmu-miR-7688-5p	NONMMUG036531.2	Zfp385b	up	down	down
mmu-miR-7b-5p	NONMMUG036531.2	Zfp385b	up	down	down
mmu-miR-139-3p	NONMMUG032191.2	Zfp385b	up	down	down
mmu-miR-3072-3p	NONMMUG032191.2	Zfp385b	up	down	down
mmu-miR-3082-5p	NONMMUG032191.2	Zfp385b	up	down	down
mmu-miR-3097-5p	NONMMUG032191.2	Zfp385b	up	down	down
mmu-miR-380-5p	NONMMUG032191.2	Zfp385b	up	down	down
mmu-miR-7073-5p	NONMMUG032191.2	Zfp385b	up	down	down
mmu-miR-7079-3p	NONMMUG032191.2	Zfp385b	up	down	down
mmu-miR-7091-5p	NONMMUG032191.2	Zfp385b	up	down	down
mmu-miR-7092-5p	NONMMUG032191.2	Zfp385b	up	down	down
mmu-miR-7240-5p	NONMMUG032191.2	Zfp385b	up	down	down
mmu-miR-7688-5p	NONMMUG032191.2	Zfp385b	up	down	down
mmu-miR-7b-5p	NONMMUG032191.2	Zfp385b	up	down	down
mmu-miR-129-5p	NONMMUG040815.2	Ano10	down	up	up
mmu-miR-135a-5p	NONMMUG040815.2	Ano10	down	up	up
mmu-miR-449c-5p	NONMMUG040815.2	Ano10	down	up	up
mmu-miR-489-3p	NONMMUG040815.2	Ano10	down	up	up
mmu-miR-7667-5p	NONMMUG040815.2	Ano10	down	up	up
mmu-miR-935	NONMMUG040815.2	Ano10	down	up	up
mmu-miR-3097-5p	NONMMUG045868.2	Lsr	up	down	down
mmu-miR-6946-5p	NONMMUG045868.2	Lsr	up	down	down
mmu-miR-7073-5p	NONMMUG045868.2	Lsr	up	down	down
mmu-miR-7688-5p	NONMMUG045868.2	Lsr	up	down	down
mmu-miR-7b-5p	NONMMUG045868.2	Lsr	up	down	down
mmu-miR-129-5p	NONMMUG040815.2	Zcchc4	down	up	up
mmu-miR-135a-5p	NONMMUG040815.2	Zcchc4	down	up	up
mmu-miR-449c-5p	NONMMUG040815.2	Zcchc4	down	up	up
mmu-miR-489-3p	NONMMUG040815.2	Zcchc4	down	up	up
mmu-miR-7667-5p	NONMMUG040815.2	Zcchc4	down	up	up
mmu-miR-935	NONMMUG040815.2	Zcchc4	down	up	up
mmu-miR-139-3p	NONMMUG032191.2	Stard9	up	down	down
mmu-miR-3072-3p	NONMMUG032191.2	Stard9	up	down	down
mmu-miR-3082-5p	NONMMUG032191.2	Stard9	up	down	down
mmu-miR-3097-5p	NONMMUG032191.2	Stard9	up	down	down
mmu-miR-380-5p	NONMMUG032191.2	Stard9	up	down	down
mmu-miR-7073-5p	NONMMUG032191.2	Stard9	up	down	down
mmu-miR-7079-3p	NONMMUG032191.2	Stard9	up	down	down
mmu-miR-7091-5p	NONMMUG032191.2	Stard9	up	down	down
mmu-miR-7092-5p	NONMMUG032191.2	Stard9	up	down	down
mmu-miR-7240-5p	NONMMUG032191.2	Stard9	up	down	down
mmu-miR-7688-5p	NONMMUG032191.2	Stard9	up	down	down
mmu-miR-7b-5p	NONMMUG032191.2	Stard9	up	down	down
mmu-miR-146b-3p	NONMMUG042624.2	Atrx	down	up	up
mmu-miR-449a-3p	NONMMUG042624.2	Atrx	down	up	up
mmu-miR-466i-3p	NONMMUG042624.2	Atrx	down	up	up
mmu-miR-146b-3p	NONMMUG002618.2	Atrx	down	up	up
mmu-miR-466i-3p	NONMMUG002618.2	Atrx	down	up	up
mmu-miR-8103	NONMMUG002618.2	Atrx	down	up	up
mmu-miR-129-5p	NONMMUG052082.1	Slc20a1	down	up	up
mmu-miR-466i-3p	NONMMUG052082.1	Slc20a1	down	up	up
mmu-miR-8103	NONMMUG052082.1	Slc20a1	down	up	up
mmu-miR-129-5p	NONMMUG066722.1	Mtf1	down	up	up
mmu-miR-146b-3p	NONMMUG066722.1	Mtf1	down	up	up
mmu-miR-146b-5p	NONMMUG066722.1	Mtf1	down	up	up
mmu-miR-28b	NONMMUG066722.1	Mtf1	down	up	up
mmu-miR-449a-3p	NONMMUG066722.1	Mtf1	down	up	up
mmu-miR-466i-3p	NONMMUG066722.1	Mtf1	down	up	up
mmu-miR-5615-3p	NONMMUG066722.1	Mtf1	down	up	up
mmu-miR-7033-5p	NONMMUG066722.1	Mtf1	down	up	up
mmu-miR-139-3p	NONMMUG063422.1	Ifi27	up	down	down
mmu-miR-483-3p	NONMMUG063422.1	Ifi27	up	down	down
mmu-miR-7073-5p	NONMMUG063422.1	Ifi27	up	down	down
mmu-miR-7092-5p	NONMMUG063422.1	Ifi27	up	down	down
mmu-miR-7240-5p	NONMMUG063422.1	Ifi27	up	down	down
mmu-miR-7b-5p	NONMMUG063422.1	Ifi27	up	down	down
mmu-miR-483-3p	NONMMUG008397.2	Ifi27	up	down	down
mmu-miR-7092-5p	NONMMUG008397.2	Ifi27	up	down	down
mmu-miR-7b-5p	NONMMUG008397.2	Ifi27	up	down	down
mmu-miR-466i-3p	NONMMUG041497.2	Cep63	down	up	up
mmu-miR-8103	NONMMUG041497.2	Cep63	down	up	up
mmu-miR-8103	NONMMUG020091.2	Cep63	down	up	up
mmu-miR-139-3p	NONMMUG016329.2	Zdhhc23	up	down	down
mmu-miR-196a-5p	NONMMUG016329.2	Zdhhc23	up	down	down
mmu-miR-3082-5p	NONMMUG016329.2	Zdhhc23	up	down	down
mmu-miR-3097-5p	NONMMUG016329.2	Zdhhc23	up	down	down
mmu-miR-139-3p	NONMMUG016479.2	Zdhhc23	up	down	down
mmu-miR-196a-5p	NONMMUG016479.2	Zdhhc23	up	down	down
mmu-miR-3082-5p	NONMMUG016479.2	Zdhhc23	up	down	down
mmu-miR-3097-5p	NONMMUG016479.2	Zdhhc23	up	down	down
mmu-miR-3072-3p	NONMMUG072266.1	Wtip	up	down	down
mmu-miR-3097-5p	NONMMUG072266.1	Wtip	up	down	down
mmu-miR-139-3p	NONMMUG035780.2	Stk36	up	down	down
mmu-miR-196a-5p	NONMMUG035780.2	Stk36	up	down	down
mmu-miR-3072-3p	NONMMUG035780.2	Stk36	up	down	down
mmu-miR-3082-5p	NONMMUG035780.2	Stk36	up	down	down
mmu-miR-3097-5p	NONMMUG035780.2	Stk36	up	down	down
mmu-miR-3099-3p	NONMMUG035780.2	Stk36	up	down	down
mmu-miR-380-5p	NONMMUG035780.2	Stk36	up	down	down
mmu-miR-6946-5p	NONMMUG035780.2	Stk36	up	down	down
mmu-miR-7073-5p	NONMMUG035780.2	Stk36	up	down	down
mmu-miR-7079-3p	NONMMUG035780.2	Stk36	up	down	down
mmu-miR-7091-5p	NONMMUG035780.2	Stk36	up	down	down
mmu-miR-7240-5p	NONMMUG035780.2	Stk36	up	down	down
mmu-miR-7688-5p	NONMMUG035780.2	Stk36	up	down	down
mmu-miR-7b-5p	NONMMUG035780.2	Stk36	up	down	down
mmu-miR-135a-5p	NONMMUG000107.2	Oasl1	down	up	up
mmu-miR-449c-5p	NONMMUG000107.2	Oasl1	down	up	up
mmu-miR-466m-3p	NONMMUG000107.2	Oasl1	down	up	up
mmu-miR-7667-5p	NONMMUG000107.2	Oasl1	down	up	up
mmu-miR-129-5p	NONMMUG002239.2	Tmem258	down	up	up
mmu-miR-146b-3p	NONMMUG002239.2	Tmem258	down	up	up
mmu-miR-146b-5p	NONMMUG002239.2	Tmem258	down	up	up
mmu-miR-1948-5p	NONMMUG002239.2	Tmem258	down	up	up
mmu-miR-449a-3p	NONMMUG002239.2	Tmem258	down	up	up
mmu-miR-466i-3p	NONMMUG002239.2	Tmem258	down	up	up
mmu-miR-7033-5p	NONMMUG002239.2	Tmem258	down	up	up
mmu-miR-8103	NONMMUG002239.2	Tmem258	down	up	up
mmu-miR-139-3p	NONMMUG035780.2	Stab2	up	down	down
mmu-miR-196a-5p	NONMMUG035780.2	Stab2	up	down	down
mmu-miR-3072-3p	NONMMUG035780.2	Stab2	up	down	down
mmu-miR-3082-5p	NONMMUG035780.2	Stab2	up	down	down
mmu-miR-3097-5p	NONMMUG035780.2	Stab2	up	down	down
mmu-miR-3099-3p	NONMMUG035780.2	Stab2	up	down	down
mmu-miR-380-5p	NONMMUG035780.2	Stab2	up	down	down
mmu-miR-483-3p	NONMMUG035780.2	Stab2	up	down	down
mmu-miR-6946-5p	NONMMUG035780.2	Stab2	up	down	down
mmu-miR-7073-5p	NONMMUG035780.2	Stab2	up	down	down
mmu-miR-7079-3p	NONMMUG035780.2	Stab2	up	down	down
mmu-miR-7091-5p	NONMMUG035780.2	Stab2	up	down	down
mmu-miR-7092-5p	NONMMUG035780.2	Stab2	up	down	down
mmu-miR-7240-5p	NONMMUG035780.2	Stab2	up	down	down
mmu-miR-7688-5p	NONMMUG035780.2	Stab2	up	down	down
mmu-miR-7b-5p	NONMMUG035780.2	Stab2	up	down	down
mmu-miR-139-3p	NONMMUG041359.2	Stab2	up	down	down
mmu-miR-3072-3p	NONMMUG041359.2	Stab2	up	down	down
mmu-miR-3097-5p	NONMMUG041359.2	Stab2	up	down	down
mmu-miR-3099-3p	NONMMUG041359.2	Stab2	up	down	down
mmu-miR-380-5p	NONMMUG041359.2	Stab2	up	down	down
mmu-miR-6946-5p	NONMMUG041359.2	Stab2	up	down	down
mmu-miR-7073-5p	NONMMUG041359.2	Stab2	up	down	down
mmu-miR-7079-3p	NONMMUG041359.2	Stab2	up	down	down
mmu-miR-7091-5p	NONMMUG041359.2	Stab2	up	down	down
mmu-miR-7240-5p	NONMMUG041359.2	Stab2	up	down	down
mmu-miR-7688-5p	NONMMUG041359.2	Stab2	up	down	down
mmu-miR-7b-5p	NONMMUG041359.2	Stab2	up	down	down
mmu-miR-129-5p	NONMMUG015170.2	Cd200	down	up	up
mmu-miR-135a-5p	NONMMUG015170.2	Cd200	down	up	up
mmu-miR-146b-3p	NONMMUG015170.2	Cd200	down	up	up
mmu-miR-146b-5p	NONMMUG015170.2	Cd200	down	up	up
mmu-miR-1956	NONMMUG015170.2	Cd200	down	up	up
mmu-miR-449a-3p	NONMMUG015170.2	Cd200	down	up	up
mmu-miR-449c-5p	NONMMUG015170.2	Cd200	down	up	up
mmu-miR-5615-3p	NONMMUG015170.2	Cd200	down	up	up
mmu-miR-7667-5p	NONMMUG015170.2	Cd200	down	up	up
mmu-miR-206-3p	NONMMUG011469.2	Gmcl1	up	down	down
mmu-miR-3082-5p	NONMMUG011469.2	Gmcl1	up	down	down
mmu-miR-7079-3p	NONMMUG011469.2	Gmcl1	up	down	down
mmu-miR-3082-5p	NONMMUG045541.2	Arid5b	up	down	down
mmu-miR-3097-5p	NONMMUG045541.2	Arid5b	up	down	down
mmu-miR-7079-3p	NONMMUG045541.2	Arid5b	up	down	down
mmu-miR-7092-5p	NONMMUG045541.2	Arid5b	up	down	down
mmu-miR-7688-5p	NONMMUG045541.2	Arid5b	up	down	down
mmu-miR-3082-5p	NONMMUG039342.2	Arid5b	up	down	down
mmu-miR-3097-5p	NONMMUG039342.2	Arid5b	up	down	down
mmu-miR-7079-3p	NONMMUG039342.2	Arid5b	up	down	down
mmu-miR-7688-5p	NONMMUG039342.2	Arid5b	up	down	down
mmu-miR-3082-5p	NONMMUG016916.2	Arid5b	up	down	down
mmu-miR-3097-5p	NONMMUG016916.2	Arid5b	up	down	down
mmu-miR-7079-3p	NONMMUG016916.2	Arid5b	up	down	down
mmu-miR-7092-5p	NONMMUG016916.2	Arid5b	up	down	down
mmu-miR-7688-5p	NONMMUG016916.2	Arid5b	up	down	down
mmu-miR-466i-3p	NONMMUG053324.1	Snx5	down	up	up
mmu-miR-8103	NONMMUG053324.1	Snx5	down	up	up
mmu-miR-8103	NONMMUG020091.2	Snx5	down	up	up
mmu-miR-139-3p	NONMMUG046592.1	Blnk	up	down	down
mmu-miR-3097-5p	NONMMUG046592.1	Blnk	up	down	down
mmu-miR-380-5p	NONMMUG046592.1	Blnk	up	down	down
mmu-miR-483-3p	NONMMUG046592.1	Blnk	up	down	down
mmu-miR-6946-5p	NONMMUG046592.1	Blnk	up	down	down
mmu-miR-7073-5p	NONMMUG046592.1	Blnk	up	down	down
mmu-miR-7079-3p	NONMMUG046592.1	Blnk	up	down	down
mmu-miR-7091-5p	NONMMUG046592.1	Blnk	up	down	down
mmu-miR-7092-5p	NONMMUG046592.1	Blnk	up	down	down
mmu-miR-7240-5p	NONMMUG046592.1	Blnk	up	down	down
mmu-miR-7688-5p	NONMMUG046592.1	Blnk	up	down	down
mmu-miR-7b-5p	NONMMUG046592.1	Blnk	up	down	down
mmu-miR-3072-3p	NONMMUG004449.2	Coro2b	up	down	down
mmu-miR-380-5p	NONMMUG004449.2	Coro2b	up	down	down
mmu-miR-7079-3p	NONMMUG004449.2	Coro2b	up	down	down
mmu-miR-7091-5p	NONMMUG004449.2	Coro2b	up	down	down
mmu-miR-7240-5p	NONMMUG004449.2	Coro2b	up	down	down
mmu-miR-7b-5p	NONMMUG004449.2	Coro2b	up	down	down
mmu-miR-7240-5p	NONMMUG006209.2	Slc11a2	up	down	down
mmu-miR-7b-5p	NONMMUG006209.2	Slc11a2	up	down	down
mmu-miR-3072-3p	NONMMUG036751.2	C2cd3	up	down	down
mmu-miR-3082-5p	NONMMUG036751.2	C2cd3	up	down	down
mmu-miR-3097-5p	NONMMUG036751.2	C2cd3	up	down	down
mmu-miR-7079-3p	NONMMUG036751.2	C2cd3	up	down	down
mmu-miR-7688-5p	NONMMUG036751.2	C2cd3	up	down	down
mmu-miR-3072-3p	NONMMUG028485.2	C2cd3	up	down	down
mmu-miR-3082-5p	NONMMUG028485.2	C2cd3	up	down	down
mmu-miR-3097-5p	NONMMUG028485.2	C2cd3	up	down	down
mmu-miR-380-5p	NONMMUG028485.2	C2cd3	up	down	down
mmu-miR-7079-3p	NONMMUG028485.2	C2cd3	up	down	down
mmu-miR-7688-5p	NONMMUG028485.2	C2cd3	up	down	down
mmu-miR-3072-3p	NONMMUG059201.1	C2cd3	up	down	down
mmu-miR-3082-5p	NONMMUG059201.1	C2cd3	up	down	down
mmu-miR-3097-5p	NONMMUG059201.1	C2cd3	up	down	down
mmu-miR-7079-3p	NONMMUG059201.1	C2cd3	up	down	down
mmu-miR-466i-3p	NONMMUG051064.1	Tsku	down	up	up
mmu-miR-7b-5p	NONMMUG000073.2	Zfp143	up	down	down
mmu-miR-129-5p	NONMMUG040815.2	Zfp976	down	up	up
mmu-miR-135a-5p	NONMMUG040815.2	Zfp976	down	up	up
mmu-miR-449c-5p	NONMMUG040815.2	Zfp976	down	up	up
mmu-miR-489-3p	NONMMUG040815.2	Zfp976	down	up	up
mmu-miR-7667-5p	NONMMUG040815.2	Zfp976	down	up	up
mmu-miR-935	NONMMUG040815.2	Zfp976	down	up	up
mmu-miR-129-5p	NONMMUG022369.3	Trafd1	down	up	up
mmu-miR-135a-5p	NONMMUG022369.3	Trafd1	down	up	up
mmu-miR-146b-3p	NONMMUG022369.3	Trafd1	down	up	up
mmu-miR-28b	NONMMUG022369.3	Trafd1	down	up	up
mmu-miR-449a-3p	NONMMUG022369.3	Trafd1	down	up	up
mmu-miR-449c-5p	NONMMUG022369.3	Trafd1	down	up	up
mmu-miR-466i-3p	NONMMUG022369.3	Trafd1	down	up	up
mmu-miR-5615-3p	NONMMUG022369.3	Trafd1	down	up	up
mmu-miR-7667-5p	NONMMUG022369.3	Trafd1	down	up	up
mmu-miR-8103	NONMMUG022369.3	Trafd1	down	up	up
mmu-miR-935	NONMMUG022369.3	Trafd1	down	up	up
mmu-miR-129-5p	NONMMUG041496.2	Trafd1	down	up	up
mmu-miR-135a-5p	NONMMUG041496.2	Trafd1	down	up	up
mmu-miR-146b-3p	NONMMUG041496.2	Trafd1	down	up	up
mmu-miR-28b	NONMMUG041496.2	Trafd1	down	up	up
mmu-miR-449a-3p	NONMMUG041496.2	Trafd1	down	up	up
mmu-miR-466i-3p	NONMMUG041496.2	Trafd1	down	up	up
mmu-miR-7667-5p	NONMMUG041496.2	Trafd1	down	up	up
mmu-miR-8103	NONMMUG041496.2	Trafd1	down	up	up
mmu-miR-935	NONMMUG041496.2	Trafd1	down	up	up
mmu-miR-3072-3p	NONMMUG013281.2	Ssbp2	up	down	down
mmu-miR-3082-5p	NONMMUG013281.2	Ssbp2	up	down	down
mmu-miR-380-5p	NONMMUG013281.2	Ssbp2	up	down	down
mmu-miR-7079-3p	NONMMUG013281.2	Ssbp2	up	down	down
mmu-miR-3072-3p	NONMMUG073990.1	Ssbp2	up	down	down
mmu-miR-3082-5p	NONMMUG073990.1	Ssbp2	up	down	down
mmu-miR-3097-5p	NONMMUG073990.1	Ssbp2	up	down	down
mmu-miR-380-5p	NONMMUG073990.1	Ssbp2	up	down	down
mmu-miR-7079-3p	NONMMUG073990.1	Ssbp2	up	down	down
mmu-miR-7091-5p	NONMMUG073990.1	Ssbp2	up	down	down
mmu-miR-135a-5p	NONMMUG022439.2	Ppa2	down	up	up
mmu-miR-466m-3p	NONMMUG022439.2	Ppa2	down	up	up
mmu-miR-7667-5p	NONMMUG022439.2	Ppa2	down	up	up
mmu-miR-139-3p	NONMMUG021454.2	Clec9a	up	down	down
mmu-miR-3072-3p	NONMMUG021454.2	Clec9a	up	down	down
mmu-miR-3082-5p	NONMMUG021454.2	Clec9a	up	down	down
mmu-miR-3097-5p	NONMMUG021454.2	Clec9a	up	down	down
mmu-miR-3099-3p	NONMMUG021454.2	Clec9a	up	down	down
mmu-miR-380-5p	NONMMUG021454.2	Clec9a	up	down	down
mmu-miR-483-3p	NONMMUG021454.2	Clec9a	up	down	down
mmu-miR-6946-5p	NONMMUG021454.2	Clec9a	up	down	down
mmu-miR-7073-5p	NONMMUG021454.2	Clec9a	up	down	down
mmu-miR-7079-3p	NONMMUG021454.2	Clec9a	up	down	down
mmu-miR-7091-5p	NONMMUG021454.2	Clec9a	up	down	down
mmu-miR-7092-5p	NONMMUG021454.2	Clec9a	up	down	down
mmu-miR-7240-5p	NONMMUG021454.2	Clec9a	up	down	down
mmu-miR-7688-5p	NONMMUG021454.2	Clec9a	up	down	down
mmu-miR-7b-5p	NONMMUG021454.2	Clec9a	up	down	down
mmu-miR-3072-3p	NONMMUG004449.2	Tbc1d16	up	down	down
mmu-miR-380-5p	NONMMUG004449.2	Tbc1d16	up	down	down
mmu-miR-7073-5p	NONMMUG004449.2	Tbc1d16	up	down	down
mmu-miR-7079-3p	NONMMUG004449.2	Tbc1d16	up	down	down
mmu-miR-7091-5p	NONMMUG004449.2	Tbc1d16	up	down	down
mmu-miR-7092-5p	NONMMUG004449.2	Tbc1d16	up	down	down
mmu-miR-7240-5p	NONMMUG004449.2	Tbc1d16	up	down	down
mmu-miR-7b-5p	NONMMUG004449.2	Tbc1d16	up	down	down
mmu-miR-139-3p	NONMMUG021454.2	Tmtc4	up	down	down
mmu-miR-3072-3p	NONMMUG021454.2	Tmtc4	up	down	down
mmu-miR-3082-5p	NONMMUG021454.2	Tmtc4	up	down	down
mmu-miR-3097-5p	NONMMUG021454.2	Tmtc4	up	down	down
mmu-miR-3099-3p	NONMMUG021454.2	Tmtc4	up	down	down
mmu-miR-380-5p	NONMMUG021454.2	Tmtc4	up	down	down
mmu-miR-483-3p	NONMMUG021454.2	Tmtc4	up	down	down
mmu-miR-6946-5p	NONMMUG021454.2	Tmtc4	up	down	down
mmu-miR-7073-5p	NONMMUG021454.2	Tmtc4	up	down	down
mmu-miR-7079-3p	NONMMUG021454.2	Tmtc4	up	down	down
mmu-miR-7091-5p	NONMMUG021454.2	Tmtc4	up	down	down
mmu-miR-7092-5p	NONMMUG021454.2	Tmtc4	up	down	down
mmu-miR-7240-5p	NONMMUG021454.2	Tmtc4	up	down	down
mmu-miR-7688-5p	NONMMUG021454.2	Tmtc4	up	down	down
mmu-miR-7b-5p	NONMMUG021454.2	Tmtc4	up	down	down
mmu-miR-3082-5p	NONMMUG003650.2	Usp49	up	down	down
mmu-miR-3097-5p	NONMMUG003650.2	Usp49	up	down	down
mmu-miR-3082-5p	NONMMUG013635.2	Usp49	up	down	down
mmu-miR-3097-5p	NONMMUG013635.2	Usp49	up	down	down
mmu-miR-3082-5p	NONMMUG016916.2	Usp49	up	down	down
mmu-miR-3097-5p	NONMMUG016916.2	Usp49	up	down	down
mmu-miR-129-5p	NONMMUG040815.2	Cars2	down	up	up
mmu-miR-135a-5p	NONMMUG040815.2	Cars2	down	up	up
mmu-miR-449c-5p	NONMMUG040815.2	Cars2	down	up	up
mmu-miR-489-3p	NONMMUG040815.2	Cars2	down	up	up
mmu-miR-7667-5p	NONMMUG040815.2	Cars2	down	up	up
mmu-miR-3072-3p	NONMMUG033334.2	Coq7	up	down	down
mmu-miR-3082-5p	NONMMUG033334.2	Coq7	up	down	down
mmu-miR-7079-3p	NONMMUG033334.2	Coq7	up	down	down
mmu-miR-7240-5p	NONMMUG033334.2	Coq7	up	down	down
mmu-miR-3072-3p	NONMMUG084482.2	Coq7	up	down	down
mmu-miR-7079-3p	NONMMUG084482.2	Coq7	up	down	down
mmu-miR-7240-5p	NONMMUG084482.2	Coq7	up	down	down
mmu-miR-129-5p	NONMMUG040815.2	Papss1	down	up	up
mmu-miR-135a-5p	NONMMUG040815.2	Papss1	down	up	up
mmu-miR-449c-5p	NONMMUG040815.2	Papss1	down	up	up
mmu-miR-489-3p	NONMMUG040815.2	Papss1	down	up	up
mmu-miR-7667-5p	NONMMUG040815.2	Papss1	down	up	up
mmu-miR-935	NONMMUG040815.2	Papss1	down	up	up
mmu-miR-139-3p	NONMMUG050698.1	Parpbp	up	down	down
mmu-miR-196a-5p	NONMMUG050698.1	Parpbp	up	down	down
mmu-miR-3072-3p	NONMMUG050698.1	Parpbp	up	down	down
mmu-miR-3082-5p	NONMMUG050698.1	Parpbp	up	down	down
mmu-miR-3097-5p	NONMMUG050698.1	Parpbp	up	down	down
mmu-miR-380-5p	NONMMUG050698.1	Parpbp	up	down	down
mmu-miR-6946-5p	NONMMUG050698.1	Parpbp	up	down	down
mmu-miR-7073-5p	NONMMUG050698.1	Parpbp	up	down	down
mmu-miR-7091-5p	NONMMUG050698.1	Parpbp	up	down	down
mmu-miR-7688-5p	NONMMUG050698.1	Parpbp	up	down	down
mmu-miR-129-5p	NONMMUG000830.2	Dchs1	down	up	up
mmu-miR-135a-5p	NONMMUG000830.2	Dchs1	down	up	up
mmu-miR-466i-3p	NONMMUG000830.2	Dchs1	down	up	up
mmu-miR-7667-5p	NONMMUG000830.2	Dchs1	down	up	up
mmu-miR-8103	NONMMUG000830.2	Dchs1	down	up	up
mmu-miR-3082-5p	NONMMUG035494.2	Exoc1	up	down	down
mmu-miR-3097-5p	NONMMUG035494.2	Exoc1	up	down	down
mmu-miR-7079-3p	NONMMUG035494.2	Exoc1	up	down	down
mmu-miR-3082-5p	NONMMUG036751.2	Exoc1	up	down	down
mmu-miR-3097-5p	NONMMUG036751.2	Exoc1	up	down	down
mmu-miR-7079-3p	NONMMUG036751.2	Exoc1	up	down	down
mmu-miR-7688-5p	NONMMUG036751.2	Exoc1	up	down	down
mmu-miR-139-3p	NONMMUG061335.1	Pigx	up	down	down
mmu-miR-196a-5p	NONMMUG061335.1	Pigx	up	down	down
mmu-miR-3082-5p	NONMMUG061335.1	Pigx	up	down	down
mmu-miR-483-3p	NONMMUG061335.1	Pigx	up	down	down
mmu-miR-7092-5p	NONMMUG061335.1	Pigx	up	down	down
mmu-miR-139-3p	NONMMUG008611.3	Slc39a13	up	down	down
mmu-miR-196a-5p	NONMMUG008611.3	Slc39a13	up	down	down
mmu-miR-3072-3p	NONMMUG008611.3	Slc39a13	up	down	down
mmu-miR-3082-5p	NONMMUG008611.3	Slc39a13	up	down	down
mmu-miR-3097-5p	NONMMUG008611.3	Slc39a13	up	down	down
mmu-miR-380-5p	NONMMUG008611.3	Slc39a13	up	down	down
mmu-miR-483-3p	NONMMUG008611.3	Slc39a13	up	down	down
mmu-miR-6946-5p	NONMMUG008611.3	Slc39a13	up	down	down
mmu-miR-7079-3p	NONMMUG008611.3	Slc39a13	up	down	down
mmu-miR-7091-5p	NONMMUG008611.3	Slc39a13	up	down	down
mmu-miR-7092-5p	NONMMUG008611.3	Slc39a13	up	down	down
mmu-miR-7240-5p	NONMMUG008611.3	Slc39a13	up	down	down
mmu-miR-7688-5p	NONMMUG008611.3	Slc39a13	up	down	down
mmu-miR-7b-5p	NONMMUG008611.3	Slc39a13	up	down	down
mmu-miR-139-3p	NONMMUG053858.1	Dohh	up	down	down
mmu-miR-3072-3p	NONMMUG053858.1	Dohh	up	down	down
mmu-miR-380-5p	NONMMUG053858.1	Dohh	up	down	down
mmu-miR-483-3p	NONMMUG053858.1	Dohh	up	down	down
mmu-miR-6946-5p	NONMMUG053858.1	Dohh	up	down	down
mmu-miR-7073-5p	NONMMUG053858.1	Dohh	up	down	down
mmu-miR-7079-3p	NONMMUG053858.1	Dohh	up	down	down
mmu-miR-7091-5p	NONMMUG053858.1	Dohh	up	down	down
mmu-miR-7092-5p	NONMMUG053858.1	Dohh	up	down	down
mmu-miR-7240-5p	NONMMUG053858.1	Dohh	up	down	down
mmu-miR-7688-5p	NONMMUG053858.1	Dohh	up	down	down
mmu-miR-7b-5p	NONMMUG053858.1	Dohh	up	down	down
mmu-miR-146b-3p	NONMMUG025842.2	Prrg3	down	up	up
mmu-miR-146b-5p	NONMMUG025842.2	Prrg3	down	up	up
mmu-miR-1956	NONMMUG025842.2	Prrg3	down	up	up
mmu-miR-449a-3p	NONMMUG025842.2	Prrg3	down	up	up
mmu-miR-5615-3p	NONMMUG025842.2	Prrg3	down	up	up
mmu-miR-7033-5p	NONMMUG025842.2	Prrg3	down	up	up
mmu-miR-881-3p	NONMMUG025842.2	Prrg3	down	up	up
mmu-miR-483-3p	NONMMUG041781.3	Ciart	up	down	down
mmu-miR-7092-5p	NONMMUG041781.3	Ciart	up	down	down
mmu-miR-3072-3p	NONMMUG072266.1	Agmo	up	down	down
mmu-miR-3097-5p	NONMMUG072266.1	Agmo	up	down	down
mmu-miR-139-3p	NONMMUG007271.2	Rtn1	up	down	down
mmu-miR-3072-3p	NONMMUG007271.2	Rtn1	up	down	down
mmu-miR-3082-5p	NONMMUG007271.2	Rtn1	up	down	down
mmu-miR-3097-5p	NONMMUG007271.2	Rtn1	up	down	down
mmu-miR-380-5p	NONMMUG007271.2	Rtn1	up	down	down
mmu-miR-483-3p	NONMMUG007271.2	Rtn1	up	down	down
mmu-miR-7073-5p	NONMMUG007271.2	Rtn1	up	down	down
mmu-miR-7079-3p	NONMMUG007271.2	Rtn1	up	down	down
mmu-miR-7091-5p	NONMMUG007271.2	Rtn1	up	down	down
mmu-miR-7092-5p	NONMMUG007271.2	Rtn1	up	down	down
mmu-miR-7240-5p	NONMMUG007271.2	Rtn1	up	down	down
mmu-miR-7688-5p	NONMMUG007271.2	Rtn1	up	down	down
mmu-miR-139-3p	NONMMUG016329.2	Rara	up	down	down
mmu-miR-196a-5p	NONMMUG016329.2	Rara	up	down	down
mmu-miR-3082-5p	NONMMUG016329.2	Rara	up	down	down
mmu-miR-380-5p	NONMMUG016329.2	Rara	up	down	down
mmu-miR-466i-3p	NONMMUG050291.1	Hddc2	down	up	up
mmu-miR-8103	NONMMUG050291.1	Hddc2	down	up	up
mmu-miR-139-3p	NONMMUG035780.2	Trbc2	up	down	down
mmu-miR-3072-3p	NONMMUG035780.2	Trbc2	up	down	down
mmu-miR-3082-5p	NONMMUG035780.2	Trbc2	up	down	down
mmu-miR-3097-5p	NONMMUG035780.2	Trbc2	up	down	down
mmu-miR-3099-3p	NONMMUG035780.2	Trbc2	up	down	down
mmu-miR-380-5p	NONMMUG035780.2	Trbc2	up	down	down
mmu-miR-6946-5p	NONMMUG035780.2	Trbc2	up	down	down
mmu-miR-7073-5p	NONMMUG035780.2	Trbc2	up	down	down
mmu-miR-7079-3p	NONMMUG035780.2	Trbc2	up	down	down
mmu-miR-7091-5p	NONMMUG035780.2	Trbc2	up	down	down
mmu-miR-7092-5p	NONMMUG035780.2	Trbc2	up	down	down
mmu-miR-7240-5p	NONMMUG035780.2	Trbc2	up	down	down
mmu-miR-7688-5p	NONMMUG035780.2	Trbc2	up	down	down
mmu-miR-7b-5p	NONMMUG035780.2	Trbc2	up	down	down
mmu-miR-139-3p	NONMMUG041359.2	Trbc2	up	down	down
mmu-miR-3072-3p	NONMMUG041359.2	Trbc2	up	down	down
mmu-miR-3097-5p	NONMMUG041359.2	Trbc2	up	down	down
mmu-miR-3099-3p	NONMMUG041359.2	Trbc2	up	down	down
mmu-miR-380-5p	NONMMUG041359.2	Trbc2	up	down	down
mmu-miR-6946-5p	NONMMUG041359.2	Trbc2	up	down	down
mmu-miR-7073-5p	NONMMUG041359.2	Trbc2	up	down	down
mmu-miR-7079-3p	NONMMUG041359.2	Trbc2	up	down	down
mmu-miR-7091-5p	NONMMUG041359.2	Trbc2	up	down	down
mmu-miR-7240-5p	NONMMUG041359.2	Trbc2	up	down	down
mmu-miR-7688-5p	NONMMUG041359.2	Trbc2	up	down	down
mmu-miR-7b-5p	NONMMUG041359.2	Trbc2	up	down	down
mmu-miR-196a-5p	NONMMUG016479.2	Rptor	up	down	down
mmu-miR-3082-5p	NONMMUG016479.2	Rptor	up	down	down
mmu-miR-139-3p	NONMMUG035780.2	Adam22	up	down	down
mmu-miR-196a-5p	NONMMUG035780.2	Adam22	up	down	down
mmu-miR-3072-3p	NONMMUG035780.2	Adam22	up	down	down
mmu-miR-3082-5p	NONMMUG035780.2	Adam22	up	down	down
mmu-miR-3097-5p	NONMMUG035780.2	Adam22	up	down	down
mmu-miR-3099-3p	NONMMUG035780.2	Adam22	up	down	down
mmu-miR-380-5p	NONMMUG035780.2	Adam22	up	down	down
mmu-miR-483-3p	NONMMUG035780.2	Adam22	up	down	down
mmu-miR-6946-5p	NONMMUG035780.2	Adam22	up	down	down
mmu-miR-7073-5p	NONMMUG035780.2	Adam22	up	down	down
mmu-miR-7079-3p	NONMMUG035780.2	Adam22	up	down	down
mmu-miR-7091-5p	NONMMUG035780.2	Adam22	up	down	down
mmu-miR-7092-5p	NONMMUG035780.2	Adam22	up	down	down
mmu-miR-7240-5p	NONMMUG035780.2	Adam22	up	down	down
mmu-miR-7688-5p	NONMMUG035780.2	Adam22	up	down	down
mmu-miR-7b-5p	NONMMUG035780.2	Adam22	up	down	down
mmu-miR-139-3p	NONMMUG021454.2	Adam22	up	down	down
mmu-miR-3072-3p	NONMMUG021454.2	Adam22	up	down	down
mmu-miR-3082-5p	NONMMUG021454.2	Adam22	up	down	down
mmu-miR-3097-5p	NONMMUG021454.2	Adam22	up	down	down
mmu-miR-3099-3p	NONMMUG021454.2	Adam22	up	down	down
mmu-miR-380-5p	NONMMUG021454.2	Adam22	up	down	down
mmu-miR-483-3p	NONMMUG021454.2	Adam22	up	down	down
mmu-miR-6946-5p	NONMMUG021454.2	Adam22	up	down	down
mmu-miR-7073-5p	NONMMUG021454.2	Adam22	up	down	down
mmu-miR-7079-3p	NONMMUG021454.2	Adam22	up	down	down
mmu-miR-7091-5p	NONMMUG021454.2	Adam22	up	down	down
mmu-miR-7092-5p	NONMMUG021454.2	Adam22	up	down	down
mmu-miR-7240-5p	NONMMUG021454.2	Adam22	up	down	down
mmu-miR-7688-5p	NONMMUG021454.2	Adam22	up	down	down
mmu-miR-7b-5p	NONMMUG021454.2	Adam22	up	down	down
mmu-miR-139-3p	NONMMUG007271.2	Mbtps1	up	down	down
mmu-miR-3072-3p	NONMMUG007271.2	Mbtps1	up	down	down
mmu-miR-3082-5p	NONMMUG007271.2	Mbtps1	up	down	down
mmu-miR-3097-5p	NONMMUG007271.2	Mbtps1	up	down	down
mmu-miR-380-5p	NONMMUG007271.2	Mbtps1	up	down	down
mmu-miR-483-3p	NONMMUG007271.2	Mbtps1	up	down	down
mmu-miR-7073-5p	NONMMUG007271.2	Mbtps1	up	down	down
mmu-miR-7079-3p	NONMMUG007271.2	Mbtps1	up	down	down
mmu-miR-7091-5p	NONMMUG007271.2	Mbtps1	up	down	down
mmu-miR-7092-5p	NONMMUG007271.2	Mbtps1	up	down	down
mmu-miR-7240-5p	NONMMUG007271.2	Mbtps1	up	down	down
mmu-miR-7688-5p	NONMMUG007271.2	Mbtps1	up	down	down
mmu-miR-139-3p	NONMMUG032640.2	Mbtps1	up	down	down
mmu-miR-196a-5p	NONMMUG032640.2	Mbtps1	up	down	down
mmu-miR-3072-3p	NONMMUG032640.2	Mbtps1	up	down	down
mmu-miR-3082-5p	NONMMUG032640.2	Mbtps1	up	down	down
mmu-miR-3097-5p	NONMMUG032640.2	Mbtps1	up	down	down
mmu-miR-380-5p	NONMMUG032640.2	Mbtps1	up	down	down
mmu-miR-483-3p	NONMMUG032640.2	Mbtps1	up	down	down
mmu-miR-7079-3p	NONMMUG032640.2	Mbtps1	up	down	down
mmu-miR-7091-5p	NONMMUG032640.2	Mbtps1	up	down	down
mmu-miR-7092-5p	NONMMUG032640.2	Mbtps1	up	down	down
mmu-miR-7240-5p	NONMMUG032640.2	Mbtps1	up	down	down
mmu-miR-135a-5p	NONMMUG020761.3	Trappc6b	down	up	up
mmu-miR-449c-5p	NONMMUG020761.3	Trappc6b	down	up	up
mmu-miR-7667-5p	NONMMUG020761.3	Trappc6b	down	up	up
mmu-miR-3072-3p	NONMMUG017121.2	Hdac7	up	down	down
mmu-miR-3097-5p	NONMMUG017121.2	Hdac7	up	down	down
mmu-miR-3099-3p	NONMMUG017121.2	Hdac7	up	down	down
mmu-miR-380-5p	NONMMUG017121.2	Hdac7	up	down	down
mmu-miR-7073-5p	NONMMUG017121.2	Hdac7	up	down	down
mmu-miR-7079-3p	NONMMUG017121.2	Hdac7	up	down	down
mmu-miR-7091-5p	NONMMUG017121.2	Hdac7	up	down	down
mmu-miR-7240-5p	NONMMUG017121.2	Hdac7	up	down	down
mmu-miR-7688-5p	NONMMUG017121.2	Hdac7	up	down	down
mmu-miR-7b-5p	NONMMUG017121.2	Hdac7	up	down	down
mmu-miR-3072-3p	NONMMUG049759.1	Hdac7	up	down	down
mmu-miR-3097-5p	NONMMUG049759.1	Hdac7	up	down	down
mmu-miR-3099-3p	NONMMUG049759.1	Hdac7	up	down	down
mmu-miR-380-5p	NONMMUG049759.1	Hdac7	up	down	down
mmu-miR-7079-3p	NONMMUG049759.1	Hdac7	up	down	down
mmu-miR-7091-5p	NONMMUG049759.1	Hdac7	up	down	down
mmu-miR-7240-5p	NONMMUG049759.1	Hdac7	up	down	down
mmu-miR-7b-5p	NONMMUG049759.1	Hdac7	up	down	down
mmu-miR-139-3p	NONMMUG061537.1	Prkcq	up	down	down
mmu-miR-196a-5p	NONMMUG061537.1	Prkcq	up	down	down
mmu-miR-3082-5p	NONMMUG061537.1	Prkcq	up	down	down
mmu-miR-3097-5p	NONMMUG061537.1	Prkcq	up	down	down
mmu-miR-380-5p	NONMMUG061537.1	Prkcq	up	down	down
mmu-miR-483-3p	NONMMUG061537.1	Prkcq	up	down	down
mmu-miR-7092-5p	NONMMUG061537.1	Prkcq	up	down	down
mmu-miR-7688-5p	NONMMUG061537.1	Prkcq	up	down	down
mmu-miR-139-3p	NONMMUG016489.2	Prkcq	up	down	down
mmu-miR-196a-5p	NONMMUG016489.2	Prkcq	up	down	down
mmu-miR-3082-5p	NONMMUG016489.2	Prkcq	up	down	down
mmu-miR-3097-5p	NONMMUG016489.2	Prkcq	up	down	down
mmu-miR-380-5p	NONMMUG016489.2	Prkcq	up	down	down
mmu-miR-483-3p	NONMMUG016489.2	Prkcq	up	down	down
mmu-miR-7092-5p	NONMMUG016489.2	Prkcq	up	down	down
mmu-miR-7688-5p	NONMMUG016489.2	Prkcq	up	down	down
mmu-miR-139-3p	NONMMUG059040.1	Emid1	up	down	down
mmu-miR-196a-5p	NONMMUG059040.1	Emid1	up	down	down
mmu-miR-3072-3p	NONMMUG059040.1	Emid1	up	down	down
mmu-miR-3082-5p	NONMMUG059040.1	Emid1	up	down	down
mmu-miR-3097-5p	NONMMUG059040.1	Emid1	up	down	down
mmu-miR-380-5p	NONMMUG059040.1	Emid1	up	down	down
mmu-miR-483-3p	NONMMUG059040.1	Emid1	up	down	down
mmu-miR-7079-3p	NONMMUG059040.1	Emid1	up	down	down
mmu-miR-7091-5p	NONMMUG059040.1	Emid1	up	down	down
mmu-miR-7092-5p	NONMMUG059040.1	Emid1	up	down	down
mmu-miR-129-5p	NONMMUG066722.1	Ly6c2	down	up	up
mmu-miR-146b-3p	NONMMUG066722.1	Ly6c2	down	up	up
mmu-miR-146b-5p	NONMMUG066722.1	Ly6c2	down	up	up
mmu-miR-28b	NONMMUG066722.1	Ly6c2	down	up	up
mmu-miR-449a-3p	NONMMUG066722.1	Ly6c2	down	up	up
mmu-miR-466i-3p	NONMMUG066722.1	Ly6c2	down	up	up
mmu-miR-5615-3p	NONMMUG066722.1	Ly6c2	down	up	up
mmu-miR-7033-5p	NONMMUG066722.1	Ly6c2	down	up	up
mmu-miR-139-3p	NONMMUG016489.2	Vps13a	up	down	down
mmu-miR-196a-5p	NONMMUG016489.2	Vps13a	up	down	down
mmu-miR-3072-3p	NONMMUG016489.2	Vps13a	up	down	down
mmu-miR-3082-5p	NONMMUG016489.2	Vps13a	up	down	down
mmu-miR-3097-5p	NONMMUG016489.2	Vps13a	up	down	down
mmu-miR-380-5p	NONMMUG016489.2	Vps13a	up	down	down
mmu-miR-483-3p	NONMMUG016489.2	Vps13a	up	down	down
mmu-miR-6946-5p	NONMMUG016489.2	Vps13a	up	down	down
mmu-miR-7073-5p	NONMMUG016489.2	Vps13a	up	down	down
mmu-miR-7091-5p	NONMMUG016489.2	Vps13a	up	down	down
mmu-miR-7092-5p	NONMMUG016489.2	Vps13a	up	down	down
mmu-miR-7688-5p	NONMMUG016489.2	Vps13a	up	down	down
mmu-miR-129-5p	NONMMUG040815.2	Trmt1	down	up	up
mmu-miR-135a-5p	NONMMUG040815.2	Trmt1	down	up	up
mmu-miR-449c-5p	NONMMUG040815.2	Trmt1	down	up	up
mmu-miR-489-3p	NONMMUG040815.2	Trmt1	down	up	up
mmu-miR-7667-5p	NONMMUG040815.2	Trmt1	down	up	up
mmu-miR-935	NONMMUG040815.2	Trmt1	down	up	up
mmu-miR-3072-3p	NONMMUG045541.2	Ip6k1	up	down	down
mmu-miR-3082-5p	NONMMUG045541.2	Ip6k1	up	down	down
mmu-miR-3097-5p	NONMMUG045541.2	Ip6k1	up	down	down
mmu-miR-7073-5p	NONMMUG045541.2	Ip6k1	up	down	down
mmu-miR-7079-3p	NONMMUG045541.2	Ip6k1	up	down	down
mmu-miR-7688-5p	NONMMUG045541.2	Ip6k1	up	down	down
mmu-miR-3072-3p	NONMMUG036751.2	Ip6k1	up	down	down
mmu-miR-3082-5p	NONMMUG036751.2	Ip6k1	up	down	down
mmu-miR-3097-5p	NONMMUG036751.2	Ip6k1	up	down	down
mmu-miR-7073-5p	NONMMUG036751.2	Ip6k1	up	down	down
mmu-miR-7079-3p	NONMMUG036751.2	Ip6k1	up	down	down
mmu-miR-7688-5p	NONMMUG036751.2	Ip6k1	up	down	down
mmu-miR-3072-3p	NONMMUG014178.2	Ip6k1	up	down	down
mmu-miR-3082-5p	NONMMUG014178.2	Ip6k1	up	down	down
mmu-miR-3097-5p	NONMMUG014178.2	Ip6k1	up	down	down
mmu-miR-380-5p	NONMMUG014178.2	Ip6k1	up	down	down
mmu-miR-7073-5p	NONMMUG014178.2	Ip6k1	up	down	down
mmu-miR-7079-3p	NONMMUG014178.2	Ip6k1	up	down	down
mmu-miR-7688-5p	NONMMUG014178.2	Ip6k1	up	down	down
mmu-miR-3072-3p	NONMMUG028485.2	Ip6k1	up	down	down
mmu-miR-3082-5p	NONMMUG028485.2	Ip6k1	up	down	down
mmu-miR-3097-5p	NONMMUG028485.2	Ip6k1	up	down	down
mmu-miR-380-5p	NONMMUG028485.2	Ip6k1	up	down	down
mmu-miR-7079-3p	NONMMUG028485.2	Ip6k1	up	down	down
mmu-miR-7688-5p	NONMMUG028485.2	Ip6k1	up	down	down
mmu-miR-3072-3p	NONMMUG059201.1	Ip6k1	up	down	down
mmu-miR-3082-5p	NONMMUG059201.1	Ip6k1	up	down	down
mmu-miR-3097-5p	NONMMUG059201.1	Ip6k1	up	down	down
mmu-miR-7079-3p	NONMMUG059201.1	Ip6k1	up	down	down
mmu-miR-196a-5p	NONMMUG051962.1	Selenop	up	down	down
mmu-miR-139-3p	NONMMUG093329.1	Tbc1d12	up	down	down
mmu-miR-196a-5p	NONMMUG093329.1	Tbc1d12	up	down	down
mmu-miR-3072-3p	NONMMUG093329.1	Tbc1d12	up	down	down
mmu-miR-3082-5p	NONMMUG093329.1	Tbc1d12	up	down	down
mmu-miR-3097-5p	NONMMUG093329.1	Tbc1d12	up	down	down
mmu-miR-3099-3p	NONMMUG093329.1	Tbc1d12	up	down	down
mmu-miR-380-5p	NONMMUG093329.1	Tbc1d12	up	down	down
mmu-miR-483-3p	NONMMUG093329.1	Tbc1d12	up	down	down
mmu-miR-6946-5p	NONMMUG093329.1	Tbc1d12	up	down	down
mmu-miR-7073-5p	NONMMUG093329.1	Tbc1d12	up	down	down
mmu-miR-7079-3p	NONMMUG093329.1	Tbc1d12	up	down	down
mmu-miR-7091-5p	NONMMUG093329.1	Tbc1d12	up	down	down
mmu-miR-7092-5p	NONMMUG093329.1	Tbc1d12	up	down	down
mmu-miR-7240-5p	NONMMUG093329.1	Tbc1d12	up	down	down
mmu-miR-7688-5p	NONMMUG093329.1	Tbc1d12	up	down	down
mmu-miR-7b-5p	NONMMUG093329.1	Tbc1d12	up	down	down
mmu-miR-139-3p	NONMMUG061465.1	Tbc1d12	up	down	down
mmu-miR-196a-5p	NONMMUG061465.1	Tbc1d12	up	down	down
mmu-miR-3072-3p	NONMMUG061465.1	Tbc1d12	up	down	down
mmu-miR-3082-5p	NONMMUG061465.1	Tbc1d12	up	down	down
mmu-miR-3097-5p	NONMMUG061465.1	Tbc1d12	up	down	down
mmu-miR-3099-3p	NONMMUG061465.1	Tbc1d12	up	down	down
mmu-miR-380-5p	NONMMUG061465.1	Tbc1d12	up	down	down
mmu-miR-6946-5p	NONMMUG061465.1	Tbc1d12	up	down	down
mmu-miR-7073-5p	NONMMUG061465.1	Tbc1d12	up	down	down
mmu-miR-7079-3p	NONMMUG061465.1	Tbc1d12	up	down	down
mmu-miR-7091-5p	NONMMUG061465.1	Tbc1d12	up	down	down
mmu-miR-7092-5p	NONMMUG061465.1	Tbc1d12	up	down	down
mmu-miR-7240-5p	NONMMUG061465.1	Tbc1d12	up	down	down
mmu-miR-7688-5p	NONMMUG061465.1	Tbc1d12	up	down	down
mmu-miR-7b-5p	NONMMUG061465.1	Tbc1d12	up	down	down
mmu-miR-139-3p	NONMMUG041359.2	Cops7a	up	down	down
mmu-miR-3072-3p	NONMMUG041359.2	Cops7a	up	down	down
mmu-miR-3097-5p	NONMMUG041359.2	Cops7a	up	down	down
mmu-miR-3099-3p	NONMMUG041359.2	Cops7a	up	down	down
mmu-miR-380-5p	NONMMUG041359.2	Cops7a	up	down	down
mmu-miR-6946-5p	NONMMUG041359.2	Cops7a	up	down	down
mmu-miR-7073-5p	NONMMUG041359.2	Cops7a	up	down	down
mmu-miR-7079-3p	NONMMUG041359.2	Cops7a	up	down	down
mmu-miR-7091-5p	NONMMUG041359.2	Cops7a	up	down	down
mmu-miR-7240-5p	NONMMUG041359.2	Cops7a	up	down	down
mmu-miR-7688-5p	NONMMUG041359.2	Cops7a	up	down	down
mmu-miR-7b-5p	NONMMUG041359.2	Cops7a	up	down	down
mmu-miR-139-3p	NONMMUG061465.1	Spen	up	down	down
mmu-miR-196a-5p	NONMMUG061465.1	Spen	up	down	down
mmu-miR-3072-3p	NONMMUG061465.1	Spen	up	down	down
mmu-miR-3082-5p	NONMMUG061465.1	Spen	up	down	down
mmu-miR-3097-5p	NONMMUG061465.1	Spen	up	down	down
mmu-miR-3099-3p	NONMMUG061465.1	Spen	up	down	down
mmu-miR-380-5p	NONMMUG061465.1	Spen	up	down	down
mmu-miR-6946-5p	NONMMUG061465.1	Spen	up	down	down
mmu-miR-7073-5p	NONMMUG061465.1	Spen	up	down	down
mmu-miR-7079-3p	NONMMUG061465.1	Spen	up	down	down
mmu-miR-7091-5p	NONMMUG061465.1	Spen	up	down	down
mmu-miR-7240-5p	NONMMUG061465.1	Spen	up	down	down
mmu-miR-7688-5p	NONMMUG061465.1	Spen	up	down	down
mmu-miR-7b-5p	NONMMUG061465.1	Spen	up	down	down
mmu-miR-206-3p	NONMMUG018717.2	Fkbp15	up	down	down
mmu-miR-3082-5p	NONMMUG018717.2	Fkbp15	up	down	down
mmu-miR-7079-3p	NONMMUG018717.2	Fkbp15	up	down	down
mmu-miR-129-5p	NONMMUG022369.3	Pcdhgb4	down	up	up
mmu-miR-135a-5p	NONMMUG022369.3	Pcdhgb4	down	up	up
mmu-miR-146b-3p	NONMMUG022369.3	Pcdhgb4	down	up	up
mmu-miR-28b	NONMMUG022369.3	Pcdhgb4	down	up	up
mmu-miR-449a-3p	NONMMUG022369.3	Pcdhgb4	down	up	up
mmu-miR-466i-3p	NONMMUG022369.3	Pcdhgb4	down	up	up
mmu-miR-7667-5p	NONMMUG022369.3	Pcdhgb4	down	up	up
mmu-miR-8103	NONMMUG022369.3	Pcdhgb4	down	up	up
mmu-miR-935	NONMMUG022369.3	Pcdhgb4	down	up	up
mmu-miR-129-5p	NONMMUG041496.2	Pcdhgb4	down	up	up
mmu-miR-135a-5p	NONMMUG041496.2	Pcdhgb4	down	up	up
mmu-miR-146b-3p	NONMMUG041496.2	Pcdhgb4	down	up	up
mmu-miR-28b	NONMMUG041496.2	Pcdhgb4	down	up	up
mmu-miR-449a-3p	NONMMUG041496.2	Pcdhgb4	down	up	up
mmu-miR-466i-3p	NONMMUG041496.2	Pcdhgb4	down	up	up
mmu-miR-7667-5p	NONMMUG041496.2	Pcdhgb4	down	up	up
mmu-miR-8103	NONMMUG041496.2	Pcdhgb4	down	up	up
mmu-miR-935	NONMMUG041496.2	Pcdhgb4	down	up	up
mmu-miR-139-3p	NONMMUG053858.1	Treml1	up	down	down
mmu-miR-3072-3p	NONMMUG053858.1	Treml1	up	down	down
mmu-miR-3097-5p	NONMMUG053858.1	Treml1	up	down	down
mmu-miR-380-5p	NONMMUG053858.1	Treml1	up	down	down
mmu-miR-483-3p	NONMMUG053858.1	Treml1	up	down	down
mmu-miR-6946-5p	NONMMUG053858.1	Treml1	up	down	down
mmu-miR-7073-5p	NONMMUG053858.1	Treml1	up	down	down
mmu-miR-7079-3p	NONMMUG053858.1	Treml1	up	down	down
mmu-miR-7091-5p	NONMMUG053858.1	Treml1	up	down	down
mmu-miR-7092-5p	NONMMUG053858.1	Treml1	up	down	down
mmu-miR-7240-5p	NONMMUG053858.1	Treml1	up	down	down
mmu-miR-7688-5p	NONMMUG053858.1	Treml1	up	down	down
mmu-miR-7b-5p	NONMMUG053858.1	Treml1	up	down	down
mmu-miR-3082-5p	NONMMUG081715.1	Il10ra	up	down	down
mmu-miR-7079-3p	NONMMUG081715.1	Il10ra	up	down	down
mmu-miR-7092-5p	NONMMUG081715.1	Il10ra	up	down	down
mmu-miR-3082-5p	NONMMUG013687.2	Il10ra	up	down	down
mmu-miR-7079-3p	NONMMUG013687.2	Il10ra	up	down	down
mmu-miR-7092-5p	NONMMUG013687.2	Il10ra	up	down	down
mmu-miR-139-3p	NONMMUG093329.1	Pcdhga2	up	down	down
mmu-miR-196a-5p	NONMMUG093329.1	Pcdhga2	up	down	down
mmu-miR-3072-3p	NONMMUG093329.1	Pcdhga2	up	down	down
mmu-miR-3082-5p	NONMMUG093329.1	Pcdhga2	up	down	down
mmu-miR-3097-5p	NONMMUG093329.1	Pcdhga2	up	down	down
mmu-miR-3099-3p	NONMMUG093329.1	Pcdhga2	up	down	down
mmu-miR-380-5p	NONMMUG093329.1	Pcdhga2	up	down	down
mmu-miR-6946-5p	NONMMUG093329.1	Pcdhga2	up	down	down
mmu-miR-7073-5p	NONMMUG093329.1	Pcdhga2	up	down	down
mmu-miR-7079-3p	NONMMUG093329.1	Pcdhga2	up	down	down
mmu-miR-7091-5p	NONMMUG093329.1	Pcdhga2	up	down	down
mmu-miR-7092-5p	NONMMUG093329.1	Pcdhga2	up	down	down
mmu-miR-7240-5p	NONMMUG093329.1	Pcdhga2	up	down	down
mmu-miR-7688-5p	NONMMUG093329.1	Pcdhga2	up	down	down
mmu-miR-7b-5p	NONMMUG093329.1	Pcdhga2	up	down	down
mmu-miR-139-3p	NONMMUG061465.1	Pcdhga2	up	down	down
mmu-miR-196a-5p	NONMMUG061465.1	Pcdhga2	up	down	down
mmu-miR-3072-3p	NONMMUG061465.1	Pcdhga2	up	down	down
mmu-miR-3082-5p	NONMMUG061465.1	Pcdhga2	up	down	down
mmu-miR-3097-5p	NONMMUG061465.1	Pcdhga2	up	down	down
mmu-miR-3099-3p	NONMMUG061465.1	Pcdhga2	up	down	down
mmu-miR-380-5p	NONMMUG061465.1	Pcdhga2	up	down	down
mmu-miR-6946-5p	NONMMUG061465.1	Pcdhga2	up	down	down
mmu-miR-7073-5p	NONMMUG061465.1	Pcdhga2	up	down	down
mmu-miR-7079-3p	NONMMUG061465.1	Pcdhga2	up	down	down
mmu-miR-7091-5p	NONMMUG061465.1	Pcdhga2	up	down	down
mmu-miR-7092-5p	NONMMUG061465.1	Pcdhga2	up	down	down
mmu-miR-7240-5p	NONMMUG061465.1	Pcdhga2	up	down	down
mmu-miR-7688-5p	NONMMUG061465.1	Pcdhga2	up	down	down
mmu-miR-7b-5p	NONMMUG061465.1	Pcdhga2	up	down	down
mmu-miR-3072-3p	NONMMUG001656.2	Ildr2	up	down	down
mmu-miR-3082-5p	NONMMUG001656.2	Ildr2	up	down	down
mmu-miR-3097-5p	NONMMUG001656.2	Ildr2	up	down	down
mmu-miR-380-5p	NONMMUG001656.2	Ildr2	up	down	down
mmu-miR-7079-3p	NONMMUG001656.2	Ildr2	up	down	down
mmu-miR-3072-3p	NONMMUG024582.3	Ildr2	up	down	down
mmu-miR-3097-5p	NONMMUG024582.3	Ildr2	up	down	down
mmu-miR-380-5p	NONMMUG024582.3	Ildr2	up	down	down
mmu-miR-7079-3p	NONMMUG024582.3	Ildr2	up	down	down
mmu-miR-7688-5p	NONMMUG024582.3	Ildr2	up	down	down
mmu-miR-466i-3p	NONMMUG066594.1	Hyal2	down	up	up
mmu-miR-8103	NONMMUG066594.1	Hyal2	down	up	up
mmu-miR-3072-3p	NONMMUG004449.2	Cep95	up	down	down
mmu-miR-380-5p	NONMMUG004449.2	Cep95	up	down	down
mmu-miR-7079-3p	NONMMUG004449.2	Cep95	up	down	down
mmu-miR-7091-5p	NONMMUG004449.2	Cep95	up	down	down
mmu-miR-7092-5p	NONMMUG004449.2	Cep95	up	down	down
mmu-miR-7240-5p	NONMMUG004449.2	Cep95	up	down	down
mmu-miR-7b-5p	NONMMUG004449.2	Cep95	up	down	down
mmu-miR-466i-3p	NONMMUG041497.2	Atp5c1	down	up	up
mmu-miR-8103	NONMMUG041497.2	Atp5c1	down	up	up
mmu-miR-7b-5p	NONMMUG006209.2	Tlr11	up	down	down
mmu-miR-139-3p	NONMMUG016489.2	Shcbp1	up	down	down
mmu-miR-196a-5p	NONMMUG016489.2	Shcbp1	up	down	down
mmu-miR-3072-3p	NONMMUG016489.2	Shcbp1	up	down	down
mmu-miR-3082-5p	NONMMUG016489.2	Shcbp1	up	down	down
mmu-miR-3097-5p	NONMMUG016489.2	Shcbp1	up	down	down
mmu-miR-380-5p	NONMMUG016489.2	Shcbp1	up	down	down
mmu-miR-483-3p	NONMMUG016489.2	Shcbp1	up	down	down
mmu-miR-6946-5p	NONMMUG016489.2	Shcbp1	up	down	down
mmu-miR-7073-5p	NONMMUG016489.2	Shcbp1	up	down	down
mmu-miR-7091-5p	NONMMUG016489.2	Shcbp1	up	down	down
mmu-miR-7688-5p	NONMMUG016489.2	Shcbp1	up	down	down
mmu-miR-139-3p	NONMMUG046322.2	Shcbp1	up	down	down
mmu-miR-196a-5p	NONMMUG046322.2	Shcbp1	up	down	down
mmu-miR-3072-3p	NONMMUG046322.2	Shcbp1	up	down	down
mmu-miR-3082-5p	NONMMUG046322.2	Shcbp1	up	down	down
mmu-miR-3097-5p	NONMMUG046322.2	Shcbp1	up	down	down
mmu-miR-380-5p	NONMMUG046322.2	Shcbp1	up	down	down
mmu-miR-483-3p	NONMMUG046322.2	Shcbp1	up	down	down
mmu-miR-6946-5p	NONMMUG046322.2	Shcbp1	up	down	down
mmu-miR-7091-5p	NONMMUG046322.2	Shcbp1	up	down	down
mmu-miR-7688-5p	NONMMUG046322.2	Shcbp1	up	down	down
mmu-miR-139-3p	NONMMUG036531.2	Fryl	up	down	down
mmu-miR-196a-5p	NONMMUG036531.2	Fryl	up	down	down
mmu-miR-3072-3p	NONMMUG036531.2	Fryl	up	down	down
mmu-miR-3082-5p	NONMMUG036531.2	Fryl	up	down	down
mmu-miR-3097-5p	NONMMUG036531.2	Fryl	up	down	down
mmu-miR-3099-3p	NONMMUG036531.2	Fryl	up	down	down
mmu-miR-380-5p	NONMMUG036531.2	Fryl	up	down	down
mmu-miR-6946-5p	NONMMUG036531.2	Fryl	up	down	down
mmu-miR-7073-5p	NONMMUG036531.2	Fryl	up	down	down
mmu-miR-7079-3p	NONMMUG036531.2	Fryl	up	down	down
mmu-miR-7091-5p	NONMMUG036531.2	Fryl	up	down	down
mmu-miR-7240-5p	NONMMUG036531.2	Fryl	up	down	down
mmu-miR-7688-5p	NONMMUG036531.2	Fryl	up	down	down
mmu-miR-7b-5p	NONMMUG036531.2	Fryl	up	down	down
mmu-miR-139-3p	NONMMUG082898.1	Fryl	up	down	down
mmu-miR-196a-5p	NONMMUG082898.1	Fryl	up	down	down
mmu-miR-3072-3p	NONMMUG082898.1	Fryl	up	down	down
mmu-miR-3082-5p	NONMMUG082898.1	Fryl	up	down	down
mmu-miR-3097-5p	NONMMUG082898.1	Fryl	up	down	down
mmu-miR-3099-3p	NONMMUG082898.1	Fryl	up	down	down
mmu-miR-380-5p	NONMMUG082898.1	Fryl	up	down	down
mmu-miR-6946-5p	NONMMUG082898.1	Fryl	up	down	down
mmu-miR-7073-5p	NONMMUG082898.1	Fryl	up	down	down
mmu-miR-7079-3p	NONMMUG082898.1	Fryl	up	down	down
mmu-miR-7091-5p	NONMMUG082898.1	Fryl	up	down	down
mmu-miR-7240-5p	NONMMUG082898.1	Fryl	up	down	down
mmu-miR-7688-5p	NONMMUG082898.1	Fryl	up	down	down
mmu-miR-7b-5p	NONMMUG082898.1	Fryl	up	down	down
mmu-miR-139-3p	NONMMUG061465.1	Fryl	up	down	down
mmu-miR-196a-5p	NONMMUG061465.1	Fryl	up	down	down
mmu-miR-3072-3p	NONMMUG061465.1	Fryl	up	down	down
mmu-miR-3082-5p	NONMMUG061465.1	Fryl	up	down	down
mmu-miR-3097-5p	NONMMUG061465.1	Fryl	up	down	down
mmu-miR-3099-3p	NONMMUG061465.1	Fryl	up	down	down
mmu-miR-380-5p	NONMMUG061465.1	Fryl	up	down	down
mmu-miR-6946-5p	NONMMUG061465.1	Fryl	up	down	down
mmu-miR-7073-5p	NONMMUG061465.1	Fryl	up	down	down
mmu-miR-7079-3p	NONMMUG061465.1	Fryl	up	down	down
mmu-miR-7091-5p	NONMMUG061465.1	Fryl	up	down	down
mmu-miR-7092-5p	NONMMUG061465.1	Fryl	up	down	down
mmu-miR-7240-5p	NONMMUG061465.1	Fryl	up	down	down
mmu-miR-7688-5p	NONMMUG061465.1	Fryl	up	down	down
mmu-miR-7b-5p	NONMMUG061465.1	Fryl	up	down	down
mmu-miR-139-3p	NONMMUG044759.2	Fryl	up	down	down
mmu-miR-196a-5p	NONMMUG044759.2	Fryl	up	down	down
mmu-miR-3072-3p	NONMMUG044759.2	Fryl	up	down	down
mmu-miR-3082-5p	NONMMUG044759.2	Fryl	up	down	down
mmu-miR-3097-5p	NONMMUG044759.2	Fryl	up	down	down
mmu-miR-380-5p	NONMMUG044759.2	Fryl	up	down	down
mmu-miR-7079-3p	NONMMUG044759.2	Fryl	up	down	down
mmu-miR-7091-5p	NONMMUG044759.2	Fryl	up	down	down
mmu-miR-7092-5p	NONMMUG044759.2	Fryl	up	down	down
mmu-miR-7240-5p	NONMMUG044759.2	Fryl	up	down	down
mmu-miR-7688-5p	NONMMUG044759.2	Fryl	up	down	down
mmu-miR-7b-5p	NONMMUG044759.2	Fryl	up	down	down
mmu-miR-135a-5p	NONMMUG017301.2	Iqgap1	down	up	up
mmu-miR-466m-3p	NONMMUG017301.2	Iqgap1	down	up	up
mmu-miR-7667-5p	NONMMUG017301.2	Iqgap1	down	up	up
mmu-miR-3072-3p	NONMMUG049759.1	Pitpnm3	up	down	down
mmu-miR-3099-3p	NONMMUG049759.1	Pitpnm3	up	down	down
mmu-miR-380-5p	NONMMUG049759.1	Pitpnm3	up	down	down
mmu-miR-7079-3p	NONMMUG049759.1	Pitpnm3	up	down	down
mmu-miR-7091-5p	NONMMUG049759.1	Pitpnm3	up	down	down
mmu-miR-7240-5p	NONMMUG049759.1	Pitpnm3	up	down	down
mmu-miR-139-3p	NONMMUG061335.1	Aes	up	down	down
mmu-miR-196a-5p	NONMMUG061335.1	Aes	up	down	down
mmu-miR-3082-5p	NONMMUG061335.1	Aes	up	down	down
mmu-miR-483-3p	NONMMUG061335.1	Aes	up	down	down
mmu-miR-7092-5p	NONMMUG061335.1	Aes	up	down	down
mmu-miR-139-3p	NONMMUG016947.2	Mapk1ip1	up	down	down
mmu-miR-1933-3p	NONMMUG016947.2	Mapk1ip1	up	down	down
mmu-miR-3072-3p	NONMMUG016947.2	Mapk1ip1	up	down	down
mmu-miR-3097-5p	NONMMUG016947.2	Mapk1ip1	up	down	down
mmu-miR-3099-3p	NONMMUG016947.2	Mapk1ip1	up	down	down
mmu-miR-6946-5p	NONMMUG016947.2	Mapk1ip1	up	down	down
mmu-miR-7073-5p	NONMMUG016947.2	Mapk1ip1	up	down	down
mmu-miR-7688-5p	NONMMUG016947.2	Mapk1ip1	up	down	down
mmu-miR-7b-5p	NONMMUG016947.2	Mapk1ip1	up	down	down
mmu-miR-139-3p	NONMMUG005065.2	Mapk1ip1	up	down	down
mmu-miR-1933-3p	NONMMUG005065.2	Mapk1ip1	up	down	down
mmu-miR-3097-5p	NONMMUG005065.2	Mapk1ip1	up	down	down
mmu-miR-3099-3p	NONMMUG005065.2	Mapk1ip1	up	down	down
mmu-miR-6946-5p	NONMMUG005065.2	Mapk1ip1	up	down	down
mmu-miR-7073-5p	NONMMUG005065.2	Mapk1ip1	up	down	down
mmu-miR-7688-5p	NONMMUG005065.2	Mapk1ip1	up	down	down
mmu-miR-7b-5p	NONMMUG005065.2	Mapk1ip1	up	down	down
mmu-miR-3072-3p	NONMMUG017121.2	Mast3	up	down	down
mmu-miR-3097-5p	NONMMUG017121.2	Mast3	up	down	down
mmu-miR-380-5p	NONMMUG017121.2	Mast3	up	down	down
mmu-miR-7079-3p	NONMMUG017121.2	Mast3	up	down	down
mmu-miR-7091-5p	NONMMUG017121.2	Mast3	up	down	down
mmu-miR-7240-5p	NONMMUG017121.2	Mast3	up	down	down
mmu-miR-7b-5p	NONMMUG017121.2	Mast3	up	down	down
mmu-miR-129-5p	NONMMUG040815.2	Mmp8	down	up	up
mmu-miR-135a-5p	NONMMUG040815.2	Mmp8	down	up	up
mmu-miR-449c-5p	NONMMUG040815.2	Mmp8	down	up	up
mmu-miR-489-3p	NONMMUG040815.2	Mmp8	down	up	up
mmu-miR-7667-5p	NONMMUG040815.2	Mmp8	down	up	up
mmu-miR-139-3p	NONMMUG073989.1	Parva	up	down	down
mmu-miR-196a-5p	NONMMUG073989.1	Parva	up	down	down
mmu-miR-3072-3p	NONMMUG073989.1	Parva	up	down	down
mmu-miR-3082-5p	NONMMUG073989.1	Parva	up	down	down
mmu-miR-3097-5p	NONMMUG073989.1	Parva	up	down	down
mmu-miR-380-5p	NONMMUG073989.1	Parva	up	down	down
mmu-miR-7079-3p	NONMMUG073989.1	Parva	up	down	down
mmu-miR-7688-5p	NONMMUG073989.1	Parva	up	down	down
mmu-miR-139-3p	NONMMUG039342.2	Parva	up	down	down
mmu-miR-196a-5p	NONMMUG039342.2	Parva	up	down	down
mmu-miR-3072-3p	NONMMUG039342.2	Parva	up	down	down
mmu-miR-3082-5p	NONMMUG039342.2	Parva	up	down	down
mmu-miR-3097-5p	NONMMUG039342.2	Parva	up	down	down
mmu-miR-7073-5p	NONMMUG039342.2	Parva	up	down	down
mmu-miR-7079-3p	NONMMUG039342.2	Parva	up	down	down
mmu-miR-7688-5p	NONMMUG039342.2	Parva	up	down	down
mmu-miR-129-5p	NONMMUG021272.2	Npnt	down	up	up
mmu-miR-28b	NONMMUG021272.2	Npnt	down	up	up
mmu-miR-8103	NONMMUG021272.2	Npnt	down	up	up
mmu-miR-129-5p	NONMMUG047381.1	Npnt	down	up	up
mmu-miR-28b	NONMMUG047381.1	Npnt	down	up	up
mmu-miR-8103	NONMMUG047381.1	Npnt	down	up	up
mmu-miR-129-5p	NONMMUG027420.2	Phf20l1	down	up	up
mmu-miR-135a-5p	NONMMUG027420.2	Phf20l1	down	up	up
mmu-miR-146b-3p	NONMMUG027420.2	Phf20l1	down	up	up
mmu-miR-449a-3p	NONMMUG027420.2	Phf20l1	down	up	up
mmu-miR-449c-5p	NONMMUG027420.2	Phf20l1	down	up	up
mmu-miR-466i-3p	NONMMUG027420.2	Phf20l1	down	up	up
mmu-miR-489-3p	NONMMUG027420.2	Phf20l1	down	up	up
mmu-miR-5615-3p	NONMMUG027420.2	Phf20l1	down	up	up
mmu-miR-7667-5p	NONMMUG027420.2	Phf20l1	down	up	up
mmu-miR-8103	NONMMUG027420.2	Phf20l1	down	up	up
mmu-miR-129-5p	NONMMUG000751.2	Phf20l1	down	up	up
mmu-miR-135a-5p	NONMMUG000751.2	Phf20l1	down	up	up
mmu-miR-146b-3p	NONMMUG000751.2	Phf20l1	down	up	up
mmu-miR-449a-3p	NONMMUG000751.2	Phf20l1	down	up	up
mmu-miR-449c-5p	NONMMUG000751.2	Phf20l1	down	up	up
mmu-miR-466i-3p	NONMMUG000751.2	Phf20l1	down	up	up
mmu-miR-489-3p	NONMMUG000751.2	Phf20l1	down	up	up
mmu-miR-5615-3p	NONMMUG000751.2	Phf20l1	down	up	up
mmu-miR-7667-5p	NONMMUG000751.2	Phf20l1	down	up	up
mmu-miR-8103	NONMMUG000751.2	Phf20l1	down	up	up
mmu-miR-3072-3p	NONMMUG003189.2	Tdo2	up	down	down
mmu-miR-380-5p	NONMMUG003189.2	Tdo2	up	down	down
mmu-miR-7079-3p	NONMMUG003189.2	Tdo2	up	down	down
mmu-miR-7091-5p	NONMMUG003189.2	Tdo2	up	down	down
mmu-miR-7092-5p	NONMMUG003189.2	Tdo2	up	down	down
mmu-miR-7240-5p	NONMMUG003189.2	Tdo2	up	down	down
mmu-miR-7b-5p	NONMMUG003189.2	Tdo2	up	down	down
mmu-miR-3072-3p	NONMMUG004449.2	Tdo2	up	down	down
mmu-miR-380-5p	NONMMUG004449.2	Tdo2	up	down	down
mmu-miR-7073-5p	NONMMUG004449.2	Tdo2	up	down	down
mmu-miR-7079-3p	NONMMUG004449.2	Tdo2	up	down	down
mmu-miR-7091-5p	NONMMUG004449.2	Tdo2	up	down	down
mmu-miR-7092-5p	NONMMUG004449.2	Tdo2	up	down	down
mmu-miR-7240-5p	NONMMUG004449.2	Tdo2	up	down	down
mmu-miR-7b-5p	NONMMUG004449.2	Tdo2	up	down	down
mmu-miR-196a-5p	NONMMUG024797.2	St8sia4	up	down	down
mmu-miR-3082-5p	NONMMUG024797.2	St8sia4	up	down	down
mmu-miR-3097-5p	NONMMUG024797.2	St8sia4	up	down	down
mmu-miR-139-3p	NONMMUG016329.2	Pan3	up	down	down
mmu-miR-196a-5p	NONMMUG016329.2	Pan3	up	down	down
mmu-miR-3082-5p	NONMMUG016329.2	Pan3	up	down	down
mmu-miR-3097-5p	NONMMUG016329.2	Pan3	up	down	down
mmu-miR-380-5p	NONMMUG016329.2	Pan3	up	down	down
mmu-miR-6946-5p	NONMMUG016329.2	Pan3	up	down	down
mmu-miR-129-5p	NONMMUG015170.2	Pafah1b3	down	up	up
mmu-miR-135a-5p	NONMMUG015170.2	Pafah1b3	down	up	up
mmu-miR-146b-3p	NONMMUG015170.2	Pafah1b3	down	up	up
mmu-miR-146b-5p	NONMMUG015170.2	Pafah1b3	down	up	up
mmu-miR-1956	NONMMUG015170.2	Pafah1b3	down	up	up
mmu-miR-449a-3p	NONMMUG015170.2	Pafah1b3	down	up	up
mmu-miR-449c-5p	NONMMUG015170.2	Pafah1b3	down	up	up
mmu-miR-5615-3p	NONMMUG015170.2	Pafah1b3	down	up	up
mmu-miR-7667-5p	NONMMUG015170.2	Pafah1b3	down	up	up
mmu-miR-466i-3p	NONMMUG002618.2	Slc26a2	down	up	up
mmu-miR-8103	NONMMUG002618.2	Slc26a2	down	up	up
mmu-miR-139-3p	NONMMUG011008.2	Mfap4	up	down	down
mmu-miR-1933-3p	NONMMUG011008.2	Mfap4	up	down	down
mmu-miR-3072-3p	NONMMUG011008.2	Mfap4	up	down	down
mmu-miR-3097-5p	NONMMUG011008.2	Mfap4	up	down	down
mmu-miR-6946-5p	NONMMUG011008.2	Mfap4	up	down	down
mmu-miR-7073-5p	NONMMUG011008.2	Mfap4	up	down	down
mmu-miR-7079-3p	NONMMUG011008.2	Mfap4	up	down	down
mmu-miR-7688-5p	NONMMUG011008.2	Mfap4	up	down	down
mmu-miR-7b-5p	NONMMUG011008.2	Mfap4	up	down	down
mmu-miR-129-5p	NONMMUG000830.2	Ccdc114	down	up	up
mmu-miR-135a-5p	NONMMUG000830.2	Ccdc114	down	up	up
mmu-miR-466i-3p	NONMMUG000830.2	Ccdc114	down	up	up
mmu-miR-7667-5p	NONMMUG000830.2	Ccdc114	down	up	up
mmu-miR-8103	NONMMUG000830.2	Ccdc114	down	up	up
mmu-miR-129-5p	NONMMUG012186.2	Ccdc114	down	up	up
mmu-miR-135a-5p	NONMMUG012186.2	Ccdc114	down	up	up
mmu-miR-466i-3p	NONMMUG012186.2	Ccdc114	down	up	up
mmu-miR-7667-5p	NONMMUG012186.2	Ccdc114	down	up	up
mmu-miR-8103	NONMMUG012186.2	Ccdc114	down	up	up
mmu-miR-129-5p	NONMMUG039285.2	Ccdc114	down	up	up
mmu-miR-135a-5p	NONMMUG039285.2	Ccdc114	down	up	up
mmu-miR-146b-3p	NONMMUG039285.2	Ccdc114	down	up	up
mmu-miR-1948-5p	NONMMUG039285.2	Ccdc114	down	up	up
mmu-miR-466i-3p	NONMMUG039285.2	Ccdc114	down	up	up
mmu-miR-7667-5p	NONMMUG039285.2	Ccdc114	down	up	up
mmu-miR-8103	NONMMUG039285.2	Ccdc114	down	up	up
mmu-miR-129-5p	NONMMUG028231.2	Fkbp1a	down	up	up
mmu-miR-135a-5p	NONMMUG028231.2	Fkbp1a	down	up	up
mmu-miR-146b-3p	NONMMUG028231.2	Fkbp1a	down	up	up
mmu-miR-449a-3p	NONMMUG028231.2	Fkbp1a	down	up	up
mmu-miR-466i-3p	NONMMUG028231.2	Fkbp1a	down	up	up
mmu-miR-7667-5p	NONMMUG028231.2	Fkbp1a	down	up	up
mmu-miR-8103	NONMMUG028231.2	Fkbp1a	down	up	up
mmu-miR-935	NONMMUG028231.2	Fkbp1a	down	up	up
mmu-miR-129-5p	NONMMUG089376.1	Fkbp1a	down	up	up
mmu-miR-135a-5p	NONMMUG089376.1	Fkbp1a	down	up	up
mmu-miR-146b-3p	NONMMUG089376.1	Fkbp1a	down	up	up
mmu-miR-449a-3p	NONMMUG089376.1	Fkbp1a	down	up	up
mmu-miR-466i-3p	NONMMUG089376.1	Fkbp1a	down	up	up
mmu-miR-7667-5p	NONMMUG089376.1	Fkbp1a	down	up	up
mmu-miR-8103	NONMMUG089376.1	Fkbp1a	down	up	up
mmu-miR-935	NONMMUG089376.1	Fkbp1a	down	up	up
mmu-miR-139-3p	NONMMUG035780.2	Pgr	up	down	down
mmu-miR-196a-5p	NONMMUG035780.2	Pgr	up	down	down
mmu-miR-3072-3p	NONMMUG035780.2	Pgr	up	down	down
mmu-miR-3082-5p	NONMMUG035780.2	Pgr	up	down	down
mmu-miR-3097-5p	NONMMUG035780.2	Pgr	up	down	down
mmu-miR-3099-3p	NONMMUG035780.2	Pgr	up	down	down
mmu-miR-380-5p	NONMMUG035780.2	Pgr	up	down	down
mmu-miR-483-3p	NONMMUG035780.2	Pgr	up	down	down
mmu-miR-6946-5p	NONMMUG035780.2	Pgr	up	down	down
mmu-miR-7073-5p	NONMMUG035780.2	Pgr	up	down	down
mmu-miR-7079-3p	NONMMUG035780.2	Pgr	up	down	down
mmu-miR-7091-5p	NONMMUG035780.2	Pgr	up	down	down
mmu-miR-7092-5p	NONMMUG035780.2	Pgr	up	down	down
mmu-miR-7240-5p	NONMMUG035780.2	Pgr	up	down	down
mmu-miR-7688-5p	NONMMUG035780.2	Pgr	up	down	down
mmu-miR-7b-5p	NONMMUG035780.2	Pgr	up	down	down
mmu-miR-139-3p	NONMMUG061465.1	Pgr	up	down	down
mmu-miR-196a-5p	NONMMUG061465.1	Pgr	up	down	down
mmu-miR-3072-3p	NONMMUG061465.1	Pgr	up	down	down
mmu-miR-3082-5p	NONMMUG061465.1	Pgr	up	down	down
mmu-miR-3097-5p	NONMMUG061465.1	Pgr	up	down	down
mmu-miR-3099-3p	NONMMUG061465.1	Pgr	up	down	down
mmu-miR-380-5p	NONMMUG061465.1	Pgr	up	down	down
mmu-miR-6946-5p	NONMMUG061465.1	Pgr	up	down	down
mmu-miR-7073-5p	NONMMUG061465.1	Pgr	up	down	down
mmu-miR-7079-3p	NONMMUG061465.1	Pgr	up	down	down
mmu-miR-7091-5p	NONMMUG061465.1	Pgr	up	down	down
mmu-miR-7092-5p	NONMMUG061465.1	Pgr	up	down	down
mmu-miR-7240-5p	NONMMUG061465.1	Pgr	up	down	down
mmu-miR-7688-5p	NONMMUG061465.1	Pgr	up	down	down
mmu-miR-7b-5p	NONMMUG061465.1	Pgr	up	down	down
mmu-miR-196a-5p	NONMMUG013635.2	Dtl	up	down	down
mmu-miR-3082-5p	NONMMUG013635.2	Dtl	up	down	down
mmu-miR-3082-5p	NONMMUG082891.1	Dtl	up	down	down
mmu-miR-139-3p	NONMMUG007545.2	Zc3h7b	up	down	down
mmu-miR-483-3p	NONMMUG007545.2	Zc3h7b	up	down	down
mmu-miR-7092-5p	NONMMUG007545.2	Zc3h7b	up	down	down
mmu-miR-483-3p	NONMMUG007545.2	Dst	up	down	down
mmu-miR-7092-5p	NONMMUG007545.2	Dst	up	down	down
mmu-miR-3072-3p	NONMMUG010422.2	Fn1	up	down	down
mmu-miR-3099-3p	NONMMUG010422.2	Fn1	up	down	down
mmu-miR-380-5p	NONMMUG010422.2	Fn1	up	down	down
mmu-miR-6946-5p	NONMMUG010422.2	Fn1	up	down	down
mmu-miR-7091-5p	NONMMUG010422.2	Fn1	up	down	down
mmu-miR-7240-5p	NONMMUG010422.2	Fn1	up	down	down
mmu-miR-7b-5p	NONMMUG010422.2	Fn1	up	down	down
mmu-miR-3072-3p	NONMMUG049759.1	Sltm	up	down	down
mmu-miR-3097-5p	NONMMUG049759.1	Sltm	up	down	down
mmu-miR-3099-3p	NONMMUG049759.1	Sltm	up	down	down
mmu-miR-380-5p	NONMMUG049759.1	Sltm	up	down	down
mmu-miR-7079-3p	NONMMUG049759.1	Sltm	up	down	down
mmu-miR-7091-5p	NONMMUG049759.1	Sltm	up	down	down
mmu-miR-7240-5p	NONMMUG049759.1	Sltm	up	down	down
mmu-miR-7b-5p	NONMMUG049759.1	Sltm	up	down	down
mmu-miR-146b-3p	NONMMUG030332.2	Tubb4b	down	up	up
mmu-miR-146b-5p	NONMMUG030332.2	Tubb4b	down	up	up
mmu-miR-449a-3p	NONMMUG030332.2	Tubb4b	down	up	up
mmu-miR-466i-3p	NONMMUG030332.2	Tubb4b	down	up	up
mmu-miR-5615-3p	NONMMUG030332.2	Tubb4b	down	up	up
mmu-miR-7033-5p	NONMMUG030332.2	Tubb4b	down	up	up
mmu-miR-146b-3p	NONMMUG046386.2	Tubb4b	down	up	up
mmu-miR-146b-5p	NONMMUG046386.2	Tubb4b	down	up	up
mmu-miR-449a-3p	NONMMUG046386.2	Tubb4b	down	up	up
mmu-miR-466i-3p	NONMMUG046386.2	Tubb4b	down	up	up
mmu-miR-5615-3p	NONMMUG046386.2	Tubb4b	down	up	up
mmu-miR-7033-5p	NONMMUG046386.2	Tubb4b	down	up	up
mmu-miR-881-3p	NONMMUG046386.2	Tubb4b	down	up	up
mmu-miR-146b-3p	NONMMUG046386.2	Tubb4b	down	up	up
mmu-miR-146b-5p	NONMMUG046386.2	Tubb4b	down	up	up
mmu-miR-28b	NONMMUG046386.2	Tubb4b	down	up	up
mmu-miR-449a-3p	NONMMUG046386.2	Tubb4b	down	up	up
mmu-miR-466i-3p	NONMMUG046386.2	Tubb4b	down	up	up
mmu-miR-5615-3p	NONMMUG046386.2	Tubb4b	down	up	up
mmu-miR-7033-5p	NONMMUG046386.2	Tubb4b	down	up	up
mmu-miR-881-3p	NONMMUG046386.2	Tubb4b	down	up	up
mmu-miR-196a-5p	NONMMUG001420.2	Grb14	up	down	down
mmu-miR-3072-3p	NONMMUG001420.2	Grb14	up	down	down
mmu-miR-3082-5p	NONMMUG001420.2	Grb14	up	down	down
mmu-miR-3097-5p	NONMMUG001420.2	Grb14	up	down	down
mmu-miR-380-5p	NONMMUG001420.2	Grb14	up	down	down
mmu-miR-7688-5p	NONMMUG001420.2	Grb14	up	down	down
mmu-miR-196a-5p	NONMMUG073989.1	Grb14	up	down	down
mmu-miR-3072-3p	NONMMUG073989.1	Grb14	up	down	down
mmu-miR-3082-5p	NONMMUG073989.1	Grb14	up	down	down
mmu-miR-3097-5p	NONMMUG073989.1	Grb14	up	down	down
mmu-miR-380-5p	NONMMUG073989.1	Grb14	up	down	down
mmu-miR-7688-5p	NONMMUG073989.1	Grb14	up	down	down
mmu-miR-1933-3p	NONMMUG045868.2	Snx8	up	down	down
mmu-miR-3097-5p	NONMMUG045868.2	Snx8	up	down	down
mmu-miR-6946-5p	NONMMUG045868.2	Snx8	up	down	down
mmu-miR-7073-5p	NONMMUG045868.2	Snx8	up	down	down
mmu-miR-7688-5p	NONMMUG045868.2	Snx8	up	down	down
mmu-miR-129-5p	NONMMUG077180.1	Srp54	down	up	up
mmu-miR-28b	NONMMUG077180.1	Srp54	down	up	up
mmu-miR-466i-3p	NONMMUG077180.1	Srp54	down	up	up
mmu-miR-8103	NONMMUG077180.1	Srp54	down	up	up
mmu-miR-139-3p	NONMMUG067038.1	Rfx1	up	down	down
mmu-miR-196a-5p	NONMMUG067038.1	Rfx1	up	down	down
mmu-miR-3072-3p	NONMMUG067038.1	Rfx1	up	down	down
mmu-miR-3082-5p	NONMMUG067038.1	Rfx1	up	down	down
mmu-miR-3097-5p	NONMMUG067038.1	Rfx1	up	down	down
mmu-miR-3099-3p	NONMMUG067038.1	Rfx1	up	down	down
mmu-miR-380-5p	NONMMUG067038.1	Rfx1	up	down	down
mmu-miR-483-3p	NONMMUG067038.1	Rfx1	up	down	down
mmu-miR-6946-5p	NONMMUG067038.1	Rfx1	up	down	down
mmu-miR-7073-5p	NONMMUG067038.1	Rfx1	up	down	down
mmu-miR-7091-5p	NONMMUG067038.1	Rfx1	up	down	down
mmu-miR-7092-5p	NONMMUG067038.1	Rfx1	up	down	down
mmu-miR-7240-5p	NONMMUG067038.1	Rfx1	up	down	down
mmu-miR-7688-5p	NONMMUG067038.1	Rfx1	up	down	down
mmu-miR-7b-5p	NONMMUG067038.1	Rfx1	up	down	down
mmu-miR-139-3p	NONMMUG057069.1	Appl2	up	down	down
mmu-miR-196a-5p	NONMMUG057069.1	Appl2	up	down	down
mmu-miR-3072-3p	NONMMUG057069.1	Appl2	up	down	down
mmu-miR-3082-5p	NONMMUG057069.1	Appl2	up	down	down
mmu-miR-3097-5p	NONMMUG057069.1	Appl2	up	down	down
mmu-miR-380-5p	NONMMUG057069.1	Appl2	up	down	down
mmu-miR-483-3p	NONMMUG057069.1	Appl2	up	down	down
mmu-miR-6946-5p	NONMMUG057069.1	Appl2	up	down	down
mmu-miR-7073-5p	NONMMUG057069.1	Appl2	up	down	down
mmu-miR-7079-3p	NONMMUG057069.1	Appl2	up	down	down
mmu-miR-7091-5p	NONMMUG057069.1	Appl2	up	down	down
mmu-miR-7092-5p	NONMMUG057069.1	Appl2	up	down	down
mmu-miR-7688-5p	NONMMUG057069.1	Appl2	up	down	down
mmu-miR-7b-5p	NONMMUG057069.1	Appl2	up	down	down
mmu-miR-483-3p	NONMMUG041781.3	Xpo6	up	down	down
mmu-miR-7092-5p	NONMMUG041781.3	Xpo6	up	down	down
mmu-miR-466i-3p	NONMMUG005660.2	Adgrl4	down	up	up
mmu-miR-8103	NONMMUG005660.2	Adgrl4	down	up	up
mmu-miR-3082-5p	NONMMUG018717.2	Gramd1c	up	down	down
mmu-miR-7079-3p	NONMMUG018717.2	Gramd1c	up	down	down
mmu-miR-3072-3p	NONMMUG017121.2	Med12	up	down	down
mmu-miR-3097-5p	NONMMUG017121.2	Med12	up	down	down
mmu-miR-3099-3p	NONMMUG017121.2	Med12	up	down	down
mmu-miR-380-5p	NONMMUG017121.2	Med12	up	down	down
mmu-miR-7073-5p	NONMMUG017121.2	Med12	up	down	down
mmu-miR-7079-3p	NONMMUG017121.2	Med12	up	down	down
mmu-miR-7091-5p	NONMMUG017121.2	Med12	up	down	down
mmu-miR-7240-5p	NONMMUG017121.2	Med12	up	down	down
mmu-miR-7688-5p	NONMMUG017121.2	Med12	up	down	down
mmu-miR-7b-5p	NONMMUG017121.2	Med12	up	down	down
mmu-miR-3072-3p	NONMMUG049759.1	Med12	up	down	down
mmu-miR-3097-5p	NONMMUG049759.1	Med12	up	down	down
mmu-miR-3099-3p	NONMMUG049759.1	Med12	up	down	down
mmu-miR-380-5p	NONMMUG049759.1	Med12	up	down	down
mmu-miR-7079-3p	NONMMUG049759.1	Med12	up	down	down
mmu-miR-7091-5p	NONMMUG049759.1	Med12	up	down	down
mmu-miR-7240-5p	NONMMUG049759.1	Med12	up	down	down
mmu-miR-7b-5p	NONMMUG049759.1	Med12	up	down	down
mmu-miR-3082-5p	NONMMUG039342.2	2810474O19Rik	up	down	down
mmu-miR-3097-5p	NONMMUG039342.2	2810474O19Rik	up	down	down
mmu-miR-7079-3p	NONMMUG039342.2	2810474O19Rik	up	down	down
mmu-miR-7688-5p	NONMMUG039342.2	2810474O19Rik	up	down	down
mmu-miR-3082-5p	NONMMUG016916.2	2810474O19Rik	up	down	down
mmu-miR-3097-5p	NONMMUG016916.2	2810474O19Rik	up	down	down
mmu-miR-7079-3p	NONMMUG016916.2	2810474O19Rik	up	down	down
mmu-miR-7688-5p	NONMMUG016916.2	2810474O19Rik	up	down	down
mmu-miR-1933-3p	NONMMUG045868.2	Myo1e	up	down	down
mmu-miR-3097-5p	NONMMUG045868.2	Myo1e	up	down	down
mmu-miR-6946-5p	NONMMUG045868.2	Myo1e	up	down	down
mmu-miR-7073-5p	NONMMUG045868.2	Myo1e	up	down	down
mmu-miR-7688-5p	NONMMUG045868.2	Myo1e	up	down	down
mmu-miR-7b-5p	NONMMUG045868.2	Myo1e	up	down	down
mmu-miR-139-3p	NONMMUG021454.2	Acin1	up	down	down
mmu-miR-3072-3p	NONMMUG021454.2	Acin1	up	down	down
mmu-miR-3082-5p	NONMMUG021454.2	Acin1	up	down	down
mmu-miR-3097-5p	NONMMUG021454.2	Acin1	up	down	down
mmu-miR-3099-3p	NONMMUG021454.2	Acin1	up	down	down
mmu-miR-380-5p	NONMMUG021454.2	Acin1	up	down	down
mmu-miR-483-3p	NONMMUG021454.2	Acin1	up	down	down
mmu-miR-6946-5p	NONMMUG021454.2	Acin1	up	down	down
mmu-miR-7073-5p	NONMMUG021454.2	Acin1	up	down	down
mmu-miR-7079-3p	NONMMUG021454.2	Acin1	up	down	down
mmu-miR-7091-5p	NONMMUG021454.2	Acin1	up	down	down
mmu-miR-7092-5p	NONMMUG021454.2	Acin1	up	down	down
mmu-miR-7240-5p	NONMMUG021454.2	Acin1	up	down	down
mmu-miR-7688-5p	NONMMUG021454.2	Acin1	up	down	down
mmu-miR-7b-5p	NONMMUG021454.2	Acin1	up	down	down
mmu-miR-129-5p	NONMMUG048297.1	Rps13	down	up	up
mmu-miR-466i-3p	NONMMUG048297.1	Rps13	down	up	up
mmu-miR-8103	NONMMUG048297.1	Rps13	down	up	up
mmu-miR-935	NONMMUG048297.1	Rps13	down	up	up
mmu-miR-466i-3p	NONMMUG066594.1	Rps13	down	up	up
mmu-miR-8103	NONMMUG066594.1	Rps13	down	up	up
mmu-miR-135a-5p	NONMMUG041207.2	Raly	down	up	up
mmu-miR-466m-3p	NONMMUG041207.2	Raly	down	up	up
mmu-miR-7667-5p	NONMMUG041207.2	Raly	down	up	up
mmu-miR-129-5p	NONMMUG015835.2	Gpbp1	down	up	up
mmu-miR-135a-5p	NONMMUG015835.2	Gpbp1	down	up	up
mmu-miR-466i-3p	NONMMUG015835.2	Gpbp1	down	up	up
mmu-miR-489-3p	NONMMUG015835.2	Gpbp1	down	up	up
mmu-miR-8103	NONMMUG015835.2	Gpbp1	down	up	up
mmu-miR-3072-3p	NONMMUG028485.2	Ssbp3	up	down	down
mmu-miR-3082-5p	NONMMUG028485.2	Ssbp3	up	down	down
mmu-miR-3097-5p	NONMMUG028485.2	Ssbp3	up	down	down
mmu-miR-380-5p	NONMMUG028485.2	Ssbp3	up	down	down
mmu-miR-7079-3p	NONMMUG028485.2	Ssbp3	up	down	down
mmu-miR-3072-3p	NONMMUG059201.1	Ssbp3	up	down	down
mmu-miR-3082-5p	NONMMUG059201.1	Ssbp3	up	down	down
mmu-miR-3097-5p	NONMMUG059201.1	Ssbp3	up	down	down
mmu-miR-7079-3p	NONMMUG059201.1	Ssbp3	up	down	down
mmu-miR-466i-3p	NONMMUG085555.1	Mpv17l	down	up	up
mmu-miR-8103	NONMMUG085555.1	Mpv17l	down	up	up
mmu-miR-466i-3p	NONMMUG041497.2	Cdkn1a	down	up	up
mmu-miR-8103	NONMMUG041497.2	Cdkn1a	down	up	up
mmu-miR-129-5p	NONMMUG052082.1	Cdkn1a	down	up	up
mmu-miR-466i-3p	NONMMUG052082.1	Cdkn1a	down	up	up
mmu-miR-8103	NONMMUG052082.1	Cdkn1a	down	up	up
mmu-miR-3072-3p	NONMMUG010422.2	Hist1h2ab	up	down	down
mmu-miR-3099-3p	NONMMUG010422.2	Hist1h2ab	up	down	down
mmu-miR-380-5p	NONMMUG010422.2	Hist1h2ab	up	down	down
mmu-miR-6946-5p	NONMMUG010422.2	Hist1h2ab	up	down	down
mmu-miR-7073-5p	NONMMUG010422.2	Hist1h2ab	up	down	down
mmu-miR-7240-5p	NONMMUG010422.2	Hist1h2ab	up	down	down
mmu-miR-7b-5p	NONMMUG010422.2	Hist1h2ab	up	down	down
mmu-miR-139-3p	NONMMUG035780.2	Slfn14	up	down	down
mmu-miR-3072-3p	NONMMUG035780.2	Slfn14	up	down	down
mmu-miR-3097-5p	NONMMUG035780.2	Slfn14	up	down	down
mmu-miR-3099-3p	NONMMUG035780.2	Slfn14	up	down	down
mmu-miR-380-5p	NONMMUG035780.2	Slfn14	up	down	down
mmu-miR-6946-5p	NONMMUG035780.2	Slfn14	up	down	down
mmu-miR-7073-5p	NONMMUG035780.2	Slfn14	up	down	down
mmu-miR-7079-3p	NONMMUG035780.2	Slfn14	up	down	down
mmu-miR-7091-5p	NONMMUG035780.2	Slfn14	up	down	down
mmu-miR-7092-5p	NONMMUG035780.2	Slfn14	up	down	down
mmu-miR-7240-5p	NONMMUG035780.2	Slfn14	up	down	down
mmu-miR-7688-5p	NONMMUG035780.2	Slfn14	up	down	down
mmu-miR-7b-5p	NONMMUG035780.2	Slfn14	up	down	down
mmu-miR-139-3p	NONMMUG041359.2	Slfn14	up	down	down
mmu-miR-3072-3p	NONMMUG041359.2	Slfn14	up	down	down
mmu-miR-3097-5p	NONMMUG041359.2	Slfn14	up	down	down
mmu-miR-3099-3p	NONMMUG041359.2	Slfn14	up	down	down
mmu-miR-380-5p	NONMMUG041359.2	Slfn14	up	down	down
mmu-miR-6946-5p	NONMMUG041359.2	Slfn14	up	down	down
mmu-miR-7073-5p	NONMMUG041359.2	Slfn14	up	down	down
mmu-miR-7079-3p	NONMMUG041359.2	Slfn14	up	down	down
mmu-miR-7091-5p	NONMMUG041359.2	Slfn14	up	down	down
mmu-miR-7240-5p	NONMMUG041359.2	Slfn14	up	down	down
mmu-miR-7688-5p	NONMMUG041359.2	Slfn14	up	down	down
mmu-miR-7b-5p	NONMMUG041359.2	Slfn14	up	down	down
mmu-miR-146b-3p	NONMMUG046382.2	Ppp4r1	down	up	up
mmu-miR-146b-5p	NONMMUG046382.2	Ppp4r1	down	up	up
mmu-miR-1956	NONMMUG046382.2	Ppp4r1	down	up	up
mmu-miR-449a-3p	NONMMUG046382.2	Ppp4r1	down	up	up
mmu-miR-466i-3p	NONMMUG046382.2	Ppp4r1	down	up	up
mmu-miR-5615-3p	NONMMUG046382.2	Ppp4r1	down	up	up
mmu-miR-7033-5p	NONMMUG046382.2	Ppp4r1	down	up	up
mmu-miR-881-3p	NONMMUG046382.2	Ppp4r1	down	up	up
mmu-miR-139-3p	NONMMUG032191.2	Emsy	up	down	down
mmu-miR-3072-3p	NONMMUG032191.2	Emsy	up	down	down
mmu-miR-3082-5p	NONMMUG032191.2	Emsy	up	down	down
mmu-miR-3097-5p	NONMMUG032191.2	Emsy	up	down	down
mmu-miR-380-5p	NONMMUG032191.2	Emsy	up	down	down
mmu-miR-7073-5p	NONMMUG032191.2	Emsy	up	down	down
mmu-miR-7079-3p	NONMMUG032191.2	Emsy	up	down	down
mmu-miR-7091-5p	NONMMUG032191.2	Emsy	up	down	down
mmu-miR-7092-5p	NONMMUG032191.2	Emsy	up	down	down
mmu-miR-7240-5p	NONMMUG032191.2	Emsy	up	down	down
mmu-miR-7688-5p	NONMMUG032191.2	Emsy	up	down	down
mmu-miR-7b-5p	NONMMUG032191.2	Emsy	up	down	down
mmu-miR-1948-5p	NONMMUG027697.2	Rbm33	down	up	up
mmu-miR-466i-3p	NONMMUG027697.2	Rbm33	down	up	up
mmu-miR-139-3p	NONMMUG061465.1	Rap1gap	up	down	down
mmu-miR-196a-5p	NONMMUG061465.1	Rap1gap	up	down	down
mmu-miR-3072-3p	NONMMUG061465.1	Rap1gap	up	down	down
mmu-miR-3082-5p	NONMMUG061465.1	Rap1gap	up	down	down
mmu-miR-3097-5p	NONMMUG061465.1	Rap1gap	up	down	down
mmu-miR-3099-3p	NONMMUG061465.1	Rap1gap	up	down	down
mmu-miR-380-5p	NONMMUG061465.1	Rap1gap	up	down	down
mmu-miR-6946-5p	NONMMUG061465.1	Rap1gap	up	down	down
mmu-miR-7073-5p	NONMMUG061465.1	Rap1gap	up	down	down
mmu-miR-7079-3p	NONMMUG061465.1	Rap1gap	up	down	down
mmu-miR-7091-5p	NONMMUG061465.1	Rap1gap	up	down	down
mmu-miR-7240-5p	NONMMUG061465.1	Rap1gap	up	down	down
mmu-miR-7688-5p	NONMMUG061465.1	Rap1gap	up	down	down
mmu-miR-7b-5p	NONMMUG061465.1	Rap1gap	up	down	down
mmu-miR-135a-5p	NONMMUG033359.2	Raly	down	up	up
mmu-miR-449c-5p	NONMMUG033359.2	Raly	down	up	up
mmu-miR-466m-3p	NONMMUG033359.2	Raly	down	up	up
mmu-miR-7667-5p	NONMMUG033359.2	Raly	down	up	up
mmu-miR-935	NONMMUG033359.2	Raly	down	up	up
mmu-miR-7b-5p	NONMMUG006209.2	Fkbp3	up	down	down
mmu-miR-129-5p	NONMMUG077180.1	Cdk8	down	up	up
mmu-miR-466i-3p	NONMMUG077180.1	Cdk8	down	up	up
mmu-miR-8103	NONMMUG077180.1	Cdk8	down	up	up
mmu-miR-139-3p	NONMMUG007545.2	Arl15	up	down	down
mmu-miR-483-3p	NONMMUG007545.2	Arl15	up	down	down
mmu-miR-7092-5p	NONMMUG007545.2	Arl15	up	down	down
mmu-miR-466i-3p	NONMMUG041497.2	Slc16a11	down	up	up
mmu-miR-8103	NONMMUG041497.2	Slc16a11	down	up	up
mmu-miR-466i-3p	NONMMUG027714.2	Slc16a11	down	up	up
mmu-miR-8103	NONMMUG027714.2	Slc16a11	down	up	up
mmu-miR-466i-3p	NONMMUG035386.2	Slc16a11	down	up	up
mmu-miR-8103	NONMMUG035386.2	Slc16a11	down	up	up
mmu-miR-466i-3p	NONMMUG052082.1	Slc16a11	down	up	up
mmu-miR-8103	NONMMUG052082.1	Slc16a11	down	up	up
mmu-miR-1933-3p	NONMMUG045868.2	Dtd2	up	down	down
mmu-miR-7073-5p	NONMMUG045868.2	Dtd2	up	down	down
mmu-miR-7688-5p	NONMMUG045868.2	Dtd2	up	down	down
mmu-miR-139-3p	NONMMUG007271.2	Slc10a3	up	down	down
mmu-miR-3072-3p	NONMMUG007271.2	Slc10a3	up	down	down
mmu-miR-3082-5p	NONMMUG007271.2	Slc10a3	up	down	down
mmu-miR-3097-5p	NONMMUG007271.2	Slc10a3	up	down	down
mmu-miR-380-5p	NONMMUG007271.2	Slc10a3	up	down	down
mmu-miR-483-3p	NONMMUG007271.2	Slc10a3	up	down	down
mmu-miR-7073-5p	NONMMUG007271.2	Slc10a3	up	down	down
mmu-miR-7079-3p	NONMMUG007271.2	Slc10a3	up	down	down
mmu-miR-7091-5p	NONMMUG007271.2	Slc10a3	up	down	down
mmu-miR-7092-5p	NONMMUG007271.2	Slc10a3	up	down	down
mmu-miR-7240-5p	NONMMUG007271.2	Slc10a3	up	down	down
mmu-miR-7688-5p	NONMMUG007271.2	Slc10a3	up	down	down
mmu-miR-3072-3p	NONMMUG072270.1	Ddx11	up	down	down
mmu-miR-3082-5p	NONMMUG072270.1	Ddx11	up	down	down
mmu-miR-3097-5p	NONMMUG072270.1	Ddx11	up	down	down
mmu-miR-380-5p	NONMMUG072270.1	Ddx11	up	down	down
mmu-miR-7073-5p	NONMMUG072270.1	Ddx11	up	down	down
mmu-miR-7079-3p	NONMMUG072270.1	Ddx11	up	down	down
mmu-miR-7092-5p	NONMMUG072270.1	Ddx11	up	down	down
mmu-miR-7240-5p	NONMMUG072270.1	Ddx11	up	down	down
mmu-miR-7688-5p	NONMMUG072270.1	Ddx11	up	down	down
mmu-miR-28b	NONMMUG005660.2	Zdhhc6	down	up	up
mmu-miR-466i-3p	NONMMUG005660.2	Zdhhc6	down	up	up
mmu-miR-8103	NONMMUG005660.2	Zdhhc6	down	up	up
mmu-miR-483-3p	NONMMUG041781.3	Med12	up	down	down
mmu-miR-7073-5p	NONMMUG041781.3	Med12	up	down	down
mmu-miR-7092-5p	NONMMUG041781.3	Med12	up	down	down
mmu-miR-7b-5p	NONMMUG041781.3	Med12	up	down	down
mmu-miR-129-5p	NONMMUG043419.2	Eif6	down	up	up
mmu-miR-135a-5p	NONMMUG043419.2	Eif6	down	up	up
mmu-miR-146b-3p	NONMMUG043419.2	Eif6	down	up	up
mmu-miR-146b-5p	NONMMUG043419.2	Eif6	down	up	up
mmu-miR-449a-3p	NONMMUG043419.2	Eif6	down	up	up
mmu-miR-466i-3p	NONMMUG043419.2	Eif6	down	up	up
mmu-miR-5615-3p	NONMMUG043419.2	Eif6	down	up	up
mmu-miR-7667-5p	NONMMUG043419.2	Eif6	down	up	up
mmu-miR-8103	NONMMUG043419.2	Eif6	down	up	up
mmu-miR-935	NONMMUG043419.2	Eif6	down	up	up
mmu-miR-466i-3p	NONMMUG035386.2	Timp3	down	up	up
mmu-miR-8103	NONMMUG035386.2	Timp3	down	up	up
mmu-miR-208a-3p	NONMMUG023190.2	Bcs1l	down	up	up
mmu-miR-8103	NONMMUG023190.2	Bcs1l	down	up	up
mmu-miR-139-3p	NONMMUG007421.2	Chd1	up	down	down
mmu-miR-1933-3p	NONMMUG007421.2	Chd1	up	down	down
mmu-miR-3072-3p	NONMMUG007421.2	Chd1	up	down	down
mmu-miR-3082-5p	NONMMUG007421.2	Chd1	up	down	down
mmu-miR-3097-5p	NONMMUG007421.2	Chd1	up	down	down
mmu-miR-6946-5p	NONMMUG007421.2	Chd1	up	down	down
mmu-miR-7073-5p	NONMMUG007421.2	Chd1	up	down	down
mmu-miR-7079-3p	NONMMUG007421.2	Chd1	up	down	down
mmu-miR-7688-5p	NONMMUG007421.2	Chd1	up	down	down
mmu-miR-7b-5p	NONMMUG007421.2	Chd1	up	down	down
mmu-miR-135a-5p	NONMMUG041207.2	Trak1	down	up	up
mmu-miR-466m-3p	NONMMUG041207.2	Trak1	down	up	up
mmu-miR-7667-5p	NONMMUG041207.2	Trak1	down	up	up
mmu-miR-139-3p	NONMMUG013838.2	Ptprc	up	down	down
mmu-miR-1933-3p	NONMMUG013838.2	Ptprc	up	down	down
mmu-miR-3072-3p	NONMMUG013838.2	Ptprc	up	down	down
mmu-miR-3082-5p	NONMMUG013838.2	Ptprc	up	down	down
mmu-miR-3097-5p	NONMMUG013838.2	Ptprc	up	down	down
mmu-miR-380-5p	NONMMUG013838.2	Ptprc	up	down	down
mmu-miR-7073-5p	NONMMUG013838.2	Ptprc	up	down	down
mmu-miR-7079-3p	NONMMUG013838.2	Ptprc	up	down	down
mmu-miR-7092-5p	NONMMUG013838.2	Ptprc	up	down	down
[truncated: 2,530 more rows]

## Sheet: CB-MNC circRNA-miRNA-mRNA
miRNA	circRNA	symbol	reg_miRNA	reg_mRNA	reg_circRNA
mmu-miR-12191-3p	mmu_circ_0000823	Unk	down	up	up
mmu-miR-129-5p	mmu_circ_0000823	Unk	down	up	up
mmu-miR-146a-3p	mmu_circ_0000823	Unk	down	up	up
mmu-miR-181d-3p	mmu_circ_0000823	Unk	down	up	up
mmu-miR-1912-3p	mmu_circ_0000823	Unk	down	up	up
mmu-miR-201-5p	mmu_circ_0000823	Unk	down	up	up
mmu-miR-3473a	mmu_circ_0000823	Unk	down	up	up
mmu-miR-384-3p	mmu_circ_0000823	Unk	down	up	up
mmu-miR-449a-3p	mmu_circ_0000823	Unk	down	up	up
mmu-miR-449c-5p	mmu_circ_0000823	Unk	down	up	up
mmu-miR-489-3p	mmu_circ_0000823	Unk	down	up	up
mmu-miR-653-5p	mmu_circ_0000823	Unk	down	up	up
mmu-miR-7667-5p	mmu_circ_0000823	Unk	down	up	up
mmu-miR-871-3p	mmu_circ_0000823	Unk	down	up	up
mmu-miR-881-3p	mmu_circ_0000823	Unk	down	up	up
mmu-miR-12191-3p	mmu_circ_0001372	Prepl	down	up	up
mmu-miR-12191-3p	mmu_circ_0001769	Nme6	down	up	up
mmu-miR-465a-3p	mmu_circ_0001769	Nme6	down	up	up
mmu-miR-465b-3p	mmu_circ_0001769	Nme6	down	up	up
mmu-miR-465c-3p	mmu_circ_0001769	Nme6	down	up	up
mmu-miR-12191-3p	mmu_circ_0001372	Nme6	down	up	up
mmu-miR-465a-3p	mmu_circ_0001372	Nme6	down	up	up
mmu-miR-465b-3p	mmu_circ_0001372	Nme6	down	up	up
mmu-miR-465c-3p	mmu_circ_0001372	Nme6	down	up	up
mmu-miR-1199-5p	mmu_circ_0001089	Tab2	down	up	up
mmu-miR-129-5p	mmu_circ_0001089	Tab2	down	up	up
mmu-miR-1298-5p	mmu_circ_0001089	Tab2	down	up	up
mmu-miR-146a-3p	mmu_circ_0001089	Tab2	down	up	up
mmu-miR-201-5p	mmu_circ_0001089	Tab2	down	up	up
mmu-miR-204-3p	mmu_circ_0001089	Tab2	down	up	up
mmu-miR-384-3p	mmu_circ_0001089	Tab2	down	up	up
mmu-miR-449a-3p	mmu_circ_0001089	Tab2	down	up	up
mmu-miR-449c-5p	mmu_circ_0001089	Tab2	down	up	up
mmu-miR-489-3p	mmu_circ_0001089	Tab2	down	up	up
mmu-miR-5103	mmu_circ_0001089	Tab2	down	up	up
mmu-miR-653-5p	mmu_circ_0001089	Tab2	down	up	up
mmu-miR-7667-5p	mmu_circ_0001089	Tab2	down	up	up
mmu-miR-871-3p	mmu_circ_0001089	Tab2	down	up	up
mmu-miR-881-3p	mmu_circ_0001089	Tab2	down	up	up
mmu-miR-12191-3p	mmu_circ_0001508	Etfdh	down	up	up
mmu-miR-129-2-3p	mmu_circ_0001508	Etfdh	down	up	up
mmu-miR-465a-3p	mmu_circ_0001508	Etfdh	down	up	up
mmu-miR-465b-3p	mmu_circ_0001508	Etfdh	down	up	up
mmu-miR-465c-3p	mmu_circ_0001508	Etfdh	down	up	up
mmu-miR-497a-3p	mmu_circ_0001508	Etfdh	down	up	up
mmu-miR-7057-5p	mmu_circ_0001508	Etfdh	down	up	up
mmu-miR-1199-5p	mmu_circ_0001481	Fam98c	down	up	up
mmu-miR-12191-3p	mmu_circ_0001481	Fam98c	down	up	up
mmu-miR-129-2-3p	mmu_circ_0001481	Fam98c	down	up	up
mmu-miR-129-5p	mmu_circ_0001481	Fam98c	down	up	up
mmu-miR-1298-5p	mmu_circ_0001481	Fam98c	down	up	up
mmu-miR-204-3p	mmu_circ_0001481	Fam98c	down	up	up
mmu-miR-384-3p	mmu_circ_0001481	Fam98c	down	up	up
mmu-miR-449a-3p	mmu_circ_0001481	Fam98c	down	up	up
mmu-miR-449c-5p	mmu_circ_0001481	Fam98c	down	up	up
mmu-miR-465a-3p	mmu_circ_0001481	Fam98c	down	up	up
mmu-miR-465b-3p	mmu_circ_0001481	Fam98c	down	up	up
mmu-miR-465c-3p	mmu_circ_0001481	Fam98c	down	up	up
mmu-miR-489-3p	mmu_circ_0001481	Fam98c	down	up	up
mmu-miR-497a-3p	mmu_circ_0001481	Fam98c	down	up	up
mmu-miR-5103	mmu_circ_0001481	Fam98c	down	up	up
mmu-miR-653-5p	mmu_circ_0001481	Fam98c	down	up	up
mmu-miR-7057-5p	mmu_circ_0001481	Fam98c	down	up	up
mmu-miR-7063-3p	mmu_circ_0001481	Fam98c	down	up	up
mmu-miR-7667-5p	mmu_circ_0001481	Fam98c	down	up	up
mmu-miR-871-3p	mmu_circ_0001481	Fam98c	down	up	up
mmu-miR-881-3p	mmu_circ_0001481	Fam98c	down	up	up
mmu-miR-129-5p	mmu_circ_0001089	Appl2	down	up	up
mmu-miR-146a-3p	mmu_circ_0001089	Appl2	down	up	up
mmu-miR-201-5p	mmu_circ_0001089	Appl2	down	up	up
mmu-miR-384-3p	mmu_circ_0001089	Appl2	down	up	up
mmu-miR-449a-3p	mmu_circ_0001089	Appl2	down	up	up
mmu-miR-653-5p	mmu_circ_0001089	Appl2	down	up	up
mmu-miR-871-3p	mmu_circ_0001089	Appl2	down	up	up
mmu-miR-881-3p	mmu_circ_0001089	Appl2	down	up	up
mmu-miR-12191-3p	mmu_circ_0001508	Cope	down	up	up
mmu-miR-129-2-3p	mmu_circ_0001508	Cope	down	up	up
mmu-miR-12191-3p	mmu_circ_0001853	Cope	down	up	up
mmu-miR-129-2-3p	mmu_circ_0001853	Cope	down	up	up
mmu-miR-146a-3p	mmu_circ_0001879	Aurkaip1	down	up	up
mmu-miR-3473a	mmu_circ_0001879	Aurkaip1	down	up	up
mmu-miR-1199-5p	mmu_circ_0001089	Map4	down	up	up
mmu-miR-129-5p	mmu_circ_0001089	Map4	down	up	up
mmu-miR-1298-5p	mmu_circ_0001089	Map4	down	up	up
mmu-miR-146a-3p	mmu_circ_0001089	Map4	down	up	up
mmu-miR-201-5p	mmu_circ_0001089	Map4	down	up	up
mmu-miR-204-3p	mmu_circ_0001089	Map4	down	up	up
mmu-miR-384-3p	mmu_circ_0001089	Map4	down	up	up
mmu-miR-449a-3p	mmu_circ_0001089	Map4	down	up	up
mmu-miR-449c-5p	mmu_circ_0001089	Map4	down	up	up
mmu-miR-489-3p	mmu_circ_0001089	Map4	down	up	up
mmu-miR-5103	mmu_circ_0001089	Map4	down	up	up
mmu-miR-653-5p	mmu_circ_0001089	Map4	down	up	up
mmu-miR-7667-5p	mmu_circ_0001089	Map4	down	up	up
mmu-miR-871-3p	mmu_circ_0001089	Map4	down	up	up
mmu-miR-881-3p	mmu_circ_0001089	Map4	down	up	up
mmu-miR-146a-3p	mmu_circ_0001879	Prkcd	down	up	up
mmu-miR-181d-3p	mmu_circ_0001879	Prkcd	down	up	up
mmu-miR-3473a	mmu_circ_0001879	Prkcd	down	up	up
mmu-miR-12191-3p	mmu_circ_0001768	Prkcd	down	up	up
mmu-miR-146a-3p	mmu_circ_0001768	Prkcd	down	up	up
mmu-miR-181d-3p	mmu_circ_0001768	Prkcd	down	up	up
mmu-miR-1912-3p	mmu_circ_0001768	Prkcd	down	up	up
mmu-miR-3473a	mmu_circ_0001768	Prkcd	down	up	up
mmu-miR-449c-5p	mmu_circ_0001768	Prkcd	down	up	up
mmu-miR-7667-5p	mmu_circ_0001768	Prkcd	down	up	up
mmu-miR-1199-5p	mmu_circ_0001481	Agt	down	up	up
mmu-miR-12191-3p	mmu_circ_0001481	Agt	down	up	up
mmu-miR-129-2-3p	mmu_circ_0001481	Agt	down	up	up
mmu-miR-129-5p	mmu_circ_0001481	Agt	down	up	up
mmu-miR-1298-5p	mmu_circ_0001481	Agt	down	up	up
mmu-miR-204-3p	mmu_circ_0001481	Agt	down	up	up
mmu-miR-384-3p	mmu_circ_0001481	Agt	down	up	up
mmu-miR-449a-3p	mmu_circ_0001481	Agt	down	up	up
mmu-miR-449c-5p	mmu_circ_0001481	Agt	down	up	up
mmu-miR-465a-3p	mmu_circ_0001481	Agt	down	up	up
mmu-miR-465b-3p	mmu_circ_0001481	Agt	down	up	up
mmu-miR-465c-3p	mmu_circ_0001481	Agt	down	up	up
mmu-miR-489-3p	mmu_circ_0001481	Agt	down	up	up
mmu-miR-497a-3p	mmu_circ_0001481	Agt	down	up	up
mmu-miR-5103	mmu_circ_0001481	Agt	down	up	up
mmu-miR-653-5p	mmu_circ_0001481	Agt	down	up	up
mmu-miR-7057-5p	mmu_circ_0001481	Agt	down	up	up
mmu-miR-7063-3p	mmu_circ_0001481	Agt	down	up	up
mmu-miR-7661-5p	mmu_circ_0001481	Agt	down	up	up
mmu-miR-7667-5p	mmu_circ_0001481	Agt	down	up	up
mmu-miR-871-3p	mmu_circ_0001481	Agt	down	up	up
mmu-miR-881-3p	mmu_circ_0001481	Agt	down	up	up
mmu-miR-12191-3p	mmu_circ_0001769	Zfp131	down	up	up
mmu-miR-129-2-3p	mmu_circ_0001769	Zfp131	down	up	up
mmu-miR-465a-3p	mmu_circ_0001769	Zfp131	down	up	up
mmu-miR-465b-3p	mmu_circ_0001769	Zfp131	down	up	up
mmu-miR-465c-3p	mmu_circ_0001769	Zfp131	down	up	up
mmu-miR-1199-5p	mmu_circ_0001089	Mcrs1	down	up	up
mmu-miR-129-5p	mmu_circ_0001089	Mcrs1	down	up	up
mmu-miR-1298-5p	mmu_circ_0001089	Mcrs1	down	up	up
mmu-miR-146a-3p	mmu_circ_0001089	Mcrs1	down	up	up
mmu-miR-201-5p	mmu_circ_0001089	Mcrs1	down	up	up
mmu-miR-204-3p	mmu_circ_0001089	Mcrs1	down	up	up
mmu-miR-384-3p	mmu_circ_0001089	Mcrs1	down	up	up
mmu-miR-449a-3p	mmu_circ_0001089	Mcrs1	down	up	up
mmu-miR-449c-5p	mmu_circ_0001089	Mcrs1	down	up	up
mmu-miR-5103	mmu_circ_0001089	Mcrs1	down	up	up
mmu-miR-653-5p	mmu_circ_0001089	Mcrs1	down	up	up
mmu-miR-871-3p	mmu_circ_0001089	Mcrs1	down	up	up
mmu-miR-881-3p	mmu_circ_0001089	Mcrs1	down	up	up
mmu-miR-1193-3p	mmu_circ_0001714	Slc29a4	up	down	down
mmu-miR-134-3p	mmu_circ_0001714	Slc29a4	up	down	down
mmu-miR-1969	mmu_circ_0001714	Slc29a4	up	down	down
mmu-miR-196a-1-3p	mmu_circ_0001714	Slc29a4	up	down	down
mmu-miR-196a-5p	mmu_circ_0001714	Slc29a4	up	down	down
mmu-miR-3072-3p	mmu_circ_0001714	Slc29a4	up	down	down
mmu-miR-326-5p	mmu_circ_0001714	Slc29a4	up	down	down
mmu-miR-3963	mmu_circ_0001714	Slc29a4	up	down	down
mmu-miR-412-5p	mmu_circ_0001714	Slc29a4	up	down	down
mmu-miR-483-3p	mmu_circ_0001714	Slc29a4	up	down	down
mmu-miR-6539	mmu_circ_0001714	Slc29a4	up	down	down
mmu-miR-677-5p	mmu_circ_0001714	Slc29a4	up	down	down
mmu-miR-6947-5p	mmu_circ_0001714	Slc29a4	up	down	down
mmu-miR-701-3p	mmu_circ_0001714	Slc29a4	up	down	down
mmu-miR-7240-5p	mmu_circ_0001714	Slc29a4	up	down	down
mmu-miR-7b-5p	mmu_circ_0001714	Slc29a4	up	down	down
mmu-miR-879-3p	mmu_circ_0001714	Slc29a4	up	down	down
mmu-miR-12191-3p	mmu_circ_0001372	Tufm	down	up	up
mmu-miR-465a-3p	mmu_circ_0001372	Tufm	down	up	up
mmu-miR-465b-3p	mmu_circ_0001372	Tufm	down	up	up
mmu-miR-465c-3p	mmu_circ_0001372	Tufm	down	up	up
mmu-miR-1199-5p	mmu_circ_0001481	Fxyd7	down	up	up
mmu-miR-12191-3p	mmu_circ_0001481	Fxyd7	down	up	up
mmu-miR-129-2-3p	mmu_circ_0001481	Fxyd7	down	up	up
mmu-miR-129-5p	mmu_circ_0001481	Fxyd7	down	up	up
mmu-miR-1298-5p	mmu_circ_0001481	Fxyd7	down	up	up
mmu-miR-204-3p	mmu_circ_0001481	Fxyd7	down	up	up
mmu-miR-384-3p	mmu_circ_0001481	Fxyd7	down	up	up
mmu-miR-449a-3p	mmu_circ_0001481	Fxyd7	down	up	up
mmu-miR-449c-5p	mmu_circ_0001481	Fxyd7	down	up	up
mmu-miR-465a-3p	mmu_circ_0001481	Fxyd7	down	up	up
mmu-miR-465b-3p	mmu_circ_0001481	Fxyd7	down	up	up
mmu-miR-465c-3p	mmu_circ_0001481	Fxyd7	down	up	up
mmu-miR-489-3p	mmu_circ_0001481	Fxyd7	down	up	up
mmu-miR-497a-3p	mmu_circ_0001481	Fxyd7	down	up	up
mmu-miR-5103	mmu_circ_0001481	Fxyd7	down	up	up
mmu-miR-653-3p	mmu_circ_0001481	Fxyd7	down	up	up
mmu-miR-653-5p	mmu_circ_0001481	Fxyd7	down	up	up
mmu-miR-7057-5p	mmu_circ_0001481	Fxyd7	down	up	up
mmu-miR-7063-3p	mmu_circ_0001481	Fxyd7	down	up	up
mmu-miR-7667-5p	mmu_circ_0001481	Fxyd7	down	up	up
mmu-miR-871-3p	mmu_circ_0001481	Fxyd7	down	up	up
mmu-miR-881-3p	mmu_circ_0001481	Fxyd7	down	up	up
mmu-miR-1199-5p	mmu_circ_0001481	Zfp976	down	up	up
mmu-miR-12191-3p	mmu_circ_0001481	Zfp976	down	up	up
mmu-miR-129-2-3p	mmu_circ_0001481	Zfp976	down	up	up
mmu-miR-129-5p	mmu_circ_0001481	Zfp976	down	up	up
mmu-miR-1298-5p	mmu_circ_0001481	Zfp976	down	up	up
mmu-miR-204-3p	mmu_circ_0001481	Zfp976	down	up	up
mmu-miR-384-3p	mmu_circ_0001481	Zfp976	down	up	up
mmu-miR-449a-3p	mmu_circ_0001481	Zfp976	down	up	up
mmu-miR-449c-5p	mmu_circ_0001481	Zfp976	down	up	up
mmu-miR-465a-3p	mmu_circ_0001481	Zfp976	down	up	up
mmu-miR-465b-3p	mmu_circ_0001481	Zfp976	down	up	up
mmu-miR-465c-3p	mmu_circ_0001481	Zfp976	down	up	up
mmu-miR-489-3p	mmu_circ_0001481	Zfp976	down	up	up
mmu-miR-497a-3p	mmu_circ_0001481	Zfp976	down	up	up
mmu-miR-5103	mmu_circ_0001481	Zfp976	down	up	up
mmu-miR-653-3p	mmu_circ_0001481	Zfp976	down	up	up
mmu-miR-653-5p	mmu_circ_0001481	Zfp976	down	up	up
mmu-miR-7057-5p	mmu_circ_0001481	Zfp976	down	up	up
mmu-miR-7063-3p	mmu_circ_0001481	Zfp976	down	up	up
mmu-miR-7661-5p	mmu_circ_0001481	Zfp976	down	up	up
mmu-miR-7667-5p	mmu_circ_0001481	Zfp976	down	up	up
mmu-miR-871-3p	mmu_circ_0001481	Zfp976	down	up	up
mmu-miR-881-3p	mmu_circ_0001481	Zfp976	down	up	up
mmu-miR-146a-3p	mmu_circ_0001879	Homer3	down	up	up
mmu-miR-3473a	mmu_circ_0001879	Homer3	down	up	up
mmu-miR-12191-3p	mmu_circ_0001508	Tle2	down	up	up
mmu-miR-129-2-3p	mmu_circ_0001508	Tle2	down	up	up
mmu-miR-465a-3p	mmu_circ_0001508	Tle2	down	up	up
mmu-miR-465b-3p	mmu_circ_0001508	Tle2	down	up	up
mmu-miR-465c-3p	mmu_circ_0001508	Tle2	down	up	up
mmu-miR-497a-3p	mmu_circ_0001508	Tle2	down	up	up
mmu-miR-7057-5p	mmu_circ_0001508	Tle2	down	up	up
mmu-miR-12191-3p	mmu_circ_0001853	Tle2	down	up	up
mmu-miR-129-2-3p	mmu_circ_0001853	Tle2	down	up	up
mmu-miR-12191-3p	mmu_circ_0001769	Tacstd2	down	up	up
mmu-miR-129-2-3p	mmu_circ_0001769	Tacstd2	down	up	up
mmu-miR-465a-3p	mmu_circ_0001769	Tacstd2	down	up	up
mmu-miR-465b-3p	mmu_circ_0001769	Tacstd2	down	up	up
mmu-miR-465c-3p	mmu_circ_0001769	Tacstd2	down	up	up
mmu-miR-146a-3p	mmu_circ_0000282	Akap2	down	up	up
mmu-miR-201-5p	mmu_circ_0000282	Akap2	down	up	up
mmu-miR-146a-3p	mmu_circ_0001414	Akap2	down	up	up
mmu-miR-201-5p	mmu_circ_0001414	Akap2	down	up	up
mmu-miR-497a-3p	mmu_circ_0001822	Large2	down	up	up
mmu-miR-12191-3p	mmu_circ_0000823	Azgp1	down	up	up
mmu-miR-129-5p	mmu_circ_0000823	Azgp1	down	up	up
mmu-miR-146a-3p	mmu_circ_0000823	Azgp1	down	up	up
mmu-miR-181d-3p	mmu_circ_0000823	Azgp1	down	up	up
mmu-miR-1912-3p	mmu_circ_0000823	Azgp1	down	up	up
mmu-miR-201-5p	mmu_circ_0000823	Azgp1	down	up	up
mmu-miR-3473a	mmu_circ_0000823	Azgp1	down	up	up
mmu-miR-384-3p	mmu_circ_0000823	Azgp1	down	up	up
mmu-miR-449a-3p	mmu_circ_0000823	Azgp1	down	up	up
mmu-miR-449c-5p	mmu_circ_0000823	Azgp1	down	up	up
mmu-miR-489-3p	mmu_circ_0000823	Azgp1	down	up	up
mmu-miR-653-5p	mmu_circ_0000823	Azgp1	down	up	up
mmu-miR-7667-5p	mmu_circ_0000823	Azgp1	down	up	up
mmu-miR-871-3p	mmu_circ_0000823	Azgp1	down	up	up
mmu-miR-881-3p	mmu_circ_0000823	Azgp1	down	up	up
mmu-miR-1193-3p	mmu_circ_0001098	Amtn	up	down	down
mmu-miR-196a-5p	mmu_circ_0001098	Amtn	up	down	down
mmu-miR-3072-3p	mmu_circ_0001098	Amtn	up	down	down
mmu-miR-376a-5p	mmu_circ_0001098	Amtn	up	down	down
mmu-miR-412-5p	mmu_circ_0001098	Amtn	up	down	down
mmu-miR-483-3p	mmu_circ_0001098	Amtn	up	down	down
mmu-miR-677-5p	mmu_circ_0001098	Amtn	up	down	down
mmu-miR-701-3p	mmu_circ_0001098	Amtn	up	down	down
mmu-miR-7240-5p	mmu_circ_0001098	Amtn	up	down	down
mmu-miR-7b-5p	mmu_circ_0001098	Amtn	up	down	down
mmu-miR-879-3p	mmu_circ_0001098	Amtn	up	down	down
mmu-miR-12191-3p	mmu_circ_0001372	Arf3	down	up	up
mmu-miR-12191-3p	mmu_circ_0001508	Map1lc3b	down	up	up
mmu-miR-129-2-3p	mmu_circ_0001508	Map1lc3b	down	up	up
mmu-miR-12191-3p	mmu_circ_0001853	Map1lc3b	down	up	up
mmu-miR-129-2-3p	mmu_circ_0001853	Map1lc3b	down	up	up
mmu-miR-146a-3p	mmu_circ_0000823	Peg3	down	up	up
mmu-miR-1912-3p	mmu_circ_0000823	Peg3	down	up	up
mmu-miR-201-5p	mmu_circ_0000823	Peg3	down	up	up
mmu-miR-3473a	mmu_circ_0000823	Peg3	down	up	up
mmu-miR-449a-3p	mmu_circ_0000823	Peg3	down	up	up
mmu-miR-449c-5p	mmu_circ_0000823	Peg3	down	up	up
mmu-miR-489-3p	mmu_circ_0000823	Peg3	down	up	up
mmu-miR-653-5p	mmu_circ_0000823	Peg3	down	up	up
mmu-miR-7667-5p	mmu_circ_0000823	Peg3	down	up	up
mmu-miR-871-3p	mmu_circ_0000823	Peg3	down	up	up
mmu-miR-881-3p	mmu_circ_0000823	Peg3	down	up	up
mmu-miR-181d-3p	mmu_circ_0001879	Phospho1	down	up	up
mmu-miR-497a-3p	mmu_circ_0001822	Pfdn2	down	up	up
mmu-miR-12191-3p	mmu_circ_0001769	Sorbs2	down	up	up
mmu-miR-129-2-3p	mmu_circ_0001769	Sorbs2	down	up	up
mmu-miR-465a-3p	mmu_circ_0001769	Sorbs2	down	up	up
mmu-miR-465b-3p	mmu_circ_0001769	Sorbs2	down	up	up
mmu-miR-465c-3p	mmu_circ_0001769	Sorbs2	down	up	up
mmu-miR-1199-5p	mmu_circ_0001481	Eif2s3y	down	up	up
mmu-miR-12191-3p	mmu_circ_0001481	Eif2s3y	down	up	up
mmu-miR-129-2-3p	mmu_circ_0001481	Eif2s3y	down	up	up
mmu-miR-129-5p	mmu_circ_0001481	Eif2s3y	down	up	up
mmu-miR-1298-5p	mmu_circ_0001481	Eif2s3y	down	up	up
mmu-miR-204-3p	mmu_circ_0001481	Eif2s3y	down	up	up
mmu-miR-384-3p	mmu_circ_0001481	Eif2s3y	down	up	up
mmu-miR-449a-3p	mmu_circ_0001481	Eif2s3y	down	up	up
mmu-miR-449c-5p	mmu_circ_0001481	Eif2s3y	down	up	up
mmu-miR-465a-3p	mmu_circ_0001481	Eif2s3y	down	up	up
mmu-miR-465b-3p	mmu_circ_0001481	Eif2s3y	down	up	up
mmu-miR-465c-3p	mmu_circ_0001481	Eif2s3y	down	up	up
mmu-miR-489-3p	mmu_circ_0001481	Eif2s3y	down	up	up
mmu-miR-497a-3p	mmu_circ_0001481	Eif2s3y	down	up	up
mmu-miR-5103	mmu_circ_0001481	Eif2s3y	down	up	up
mmu-miR-653-3p	mmu_circ_0001481	Eif2s3y	down	up	up
mmu-miR-653-5p	mmu_circ_0001481	Eif2s3y	down	up	up
mmu-miR-7057-5p	mmu_circ_0001481	Eif2s3y	down	up	up
mmu-miR-7063-3p	mmu_circ_0001481	Eif2s3y	down	up	up
mmu-miR-7661-5p	mmu_circ_0001481	Eif2s3y	down	up	up
mmu-miR-7667-5p	mmu_circ_0001481	Eif2s3y	down	up	up
mmu-miR-871-3p	mmu_circ_0001481	Eif2s3y	down	up	up
mmu-miR-881-3p	mmu_circ_0001481	Eif2s3y	down	up	up
mmu-miR-12191-3p	mmu_circ_0001372	Pear1	down	up	up
mmu-miR-465a-3p	mmu_circ_0001372	Pear1	down	up	up
mmu-miR-465b-3p	mmu_circ_0001372	Pear1	down	up	up
mmu-miR-465c-3p	mmu_circ_0001372	Pear1	down	up	up
mmu-miR-1199-5p	mmu_circ_0001481	Ablim1	down	up	up
mmu-miR-12191-3p	mmu_circ_0001481	Ablim1	down	up	up
mmu-miR-129-2-3p	mmu_circ_0001481	Ablim1	down	up	up
mmu-miR-129-5p	mmu_circ_0001481	Ablim1	down	up	up
mmu-miR-1298-5p	mmu_circ_0001481	Ablim1	down	up	up
mmu-miR-204-3p	mmu_circ_0001481	Ablim1	down	up	up
mmu-miR-384-3p	mmu_circ_0001481	Ablim1	down	up	up
mmu-miR-449a-3p	mmu_circ_0001481	Ablim1	down	up	up
mmu-miR-449c-5p	mmu_circ_0001481	Ablim1	down	up	up
mmu-miR-465a-3p	mmu_circ_0001481	Ablim1	down	up	up
mmu-miR-465b-3p	mmu_circ_0001481	Ablim1	down	up	up
mmu-miR-465c-3p	mmu_circ_0001481	Ablim1	down	up	up
mmu-miR-489-3p	mmu_circ_0001481	Ablim1	down	up	up
mmu-miR-497a-3p	mmu_circ_0001481	Ablim1	down	up	up
mmu-miR-5103	mmu_circ_0001481	Ablim1	down	up	up
mmu-miR-653-3p	mmu_circ_0001481	Ablim1	down	up	up
mmu-miR-653-5p	mmu_circ_0001481	Ablim1	down	up	up
mmu-miR-7057-5p	mmu_circ_0001481	Ablim1	down	up	up
mmu-miR-7667-5p	mmu_circ_0001481	Ablim1	down	up	up
mmu-miR-871-3p	mmu_circ_0001481	Ablim1	down	up	up
mmu-miR-881-3p	mmu_circ_0001481	Ablim1	down	up	up
mmu-miR-12191-3p	mmu_circ_0001769	Mef2c	down	up	up
mmu-miR-129-2-3p	mmu_circ_0001769	Mef2c	down	up	up
mmu-miR-465a-3p	mmu_circ_0001769	Mef2c	down	up	up
mmu-miR-465b-3p	mmu_circ_0001769	Mef2c	down	up	up
mmu-miR-465c-3p	mmu_circ_0001769	Mef2c	down	up	up
mmu-miR-12191-3p	mmu_circ_0001372	Mef2c	down	up	up
mmu-miR-465a-3p	mmu_circ_0001372	Mef2c	down	up	up
mmu-miR-465b-3p	mmu_circ_0001372	Mef2c	down	up	up
mmu-miR-465c-3p	mmu_circ_0001372	Mef2c	down	up	up
mmu-miR-12191-3p	mmu_circ_0001508	Cd81	down	up	up
mmu-miR-129-2-3p	mmu_circ_0001508	Cd81	down	up	up
mmu-miR-465a-3p	mmu_circ_0001508	Cd81	down	up	up
mmu-miR-465b-3p	mmu_circ_0001508	Cd81	down	up	up
mmu-miR-465c-3p	mmu_circ_0001508	Cd81	down	up	up
mmu-miR-497a-3p	mmu_circ_0001508	Cd81	down	up	up
mmu-miR-7057-5p	mmu_circ_0001508	Cd81	down	up	up
mmu-miR-146a-3p	mmu_circ_0000319	Dock10	down	up	up
mmu-miR-201-5p	mmu_circ_0000319	Dock10	down	up	up
mmu-miR-1199-5p	mmu_circ_0001481	Arl4d	down	up	up
mmu-miR-12191-3p	mmu_circ_0001481	Arl4d	down	up	up
mmu-miR-129-2-3p	mmu_circ_0001481	Arl4d	down	up	up
mmu-miR-129-5p	mmu_circ_0001481	Arl4d	down	up	up
mmu-miR-1298-5p	mmu_circ_0001481	Arl4d	down	up	up
mmu-miR-204-3p	mmu_circ_0001481	Arl4d	down	up	up
mmu-miR-384-3p	mmu_circ_0001481	Arl4d	down	up	up
mmu-miR-449a-3p	mmu_circ_0001481	Arl4d	down	up	up
mmu-miR-449c-5p	mmu_circ_0001481	Arl4d	down	up	up
mmu-miR-465a-3p	mmu_circ_0001481	Arl4d	down	up	up
mmu-miR-465b-3p	mmu_circ_0001481	Arl4d	down	up	up
mmu-miR-465c-3p	mmu_circ_0001481	Arl4d	down	up	up
mmu-miR-489-3p	mmu_circ_0001481	Arl4d	down	up	up
mmu-miR-497a-3p	mmu_circ_0001481	Arl4d	down	up	up
mmu-miR-5103	mmu_circ_0001481	Arl4d	down	up	up
mmu-miR-653-5p	mmu_circ_0001481	Arl4d	down	up	up
mmu-miR-7057-5p	mmu_circ_0001481	Arl4d	down	up	up
mmu-miR-7063-3p	mmu_circ_0001481	Arl4d	down	up	up
mmu-miR-7667-5p	mmu_circ_0001481	Arl4d	down	up	up
mmu-miR-871-3p	mmu_circ_0001481	Arl4d	down	up	up
mmu-miR-881-3p	mmu_circ_0001481	Arl4d	down	up	up
mmu-miR-1199-5p	mmu_circ_0001481	Cldn4	down	up	up
mmu-miR-12191-3p	mmu_circ_0001481	Cldn4	down	up	up
mmu-miR-129-2-3p	mmu_circ_0001481	Cldn4	down	up	up
mmu-miR-129-5p	mmu_circ_0001481	Cldn4	down	up	up
mmu-miR-1298-5p	mmu_circ_0001481	Cldn4	down	up	up
mmu-miR-204-3p	mmu_circ_0001481	Cldn4	down	up	up
mmu-miR-384-3p	mmu_circ_0001481	Cldn4	down	up	up
mmu-miR-449a-3p	mmu_circ_0001481	Cldn4	down	up	up
mmu-miR-449c-5p	mmu_circ_0001481	Cldn4	down	up	up
mmu-miR-465a-3p	mmu_circ_0001481	Cldn4	down	up	up
mmu-miR-465b-3p	mmu_circ_0001481	Cldn4	down	up	up
mmu-miR-465c-3p	mmu_circ_0001481	Cldn4	down	up	up
mmu-miR-489-3p	mmu_circ_0001481	Cldn4	down	up	up
mmu-miR-497a-3p	mmu_circ_0001481	Cldn4	down	up	up
mmu-miR-5103	mmu_circ_0001481	Cldn4	down	up	up
mmu-miR-653-3p	mmu_circ_0001481	Cldn4	down	up	up
mmu-miR-653-5p	mmu_circ_0001481	Cldn4	down	up	up
mmu-miR-7057-5p	mmu_circ_0001481	Cldn4	down	up	up
mmu-miR-7661-5p	mmu_circ_0001481	Cldn4	down	up	up
mmu-miR-7667-5p	mmu_circ_0001481	Cldn4	down	up	up
mmu-miR-871-3p	mmu_circ_0001481	Cldn4	down	up	up
mmu-miR-881-3p	mmu_circ_0001481	Cldn4	down	up	up
mmu-miR-12191-3p	mmu_circ_0001769	Raly	down	up	up
mmu-miR-129-2-3p	mmu_circ_0001769	Raly	down	up	up
mmu-miR-465a-3p	mmu_circ_0001769	Raly	down	up	up
mmu-miR-465b-3p	mmu_circ_0001769	Raly	down	up	up
mmu-miR-465c-3p	mmu_circ_0001769	Raly	down	up	up
mmu-miR-129-5p	mmu_circ_0001089	E4f1	down	up	up
mmu-miR-146a-3p	mmu_circ_0001089	E4f1	down	up	up
mmu-miR-201-5p	mmu_circ_0001089	E4f1	down	up	up
mmu-miR-204-3p	mmu_circ_0001089	E4f1	down	up	up
mmu-miR-384-3p	mmu_circ_0001089	E4f1	down	up	up
mmu-miR-449a-3p	mmu_circ_0001089	E4f1	down	up	up
mmu-miR-5103	mmu_circ_0001089	E4f1	down	up	up
mmu-miR-653-5p	mmu_circ_0001089	E4f1	down	up	up
mmu-miR-7667-5p	mmu_circ_0001089	E4f1	down	up	up
mmu-miR-871-3p	mmu_circ_0001089	E4f1	down	up	up
mmu-miR-881-3p	mmu_circ_0001089	E4f1	down	up	up
mmu-miR-12191-3p	mmu_circ_0000823	Gramd1a	down	up	up
mmu-miR-129-5p	mmu_circ_0000823	Gramd1a	down	up	up
mmu-miR-146a-3p	mmu_circ_0000823	Gramd1a	down	up	up
mmu-miR-1912-3p	mmu_circ_0000823	Gramd1a	down	up	up
mmu-miR-201-5p	mmu_circ_0000823	Gramd1a	down	up	up
mmu-miR-3473a	mmu_circ_0000823	Gramd1a	down	up	up
mmu-miR-384-3p	mmu_circ_0000823	Gramd1a	down	up	up
mmu-miR-449a-3p	mmu_circ_0000823	Gramd1a	down	up	up
mmu-miR-449c-5p	mmu_circ_0000823	Gramd1a	down	up	up
mmu-miR-489-3p	mmu_circ_0000823	Gramd1a	down	up	up
mmu-miR-653-5p	mmu_circ_0000823	Gramd1a	down	up	up
mmu-miR-7667-5p	mmu_circ_0000823	Gramd1a	down	up	up
mmu-miR-871-3p	mmu_circ_0000823	Gramd1a	down	up	up
mmu-miR-881-3p	mmu_circ_0000823	Gramd1a	down	up	up
mmu-miR-12191-3p	mmu_circ_0001769	Cdipt	down	up	up
mmu-miR-129-2-3p	mmu_circ_0001769	Cdipt	down	up	up
mmu-miR-465a-3p	mmu_circ_0001769	Cdipt	down	up	up
mmu-miR-465b-3p	mmu_circ_0001769	Cdipt	down	up	up
mmu-miR-465c-3p	mmu_circ_0001769	Cdipt	down	up	up
mmu-miR-12191-3p	mmu_circ_0001372	Cdipt	down	up	up
mmu-miR-465a-3p	mmu_circ_0001372	Cdipt	down	up	up
mmu-miR-465b-3p	mmu_circ_0001372	Cdipt	down	up	up
mmu-miR-465c-3p	mmu_circ_0001372	Cdipt	down	up	up
mmu-miR-1199-5p	mmu_circ_0001089	Psmd4	down	up	up
mmu-miR-129-5p	mmu_circ_0001089	Psmd4	down	up	up
mmu-miR-1298-5p	mmu_circ_0001089	Psmd4	down	up	up
mmu-miR-146a-3p	mmu_circ_0001089	Psmd4	down	up	up
mmu-miR-201-5p	mmu_circ_0001089	Psmd4	down	up	up
mmu-miR-204-3p	mmu_circ_0001089	Psmd4	down	up	up
mmu-miR-384-3p	mmu_circ_0001089	Psmd4	down	up	up
mmu-miR-449a-3p	mmu_circ_0001089	Psmd4	down	up	up
mmu-miR-5103	mmu_circ_0001089	Psmd4	down	up	up
mmu-miR-653-5p	mmu_circ_0001089	Psmd4	down	up	up
mmu-miR-871-3p	mmu_circ_0001089	Psmd4	down	up	up
mmu-miR-881-3p	mmu_circ_0001089	Psmd4	down	up	up
mmu-miR-497a-3p	mmu_circ_0000632	Calu	down	up	up
mmu-miR-5103	mmu_circ_0000632	Calu	down	up	up
mmu-miR-497a-3p	mmu_circ_0000040	Calu	down	up	up
mmu-miR-5103	mmu_circ_0000040	Calu	down	up	up
mmu-miR-12191-3p	mmu_circ_0001508	Lamc3	down	up	up
mmu-miR-129-2-3p	mmu_circ_0001508	Lamc3	down	up	up
mmu-miR-465a-3p	mmu_circ_0001508	Lamc3	down	up	up
mmu-miR-465b-3p	mmu_circ_0001508	Lamc3	down	up	up
mmu-miR-465c-3p	mmu_circ_0001508	Lamc3	down	up	up
mmu-miR-497a-3p	mmu_circ_0001508	Lamc3	down	up	up
mmu-miR-12191-3p	mmu_circ_0001853	Ermard	down	up	up
mmu-miR-129-2-3p	mmu_circ_0001853	Ermard	down	up	up
mmu-miR-12191-3p	mmu_circ_0001372	Zfp961	down	up	up
mmu-miR-12191-3p	mmu_circ_0001508	Gsta3	down	up	up
mmu-miR-129-2-3p	mmu_circ_0001508	Gsta3	down	up	up
mmu-miR-465a-3p	mmu_circ_0001508	Gsta3	down	up	up
mmu-miR-465b-3p	mmu_circ_0001508	Gsta3	down	up	up
mmu-miR-465c-3p	mmu_circ_0001508	Gsta3	down	up	up
mmu-miR-12191-3p	mmu_circ_0001853	Gsta3	down	up	up
mmu-miR-129-2-3p	mmu_circ_0001853	Gsta3	down	up	up
mmu-miR-497a-3p	mmu_circ_0001822	Plekhg1	down	up	up
mmu-miR-146a-3p	mmu_circ_0000319	Btbd3	down	up	up
mmu-miR-201-5p	mmu_circ_0000319	Btbd3	down	up	up
mmu-miR-146a-3p	mmu_circ_0000282	Btbd3	down	up	up
mmu-miR-201-5p	mmu_circ_0000282	Btbd3	down	up	up
mmu-miR-146a-3p	mmu_circ_0001414	Btbd3	down	up	up
mmu-miR-201-5p	mmu_circ_0001414	Btbd3	down	up	up
mmu-miR-1193-3p	mmu_circ_0001098	Cox5a	up	down	down
mmu-miR-196a-5p	mmu_circ_0001098	Cox5a	up	down	down
mmu-miR-3072-3p	mmu_circ_0001098	Cox5a	up	down	down
mmu-miR-376a-5p	mmu_circ_0001098	Cox5a	up	down	down
mmu-miR-412-5p	mmu_circ_0001098	Cox5a	up	down	down
mmu-miR-483-3p	mmu_circ_0001098	Cox5a	up	down	down
mmu-miR-677-5p	mmu_circ_0001098	Cox5a	up	down	down
mmu-miR-701-3p	mmu_circ_0001098	Cox5a	up	down	down
mmu-miR-7240-5p	mmu_circ_0001098	Cox5a	up	down	down
mmu-miR-7b-5p	mmu_circ_0001098	Cox5a	up	down	down
mmu-miR-879-3p	mmu_circ_0001098	Cox5a	up	down	down
mmu-miR-12191-3p	mmu_circ_0000823	Neu3	down	up	up
mmu-miR-146a-3p	mmu_circ_0000823	Neu3	down	up	up
mmu-miR-181d-3p	mmu_circ_0000823	Neu3	down	up	up
mmu-miR-1912-3p	mmu_circ_0000823	Neu3	down	up	up
mmu-miR-201-5p	mmu_circ_0000823	Neu3	down	up	up
mmu-miR-3473a	mmu_circ_0000823	Neu3	down	up	up
mmu-miR-384-3p	mmu_circ_0000823	Neu3	down	up	up
mmu-miR-449a-3p	mmu_circ_0000823	Neu3	down	up	up
mmu-miR-449c-5p	mmu_circ_0000823	Neu3	down	up	up
mmu-miR-489-3p	mmu_circ_0000823	Neu3	down	up	up
mmu-miR-653-5p	mmu_circ_0000823	Neu3	down	up	up
mmu-miR-7667-5p	mmu_circ_0000823	Neu3	down	up	up
mmu-miR-871-3p	mmu_circ_0000823	Neu3	down	up	up
mmu-miR-881-3p	mmu_circ_0000823	Neu3	down	up	up
mmu-miR-196a-1-3p	mmu_circ_0000884	Coq8b	up	down	down
mmu-miR-196a-5p	mmu_circ_0000884	Coq8b	up	down	down
mmu-miR-483-3p	mmu_circ_0000884	Coq8b	up	down	down
mmu-miR-7240-5p	mmu_circ_0000884	Coq8b	up	down	down
mmu-miR-497a-3p	mmu_circ_0001295	Smc6	down	up	up
mmu-miR-5103	mmu_circ_0001295	Smc6	down	up	up
mmu-miR-497a-3p	mmu_circ_0000141	Smc6	down	up	up
mmu-miR-497a-3p	mmu_circ_0000632	Smc6	down	up	up
mmu-miR-5103	mmu_circ_0000632	Smc6	down	up	up
mmu-miR-497a-3p	mmu_circ_0000040	Smc6	down	up	up
mmu-miR-5103	mmu_circ_0000040	Smc6	down	up	up
mmu-miR-1199-5p	mmu_circ_0001481	Rin2	down	up	up
mmu-miR-12191-3p	mmu_circ_0001481	Rin2	down	up	up
mmu-miR-129-2-3p	mmu_circ_0001481	Rin2	down	up	up
mmu-miR-129-5p	mmu_circ_0001481	Rin2	down	up	up
mmu-miR-1298-5p	mmu_circ_0001481	Rin2	down	up	up
mmu-miR-204-3p	mmu_circ_0001481	Rin2	down	up	up
mmu-miR-384-3p	mmu_circ_0001481	Rin2	down	up	up
mmu-miR-449a-3p	mmu_circ_0001481	Rin2	down	up	up
mmu-miR-449c-5p	mmu_circ_0001481	Rin2	down	up	up
mmu-miR-465a-3p	mmu_circ_0001481	Rin2	down	up	up
mmu-miR-465b-3p	mmu_circ_0001481	Rin2	down	up	up
mmu-miR-465c-3p	mmu_circ_0001481	Rin2	down	up	up
mmu-miR-489-3p	mmu_circ_0001481	Rin2	down	up	up
mmu-miR-497a-3p	mmu_circ_0001481	Rin2	down	up	up
mmu-miR-5103	mmu_circ_0001481	Rin2	down	up	up
mmu-miR-653-5p	mmu_circ_0001481	Rin2	down	up	up
mmu-miR-7057-5p	mmu_circ_0001481	Rin2	down	up	up
mmu-miR-7063-3p	mmu_circ_0001481	Rin2	down	up	up
mmu-miR-7661-5p	mmu_circ_0001481	Rin2	down	up	up
mmu-miR-7667-5p	mmu_circ_0001481	Rin2	down	up	up
mmu-miR-871-3p	mmu_circ_0001481	Rin2	down	up	up
mmu-miR-881-3p	mmu_circ_0001481	Rin2	down	up	up
mmu-miR-376a-3p	mmu_circ_0001256	Fgd2	up	down	down
mmu-miR-879-3p	mmu_circ_0001256	Fgd2	up	down	down
mmu-miR-12191-3p	mmu_circ_0001508	Cntln	down	up	up
mmu-miR-129-2-3p	mmu_circ_0001508	Cntln	down	up	up
mmu-miR-465a-3p	mmu_circ_0001508	Cntln	down	up	up
mmu-miR-465b-3p	mmu_circ_0001508	Cntln	down	up	up
mmu-miR-465c-3p	mmu_circ_0001508	Cntln	down	up	up
mmu-miR-497a-3p	mmu_circ_0001508	Cntln	down	up	up
mmu-miR-376a-3p	mmu_circ_0001256	Eps15l1	up	down	down
mmu-miR-879-3p	mmu_circ_0001256	Eps15l1	up	down	down
mmu-miR-12191-3p	mmu_circ_0000823	Trib1	down	up	up
mmu-miR-129-5p	mmu_circ_0000823	Trib1	down	up	up
mmu-miR-146a-3p	mmu_circ_0000823	Trib1	down	up	up
mmu-miR-181d-3p	mmu_circ_0000823	Trib1	down	up	up
mmu-miR-1912-3p	mmu_circ_0000823	Trib1	down	up	up
mmu-miR-201-5p	mmu_circ_0000823	Trib1	down	up	up
mmu-miR-3473a	mmu_circ_0000823	Trib1	down	up	up
mmu-miR-449a-3p	mmu_circ_0000823	Trib1	down	up	up
mmu-miR-449c-5p	mmu_circ_0000823	Trib1	down	up	up
mmu-miR-489-3p	mmu_circ_0000823	Trib1	down	up	up
mmu-miR-653-5p	mmu_circ_0000823	Trib1	down	up	up
mmu-miR-7667-5p	mmu_circ_0000823	Trib1	down	up	up
mmu-miR-871-3p	mmu_circ_0000823	Trib1	down	up	up
mmu-miR-881-3p	mmu_circ_0000823	Trib1	down	up	up
mmu-miR-146a-3p	mmu_circ_0000319	Tfe3	down	up	up
mmu-miR-201-5p	mmu_circ_0000319	Tfe3	down	up	up
mmu-miR-12191-3p	mmu_circ_0001774	4930562C15Rik	down	up	up
mmu-miR-129-2-3p	mmu_circ_0001774	4930562C15Rik	down	up	up
mmu-miR-146a-3p	mmu_circ_0001774	4930562C15Rik	down	up	up
mmu-miR-181d-3p	mmu_circ_0001774	4930562C15Rik	down	up	up
mmu-miR-1912-3p	mmu_circ_0001774	4930562C15Rik	down	up	up
mmu-miR-201-5p	mmu_circ_0001774	4930562C15Rik	down	up	up
mmu-miR-3473a	mmu_circ_0001774	4930562C15Rik	down	up	up
mmu-miR-449a-3p	mmu_circ_0001774	4930562C15Rik	down	up	up
mmu-miR-449c-5p	mmu_circ_0001774	4930562C15Rik	down	up	up
mmu-miR-653-5p	mmu_circ_0001774	4930562C15Rik	down	up	up
mmu-miR-7057-5p	mmu_circ_0001774	4930562C15Rik	down	up	up
mmu-miR-7063-3p	mmu_circ_0001774	4930562C15Rik	down	up	up
mmu-miR-7667-5p	mmu_circ_0001774	4930562C15Rik	down	up	up
mmu-miR-881-3p	mmu_circ_0001774	4930562C15Rik	down	up	up
mmu-miR-497a-3p	mmu_circ_0000632	Il18r1	down	up	up
mmu-miR-5103	mmu_circ_0000632	Il18r1	down	up	up
mmu-miR-497a-3p	mmu_circ_0000040	Il18r1	down	up	up
mmu-miR-5103	mmu_circ_0000040	Il18r1	down	up	up
mmu-miR-12191-3p	mmu_circ_0001894	Capg	down	up	up
mmu-miR-465a-3p	mmu_circ_0001894	Capg	down	up	up
mmu-miR-465b-3p	mmu_circ_0001894	Capg	down	up	up
mmu-miR-465b-5p	mmu_circ_0001894	Capg	down	up	up
mmu-miR-465c-3p	mmu_circ_0001894	Capg	down	up	up
mmu-miR-489-3p	mmu_circ_0001894	Capg	down	up	up
mmu-miR-6481	mmu_circ_0001894	Capg	down	up	up
mmu-miR-7661-5p	mmu_circ_0001894	Capg	down	up	up
mmu-miR-12191-3p	mmu_circ_0001508	Orc3	down	up	up
mmu-miR-129-2-3p	mmu_circ_0001508	Orc3	down	up	up
mmu-miR-12191-3p	mmu_circ_0001853	Orc3	down	up	up
mmu-miR-129-2-3p	mmu_circ_0001853	Orc3	down	up	up
mmu-miR-1199-5p	mmu_circ_0001481	Ctnnd1	down	up	up
mmu-miR-12191-3p	mmu_circ_0001481	Ctnnd1	down	up	up
mmu-miR-129-2-3p	mmu_circ_0001481	Ctnnd1	down	up	up
mmu-miR-129-5p	mmu_circ_0001481	Ctnnd1	down	up	up
mmu-miR-1298-5p	mmu_circ_0001481	Ctnnd1	down	up	up
mmu-miR-204-3p	mmu_circ_0001481	Ctnnd1	down	up	up
mmu-miR-384-3p	mmu_circ_0001481	Ctnnd1	down	up	up
mmu-miR-449a-3p	mmu_circ_0001481	Ctnnd1	down	up	up
mmu-miR-449c-5p	mmu_circ_0001481	Ctnnd1	down	up	up
mmu-miR-465a-3p	mmu_circ_0001481	Ctnnd1	down	up	up
mmu-miR-465b-3p	mmu_circ_0001481	Ctnnd1	down	up	up
mmu-miR-465c-3p	mmu_circ_0001481	Ctnnd1	down	up	up
mmu-miR-489-3p	mmu_circ_0001481	Ctnnd1	down	up	up
mmu-miR-497a-3p	mmu_circ_0001481	Ctnnd1	down	up	up
mmu-miR-5103	mmu_circ_0001481	Ctnnd1	down	up	up
mmu-miR-653-3p	mmu_circ_0001481	Ctnnd1	down	up	up
mmu-miR-653-5p	mmu_circ_0001481	Ctnnd1	down	up	up
mmu-miR-7057-5p	mmu_circ_0001481	Ctnnd1	down	up	up
mmu-miR-7063-3p	mmu_circ_0001481	Ctnnd1	down	up	up
mmu-miR-7667-5p	mmu_circ_0001481	Ctnnd1	down	up	up
mmu-miR-871-3p	mmu_circ_0001481	Ctnnd1	down	up	up
mmu-miR-881-3p	mmu_circ_0001481	Ctnnd1	down	up	up
mmu-miR-146a-3p	mmu_circ_0001879	Fam109a	down	up	up
mmu-miR-181d-3p	mmu_circ_0001879	Fam109a	down	up	up
mmu-miR-3473a	mmu_circ_0001879	Fam109a	down	up	up
mmu-miR-146a-3p	mmu_circ_0001768	Fam109a	down	up	up
mmu-miR-181d-3p	mmu_circ_0001768	Fam109a	down	up	up
mmu-miR-1912-3p	mmu_circ_0001768	Fam109a	down	up	up
mmu-miR-201-5p	mmu_circ_0001768	Fam109a	down	up	up
mmu-miR-3473a	mmu_circ_0001768	Fam109a	down	up	up
mmu-miR-7667-5p	mmu_circ_0001768	Fam109a	down	up	up
mmu-miR-12191-3p	mmu_circ_0001372	Coq7	down	up	up
mmu-miR-465a-3p	mmu_circ_0001372	Coq7	down	up	up
mmu-miR-465b-3p	mmu_circ_0001372	Coq7	down	up	up
mmu-miR-465c-3p	mmu_circ_0001372	Coq7	down	up	up
mmu-miR-146a-3p	mmu_circ_0001879	Mark2	down	up	up
mmu-miR-181d-3p	mmu_circ_0001879	Mark2	down	up	up
mmu-miR-3473a	mmu_circ_0001879	Mark2	down	up	up
mmu-miR-12191-3p	mmu_circ_0001768	Mark2	down	up	up
mmu-miR-146a-3p	mmu_circ_0001768	Mark2	down	up	up
mmu-miR-181d-3p	mmu_circ_0001768	Mark2	down	up	up
mmu-miR-1912-3p	mmu_circ_0001768	Mark2	down	up	up
mmu-miR-3473a	mmu_circ_0001768	Mark2	down	up	up
mmu-miR-7667-5p	mmu_circ_0001768	Mark2	down	up	up
mmu-miR-1193-3p	mmu_circ_0001098	Pole2	up	down	down
mmu-miR-196a-5p	mmu_circ_0001098	Pole2	up	down	down
mmu-miR-3072-3p	mmu_circ_0001098	Pole2	up	down	down
mmu-miR-376a-5p	mmu_circ_0001098	Pole2	up	down	down
mmu-miR-412-5p	mmu_circ_0001098	Pole2	up	down	down
mmu-miR-483-3p	mmu_circ_0001098	Pole2	up	down	down
mmu-miR-677-5p	mmu_circ_0001098	Pole2	up	down	down
mmu-miR-701-3p	mmu_circ_0001098	Pole2	up	down	down
mmu-miR-7240-5p	mmu_circ_0001098	Pole2	up	down	down
mmu-miR-7b-5p	mmu_circ_0001098	Pole2	up	down	down
mmu-miR-879-3p	mmu_circ_0001098	Pole2	up	down	down
mmu-miR-12191-3p	mmu_circ_0001508	Lox	down	up	up
mmu-miR-129-2-3p	mmu_circ_0001508	Lox	down	up	up
mmu-miR-465a-3p	mmu_circ_0001508	Lox	down	up	up
mmu-miR-465b-3p	mmu_circ_0001508	Lox	down	up	up
mmu-miR-465c-3p	mmu_circ_0001508	Lox	down	up	up
mmu-miR-7057-5p	mmu_circ_0001508	Lox	down	up	up
mmu-miR-12191-3p	mmu_circ_0001853	Lox	down	up	up
mmu-miR-129-2-3p	mmu_circ_0001853	Lox	down	up	up
mmu-miR-1199-5p	mmu_circ_0001089	Eif3d	down	up	up
mmu-miR-129-5p	mmu_circ_0001089	Eif3d	down	up	up
mmu-miR-1298-5p	mmu_circ_0001089	Eif3d	down	up	up
mmu-miR-146a-3p	mmu_circ_0001089	Eif3d	down	up	up
mmu-miR-201-5p	mmu_circ_0001089	Eif3d	down	up	up
mmu-miR-204-3p	mmu_circ_0001089	Eif3d	down	up	up
mmu-miR-384-3p	mmu_circ_0001089	Eif3d	down	up	up
mmu-miR-449a-3p	mmu_circ_0001089	Eif3d	down	up	up
mmu-miR-449c-5p	mmu_circ_0001089	Eif3d	down	up	up
mmu-miR-489-3p	mmu_circ_0001089	Eif3d	down	up	up
mmu-miR-5103	mmu_circ_0001089	Eif3d	down	up	up
mmu-miR-653-5p	mmu_circ_0001089	Eif3d	down	up	up
mmu-miR-7667-5p	mmu_circ_0001089	Eif3d	down	up	up
mmu-miR-871-3p	mmu_circ_0001089	Eif3d	down	up	up
mmu-miR-881-3p	mmu_circ_0001089	Eif3d	down	up	up
mmu-miR-12191-3p	mmu_circ_0000351	Gpr146	down	up	up
mmu-miR-129-2-3p	mmu_circ_0000351	Gpr146	down	up	up
mmu-miR-204-3p	mmu_circ_0000351	Gpr146	down	up	up
mmu-miR-465a-3p	mmu_circ_0000351	Gpr146	down	up	up
mmu-miR-465b-3p	mmu_circ_0000351	Gpr146	down	up	up
mmu-miR-465b-5p	mmu_circ_0000351	Gpr146	down	up	up
mmu-miR-465c-3p	mmu_circ_0000351	Gpr146	down	up	up
mmu-miR-489-3p	mmu_circ_0000351	Gpr146	down	up	up
mmu-miR-6481	mmu_circ_0000351	Gpr146	down	up	up
mmu-miR-7661-5p	mmu_circ_0000351	Gpr146	down	up	up
mmu-miR-871-3p	mmu_circ_0000351	Gpr146	down	up	up
mmu-miR-1199-5p	mmu_circ_0001089	Uty	down	up	up
mmu-miR-129-5p	mmu_circ_0001089	Uty	down	up	up
mmu-miR-146a-3p	mmu_circ_0001089	Uty	down	up	up
mmu-miR-201-5p	mmu_circ_0001089	Uty	down	up	up
mmu-miR-204-3p	mmu_circ_0001089	Uty	down	up	up
mmu-miR-384-3p	mmu_circ_0001089	Uty	down	up	up
mmu-miR-449a-3p	mmu_circ_0001089	Uty	down	up	up
mmu-miR-5103	mmu_circ_0001089	Uty	down	up	up
mmu-miR-653-5p	mmu_circ_0001089	Uty	down	up	up
mmu-miR-871-3p	mmu_circ_0001089	Uty	down	up	up
mmu-miR-881-3p	mmu_circ_0001089	Uty	down	up	up
mmu-miR-12191-3p	mmu_circ_0001508	Man2a2	down	up	up
mmu-miR-129-2-3p	mmu_circ_0001508	Man2a2	down	up	up
mmu-miR-465a-3p	mmu_circ_0001508	Man2a2	down	up	up
mmu-miR-465b-3p	mmu_circ_0001508	Man2a2	down	up	up
mmu-miR-465c-3p	mmu_circ_0001508	Man2a2	down	up	up
mmu-miR-12191-3p	mmu_circ_0001853	Man2a2	down	up	up
mmu-miR-129-2-3p	mmu_circ_0001853	Man2a2	down	up	up
mmu-miR-12191-3p	mmu_circ_0000351	Dnajb12	down	up	up
mmu-miR-129-2-3p	mmu_circ_0000351	Dnajb12	down	up	up
mmu-miR-204-3p	mmu_circ_0000351	Dnajb12	down	up	up
mmu-miR-465a-3p	mmu_circ_0000351	Dnajb12	down	up	up
mmu-miR-465b-3p	mmu_circ_0000351	Dnajb12	down	up	up
mmu-miR-465b-5p	mmu_circ_0000351	Dnajb12	down	up	up
mmu-miR-465c-3p	mmu_circ_0000351	Dnajb12	down	up	up
mmu-miR-489-3p	mmu_circ_0000351	Dnajb12	down	up	up
mmu-miR-6481	mmu_circ_0000351	Dnajb12	down	up	up
mmu-miR-7661-5p	mmu_circ_0000351	Dnajb12	down	up	up
mmu-miR-871-3p	mmu_circ_0000351	Dnajb12	down	up	up
mmu-miR-1199-5p	mmu_circ_0000325	Add1	down	up	up
mmu-miR-12191-3p	mmu_circ_0000325	Add1	down	up	up
mmu-miR-1298-3p	mmu_circ_0000325	Add1	down	up	up
mmu-miR-449c-5p	mmu_circ_0000325	Add1	down	up	up
mmu-miR-466f	mmu_circ_0000325	Add1	down	up	up
mmu-miR-5624-5p	mmu_circ_0000325	Add1	down	up	up
mmu-miR-7057-5p	mmu_circ_0000325	Add1	down	up	up
mmu-miR-497a-3p	mmu_circ_0001295	Jade2	down	up	up
mmu-miR-5103	mmu_circ_0001295	Jade2	down	up	up
mmu-miR-497a-3p	mmu_circ_0000632	Jade2	down	up	up
mmu-miR-5103	mmu_circ_0000632	Jade2	down	up	up
mmu-miR-497a-3p	mmu_circ_0000040	Jade2	down	up	up
mmu-miR-5103	mmu_circ_0000040	Jade2	down	up	up
mmu-miR-12191-3p	mmu_circ_0000351	Ccdc30	down	up	up
mmu-miR-129-2-3p	mmu_circ_0000351	Ccdc30	down	up	up
mmu-miR-204-3p	mmu_circ_0000351	Ccdc30	down	up	up
mmu-miR-465a-3p	mmu_circ_0000351	Ccdc30	down	up	up
mmu-miR-465b-3p	mmu_circ_0000351	Ccdc30	down	up	up
mmu-miR-465b-5p	mmu_circ_0000351	Ccdc30	down	up	up
mmu-miR-465c-3p	mmu_circ_0000351	Ccdc30	down	up	up
mmu-miR-489-3p	mmu_circ_0000351	Ccdc30	down	up	up
mmu-miR-6481	mmu_circ_0000351	Ccdc30	down	up	up
mmu-miR-7661-5p	mmu_circ_0000351	Ccdc30	down	up	up
mmu-miR-871-3p	mmu_circ_0000351	Ccdc30	down	up	up
mmu-miR-1199-5p	mmu_circ_0001481	Atp2b1	down	up	up
mmu-miR-12191-3p	mmu_circ_0001481	Atp2b1	down	up	up
mmu-miR-129-2-3p	mmu_circ_0001481	Atp2b1	down	up	up
mmu-miR-129-5p	mmu_circ_0001481	Atp2b1	down	up	up
mmu-miR-1298-5p	mmu_circ_0001481	Atp2b1	down	up	up
mmu-miR-204-3p	mmu_circ_0001481	Atp2b1	down	up	up
mmu-miR-384-3p	mmu_circ_0001481	Atp2b1	down	up	up
mmu-miR-449a-3p	mmu_circ_0001481	Atp2b1	down	up	up
mmu-miR-449c-5p	mmu_circ_0001481	Atp2b1	down	up	up
mmu-miR-465a-3p	mmu_circ_0001481	Atp2b1	down	up	up
mmu-miR-465b-3p	mmu_circ_0001481	Atp2b1	down	up	up
mmu-miR-465c-3p	mmu_circ_0001481	Atp2b1	down	up	up
mmu-miR-489-3p	mmu_circ_0001481	Atp2b1	down	up	up
mmu-miR-497a-3p	mmu_circ_0001481	Atp2b1	down	up	up
mmu-miR-5103	mmu_circ_0001481	Atp2b1	down	up	up
mmu-miR-653-3p	mmu_circ_0001481	Atp2b1	down	up	up
mmu-miR-653-5p	mmu_circ_0001481	Atp2b1	down	up	up
mmu-miR-7057-5p	mmu_circ_0001481	Atp2b1	down	up	up
mmu-miR-7063-3p	mmu_circ_0001481	Atp2b1	down	up	up
mmu-miR-7667-5p	mmu_circ_0001481	Atp2b1	down	up	up
mmu-miR-871-3p	mmu_circ_0001481	Atp2b1	down	up	up
mmu-miR-881-3p	mmu_circ_0001481	Atp2b1	down	up	up
mmu-miR-12191-3p	mmu_circ_0001769	Xpo7	down	up	up
mmu-miR-129-2-3p	mmu_circ_0001769	Xpo7	down	up	up
mmu-miR-12191-3p	mmu_circ_0001508	Tmem176a	down	up	up
mmu-miR-129-2-3p	mmu_circ_0001508	Tmem176a	down	up	up
mmu-miR-12191-3p	mmu_circ_0001853	Tmem176a	down	up	up
mmu-miR-129-2-3p	mmu_circ_0001853	Tmem176a	down	up	up
mmu-miR-1193-3p	mmu_circ_0001098	Gemin6	up	down	down
mmu-miR-196a-5p	mmu_circ_0001098	Gemin6	up	down	down
mmu-miR-3072-3p	mmu_circ_0001098	Gemin6	up	down	down
mmu-miR-376a-5p	mmu_circ_0001098	Gemin6	up	down	down
mmu-miR-412-5p	mmu_circ_0001098	Gemin6	up	down	down
mmu-miR-483-3p	mmu_circ_0001098	Gemin6	up	down	down
mmu-miR-677-5p	mmu_circ_0001098	Gemin6	up	down	down
mmu-miR-701-3p	mmu_circ_0001098	Gemin6	up	down	down
mmu-miR-7240-5p	mmu_circ_0001098	Gemin6	up	down	down
mmu-miR-146a-3p	mmu_circ_0000823	Proser2	down	up	up
mmu-miR-181d-3p	mmu_circ_0000823	Proser2	down	up	up
mmu-miR-1912-3p	mmu_circ_0000823	Proser2	down	up	up
mmu-miR-201-5p	mmu_circ_0000823	Proser2	down	up	up
mmu-miR-3473a	mmu_circ_0000823	Proser2	down	up	up
mmu-miR-449a-3p	mmu_circ_0000823	Proser2	down	up	up
mmu-miR-449c-5p	mmu_circ_0000823	Proser2	down	up	up
mmu-miR-653-5p	mmu_circ_0000823	Proser2	down	up	up
mmu-miR-7667-5p	mmu_circ_0000823	Proser2	down	up	up
mmu-miR-871-3p	mmu_circ_0000823	Proser2	down	up	up
mmu-miR-881-3p	mmu_circ_0000823	Proser2	down	up	up
mmu-miR-12191-3p	mmu_circ_0001768	Dopey2	down	up	up
mmu-miR-146a-3p	mmu_circ_0001768	Dopey2	down	up	up
mmu-miR-181d-3p	mmu_circ_0001768	Dopey2	down	up	up
mmu-miR-1912-3p	mmu_circ_0001768	Dopey2	down	up	up
mmu-miR-201-5p	mmu_circ_0001768	Dopey2	down	up	up
mmu-miR-3473a	mmu_circ_0001768	Dopey2	down	up	up
mmu-miR-449c-5p	mmu_circ_0001768	Dopey2	down	up	up
mmu-miR-7667-5p	mmu_circ_0001768	Dopey2	down	up	up
mmu-miR-881-3p	mmu_circ_0001768	Dopey2	down	up	up
mmu-miR-146a-3p	mmu_circ_0001879	Dpf2	down	up	up
mmu-miR-3473a	mmu_circ_0001879	Dpf2	down	up	up
mmu-miR-146a-3p	mmu_circ_0001768	Dpf2	down	up	up
mmu-miR-201-5p	mmu_circ_0001768	Dpf2	down	up	up
mmu-miR-3473a	mmu_circ_0001768	Dpf2	down	up	up
mmu-miR-12191-3p	mmu_circ_0001508	Mkl2	down	up	up
mmu-miR-129-2-3p	mmu_circ_0001508	Mkl2	down	up	up
mmu-miR-12191-3p	mmu_circ_0001853	Mkl2	down	up	up
mmu-miR-129-2-3p	mmu_circ_0001853	Mkl2	down	up	up
mmu-miR-12191-3p	mmu_circ_0001769	1190007I07Rik	down	up	up
mmu-miR-129-2-3p	mmu_circ_0001769	1190007I07Rik	down	up	up
mmu-miR-465a-3p	mmu_circ_0001769	1190007I07Rik	down	up	up
mmu-miR-465b-3p	mmu_circ_0001769	1190007I07Rik	down	up	up
mmu-miR-465c-3p	mmu_circ_0001769	1190007I07Rik	down	up	up
mmu-miR-12191-3p	mmu_circ_0001508	Cul2	down	up	up
mmu-miR-129-2-3p	mmu_circ_0001508	Cul2	down	up	up
mmu-miR-465a-3p	mmu_circ_0001508	Cul2	down	up	up
mmu-miR-465b-3p	mmu_circ_0001508	Cul2	down	up	up
mmu-miR-465c-3p	mmu_circ_0001508	Cul2	down	up	up
mmu-miR-12191-3p	mmu_circ_0001853	Cul2	down	up	up
mmu-miR-129-2-3p	mmu_circ_0001853	Cul2	down	up	up
mmu-miR-497a-3p	mmu_circ_0001295	Zkscan1	down	up	up
mmu-miR-5103	mmu_circ_0001295	Zkscan1	down	up	up
mmu-miR-497a-3p	mmu_circ_0000632	Zkscan1	down	up	up
mmu-miR-5103	mmu_circ_0000632	Zkscan1	down	up	up
mmu-miR-497a-3p	mmu_circ_0000040	Zkscan1	down	up	up
mmu-miR-5103	mmu_circ_0000040	Zkscan1	down	up	up
mmu-miR-1199-5p	mmu_circ_0001089	Zfp458	down	up	up
mmu-miR-129-5p	mmu_circ_0001089	Zfp458	down	up	up
mmu-miR-146a-3p	mmu_circ_0001089	Zfp458	down	up	up
mmu-miR-201-5p	mmu_circ_0001089	Zfp458	down	up	up
mmu-miR-204-3p	mmu_circ_0001089	Zfp458	down	up	up
mmu-miR-384-3p	mmu_circ_0001089	Zfp458	down	up	up
mmu-miR-449a-3p	mmu_circ_0001089	Zfp458	down	up	up
mmu-miR-449c-5p	mmu_circ_0001089	Zfp458	down	up	up
mmu-miR-489-3p	mmu_circ_0001089	Zfp458	down	up	up
mmu-miR-5103	mmu_circ_0001089	Zfp458	down	up	up
mmu-miR-653-5p	mmu_circ_0001089	Zfp458	down	up	up
mmu-miR-871-3p	mmu_circ_0001089	Zfp458	down	up	up
mmu-miR-881-3p	mmu_circ_0001089	Zfp458	down	up	up
mmu-miR-1199-5p	mmu_circ_0001481	Snx21	down	up	up
mmu-miR-12191-3p	mmu_circ_0001481	Snx21	down	up	up
mmu-miR-129-2-3p	mmu_circ_0001481	Snx21	down	up	up
mmu-miR-129-5p	mmu_circ_0001481	Snx21	down	up	up
mmu-miR-1298-5p	mmu_circ_0001481	Snx21	down	up	up
mmu-miR-204-3p	mmu_circ_0001481	Snx21	down	up	up
mmu-miR-384-3p	mmu_circ_0001481	Snx21	down	up	up
mmu-miR-449a-3p	mmu_circ_0001481	Snx21	down	up	up
mmu-miR-449c-5p	mmu_circ_0001481	Snx21	down	up	up
mmu-miR-465a-3p	mmu_circ_0001481	Snx21	down	up	up
mmu-miR-465b-3p	mmu_circ_0001481	Snx21	down	up	up
mmu-miR-465c-3p	mmu_circ_0001481	Snx21	down	up	up
mmu-miR-489-3p	mmu_circ_0001481	Snx21	down	up	up
mmu-miR-497a-3p	mmu_circ_0001481	Snx21	down	up	up
mmu-miR-5103	mmu_circ_0001481	Snx21	down	up	up
mmu-miR-653-3p	mmu_circ_0001481	Snx21	down	up	up
mmu-miR-653-5p	mmu_circ_0001481	Snx21	down	up	up
mmu-miR-7057-5p	mmu_circ_0001481	Snx21	down	up	up
mmu-miR-7063-3p	mmu_circ_0001481	Snx21	down	up	up
mmu-miR-7667-5p	mmu_circ_0001481	Snx21	down	up	up
mmu-miR-871-3p	mmu_circ_0001481	Snx21	down	up	up
mmu-miR-881-3p	mmu_circ_0001481	Snx21	down	up	up
mmu-miR-12191-3p	mmu_circ_0001508	Eef2	down	up	up
mmu-miR-129-2-3p	mmu_circ_0001508	Eef2	down	up	up
mmu-miR-465a-3p	mmu_circ_0001508	Eef2	down	up	up
mmu-miR-465b-3p	mmu_circ_0001508	Eef2	down	up	up
mmu-miR-465c-3p	mmu_circ_0001508	Eef2	down	up	up
mmu-miR-497a-3p	mmu_circ_0001508	Eef2	down	up	up
mmu-miR-7057-5p	mmu_circ_0001508	Eef2	down	up	up
mmu-miR-1199-5p	mmu_circ_0001481	Rapgef6	down	up	up
mmu-miR-12191-3p	mmu_circ_0001481	Rapgef6	down	up	up
mmu-miR-129-2-3p	mmu_circ_0001481	Rapgef6	down	up	up
mmu-miR-129-5p	mmu_circ_0001481	Rapgef6	down	up	up
mmu-miR-1298-5p	mmu_circ_0001481	Rapgef6	down	up	up
mmu-miR-204-3p	mmu_circ_0001481	Rapgef6	down	up	up
mmu-miR-384-3p	mmu_circ_0001481	Rapgef6	down	up	up
mmu-miR-449a-3p	mmu_circ_0001481	Rapgef6	down	up	up
mmu-miR-449c-5p	mmu_circ_0001481	Rapgef6	down	up	up
mmu-miR-465a-3p	mmu_circ_0001481	Rapgef6	down	up	up
mmu-miR-465b-3p	mmu_circ_0001481	Rapgef6	down	up	up
mmu-miR-465c-3p	mmu_circ_0001481	Rapgef6	down	up	up
mmu-miR-489-3p	mmu_circ_0001481	Rapgef6	down	up	up
mmu-miR-497a-3p	mmu_circ_0001481	Rapgef6	down	up	up
mmu-miR-5103	mmu_circ_0001481	Rapgef6	down	up	up
mmu-miR-653-5p	mmu_circ_0001481	Rapgef6	down	up	up
mmu-miR-7057-5p	mmu_circ_0001481	Rapgef6	down	up	up
mmu-miR-7063-3p	mmu_circ_0001481	Rapgef6	down	up	up
mmu-miR-7667-5p	mmu_circ_0001481	Rapgef6	down	up	up
mmu-miR-871-3p	mmu_circ_0001481	Rapgef6	down	up	up
mmu-miR-881-3p	mmu_circ_0001481	Rapgef6	down	up	up
mmu-miR-146a-3p	mmu_circ_0000319	Gfra4	down	up	up
mmu-miR-201-5p	mmu_circ_0000319	Gfra4	down	up	up
mmu-miR-146a-3p	mmu_circ_0000282	Gfra4	down	up	up
mmu-miR-201-5p	mmu_circ_0000282	Gfra4	down	up	up
mmu-miR-146a-3p	mmu_circ_0001414	Gfra4	down	up	up
mmu-miR-201-5p	mmu_circ_0001414	Gfra4	down	up	up
mmu-miR-146a-3p	mmu_circ_0000319	Txnrd3	down	up	up
mmu-miR-201-5p	mmu_circ_0000319	Txnrd3	down	up	up
mmu-miR-12191-3p	mmu_circ_0001894	Plagl1	down	up	up
mmu-miR-465a-3p	mmu_circ_0001894	Plagl1	down	up	up
mmu-miR-465b-3p	mmu_circ_0001894	Plagl1	down	up	up
mmu-miR-465b-5p	mmu_circ_0001894	Plagl1	down	up	up
mmu-miR-465c-3p	mmu_circ_0001894	Plagl1	down	up	up
mmu-miR-489-3p	mmu_circ_0001894	Plagl1	down	up	up
mmu-miR-6481	mmu_circ_0001894	Plagl1	down	up	up
mmu-miR-7661-5p	mmu_circ_0001894	Plagl1	down	up	up
mmu-miR-1199-5p	mmu_circ_0001089	Map3k10	down	up	up
mmu-miR-129-5p	mmu_circ_0001089	Map3k10	down	up	up
mmu-miR-146a-3p	mmu_circ_0001089	Map3k10	down	up	up
mmu-miR-201-5p	mmu_circ_0001089	Map3k10	down	up	up
mmu-miR-384-3p	mmu_circ_0001089	Map3k10	down	up	up
mmu-miR-449a-3p	mmu_circ_0001089	Map3k10	down	up	up
mmu-miR-449c-5p	mmu_circ_0001089	Map3k10	down	up	up
mmu-miR-653-5p	mmu_circ_0001089	Map3k10	down	up	up
mmu-miR-881-3p	mmu_circ_0001089	Map3k10	down	up	up
mmu-miR-1199-5p	mmu_circ_0000325	Zfp36	down	up	up
mmu-miR-12191-3p	mmu_circ_0000325	Zfp36	down	up	up
mmu-miR-1298-3p	mmu_circ_0000325	Zfp36	down	up	up
mmu-miR-449c-5p	mmu_circ_0000325	Zfp36	down	up	up
mmu-miR-466f	mmu_circ_0000325	Zfp36	down	up	up
mmu-miR-5624-5p	mmu_circ_0000325	Zfp36	down	up	up
mmu-miR-7057-5p	mmu_circ_0000325	Zfp36	down	up	up
mmu-miR-1193-3p	mmu_circ_0001098	Rbm25	up	down	down
mmu-miR-196a-5p	mmu_circ_0001098	Rbm25	up	down	down
mmu-miR-3072-3p	mmu_circ_0001098	Rbm25	up	down	down
mmu-miR-376a-5p	mmu_circ_0001098	Rbm25	up	down	down
mmu-miR-412-5p	mmu_circ_0001098	Rbm25	up	down	down
mmu-miR-483-3p	mmu_circ_0001098	Rbm25	up	down	down
mmu-miR-677-5p	mmu_circ_0001098	Rbm25	up	down	down
mmu-miR-701-3p	mmu_circ_0001098	Rbm25	up	down	down
mmu-miR-7240-5p	mmu_circ_0001098	Rbm25	up	down	down
mmu-miR-7b-5p	mmu_circ_0001098	Rbm25	up	down	down
mmu-miR-879-3p	mmu_circ_0001098	Rbm25	up	down	down
mmu-miR-12191-3p	mmu_circ_0001508	Atg7	down	up	up
mmu-miR-129-2-3p	mmu_circ_0001508	Atg7	down	up	up
mmu-miR-497a-3p	mmu_circ_0001508	Atg7	down	up	up
mmu-miR-7057-5p	mmu_circ_0001508	Atg7	down	up	up
mmu-miR-1199-5p	mmu_circ_0001481	Klf9	down	up	up
mmu-miR-12191-3p	mmu_circ_0001481	Klf9	down	up	up
mmu-miR-129-2-3p	mmu_circ_0001481	Klf9	down	up	up
mmu-miR-129-5p	mmu_circ_0001481	Klf9	down	up	up
mmu-miR-1298-5p	mmu_circ_0001481	Klf9	down	up	up
mmu-miR-204-3p	mmu_circ_0001481	Klf9	down	up	up
mmu-miR-384-3p	mmu_circ_0001481	Klf9	down	up	up
mmu-miR-449a-3p	mmu_circ_0001481	Klf9	down	up	up
mmu-miR-449c-5p	mmu_circ_0001481	Klf9	down	up	up
mmu-miR-465a-3p	mmu_circ_0001481	Klf9	down	up	up
mmu-miR-465b-3p	mmu_circ_0001481	Klf9	down	up	up
mmu-miR-465c-3p	mmu_circ_0001481	Klf9	down	up	up
mmu-miR-489-3p	mmu_circ_0001481	Klf9	down	up	up
mmu-miR-497a-3p	mmu_circ_0001481	Klf9	down	up	up
mmu-miR-5103	mmu_circ_0001481	Klf9	down	up	up
mmu-miR-653-5p	mmu_circ_0001481	Klf9	down	up	up
mmu-miR-7057-5p	mmu_circ_0001481	Klf9	down	up	up
mmu-miR-7661-5p	mmu_circ_0001481	Klf9	down	up	up
mmu-miR-7667-5p	mmu_circ_0001481	Klf9	down	up	up
mmu-miR-871-3p	mmu_circ_0001481	Klf9	down	up	up
mmu-miR-881-3p	mmu_circ_0001481	Klf9	down	up	up
mmu-miR-12191-3p	mmu_circ_0001768	Sema6a	down	up	up
mmu-miR-146a-3p	mmu_circ_0001768	Sema6a	down	up	up
mmu-miR-181d-3p	mmu_circ_0001768	Sema6a	down	up	up
mmu-miR-1912-3p	mmu_circ_0001768	Sema6a	down	up	up
mmu-miR-201-5p	mmu_circ_0001768	Sema6a	down	up	up
mmu-miR-3473a	mmu_circ_0001768	Sema6a	down	up	up
mmu-miR-449c-5p	mmu_circ_0001768	Sema6a	down	up	up
mmu-miR-7667-5p	mmu_circ_0001768	Sema6a	down	up	up
mmu-miR-881-3p	mmu_circ_0001768	Sema6a	down	up	up
mmu-miR-12191-3p	mmu_circ_0001768	Vrk3	down	up	up
mmu-miR-146a-3p	mmu_circ_0001768	Vrk3	down	up	up
mmu-miR-181d-3p	mmu_circ_0001768	Vrk3	down	up	up
mmu-miR-1912-3p	mmu_circ_0001768	Vrk3	down	up	up
mmu-miR-201-5p	mmu_circ_0001768	Vrk3	down	up	up
mmu-miR-3473a	mmu_circ_0001768	Vrk3	down	up	up
mmu-miR-449c-5p	mmu_circ_0001768	Vrk3	down	up	up
mmu-miR-7667-5p	mmu_circ_0001768	Vrk3	down	up	up
mmu-miR-881-3p	mmu_circ_0001768	Vrk3	down	up	up
mmu-miR-1199-5p	mmu_circ_0001089	Adh1	down	up	up
mmu-miR-129-5p	mmu_circ_0001089	Adh1	down	up	up
mmu-miR-1298-5p	mmu_circ_0001089	Adh1	down	up	up
mmu-miR-146a-3p	mmu_circ_0001089	Adh1	down	up	up
mmu-miR-201-5p	mmu_circ_0001089	Adh1	down	up	up
mmu-miR-384-3p	mmu_circ_0001089	Adh1	down	up	up
mmu-miR-449a-3p	mmu_circ_0001089	Adh1	down	up	up
mmu-miR-449c-5p	mmu_circ_0001089	Adh1	down	up	up
mmu-miR-5103	mmu_circ_0001089	Adh1	down	up	up
mmu-miR-653-5p	mmu_circ_0001089	Adh1	down	up	up
mmu-miR-7667-5p	mmu_circ_0001089	Adh1	down	up	up
mmu-miR-871-3p	mmu_circ_0001089	Adh1	down	up	up
mmu-miR-881-3p	mmu_circ_0001089	Adh1	down	up	up

## Sheet: UC-MSC circRNA-miRNA-mRN
miRNA	circRNA	symbol	reg_miRNA	reg_mRNA	reg_circRNA
mmu-miR-129-1-3p	mmu_circ_0000180	Lims2	down	up	up
mmu-miR-129-1-3p	mmu_circ_0000180	Rbpms	down	up	up
mmu-miR-129-1-3p	mmu_circ_0000180	Tbc1d5	down	up	up
mmu-miR-129-1-3p	mmu_circ_0001879	Bbc3	down	up	up
mmu-miR-129-1-3p	mmu_circ_0000282	Ehmt2	down	up	up
mmu-miR-129-1-3p	mmu_circ_0000282	Eif2ak3	down	up	up
mmu-miR-129-1-3p	mmu_circ_0000282	Nusap1	down	up	up
mmu-miR-129-1-3p	mmu_circ_0000282	Cdk13	down	up	up
mmu-miR-129-1-3p	mmu_circ_0001414	Ehmt2	down	up	up
mmu-miR-129-1-3p	mmu_circ_0001414	Eif2ak3	down	up	up
mmu-miR-129-1-3p	mmu_circ_0001414	Nusap1	down	up	up
mmu-miR-129-1-3p	mmu_circ_0001414	Cdk13	down	up	up
mmu-miR-129-1-3p	mmu_circ_0000462	Eml1	down	up	up
mmu-miR-129-1-3p	mmu_circ_0000462	Poc1b	down	up	up
mmu-miR-129-1-3p	mmu_circ_0000462	Hyou1	down	up	up
mmu-miR-129-1-3p	mmu_circ_0000462	Fam151b	down	up	up
mmu-miR-129-5p	mmu_circ_0000351	Il1r2	down	up	up
mmu-miR-129-5p	mmu_circ_0000351	Ms4a8a	down	up	up
mmu-miR-129-5p	mmu_circ_0000351	Itgal	down	up	up
mmu-miR-129-5p	mmu_circ_0000351	Rbbp7	down	up	up
mmu-miR-129-5p	mmu_circ_0000351	Cyp4f18	down	up	up
mmu-miR-129-5p	mmu_circ_0000351	Gpr146	down	up	up
mmu-miR-129-5p	mmu_circ_0000351	R3hdm2	down	up	up
mmu-miR-129-5p	mmu_circ_0001089	Adh1	down	up	up
mmu-miR-129-5p	mmu_circ_0001089	Dchs1	down	up	up
mmu-miR-129-5p	mmu_circ_0001089	Ccdc114	down	up	up
mmu-miR-135a-5p	mmu_circ_0000180	Vrk3	down	up	up
mmu-miR-135a-5p	mmu_circ_0000180	Tbc1d5	down	up	up
mmu-miR-135a-5p	mmu_circ_0000180	Cacnb3	down	up	up
mmu-miR-135a-5p	mmu_circ_0000180	Lims2	down	up	up
mmu-miR-135a-5p	mmu_circ_0000180	Rbpms	down	up	up
mmu-miR-135a-5p	mmu_circ_0000180	Pxk	down	up	up
mmu-miR-135a-5p	mmu_circ_0000351	Il1r2	down	up	up
mmu-miR-135a-5p	mmu_circ_0000351	Ms4a8a	down	up	up
mmu-miR-135a-5p	mmu_circ_0000351	Itgal	down	up	up
mmu-miR-135a-5p	mmu_circ_0000351	Upk1b	down	up	up
mmu-miR-135a-5p	mmu_circ_0000351	Rbbp7	down	up	up
mmu-miR-135a-5p	mmu_circ_0000351	Cyp4f18	down	up	up
mmu-miR-135a-5p	mmu_circ_0000351	Gpr146	down	up	up
mmu-miR-135a-5p	mmu_circ_0000351	R3hdm2	down	up	up
mmu-miR-135a-5p	mmu_circ_0000375	Cldn23	down	up	up
mmu-miR-135a-5p	mmu_circ_0000375	Larp1b	down	up	up
mmu-miR-135a-5p	mmu_circ_0000181	Vrk3	down	up	up
mmu-miR-135a-5p	mmu_circ_0000181	Tbc1d5	down	up	up
mmu-miR-135a-5p	mmu_circ_0000181	Cacnb3	down	up	up
mmu-miR-135a-5p	mmu_circ_0000181	Rbpms	down	up	up
mmu-miR-135a-5p	mmu_circ_0001894	Phf21a	down	up	up
mmu-miR-135a-5p	mmu_circ_0000477	Selenoo	down	up	up
mmu-miR-135a-5p	mmu_circ_0000477	Raly	down	up	up
mmu-miR-135a-5p	mmu_circ_0000477	Trak1	down	up	up
mmu-miR-135a-5p	mmu_circ_0001089	Dchs1	down	up	up
mmu-miR-135a-5p	mmu_circ_0001089	Ccdc114	down	up	up
mmu-miR-135a-5p	mmu_circ_0001089	Adh1	down	up	up
mmu-miR-139-3p	mmu_circ_0000243	Ano1	up	down	down
mmu-miR-139-3p	mmu_circ_0000243	Lrp6	up	down	down
mmu-miR-139-3p	mmu_circ_0000243	Nol12	up	down	down
mmu-miR-139-3p	mmu_circ_0000243	Abraxas2	up	down	down
mmu-miR-139-3p	mmu_circ_0000243	Dna2	up	down	down
mmu-miR-139-3p	mmu_circ_0000243	Tecpr1	up	down	down
mmu-miR-139-3p	mmu_circ_0000243	Zfp493	up	down	down
mmu-miR-139-3p	mmu_circ_0000243	Eno3	up	down	down
mmu-miR-139-3p	mmu_circ_0000243	Ttc8	up	down	down
mmu-miR-139-3p	mmu_circ_0000243	Cacnb1	up	down	down
mmu-miR-139-3p	mmu_circ_0000243	Myo5a	up	down	down
mmu-miR-139-3p	mmu_circ_0000243	Ppbp	up	down	down
mmu-miR-139-3p	mmu_circ_0000243	Msh3	up	down	down
mmu-miR-139-3p	mmu_circ_0000243	Pcdhgb4	up	down	down
mmu-miR-139-3p	mmu_circ_0000328	Mdfic	up	down	down
mmu-miR-139-3p	mmu_circ_0000328	Sema6d	up	down	down
mmu-miR-139-3p	mmu_circ_0000328	Sorbs1	up	down	down
mmu-miR-139-3p	mmu_circ_0000328	Zdhhc6	up	down	down
mmu-miR-139-3p	mmu_circ_0000328	Ptpn1	up	down	down
mmu-miR-139-3p	mmu_circ_0000328	Rfx1	up	down	down
mmu-miR-139-3p	mmu_circ_0000328	Ciita	up	down	down
mmu-miR-139-3p	mmu_circ_0000328	Lrrn2	up	down	down
mmu-miR-139-3p	mmu_circ_0000328	Fermt3	up	down	down
mmu-miR-139-3p	mmu_circ_0000328	Ptprs	up	down	down
mmu-miR-139-3p	mmu_circ_0000013	Inpp5a	up	down	down
mmu-miR-139-3p	mmu_circ_0000013	Arhgef25	up	down	down
mmu-miR-139-3p	mmu_circ_0000013	Pnpla3	up	down	down
mmu-miR-139-3p	mmu_circ_0000013	Rbpms	up	down	down
mmu-miR-139-3p	mmu_circ_0001256	Ngef	up	down	down
mmu-miR-146b-5p	mmu_circ_0000462	Eml1	down	up	up
mmu-miR-146b-5p	mmu_circ_0000462	Fam151b	down	up	up
mmu-miR-146b-5p	mmu_circ_0000462	Hyou1	down	up	up
mmu-miR-1933-3p	mmu_circ_0001256	Ngef	up	down	down
mmu-miR-1948-5p	mmu_circ_0001089	Ccdc114	down	up	up
mmu-miR-1948-5p	mmu_circ_0001089	Adh1	down	up	up
mmu-miR-1948-5p	mmu_circ_0001089	Dchs1	down	up	up
mmu-miR-1948-5p	mmu_circ_0000804	Ptbp2	down	up	up
mmu-miR-1948-5p	mmu_circ_0000804	Zfp91	down	up	up
mmu-miR-1948-5p	mmu_circ_0000804	Mif4gd	down	up	up
mmu-miR-1948-5p	mmu_circ_0000804	Patl1	down	up	up
mmu-miR-1948-5p	mmu_circ_0000804	Dtnb	down	up	up
mmu-miR-1956	mmu_circ_0000180	Cacnb3	down	up	up
mmu-miR-1956	mmu_circ_0000180	Pxk	down	up	up
mmu-miR-1956	mmu_circ_0000180	Tbc1d5	down	up	up
mmu-miR-1956	mmu_circ_0000180	Rbpms	down	up	up
mmu-miR-1956	mmu_circ_0000180	Vrk3	down	up	up
mmu-miR-1956	mmu_circ_0000375	Cldn23	down	up	up
mmu-miR-1956	mmu_circ_0000181	Cacnb3	down	up	up
mmu-miR-1956	mmu_circ_0000181	Tbc1d5	down	up	up
mmu-miR-1956	mmu_circ_0000181	Rbpms	down	up	up
mmu-miR-1956	mmu_circ_0000181	Vrk3	down	up	up
mmu-miR-1956	mmu_circ_0000462	Fam151b	down	up	up
mmu-miR-1956	mmu_circ_0000462	Eml1	down	up	up
mmu-miR-1956	mmu_circ_0000462	Poc1b	down	up	up
mmu-miR-1956	mmu_circ_0000462	Hyou1	down	up	up
mmu-miR-196a-5p	mmu_circ_0000243	Cacnb1	up	down	down
mmu-miR-196a-5p	mmu_circ_0000243	Pcdhgb4	up	down	down
mmu-miR-196a-5p	mmu_circ_0000243	Ttc8	up	down	down
mmu-miR-196a-5p	mmu_circ_0000243	Msh3	up	down	down
mmu-miR-196a-5p	mmu_circ_0000243	Abraxas2	up	down	down
mmu-miR-196a-5p	mmu_circ_0000243	Tecpr1	up	down	down
mmu-miR-196a-5p	mmu_circ_0000243	Ano1	up	down	down
mmu-miR-196a-5p	mmu_circ_0000243	Nol12	up	down	down
mmu-miR-196a-5p	mmu_circ_0000243	Zfp493	up	down	down
mmu-miR-196a-5p	mmu_circ_0000243	Eno3	up	down	down
mmu-miR-196a-5p	mmu_circ_0000243	Myo5a	up	down	down
mmu-miR-196a-5p	mmu_circ_0000243	Dna2	up	down	down
mmu-miR-196a-5p	mmu_circ_0000243	Lrp6	up	down	down
mmu-miR-196a-5p	mmu_circ_0000243	Ppbp	up	down	down
mmu-miR-196a-5p	mmu_circ_0000328	Lrrn2	up	down	down
mmu-miR-196a-5p	mmu_circ_0000328	Sorbs1	up	down	down
mmu-miR-196a-5p	mmu_circ_0000328	Ptpn1	up	down	down
mmu-miR-196a-5p	mmu_circ_0000328	Rfx1	up	down	down
mmu-miR-196a-5p	mmu_circ_0000328	Mdfic	up	down	down
mmu-miR-196a-5p	mmu_circ_0000328	Sema6d	up	down	down
mmu-miR-196a-5p	mmu_circ_0000013	Rbpms	up	down	down
mmu-miR-196a-5p	mmu_circ_0000013	Inpp5a	up	down	down
mmu-miR-196a-5p	mmu_circ_0000013	Arhgef25	up	down	down
mmu-miR-196a-5p	mmu_circ_0000013	Pnpla3	up	down	down
mmu-miR-196a-5p	mmu_circ_0001471	Nrxn1	up	down	down
mmu-miR-196a-5p	mmu_circ_0001471	Anln	up	down	down
mmu-miR-206-3p	mmu_circ_0001256	Ngef	up	down	down
mmu-miR-28b	mmu_circ_0001295	1700017B05Rik	down	up	up
mmu-miR-28b	mmu_circ_0001295	Zer1	down	up	up
mmu-miR-28b	mmu_circ_0001295	Jade2	down	up	up
mmu-miR-28b	mmu_circ_0001295	Usp6nl	down	up	up
mmu-miR-28b	mmu_circ_0001295	Mbnl1	down	up	up
mmu-miR-28b	mmu_circ_0001370	Atp8a1	down	up	up
mmu-miR-28b	mmu_circ_0001822	Large2	down	up	up
mmu-miR-28b	mmu_circ_0001822	Atp8a1	down	up	up
mmu-miR-28b	mmu_circ_0001822	Emp3	down	up	up
mmu-miR-28b	mmu_circ_0001679	Atp8a1	down	up	up
mmu-miR-28b	mmu_circ_0001676	Lilr4b	down	up	up
mmu-miR-28b	mmu_circ_0001676	Ech1	down	up	up
mmu-miR-28b	mmu_circ_0001676	Limk1	down	up	up
mmu-miR-3072-3p	mmu_circ_0000243	Eno3	up	down	down
mmu-miR-3072-3p	mmu_circ_0000243	Zfp493	up	down	down
mmu-miR-3072-3p	mmu_circ_0000243	Myo5a	up	down	down
mmu-miR-3072-3p	mmu_circ_0000243	Tecpr1	up	down	down
mmu-miR-3072-3p	mmu_circ_0000243	Ttc8	up	down	down
mmu-miR-3072-3p	mmu_circ_0000243	Cacnb1	up	down	down
mmu-miR-3072-3p	mmu_circ_0000243	Ano1	up	down	down
mmu-miR-3072-3p	mmu_circ_0000243	Lrp6	up	down	down
mmu-miR-3072-3p	mmu_circ_0000243	Msh3	up	down	down
mmu-miR-3072-3p	mmu_circ_0000243	Pcdhgb4	up	down	down
mmu-miR-3072-3p	mmu_circ_0000243	Dna2	up	down	down
mmu-miR-3072-3p	mmu_circ_0000243	Abraxas2	up	down	down
mmu-miR-3072-3p	mmu_circ_0000243	Ppbp	up	down	down
mmu-miR-3072-3p	mmu_circ_0000243	Nol12	up	down	down
mmu-miR-3072-3p	mmu_circ_0000628	Tcf7l2	up	down	down
mmu-miR-3072-3p	mmu_circ_0000628	N4bp2l1	up	down	down
mmu-miR-3072-3p	mmu_circ_0000628	Magix	up	down	down
mmu-miR-3072-3p	mmu_circ_0000328	Fermt3	up	down	down
mmu-miR-3072-3p	mmu_circ_0000328	Sorbs1	up	down	down
mmu-miR-3072-3p	mmu_circ_0000328	Lrrn2	up	down	down
mmu-miR-3072-3p	mmu_circ_0000328	Zdhhc6	up	down	down
mmu-miR-3072-3p	mmu_circ_0000328	Mdfic	up	down	down
mmu-miR-3072-3p	mmu_circ_0000328	Ptprs	up	down	down
mmu-miR-3072-3p	mmu_circ_0000328	Sema6d	up	down	down
mmu-miR-3072-3p	mmu_circ_0000328	Rfx1	up	down	down
mmu-miR-3072-3p	mmu_circ_0000328	Ptpn1	up	down	down
mmu-miR-3082-5p	mmu_circ_0000243	Ttc8	up	down	down
mmu-miR-3082-5p	mmu_circ_0000243	Cacnb1	up	down	down
mmu-miR-3082-5p	mmu_circ_0000243	Pcdhgb4	up	down	down
mmu-miR-3082-5p	mmu_circ_0000243	Tecpr1	up	down	down
mmu-miR-3082-5p	mmu_circ_0000243	Msh3	up	down	down
mmu-miR-3082-5p	mmu_circ_0000243	Nol12	up	down	down
mmu-miR-3082-5p	mmu_circ_0000243	Zfp493	up	down	down
mmu-miR-3082-5p	mmu_circ_0000243	Abraxas2	up	down	down
mmu-miR-3082-5p	mmu_circ_0000243	Ano1	up	down	down
mmu-miR-3082-5p	mmu_circ_0000243	Eno3	up	down	down
mmu-miR-3082-5p	mmu_circ_0000243	Myo5a	up	down	down
mmu-miR-3082-5p	mmu_circ_0000243	Lrp6	up	down	down
mmu-miR-3082-5p	mmu_circ_0000243	Ppbp	up	down	down
mmu-miR-3082-5p	mmu_circ_0000243	Dna2	up	down	down
mmu-miR-3082-5p	mmu_circ_0000328	Lrrn2	up	down	down
mmu-miR-3082-5p	mmu_circ_0000328	Mdfic	up	down	down
mmu-miR-3082-5p	mmu_circ_0000328	Sorbs1	up	down	down
mmu-miR-3082-5p	mmu_circ_0000328	Sema6d	up	down	down
mmu-miR-3082-5p	mmu_circ_0000328	Rfx1	up	down	down
mmu-miR-3082-5p	mmu_circ_0000328	Ptpn1	up	down	down
mmu-miR-3082-5p	mmu_circ_0000328	Zdhhc6	up	down	down
mmu-miR-3082-5p	mmu_circ_0000328	Fermt3	up	down	down
mmu-miR-3082-5p	mmu_circ_0000328	Ciita	up	down	down
mmu-miR-3082-5p	mmu_circ_0000328	Ptprs	up	down	down
mmu-miR-3082-5p	mmu_circ_0000013	Rbpms	up	down	down
mmu-miR-3082-5p	mmu_circ_0000013	Inpp5a	up	down	down
mmu-miR-3082-5p	mmu_circ_0000013	Arhgef25	up	down	down
mmu-miR-3082-5p	mmu_circ_0000013	Pnpla3	up	down	down
mmu-miR-3097-5p	mmu_circ_0000243	Myo5a	up	down	down
mmu-miR-3097-5p	mmu_circ_0000243	Ano1	up	down	down
mmu-miR-3097-5p	mmu_circ_0000243	Ppbp	up	down	down
mmu-miR-3097-5p	mmu_circ_0000243	Lrp6	up	down	down
mmu-miR-3097-5p	mmu_circ_0000243	Nol12	up	down	down
mmu-miR-3097-5p	mmu_circ_0000243	Abraxas2	up	down	down
mmu-miR-3097-5p	mmu_circ_0000243	Tecpr1	up	down	down
mmu-miR-3097-5p	mmu_circ_0000243	Zfp493	up	down	down
mmu-miR-3097-5p	mmu_circ_0000243	Eno3	up	down	down
mmu-miR-3097-5p	mmu_circ_0000243	Pcdhgb4	up	down	down
mmu-miR-3097-5p	mmu_circ_0000243	Ttc8	up	down	down
mmu-miR-3097-5p	mmu_circ_0000243	Cacnb1	up	down	down
mmu-miR-3097-5p	mmu_circ_0000243	Msh3	up	down	down
mmu-miR-3097-5p	mmu_circ_0000243	Dna2	up	down	down
mmu-miR-3097-5p	mmu_circ_0000328	Lrrn2	up	down	down
mmu-miR-3097-5p	mmu_circ_0000328	Ptprs	up	down	down
mmu-miR-3097-5p	mmu_circ_0000328	Sorbs1	up	down	down
mmu-miR-3097-5p	mmu_circ_0000328	Sema6d	up	down	down
mmu-miR-3097-5p	mmu_circ_0000328	Fermt3	up	down	down
mmu-miR-3097-5p	mmu_circ_0000328	Ptpn1	up	down	down
mmu-miR-3097-5p	mmu_circ_0000328	Mdfic	up	down	down
mmu-miR-3097-5p	mmu_circ_0000328	Rfx1	up	down	down
mmu-miR-3097-5p	mmu_circ_0000328	Zdhhc6	up	down	down
mmu-miR-3097-5p	mmu_circ_0000013	Rbpms	up	down	down
mmu-miR-3097-5p	mmu_circ_0000013	Inpp5a	up	down	down
mmu-miR-3097-5p	mmu_circ_0000013	Arhgef25	up	down	down
mmu-miR-3097-5p	mmu_circ_0000013	Pnpla3	up	down	down
mmu-miR-3097-5p	mmu_circ_0001256	Ngef	up	down	down
mmu-miR-3099-3p	mmu_circ_0000243	Ttc8	up	down	down
mmu-miR-3099-3p	mmu_circ_0000243	Cacnb1	up	down	down
mmu-miR-3099-3p	mmu_circ_0000243	Lrp6	up	down	down
mmu-miR-3099-3p	mmu_circ_0000243	Msh3	up	down	down
mmu-miR-3099-3p	mmu_circ_0000243	Pcdhgb4	up	down	down
mmu-miR-3099-3p	mmu_circ_0000243	Nol12	up	down	down
mmu-miR-3099-3p	mmu_circ_0000243	Abraxas2	up	down	down
mmu-miR-3099-3p	mmu_circ_0000243	Zfp493	up	down	down
mmu-miR-3099-3p	mmu_circ_0000243	Eno3	up	down	down
mmu-miR-3099-3p	mmu_circ_0000243	Ppbp	up	down	down
mmu-miR-3099-3p	mmu_circ_0000243	Dna2	up	down	down
mmu-miR-3099-3p	mmu_circ_0000628	Magix	up	down	down
mmu-miR-3099-3p	mmu_circ_0000628	N4bp2l1	up	down	down
mmu-miR-3099-3p	mmu_circ_0000628	Tcf7l2	up	down	down
mmu-miR-376c-5p	mmu_circ_0000628	N4bp2l1	up	down	down
mmu-miR-376c-5p	mmu_circ_0000628	Tcf7l2	up	down	down
mmu-miR-376c-5p	mmu_circ_0000628	Magix	up	down	down
mmu-miR-376c-5p	mmu_circ_0001471	Nrxn1	up	down	down
mmu-miR-376c-5p	mmu_circ_0001471	Anln	up	down	down
mmu-miR-380-5p	mmu_circ_0000243	Ttc8	up	down	down
mmu-miR-380-5p	mmu_circ_0000243	Pcdhgb4	up	down	down
mmu-miR-380-5p	mmu_circ_0000243	Abraxas2	up	down	down
mmu-miR-380-5p	mmu_circ_0000243	Tecpr1	up	down	down
mmu-miR-380-5p	mmu_circ_0000243	Cacnb1	up	down	down
mmu-miR-380-5p	mmu_circ_0000243	Msh3	up	down	down
mmu-miR-380-5p	mmu_circ_0000243	Dna2	up	down	down
mmu-miR-380-5p	mmu_circ_0000243	Zfp493	up	down	down
mmu-miR-380-5p	mmu_circ_0000243	Eno3	up	down	down
mmu-miR-380-5p	mmu_circ_0000243	Ano1	up	down	down
mmu-miR-380-5p	mmu_circ_0000243	Lrp6	up	down	down
mmu-miR-380-5p	mmu_circ_0000243	Myo5a	up	down	down
mmu-miR-380-5p	mmu_circ_0000243	Nol12	up	down	down
mmu-miR-380-5p	mmu_circ_0000243	Ppbp	up	down	down
mmu-miR-380-5p	mmu_circ_0000628	N4bp2l1	up	down	down
mmu-miR-380-5p	mmu_circ_0000628	Tcf7l2	up	down	down
mmu-miR-380-5p	mmu_circ_0000628	Magix	up	down	down
mmu-miR-380-5p	mmu_circ_0000328	Sorbs1	up	down	down
mmu-miR-380-5p	mmu_circ_0000328	Mdfic	up	down	down
mmu-miR-380-5p	mmu_circ_0000328	Lrrn2	up	down	down
mmu-miR-380-5p	mmu_circ_0000328	Ptpn1	up	down	down
mmu-miR-380-5p	mmu_circ_0000328	Rfx1	up	down	down
mmu-miR-380-5p	mmu_circ_0000328	Zdhhc6	up	down	down
mmu-miR-380-5p	mmu_circ_0000328	Fermt3	up	down	down
mmu-miR-380-5p	mmu_circ_0000328	Sema6d	up	down	down
mmu-miR-380-5p	mmu_circ_0000328	Ptprs	up	down	down
mmu-miR-380-5p	mmu_circ_0000328	Ciita	up	down	down
mmu-miR-380-5p	mmu_circ_0000013	Rbpms	up	down	down
mmu-miR-380-5p	mmu_circ_0000013	Inpp5a	up	down	down
mmu-miR-380-5p	mmu_circ_0000013	Arhgef25	up	down	down
mmu-miR-380-5p	mmu_circ_0000013	Pnpla3	up	down	down
mmu-miR-380-5p	mmu_circ_0001471	Nrxn1	up	down	down
mmu-miR-380-5p	mmu_circ_0001471	Anln	up	down	down
mmu-miR-449a-3p	mmu_circ_0000462	Fam151b	down	up	up
mmu-miR-449a-3p	mmu_circ_0000462	Eml1	down	up	up
mmu-miR-449a-3p	mmu_circ_0000462	Hyou1	down	up	up
mmu-miR-449c-5p	mmu_circ_0001508	Upk1b	down	up	up
mmu-miR-449c-5p	mmu_circ_0001508	Klhdc8a	down	up	up
mmu-miR-449c-5p	mmu_circ_0001508	Man2a2	down	up	up
mmu-miR-449c-5p	mmu_circ_0001508	Cul2	down	up	up
mmu-miR-449c-5p	mmu_circ_0001508	Eef2	down	up	up
mmu-miR-449c-5p	mmu_circ_0000180	Cacnb3	down	up	up
mmu-miR-449c-5p	mmu_circ_0000180	Tbc1d5	down	up	up
mmu-miR-449c-5p	mmu_circ_0000180	Lims2	down	up	up
mmu-miR-449c-5p	mmu_circ_0000180	Rbpms	down	up	up
mmu-miR-449c-5p	mmu_circ_0000180	Pxk	down	up	up
mmu-miR-449c-5p	mmu_circ_0000180	Vrk3	down	up	up
mmu-miR-449c-5p	mmu_circ_0000351	R3hdm2	down	up	up
mmu-miR-449c-5p	mmu_circ_0000351	Itgal	down	up	up
mmu-miR-449c-5p	mmu_circ_0000351	Upk1b	down	up	up
mmu-miR-449c-5p	mmu_circ_0000351	Rbbp7	down	up	up
mmu-miR-449c-5p	mmu_circ_0000351	Cyp4f18	down	up	up
mmu-miR-449c-5p	mmu_circ_0000351	Gpr146	down	up	up
mmu-miR-449c-5p	mmu_circ_0000351	Ms4a8a	down	up	up
mmu-miR-449c-5p	mmu_circ_0000351	Il1r2	down	up	up
mmu-miR-449c-5p	mmu_circ_0000375	Fiz1	down	up	up
mmu-miR-449c-5p	mmu_circ_0000375	Cldn23	down	up	up
mmu-miR-449c-5p	mmu_circ_0000375	Larp1b	down	up	up
mmu-miR-449c-5p	mmu_circ_0000064	Elof1	down	up	up
mmu-miR-449c-5p	mmu_circ_0000064	Brox	down	up	up
mmu-miR-449c-5p	mmu_circ_0000064	Ash2l	down	up	up
mmu-miR-449c-5p	mmu_circ_0000064	Tufm	down	up	up
mmu-miR-449c-5p	mmu_circ_0000064	Sept2	down	up	up
mmu-miR-449c-5p	mmu_circ_0000064	Fgf2	down	up	up
mmu-miR-449c-5p	mmu_circ_0000064	Raly	down	up	up
mmu-miR-449c-5p	mmu_circ_0000064	Slc38a10	down	up	up
mmu-miR-449c-5p	mmu_circ_0000064	1190007I07Rik	down	up	up
mmu-miR-449c-5p	mmu_circ_0000064	Acbd5	down	up	up
mmu-miR-449c-5p	mmu_circ_0000064	Arf3	down	up	up
mmu-miR-449c-5p	mmu_circ_0000181	Cacnb3	down	up	up
mmu-miR-449c-5p	mmu_circ_0000181	Tbc1d5	down	up	up
mmu-miR-449c-5p	mmu_circ_0000181	Rbpms	down	up	up
mmu-miR-449c-5p	mmu_circ_0000181	Vrk3	down	up	up
mmu-miR-449c-5p	mmu_circ_0000454	Elof1	down	up	up
mmu-miR-449c-5p	mmu_circ_0000454	Brox	down	up	up
mmu-miR-449c-5p	mmu_circ_0000454	Tufm	down	up	up
mmu-miR-449c-5p	mmu_circ_0000454	Sept2	down	up	up
mmu-miR-449c-5p	mmu_circ_0000454	H2-DMb1	down	up	up
mmu-miR-449c-5p	mmu_circ_0000454	Slc38a10	down	up	up
mmu-miR-449c-5p	mmu_circ_0000454	Pum1	down	up	up
mmu-miR-449c-5p	mmu_circ_0000454	Acbd5	down	up	up
mmu-miR-449c-5p	mmu_circ_0000454	Arf3	down	up	up
mmu-miR-449c-5p	mmu_circ_0000049	Brox	down	up	up
mmu-miR-449c-5p	mmu_circ_0000049	Sept2	down	up	up
mmu-miR-449c-5p	mmu_circ_0000049	H2-DMb1	down	up	up
mmu-miR-449c-5p	mmu_circ_0000049	Slc38a10	down	up	up
mmu-miR-449c-5p	mmu_circ_0000049	Pum1	down	up	up
mmu-miR-449c-5p	mmu_circ_0000049	Arf3	down	up	up
mmu-miR-449c-5p	mmu_circ_0001894	Phf21a	down	up	up
mmu-miR-449c-5p	mmu_circ_0001894	Nudt16	down	up	up
mmu-miR-449c-5p	mmu_circ_0001879	Bbc3	down	up	up
mmu-miR-449c-5p	mmu_circ_0000462	Fam151b	down	up	up
mmu-miR-449c-5p	mmu_circ_0000462	Eml1	down	up	up
mmu-miR-449c-5p	mmu_circ_0000462	Poc1b	down	up	up
mmu-miR-449c-5p	mmu_circ_0000462	Hyou1	down	up	up
mmu-miR-449c-5p	mmu_circ_0000477	Selenoo	down	up	up
mmu-miR-449c-5p	mmu_circ_0000477	Trak1	down	up	up
mmu-miR-449c-5p	mmu_circ_0001331	Elof1	down	up	up
mmu-miR-449c-5p	mmu_circ_0001331	Brox	down	up	up
mmu-miR-449c-5p	mmu_circ_0001331	Tufm	down	up	up
mmu-miR-449c-5p	mmu_circ_0001331	Sept2	down	up	up
mmu-miR-449c-5p	mmu_circ_0001331	H2-DMb1	down	up	up
mmu-miR-449c-5p	mmu_circ_0001331	Slc38a10	down	up	up
mmu-miR-449c-5p	mmu_circ_0001331	Pum1	down	up	up
mmu-miR-449c-5p	mmu_circ_0001331	Acbd5	down	up	up
mmu-miR-449c-5p	mmu_circ_0001331	Arf3	down	up	up
mmu-miR-466i-3p	mmu_circ_0001089	Dchs1	down	up	up
mmu-miR-466i-3p	mmu_circ_0001089	Ccdc114	down	up	up
mmu-miR-466i-3p	mmu_circ_0001089	Adh1	down	up	up
mmu-miR-466m-3p	mmu_circ_0000477	Selenoo	down	up	up
mmu-miR-466m-3p	mmu_circ_0000477	Raly	down	up	up
mmu-miR-466m-3p	mmu_circ_0000477	Trak1	down	up	up
mmu-miR-483-3p	mmu_circ_0000243	Msh3	up	down	down
mmu-miR-483-3p	mmu_circ_0000243	Pcdhgb4	up	down	down
mmu-miR-483-3p	mmu_circ_0000243	Lrp6	up	down	down
mmu-miR-483-3p	mmu_circ_0000243	Tecpr1	up	down	down
mmu-miR-483-3p	mmu_circ_0000243	Ano1	up	down	down
mmu-miR-483-3p	mmu_circ_0000243	Nol12	up	down	down
mmu-miR-483-3p	mmu_circ_0000243	Dna2	up	down	down
mmu-miR-483-3p	mmu_circ_0000243	Zfp493	up	down	down
mmu-miR-483-3p	mmu_circ_0000243	Eno3	up	down	down
mmu-miR-483-3p	mmu_circ_0000243	Abraxas2	up	down	down
mmu-miR-483-3p	mmu_circ_0000243	Ttc8	up	down	down
mmu-miR-483-3p	mmu_circ_0000243	Cacnb1	up	down	down
mmu-miR-483-3p	mmu_circ_0000243	Myo5a	up	down	down
mmu-miR-483-3p	mmu_circ_0000243	Ppbp	up	down	down
mmu-miR-483-3p	mmu_circ_0000328	Mdfic	up	down	down
mmu-miR-483-3p	mmu_circ_0000328	Rfx1	up	down	down
mmu-miR-483-3p	mmu_circ_0000328	Sorbs1	up	down	down
mmu-miR-483-3p	mmu_circ_0000328	Sema6d	up	down	down
mmu-miR-483-3p	mmu_circ_0000328	Ciita	up	down	down
mmu-miR-483-3p	mmu_circ_0000328	Zdhhc6	up	down	down
mmu-miR-483-3p	mmu_circ_0000328	Fermt3	up	down	down
mmu-miR-483-3p	mmu_circ_0000328	Ptprs	up	down	down
mmu-miR-483-3p	mmu_circ_0000328	Ptpn1	up	down	down
mmu-miR-483-3p	mmu_circ_0000328	Lrrn2	up	down	down
mmu-miR-483-3p	mmu_circ_0000013	Inpp5a	up	down	down
mmu-miR-483-3p	mmu_circ_0000013	Pnpla3	up	down	down
mmu-miR-483-3p	mmu_circ_0000013	Rbpms	up	down	down
mmu-miR-483-3p	mmu_circ_0001256	Ngef	up	down	down
mmu-miR-483-3p	mmu_circ_0001369	Ptms	up	down	down
mmu-miR-483-3p	mmu_circ_0001369	Dpp8	up	down	down
mmu-miR-483-3p	mmu_circ_0001369	Il1rl2	up	down	down
mmu-miR-489-3p	mmu_circ_0000181	Cacnb3	down	up	up
mmu-miR-5615-3p	mmu_circ_0000462	Fam151b	down	up	up
mmu-miR-5615-3p	mmu_circ_0000462	Poc1b	down	up	up
mmu-miR-5615-3p	mmu_circ_0000462	Hyou1	down	up	up
mmu-miR-5615-3p	mmu_circ_0000462	Eml1	down	up	up
mmu-miR-6946-5p	mmu_circ_0000243	Msh3	up	down	down
mmu-miR-6946-5p	mmu_circ_0000243	Pcdhgb4	up	down	down
mmu-miR-6946-5p	mmu_circ_0000243	Ano1	up	down	down
mmu-miR-6946-5p	mmu_circ_0000243	Tecpr1	up	down	down
mmu-miR-6946-5p	mmu_circ_0000243	Lrp6	up	down	down
mmu-miR-6946-5p	mmu_circ_0000243	Abraxas2	up	down	down
mmu-miR-6946-5p	mmu_circ_0000243	Zfp493	up	down	down
mmu-miR-6946-5p	mmu_circ_0000243	Eno3	up	down	down
mmu-miR-6946-5p	mmu_circ_0000243	Dna2	up	down	down
mmu-miR-6946-5p	mmu_circ_0000243	Ttc8	up	down	down
mmu-miR-6946-5p	mmu_circ_0000243	Cacnb1	up	down	down
mmu-miR-6946-5p	mmu_circ_0000243	Nol12	up	down	down
mmu-miR-6946-5p	mmu_circ_0000243	Myo5a	up	down	down
mmu-miR-6946-5p	mmu_circ_0000243	Ppbp	up	down	down
mmu-miR-6946-5p	mmu_circ_0000328	Mdfic	up	down	down
mmu-miR-6946-5p	mmu_circ_0000328	Ptpn1	up	down	down
mmu-miR-6946-5p	mmu_circ_0000328	Rfx1	up	down	down
mmu-miR-6946-5p	mmu_circ_0000328	Sorbs1	up	down	down
mmu-miR-6946-5p	mmu_circ_0000328	Zdhhc6	up	down	down
mmu-miR-6946-5p	mmu_circ_0000328	Sema6d	up	down	down
mmu-miR-6946-5p	mmu_circ_0000328	Lrrn2	up	down	down
mmu-miR-6946-5p	mmu_circ_0000328	Ptprs	up	down	down
mmu-miR-6946-5p	mmu_circ_0000328	Fermt3	up	down	down
mmu-miR-6946-5p	mmu_circ_0000013	Inpp5a	up	down	down
mmu-miR-6946-5p	mmu_circ_0000013	Pnpla3	up	down	down
mmu-miR-6946-5p	mmu_circ_0000013	Rbpms	up	down	down
mmu-miR-7033-5p	mmu_circ_0000462	Fam151b	down	up	up
mmu-miR-7033-5p	mmu_circ_0000462	Eml1	down	up	up
mmu-miR-7033-5p	mmu_circ_0000462	Poc1b	down	up	up
mmu-miR-7033-5p	mmu_circ_0000462	Hyou1	down	up	up
mmu-miR-7073-5p	mmu_circ_0000243	Pcdhgb4	up	down	down
mmu-miR-7073-5p	mmu_circ_0000243	Myo5a	up	down	down
mmu-miR-7073-5p	mmu_circ_0000243	Ppbp	up	down	down
mmu-miR-7073-5p	mmu_circ_0000243	Lrp6	up	down	down
mmu-miR-7073-5p	mmu_circ_0000243	Abraxas2	up	down	down
mmu-miR-7073-5p	mmu_circ_0000243	Nol12	up	down	down
mmu-miR-7073-5p	mmu_circ_0000243	Tecpr1	up	down	down
mmu-miR-7073-5p	mmu_circ_0000243	Dna2	up	down	down
mmu-miR-7073-5p	mmu_circ_0000243	Ano1	up	down	down
mmu-miR-7073-5p	mmu_circ_0000243	Ttc8	up	down	down
mmu-miR-7073-5p	mmu_circ_0000243	Cacnb1	up	down	down
mmu-miR-7073-5p	mmu_circ_0000243	Msh3	up	down	down
mmu-miR-7073-5p	mmu_circ_0000243	Eno3	up	down	down
mmu-miR-7073-5p	mmu_circ_0000243	Zfp493	up	down	down
mmu-miR-7073-5p	mmu_circ_0000328	Fermt3	up	down	down
mmu-miR-7073-5p	mmu_circ_0000328	Ptprs	up	down	down
mmu-miR-7073-5p	mmu_circ_0000328	Ptpn1	up	down	down
mmu-miR-7073-5p	mmu_circ_0000328	Rfx1	up	down	down
mmu-miR-7073-5p	mmu_circ_0000328	Sema6d	up	down	down
mmu-miR-7073-5p	mmu_circ_0000328	Mdfic	up	down	down
mmu-miR-7073-5p	mmu_circ_0000328	Sorbs1	up	down	down
mmu-miR-7073-5p	mmu_circ_0000328	Zdhhc6	up	down	down
mmu-miR-7073-5p	mmu_circ_0000328	Lrrn2	up	down	down
mmu-miR-7073-5p	mmu_circ_0000328	Ciita	up	down	down
mmu-miR-7073-5p	mmu_circ_0001256	Ngef	up	down	down
mmu-miR-7079-3p	mmu_circ_0000243	Eno3	up	down	down
mmu-miR-7079-3p	mmu_circ_0000243	Pcdhgb4	up	down	down
mmu-miR-7079-3p	mmu_circ_0000243	Ano1	up	down	down
mmu-miR-7079-3p	mmu_circ_0000243	Msh3	up	down	down
mmu-miR-7079-3p	mmu_circ_0000243	Tecpr1	up	down	down
mmu-miR-7079-3p	mmu_circ_0000243	Lrp6	up	down	down
mmu-miR-7079-3p	mmu_circ_0000243	Ttc8	up	down	down
mmu-miR-7079-3p	mmu_circ_0000243	Cacnb1	up	down	down
mmu-miR-7079-3p	mmu_circ_0000243	Abraxas2	up	down	down
mmu-miR-7079-3p	mmu_circ_0000243	Zfp493	up	down	down
mmu-miR-7079-3p	mmu_circ_0000243	Ppbp	up	down	down
mmu-miR-7079-3p	mmu_circ_0000243	Nol12	up	down	down
mmu-miR-7079-3p	mmu_circ_0000243	Myo5a	up	down	down
mmu-miR-7079-3p	mmu_circ_0000243	Dna2	up	down	down
mmu-miR-7079-3p	mmu_circ_0000328	Mdfic	up	down	down
mmu-miR-7079-3p	mmu_circ_0000328	Rfx1	up	down	down
mmu-miR-7079-3p	mmu_circ_0000328	Sorbs1	up	down	down
mmu-miR-7079-3p	mmu_circ_0000328	Lrrn2	up	down	down
mmu-miR-7079-3p	mmu_circ_0000328	Ptpn1	up	down	down
mmu-miR-7079-3p	mmu_circ_0000328	Sema6d	up	down	down
mmu-miR-7079-3p	mmu_circ_0000328	Ciita	up	down	down
mmu-miR-7079-3p	mmu_circ_0000328	Fermt3	up	down	down
mmu-miR-7079-3p	mmu_circ_0000328	Ptprs	up	down	down
mmu-miR-7079-3p	mmu_circ_0000328	Zdhhc6	up	down	down
mmu-miR-7091-5p	mmu_circ_0000243	Dna2	up	down	down
mmu-miR-7091-5p	mmu_circ_0000243	Ttc8	up	down	down
mmu-miR-7091-5p	mmu_circ_0000243	Cacnb1	up	down	down
mmu-miR-7091-5p	mmu_circ_0000243	Msh3	up	down	down
mmu-miR-7091-5p	mmu_circ_0000243	Lrp6	up	down	down
mmu-miR-7091-5p	mmu_circ_0000243	Ano1	up	down	down
mmu-miR-7091-5p	mmu_circ_0000243	Abraxas2	up	down	down
mmu-miR-7091-5p	mmu_circ_0000243	Pcdhgb4	up	down	down
mmu-miR-7091-5p	mmu_circ_0000243	Nol12	up	down	down
mmu-miR-7091-5p	mmu_circ_0000243	Zfp493	up	down	down
mmu-miR-7091-5p	mmu_circ_0000243	Eno3	up	down	down
mmu-miR-7091-5p	mmu_circ_0000243	Ppbp	up	down	down
mmu-miR-7091-5p	mmu_circ_0000243	Myo5a	up	down	down
mmu-miR-7091-5p	mmu_circ_0000243	Tecpr1	up	down	down
mmu-miR-7091-5p	mmu_circ_0000628	Tcf7l2	up	down	down
mmu-miR-7091-5p	mmu_circ_0000628	Magix	up	down	down
mmu-miR-7091-5p	mmu_circ_0000628	N4bp2l1	up	down	down
mmu-miR-7091-5p	mmu_circ_0000328	Lrrn2	up	down	down
mmu-miR-7091-5p	mmu_circ_0000328	Sema6d	up	down	down
mmu-miR-7091-5p	mmu_circ_0000328	Mdfic	up	down	down
mmu-miR-7091-5p	mmu_circ_0000328	Zdhhc6	up	down	down
mmu-miR-7091-5p	mmu_circ_0000328	Ciita	up	down	down
mmu-miR-7091-5p	mmu_circ_0000328	Fermt3	up	down	down
mmu-miR-7091-5p	mmu_circ_0000328	Ptprs	up	down	down
mmu-miR-7091-5p	mmu_circ_0000328	Ptpn1	up	down	down
mmu-miR-7091-5p	mmu_circ_0000328	Rfx1	up	down	down
mmu-miR-7091-5p	mmu_circ_0000328	Sorbs1	up	down	down
mmu-miR-7091-5p	mmu_circ_0000013	Inpp5a	up	down	down
mmu-miR-7091-5p	mmu_circ_0000013	Pnpla3	up	down	down
mmu-miR-7091-5p	mmu_circ_0001471	Nrxn1	up	down	down
mmu-miR-7091-5p	mmu_circ_0001471	Anln	up	down	down
mmu-miR-7092-5p	mmu_circ_0000243	Abraxas2	up	down	down
mmu-miR-7092-5p	mmu_circ_0000243	Tecpr1	up	down	down
mmu-miR-7092-5p	mmu_circ_0000243	Myo5a	up	down	down
mmu-miR-7092-5p	mmu_circ_0000243	Ano1	up	down	down
mmu-miR-7092-5p	mmu_circ_0000243	Lrp6	up	down	down
mmu-miR-7092-5p	mmu_circ_0000243	Ppbp	up	down	down
mmu-miR-7092-5p	mmu_circ_0000243	Nol12	up	down	down
mmu-miR-7092-5p	mmu_circ_0000243	Dna2	up	down	down
mmu-miR-7092-5p	mmu_circ_0000243	Ttc8	up	down	down
mmu-miR-7092-5p	mmu_circ_0000243	Cacnb1	up	down	down
mmu-miR-7092-5p	mmu_circ_0000243	Msh3	up	down	down
mmu-miR-7092-5p	mmu_circ_0000243	Zfp493	up	down	down
mmu-miR-7092-5p	mmu_circ_0000243	Eno3	up	down	down
mmu-miR-7092-5p	mmu_circ_0000243	Pcdhgb4	up	down	down
mmu-miR-7092-5p	mmu_circ_0000328	Fermt3	up	down	down
mmu-miR-7092-5p	mmu_circ_0000328	Rfx1	up	down	down
mmu-miR-7092-5p	mmu_circ_0000328	Ptpn1	up	down	down
mmu-miR-7092-5p	mmu_circ_0000328	Ptprs	up	down	down
mmu-miR-7092-5p	mmu_circ_0000328	Sema6d	up	down	down
mmu-miR-7092-5p	mmu_circ_0000328	Sorbs1	up	down	down
mmu-miR-7092-5p	mmu_circ_0000328	Zdhhc6	up	down	down
mmu-miR-7092-5p	mmu_circ_0000328	Lrrn2	up	down	down
mmu-miR-7092-5p	mmu_circ_0000328	Ciita	up	down	down
mmu-miR-7092-5p	mmu_circ_0000328	Mdfic	up	down	down
mmu-miR-7092-5p	mmu_circ_0000013	Inpp5a	up	down	down
mmu-miR-7092-5p	mmu_circ_0001369	Il1rl2	up	down	down
mmu-miR-7092-5p	mmu_circ_0001369	Ptms	up	down	down
mmu-miR-7092-5p	mmu_circ_0001369	Dpp8	up	down	down
mmu-miR-7240-5p	mmu_circ_0000243	Myo5a	up	down	down
mmu-miR-7240-5p	mmu_circ_0000243	Ano1	up	down	down
mmu-miR-7240-5p	mmu_circ_0000243	Lrp6	up	down	down
mmu-miR-7240-5p	mmu_circ_0000243	Tecpr1	up	down	down
mmu-miR-7240-5p	mmu_circ_0000243	Nol12	up	down	down
mmu-miR-7240-5p	mmu_circ_0000243	Abraxas2	up	down	down
mmu-miR-7240-5p	mmu_circ_0000243	Zfp493	up	down	down
mmu-miR-7240-5p	mmu_circ_0000243	Eno3	up	down	down
mmu-miR-7240-5p	mmu_circ_0000243	Ttc8	up	down	down
mmu-miR-7240-5p	mmu_circ_0000243	Dna2	up	down	down
mmu-miR-7240-5p	mmu_circ_0000243	Pcdhgb4	up	down	down
mmu-miR-7240-5p	mmu_circ_0000243	Ppbp	up	down	down
mmu-miR-7240-5p	mmu_circ_0000243	Cacnb1	up	down	down
mmu-miR-7240-5p	mmu_circ_0000243	Msh3	up	down	down
mmu-miR-7240-5p	mmu_circ_0000628	N4bp2l1	up	down	down
mmu-miR-7240-5p	mmu_circ_0000628	Magix	up	down	down
mmu-miR-7240-5p	mmu_circ_0000628	Tcf7l2	up	down	down
mmu-miR-7240-5p	mmu_circ_0000328	Mdfic	up	down	down
mmu-miR-7240-5p	mmu_circ_0000328	Ptpn1	up	down	down
mmu-miR-7240-5p	mmu_circ_0000328	Rfx1	up	down	down
mmu-miR-7240-5p	mmu_circ_0000328	Sorbs1	up	down	down
mmu-miR-7240-5p	mmu_circ_0000328	Sema6d	up	down	down
mmu-miR-7240-5p	mmu_circ_0000328	Zdhhc6	up	down	down
mmu-miR-7240-5p	mmu_circ_0000328	Lrrn2	up	down	down
mmu-miR-7240-5p	mmu_circ_0000328	Fermt3	up	down	down
mmu-miR-7240-5p	mmu_circ_0000328	Ciita	up	down	down
mmu-miR-7240-5p	mmu_circ_0000328	Ptprs	up	down	down
mmu-miR-7240-5p	mmu_circ_0000828	Akap5	up	down	down
mmu-miR-7240-5p	mmu_circ_0000828	Ptpn4	up	down	down
mmu-miR-7240-5p	mmu_circ_0000828	Psen1	up	down	down
mmu-miR-7240-5p	mmu_circ_0000828	Gar1	up	down	down
mmu-miR-7240-5p	mmu_circ_0000828	Mettl21e	up	down	down
mmu-miR-7667-5p	mmu_circ_0000180	Cacnb3	down	up	up
mmu-miR-7667-5p	mmu_circ_0000180	Tbc1d5	down	up	up
mmu-miR-7667-5p	mmu_circ_0000180	Lims2	down	up	up
mmu-miR-7667-5p	mmu_circ_0000180	Rbpms	down	up	up
mmu-miR-7667-5p	mmu_circ_0000180	Pxk	down	up	up
mmu-miR-7667-5p	mmu_circ_0000180	Vrk3	down	up	up
mmu-miR-7667-5p	mmu_circ_0000351	R3hdm2	down	up	up
mmu-miR-7667-5p	mmu_circ_0000351	Il1r2	down	up	up
mmu-miR-7667-5p	mmu_circ_0000351	Itgal	down	up	up
mmu-miR-7667-5p	mmu_circ_0000351	Rbbp7	down	up	up
mmu-miR-7667-5p	mmu_circ_0000351	Cyp4f18	down	up	up
mmu-miR-7667-5p	mmu_circ_0000351	Gpr146	down	up	up
mmu-miR-7667-5p	mmu_circ_0000351	Ms4a8a	down	up	up
mmu-miR-7667-5p	mmu_circ_0000375	Cldn23	down	up	up
mmu-miR-7667-5p	mmu_circ_0000375	Larp1b	down	up	up
mmu-miR-7667-5p	mmu_circ_0000181	Cacnb3	down	up	up
mmu-miR-7667-5p	mmu_circ_0000181	Tbc1d5	down	up	up
mmu-miR-7667-5p	mmu_circ_0000181	Rbpms	down	up	up
mmu-miR-7667-5p	mmu_circ_0000181	Vrk3	down	up	up
mmu-miR-7667-5p	mmu_circ_0001879	Bbc3	down	up	up
mmu-miR-7667-5p	mmu_circ_0000477	Selenoo	down	up	up
mmu-miR-7667-5p	mmu_circ_0000477	Raly	down	up	up
mmu-miR-7667-5p	mmu_circ_0000477	Trak1	down	up	up
mmu-miR-7667-5p	mmu_circ_0001089	Dchs1	down	up	up
mmu-miR-7667-5p	mmu_circ_0001089	Ccdc114	down	up	up
mmu-miR-7667-5p	mmu_circ_0001089	Adh1	down	up	up
mmu-miR-7688-5p	mmu_circ_0000243	Dna2	up	down	down
mmu-miR-7688-5p	mmu_circ_0000243	Nol12	up	down	down
mmu-miR-7688-5p	mmu_circ_0000243	Ano1	up	down	down
mmu-miR-7688-5p	mmu_circ_0000243	Lrp6	up	down	down
mmu-miR-7688-5p	mmu_circ_0000243	Myo5a	up	down	down
mmu-miR-7688-5p	mmu_circ_0000243	Abraxas2	up	down	down
mmu-miR-7688-5p	mmu_circ_0000243	Ppbp	up	down	down
mmu-miR-7688-5p	mmu_circ_0000243	Ttc8	up	down	down
mmu-miR-7688-5p	mmu_circ_0000243	Cacnb1	up	down	down
mmu-miR-7688-5p	mmu_circ_0000243	Msh3	up	down	down
mmu-miR-7688-5p	mmu_circ_0000243	Zfp493	up	down	down
mmu-miR-7688-5p	mmu_circ_0000243	Eno3	up	down	down
mmu-miR-7688-5p	mmu_circ_0000243	Pcdhgb4	up	down	down
mmu-miR-7688-5p	mmu_circ_0000243	Tecpr1	up	down	down
mmu-miR-7688-5p	mmu_circ_0000328	Ciita	up	down	down
mmu-miR-7688-5p	mmu_circ_0000328	Sema6d	up	down	down
mmu-miR-7688-5p	mmu_circ_0000328	Fermt3	up	down	down
mmu-miR-7688-5p	mmu_circ_0000328	Ptpn1	up	down	down
mmu-miR-7688-5p	mmu_circ_0000328	Ptprs	up	down	down
mmu-miR-7688-5p	mmu_circ_0000328	Zdhhc6	up	down	down
mmu-miR-7688-5p	mmu_circ_0000328	Lrrn2	up	down	down
mmu-miR-7688-5p	mmu_circ_0000328	Rfx1	up	down	down
mmu-miR-7688-5p	mmu_circ_0000328	Sorbs1	up	down	down
mmu-miR-7688-5p	mmu_circ_0000328	Mdfic	up	down	down
mmu-miR-7688-5p	mmu_circ_0000013	Inpp5a	up	down	down
mmu-miR-7688-5p	mmu_circ_0000013	Rbpms	up	down	down
mmu-miR-7688-5p	mmu_circ_0000013	Arhgef25	up	down	down
mmu-miR-7688-5p	mmu_circ_0000013	Pnpla3	up	down	down
mmu-miR-7688-5p	mmu_circ_0001256	Ngef	up	down	down
mmu-miR-7b-5p	mmu_circ_0000243	Abraxas2	up	down	down
mmu-miR-7b-5p	mmu_circ_0000243	Nol12	up	down	down
mmu-miR-7b-5p	mmu_circ_0000243	Pcdhgb4	up	down	down
mmu-miR-7b-5p	mmu_circ_0000243	Ttc8	up	down	down
mmu-miR-7b-5p	mmu_circ_0000243	Cacnb1	up	down	down
mmu-miR-7b-5p	mmu_circ_0000243	Msh3	up	down	down
mmu-miR-7b-5p	mmu_circ_0000243	Ano1	up	down	down
mmu-miR-7b-5p	mmu_circ_0000243	Lrp6	up	down	down
mmu-miR-7b-5p	mmu_circ_0000243	Tecpr1	up	down	down
mmu-miR-7b-5p	mmu_circ_0000243	Ppbp	up	down	down
mmu-miR-7b-5p	mmu_circ_0000243	Dna2	up	down	down
mmu-miR-7b-5p	mmu_circ_0000243	Zfp493	up	down	down
mmu-miR-7b-5p	mmu_circ_0000243	Eno3	up	down	down
mmu-miR-7b-5p	mmu_circ_0000243	Myo5a	up	down	down
mmu-miR-7b-5p	mmu_circ_0000628	Tcf7l2	up	down	down
mmu-miR-7b-5p	mmu_circ_0000628	N4bp2l1	up	down	down
mmu-miR-7b-5p	mmu_circ_0000328	Sema6d	up	down	down
mmu-miR-7b-5p	mmu_circ_0000328	Lrrn2	up	down	down
mmu-miR-7b-5p	mmu_circ_0000328	Sorbs1	up	down	down
mmu-miR-7b-5p	mmu_circ_0000328	Ptprs	up	down	down
mmu-miR-7b-5p	mmu_circ_0000328	Ptpn1	up	down	down
mmu-miR-7b-5p	mmu_circ_0000328	Rfx1	up	down	down
mmu-miR-7b-5p	mmu_circ_0000328	Zdhhc6	up	down	down
mmu-miR-7b-5p	mmu_circ_0000328	Ciita	up	down	down
mmu-miR-7b-5p	mmu_circ_0000328	Fermt3	up	down	down
mmu-miR-7b-5p	mmu_circ_0000328	Mdfic	up	down	down
mmu-miR-7b-5p	mmu_circ_0000828	Mettl21e	up	down	down
mmu-miR-7b-5p	mmu_circ_0000828	Akap5	up	down	down
mmu-miR-7b-5p	mmu_circ_0000828	Ptpn4	up	down	down
mmu-miR-7b-5p	mmu_circ_0000828	Psen1	up	down	down
mmu-miR-7b-5p	mmu_circ_0000828	Gar1	up	down	down
mmu-miR-7b-5p	mmu_circ_0000828	Zfp143	up	down	down
mmu-miR-8103	mmu_circ_0001089	Dchs1	down	up	up
mmu-miR-8103	mmu_circ_0001089	Ccdc114	down	up	up
mmu-miR-8103	mmu_circ_0001089	Adh1	down	up	up
mmu-miR-8103	mmu_circ_0001676	Lilr4b	down	up	up
mmu-miR-8103	mmu_circ_0001676	Snx5	down	up	up
mmu-miR-8103	mmu_circ_0001676	Ech1	down	up	up
mmu-miR-8103	mmu_circ_0001676	Limk1	down	up	up
mmu-miR-881-3p	mmu_circ_0000462	Fam151b	down	up	up
mmu-miR-881-3p	mmu_circ_0000462	Hyou1	down	up	up
