# Supplementary material for: Integrative Studies of Human Cord Blood Derived Mononuclear Cells and Umbilical Cord Derived Mesenchyme Stem Cells in Ameliorating Bronchopulmonary Dysplasia
Source: Front Cell Dev Biol. 2021 Nov 9;9:679866. doi: 10.3389/fcell.2021.679866 (PMC8631197; doi:10.3389/fcell.2021.679866)
Supplement: Supplementary file 7 [file Table_7.XLSX]

## Sheet: co_GO
symbol	group	log2FC	Pvalue
Anapc5	GF	3.3486	0.0299618
Anapc5	HF	3.40699	0.0221928
Atrx	GF	2.73844	0.0273418
Atrx	HF	5.45255	0.00111928
Aurkb	GF	-1.29146	0.0297749
Aurkb	HF	-5.98349	0.000258304
Bub1	GF	-1.66422	0.00443215
Bub1	HF	-3.24016	0.000187784
Cdc6	GF	-1.00655	0.0318556
Cdc6	HF	-2.45017	0.000589077
Cenpc1	GF	1.16662	0.0362619
Cenpc1	HF	1.62457	0.0168452
Cenpe	GF	-1.03193	0.0382711
Cenpe	HF	-2.66316	0.000114945
Cenpf	GF	-1.74587	0.00248524
Cenpf	HF	-3.89089	3.44254e-05
Cenph	GF	-1.33006	0.0491767
Cenph	HF	-2.93089	0.00243073
Dab2ip	GF	8.444	1.26359e-05
Dab2ip	HF	5.73518	0.0200878
Ect2	GF	-1.03259	0.00981769
Ect2	HF	-3.41556	0.000632307
Ehmt2	GF	8.06641	0.00856929
Ehmt2	HF	-3.58837	0.00663356
Ezh2	GF	-2.07425	0.00677862
Ezh2	HF	-2.05941	0.0253421
Fgfr3	GF	4.49287	0.000132885
Fgfr3	HF	1.19954	0.0481243
Hdac8	GF	-4.25886	0.0339316
Hdac8	HF	-3.72006	0.0491372
Hnrnpu	GF	7.37755	0.0275054
Hnrnpu	HF	8.00577	0.0124043
Kif4	GF	-1.1032	0.0191395
Kif4	HF	-2.5252	0.000379066
Knl1	GF	-5.31673	0.0184446
Knl1	HF	-7.44251	0.00501705
Mcmbp	GF	-2.87987	0.0405238
Mcmbp	HF	-3.09176	0.0473976
Mki67	GF	-1.78504	0.00234141
Mki67	HF	-3.48928	1.27591e-05
Naa60	GF	5.00782	0.00442768
Naa60	HF	6.66862	7.12633e-06
Nde1	GF	1.1079	0.031892
Nde1	HF	6.72297	0.0197454
Nusap1	GF	-4.56905	0.0328748
Nusap1	HF	-6.04838	0.00844168
Ptprc	GF	-1.02477	0.00792477
Ptprc	HF	-1.44406	0.0148134
Rmi2	GF	-1.8357	0.00136143
Rmi2	HF	-2.97003	7.45051e-05
Ska3	GF	-1.6518	0.0169404
Ska3	HF	-3.3138	0.000374643
Smc3	GF	-1.08848	0.0398337
Smc3	HF	-3.37592	0.00297071
Smc6	GF	-3.44018	0.000172486
Smc6	HF	-7.89739	0.0250735
Terf1	GF	-5.5921	0.0198407
Terf1	HF	-5.96074	0.0134098

## Sheet: UC-MSC  versus BPD _unique_GO
symbol	log2FC	Pvalue
Abl2	6.96733	0.021696
Abraxas2	1.40421	0.00345244
Actr3	-5.52946	0.012717
Adam17	1.24159	0.00665468
Adra1a	1.39418	0.0123694
Ager	-9.14339	0.00940058
Agt	-1.10515	0.01858
Akap8	-1.02871	0.0207315
Alkal1	1.2399	0.0213681
Alox15	1.76834	0.00705066
Anapc15	-2.41657	0.0211552
Anapc4	-1.21536	0.0216547
Arhgap24	-2.27232	0.00756508
Arhgap27	1.14489	0.04134
Arhgap42	1.17359	0.019389
Axin2	3.25771	0.0150514
C5ar1	1.43201	0.00850117
Ccl21a	-3.48943	0.0359656
Ccl25	-1.21312	0.0281686
Ccl6	1.42091	0.0186639
Cd44	4.16621	0.0361267
Cd44	-9.42557	2.68176e-06
Cd74	1.166	0.0129509
Cep63	-2.26753	0.00757678
Cep63	4.97379	0.0406393
Chmp6	1.03282	0.0416406
Chmp6	-1.613	0.0330447
Chn2	1.30382	0.0416357
Clcf1	4.71762	0.0338878
Csnk2a2	-1.05382	0.00532111
Csnk2a2	-1.57183	0.0415402
Cysltr2	1.57571	0.0365228
Dab2	1.17878	0.0298714
Dab2	1.69323	0.0428194
Dis3l2	-1.0412	0.0277586
Dock10	1.40107	0.00420039
Dock10	-5.38072	0.0449765
Dock11	1.21504	0.00476329
Dock7	2.42563	0.0248168
Dusp3	-1.03146	0.0297294
Ednra	-1.88676	0.00971342
Epha4	1.77333	0.00558942
Epha4	6.83672	0.0218465
Errfi1	-1.01499	0.01866
Espl1	3.96442	0.0497759
F11r	-2.90407	0.0221953
F11r	-4.42562	0.0260586
Fgf2	-1.68372	0.0148009
Fgfr2	1.27135	0.035323
Flcn	-8.69746	1.63264e-05
Fn1	-2.33401	0.00151548
Frs2	1.13876	0.0156336
Gcnt2	1.29098	0.0434697
Gnas	-1.23169	0.0127194
Gnas	7.2032	0.00650955
Gnas	-9.76537	0.000462735
Gpsm1	-5.2954	0.00541271
Gpsm1	6.28413	0.0429939
Hmgcr	-1.03631	0.0408706
Htr2a	-1.04705	0.00485153
Icam1	-1.41637	0.0472177
Iqgap1	-1.76328	0.0320263
Itga6	-1.12416	0.00347265
Kit	1.48673	0.0471648
Klhl22	-1.10607	0.0267421
Map10	-1.0036	0.00564728
Map4k4	4.09049	0.0366526
Mst1r	1.63317	0.0195861
Ncaph	-1.88388	0.0220619
Ndrg2	-3.96288	0.0347888
Ngef	1.40991	0.0296775
Npnt	-1.91143	0.00300533
Npnt	-2.65244	0.00342439
Nrp1	-2.86709	0.0475606
Nrxn1	4.62062	0.0349452
Ntf3	-4.12299	0.0412174
Nuf2	1.2398	0.0473284
Pdgfra	-5.86929	0.0449431
Pds5b	2.6344	0.044939
Pkp4	-1.59502	0.022829
Plxna3	4.34635	0.0476464
Plxnc1	1.9674	0.0341086
Prkg1	1.0079	0.0397346
Ptpn1	7.46403	4.65309e-06
Rack1	-1.28287	0.0040268
Rack1	3.10982	0.000947261
Rap1gap	1.15747	0.0166473
Rapgef2	1.95394	0.0126889
Rapgef3	-1.47091	0.0308193
Rapgef6	-2.10386	0.00410695
Rapgef6	-3.11917	0.000439546
Rapgef6	7.60127	0.0201741
Rara	6.06447	0.00845162
Rasa1	1.88668	0.0224418
Rasal3	1.57379	0.0473961
Rasgrp1	1.8819	0.0226203
Rec8	-1.29316	0.00658781
Rgl3	8.38206	1.18876e-06
Rgma	2.22874	0.00986896
Rps6ka6	-7.16106	0.0090783
Rrs1	-1.15677	0.0253409
Rsu1	1.42212	0.00413213
Sema6a	-8.27132	0.0254738
Sema7a	-1.40735	0.000960139
Sgsm1	1.74893	0.0376317
Sh3bp1	1.36494	0.035925
Sh3bp1	2.32081	0.0217066
Sipa1l1	7.49444	0.0158504
Sirpa	4.72618	0.000432576
Sirt2	3.48054	0.0126565
Slamf1	1.75047	0.0124683
Spice1	3.50149	0.0431924
Srgap2	1.099	0.00898857
St5	-6.53714	0.0231
Stag2	1.85313	0.0450841
Syde1	1.12791	0.00824557
Syngap1	4.05791	0.0178845
Synj2bp	2.05435	0.00953656
Tbc1d12	10.6221	1.09198e-05
Tbc1d16	2.18265	0.00645594
Tbc1d30	-2.24376	0.0415911
Tbc1d30	5.15249	0.00980091
Tbc1d5	1.07571	0.00404203
Tbc1d5	-5.66368	9.48472e-05
Tbc1d9	-1.6286	0.00723333
Timp3	-1.1723	0.0420905
Tlr4	1.31348	0.0343813
Trappc6b	-2.34392	0.00309003
Trappc6b	6.26635	0.0313081
Trem2	-5.51784	0.011251
Trf	-4.64665	0.0195068
Ttc8	2.90854	0.00139246
Usp6nl	-1.31939	0.0189757
Vps4b	-1.74652	0.0176627
Vrk3	-6.34694	0.000104499
Wnk1	1.57435	0.0271601
Wnt11	-1.66534	0.036614
Wnt5a	4.89978	0.0246827
Zfp36l1	-1.41149	0.000577992

## Sheet: CB-MNC versus  BPD _unique_GO
log2FC	Pvalue	symbol
-5.6180461602789	0.0192261	Abraxas1
3.72410715383419	0.00470586	Abraxas1
-2.55694955386881	0.0444564	Ankrd17
2.6143874532216	0.0245982	Ankrd17
-1.23996587755553	0.043206	Arpp19
-2.83925937502891	0.00437628	Aurka
-3.944922647961	0.0248355	Aurka
2.62002417481043	0.0270715	Babam2
-2.57812768400464	0.000483381	Birc5
-1.14007564183133	0.0291434	Blm
-4.23230332813782	0.0119876	Brca1
-2.40447966526448	0.00188231	Brca1
-4.31104845815911	0.012589	Brca2
-1.49613743196736	0.0356527	Brca2
-2.13661242386211	0.000198892	Brip1
-1.68698660098011	0.000571746	Bub1b
-2.01484840326822	0.00223365	Bub1b
-7.62147821158034	0.0295613	Camk2d
-1.96971803280317	0.0465897	Camk2g
-6.9031815757074	5.55634e-06	Ccna2
-2.7613405129241	2.56007e-05	Ccna2
-2.87471010836725	0.000937104	Ccnb1
-2.46211174087484	0.000657849	Ccnb2
-1.09166989976921	0.00560327	Ccnd1
3.041669966132	0.0121148	Ccnd3
-1.50082381347289	0.0425601	Ccnd3
-2.31244907686113	0.0113042	Ccne1
8.86530452744215	4.80479e-06	Ccne2
-11.588367773954	1.42578e-07	Ccne2
-2.7258385235937	0.00073604	Ccnf
-1.33978894022161	0.0356782	Ccno
-2.88781418416183	0.000884287	Cdc20
-3.26769937063776	0.000621989	Cdc25c
-1.79103753882255	0.0382076	Cdc27
-7.09504702062462	3.51585e-05	Cdca2
-1.89893843240291	0.00637335	Cdca2
-3.44543823781462	0.00514489	Cdca2
-7.39819838510274	0.000235011	Cdca2
-2.58315449583154	0.0107436	Cdca5
-2.87720578099177	0.00212515	Cdca8
-3.1636788208037	0.000355659	Cdk1
-1.22005389958593	0.0110412	Cdk4
-1.09460559618279	0.00457001	Cdk4
-2.18076768294428	0.00604423	Cdk4
5.5525642504984	0.0316075	Cdk9
4.30377352332299	0.026626	Cdkn1a
1.44637904514399	0.0408207	Cdkn1a
-4.98730050076214	0.0449899	Cdkn2c
-6.71183957673098	0.0094881	Cdkn2d
-1.44463575946309	0.0176613	Cdt1
-7.33277237977568	0.000257682	Cenpn
3.49994933216884	0.0469085	Cenpn
-1.12926682247586	0.00465119	Cenpq
-2.20235792761895	0.0260986	Cenpx
-1.23293620632931	0.0154845	Cep192
-4.90909223471027	0.0208755	Chek2
1.5299905624259	0.0437352	Chmp4b
-1.43512948319048	0.00334981	Cit
-6.58792032217669	0.0107072	Cit
-1.52966790097553	0.00812053	Cks1b
-2.86044535705355	0.00132349	Cks2
-3.13323650111443	0.0485155	Ctdspl
1.08867685245491	0.0195896	Cyp1a1
-1.68209244622629	0.01603	Dbf4
-1.4462691554087	0.0470012	Dgkz
-3.21695745319315	3.48233e-05	Dtl
-2.01821539181316	0.00473637	Dtl
-6.40991354906547	0.0158585	E2f1
-2.40361036223743	0.00711908	E2f7
-2.63464704621541	0.000777383	E2f8
-4.564398134635	0.00852598	E2f8
-6.26666827857089	0.0234191	Eif4ebp1
-2.76442056857655	0.000965852	Eme1
-3.07440640474332	0.00010173	Esco2
-4.26609711760785	0.00055307	Esco2
-2.63559456202932	0.000516409	Esco2
6.88787684323774	0.0133084	Fam107a
-5.82388251479295	0.00742587	Fam83d
-1.68750248110218	0.000236425	Fancd2
-2.31711793744738	0.0475724	Fancd2
-5.83288081956739	9.27616e-05	Fancd2
1.25399090958904	0.0171007	Fbxo31
-1.15532370475896	0.0125217	Fbxo5
3.79596542296649	0.0226295	Fbxo7
-4.72014919061391	0.00495393	Fen1
1.62158870326834	0.017806	Fhl1
-6.05512817237699	0.0232269	Fhl1
-1.40111435051922	0.0367688	Fhl1
1.04561496895964	0.00664378	Fhl1
2.81366487716681	0.0482816	Flna
2.20670300774172	0.00248882	Flna
1.29311064825169	0.00773863	Flna
2.46349	0.00536482	Foxm1
-1.9057122521565	0.00184315	Gen1
-1.0707079700975	0.00344979	Grb14
-1.20394807471329	0.0211044	Grb14
-2.02921455010324	0.000877181	Haspin
-7.92318558289778	0.00200718	Hinfp
3.09186527103628	0.00262676	Hyal1
1.86971743928947	0.011129	Ino80
1.80068470108552	0.0325633	Insr
-4.70211176375235	0.0456789	Iqgap3
-2.73887888008319	0.000123726	Kif11
-1.5594052417723	0.00736701	Kif18a
-3.35356652404355	0.000662121	Kif18b
-1.72271796422469	0.00063018	Kif20b
-2.12169749638791	0.00269128	Kif20b
-3.17659510002746	0.00184481	Kif22
-2.68820020001872	0.000718678	Kif23
-2.58889243325057	0.0064098	Kif23
-2.28731694282534	0.00465792	Kif23
-1.83553301576992	0.0340256	Kif23
-2.67071887355249	0.0012738	Kif2c
-2.7960103607701	0.0010336	Kifc1
1.37078141806131	0.000975609	Klf11
-6.51570420178931	0.000642754	Knstrn
1.07332815970695	0.0405566	Larp7
-1.43435670022621	0.0122792	Lmnb1
-2.1748624182568	0.000658681	Mastl
-2.30513315975077	0.0164593	Mdm1
-1.06621812051911	0.0482861	Mdm1
-3.78985312358385	0.000950674	Mdm4
5.98976301392119	0.0403853	Men1
2.23106862000211	0.0439867	Mms19
-3.59222170627579	0.00110391	Mtbp
5.24545172489678	0.045844	Myb
-1.91117100115839	0.0477432	Myb
-1.58300999267983	0.00231714	Mybl2
-1.89842614827826	0.00873026	Ncapd2
-2.4682853957625	0.00762959	Ncapd2
-2.19542450696993	0.00081874	Ncapd2
-1.63084732956728	0.00764478	Ncapd2
-6.02267598545085	0.00346434	Ncapg
-5.1723562347286	0.0192278	Ncapg
-3.73783959110554	0.000172563	Ncapg
-3.63001781815013	0.00323586	Ncapg
1.63830634815415	0.00850848	Ncaph2
-2.6949458366409	0.00030256	Ndc80
1.18585549922193	0.00918041	Nek11
-6.53938118274823	0.0332844	Nfatc1
-6.45555759894809	0.0398578	Nfatc1
5.34978386375061	0.0446068	Nme6
-2.19650588812924	0.0123118	Nsl1
1.06994205017882	0.0227006	Nubp1
-1.9537472038151	0.0433076	Oip5
-2.45590949456165	0.00492359	Orc1
10.0690308655995	0.0102931	Pdgfrb
1.17720779755351	0.0448075	Pds5a
-6.21229960271262	0.0229643	Pibf1
-1.94697132113733	0.0231067	Pidd1
2.30597462427601	0.0383312	Plcb1
-2.29278759692601	0.00379336	Plk1
-7.75930076824184	0.0100959	Pml
-1.89805975602468	0.000407942	Pole
-1.75090099234437	0.00871883	Prmt2
1.1487155483719	0.0272707	Psme1
-1.80808039583904	0.00528173	Psrc1
-1.75874088669489	0.0367467	Ptpn6
1.04938620943624	0.0371438	Pttg1
-3.55425870358132	0.000349104	Racgap1
-1.68793675516221	0.00586447	Racgap1
-7.7560925933164	0.00331923	Rad17
1.69784830913923	0.00163615	Rassf1
6.57986874948937	0.035003	Rassf1
-1.20796825033816	0.00245808	Rbl1
-1.60530220698127	0.00651468	Rbl1
-2.7658845126357	0.0346772	Rbm38
-1.26724666243429	0.00899025	Rcc1
-6.28204217113581	0.0164146	Rfwd3
1.54765045324517	0.024721	Rhoa
-2.31123444571751	0.00020593	Sgo1
5.8424536134587	0.0195227	Sh2b1
-6.30875972541237	0.013792	Sin3a
7.1147913941582	0.00102199	Sirt7
-1.57117844030406	0.00405068	Ska2
6.91077	3.71903e-06	Sirt3
-1.10810450222539	0.00484208	Skp2
-1.81942998444932	0.00765014	Skp2
2.05603103729191	0.044484	Slc25a5
6.05233691810936	0.0405826	Slfn1
5.4505588041311	2.56581e-05	Smarcad1
-1.10564742463417	0.00961512	Smc2
-1.08652411147019	0.0323054	Smc5
-6.73004400966174	0.0305022	Spag5
-4.04190716203588	0.0182478	Spag5
-1.08940279125205	0.0170074	Spast
-2.56143856709292	0.00150426	Spc25
-2.6214535046558	0.0058164	Spdl1
-10.1262369744626	0.000126993	Stil
-1.13422221527443	0.0158726	Stxbp4
1.50403863015816	0.0156964	Syf2
4.91913136689835	0.0230379	Tacc3
-6.55262513265703	0.0103599	Tacc3
1.24337910991369	0.0231409	Taf2
-4.23590470411274	0.00948116	Taf2
1.78906585352775	0.000886124	Taf2
-3.74253640362579	0.0205299	Tex15
-1.89733197503745	0.00791708	Tex15
-2.40907725478783	0.000539637	Ticrr
-3.4454069233302	0.00932373	Timeless
-4.04644013262243	0.0248173	Tlk2
7.68314410611269	0.0155981	Tmem67
-1.69985726980818	0.00120901	Tmem67
-2.95808994924177	0.000249393	Top2a
-2.85078256524074	0.0163709	Top2a
-3.12614220096892	0.00417306	Top2a
-5.23995374305862	0.00650007	Top2a
-2.30878437514636	0.013267	Tpra1
-5.58464430247939	0.0483063	Tpx2
-4.88745822036967	0.0379527	Tpx2
-6.39933574533578	0.0159915	Tpx2
-5.14509470100455	0.0325793	Tpx2
-1.60991141403072	0.00370246	Trip13
-3.65609820453617	0.00139654	Ttk
-2.16276390719945	0.00428881	Ube2c
3.44235659651198	0.0414588	Ube2e2
1.32492107610857	0.00433797	Usp47
9.43260166933466	1.18807e-05	Wnt10b
-1.31224543898168	0.00638087	Zc3h12d
-2.07846297486894	0.0125478	Zfp207

## Sheet: co_Gsea
log2FC	Pvalue	symbol	group
5.06683	1.92071e-06	Clic3	GF
9.68023	0.0143988	Clic3	HF
5.84782823855808	0.0345322	Kdm4b	GF
8.29551142124181	0.000251846	Kdm4b	HF
5.5075130021673	0.026316	Pxn	GF
9.88432910536745	0.0135839	Pxn	HF
6.61391341863827	0.00469398	Sh3bp5	GF
7.40645805496283	0.0145938	Sh3bp5	HF
6.71941221916645	0.000433848	Trafd1	GF
1.52390403026216	0.0163739	Trafd1	HF
-4.9982	0.0250852	Tsku	GF
-7.50156	0.0109873	Tsku	HF

## Sheet: UC-MSC versus BPD_unique_gsea
log2FC	Pvalue	symbol
6.71102321842211	0.000832359	Sgms1
9.39709648863739	0.0126002	Vwa5a
-1.13783246239743	0.0370941	Ablim1
1.23704855687306	0.0323203	Phf7
4.04510525183157	0.00777482	Angptl4
1.47090514702007	0.0308193	Rapgef3
-7.60126651271727	0.0201741	Rapgef6
-5.44636861905608	0.0274053	Epb41
2.33401	0.00151548	Fn1
-2.04562239535365	0.0450209	Ccnd3
6.32513347234849	0.0166693	Il33
9.51842427550505	0.000391413	Peg3
7.55066611615425	0.0136318	Usp14
4.13138785905601	0.0237931	H2-DMb1
1.88081586861991	0.00715027	Arl4a
1.64109759682624	0.0423993	Fkbp5
5.38071760214981	0.0449765	Dock10
1.17229798215899	0.0420905	Timp3
-1.40107100966652	0.00420039	Dock10
2.10385863970505	0.00410695	Rapgef6
2.59360498090564	0.0316111	Bmp1
1.13593530204653	0.0172824	Rps9
-4.07050322129765	0.0419382	Ccnd3
4.3449800183177	0.00597258	Epb41l3
1.28649632794635	0.0140177	Serping1
5.22815504367061	0.000915631	Prss36
1.20385363888429	0.0144606	Tmem176a
4.87408388930301	0.0159993	Tmem176a
2.67326649717233	0.0342112	Ap2b1
4.29532741021877	0.0315796	Phf7
1.15644620095561	0.00376695	Acox2
3.11917040329714	0.000439546	Rapgef6

## Sheet: CB-MNC versus BPD_unique_gsea
log2FC	Pvalue	symbol
1.11478250708655	0.0494983	Cd44
3.72419451127996	0.00722854	Lpl
-6.04837776114164	0.00844168	Nusap1
7.60618522530347	9.97207e-06	Azgp1
-1.2223542890729	0.0160238	Tlr3
1.1995428572036	0.0481243	Fgfr3
1.49966870616953	0.0145422	Ech1
3.01531853448025	0.0271719	Fgfr3
8.00576632815388	0.0124043	Hnrnpu
1.95090455951463	0.0222999	Ech1
2.82128153595819	0.0497892	Ucp2
1.11195399570221	0.0489088	Trib3
5.62969245391367	0.0100547	Htra2
-2.77217774480729	0.00570588	Ncoa7
2.71688580054216	0.0276409	Pex11a
2.17652290464183	2.47228e-05	Errfi1
2.31673600040442	0.00443053	Ucp2
1.2767413338156	0.0447503	Lpl
4.68525246564657	0.036258	Smox
-3.86129884678042	0.0495518	H2-T23
3.79747446852372	0.0231675	Abca3
2.10714337090109	0.00948596	Lpl
